# Supplementary material for: Whole-Transcriptome Sequencing of Knee Joint Cartilage from Kashin–Beck Disease and Osteoarthritis Patients
Source: MDPI journal article supplement (doi:10.3390/ijms25084348), 2024-04-15
Supplement: s1 [file s1]

**Supplementary Table S14. Characteristics of subjects enrolled in whole-transcriptome sequencing**

| KBD (n=8) |        |               | OA (n=10) |        |                   |
|-----------|--------|---------------|-----------|--------|-------------------|
| Age       | Sex    | Current Grade | Age       | Sex    | Current K/L Grade |
| 58        | Male   | III           | 65        | Male   | III               |
| 65        | Male   | III           | 65        | Male   | III               |
| 60        | Female | II            | 68        | Male   | III               |
| 69        | Female | III           | 61        | Female | III               |
| 58        | Female | III           | 62        | Female | III               |
| 63        | Female | III           | 61        | Female | II                |
| 58        | Female | II            | 59        | Female | II                |
| 63        | Female | III           | 64        | Female | III               |
| /         | /      | /             | 51        | Female | III               |
| /         | /      | /             | 64        | Female | III               |

KBD, Kashin-Beck disease; OA, Osteoarthritis; K/L, Kellgren/Lawrence.
