# Supplementary material for: Whole-Transcriptome Sequencing of Knee Joint Cartilage from Kashin–Beck Disease and Osteoarthritis Patients
Source: Int J Mol Sci. 2024 Apr 15;25(8):4348. doi: 10.3390/ijms25084348 (PMC11049856; doi:10.3390/ijms25084348)
Supplement: Supplementary file 1 [file ijms-25-04348-s001.zip]

Archive with 15 entries (15 files):
- Supplementary Table S10.xlsx
- Supplementary Table S11.xlsx
- Supplementary Table S12_KBDVSOA_lncRNA_targetPrediction_diff.xlsx
- Supplementary Table S13_predicted_miRNAs_bind_to_circRNAs.xlsx
- Supplementary Table S14.pdf
- Supplementary Table S15_PCR primer.xlsx
- Supplementary Table S1_KBDVSOA_Gene_differential_expression.xlsx
- Supplementary Table S2_KBDVSOA_GO_enrichment.xlsx
- Supplementary Table S3_KBDVSOA_KEGG_enrichment.xlsx
- Supplementary Table S4_KBDVSOA_Novel_lncRNA_differential_expression.xlsx
- Supplementary Table S5_KBDVSOA_GO_enrichment_lncRNA.xlsx
- Supplementary Table S6_KBDVSOA_KEGG_enrichment_lncRNA.xlsx
- Supplementary Table S7_KBDVSOA_circRNA_differential_expression.xlsx
- Supplementary Table S8_KBDVSOA_GO_enrichment_Gene.xlsx
- Supplementary Table S9_KBDVSOA_KEGG_enrichment_Gene.xlsx
