# Supplementary material for: Whole-Transcriptome Sequencing of Knee Joint Cartilage from Kashin–Beck Disease and Osteoarthritis Patients
Source: Int J Mol Sci. 2024 Apr 15;25(8):4348. doi: 10.3390/ijms25084348 (PMC11049856; doi:10.3390/ijms25084348)
Supplement: Supplementary file 1 [file ijms-25-04348-s001.zip › Supplementary Table S1_KBDVSOA_Gene_differential_expression.xlsx]

## Sheet: Sheet1
Supplementary Table S1. Differentially expressed mRNA between KBD and OA
gene_id	gene_name	transcript_id	fc	log2(fc)	pval	qval	regulation	significant
MSTRG.95243	KCNJ16	ENST00000392670;ENST00000591891;ENST00000615244	0.00240581	-8.69926	7.23817e-23	8.28958e-18	down	yes
MSTRG.92958	KRT15	ENST00000393974	0.0018179	-9.10351	8.61456e-22	6.57728e-17	down	yes
MSTRG.117666	SFT2D3	ENST00000310981	0.00125937	-9.63308	4.91875e-16	1.39035e-12	down	yes
MSTRG.96751	AKAIN1	ENST00000434239	0.00164897	-9.24422	2.96616e-15	1.39035e-12	down	yes
MSTRG.31140	OR2T2	ENST00000641925;ENST00000342927	0.00202066	-8.95096	3.60477e-15	1.39035e-12	down	yes
MSTRG.55587	KRT6A	ENST00000330722	0.000926953	-10.0752	7.84628e-15	2.80375e-12	down	yes
MSTRG.218684	MSMP	ENST00000436428	0.0107196	-6.54361	6.08015e-13	2.06322e-10	down	yes
MSTRG.141196	PTH1R	ENST00000422115;ENST00000313049;ENST00000449590;ENST00000427125	3.97943	1.99256	9.49547e-08	3.2079e-05	up	yes
MSTRG.87514	SMPD3	ENST00000568373;ENST00000219334;ENST00000563226;ENST00000574662	7.07419	2.82257	2.3992e-07	8.0578e-05	up	yes
MSTRG.17573	HOOK1	ENST00000371208	0.340543	-1.55409	1.00721e-06	0.000333871	down	yes
MSTRG.45759	NRXN2	ENST00000265459;ENST00000423049;ENST00000409571;ENST00000377559;ENST00000301894	2.64148	1.40135	1.78541e-06	0.00058673	up	yes
MSTRG.163672	DCHS2	ENST00000357232;ENST00000339452	0.462857	-1.11136	4.68832e-06	0.00150613	down	yes
MSTRG.166233	DUX4	ENST00000616166;ENST00000565211	0.0074141	-7.07551	5.24992e-06	0.0016748	down	yes
MSTRG.90623	HS3ST3A1	ENST00000284110;ENST00000578576	0.33655	-1.57111	5.48462e-06	0.00174724	down	yes
MSTRG.91904	CORO6	ENST00000580212;ENST00000388767;ENST00000345068;ENST00000492276	3.17925	1.66869	6.63033e-06	0.00209764	up	yes
MSTRG.148175	ZIC4	ENST00000462748;ENST00000484586;ENST00000525172;ENST00000383075;ENST00000425731	3.72211	1.89612	9.74666e-06	0.00304569	up	yes
MSTRG.42768	SVIP	ENST00000354193	0.47637	-1.06984	1.29435e-05	0.00396884	down	yes
MSTRG.42440	SAA1	ENST00000356524;ENST00000405158;ENST00000649195;ENST00000532858	0.0275876	-5.17984	1.43968e-05	0.00439096	down	yes
MSTRG.134746	CLTCL1	ENST00000622493;ENST00000427926;ENST00000449918;ENST00000621271	2.10561	1.07424	1.99034e-05	0.00593609	up	yes
MSTRG.212201	GDF6	ENST00000287020	0.245081	-2.02867	2.08766e-05	0.00618607	down	yes
MSTRG.107439	KLK1	ENST00000301420	1464.33	10.516	2.40394e-05	0.00706837	up	yes
MSTRG.194021	VWDE	ENST00000275358;ENST00000649524;ENST00000644150;ENST00000614403	0.278396	-1.84479	3.20202e-05	0.00917935	down	yes
MSTRG.80103	ITGA11	ENST00000423218;ENST00000315757	2.3637	1.24105	3.4976e-05	0.00995195	up	yes
MSTRG.42226	PDE3B	ENST00000282096	0.51267	-0.963898	4.62176e-05	0.0128943	down	no
MSTRG.104331	LPAR2	ENST00000407877;ENST00000591042;ENST00000542587;ENST00000592061;ENST00000588461;ENST00000586703	2.29706	1.19979	4.847e-05	0.0134735	up	yes
MSTRG.25458	PAPPA2	ENST00000367662;ENST00000367661	0.391898	-1.35145	5.02554e-05	0.0139528	down	yes
MSTRG.97229	PIEZO2	ENST00000580640;ENST00000302079;ENST00000579949;ENST00000674853;ENST00000579112;ENST00000503781	0.399247	-1.32465	5.08996e-05	0.0140975	down	yes
MSTRG.29916	MAP3K21	ENST00000366624;ENST00000366623;ENST00000366622	0.333366	-1.58482	5.60162e-05	0.0153293	down	yes
MSTRG.66226	LMO7;UCHL3	ENST00000341547;ENST00000524651;ENST00000377499;ENST00000465261;ENST00000489941;ENST00000534657;ENST00000533809;ENST00000357063;ENST00000525373;ENST00000618773;ENST00000526202;ENST00000377595;ENST00000321797;ENST00000526528;ENST00000525914;ENST00000419068;ENST00000526371;ENST00000525107	2.55898	1.35557	6.67595e-05	0.0178638	up	yes
MSTRG.108815	RNF144A	ENST00000320892;ENST00000432850	2.22618	1.15457	6.80365e-05	0.018163	up	yes
MSTRG.58373	SLC6A15	ENST00000266682;ENST00000450363;ENST00000551010;ENST00000549540	0.0977811	-3.3543	6.92551e-05	0.0184454	down	yes
MSTRG.106338	GRIK5	ENST00000262895;ENST00000593562;ENST00000301218	0.390422	-1.35689	7.29451e-05	0.0193258	down	yes
MSTRG.219340	AL391987	ENST00000605259	0.173327	-2.52843	8.14963e-05	0.021407	down	yes
MSTRG.54643	PRICKLE1	ENST00000639958;ENST00000345127;ENST00000640646;ENST00000640801;ENST00000548696;ENST00000639566;ENST00000552240;ENST00000640132;ENST00000455697;ENST00000547113;ENST00000551050;ENST00000639589	2.58648	1.37099	9.75297e-05	0.0249602	up	yes
MSTRG.104703	ZNF676	ENST00000397121;ENST00000650058	5.07551	2.34355	0.000112577	0.0283051	up	yes
MSTRG.12441	TMEM52	ENST00000378602;ENST00000416272;ENST00000378598;ENST00000310991	0.248566	-2.0083	0.000117894	0.0293203	down	yes
MSTRG.190018	CTAGE9	ENST00000314099	0.758985	-0.397857	0.000122515	0.0302721	down	no
MSTRG.63097	STARD13	ENST00000399365;ENST00000255486;ENST00000336934;ENST00000439831;ENST00000567873	1.82204	0.865554	0.000125545	0.0309208	up	no
MSTRG.220265	PRUNE2	ENST00000443509;ENST00000424866;ENST00000426088;ENST00000376718	2.16453	1.11405	0.000126976	0.0311392	up	yes
MSTRG.5842	NAP1L2	ENST00000373517	0.306281	-1.70707	0.000129597	0.0317142	down	yes
MSTRG.68528	IRS2	ENST00000375856	0.688926	-0.53758	0.000133506	0.0323595	down	no
MSTRG.61816	ADGRD1	ENST00000543617;ENST00000261654;ENST00000535015	3.76485	1.91259	0.000136279	0.0329513	up	yes
MSTRG.90342	NTN1	ENST00000173229;ENST00000436734	0.465299	-1.10377	0.000147671	0.035124	down	yes
MSTRG.183362	RUNX2	ENST00000647337;ENST00000576263;ENST00000371438;ENST00000371432;ENST00000371436;ENST00000359524;ENST00000625924	3.02157	1.5953	0.000149073	0.0353838	up	yes
MSTRG.183949	GCLC	ENST00000514004;ENST00000513939;ENST00000509541;ENST00000643939;ENST00000650454	0.71486	-0.484268	0.00015743	0.0370602	down	no
MSTRG.160208	LEF1	ENST00000512172;ENST00000515500;ENST00000265165;ENST00000438313;ENST00000379951;ENST00000510624	4.80139	2.26345	0.000163924	0.0383134	up	yes
MSTRG.23007	H2AC21	ENST00000331128	0.605193	-0.724533	0.000174253	0.040235	down	no
MSTRG.21647	KCND3	ENST00000315987;ENST00000369697	0.510051	-0.971287	0.000178474	0.0409208	down	no
MSTRG.51391	GLB1L3	ENST00000389887;ENST00000431683	0.462229	-1.11332	0.000204912	0.0456572	down	yes
MSTRG.29310	LEFTY2	ENST00000366820;ENST00000420304	9.6193	3.26593	0.000207613	0.0460796	up	yes
MSTRG.84429	EEF2K	ENST00000263026	1.66243	0.733294	0.000212015	0.0468751	up	no
MSTRG.26908	CRB1	ENST00000367399;ENST00000367397;ENST00000535699;ENST00000448952	0.55015	-0.862103	0.000227699	0.0497188	down	no
MSTRG.103889	CYP4F11	ENST00000248041;ENST00000620614;ENST00000591841;ENST00000402119;ENST00000326742	0.106496	-3.23113	0.000235813	0.0507644	down	no
MSTRG.142648	TAFA1	ENST00000478136;ENST00000496687;ENST00000617084	0.256004	-1.96576	0.000236883	0.0508991	down	no
MSTRG.155202	SHISA3	ENST00000319234	0.161858	-2.6272	0.000243457	0.0518256	down	no
MSTRG.36323	CDH23	ENST00000398788;ENST00000224721;ENST00000622827;ENST00000466757;ENST00000470494;ENST00000461841;ENST00000442677;ENST00000646131;ENST00000299366;ENST00000398809	2.3296	1.22008	0.000246952	0.0523833	up	no
MSTRG.190962	STX11	ENST00000367568	0.553171	-0.854201	0.000247481	0.0524386	down	no
ENSG00000185176	AQP12B	ENST00000407834	0.00484098	-7.69048	0.000253049	0.0534206	down	no
MSTRG.148177	ZIC1	ENST00000282928;ENST00000488404	3.05221	1.60985	0.000254683	0.0536583	up	no
MSTRG.163794	NPY2R	ENST00000329476;ENST00000506608	0.00273014	-8.51681	0.00026525	0.0554343	down	no
MSTRG.142520	KBTBD8	ENST00000417314;ENST00000460784;ENST00000484414	0.544016	-0.87828	0.000284918	0.0586879	down	no
MSTRG.55688	SP7	ENST00000536324;ENST00000537210;ENST00000547755;ENST00000303846	4.89438	2.29113	0.000286218	0.0587971	up	no
MSTRG.224951	TOR4A	ENST00000357503	0.600227	-0.736421	0.000297961	0.0605041	down	no
MSTRG.6367	MAGT1	ENST00000618282;ENST00000373336;ENST00000358075;ENST00000610432	0.47283	-1.08061	0.000303565	0.0614242	down	no
MSTRG.40113	DMBT1	ENST00000338354;ENST00000619379;ENST00000368909;ENST00000664003;ENST00000656203	0.299483	-1.73946	0.000323194	0.0644284	down	no
MSTRG.217865	TUSC1	ENST00000358022	0.607022	-0.72018	0.000332685	0.0655784	down	no
MSTRG.101943	KCNG2	ENST00000316249	0.137342	-2.86415	0.000345958	0.0674402	down	no
MSTRG.5363	HEPH	ENST00000343002;ENST00000519389;ENST00000458621;ENST00000441993;ENST00000336279	3.04183	1.60494	0.000346511	0.0674908	up	no
MSTRG.75158	PPP4R4	ENST00000304338;ENST00000328839;ENST00000553661;ENST00000556884	0.416312	-1.26426	0.000378273	0.0720833	down	no
MSTRG.21365	TAF13	ENST00000338366	0.507808	-0.977644	0.000383213	0.0727221	down	no
MSTRG.89444	CENPBD1	ENST00000314994	0.707614	-0.498966	0.000392786	0.0739263	down	no
MSTRG.107418	SHANK1	ENST00000391813;ENST00000391814;ENST00000293441	3.48504	1.80117	0.000403883	0.0754569	up	no
MSTRG.183480	ADGRF4;ADGRF2	ENST00000283303;ENST00000507065;ENST00000296862;ENST00000371220	0.0927418	-3.43064	0.000410142	0.0763151	down	no
MSTRG.123920	ERBB4	ENST00000342788;ENST00000435846;ENST00000402597;ENST00000260943	0.234365	-2.09317	0.000440821	0.0807122	down	no
MSTRG.51388	ACAD8	ENST00000281182	0.757454	-0.40077	0.000463156	0.0838708	down	no
MSTRG.108233	ZNF544;ERVK3-1;ZNF8	ENST00000627781;ENST00000600220;ENST00000597240;ENST00000594384;ENST00000596652;ENST00000427361;ENST00000413518;ENST00000652201;ENST00000599227;ENST00000596825;ENST00000595981;ENST00000269829;ENST00000621650;ENST00000596929	1.5635	0.644778	0.00046952	0.0844972	up	no
MSTRG.25700	TDRD5	ENST00000444136;ENST00000367614	0.349157	-1.51805	0.000533591	0.0927315	down	no
MSTRG.51757	KCNA1	ENST00000382545;ENST00000639680	2.38161	1.25194	0.000542562	0.0938632	up	no
MSTRG.42425	USH1C	ENST00000527720;ENST00000005226;ENST00000527020;ENST00000318024;ENST00000526181	3.85744	1.94764	0.00054326	0.0939131	up	no
MSTRG.142115	ACOX2	ENST00000302819;ENST00000474098	3.50235	1.80832	0.000571816	0.097163	up	no
MSTRG.126911	BMP2	ENST00000378827	0.639584	-0.644793	0.000572332	0.0971784	down	no
MSTRG.221511	BARX1	ENST00000253968;ENST00000401724	0.466258	-1.1008	0.000579845	0.0982356	down	no
MSTRG.32942	ARMC3	ENST00000298032;ENST00000409049	0.329547	-1.60144	0.000584513	0.0986617	down	no
MSTRG.188493	AMD1	ENST00000368877;ENST00000368885;ENST00000368882;ENST00000675380;ENST00000368876;ENST00000672937	0.599456	-0.738273	0.000591069	0.0995482	down	no
MSTRG.175865	PITX1	ENST00000265340;ENST00000506438;ENST00000502676;ENST00000507253	0.574883	-0.798661	0.000595441	0.0999167	down	no
MSTRG.134916	P2RX6	ENST00000413302;ENST00000401443	1.82779	0.870096	0.000620237	0.102373	up	no
MSTRG.77191	PGBD4	ENST00000397766	0.604649	-0.72583	0.000643429	0.104454	down	no
MSTRG.204304	ATG9B	ENST00000469530	3.12006	1.64157	0.000643452	0.104454	up	no
MSTRG.182045	IER3	ENST00000259874;ENST00000376377	0.439359	-1.18653	0.000668567	0.107529	down	no
MSTRG.33964	CREM	ENST00000460270;ENST00000429130;ENST00000474362;ENST00000489321;ENST00000348787;ENST00000374726;ENST00000345491;ENST00000488741;ENST00000361599;ENST00000337656;ENST00000344351;ENST00000474931;ENST00000494479;ENST00000495301;ENST00000468236;ENST00000374734;ENST00000488328;ENST00000487132;ENST00000473940;ENST00000356917;ENST00000374728;ENST00000354759;ENST00000374721;ENST00000469949;ENST00000490511	0.78131	-0.356033	0.000697715	0.110597	down	no
MSTRG.144054	EPHA3	ENST00000452448;ENST00000336596;ENST00000494014	3.23975	1.69588	0.000733626	0.114468	up	no
MSTRG.43704	EHF	ENST00000533754;ENST00000531794;ENST00000531728;ENST00000527935	0.290792	-1.78194	0.00076294	0.116275	down	no
MSTRG.168674	BRIX1	ENST00000336767	0.733409	-0.447311	0.000772868	0.116275	down	no
MSTRG.67502	ABCC4	ENST00000646439;ENST00000645532;ENST00000645237;ENST00000536256;ENST00000629385	0.597607	-0.742732	0.000783264	0.116275	down	no
MSTRG.220969	GAS1	ENST00000298743	0.46374	-1.10861	0.000798704	0.116275	down	no
MSTRG.55779	PDE1B	ENST00000550620;ENST00000538346;ENST00000243052	0.688768	-0.53791	0.000801136	0.116275	down	no
MSTRG.106065	EID2B	ENST00000326282	0.607059	-0.720091	0.000817043	0.116275	down	no
MSTRG.117648	GPR17	ENST00000544369	4.18603	2.06558	0.000831991	0.116275	up	no
MSTRG.11819	GABRE	ENST00000370328	4.19847	2.06986	0.000842129	0.116275	up	no
MSTRG.154023	SOD3	ENST00000382120;ENST00000598411	0.542548	-0.882179	0.000842571	0.116275	down	no
MSTRG.96084	C1QTNF1	ENST00000580474;ENST00000581774;ENST00000579760;ENST00000354124;ENST00000339142;ENST00000578229;ENST00000392445;ENST00000311661	3.53522	1.8218	0.000846852	0.116275	up	no
MSTRG.34824	OGDHL	ENST00000374103	0.0244981	-5.35118	0.000860186	0.116275	down	no
MSTRG.82454	LYSMD4	ENST00000378904;ENST00000332728;ENST00000409796	1.63915	0.71295	0.000861001	0.116275	up	no
MSTRG.62513	SHISA2	ENST00000319420	0.425125	-1.23404	0.000864162	0.116275	down	no
MSTRG.135649	XBP1	ENST00000405219;ENST00000403532;ENST00000344347;ENST00000216037	0.619028	-0.691923	0.000866689	0.116275	down	no
MSTRG.25613	RALGPS2	ENST00000367634;ENST00000415888;ENST00000367632;ENST00000367635	0.579477	-0.787177	0.000872175	0.116275	down	no
MSTRG.211704	TMEM64	ENST00000458549;ENST00000422900;ENST00000418210;ENST00000519519	0.484284	-1.04607	0.000887574	0.116275	down	no
MSTRG.180973	ID4	ENST00000378700	0.607134	-0.719913	0.000905937	0.116275	down	no
MSTRG.133392	RCAN1;KCNE1	ENST00000482533;ENST00000313806;ENST00000381132;ENST00000381135;ENST00000492600;ENST00000337385;ENST00000621601;ENST00000399272;ENST00000443408;ENST00000481448;ENST00000487990;ENST00000432085;ENST00000620920;ENST00000416357	0.516486	-0.9532	0.000948413	0.116275	down	no
MSTRG.60036	CMKLR1	ENST00000412676;ENST00000550402;ENST00000312143;ENST00000549466;ENST00000552995	1.90236	0.927793	0.000969734	0.116275	up	no
MSTRG.53619	CCDC91	ENST00000545336;ENST00000542801;ENST00000535212;ENST00000543019;ENST00000381259;ENST00000543534;ENST00000542814;ENST00000540794;ENST00000536154	0.745696	-0.423341	0.00103029	0.116275	down	no
MSTRG.182109	MICA;MICB	ENST00000616296;ENST00000538442;ENST00000673647;ENST00000399150;ENST00000421350;ENST00000449934;ENST00000674131;ENST00000252229	1.89754	0.924133	0.00103858	0.116275	up	no
MSTRG.194538	TWISTNB	ENST00000222567	0.468814	-1.09291	0.00105679	0.116275	down	no
MSTRG.87999	ZFHX3	ENST00000397992;ENST00000268489;ENST00000641206	1.88986	0.918278	0.00107423	0.116275	up	no
MSTRG.62312	SGCG	ENST00000218867	4.00848	2.00306	0.00108352	0.116275	up	no
MSTRG.150452	ZNF639	ENST00000491818;ENST00000466264;ENST00000496856;ENST00000481587;ENST00000621687;ENST00000326361;ENST00000484866;ENST00000494234	0.752602	-0.410042	0.00110363	0.116275	down	no
MSTRG.210054	XKR9	ENST00000520030;ENST00000408926	0.453793	-1.13989	0.00111565	0.116275	down	no
MSTRG.96322	CENPX	ENST00000306704;ENST00000580435;ENST00000392359;ENST00000584347;ENST00000579520;ENST00000584600	0.665704	-0.587047	0.00112169	0.116275	down	no
MSTRG.157802	SEPTIN11	ENST00000505788;ENST00000502584;ENST00000510515;ENST00000264893;ENST00000510641;ENST00000502401;ENST00000504637	2.15556	1.10807	0.00112571	0.116275	up	no
MSTRG.73974	NRXN3	ENST00000428277;ENST00000335750;ENST00000281127;ENST00000553631;ENST00000554719;ENST00000634499;ENST00000557594;ENST00000554738;ENST00000635466;ENST00000553363	3.57654	1.83857	0.00117544	0.116275	up	no
MSTRG.116305	SOWAHC	ENST00000356454	0.542661	-0.881877	0.00117975	0.116275	down	no
MSTRG.10958	FGF13	ENST00000315930;ENST00000626909;ENST00000421460;ENST00000441825;ENST00000305414;ENST00000455663;ENST00000436198	0.454165	-1.13871	0.00118988	0.116275	down	no
MSTRG.164437	TMEM192	ENST00000306480;ENST00000506087;ENST00000505095	0.719314	-0.475306	0.00119247	0.116275	down	no
MSTRG.115817	TMEM182	ENST00000640575;ENST00000409173;ENST00000639249;ENST00000412401;ENST00000454536;ENST00000486293;ENST00000409528;ENST00000488134	0.496492	-1.01016	0.00119254	0.116275	down	no
MSTRG.59391	ANKS1B	ENST00000550693;ENST00000551560;ENST00000547776;ENST00000341752;ENST00000549025;ENST00000549493;ENST00000546960;ENST00000547010;ENST00000329257;ENST00000552407;ENST00000550778;ENST00000546364;ENST00000547446;ENST00000552748	0.660238	-0.598943	0.00121491	0.116275	down	no
MSTRG.192877	WDR27;AL031315	ENST00000423258;ENST00000650296;ENST00000448612;ENST00000474018;ENST00000441385;ENST00000647873;ENST00000648086	1.80136	0.849085	0.00122976	0.116275	up	no
ENSG00000172365	OR5B2	ENST00000302581;ENST00000641342	0.016044	-5.96182	0.00124201	0.116275	down	no
MSTRG.128751	BPIFB1	ENST00000253354;ENST00000423645	0.0328422	-4.92831	0.0012439	0.116275	down	no
MSTRG.19540	COL24A1	ENST00000370571;ENST00000496682	3.10189	1.63315	0.0012468	0.116275	up	no
MSTRG.221665	CDC14B	ENST00000375241;ENST00000375242;ENST00000452280;ENST00000415608;ENST00000463569;ENST00000375240	2.14416	1.10041	0.00125217	0.116275	up	no
MSTRG.109655	RDH14;NT5C1B-RDH14;NT5C1B	ENST00000381249;ENST00000532967;ENST00000304081;ENST00000444297;ENST00000416783	0.714993	-0.483998	0.00126271	0.116275	down	no
MSTRG.61128	VPS33A;AC048338;DIABLO	ENST00000643696;ENST00000451053;ENST00000267199;ENST00000645606;ENST00000464942;ENST00000536212;ENST00000541169;ENST00000443649;ENST00000267169;ENST00000439489;ENST00000353548	0.954732	-0.0668326	0.0013112	0.116275	down	no
MSTRG.186252	UBE3D	ENST00000369747;ENST00000626828	0.778939	-0.360417	0.00133503	0.116275	down	no
MSTRG.201751	CTTNBP2	ENST00000416239;ENST00000454375;ENST00000160373;ENST00000435233	0.499618	-1.0011	0.00133744	0.116275	down	no
MSTRG.96087	ENGASE	ENST00000311595;ENST00000579016	2.15282	1.10623	0.00135335	0.116275	up	no
MSTRG.64268	EBPL	ENST00000378270;ENST00000378268;ENST00000378272;ENST00000242827;ENST00000378284	0.74705	-0.420724	0.00139004	0.116275	down	no
MSTRG.212837	DCAF13	ENST00000519682;ENST00000616836;ENST00000612750;ENST00000521971	0.771179	-0.374862	0.00139553	0.116275	down	no
MSTRG.66261	SLAIN1	ENST00000418532;ENST00000314070;ENST00000267219;ENST00000481614;ENST00000496045;ENST00000351546;ENST00000488699;ENST00000442759;ENST00000446759;ENST00000466548;ENST00000377236	0.518987	-0.94623	0.00140146	0.116275	down	no
MSTRG.129674	WFDC2	ENST00000372676;ENST00000342873;ENST00000217425	0.136266	-2.8755	0.00140365	0.116275	down	no
MSTRG.182461	SCUBE3	ENST00000274938	2.39068	1.25742	0.00140627	0.116275	up	no
MSTRG.28050	SLC30A1	ENST00000367001	0.482193	-1.05232	0.00142497	0.116275	down	no
MSTRG.140598	TTC21A	ENST00000431162;ENST00000440121	2.22802	1.15576	0.00144572	0.116275	up	no
MSTRG.36193	COL13A1	ENST00000517713;ENST00000398978;ENST00000674050;ENST00000645393;ENST00000354547;ENST00000357811;ENST00000673802;ENST00000522165;ENST00000673768;ENST00000398975;ENST00000673931;ENST00000673850;ENST00000456019;ENST00000520133	3.12647	1.64453	0.0014475	0.116275	up	no
MSTRG.192130	SOD2	ENST00000538183;ENST00000401980;ENST00000337404;ENST00000367055;ENST00000444946;ENST00000367054;ENST00000545162;ENST00000546087;ENST00000452684;ENST00000535561	0.381423	-1.39054	0.00145872	0.116275	down	no
MSTRG.79427	MYO1E	ENST00000288235;ENST00000560749	1.99808	0.998614	0.00146722	0.116275	up	no
MSTRG.23251	THEM5	ENST00000368817	0.540229	-0.888356	0.00147141	0.116275	down	no
MSTRG.6967	POF1B	ENST00000262753;ENST00000373145	0.333451	-1.58446	0.00147308	0.116275	down	no
MSTRG.38659	WBP1L	ENST00000448841;ENST00000369889	1.62801	0.703111	0.00153146	0.116275	up	no
MSTRG.38354	CNNM1	ENST00000356713	0.444058	-1.17118	0.00158496	0.116275	down	no
MSTRG.122936	COQ10B	ENST00000263960;ENST00000409398;ENST00000409010	0.610654	-0.711572	0.00160504	0.116275	down	no
MSTRG.106054	PLEKHG2;ZFP36	ENST00000595920;ENST00000597629;ENST00000458508;ENST00000409797;ENST00000451354;ENST00000425673	2.36618	1.24256	0.00161871	0.116275	up	no
MSTRG.966	FRMPD4	ENST00000656302;ENST00000672010;ENST00000675598;ENST00000380682;ENST00000672869;ENST00000616992	2.80275	1.48685	0.00161963	0.116275	up	no
MSTRG.87338	KIAA0895L	ENST00000561621;ENST00000568563;ENST00000290881;ENST00000563902	2.02512	1.01801	0.00164175	0.116275	up	no
MSTRG.27658	IL19	ENST00000659997;ENST00000270218	0.47251	-1.08158	0.00167011	0.116275	down	no
MSTRG.149039	SHOX2	ENST00000389589;ENST00000483851;ENST00000441443;ENST00000554685	1.9687	0.977243	0.0016742	0.116275	up	no
MSTRG.98361	B4GALT6	ENST00000383131;ENST00000306851;ENST00000237019;ENST00000579372	0.3711	-1.43012	0.00167641	0.116275	down	no
MSTRG.95096	PSMD12	ENST00000356126	0.8195	-0.287184	0.00172296	0.116275	down	no
MSTRG.9353	CXorf56	ENST00000320339;ENST00000644802	0.568225	-0.815466	0.00172697	0.116275	down	no
MSTRG.25361	TNR	ENST00000367674	0.355884	-1.49052	0.00175395	0.116275	down	no
MSTRG.14632	MED18	ENST00000373842	0.49876	-1.00358	0.00175852	0.116275	down	no
MSTRG.106920	PNMA8A	ENST00000313683;ENST00000438932	0.481954	-1.05303	0.00177941	0.116275	down	no
MSTRG.55701	ATF7	ENST00000548446;ENST00000591397;ENST00000420353;ENST00000456903;ENST00000588078;ENST00000548118	1.60183	0.679717	0.00177985	0.116275	up	no
MSTRG.39495	PLEKHS1	ENST00000354462;ENST00000361048;ENST00000369310;ENST00000652564;ENST00000369312;ENST00000650852	4.16866	2.05959	0.00178398	0.116275	up	no
MSTRG.163728	LRAT	ENST00000507827;ENST00000502525	0.10062	-3.31301	0.00178761	0.116275	down	no
MSTRG.81240	WHAMM	ENST00000286760	0.80495	-0.31303	0.00179273	0.116275	down	no
MSTRG.133369	CLIC6	ENST00000349499;ENST00000360731	0.44526	-1.16728	0.00179351	0.116275	down	no
MSTRG.149266	B3GALNT1	ENST00000651380;ENST00000652377;ENST00000392779;ENST00000652032;ENST00000651117;ENST00000652593;ENST00000651916;ENST00000488170;ENST00000652730;ENST00000651460;ENST00000320474;ENST00000651791;ENST00000651292;ENST00000651801;ENST00000476999;ENST00000650695;ENST00000651686;ENST00000651379;ENST00000652111;ENST00000651430;ENST00000651305;ENST00000473142;ENST00000652309;ENST00000651689;ENST00000651509…	0.554694	-0.850236	0.0017945	0.116275	down	no
MSTRG.212787	DPYS	ENST00000351513;ENST00000521573	0.180806	-2.46749	0.00181457	0.116275	down	no
MSTRG.7501	FAM133A	ENST00000322139;ENST00000332647	0.40919	-1.28916	0.00181539	0.116275	down	no
MSTRG.64383	SPRYD7	ENST00000361840;ENST00000378195	0.5806	-0.784383	0.00183451	0.116275	down	no
MSTRG.11758	VMA21	ENST00000370361;ENST00000330374	0.489168	-1.0316	0.00183666	0.116275	down	no
MSTRG.97377	SEH1L	ENST00000262124;ENST00000587761;ENST00000585730;ENST00000592170	0.820211	-0.285933	0.00183774	0.116275	down	no
MSTRG.55621	IGFBP6	ENST00000301464;ENST00000650247;ENST00000548547	0.655441	-0.609463	0.00184066	0.116275	down	no
MSTRG.139503	NR1D2	ENST00000312521	0.562877	-0.829108	0.00184757	0.116275	down	no
MSTRG.178745	FGF18;AC093246	ENST00000274625;ENST00000675071	0.512713	-0.963776	0.00187647	0.116275	down	no
MSTRG.181928	HLA-G	ENST00000360323;ENST00000428701;ENST00000376828	0.359068	-1.47767	0.00189438	0.116275	down	no
MSTRG.150863	C3orf70	ENST00000335012	0.424889	-1.23484	0.00191206	0.116275	down	no
MSTRG.128933	GDF5	ENST00000374372;ENST00000374369	0.377423	-1.40574	0.00193852	0.116275	down	no
MSTRG.201084	SLC26A4	ENST00000644269;ENST00000440056	0.45562	-1.1341	0.00195565	0.116275	down	no
MSTRG.146384	SLC12A8	ENST00000469902;ENST00000462437;ENST00000430155;ENST00000479826;ENST00000393469	2.88318	1.52766	0.00198117	0.116275	up	no
MSTRG.150746	B3GNT5;KLHL24	ENST00000460419;ENST00000476808;ENST00000464923;ENST00000454495;ENST00000493074;ENST00000468101;ENST00000326505;ENST00000473045;ENST00000482138;ENST00000437402;ENST00000468001;ENST00000454652;ENST00000242810	0.704435	-0.505462	0.00200001	0.116275	down	no
MSTRG.125837	AGAP1	ENST00000619456;ENST00000409457;ENST00000304032;ENST00000336665;ENST00000614409;ENST00000409538;ENST00000428334	1.74983	0.807215	0.00201743	0.116275	up	no
MSTRG.13974	ALPL	ENST00000540617;ENST00000374832;ENST00000374840;ENST00000374830	7.08395	2.82455	0.00205073	0.116275	up	no
MSTRG.90376	USP43	ENST00000573955;ENST00000285199	0.414951	-1.26899	0.00208738	0.116275	down	no
MSTRG.26009	LAMC2	ENST00000264144;ENST00000493293	0.475042	-1.07387	0.00213239	0.116275	down	no
MSTRG.158833	PYURF;PIGY	ENST00000273968;ENST00000527353	0.500407	-0.998826	0.00214641	0.116275	down	no
MSTRG.89368	GALNS;APRT	ENST00000268695;ENST00000569616;ENST00000562831;ENST00000378364;ENST00000563655;ENST00000426324;ENST00000568311;ENST00000569433	1.92454	0.944517	0.0021588	0.116275	up	no
MSTRG.150760	YEATS2	ENST00000432781;ENST00000305135	1.66888	0.738882	0.00216145	0.116275	up	no
MSTRG.158603	HERC5	ENST00000264350	0.730373	-0.453296	0.00218778	0.116275	down	no
MSTRG.140701	ENTPD3	ENST00000439533;ENST00000301825;ENST00000445129;ENST00000456402	1.76654	0.820929	0.00219308	0.116275	up	no
MSTRG.121047	WIPF1	ENST00000409891;ENST00000392547;ENST00000410117;ENST00000272746;ENST00000409415;ENST00000359761	1.9625	0.972692	0.00219336	0.116275	up	no
MSTRG.206263	ZDHHC2	ENST00000523132;ENST00000522184;ENST00000262096	0.481404	-1.05468	0.00219542	0.116275	down	no
MSTRG.90318	GLP2R	ENST00000262441;ENST00000304773	0.409912	-1.28661	0.0022079	0.116275	down	no
MSTRG.38602	HPS6	ENST00000299238	0.709112	-0.495915	0.00224591	0.116275	down	no
MSTRG.87532	CDH3	ENST00000429102;ENST00000264012;ENST00000568292	0.401443	-1.31673	0.00225537	0.116275	down	no
MSTRG.66383	POU4F1	ENST00000377208	0.023389	-5.41803	0.00226022	0.116275	down	no
MSTRG.12083	F8A2	ENST00000369505	0.606031	-0.722537	0.00228312	0.116275	down	no
MSTRG.14673	GMEB1	ENST00000373816;ENST00000361872;ENST00000294409	0.946275	-0.0796693	0.00231479	0.116275	down	no
MSTRG.5995	NEXMIF	ENST00000642681;ENST00000055682	0.580179	-0.785429	0.00232805	0.116275	down	no
MSTRG.57236	RAB3IP;MYRFL	ENST00000551641;ENST00000550536;ENST00000552032;ENST00000526994;ENST00000547055;ENST00000549760;ENST00000299350;ENST00000247833;ENST00000378815	0.718727	-0.476483	0.00233695	0.116275	down	no
MSTRG.165231	WDR17	ENST00000508596;ENST00000280190	0.616871	-0.696959	0.00233726	0.116275	down	no
MSTRG.152682	BLOC1S4	ENST00000320776	0.642052	-0.639239	0.00236709	0.116275	down	no
MSTRG.155054	SMIM14	ENST00000295958;ENST00000505729;ENST00000511809	0.57716	-0.792956	0.00238871	0.116275	down	no
MSTRG.183442	ADGRF1	ENST00000371253	0.0586633	-4.0914	0.00239507	0.116275	down	no
MSTRG.68606	ING1	ENST00000333219;ENST00000375774;ENST00000338450	0.870045	-0.200837	0.00242163	0.116275	down	no
MSTRG.18331	ERICH3	ENST00000326665;ENST00000420661	0.466543	-1.09992	0.00242818	0.116275	down	no
MSTRG.89712	METTL16	ENST00000263092;ENST00000576976	0.790703	-0.338792	0.00242964	0.116275	down	no
MSTRG.19433	SSX2IP	ENST00000437941;ENST00000422026;ENST00000342203;ENST00000603677	0.633461	-0.658672	0.00249202	0.116275	down	no
MSTRG.36885	PLAC9	ENST00000372263;ENST00000372270	0.661462	-0.59627	0.00250815	0.116275	down	no
MSTRG.165246	SPCS3	ENST00000503362	0.548877	-0.865444	0.00250907	0.116275	down	no
MSTRG.160553	AP1AR	ENST00000309703;ENST00000512741;ENST00000274000	0.661431	-0.596338	0.00252493	0.116275	down	no
MSTRG.189534	RNF217	ENST00000521654;ENST00000560949	0.696876	-0.521027	0.00257214	0.116275	down	no
MSTRG.77856	BMF	ENST00000397573;ENST00000561360;ENST00000354670;ENST00000560430;ENST00000558774;ENST00000561282;ENST00000559701;ENST00000431415	2.02578	1.01848	0.0026085	0.116275	up	no
MSTRG.55034	VDR	ENST00000550314;ENST00000550325;ENST00000395324;ENST00000546653;ENST00000548664;ENST00000229022;ENST00000549336	2.22774	1.15558	0.00260947	0.116275	up	no
MSTRG.201077	GPR22	ENST00000304402	0.65656	-0.607	0.00261348	0.116275	down	no
MSTRG.60097	ACACB	ENST00000539864;ENST00000377848;ENST00000377854;ENST00000544726;ENST00000338432	1.8254	0.86821	0.00261633	0.116275	up	no
MSTRG.148482	CLRN1;MINDY4B	ENST00000327047;ENST00000465419;ENST00000328863;ENST00000295911	0.332901	-1.58683	0.00262554	0.116275	down	no
MSTRG.78074	STARD9	ENST00000290607	2.25784	1.17494	0.0026456	0.116275	up	no
MSTRG.42426	SAA2;SAA4	ENST00000256733;ENST00000414546;ENST00000528349;ENST00000278222;ENST00000529528;ENST00000530400;ENST00000526900	0.0549503	-4.18573	0.00265857	0.116275	down	no
MSTRG.58402	LRRIQ1	ENST00000393217;ENST00000526363	0.223136	-2.16401	0.00265959	0.116275	down	no
MSTRG.91784	TIAF1;MYO18A	ENST00000359450;ENST00000636100;ENST00000531253;ENST00000527372	1.91646	0.938441	0.00266492	0.116275	up	no
MSTRG.210323	GDAP1	ENST00000676207;ENST00000676443;ENST00000675376;ENST00000675999;ENST00000220822;ENST00000676143;ENST00000674710;ENST00000675821	0.679172	-0.558152	0.00267523	0.116275	down	no
MSTRG.129000	ROMO1	ENST00000374078;ENST00000336695;ENST00000374077;ENST00000374072	0.374172	-1.41822	0.00268802	0.116275	down	no
MSTRG.87363	SLC9A5	ENST00000299798;ENST00000566345;ENST00000567247	2.12852	1.08985	0.00268849	0.116275	up	no
MSTRG.147803	PLS1	ENST00000497002;ENST00000337777;ENST00000483373;ENST00000461644;ENST00000457734	0.593376	-0.752982	0.002699	0.116275	down	no
MSTRG.141195	MYL3	ENST00000395869;ENST00000292327;ENST00000654597;ENST00000653454;ENST00000431168;ENST00000662933	1.98409	0.98848	0.00270565	0.116275	up	no
MSTRG.84325	GPRC5B	ENST00000300571;ENST00000569479;ENST00000566822;ENST00000564449;ENST00000562469;ENST00000569847;ENST00000568214	0.411865	-1.27976	0.00271262	0.116275	down	no
MSTRG.132114	C21orf91	ENST00000284881;ENST00000405964;ENST00000400559;ENST00000400558	0.50854	-0.975567	0.00276453	0.116275	down	no
MSTRG.71644	KLHDC2	ENST00000298307	0.847526	-0.238671	0.00280518	0.116275	down	no
MSTRG.121745	NUP35	ENST00000409798;ENST00000295119;ENST00000442895	0.817647	-0.29045	0.00285347	0.116275	down	no
MSTRG.143164	GPR27	ENST00000304411	0.397024	-1.3327	0.00291495	0.116275	down	no
MSTRG.64006	RUBCNL	ENST00000675992;ENST00000676307;ENST00000378781;ENST00000417405;ENST00000676114;ENST00000409879;ENST00000378797;ENST00000631139;ENST00000378784;ENST00000378787;ENST00000389908;ENST00000675585;ENST00000429979	1.97688	0.983227	0.00294379	0.116275	up	no
MSTRG.192042	SYTL3	ENST00000367081;ENST00000611299	2.0514	1.03661	0.00298788	0.116275	up	no
MSTRG.205398	DEFB1	ENST00000297439	6.87549	2.78146	0.00299179	0.116275	up	no
MSTRG.102061	FSTL3	ENST00000166139;ENST00000589185;ENST00000592947;ENST00000605925;ENST00000591573	0.634912	-0.655372	0.00300025	0.116275	down	no
MSTRG.105839	SPINT2;C19orf33;AC011479	ENST00000587334;ENST00000454580;ENST00000301244;ENST00000301246;ENST00000587519;ENST00000587516;ENST00000590738;ENST00000587090;ENST00000592007;ENST00000590510;ENST00000588605;ENST00000591889	0.457989	-1.12662	0.00301987	0.116275	down	no
MSTRG.126222	NEU4	ENST00000407683;ENST00000415936;ENST00000423583;ENST00000391969;ENST00000404257;ENST00000435934;ENST00000428592	0.319385	-1.64663	0.00303376	0.116275	down	no
MSTRG.45082	OR5B12	ENST00000641921;ENST00000302572	0.0325626	-4.94064	0.00305794	0.116275	down	no
MSTRG.175319	SLC12A2	ENST00000343225;ENST00000262461;ENST00000628403	0.695671	-0.523523	0.0030632	0.116275	down	no
MSTRG.105833	ZNF875	ENST00000585623;ENST00000586897;ENST00000591417;ENST00000652615;ENST00000590166;ENST00000541583;ENST00000591391;ENST00000591471;ENST00000589392;ENST00000592168;ENST00000589188;ENST00000591259;ENST00000590582;ENST00000392153;ENST00000544914;ENST00000592768;ENST00000591134	1.59267	0.671448	0.00306798	0.116275	up	no
MSTRG.144554	COL8A1	ENST00000452013;ENST00000273342;ENST00000652472;ENST00000621757;ENST00000261037	3.48805	1.80242	0.00309542	0.116275	up	no
MSTRG.50831	ST3GAL4	ENST00000528858;ENST00000534457;ENST00000526311;ENST00000449406;ENST00000526727;ENST00000532243;ENST00000534083;ENST00000356132;ENST00000534452;ENST00000524860;ENST00000530591;ENST00000444328;ENST00000227495	2.34848	1.23173	0.00310717	0.116275	up	no
MSTRG.128136	NXT1	ENST00000254998	0.687046	-0.541521	0.00318223	0.116275	down	no
MSTRG.103061	MUC16	ENST00000397910	0.230239	-2.1188	0.00318342	0.116275	down	no
MSTRG.102682	KDM4B	ENST00000381759;ENST00000536461;ENST00000159111;ENST00000611640;ENST00000588337	1.71023	0.774193	0.00320888	0.116275	up	no
MSTRG.49336	FDX1	ENST00000260270	0.669967	-0.577839	0.00321396	0.116275	down	no
MSTRG.18611	LRRIQ3	ENST00000354431;ENST00000370911;ENST00000395089	0.281626	-1.82815	0.0032404	0.116275	down	no
MSTRG.190536	HEBP2	ENST00000448741;ENST00000607197;ENST00000367697	0.813915	-0.29705	0.0032673	0.116275	down	no
MSTRG.195329	ADCYAP1R1	ENST00000409363;ENST00000304166;ENST00000614107;ENST00000409489;ENST00000431811	0.624205	-0.679908	0.00327379	0.116275	down	no
MSTRG.200511	IFT22	ENST00000315322;ENST00000498704;ENST00000517481;ENST00000437644;ENST00000621899	0.799192	-0.323385	0.00327981	0.116275	down	no
MSTRG.32707	MALRD1	ENST00000454679;ENST00000377266;ENST00000377265;ENST00000418367	0.62495	-0.678186	0.00328666	0.116275	down	no
MSTRG.180171	BMP6	ENST00000283147	0.595631	-0.747509	0.00330769	0.116275	down	no
MSTRG.23039	MRPS21	ENST00000581066;ENST00000614145	0.844796	-0.243325	0.0033115	0.116275	down	no
MSTRG.159904	CISD2	ENST00000273986;ENST00000503643	0.454717	-1.13696	0.00333584	0.116275	down	no
MSTRG.187918	BVES	ENST00000314641;ENST00000446408;ENST00000336775	0.477722	-1.06576	0.00336691	0.116275	down	no
MSTRG.37158	CDHR1	ENST00000623527;ENST00000332904	0.355225	-1.49319	0.00341604	0.116275	down	no
MSTRG.218331	TAF1L	ENST00000242310	0.192301	-2.37856	0.00342765	0.116275	down	no
MSTRG.46802	WNT11	ENST00000322563;ENST00000529461	2.66065	1.41178	0.00343303	0.116275	up	no
MSTRG.21414	GPSM2	ENST00000674700;ENST00000435475;ENST00000645164;ENST00000264126;ENST00000643643;ENST00000441735;ENST00000406462;ENST00000645255;ENST00000643094;ENST00000446797;ENST00000675087;ENST00000674914;ENST00000435987	1.92825	0.947293	0.0034376	0.116275	up	no
MSTRG.158651	SNCA	ENST00000394991;ENST00000420646;ENST00000673902;ENST00000502987;ENST00000673718;ENST00000394986;ENST00000618500;ENST00000674129;ENST00000345009	0.549418	-0.864024	0.00344064	0.116275	down	no
MSTRG.221564	PTCH1	ENST00000430669;ENST00000375271;ENST00000437951;ENST00000429896;ENST00000468211;ENST00000331920;ENST00000551630;ENST00000553011;ENST00000548420;ENST00000418258	2.62655	1.39317	0.0034511	0.116275	up	no
MSTRG.129578	FITM2	ENST00000396825	0.715296	-0.483389	0.00351161	0.116275	down	no
MSTRG.20019	HFM1	ENST00000370425;ENST00000455133;ENST00000448819;ENST00000430465	0.466847	-1.09898	0.00351233	0.116275	down	no
MSTRG.75080	GON7	ENST00000306954	0.620769	-0.687872	0.00352651	0.116275	down	no
MSTRG.108501	MYT1L	ENST00000649810;ENST00000471668;ENST00000485348;ENST00000648366;ENST00000649741;ENST00000648339	0.160564	-2.63878	0.0035393	0.116275	down	no
MSTRG.29770	FAM89A	ENST00000366654	0.51523	-0.956711	0.00354546	0.116275	down	no
MSTRG.79290	GCOM1;POLR2M;MYZAP	ENST00000649429;ENST00000649091;ENST00000461709;ENST00000380569;ENST00000380557;ENST00000587652;ENST00000569089;ENST00000299638;ENST00000267853	0.597422	-0.743177	0.00355761	0.116275	down	no
MSTRG.146318	PDIA5;SEC22A	ENST00000484644;ENST00000316218;ENST00000309934;ENST00000492595;ENST00000466519;ENST00000491366;ENST00000473494;ENST00000480631;ENST00000487572	1.56439	0.645597	0.00356427	0.116275	up	no
MSTRG.108694	SOX11	ENST00000322002	0.572219	-0.805361	0.00359708	0.116275	down	no
MSTRG.5803	NHSL2	ENST00000639939;ENST00000632230;ENST00000510661;ENST00000631375;ENST00000633930	2.8827	1.52742	0.00360022	0.116275	up	no
ENSG00000128714	HOXD13	ENST00000392539	0.0645105	-3.95432	0.00361951	0.116275	down	no
MSTRG.181792	ZBED9	ENST00000452236;ENST00000646382	0.365696	-1.45128	0.00362977	0.116275	down	no
MSTRG.79634	TPM1	ENST00000610733;ENST00000288398;ENST00000651577;ENST00000560959;ENST00000334895;ENST00000559281;ENST00000404484;ENST00000559556;ENST00000403994;ENST00000651704;ENST00000317516;ENST00000558910;ENST00000561266;ENST00000560615;ENST00000559397;ENST00000358278;ENST00000267996;ENST00000560970	2.23682	1.16145	0.0036326	0.116275	up	no
MSTRG.168673	RAD1	ENST00000382038;ENST00000341754;ENST00000628399	0.756918	-0.401792	0.00363309	0.116275	down	no
MSTRG.12803	PLEKHG5;TNFRSF25	ENST00000675123;ENST00000675093;ENST00000377748;ENST00000675976;ENST00000351959;ENST00000537245;ENST00000340850;ENST00000647810;ENST00000377732;ENST00000481401;ENST00000673471;ENST00000356876;ENST00000377740;ENST00000400915;ENST00000400913;ENST00000535355;ENST00000675812	2.47915	1.30984	0.00365319	0.116275	up	no
MSTRG.131212	SLC17A9	ENST00000411611;ENST00000370351;ENST00000370349	1.83092	0.872565	0.00365927	0.116275	up	no
MSTRG.168484	MTMR12	ENST00000382142;ENST00000264934;ENST00000280285	0.808561	-0.306572	0.0036612	0.116275	down	no
MSTRG.184833	ADGRB3	ENST00000370598;ENST00000546190;ENST00000238918;ENST00000604969;ENST00000603207	4.74635	2.24682	0.00366875	0.116275	up	no
MSTRG.214586	TRIB1	ENST00000311922;ENST00000519576;ENST00000520847	0.589133	-0.763334	0.00367138	0.116275	down	no
MSTRG.103587	GADD45GIP1	ENST00000316939	0.635134	-0.654866	0.00367146	0.116275	down	no
MSTRG.178857	SH3PXD2B	ENST00000636523;ENST00000311601	2.60925	1.38363	0.0037119	0.116275	up	no
MSTRG.72881	HSPA2;PPP1R36	ENST00000247207;ENST00000298705	0.681035	-0.554199	0.00372536	0.116275	down	no
MSTRG.206599	PHYHIP	ENST00000321613;ENST00000523252;ENST00000454243	0.628357	-0.670343	0.00372842	0.116275	down	no
MSTRG.122193	GULP1	ENST00000410051;ENST00000451191;ENST00000409843;ENST00000409637;ENST00000409927;ENST00000409609;ENST00000409580;ENST00000359135;ENST00000409830;ENST00000433052	0.565783	-0.821679	0.00372847	0.116275	down	no
MSTRG.85786	MYLK3	ENST00000394809;ENST00000536476	0.583193	-0.777955	0.00373025	0.116275	down	no
MSTRG.170958	MARVELD2	ENST00000325631;ENST00000515844;ENST00000647531;ENST00000512803	0.581123	-0.783084	0.00374464	0.116275	down	no
MSTRG.51905	CD4	ENST00000539492;ENST00000011653	2.08468	1.05983	0.00375653	0.116275	up	no
MSTRG.71990	GCH1	ENST00000543643;ENST00000536224	0.573916	-0.801088	0.00379106	0.116275	down	no
MSTRG.187350	NDUFAF4	ENST00000316149	0.647927	-0.626096	0.00379151	0.116275	down	no
MSTRG.142063	PDE12	ENST00000487257;ENST00000311180	0.700869	-0.512784	0.00384547	0.116275	down	no
MSTRG.129635	KCNK15	ENST00000372861	0.534808	-0.902908	0.00386408	0.116275	down	no
MSTRG.55362	METTL7A	ENST00000332160;ENST00000550502;ENST00000548553	0.597327	-0.743407	0.00387837	0.116275	down	no
MSTRG.41066	LSP1;TNNT3	ENST00000421485;ENST00000451814;ENST00000381775;ENST00000417766;ENST00000381589;ENST00000406638;ENST00000429923;ENST00000432093;ENST00000676039;ENST00000311604;ENST00000405957;ENST00000344578;ENST00000381579;ENST00000612798;ENST00000446808;ENST00000641787;ENST00000418975;ENST00000278317;ENST00000457279;ENST00000641119;ENST00000641225;ENST00000381558;ENST00000381563	2.02928	1.02097	0.0039045	0.116275	up	no
MSTRG.61253	GTF2H3	ENST00000618160;ENST00000543341;ENST00000536375;ENST00000538845;ENST00000539994;ENST00000228955	0.636572	-0.651603	0.00390981	0.116275	down	no
MSTRG.178164	NUDCD2	ENST00000302764	0.676305	-0.564254	0.0039477	0.116275	down	no
MSTRG.170309	SMIM15	ENST00000339020	0.428936	-1.22117	0.00396518	0.116275	down	no
MSTRG.60327	TMEM116	ENST00000552374;ENST00000550233;ENST00000550037;ENST00000550831;ENST00000550800;ENST00000355445;ENST00000549537;ENST00000549425;ENST00000546962	0.730521	-0.453003	0.00400183	0.116275	down	no
MSTRG.27252	TIMM17A	ENST00000367287	0.753827	-0.407694	0.00400629	0.116275	down	no
MSTRG.80975	ADAMTS7	ENST00000388820	2.96526	1.56816	0.00400717	0.116275	up	no
MSTRG.157534	MTHFD2L	ENST00000325278;ENST00000395759;ENST00000359107	0.729075	-0.45586	0.00402815	0.116275	down	no
MSTRG.221396	SUSD3	ENST00000375472;ENST00000465709;ENST00000375469;ENST00000471462;ENST00000617293	0.358643	-1.47938	0.00405178	0.116275	down	no
MSTRG.89390	ZNF778	ENST00000564906;ENST00000433976	0.848772	-0.236551	0.00406265	0.116275	down	no
MSTRG.9404	NKAP	ENST00000371410	0.75257	-0.410101	0.00407089	0.116275	down	no
MSTRG.44342	C11orf96	ENST00000617612;ENST00000339446	0.707055	-0.500106	0.00410676	0.116275	down	no
MSTRG.180491	TMEM170B	ENST00000379426	0.648686	-0.624407	0.00410799	0.116275	down	no
MSTRG.152501	CYTL1	ENST00000307746;ENST00000509419;ENST00000506508	0.271426	-1.88137	0.0041844	0.116275	down	no
MSTRG.114696	KCMF1	ENST00000456682;ENST00000428691;ENST00000409785;ENST00000453448	0.744616	-0.425431	0.00418443	0.116275	down	no
MSTRG.106034	FBXO27	ENST00000292853;ENST00000600828;ENST00000509137	0.635131	-0.654874	0.00419867	0.116275	down	no
MSTRG.208972	RPS20	ENST00000618656;ENST00000518875;ENST00000521262;ENST00000524349;ENST00000519606;ENST00000523936;ENST00000009589	0.58419	-0.775489	0.00423681	0.116275	down	no
MSTRG.14116	FUCA1	ENST00000374479	0.585566	-0.772097	0.00423804	0.116275	down	no
MSTRG.218411	BAG1	ENST00000473781;ENST00000379704;ENST00000634734;ENST00000488499;ENST00000635077;ENST00000473464	0.779245	-0.35985	0.00424807	0.116275	down	no
MSTRG.27240	NAV1;IPO9	ENST00000593583;ENST00000367296;ENST00000367302;ENST00000361565;ENST00000367295;ENST00000430015;ENST00000438083	1.8053	0.852235	0.00431528	0.116275	up	no
MSTRG.124904	ACSL3	ENST00000357430;ENST00000540115;ENST00000535678;ENST00000413316;ENST00000392066	0.595674	-0.747406	0.0043791	0.116275	down	no
MSTRG.191172	ADGB	ENST00000397944;ENST00000367489;ENST00000473647;ENST00000326916	0.204049	-2.29301	0.0043889	0.116275	down	no
MSTRG.198411	BCL7B	ENST00000223368;ENST00000411832;ENST00000455335	0.946655	-0.0790897	0.00438935	0.116275	down	no
MSTRG.50392	UBASH3B	ENST00000284273	0.60764	-0.718711	0.00440542	0.116275	down	no
MSTRG.41649	OLFML1	ENST00000329293;ENST00000530135	2.57769	1.36608	0.00443148	0.116275	up	no
MSTRG.210009	SULF1	ENST00000529134;ENST00000616868;ENST00000525061;ENST00000528783;ENST00000419716;ENST00000402687;ENST00000525999;ENST00000260128;ENST00000534179;ENST00000458141	2.20454	1.14048	0.00443561	0.116275	up	no
MSTRG.76496	NDN	ENST00000649030	0.423158	-1.24073	0.00445692	0.116275	down	no
MSTRG.221468	FAM120AOS	ENST00000423591;ENST00000375412;ENST00000428378	0.892841	-0.163525	0.00446163	0.116275	down	no
MSTRG.176199	PAIP2	ENST00000394795;ENST00000265192;ENST00000507755	0.473471	-1.07865	0.00446436	0.116275	down	no
MSTRG.171175	FOXD1	ENST00000615637	0.548458	-0.866547	0.00446848	0.116275	down	no
MSTRG.188853	TSPYL1	ENST00000368608	0.727608	-0.458767	0.00446905	0.116275	down	no
MSTRG.108102	ZIM2;PEG3	ENST00000593931;ENST00000600833;ENST00000649428;ENST00000649233;ENST00000326441;ENST00000649680;ENST00000649735;ENST00000650102;ENST00000594389;ENST00000647621;ENST00000650632;ENST00000593711;ENST00000649876;ENST00000598410;ENST00000647852;ENST00000648694;ENST00000629319;ENST00000599534	0.559997	-0.83651	0.00447519	0.116275	down	no
MSTRG.157263	ODAM	ENST00000396094	0.00135973	-9.52247	0.00448117	0.116275	down	no
MSTRG.36335	DDIT4	ENST00000307365	2.8566	1.5143	0.00455505	0.116275	up	no
MSTRG.64122	SUCLA2	ENST00000643246;ENST00000643023;ENST00000493152;ENST00000646932;ENST00000646804;ENST00000434484;ENST00000642944;ENST00000646602;ENST00000644338;ENST00000470760	0.788304	-0.343176	0.00458051	0.116275	down	no
MSTRG.35396	MRLN	ENST00000628562;ENST00000414264;ENST00000599605	0.125167	-2.99808	0.00458736	0.116275	down	no
MSTRG.82649	RGS11	ENST00000397770;ENST00000316163	2.83587	1.50379	0.00459327	0.116275	up	no
MSTRG.147375	MSL2	ENST00000309993;ENST00000491050;ENST00000481989;ENST00000434835;ENST00000473093	0.912193	-0.132589	0.00460745	0.116275	down	no
MSTRG.152709	TADA2B	ENST00000512388;ENST00000310074;ENST00000515646;ENST00000510704;ENST00000506692	0.897642	-0.155788	0.00462101	0.116275	down	no
MSTRG.147507	DBR1	ENST00000260803	0.67209	-0.573274	0.00466563	0.116275	down	no
MSTRG.14504	MAP3K6	ENST00000357582;ENST00000486046;ENST00000374040	1.71337	0.776837	0.00466934	0.116275	up	no
MSTRG.181631	PRSS16	ENST00000230582	0.175522	-2.51028	0.00467925	0.116275	down	no
MSTRG.113343	CEP68	ENST00000377990	1.5415	0.624332	0.00468172	0.116275	up	no
MSTRG.194933	OSBPL3	ENST00000415952;ENST00000396431;ENST00000396429;ENST00000409069;ENST00000313367	2.1184	1.08298	0.00469446	0.116275	up	no
MSTRG.177510	SAP30L	ENST00000297109;ENST00000440364	0.77923	-0.359878	0.00472244	0.116275	down	no
MSTRG.79435	FAM81A	ENST00000288228;ENST00000561361;ENST00000559628;ENST00000558348;ENST00000560123;ENST00000560087;ENST00000560394	2.47974	1.31019	0.004727	0.116275	up	no
MSTRG.4324	GPR173	ENST00000332582;ENST00000375466	1.86592	0.899885	0.00476453	0.116275	up	no
MSTRG.148290	GYG1	ENST00000345003;ENST00000492285;ENST00000627418;ENST00000296048;ENST00000484197;ENST00000461191;ENST00000473005	0.515731	-0.955309	0.00477262	0.116275	down	no
MSTRG.115617	LONRF2	ENST00000393437;ENST00000409647	0.543052	-0.880837	0.00479385	0.116275	down	no
MSTRG.177159	CAMK2A	ENST00000672396;ENST00000672752;ENST00000672479;ENST00000510347;ENST00000348628;ENST00000671881	2.11069	1.07771	0.00479566	0.116275	up	no
MSTRG.205221	CSMD1	ENST00000602723;ENST00000335551;ENST00000635120	0.585292	-0.772771	0.00480522	0.116275	down	no
MSTRG.66420	NDFIP2	ENST00000612570;ENST00000218652;ENST00000487865;ENST00000620924	0.476072	-1.07075	0.00481124	0.116275	down	no
MSTRG.89512	DOC2B	ENST00000613549	0.65665	-0.606803	0.004828	0.116275	down	no
MSTRG.15361	EVA1B	ENST00000270824	0.419952	-1.2517	0.00484655	0.116275	down	no
MSTRG.53232	PYROXD1	ENST00000538582;ENST00000240651	0.530968	-0.913303	0.00491968	0.116275	down	no
MSTRG.76812	NSMCE3	ENST00000332303	0.776908	-0.364184	0.00493413	0.116275	down	no
MSTRG.93012	KLHL11	ENST00000319121	0.731767	-0.450543	0.00495101	0.116275	down	no
MSTRG.38694	BORCS7;AS3MT	ENST00000339834;ENST00000369883;ENST00000369880	0.690161	-0.534995	0.00495516	0.116275	down	no
MSTRG.88360	VAT1L	ENST00000302536	3.11986	1.64148	0.00496637	0.116275	up	no
MSTRG.59750	TXNRD1	ENST00000388854;ENST00000526390;ENST00000524698;ENST00000526691;ENST00000397736;ENST00000531691;ENST00000526950;ENST00000529784;ENST00000429002;ENST00000526266;ENST00000503506;ENST00000526580;ENST00000528079;ENST00000354940	0.746749	-0.421304	0.00498935	0.116275	down	no
MSTRG.83977	MYH11	ENST00000452625;ENST00000300036	2.02116	1.01518	0.00500077	0.116275	up	no
MSTRG.9710	XIAP	ENST00000355640;ENST00000434753;ENST00000371199;ENST00000422098	0.686159	-0.543384	0.00502323	0.116275	down	no
MSTRG.181888	GABBR1;UBD	ENST00000377012;ENST00000377016;ENST00000462632;ENST00000377050;ENST00000377034;ENST00000376977;ENST00000476670	1.75125	0.808386	0.0050431	0.116275	up	no
MSTRG.106887	DMWD;DMPK;AC011530;SIX5	ENST00000377735;ENST00000291270;ENST00000597660;ENST00000602829;ENST00000596586;ENST00000598237;ENST00000354227;ENST00000343373;ENST00000270223;ENST00000537879;ENST00000560168;ENST00000560160;ENST00000458663;ENST00000447742;ENST00000317578	1.57284	0.653374	0.00504688	0.116275	up	no
MSTRG.34630	SYT15	ENST00000374321;ENST00000374328;ENST00000503753;ENST00000374323	1.98354	0.988075	0.00506363	0.116275	up	no
MSTRG.147749	RNF7;GRK7	ENST00000273480;ENST00000393000;ENST00000480908;ENST00000264952	0.58126	-0.782745	0.00508422	0.116275	down	no
MSTRG.100281	ATP8B1	ENST00000648908;ENST00000585322	1.73778	0.797246	0.00509854	0.116275	up	no
MSTRG.18146	PTGER3	ENST00000306666;ENST00000370924;ENST00000354608;ENST00000351052;ENST00000460330;ENST00000356595;ENST00000628037;ENST00000370932;ENST00000370931	0.423842	-1.2384	0.00512661	0.116275	down	no
MSTRG.204256	ZBED6CL;LRRC61	ENST00000343855;ENST00000323078;ENST00000359623;ENST00000493307	0.538753	-0.892305	0.00514079	0.116275	down	no
MSTRG.123096	BZW1	ENST00000452206;ENST00000409600;ENST00000447069;ENST00000359893;ENST00000419090;ENST00000450637;ENST00000452790;ENST00000409226;ENST00000410110	0.54147	-0.885046	0.00514186	0.116275	down	no
MSTRG.204257	RARRES2	ENST00000223271;ENST00000482669;ENST00000467793;ENST00000466675	0.258425	-1.95218	0.00519765	0.116275	down	no
MSTRG.82857	FAHD1	ENST00000427358;ENST00000615972;ENST00000382668;ENST00000382666	0.795043	-0.330895	0.00522283	0.116275	down	no
MSTRG.77186	EMC7	ENST00000256545;ENST00000527822;ENST00000528949	0.389419	-1.36061	0.00523387	0.116275	down	no
MSTRG.195305	ZNRF2	ENST00000323037	0.81611	-0.293164	0.00524568	0.116275	down	no
MSTRG.207928	ADAM32	ENST00000379907;ENST00000399831;ENST00000519315;ENST00000522506;ENST00000523400;ENST00000437682	0.707374	-0.499455	0.0052536	0.116275	down	no
MSTRG.130167	MOCS3	ENST00000244051	0.823731	-0.279755	0.00526963	0.116275	down	no
MSTRG.200274	ZNF394	ENST00000426306;ENST00000337673	0.919484	-0.121104	0.00527691	0.116275	down	no
MSTRG.37747	FGFBP3	ENST00000311575	0.671463	-0.574619	0.00530476	0.116275	down	no
MSTRG.83711	LITAF	ENST00000339430;ENST00000576334;ENST00000574703;ENST00000571976;ENST00000622633;ENST00000413364;ENST00000572255;ENST00000570904;ENST00000571277;ENST00000574701;ENST00000574763;ENST00000571688	0.791965	-0.336491	0.00532008	0.116275	down	no
MSTRG.116172	RGPD4	ENST00000408999	0.68401	-0.547911	0.00534064	0.116275	down	no
MSTRG.215638	KCNK9	ENST00000520439	0.237638	-2.07316	0.00536965	0.116275	down	no
MSTRG.130956	FAM217B	ENST00000360816;ENST00000358293;ENST00000421092	0.667535	-0.583084	0.00539135	0.116275	down	no
MSTRG.194923	CYCS	ENST00000409409;ENST00000305786	0.627136	-0.67315	0.00543064	0.116275	down	no
MSTRG.151904	MELTF	ENST00000296351;ENST00000439320;ENST00000296350	0.604068	-0.727217	0.00543732	0.116275	down	no
MSTRG.22569	H3-2	ENST00000609879;ENST00000392948	0.676406	-0.564038	0.00544929	0.116275	down	no
MSTRG.45787	BATF2	ENST00000527716;ENST00000301887;ENST00000435842	0.528722	-0.91942	0.00545826	0.116275	down	no
MSTRG.37703	PCGF5	ENST00000614189;ENST00000336126;ENST00000543648	0.519181	-0.945691	0.00551546	0.116275	down	no
MSTRG.29749	C1orf198	ENST00000366663;ENST00000523410;ENST00000470540	0.610591	-0.711723	0.00556456	0.116275	down	no
MSTRG.103842	CYP4F22	ENST00000601005;ENST00000269703	0.26468	-1.91768	0.00558117	0.116275	down	no
MSTRG.41178	OSBPL5	ENST00000263650;ENST00000534157;ENST00000533234;ENST00000526122;ENST00000389989;ENST00000348039;ENST00000478260;ENST00000525498;ENST00000533721	2.16111	1.11177	0.00558987	0.116275	up	no
MSTRG.222379	TMEM38B	ENST00000374692;ENST00000435034;ENST00000374688;ENST00000451560;ENST00000434214	0.544874	-0.876007	0.00562176	0.116275	down	no
MSTRG.55253	FMNL3	ENST00000550488;ENST00000335154;ENST00000352151	2.49375	1.31832	0.00566534	0.116275	up	no
MSTRG.90139	DLG4	ENST00000485100;ENST00000648896;ENST00000648658;ENST00000649971;ENST00000650120;ENST00000649520;ENST00000447163;ENST00000302955;ENST00000649186;ENST00000399506;ENST00000451807;ENST00000486626;ENST00000648172;ENST00000399510;ENST00000647975	1.6426	0.715983	0.00567189	0.116275	up	no
MSTRG.24853	F5	ENST00000367797;ENST00000367796	0.578861	-0.78871	0.00567719	0.116275	down	no
MSTRG.83505	CARHSP1	ENST00000618335;ENST00000610831;ENST00000611932;ENST00000567554;ENST00000614449;ENST00000311052;ENST00000562843;ENST00000568968;ENST00000569398;ENST00000570125;ENST00000396593	0.741957	-0.430592	0.00569958	0.116275	down	no
MSTRG.79525	RORA	ENST00000449337;ENST00000309157;ENST00000559343;ENST00000335670;ENST00000558904	1.7442	0.802562	0.00570666	0.116275	up	no
MSTRG.107848	CDC42EP5	ENST00000301200	0.674376	-0.568376	0.00570918	0.116275	down	no
MSTRG.189600	HINT3	ENST00000229633	0.726455	-0.461055	0.00571881	0.116275	down	no
MSTRG.171326	ANKRD31	ENST00000506364;ENST00000274361	0.586708	-0.769286	0.00572984	0.116275	down	no
MSTRG.53008	PLEKHA5	ENST00000424268;ENST00000538305;ENST00000538714;ENST00000536974;ENST00000299275;ENST00000429027;ENST00000539256;ENST00000540972	2.01886	1.01354	0.00573258	0.116275	up	no
MSTRG.38790	SH3PXD2A	ENST00000369774	2.15811	1.10977	0.00575992	0.116275	up	no
MSTRG.6194	PBDC1	ENST00000373358;ENST00000373357	0.876246	-0.190592	0.00579505	0.116275	down	no
MSTRG.100715	SERPINB13	ENST00000415733;ENST00000269489	0.00339191	-8.20369	0.00579664	0.116275	down	no
MSTRG.76515	NIPA2	ENST00000674477;ENST00000398013;ENST00000561072;ENST00000674330;ENST00000398014;ENST00000539711;ENST00000359727;ENST00000337451;ENST00000674173;ENST00000674289	0.698095	-0.518505	0.00580611	0.116275	down	no
MSTRG.210237	ELOC	ENST00000284811;ENST00000518127;ENST00000519082;ENST00000522337;ENST00000602840;ENST00000523815;ENST00000519487;ENST00000622804;ENST00000520242	0.654275	-0.612031	0.005827	0.116275	down	no
MSTRG.148894	SSR3	ENST00000265044;ENST00000467789;ENST00000476217;ENST00000496050;ENST00000463503	0.515221	-0.956737	0.00584304	0.116275	down	no
MSTRG.221400	FGD3	ENST00000416701;ENST00000468206;ENST00000337352;ENST00000375482	5.07883	2.3445	0.00586543	0.116275	up	no
MSTRG.97599	SNRPD1	ENST00000300413;ENST00000579618;ENST00000582475	0.796872	-0.32758	0.00591167	0.116275	down	no
MSTRG.201011	NAMPT	ENST00000222553;ENST00000417537;ENST00000424768;ENST00000354289	0.494413	-1.01621	0.00593063	0.116275	down	no
MSTRG.78322	DUOX1	ENST00000389037;ENST00000561166;ENST00000321429	2.08734	1.06167	0.00595334	0.116275	up	no
MSTRG.69345	RBM23	ENST00000557245;ENST00000555722;ENST00000346528;ENST00000556862;ENST00000557549;ENST00000359890;ENST00000555691;ENST00000399922;ENST00000557227;ENST00000554256;ENST00000557571;ENST00000553876;ENST00000553884;ENST00000555676;ENST00000542016;ENST00000554618	1.00293	0.00421491	0.00598524	0.116275	up	no
MSTRG.209806	SGK3;C8orf44-SGK3;C8orf44	ENST00000521198;ENST00000396596;ENST00000521152;ENST00000519289;ENST00000520044;ENST00000522398;ENST00000521960;ENST00000345714;ENST00000522629;ENST00000519561;ENST00000518388	0.636192	-0.652466	0.00600797	0.116275	down	no
MSTRG.98454	RNF138;RNF125	ENST00000257190;ENST00000261593;ENST00000217740;ENST00000580499;ENST00000578107;ENST00000578914	0.719252	-0.475431	0.00602757	0.116275	down	no
MSTRG.31543	AKR1C1	ENST00000380872;ENST00000380859	0.568853	-0.813873	0.00607957	0.116275	down	no
MSTRG.27468	PIK3C2B	ENST00000429009;ENST00000367184;ENST00000415899;ENST00000367187;ENST00000424712	2.3303	1.22052	0.00608266	0.116275	up	no
MSTRG.194284	CRPPA;SOSTDC1	ENST00000407010;ENST00000676325;ENST00000399310;ENST00000396652;ENST00000675257;ENST00000307068	0.7305	-0.453045	0.00608709	0.116275	down	no
MSTRG.2075	KLHL15	ENST00000328046	0.530494	-0.914592	0.00613115	0.116275	down	no
MSTRG.97839	OSBPL1A	ENST00000399443;ENST00000399441;ENST00000578013;ENST00000638614;ENST00000319481	0.738719	-0.436903	0.00619997	0.116275	down	no
MSTRG.15719	BMP8A	ENST00000331593	2.53626	1.34271	0.0062182	0.116275	up	no
MSTRG.68790	RASA3	ENST00000334062	1.74308	0.801643	0.00623695	0.116275	up	no
MSTRG.50997	BARX2	ENST00000281437	0.558678	-0.83991	0.00624244	0.116275	down	no
MSTRG.84874	GSG1L	ENST00000447459;ENST00000380897;ENST00000569166	0.294903	-1.76169	0.00625581	0.116275	down	no
MSTRG.182911	DAAM2	ENST00000633794;ENST00000405961;ENST00000538976;ENST00000274867;ENST00000398904	2.07435	1.05266	0.00626332	0.116275	up	no
MSTRG.192629	TTLL2	ENST00000239587	0.439074	-1.18746	0.00628086	0.116275	down	no
MSTRG.31265	IDI1	ENST00000381344;ENST00000429642;ENST00000427898	0.599522	-0.738115	0.00628884	0.116275	down	no
MSTRG.67311	GPC5	ENST00000377067;ENST00000618596;ENST00000618283	0.466066	-1.10139	0.00629959	0.116275	down	no
MSTRG.175660	ZCCHC10	ENST00000509437;ENST00000504170;ENST00000513848;ENST00000324170;ENST00000513541;ENST00000509008	0.508641	-0.97528	0.00630794	0.116275	down	no
MSTRG.81409	PDE8A	ENST00000339708;ENST00000557957;ENST00000310298;ENST00000394553	1.65974	0.730954	0.00633127	0.116275	up	no
ENSG00000179627	ZBTB42	ENST00000342537;ENST00000555360	0.701916	-0.510629	0.00635949	0.116275	down	no
MSTRG.119525	CACNB4;ARL5A	ENST00000636350;ENST00000295087;ENST00000638005;ENST00000636947;ENST00000539935;ENST00000636129;ENST00000636496;ENST00000636130;ENST00000637217;ENST00000638056;ENST00000637762;ENST00000636442;ENST00000428992	0.697634	-0.519457	0.00638845	0.116275	down	no
MSTRG.89485	DBNDD1	ENST00000568838;ENST00000304733;ENST00000392973;ENST00000002501;ENST00000568662	2.41439	1.27166	0.00638895	0.116275	up	no
MSTRG.50244	POU2F3	ENST00000543440;ENST00000260264	0.403239	-1.31029	0.00640477	0.116275	down	no
MSTRG.160347	MCUB	ENST00000394650	0.589358	-0.762784	0.00640816	0.116275	down	no
MSTRG.167575	RETREG1	ENST00000306320;ENST00000399793	0.580696	-0.784144	0.00644799	0.116275	down	no
MSTRG.157633	RCHY1	ENST00000324439;ENST00000512706;ENST00000513257	0.658662	-0.602391	0.00649647	0.116275	down	no
MSTRG.17313	PRKAA2	ENST00000610361;ENST00000371244	0.57049	-0.809728	0.00649664	0.116275	down	no
MSTRG.71662	L2HGDH	ENST00000267436;ENST00000555423;ENST00000555610;ENST00000261699;ENST00000421284	0.761852	-0.392418	0.00650659	0.116275	down	no
MSTRG.85910	ABCC11	ENST00000394748;ENST00000356608;ENST00000394747;ENST00000569991	0.358384	-1.48042	0.00653217	0.116275	down	no
MSTRG.30220	ARID4B;RBM34	ENST00000366603;ENST00000349213;ENST00000429912;ENST00000408888;ENST00000444620;ENST00000418304;ENST00000264183	0.925333	-0.111956	0.00653786	0.116275	down	no
MSTRG.72268	SLC35F4	ENST00000339762;ENST00000556826	0.430578	-1.21565	0.00654674	0.116275	down	no
MSTRG.111389	GEMIN6	ENST00000281950;ENST00000409566;ENST00000409011	0.635857	-0.653226	0.00660203	0.116275	down	no
MSTRG.198384	FZD9	ENST00000344575	0.545032	-0.875588	0.00660776	0.116275	down	no
MSTRG.207933	IDO1	ENST00000519154;ENST00000522495	0.140462	-2.83174	0.00662412	0.116275	down	no
MSTRG.66244	SCEL	ENST00000349847	0.0812518	-3.62146	0.00664136	0.116275	down	no
MSTRG.10867	ZIC3	ENST00000370606;ENST00000287538	0.012499	-6.32205	0.00667972	0.116275	down	no
MSTRG.195723	DPY19L1	ENST00000638088;ENST00000446375;ENST00000612226;ENST00000310974	0.571126	-0.808118	0.00669689	0.116275	down	no
MSTRG.15004	EIF3I	ENST00000373586;ENST00000355082	0.84459	-0.243677	0.00676275	0.116275	down	no
MSTRG.198477	ELN	ENST00000358929;ENST00000414324;ENST00000380576;ENST00000380575;ENST00000621115;ENST00000357036;ENST00000252034;ENST00000445912;ENST00000380562;ENST00000429192;ENST00000458204;ENST00000417091;ENST00000438906;ENST00000431562;ENST00000380584;ENST00000320492;ENST00000428787	3.24013	1.69605	0.00677531	0.116275	up	no
MSTRG.93114	COA3	ENST00000328434	0.618037	-0.694235	0.00677574	0.116275	down	no
MSTRG.39662	EMX2	ENST00000442245;ENST00000553456	3.7213	1.89581	0.00678159	0.116275	up	no
MSTRG.6636	HMGN5	ENST00000358130;ENST00000430960;ENST00000373250;ENST00000436386;ENST00000451455;ENST00000447319	0.69308	-0.528906	0.00682136	0.116275	down	no
MSTRG.103058	ADAMTS10	ENST00000595838;ENST00000270328;ENST00000597188	2.00923	1.00664	0.00689436	0.116275	up	no
MSTRG.64396	KCNRG;TRIM13	ENST00000312942;ENST00000356017;ENST00000457662;ENST00000442421;ENST00000420995;ENST00000378183;ENST00000378182	1.73337	0.793582	0.00710297	0.116275	up	no
MSTRG.62139	IL17D	ENST00000498088;ENST00000304920	0.478012	-1.06488	0.0071284	0.116275	down	no
MSTRG.78795	SPPL2A;AC084756;TRPM7	ENST00000261854;ENST00000558934;ENST00000676296;ENST00000558414;ENST00000560955;ENST00000560638;ENST00000646667	0.760875	-0.394269	0.007135	0.116275	down	no
MSTRG.93129	G6PC	ENST00000592383;ENST00000253801	8.22818	3.04057	0.00714573	0.116275	up	no
MSTRG.172751	MBLAC2	ENST00000316610;ENST00000514906	0.629091	-0.668659	0.00718932	0.116275	down	no
MSTRG.174509	SEMA6A	ENST00000343348;ENST00000503865;ENST00000513137;ENST00000515129;ENST00000510263;ENST00000509665;ENST00000257414	2.92526	1.54857	0.00721183	0.116275	up	no
MSTRG.196546	H2AZ2	ENST00000349299;ENST00000308153;ENST00000222690;ENST00000446531;ENST00000350771;ENST00000437072;ENST00000381124;ENST00000521529	0.732801	-0.448507	0.00722751	0.116275	down	no
MSTRG.125686	UGT1A10;UGT1A7;UGT1A6;UGT1A5;UGT1A4;UGT1A3;UGT1A9	ENST00000373445;ENST00000344644;ENST00000485022;ENST00000305139;ENST00000373414;ENST00000373409;ENST00000482026;ENST00000354728	0.206104	-2.27855	0.0072763	0.116275	down	no
MSTRG.91011	MED9	ENST00000268711;ENST00000580462	0.867959	-0.204302	0.00729626	0.116275	down	no
MSTRG.42263	INSC	ENST00000528567;ENST00000424273;ENST00000530161;ENST00000379556;ENST00000379554;ENST00000525218	2.34087	1.22705	0.0073306	0.116275	up	no
MSTRG.198216	CALN1	ENST00000395275;ENST00000446128;ENST00000329008;ENST00000395276;ENST00000405452	0.336251	-1.57239	0.00735278	0.116275	down	no
MSTRG.56278	SLC16A7	ENST00000549465;ENST00000552024;ENST00000547379;ENST00000261187;ENST00000548444;ENST00000548610	0.462604	-1.11215	0.0073826	0.116275	down	no
MSTRG.218711	HINT2;FAM221B	ENST00000259667;ENST00000472182;ENST00000377984	0.739184	-0.435994	0.00741431	0.116275	down	no
MSTRG.8091	TCEAL9	ENST00000646896;ENST00000372656;ENST00000372661	0.490869	-1.02659	0.00742903	0.116275	down	no
MSTRG.73581	ZNF410;PTGR2	ENST00000442160;ENST00000555044;ENST00000557214;ENST00000324593;ENST00000553813;ENST00000639051;ENST00000555661;ENST00000267568;ENST00000615736;ENST00000554316;ENST00000556797;ENST00000555228;ENST00000556179;ENST00000540593;ENST00000334521;ENST00000554797	0.91637	-0.125998	0.00744246	0.116275	down	no
MSTRG.194828	CCDC126	ENST00000410069;ENST00000307471;ENST00000448353;ENST00000409765	0.520895	-0.940936	0.00745753	0.116275	down	no
MSTRG.41901	RNF141	ENST00000265981;ENST00000528665;ENST00000533412	0.75428	-0.406829	0.007482	0.116275	down	no
MSTRG.103781	TECR	ENST00000215567;ENST00000596073;ENST00000601187	2.10939	1.07683	0.00749603	0.116275	up	no
MSTRG.148866	SLC33A1;C3orf33	ENST00000359479;ENST00000643144;ENST00000340171;ENST00000496772;ENST00000534941;ENST00000646424	0.84551	-0.242106	0.00750857	0.116275	down	no
MSTRG.42140	RRAS2	ENST00000532814;ENST00000414023;ENST00000531421;ENST00000256196;ENST00000531807;ENST00000537760;ENST00000534746;ENST00000526063	0.672263	-0.572903	0.00752284	0.116275	down	no
MSTRG.31209	DIP2C	ENST00000434695;ENST00000381496;ENST00000280886;ENST00000634311;ENST00000421992	1.77675	0.829245	0.00753329	0.116275	up	no
MSTRG.203180	SVOPL	ENST00000674285	0.329124	-1.6033	0.00755641	0.116275	down	no
MSTRG.22225	SPAG17	ENST00000336338;ENST00000437255	0.669762	-0.578279	0.00757755	0.116275	down	no
MSTRG.63361	FREM2	ENST00000280481	0.139669	-2.83991	0.00759497	0.116275	down	no
MSTRG.41654	PPFIBP2	ENST00000534552;ENST00000529575;ENST00000650027;ENST00000528947;ENST00000530181;ENST00000299492;ENST00000526046;ENST00000525597;ENST00000534409;ENST00000527790;ENST00000533792;ENST00000524548;ENST00000526873	1.76444	0.819214	0.00764654	0.116275	up	no
MSTRG.105329	RHPN2	ENST00000254260	0.571952	-0.806033	0.00764752	0.116275	down	no
MSTRG.93586	MRPL10	ENST00000414011;ENST00000290208;ENST00000351111	0.758179	-0.399389	0.00765269	0.116275	down	no
MSTRG.5786	BX276092	ENST00000636096	0.0304639	-5.03675	0.0076849	0.116275	down	no
MSTRG.203750	CTAGE4	ENST00000486333	0.883604	-0.178528	0.0077022	0.116275	down	no
MSTRG.103015	ANGPTL4	ENST00000393962;ENST00000601770;ENST00000599192;ENST00000301455	0.556993	-0.84427	0.00770387	0.116275	down	no
MSTRG.177023	MARCOL	ENST00000638089;ENST00000638059	0.225656	-2.14781	0.00771551	0.116275	down	no
MSTRG.159451	EIF4E	ENST00000450253;ENST00000504432;ENST00000280892;ENST00000505992;ENST00000511644	0.734788	-0.444601	0.00776324	0.116275	down	no
MSTRG.81864	SV2B	ENST00000330276;ENST00000394232;ENST00000545111	0.57045	-0.809829	0.00778028	0.116275	down	no
MSTRG.224630	CACFD1	ENST00000542192;ENST00000316948;ENST00000444798;ENST00000291722;ENST00000540581	0.74553	-0.423661	0.00780691	0.116275	down	no
ENSG00000148704	VAX1	ENST00000369206;ENST00000277905	0.00372931	-8.06687	0.00786373	0.116275	down	no
MSTRG.79622	TLN2	ENST00000472902;ENST00000561311;ENST00000636159	1.88234	0.912531	0.00786376	0.116275	up	no
MSTRG.170542	RGS7BP	ENST00000334025	0.479338	-1.06089	0.0078682	0.116275	down	no
MSTRG.8085	BEX2	ENST00000536889;ENST00000372674;ENST00000372677	0.286453	-1.80363	0.00794224	0.116275	down	no
MSTRG.102946	TGFBR3L	ENST00000565886	0.567694	-0.816815	0.00794753	0.116275	down	no
MSTRG.182316	SYNGAP1	ENST00000428982;ENST00000629380;ENST00000628646;ENST00000646630;ENST00000418600;ENST00000449372;ENST00000636905	1.84982	0.887387	0.0079637	0.116275	up	no
ENSG00000139515	PDX1	ENST00000381033	0.00162298	-9.26714	0.00802159	0.116275	down	no
MSTRG.120458	GALNT3	ENST00000392701;ENST00000414977;ENST00000412248;ENST00000431484;ENST00000409882;ENST00000422973;ENST00000447156	2.2914	1.19623	0.00802292	0.116275	up	no
MSTRG.20197	GCLM	ENST00000370238;ENST00000615724	0.749056	-0.416854	0.00805722	0.116275	down	no
MSTRG.93110	RND2	ENST00000587250	0.602944	-0.729903	0.00806299	0.116275	down	no
MSTRG.11991	LAGE3	ENST00000357360	0.576784	-0.793896	0.00807076	0.116275	down	no
MSTRG.201117	DNAJB9	ENST00000249356	0.476848	-1.0684	0.00807137	0.116275	down	no
MSTRG.96761	DLGAP1	ENST00000315677;ENST00000400149;ENST00000581527;ENST00000400147;ENST00000400150;ENST00000515196;ENST00000400145;ENST00000639615	0.443095	-1.17431	0.00807561	0.116275	down	no
MSTRG.87452	THAP11	ENST00000303596	0.690971	-0.533303	0.00809287	0.116275	down	no
MSTRG.25712	TOR1AIP1	ENST00000271583;ENST00000447964;ENST00000435319;ENST00000527391;ENST00000606911;ENST00000528443;ENST00000531630	0.830038	-0.268751	0.0081937	0.116275	down	no
MSTRG.126467	SIRPB1;SIRPD;AL049634	ENST00000565076;ENST00000279477;ENST00000381621;ENST00000381605;ENST00000381603;ENST00000429387;ENST00000567028;ENST00000565087;ENST00000566961	0.59483	-0.749451	0.00819375	0.116275	down	no
MSTRG.197012	DDC	ENST00000444124;ENST00000420203;ENST00000357936	0.162297	-2.62329	0.00821501	0.116275	down	no
MSTRG.111068	CRIM1	ENST00000413985;ENST00000280527;ENST00000428774;ENST00000426856	0.646992	-0.628181	0.00824034	0.116275	down	no
MSTRG.175653	AFF4	ENST00000425658;ENST00000421773;ENST00000378595;ENST00000265343	0.834488	-0.261036	0.00824196	0.116275	down	no
MSTRG.6417	CYSLTR1	ENST00000373304;ENST00000614798	0.490409	-1.02794	0.00824944	0.116275	down	no
MSTRG.133191	SOD1	ENST00000270142	0.629776	-0.667088	0.00827792	0.116275	down	no
MSTRG.12068	F8A3;CLIC2	ENST00000622749;ENST00000369449;ENST00000321926	0.809178	-0.305471	0.00832417	0.116275	down	no
MSTRG.55583	KRT6C	ENST00000252250	0.0060611	-7.3662	0.00833686	0.116275	down	no
MSTRG.68752	TMCO3	ENST00000434316;ENST00000620021;ENST00000474393;ENST00000622371;ENST00000462877;ENST00000473287	0.758463	-0.398849	0.00838651	0.116275	down	no
MSTRG.182017	MRPS18B	ENST00000259873	0.672819	-0.571709	0.00841266	0.116275	down	no
MSTRG.40540	EBF3	ENST00000355311;ENST00000368648;ENST00000440978	2.63002	1.39508	0.00843406	0.116275	up	no
MSTRG.40404	FOXI2	ENST00000388920	0.287831	-1.79671	0.0084385	0.116275	down	no
MSTRG.104175	JUND;IQCN	ENST00000252818;ENST00000392413;ENST00000612316;ENST00000600359;ENST00000600972;ENST00000593659;ENST00000608950	2.87907	1.5256	0.00851584	0.116275	up	no
MSTRG.6945	SATL1	ENST00000646235;ENST00000646118	0.124587	-3.00478	0.00854476	0.116275	down	no
MSTRG.80256	THAP10	ENST00000249861	0.651233	-0.618754	0.00858318	0.116275	down	no
MSTRG.219033	ANKRD20A2P	ENST00000611747	0.517921	-0.949196	0.00858392	0.116275	down	no
MSTRG.104297	PBX4	ENST00000251203	2.11358	1.07969	0.00861218	0.116275	up	no
MSTRG.14430	TRNP1	ENST00000522111;ENST00000531285	0.722482	-0.468967	0.00862731	0.116275	down	no
MSTRG.175836	TXNDC15;PCBD2;CATSPER3	ENST00000358387;ENST00000512783;ENST00000254908;ENST00000508810;ENST00000282611;ENST00000508779	0.864143	-0.210658	0.00863886	0.116275	down	no
MSTRG.183104	RPL7L1	ENST00000493763;ENST00000304734;ENST00000602561	0.763506	-0.389288	0.00864312	0.116275	down	no
MSTRG.47122	NARS2	ENST00000281038;ENST00000528850;ENST00000529771	0.763734	-0.388857	0.00866506	0.116275	down	no
MSTRG.77119	FMN1	ENST00000558711;ENST00000616417;ENST00000558197;ENST00000672206;ENST00000334528;ENST00000559610;ENST00000320930;ENST00000561249;ENST00000560317	0.781863	-0.355013	0.00866532	0.116275	down	no
MSTRG.75951	CKB	ENST00000553878;ENST00000348956;ENST00000555039;ENST00000553610	2.57513	1.36464	0.00868182	0.116275	up	no
MSTRG.117592	CYP27C1	ENST00000664447	1.66695	0.737211	0.00870007	0.116275	up	no
MSTRG.143022	PDZRN3	ENST00000308537;ENST00000479530;ENST00000462146;ENST00000492909;ENST00000466780;ENST00000263666	1.76822	0.822299	0.00872133	0.116275	up	no
MSTRG.86538	MT1H	ENST00000569155;ENST00000332374	0.459098	-1.12313	0.0087226	0.116275	down	no
MSTRG.158270	ABRAXAS1	ENST00000321945;ENST00000506553;ENST00000611288;ENST00000515303	0.772534	-0.37233	0.00877685	0.116275	down	no
MSTRG.203666	TAS2R60	ENST00000332690	0.100396	-3.31623	0.00881665	0.116275	down	no
MSTRG.182915	MOCS1	ENST00000373188;ENST00000340692;ENST00000373195	2.05896	1.04192	0.00881782	0.116275	up	no
MSTRG.82690	WDR90	ENST00000547944;ENST00000315764;ENST00000293879;ENST00000549091;ENST00000550739;ENST00000551100	1.72023	0.7826	0.00882903	0.116275	up	no
MSTRG.168923	EGFLAM	ENST00000514476;ENST00000322350;ENST00000508131;ENST00000354891;ENST00000506135;ENST00000397210;ENST00000336740	0.702806	-0.508802	0.00883268	0.116275	down	no
MSTRG.36463	ANXA7	ENST00000372921;ENST00000394847;ENST00000372919	0.79644	-0.328362	0.00884605	0.116275	down	no
MSTRG.42747	GAS2	ENST00000534801;ENST00000533363;ENST00000532398;ENST00000454584	0.621237	-0.686785	0.00887577	0.116275	down	no
MSTRG.86606	CX3CL1	ENST00000006053;ENST00000563383;ENST00000565912	2.33536	1.22365	0.00887882	0.116275	up	no
MSTRG.130071	UBE2V1;TMEM189	ENST00000557021;ENST00000371657;ENST00000371677;ENST00000371656;ENST00000625172;ENST00000420027;ENST00000415862;ENST00000371674;ENST00000371652;ENST00000340309	1.61658	0.692947	0.00889858	0.116275	up	no
MSTRG.8337	PWWP3B	ENST00000337685;ENST00000372552	0.427743	-1.22518	0.0089369	0.116275	down	no
MSTRG.121965	FSIP2	ENST00000424728	0.798298	-0.325001	0.00900297	0.116275	down	no
ENSG00000169840	GSX1	ENST00000302945	0.00125809	-9.63455	0.00906918	0.116275	down	no
MSTRG.221789	TRMO	ENST00000375119;ENST00000455506;ENST00000611338;ENST00000375118;ENST00000375117	0.724827	-0.464291	0.00908083	0.116275	down	no
MSTRG.12591	LRRC47	ENST00000378251	0.840753	-0.250246	0.00912998	0.116275	down	no
MSTRG.176828	POU4F3;AC091959;RBM27	ENST00000646991;ENST00000506502;ENST00000265271	0.869625	-0.201534	0.00913659	0.116275	down	no
MSTRG.100222	ONECUT2	ENST00000491143	0.503441	-0.990104	0.00913842	0.116275	down	no
MSTRG.119408	STAM2	ENST00000263904	0.782967	-0.352976	0.00914261	0.116275	down	no
MSTRG.154098	SMIM20	ENST00000614775;ENST00000506197	0.515643	-0.955555	0.00914268	0.116275	down	no
MSTRG.212030	DPY19L4	ENST00000523020;ENST00000521525;ENST00000414645;ENST00000519353;ENST00000522422;ENST00000519176	0.687702	-0.540144	0.00914531	0.116275	down	no
MSTRG.133353	TMEM50B	ENST00000542230;ENST00000432504	0.773963	-0.369664	0.00915953	0.116275	down	no
MSTRG.98319	DSC2	ENST00000251081;ENST00000648081;ENST00000280904	0.521165	-0.940188	0.00927329	0.116275	down	no
MSTRG.224118	ST6GALNAC6;AK1;ST6GALNAC4	ENST00000373144;ENST00000373146;ENST00000644144;ENST00000447681;ENST00000622357;ENST00000373142;ENST00000291839;ENST00000223836;ENST00000335791;ENST00000542456;ENST00000361444;ENST00000373141;ENST00000373156	0.883216	-0.179162	0.00932564	0.116275	down	no
MSTRG.197009	FIGNL1	ENST00000611938;ENST00000395556;ENST00000419119;ENST00000436590;ENST00000420829;ENST00000356889;ENST00000433017;ENST00000422854;ENST00000615084;ENST00000440350	0.839377	-0.25261	0.00934792	0.116275	down	no
MSTRG.95114	NOL11	ENST00000581106;ENST00000580833;ENST00000253247;ENST00000583021	0.829857	-0.269066	0.0093678	0.116275	down	no
MSTRG.10133	APLN	ENST00000429967	2.99159	1.58091	0.00937932	0.116275	up	no
MSTRG.147135	CDV3	ENST00000420115;ENST00000515421;ENST00000431519;ENST00000264993	0.861436	-0.215184	0.00946375	0.116275	down	no
MSTRG.103265	TIMM29	ENST00000270502	0.714561	-0.484872	0.00957376	0.116275	down	no
MSTRG.117659	POLR2D	ENST00000272645;ENST00000409955;ENST00000409698	0.863178	-0.21227	0.00960265	0.116275	down	no
MSTRG.59876	APPL2	ENST00000539978;ENST00000546731;ENST00000551662;ENST00000549056;ENST00000553109;ENST00000258530	1.61777	0.694009	0.00962345	0.116275	up	no
MSTRG.113817	SPR	ENST00000234454	0.583663	-0.776793	0.00967878	0.116275	down	no
MSTRG.100726	SERPINB11	ENST00000382749	0.0198662	-5.65354	0.00976164	0.116275	down	no
MSTRG.72818	SGPP1	ENST00000247225	0.720473	-0.472983	0.00976491	0.116275	down	no
MSTRG.126136	COPS9	ENST00000607357;ENST00000307266	0.611702	-0.709099	0.00976636	0.116275	down	no
MSTRG.206593	SFTPC	ENST00000521315;ENST00000318561;ENST00000437090;ENST00000524255;ENST00000522109	0.120696	-3.05056	0.0097686	0.116275	down	no
MSTRG.10331	OR13H1	ENST00000338616	0.000822226	-10.2482	0.00978747	0.116275	down	no
MSTRG.55927	RPS26	ENST00000646449;ENST00000356464	0.472401	-1.08192	0.00979044	0.116275	down	no
MSTRG.48245	SRSF8	ENST00000587424	0.731563	-0.450945	0.00979937	0.116275	down	no
MSTRG.41342	OR51L1	ENST00000641819	0.00536	-7.54355	0.00985962	0.116275	down	no
MSTRG.221879	ALG2	ENST00000476832;ENST00000319033	0.787671	-0.344336	0.009896	0.116275	down	no
MSTRG.101949	SLC66A2	ENST00000590381;ENST00000478144;ENST00000357575;ENST00000397778	0.938654	-0.091334	0.00990363	0.116275	down	no
MSTRG.67540	HS6ST3	ENST00000620595;ENST00000376705	0.374112	-1.41846	0.00991198	0.116275	down	no
MSTRG.82526	ALDH1A3	ENST00000329841;ENST00000557963;ENST00000346623	0.701632	-0.511213	0.00997779	0.116275	down	no
MSTRG.115459	CNGA3	ENST00000436404	0.0183627	-5.76708	0.009978	0.116275	down	no
MSTRG.142037	DENND6A	ENST00000311128;ENST00000477344;ENST00000471531	0.818811	-0.288398	0.010013	0.116275	down	no
MSTRG.70565	MIPOL1	ENST00000396294;ENST00000556451;ENST00000539062;ENST00000556615;ENST00000327441;ENST00000556753;ENST00000537471	0.765685	-0.385177	0.0100133	0.116275	down	no
MSTRG.91142	TVP23B	ENST00000476139;ENST00000581733;ENST00000307767;ENST00000574226	0.611052	-0.710634	0.0100555	0.116275	down	no
MSTRG.223164	COL27A1	ENST00000356083;ENST00000451716	2.01534	1.01102	0.0100657	0.116275	up	no
MSTRG.65466	PCDH9	ENST00000377861;ENST00000456367;ENST00000377865	0.565633	-0.822063	0.0101507	0.116275	down	no
MSTRG.159709	SLC39A8	ENST00000394833;ENST00000424970;ENST00000356736	0.6512	-0.618826	0.0101545	0.116275	down	no
MSTRG.29842	EXOC8	ENST00000366645	0.682913	-0.550225	0.0101903	0.116275	down	no
MSTRG.21615	CHI3L2	ENST00000524472;ENST00000497220;ENST00000486561;ENST00000369748;ENST00000369744;ENST00000528451;ENST00000445067;ENST00000467038;ENST00000474304;ENST00000472825;ENST00000466741	0.351001	-1.51045	0.0102185	0.116275	down	no
MSTRG.107697	ZNF160	ENST00000599637;ENST00000601421;ENST00000601982;ENST00000418871;ENST00000429604;ENST00000599247;ENST00000599056;ENST00000355147	1.60925	0.686385	0.0102492	0.116275	up	no
MSTRG.131722	TPTE	ENST00000618007;ENST00000612957	0.368811	-1.43905	0.0102713	0.116275	down	no
MSTRG.176973	HTR4	ENST00000520086;ENST00000360693;ENST00000520514;ENST00000521530	0.142857	-2.80736	0.0102783	0.116275	down	no
MSTRG.189938	TMEM200A	ENST00000296978;ENST00000545622;ENST00000617887;ENST00000392429	0.546466	-0.871797	0.0102831	0.116275	down	no
MSTRG.202060	CADPS2	ENST00000449022;ENST00000615869;ENST00000397721;ENST00000313070;ENST00000412584	0.776878	-0.364239	0.010296	0.116275	down	no
MSTRG.106816	FOSB	ENST00000443841;ENST00000592811;ENST00000592436;ENST00000590335;ENST00000353609;ENST00000585836;ENST00000417353;ENST00000591858;ENST00000586615	2.53047	1.3394	0.0102997	0.116275	up	no
MSTRG.71213	KLHL28	ENST00000396128;ENST00000557468;ENST00000556239;ENST00000556500;ENST00000579157;ENST00000355081	0.630633	-0.665128	0.0103062	0.116275	down	no
MSTRG.199512	STEAP2	ENST00000394632;ENST00000287908;ENST00000394621;ENST00000426158;ENST00000394622;ENST00000428074;ENST00000394629;ENST00000394626	0.614243	-0.703118	0.0103273	0.116275	down	no
MSTRG.216299	CDC37L1	ENST00000381854;ENST00000381858	0.785175	-0.348913	0.0103335	0.116275	down	no
MSTRG.177808	EBF1	ENST00000313708;ENST00000517373;ENST00000380654;ENST00000622875	2.29469	1.1983	0.0103461	0.116275	up	no
MSTRG.163807	MAP9	ENST00000311277;ENST00000433024;ENST00000379248;ENST00000503466;ENST00000650955;ENST00000450097;ENST00000515654	0.50771	-0.977922	0.0103471	0.116275	down	no
MSTRG.16539	SLC5A9	ENST00000533824;ENST00000438567;ENST00000236495	1.95669	0.968416	0.0104464	0.116275	up	no
ENSG00000279301	OR2T11	ENST00000641193;ENST00000625105	0.00299352	-8.38394	0.0104573	0.116275	down	no
MSTRG.8594	GUCY2F	ENST00000218006	0.0487863	-4.35738	0.0105485	0.116275	down	no
MSTRG.75238	CLMN	ENST00000555336;ENST00000555615;ENST00000556441;ENST00000298912	1.99728	0.998039	0.0106003	0.116275	up	no
MSTRG.184193	KIAA1586	ENST00000545356;ENST00000370733	0.805346	-0.31232	0.0106419	0.116275	down	no
MSTRG.164013	TMEM144	ENST00000502698;ENST00000509278;ENST00000508243;ENST00000514558;ENST00000296529;ENST00000512481	1.83637	0.876855	0.0107031	0.116275	up	no
MSTRG.206325	NAT2	ENST00000286479	0.455643	-1.13402	0.0107298	0.116275	down	no
MSTRG.40094	HTRA1	ENST00000368984;ENST00000420892	0.5697	-0.811726	0.0107755	0.116275	down	no
MSTRG.36292	UNC5B	ENST00000335350;ENST00000373192	1.9632	0.973208	0.0107878	0.116275	up	no
MSTRG.12399	ACAP3	ENST00000354700;ENST00000353662	2.02476	1.01775	0.0108095	0.116275	up	no
MSTRG.111786	CALM2;STPG4	ENST00000656538;ENST00000272298;ENST00000655450;ENST00000445927;ENST00000456319;ENST00000409563;ENST00000668667;ENST00000294947;ENST00000655728	0.644052	-0.63475	0.0108155	0.116275	down	no
MSTRG.97079	TWSG1	ENST00000262120;ENST00000581641	0.482589	-1.05113	0.0108253	0.116275	down	no
MSTRG.13336	PRAMEF14	ENST00000334600	0.00217381	-8.84556	0.010855	0.116275	down	no
MSTRG.144388	GABRR3	ENST00000621172	0.0534092	-4.22677	0.0109115	0.116275	down	no
MSTRG.8033	TCEAL2	ENST00000372780	0.692677	-0.529745	0.0109255	0.116275	down	no
MSTRG.135253	DDTL	ENST00000215770	0.644094	-0.634656	0.0109372	0.116275	down	no
MSTRG.112378	CHAC2	ENST00000295304	0.752626	-0.409995	0.0109409	0.116275	down	no
MSTRG.83734	RSL1D1	ENST00000571133;ENST00000573251;ENST00000573791;ENST00000355674;ENST00000571988	0.81541	-0.294403	0.0109618	0.116275	down	no
MSTRG.151678	APOD	ENST00000453131;ENST00000421243;ENST00000343267	0.32604	-1.61688	0.010963	0.116275	down	no
MSTRG.175194	PHAX	ENST00000297540	0.759065	-0.397705	0.01101	0.116275	down	no
MSTRG.222074	PGAP4	ENST00000374848;ENST00000374851;ENST00000374847	0.567857	-0.816401	0.0110756	0.116275	down	no
MSTRG.71682	SAV1	ENST00000324679;ENST00000557458;ENST00000555720;ENST00000556735	0.778641	-0.36097	0.011116	0.116275	down	no
MSTRG.62718	CDX2	ENST00000381020	0.00294727	-8.40641	0.0111513	0.116275	down	no
MSTRG.89382	CDH15	ENST00000289746	4.40558	2.13933	0.0111746	0.116275	up	no
MSTRG.20662	GPR88	ENST00000315033	0.471043	-1.08607	0.0111892	0.116275	down	no
MSTRG.184968	SDHAF4	ENST00000370474	0.755045	-0.405365	0.0112069	0.116275	down	no
MSTRG.25329	TNN	ENST00000239462	5.43474	2.44221	0.0112221	0.116275	up	no
MSTRG.158554	MEPE	ENST00000361056;ENST00000497649;ENST00000540395;ENST00000395102;ENST00000424957;ENST00000511670	6.31925	2.65975	0.011226	0.116275	up	no
MSTRG.57991	MYF5	ENST00000228644	0.00130026	-9.58698	0.0113044	0.116275	down	no
MSTRG.205540	CLDN23	ENST00000519106	0.584859	-0.773838	0.0113117	0.116275	down	no
MSTRG.83502	PMM2	ENST00000268261;ENST00000566983	1.8784	0.909505	0.0113443	0.116275	up	no
MSTRG.154791	ARAP2	ENST00000303965;ENST00000511416;ENST00000506189	0.576893	-0.793624	0.0113597	0.116275	down	no
MSTRG.182170	NOTCH4;GPSM3	ENST00000375023;ENST00000375040;ENST00000487761	2.94266	1.55712	0.0113615	0.116275	up	no
MSTRG.83500	TMEM186	ENST00000333050	0.768688	-0.37953	0.0113745	0.116275	down	no
MSTRG.42353	C11orf58	ENST00000525684;ENST00000228136;ENST00000524439	0.807532	-0.308409	0.0114218	0.116275	down	no
MSTRG.13977	RAP1GAP	ENST00000542643;ENST00000290101;ENST00000374763;ENST00000374761;ENST00000447293;ENST00000374765	2.49592	1.31957	0.0114319	0.116275	up	no
MSTRG.170116	SETD9	ENST00000628593;ENST00000423328;ENST00000285947	0.685546	-0.544675	0.0114533	0.116275	down	no
MSTRG.200354	ZKSCAN1	ENST00000535170;ENST00000620510;ENST00000426572;ENST00000324306	0.842773	-0.246785	0.0114676	0.116275	down	no
MSTRG.156309	PPAT	ENST00000264220	0.739378	-0.435615	0.0114871	0.116275	down	no
MSTRG.82700	MSLN	ENST00000545450;ENST00000382862;ENST00000566549;ENST00000561896;ENST00000569566	0.431582	-1.21229	0.0115286	0.116275	down	no
MSTRG.117647	LIMS2	ENST00000409754;ENST00000410038;ENST00000409286;ENST00000409455;ENST00000410011;ENST00000409254;ENST00000545738;ENST00000409808;ENST00000355119;ENST00000324938;ENST00000426981	2.51194	1.3288	0.0115551	0.116275	up	no
MSTRG.178471	RARS1	ENST00000231572	0.891101	-0.166339	0.0115846	0.116275	down	no
MSTRG.62445	ATP12A	ENST00000381946	0.0038176	-8.03312	0.011621	0.116275	down	no
MSTRG.78371	BLOC1S6;SQOR;AC090527	ENST00000564765;ENST00000568606;ENST00000565997;ENST00000561493;ENST00000563296;ENST00000220531;ENST00000566801;ENST00000565409;ENST00000561735;ENST00000566934;ENST00000568816;ENST00000565216;ENST00000260324;ENST00000565323;ENST00000567461;ENST00000569076;ENST00000562384;ENST00000564080	0.789151	-0.341627	0.0116325	0.116275	down	no
MSTRG.141973	TASOR	ENST00000493960;ENST00000431842;ENST00000355628;ENST00000614531	0.859903	-0.217754	0.0116617	0.116275	down	no
MSTRG.76165	TMEM121	ENST00000392519;ENST00000431372	0.660225	-0.598971	0.011681	0.116275	down	no
MSTRG.176910	SPINK1	ENST00000296695;ENST00000510027	0.00155122	-9.33238	0.0116884	0.116275	down	no
MSTRG.90043	PITPNM3	ENST00000421306;ENST00000262483;ENST00000575201	2.09875	1.06953	0.0116896	0.116275	up	no
MSTRG.135648	CCDC117	ENST00000249064;ENST00000421503;ENST00000448492;ENST00000432510;ENST00000444523	0.920056	-0.120206	0.0117049	0.116275	down	no
MSTRG.34584	ZFAND4	ENST00000344646;ENST00000374366;ENST00000374371	0.855792	-0.224669	0.0117579	0.116275	down	no
MSTRG.149449	SI	ENST00000264382	0.00529986	-7.55983	0.0117701	0.116275	down	no
MSTRG.163809	GUCY1A1	ENST00000506455;ENST00000296518;ENST00000393832;ENST00000511108;ENST00000513574;ENST00000621234;ENST00000455639;ENST00000511507	0.485407	-1.04273	0.0118034	0.116275	down	no
MSTRG.183379	MEP1A	ENST00000611727	0.0432338	-4.5317	0.0118265	0.116275	down	no
MSTRG.159548	MTTP	ENST00000457717;ENST00000511045;ENST00000265517;ENST00000422897	0.561281	-0.833204	0.0118387	0.116275	down	no
MSTRG.79788	CLPX	ENST00000300107;ENST00000559218	0.877728	-0.188154	0.0118958	0.116275	down	no
MSTRG.124530	STK36	ENST00000440309;ENST00000295709;ENST00000392105;ENST00000455724	1.70648	0.771026	0.0118964	0.116275	up	no
MSTRG.209253	SDCBP	ENST00000630925;ENST00000260130;ENST00000447182;ENST00000523483;ENST00000447267;ENST00000413219	0.712231	-0.489582	0.0119097	0.116275	down	no
MSTRG.103392	ZNF763;AC008770;ZNF700	ENST00000343949;ENST00000590798;ENST00000586494;ENST00000481745;ENST00000591944;ENST00000482090;ENST00000254321;ENST00000358987;ENST00000622593;ENST00000592625	1.64061	0.71423	0.0119222	0.116275	up	no
MSTRG.98098	CHST9	ENST00000618847	0.264829	-1.91687	0.0119283	0.116275	down	no
MSTRG.1627	ADGRG2	ENST00000340581;ENST00000379873;ENST00000379878;ENST00000357991;ENST00000357544;ENST00000379876;ENST00000354791;ENST00000356606;ENST00000379869;ENST00000360279	0.601009	-0.734543	0.01193	0.116275	down	no
MSTRG.208000	ZMAT4	ENST00000297737;ENST00000315769;ENST00000519406	0.397489	-1.33101	0.0119304	0.116275	down	no
MSTRG.41356	HBB	ENST00000485743;ENST00000335295	0.0452087	-4.46725	0.011933	0.116275	down	no
MSTRG.56028	PTGES3	ENST00000414274;ENST00000262033;ENST00000448157;ENST00000614328	0.668064	-0.581941	0.011938	0.116275	down	no
MSTRG.117179	TSN	ENST00000536142;ENST00000389682;ENST00000409193	0.537571	-0.895473	0.012023	0.116275	down	no
MSTRG.100241	FECH	ENST00000591977;ENST00000652755;ENST00000262093;ENST00000592699;ENST00000382873	0.698011	-0.518679	0.0120346	0.116275	down	no
MSTRG.47325	SYTL2	ENST00000530351;ENST00000524452;ENST00000354566;ENST00000316356;ENST00000528231;ENST00000533577;ENST00000359152;ENST00000634661;ENST00000527523;ENST00000532221;ENST00000525702;ENST00000533057;ENST00000529581;ENST00000389960;ENST00000533892	2.29078	1.19584	0.0120438	0.116275	up	no
MSTRG.5010	SPIN4	ENST00000374884	0.737191	-0.439891	0.0120548	0.116275	down	no
MSTRG.59531	ARL1	ENST00000539055;ENST00000261636;ENST00000536227;ENST00000551828;ENST00000548070;ENST00000551671	0.613292	-0.705354	0.0120629	0.116275	down	no
MSTRG.34839	ASAH2	ENST00000395526;ENST00000443575	0.694092	-0.526801	0.0120783	0.116275	down	no
MSTRG.41545	OR2AG2	ENST00000641124;ENST00000338569	0.783526	-0.351947	0.0120885	0.116275	down	no
MSTRG.59444	ANO4	ENST00000392977;ENST00000392979;ENST00000546991;ENST00000644049	0.148477	-2.75169	0.0120913	0.116275	down	no
MSTRG.138489	THUMPD3	ENST00000515662;ENST00000416603;ENST00000441127;ENST00000417036;ENST00000345094;ENST00000419437;ENST00000452837	0.800663	-0.320733	0.012107	0.116275	down	no
MSTRG.157576	BTC	ENST00000395743;ENST00000512743	0.648322	-0.625218	0.0121318	0.116275	down	no
MSTRG.27336	CHI3L1	ENST00000255409;ENST00000404436	0.410087	-1.286	0.0121587	0.116275	down	no
MSTRG.175822	SAR1B	ENST00000509730;ENST00000402673;ENST00000507419;ENST00000502286;ENST00000505758;ENST00000439578	0.638092	-0.648165	0.0121611	0.116275	down	no
MSTRG.135814	SEC14L6	ENST00000402034;ENST00000437871	0.680524	-0.555283	0.0121898	0.116275	down	no
MSTRG.120561	B3GALT1	ENST00000392690	0.605648	-0.723449	0.0121936	0.116275	down	no
MSTRG.113686	TGFA	ENST00000444975;ENST00000418333;ENST00000295400;ENST00000394241;ENST00000445399;ENST00000450929	0.540986	-0.886338	0.0122299	0.116275	down	no
MSTRG.42444	HPS5	ENST00000396253;ENST00000531848;ENST00000537258;ENST00000544218;ENST00000349215;ENST00000438420	0.693432	-0.528173	0.012255	0.116275	down	no
MSTRG.89705	SGSM2	ENST00000570431;ENST00000573851;ENST00000426855;ENST00000572925;ENST00000268989;ENST00000574563	1.66297	0.733762	0.0123004	0.116275	up	no
MSTRG.40795	ECHS1	ENST00000368547	0.64983	-0.621866	0.012314	0.116275	down	no
MSTRG.46722	OR2AT4	ENST00000305159;ENST00000641541	0.336575	-1.571	0.0123473	0.116275	down	no
MSTRG.79931	DIS3L	ENST00000530615;ENST00000319212;ENST00000319194;ENST00000532580;ENST00000525109;ENST00000525134	0.995369	-0.00669598	0.0123794	0.116275	down	no
MSTRG.159617	DNAJB14;H2AZ1	ENST00000442697;ENST00000296417;ENST00000610281	0.628685	-0.669592	0.0123804	0.116275	down	no
MSTRG.73536	DNAL1	ENST00000553645;ENST00000559993;ENST00000311089;ENST00000555631;ENST00000555919;ENST00000554113;ENST00000554871	0.756482	-0.402622	0.0123936	0.116275	down	no
MSTRG.127014	TMX4	ENST00000246024	0.540345	-0.888047	0.0124045	0.116275	down	no
MSTRG.221854	GALNT12	ENST00000375011	0.753257	-0.408786	0.012408	0.116275	down	no
MSTRG.144597	IMPG2	ENST00000193391	0.715334	-0.483312	0.0124085	0.116275	down	no
MSTRG.42746	FANCF	ENST00000327470	0.671912	-0.573655	0.0124244	0.116275	down	no
MSTRG.79421	CCNB2	ENST00000621385;ENST00000288207	2.12825	1.08967	0.0124859	0.116275	up	no
MSTRG.14289	SYF2	ENST00000236273;ENST00000354361	0.755514	-0.40447	0.0124878	0.116275	down	no
MSTRG.211653	OSGIN2	ENST00000520659;ENST00000451899;ENST00000647849;ENST00000297438	0.640897	-0.641836	0.0124982	0.116275	down	no
MSTRG.59163	NTN4	ENST00000547980;ENST00000343702;ENST00000674345;ENST00000344911;ENST00000553059	0.575264	-0.797703	0.0125553	0.116275	down	no
ENSG00000172457	OR9G4	ENST00000641668;ENST00000302957	0.00243743	-8.68042	0.0126622	0.116275	down	no
MSTRG.174068	NREP	ENST00000515855;ENST00000419114;ENST00000446294;ENST00000509025;ENST00000453526;ENST00000379671;ENST00000509979;ENST00000395634;ENST00000508870;ENST00000257435;ENST00000447165;ENST00000513100;ENST00000509427	2.27355	1.18494	0.0126688	0.116275	up	no
MSTRG.17184	MROH7;TTC4;ACOT11	ENST00000421030;ENST00000339553;ENST00000395690;ENST00000371281;ENST00000371316;ENST00000343744	1.7406	0.799584	0.0127058	0.116275	up	no
MSTRG.110459	IFT172	ENST00000443889;ENST00000359466;ENST00000260570;ENST00000675728;ENST00000675690	1.65603	0.72773	0.0127545	0.116275	up	no
MSTRG.89456	FANCA	ENST00000568369;ENST00000389301;ENST00000389302;ENST00000563673;ENST00000564475;ENST00000561722;ENST00000567879	2.10533	1.07405	0.0127637	0.116275	up	no
MSTRG.11914	DUSP9	ENST00000342782	0.00283652	-8.46166	0.0127723	0.116275	down	no
MSTRG.175787	PPP2CA;SKP1;CDKL3;AC104109	ENST00000481195;ENST00000521216;ENST00000353411;ENST00000523054;ENST00000522855;ENST00000522385;ENST00000518990;ENST00000522552;ENST00000520417;ENST00000328392;ENST00000523082;ENST00000521755;ENST00000519321;ENST00000521118;ENST00000523832;ENST00000265334;ENST00000519718	0.758329	-0.399104	0.0128048	0.116275	down	no
MSTRG.102174	RPS15	ENST00000592623;ENST00000593052;ENST00000586656;ENST00000233609;ENST00000591804;ENST00000586686;ENST00000585665;ENST00000592588;ENST00000586096;ENST00000589656	0.684616	-0.546633	0.012805	0.116275	down	no
MSTRG.162574	SCOC	ENST00000614192;ENST00000394201;ENST00000506322;ENST00000394205;ENST00000510586;ENST00000512749;ENST00000506597;ENST00000502535;ENST00000394203	0.574838	-0.798773	0.012853	0.116275	down	no
MSTRG.42512	TSG101	ENST00000251968;ENST00000536719	0.926093	-0.110771	0.0128678	0.116275	down	no
MSTRG.175815	CAMLG	ENST00000297156;ENST00000514518	0.657493	-0.604954	0.012883	0.116275	down	no
MSTRG.55889	GDF11	ENST00000257868;ENST00000546799	1.58621	0.665582	0.012969	0.116275	up	no
MSTRG.43662	HIPK3	ENST00000303296;ENST00000531504;ENST00000525975;ENST00000379016;ENST00000456517	0.718921	-0.476095	0.012993	0.116275	down	no
MSTRG.17119	TMEM59	ENST00000371344;ENST00000371341;ENST00000371348;ENST00000234831;ENST00000452421;ENST00000440019;ENST00000371337;ENST00000420738	0.51549	-0.955984	0.0130318	0.116275	down	no
MSTRG.50098	PHLDB1	ENST00000532639;ENST00000534140;ENST00000361417;ENST00000356063;ENST00000530708	1.58732	0.666589	0.013037	0.116275	up	no
MSTRG.214543	RNF139	ENST00000303545;ENST00000517684	0.741352	-0.43177	0.013039	0.116275	down	no
MSTRG.203142	PTN	ENST00000348225;ENST00000393083	5.17636	2.37194	0.0130657	0.116275	up	no
MSTRG.59148	USP44	ENST00000258499;ENST00000537435;ENST00000393091;ENST00000552440;ENST00000551837;ENST00000549639	0.597141	-0.743855	0.0131397	0.116275	down	no
MSTRG.131966	NRIP1	ENST00000400202;ENST00000638122;ENST00000318948;ENST00000411932;ENST00000400199	0.745256	-0.424192	0.0131647	0.116275	down	no
MSTRG.196263	INHBA	ENST00000242208;ENST00000442711;ENST00000638023	0.528385	-0.92034	0.0132385	0.116275	down	no
MSTRG.68976	OR4K1	ENST00000285600	0.00145656	-9.42321	0.0132407	0.116275	down	no
MSTRG.17963	IL12RB2	ENST00000371000;ENST00000544434;ENST00000674203;ENST00000648487;ENST00000262345;ENST00000541374	0.771265	-0.374702	0.0132419	0.116275	down	no
MSTRG.110869	YIPF4	ENST00000238831;ENST00000441084	0.828641	-0.271181	0.0132867	0.116275	down	no
MSTRG.53219	SLCO1A2	ENST00000307378	0.0165711	-5.91518	0.0133194	0.116275	down	no
MSTRG.22684	RBM8A;PEX11B	ENST00000583313;ENST00000369307;ENST00000537888;ENST00000428634;ENST00000369306	0.790025	-0.340029	0.013333	0.116275	down	no
MSTRG.139055	GALNT15	ENST00000339732;ENST00000617544;ENST00000437509;ENST00000650034	0.638458	-0.647337	0.0134279	0.116275	down	no
MSTRG.70203	SPTSSA	ENST00000298130	0.664573	-0.589499	0.0134313	0.116275	down	no
MSTRG.217334	SLC24A2	ENST00000341998	0.332521	-1.58848	0.0134336	0.116275	down	no
MSTRG.136351	CACNG2	ENST00000300105	0.00229245	-8.76889	0.0134432	0.116275	down	no
ENSG00000177468	OLIG3	ENST00000367734	0.00212126	-8.88086	0.0134432	0.116275	down	no
MSTRG.32792	NEBL	ENST00000417816;ENST00000676125;ENST00000473616;ENST00000377122	0.515079	-0.957135	0.0134506	0.116275	down	no
MSTRG.91809	GOSR1	ENST00000581721;ENST00000225724;ENST00000451249;ENST00000467337;ENST00000414833	0.908056	-0.139146	0.0134813	0.116275	down	no
MSTRG.319	PRKX	ENST00000262848	2.43923	1.28643	0.0135193	0.116275	up	no
MSTRG.96325	DCXR	ENST00000306869;ENST00000582900;ENST00000577712;ENST00000577532;ENST00000581584	0.671744	-0.574016	0.0135999	0.116275	down	no
MSTRG.55509	TMDD1	ENST00000642069	0.512204	-0.96521	0.0136017	0.116275	down	no
MSTRG.218912	POLR1E	ENST00000377792;ENST00000377798	1.0395	0.0558955	0.0136118	0.116275	up	no
MSTRG.151249	CLDN16	ENST00000264734	0.00101456	-9.94493	0.0136208	0.116275	down	no
MSTRG.129665	MATN4	ENST00000360607;ENST00000372754;ENST00000353917;ENST00000537548;ENST00000372756	4.86063	2.28114	0.0136618	0.116275	up	no
MSTRG.106894	IGFL4	ENST00000601672;ENST00000377697	0.21793	-2.19806	0.0136785	0.116275	down	no
MSTRG.94810	METTL2A	ENST00000616852;ENST00000311506	0.809221	-0.305395	0.0137395	0.116275	down	no
MSTRG.191034	EPM2A	ENST00000450221;ENST00000638262;ENST00000638717;ENST00000638778;ENST00000639423;ENST00000367519	0.920123	-0.120102	0.0137578	0.116275	down	no
MSTRG.92412	CCL16	ENST00000611905	626.895	9.29208	0.0137619	0.116275	up	no
MSTRG.108548	ADI1	ENST00000327435;ENST00000415131;ENST00000382093	0.739349	-0.435673	0.0138757	0.116275	down	no
MSTRG.159478	C4orf17	ENST00000514652	0.230119	-2.11955	0.0139077	0.116275	down	no
MSTRG.200390	NYAP1	ENST00000300179;ENST00000454988	0.508239	-0.976421	0.013941	0.116275	down	no
MSTRG.196548	PURB	ENST00000395699	0.789737	-0.340556	0.0139828	0.116275	down	no
MSTRG.149846	SKIL	ENST00000476188;ENST00000413427;ENST00000426052	0.852072	-0.230953	0.014014	0.116275	down	no
MSTRG.46760	RPS3	ENST00000528847;ENST00000527446;ENST00000524851;ENST00000422465;ENST00000531188;ENST00000278572;ENST00000530164;ENST00000525933	0.58472	-0.774182	0.014019	0.116275	down	no
MSTRG.94765	TBX2	ENST00000240328	3.78638	1.92082	0.0140239	0.116275	up	no
MSTRG.71796	GNPNAT1	ENST00000216410;ENST00000557604	0.734507	-0.445152	0.0140246	0.116275	down	no
MSTRG.69121	OR10G3	ENST00000641185	0.00264169	-8.56432	0.0140817	0.116275	down	no
MSTRG.44583	DDB2	ENST00000256996;ENST00000378600;ENST00000378603;ENST00000622878	2.07558	1.05352	0.0141082	0.116275	up	no
MSTRG.38749	RPEL1	ENST00000441178	0.471033	-1.0861	0.0141294	0.116275	down	no
MSTRG.152809	SH3TC1	ENST00000245105;ENST00000508641;ENST00000512966;ENST00000457650	0.763868	-0.388604	0.0142085	0.116275	down	no
MSTRG.107972	NLRP4	ENST00000587891;ENST00000301295	0.00384677	-8.02214	0.0142275	0.116275	down	no
MSTRG.202087	NDUFA5	ENST00000618945;ENST00000471770;ENST00000355749;ENST00000470123;ENST00000378795	0.592542	-0.75501	0.0142709	0.116275	down	no
MSTRG.129746	ZSWIM1	ENST00000372523	0.70653	-0.501177	0.0142741	0.116275	down	no
MSTRG.206788	ADAM7	ENST00000380789;ENST00000441335;ENST00000520720	0.178003	-2.49003	0.0142841	0.116275	down	no
MSTRG.199522	FAM237B	ENST00000637645	0.616031	-0.698925	0.014289	0.116275	down	no
MSTRG.14214	NCMAP	ENST00000374392	0.346228	-1.5302	0.014358	0.116275	down	no
MSTRG.155637	NIPAL1	ENST00000295461	0.501718	-0.99505	0.0144538	0.116275	down	no
MSTRG.110296	RAB10	ENST00000264710	0.738854	-0.436639	0.0145221	0.116275	down	no
MSTRG.113927	TTC31	ENST00000414247;ENST00000233623;ENST00000410003	1.60318	0.680938	0.0145345	0.116275	up	no
MSTRG.125595	COPS7B	ENST00000410024;ENST00000410017;ENST00000620578;ENST00000350033;ENST00000373608	1.65051	0.722909	0.0145694	0.116275	up	no
MSTRG.28646	RRP15	ENST00000366932	0.700926	-0.512667	0.0146845	0.116275	down	no
MSTRG.58190	METTL25	ENST00000550298;ENST00000548200;ENST00000248306;ENST00000550058	0.571216	-0.807892	0.0147107	0.116275	down	no
MSTRG.170685	SGTB	ENST00000381007;ENST00000506816	0.793385	-0.333908	0.0147338	0.116275	down	no
MSTRG.116501	TMEM87B	ENST00000283206;ENST00000650799;ENST00000649734;ENST00000452614	0.557476	-0.843018	0.0147757	0.116275	down	no
MSTRG.99750	SMAD7	ENST00000262158;ENST00000589634;ENST00000591805;ENST00000586093	1.67429	0.743552	0.0148713	0.116275	up	no
MSTRG.111151	CEBPZOS	ENST00000402297;ENST00000392061;ENST00000397064;ENST00000397226;ENST00000406711	0.810142	-0.303753	0.0149076	0.116275	down	no
MSTRG.11632	MAGEA11	ENST00000412632	0.00357883	-8.1263	0.0149475	0.116275	down	no
MSTRG.141336	PRKAR2A	ENST00000265563;ENST00000454963;ENST00000457914;ENST00000296446;ENST00000438535;ENST00000419216	0.795281	-0.330463	0.0149546	0.116275	down	no
MSTRG.103296	DOCK6	ENST00000294618;ENST00000590680;ENST00000587656;ENST00000588666;ENST00000585904	1.93525	0.952522	0.0149548	0.116275	up	no
MSTRG.98347	DSG2	ENST00000261590;ENST00000585206	0.617758	-0.694885	0.014955	0.116275	down	no
MSTRG.198790	RSBN1L	ENST00000445512;ENST00000334955;ENST00000441514;ENST00000445288	0.91948	-0.121109	0.0149751	0.116275	down	no
ENSG00000198854	C1orf68	ENST00000368775	0.000989797	-9.98058	0.0150132	0.116275	down	no
MSTRG.79338	ALDH1A2	ENST00000347587;ENST00000537372;ENST00000249750;ENST00000559517;ENST00000557967;ENST00000558239;ENST00000561070	0.450239	-1.15124	0.0150403	0.116275	down	no
MSTRG.106068	TIMM50	ENST00000607714;ENST00000597666;ENST00000599794;ENST00000544017;ENST00000594583	0.892534	-0.16402	0.0150708	0.116275	down	no
MSTRG.214438	FBXO32	ENST00000517956;ENST00000443022	1.94114	0.956903	0.0151336	0.116275	up	no
MSTRG.177971	ATP10B	ENST00000327245;ENST00000642502;ENST00000520108	0.273033	-1.87285	0.0151467	0.116275	down	no
MSTRG.29893	MAP10	ENST00000418460	0.782357	-0.354101	0.0151477	0.116275	down	no
MSTRG.113551	C1D	ENST00000355848;ENST00000407324;ENST00000410067	0.438535	-1.18923	0.0151668	0.116275	down	no
MSTRG.80307	GRAMD2A	ENST00000309731;ENST00000570275;ENST00000564129;ENST00000568594	2.45631	1.29649	0.0151878	0.116275	up	no
MSTRG.14246	RUNX3	ENST00000308873;ENST00000399916	2.245	1.16672	0.015206	0.116275	up	no
MSTRG.41316	OR51F2	ENST00000322110	0.00120492	-9.69685	0.0152618	0.116275	down	no
MSTRG.190539	NHSL1	ENST00000343505;ENST00000342260;ENST00000427025;ENST00000491526;ENST00000533765	2.73146	1.44967	0.0152713	0.116275	up	no
MSTRG.157168	UGT2B10	ENST00000265403	0.00278764	-8.48674	0.0152809	0.116275	down	no
MSTRG.223725	PDCL	ENST00000394285;ENST00000436632;ENST00000259467	0.683472	-0.549046	0.0153308	0.116275	down	no
MSTRG.89632	CRK	ENST00000398970;ENST00000300574	0.838488	-0.254138	0.0153394	0.116275	down	no
MSTRG.173303	CHD1	ENST00000614616;ENST00000284049;ENST00000511067	0.831526	-0.266166	0.0153419	0.116275	down	no
MSTRG.18998	IFI44L;IFI44	ENST00000450498;ENST00000446486;ENST00000370751;ENST00000438486;ENST00000370747	3.036	1.60217	0.0153449	0.116275	up	no
MSTRG.38217	CRTAC1	ENST00000370597;ENST00000309155;ENST00000436034;ENST00000413387;ENST00000370591	0.634462	-0.656395	0.015421	0.116275	down	no
MSTRG.181464	H3C1	ENST00000613854	0.735918	-0.442383	0.0154238	0.116275	down	no
MSTRG.93822	SLC35B1	ENST00000649906;ENST00000240333;ENST00000514907;ENST00000511763;ENST00000511657;ENST00000515850	0.849159	-0.235894	0.0154495	0.116275	down	no
MSTRG.123043	AOX1	ENST00000374700;ENST00000454629;ENST00000439380	0.514138	-0.959772	0.0154677	0.116275	down	no
MSTRG.115761	SLC9A4	ENST00000295269	0.0733038	-3.76997	0.0155062	0.116275	down	no
MSTRG.99597	SKOR2	ENST00000425639	0.00429753	-7.86228	0.0155093	0.116275	down	no
ENSG00000183389	OR56A4	ENST00000330728;ENST00000641279;ENST00000641156	0.0338481	-4.88478	0.0155389	0.116275	down	no
MSTRG.192004	TULP4	ENST00000367094;ENST00000367097	0.947314	-0.0780851	0.0155905	0.116275	down	no
MSTRG.224370	C9orf78	ENST00000372447	0.836431	-0.257682	0.0156505	0.116275	down	no
MSTRG.46595	ATG16L2	ENST00000535830;ENST00000540222;ENST00000540567;ENST00000534905;ENST00000321297;ENST00000541367	1.84317	0.88219	0.0156796	0.116275	up	no
MSTRG.69155	RAB2B	ENST00000397762	0.801493	-0.319237	0.0157093	0.116275	down	no
MSTRG.52704	H4-16	ENST00000539745	0.774494	-0.368674	0.0157616	0.116275	down	no
MSTRG.87650	NIP7	ENST00000254940;ENST00000254941;ENST00000562523;ENST00000569637	0.695665	-0.523535	0.015766	0.116275	down	no
ENSG00000176253	OR4K13	ENST00000641664;ENST00000315693	0.0065552	-7.25314	0.0157797	0.116275	down	no
MSTRG.179590	OR2V1	ENST00000641551;ENST00000641318	0.00308849	-8.33888	0.0157797	0.116275	down	no
MSTRG.218644	RUSC2	ENST00000361226;ENST00000455600	1.60171	0.679617	0.0157812	0.116275	up	no
MSTRG.14194	PNRC2	ENST00000334351;ENST00000374468;ENST00000471915;ENST00000579103	0.602529	-0.730897	0.0157981	0.116275	down	no
MSTRG.147449	SLC35G2	ENST00000393079;ENST00000446465	0.776709	-0.364554	0.0158871	0.116275	down	no
MSTRG.95601	RAB37	ENST00000340415;ENST00000392612;ENST00000392610;ENST00000392613;ENST00000392614;ENST00000392615;ENST00000528438	0.672217	-0.573	0.0158874	0.116275	down	no
MSTRG.95753	H3-3B	ENST00000587560;ENST00000254810;ENST00000586270;ENST00000586607;ENST00000587171;ENST00000589599	0.687385	-0.540809	0.01608	0.116275	down	no
MSTRG.84590	COG7	ENST00000563164;ENST00000307149	1.56724	0.648226	0.0160833	0.116275	up	no
MSTRG.89851	UBE2G1	ENST00000396981;ENST00000571953;ENST00000574059;ENST00000572484	0.793324	-0.334019	0.0160866	0.116275	down	no
MSTRG.201429	MDFIC	ENST00000448022;ENST00000393486;ENST00000427207;ENST00000498196;ENST00000423503	0.715064	-0.483856	0.0161577	0.116275	down	no
MSTRG.94452	MRPS23	ENST00000313608;ENST00000578444;ENST00000579380	0.835103	-0.259975	0.0161937	0.116275	down	no
MSTRG.122963	SATB2	ENST00000260926;ENST00000443023;ENST00000428695;ENST00000457245;ENST00000417098;ENST00000614512	2.36548	1.24213	0.0161944	0.116275	up	no
MSTRG.163829	TDO2	ENST00000536354;ENST00000506072	0.396808	-1.33349	0.0162161	0.116275	down	no
MSTRG.117567	TEX51	ENST00000636457	0.00169375	-9.20556	0.0162497	0.116275	down	no
MSTRG.155517	GABRA4	ENST00000264318	0.490805	-1.02678	0.0162545	0.116275	down	no
MSTRG.179706	FOXF2	ENST00000645481	0.469019	-1.09228	0.0162597	0.116275	down	no
MSTRG.68943	OR4N2	ENST00000641240;ENST00000557677;ENST00000315947	0.0146771	-6.09029	0.0162765	0.116275	down	no
MSTRG.109007	HPCAL1	ENST00000620771;ENST00000423674;ENST00000622018;ENST00000613496;ENST00000381765;ENST00000422133;ENST00000307845	1.76674	0.821088	0.0163683	0.116275	up	no
MSTRG.168841	NUP155	ENST00000231498;ENST00000381843;ENST00000513532	0.802097	-0.318152	0.0163783	0.116275	down	no
MSTRG.175521	LYRM7	ENST00000379380;ENST00000507584;ENST00000510516	0.796955	-0.32743	0.0164024	0.116275	down	no
MSTRG.12377	B3GALT6	ENST00000379198	0.747605	-0.419652	0.0164993	0.116275	down	no
MSTRG.45872	LTBP3	ENST00000530866;ENST00000529371;ENST00000532932;ENST00000532661;ENST00000530785;ENST00000301873;ENST00000526927;ENST00000322147;ENST00000527339;ENST00000530426;ENST00000529189	0.71325	-0.48752	0.0165092	0.116275	down	no
MSTRG.83810	SHISA9	ENST00000558583;ENST00000423335;ENST00000639941	0.57328	-0.802688	0.0165362	0.116275	down	no
MSTRG.13614	PADI1	ENST00000375471	0.109856	-3.18632	0.0165555	0.116275	down	no
MSTRG.151528	OPA1	ENST00000646793;ENST00000643329;ENST00000392437;ENST00000445863;ENST00000646544;ENST00000419435;ENST00000392436;ENST00000361828;ENST00000429164;ENST00000361908;ENST00000361150;ENST00000361510;ENST00000645553	0.814537	-0.295948	0.0165615	0.116275	down	no
MSTRG.35842	CTNNA3	ENST00000433211;ENST00000545309;ENST00000494580;ENST00000330298	0.645314	-0.631928	0.0165701	0.116275	down	no
MSTRG.217998	EQTN	ENST00000380032;ENST00000380031	3.56712	1.83476	0.0165748	0.116275	up	no
MSTRG.106039	IFNL1	ENST00000333625	0.000941529	-10.0527	0.0166124	0.116275	down	no
ENSG00000189132	FAM47B	ENST00000329357	0.00237865	-8.71564	0.0166124	0.116275	down	no
MSTRG.15260	ZMYM1	ENST00000650449;ENST00000611874;ENST00000359858	0.780015	-0.358426	0.0166185	0.116275	down	no
MSTRG.153380	FAM200B;BST1	ENST00000422728;ENST00000504137;ENST00000382346;ENST00000514989;ENST00000505785;ENST00000512855;ENST00000505260;ENST00000265016;ENST00000514445;ENST00000503617	0.74367	-0.427266	0.0166312	0.116275	down	no
MSTRG.217818	IZUMO3	ENST00000543880	0.00146578	-9.41411	0.0167471	0.116275	down	no
MSTRG.20792	DPH5	ENST00000488176;ENST00000370109;ENST00000427040;ENST00000342173	0.789983	-0.340106	0.0167701	0.116275	down	no
MSTRG.16579	ELAVL4	ENST00000357083;ENST00000652274;ENST00000463650;ENST00000651347	0.153129	-2.70718	0.0168321	0.116275	down	no
MSTRG.152896	USP17L15	ENST00000456464	0.592517	-0.755071	0.0168499	0.116275	down	no
MSTRG.224636	ADAMTSL2	ENST00000393061;ENST00000651351;ENST00000354484;ENST00000393060	0.56247	-0.830152	0.0168638	0.116275	down	no
MSTRG.127381	ISM1	ENST00000262487	0.692213	-0.530712	0.016957	0.116275	down	no
MSTRG.20216	TMED5	ENST00000370282;ENST00000479918;ENST00000370280	0.726229	-0.461504	0.0169775	0.116275	down	no
MSTRG.176279	PSD2	ENST00000274710;ENST00000651792	2.11576	1.08117	0.0169885	0.116275	up	no
MSTRG.81060	TLNRD1	ENST00000267984	0.851677	-0.231622	0.0169961	0.116275	down	no
MSTRG.134758	MRPL40	ENST00000333130	0.874732	-0.193087	0.0169967	0.116275	down	no
MSTRG.199913	PON3	ENST00000265627;ENST00000451904	0.636734	-0.651238	0.0170087	0.116275	down	no
MSTRG.192249	PACRG	ENST00000337019;ENST00000621363;ENST00000542936;ENST00000534958;ENST00000366888	0.677746	-0.561183	0.0170328	0.116275	down	no
MSTRG.127420	SEL1L2	ENST00000473203;ENST00000284951	0.11535	-3.1159	0.0170425	0.116275	down	no
MSTRG.46659	PGM2L1	ENST00000298198	0.73203	-0.450025	0.0170465	0.116275	down	no
MSTRG.101916	NFATC1	ENST00000545796;ENST00000397790;ENST00000253506;ENST00000586434;ENST00000542384;ENST00000591814;ENST00000592223;ENST00000329101;ENST00000318065;ENST00000427363;ENST00000587635	1.9646	0.974237	0.017047	0.116275	up	no
MSTRG.43157	LIN7C	ENST00000278193	0.525691	-0.927712	0.0171495	0.116275	down	no
MSTRG.56079	B4GALNT1	ENST00000341156;ENST00000547741;ENST00000550764	2.0637	1.04523	0.0171542	0.116275	up	no
MSTRG.40129	IKZF5	ENST00000368886;ENST00000617859	0.837955	-0.255055	0.0171576	0.116275	down	no
MSTRG.81697	KIF7	ENST00000394412	1.67109	0.740794	0.0171628	0.116275	up	no
MSTRG.209167	CYP7A1	ENST00000301645	0.00325044	-8.26515	0.0171852	0.116275	down	no
MSTRG.20317	F3	ENST00000370207;ENST00000334047	2.88688	1.52951	0.0172076	0.116275	up	no
MSTRG.56820	GRIP1	ENST00000359742;ENST00000543172;ENST00000538373;ENST00000542309;ENST00000540433;ENST00000643019;ENST00000536215	0.776047	-0.365785	0.0172198	0.116275	down	no
MSTRG.181827	ZNF311	ENST00000377179	0.520512	-0.941996	0.0172388	0.116275	down	no
MSTRG.152678	AC093323	ENST00000635031	0.868706	-0.20306	0.0172935	0.116275	down	no
MSTRG.70306	SRP54	ENST00000556994;ENST00000555557;ENST00000554803;ENST00000555746;ENST00000546080;ENST00000630962;ENST00000216774	1.03513	0.0498156	0.017321	0.116275	up	no
MSTRG.60186	RAD9B	ENST00000409425;ENST00000409246;ENST00000409300;ENST00000392672;ENST00000409778	0.789709	-0.340607	0.0173583	0.116275	down	no
MSTRG.112947	PEX13;KIAA1841;C2orf74	ENST00000295030;ENST00000401576;ENST00000295031;ENST00000444100;ENST00000612149;ENST00000414712;ENST00000453873;ENST00000356719;ENST00000489686;ENST00000426997;ENST00000464909;ENST00000488469;ENST00000402291	0.868828	-0.202857	0.0173732	0.116275	down	no
ENSG00000197786	OR5B17	ENST00000357377	0.00109035	-9.841	0.0173743	0.116275	down	no
MSTRG.142589	TAFA4	ENST00000295569;ENST00000634242	0.166807	-2.58375	0.0174559	0.116275	down	no
MSTRG.107926	TMEM238	ENST00000444469	0.65807	-0.603688	0.0175046	0.116275	down	no
MSTRG.206700	NKX3-1	ENST00000380871	0.55155	-0.858437	0.0175334	0.116275	down	no
MSTRG.157288	UTP3	ENST00000254803	0.870083	-0.200775	0.0175833	0.116275	down	no
MSTRG.55520	SCN8A	ENST00000354534;ENST00000662684;ENST00000599343;ENST00000546961;ENST00000667214;ENST00000627620	0.771452	-0.374351	0.0176204	0.116275	down	no
MSTRG.99683	IER3IP1;HDHD2	ENST00000256433;ENST00000300605;ENST00000639845;ENST00000590481;ENST00000587388;ENST00000590815;ENST00000588940;ENST00000591480;ENST00000592591	0.614314	-0.702952	0.0176488	0.116275	down	no
MSTRG.55951	NABP2	ENST00000380198;ENST00000447747;ENST00000341463;ENST00000399713;ENST00000267023	0.807756	-0.308008	0.0176553	0.116275	down	no
MSTRG.137074	TSPO	ENST00000337554;ENST00000583777;ENST00000428336;ENST00000396265	0.617626	-0.695195	0.0177015	0.116275	down	no
MSTRG.191510	IYD	ENST00000500320	0.304661	-1.71472	0.0177016	0.116275	down	no
MSTRG.133402	SON	ENST00000436227;ENST00000421541;ENST00000300278;ENST00000381679	0.953074	-0.0693393	0.0177704	0.116275	down	no
MSTRG.73607	ABCD4	ENST00000556971;ENST00000356924;ENST00000556517;ENST00000557588	1.48686	0.572271	0.0178019	0.116275	up	no
MSTRG.22906	NBPF11;NBPF14;NOTCH2NLB	ENST00000614015;ENST00000620240;ENST00000619423;ENST00000615281;ENST00000593495;ENST00000614785;ENST00000606877	1.70082	0.766227	0.0178161	0.116275	up	no
MSTRG.28228	RPS6KC1	ENST00000615329;ENST00000366960;ENST00000543470;ENST00000614059;ENST00000366959;ENST00000543354	0.919909	-0.120437	0.0178342	0.116275	down	no
ENSG00000237388	OR4A47	ENST00000446524	0.00126757	-9.62372	0.0178402	0.116275	down	no
MSTRG.115681	NPAS2	ENST00000451740;ENST00000427413;ENST00000335681;ENST00000448812;ENST00000433408	2.22225	1.15202	0.0178572	0.116275	up	no
MSTRG.105684	ZNF566	ENST00000427002;ENST00000493391;ENST00000587567;ENST00000434377;ENST00000452939;ENST00000392170;ENST00000424129	0.806871	-0.309591	0.0178584	0.116275	down	no
MSTRG.218744	CLTA	ENST00000470744;ENST00000433436;ENST00000540080;ENST00000345519	0.849316	-0.235626	0.0179258	0.116275	down	no
MSTRG.22755	NBPF10;NOTCH2NLA	ENST00000583866;ENST00000362074;ENST00000579793	1.72267	0.784648	0.0179281	0.116275	up	no
MSTRG.36033	MYPN	ENST00000354393;ENST00000373675;ENST00000358913;ENST00000613327	3.92482	1.97263	0.0179556	0.116275	up	no
MSTRG.206168	TUSC3	ENST00000382020;ENST00000503731;ENST00000509380;ENST00000506802;ENST00000511783	0.553279	-0.85392	0.0179705	0.116275	down	no
MSTRG.137117	EFCAB6	ENST00000262726;ENST00000356087;ENST00000396231	0.904629	-0.144601	0.0180047	0.116275	down	no
MSTRG.180131	RREB1	ENST00000471433;ENST00000611109;ENST00000349384;ENST00000379933;ENST00000491191;ENST00000379938;ENST00000467782	1.59365	0.672335	0.0180187	0.116275	up	no
MSTRG.55238	PRPF40B	ENST00000261897;ENST00000548825;ENST00000380281;ENST00000551063	1.97588	0.982492	0.0180459	0.116275	up	no
MSTRG.215981	FOXH1	ENST00000377317	3.77358	1.91593	0.0180498	0.116275	up	no
MSTRG.83064	MTRNR2L4	ENST00000399974	0.596555	-0.745272	0.0180763	0.116275	down	no
MSTRG.83962	BMERB1;MPV17L;AC140504	ENST00000452191;ENST00000396385;ENST00000287594;ENST00000561692;ENST00000568766;ENST00000566490;ENST00000300006;ENST00000565857	1.01543	0.0220913	0.0181182	0.116275	up	no
MSTRG.211763	OTUD6B	ENST00000615618;ENST00000617869;ENST00000404789	0.783639	-0.351739	0.0181375	0.116275	down	no
MSTRG.136813	XPNPEP3	ENST00000357137;ENST00000614001	0.914094	-0.129585	0.0181468	0.116275	down	no
MSTRG.213446	ENY2	ENST00000521688;ENST00000520147;ENST00000521662	0.800833	-0.320426	0.0181487	0.116275	down	no
ENSG00000225110	PNMA6F	ENST00000436629	0.00396566	-7.97822	0.0181705	0.116275	down	no
MSTRG.144411	ARL6	ENST00000463745;ENST00000631834;ENST00000394206;ENST00000462412;ENST00000476753;ENST00000335979	0.608517	-0.71663	0.018203	0.116275	down	no
MSTRG.16939	PRPF38A	ENST00000257181	0.940497	-0.0885046	0.0182057	0.116275	down	no
MSTRG.140848	HIGD1A;HHATL;CCDC13;AC006059	ENST00000321331;ENST00000430190;ENST00000310417;ENST00000452906;ENST00000310232;ENST00000426666;ENST00000441594;ENST00000418900;ENST00000648550;ENST00000455195	0.623622	-0.681257	0.0182912	0.116275	down	no
MSTRG.110101	UBXN2A	ENST00000404924;ENST00000309033	0.895164	-0.159776	0.0183625	0.116275	down	no
MSTRG.59373	SLC25A3	ENST00000401722;ENST00000548847;ENST00000552981;ENST00000547534;ENST00000188376;ENST00000228318;ENST00000550695;ENST00000551265	0.786238	-0.346963	0.0184253	0.116275	down	no
MSTRG.183105	C6orf226	ENST00000408925	0.751797	-0.411585	0.0184476	0.116275	down	no
MSTRG.12035	F8A1	ENST00000610495	0.796349	-0.328527	0.0184559	0.116275	down	no
ENSG00000074317	SNCB	ENST00000614675	0.00413564	-7.91767	0.018457	0.116275	down	no
MSTRG.122725	HECW2	ENST00000644030;ENST00000644978;ENST00000427457;ENST00000644421;ENST00000644256;ENST00000260983	3.22522	1.6894	0.0185144	0.116275	up	no
MSTRG.177259	GPX3	ENST00000521650;ENST00000517973;ENST00000622181;ENST00000388825;ENST00000521632;ENST00000520059	0.508022	-0.977038	0.018532	0.116275	down	no
MSTRG.68425	ABHD13	ENST00000375898	0.636167	-0.652522	0.0185562	0.116275	down	no
MSTRG.126320	C20orf96	ENST00000382369;ENST00000360321;ENST00000400269	1.64118	0.714732	0.0185574	0.116275	up	no
MSTRG.801	SHROOM2	ENST00000380913;ENST00000418909;ENST00000452575	3.05841	1.61278	0.0186029	0.116275	up	no
MSTRG.48116	FAT3	ENST00000525166	3.53463	1.82156	0.0186114	0.116275	up	no
MSTRG.90188	TNFSF12-TNFSF13;TNFSF12;TNFSF13	ENST00000293826;ENST00000293825;ENST00000396545;ENST00000396542;ENST00000438470;ENST00000338784;ENST00000380535;ENST00000349228;ENST00000436057;ENST00000625791	0.798473	-0.324685	0.0186624	0.116275	down	no
MSTRG.107852	KIR2DL3	ENST00000342376	0.00963769	-6.6971	0.0187133	0.116275	down	no
MSTRG.88117	ZFP1	ENST00000332307;ENST00000393430;ENST00000568079;ENST00000464850;ENST00000570010;ENST00000567481	0.759139	-0.397564	0.0187608	0.116275	down	no
MSTRG.149899	EIF5A2	ENST00000295822;ENST00000487522	0.750313	-0.414436	0.0187623	0.116275	down	no
MSTRG.105608	SDHAF1	ENST00000378887	0.675513	-0.565944	0.0188069	0.116275	down	no
ENSG00000214897	PNMA6E	ENST00000445091	0.00410722	-7.92762	0.0188506	0.116275	down	no
MSTRG.38094	TLL2	ENST00000357947	0.563612	-0.827225	0.018884	0.116275	down	no
MSTRG.9308	PGRMC1	ENST00000217971;ENST00000535419	0.545257	-0.874992	0.0189254	0.116275	down	no
MSTRG.78927	ARPP19	ENST00000249822;ENST00000567669;ENST00000566423;ENST00000568196;ENST00000563277;ENST00000561650;ENST00000567830;ENST00000561971;ENST00000564163	0.64009	-0.643654	0.018959	0.116275	down	no
MSTRG.157689	NAAA;SDAD1	ENST00000507187;ENST00000286733;ENST00000356260;ENST00000505594;ENST00000395711;ENST00000507956	0.747532	-0.419793	0.0189751	0.116275	down	no
MSTRG.175057	ZNF608	ENST00000504926;ENST00000306315;ENST00000509799;ENST00000513986;ENST00000613878	1.88494	0.914516	0.0190117	0.116275	up	no
MSTRG.213990	MED30	ENST00000297347	0.610038	-0.713029	0.0190235	0.116275	down	no
MSTRG.145340	NECTIN3	ENST00000485303;ENST00000481766;ENST00000461477;ENST00000493615;ENST00000486596;ENST00000485506;ENST00000491525	0.715841	-0.48229	0.0190262	0.116275	down	no
MSTRG.94015	UTP18	ENST00000225298;ENST00000579261;ENST00000583725	0.682959	-0.550128	0.0190288	0.116275	down	no
MSTRG.76039	XRCC3	ENST00000555055;ENST00000352127;ENST00000554913;ENST00000553332;ENST00000553264;ENST00000554170	1.78479	0.835752	0.019052	0.116275	up	no
MSTRG.107836	LAIR2	ENST00000301202;ENST00000412608	0.0878584	-3.50868	0.0191195	0.116275	down	no
MSTRG.105992	RINL	ENST00000591812;ENST00000598904;ENST00000593424;ENST00000593809	0.674239	-0.568668	0.019133	0.116275	down	no
MSTRG.182253	TNXB;ATF6B	ENST00000479795;ENST00000453203;ENST00000611016;ENST00000442721;ENST00000375244;ENST00000375201;ENST00000375203;ENST00000644971;ENST00000647633;ENST00000451343	0.79411	-0.33259	0.0191341	0.116275	down	no
MSTRG.36143	VPS26A	ENST00000373382;ENST00000263559;ENST00000395098	0.619462	-0.690912	0.019137	0.116275	down	no
MSTRG.84646	ARHGAP17	ENST00000571406;ENST00000455311;ENST00000571843;ENST00000289968;ENST00000573449;ENST00000303665	1.61592	0.692353	0.0191496	0.116275	up	no
MSTRG.15774	CITED4	ENST00000372638	0.628294	-0.670487	0.0191545	0.116275	down	no
MSTRG.169108	RPL37	ENST00000274242;ENST00000509877;ENST00000508493	0.928966	-0.106303	0.0191549	0.116275	down	no
MSTRG.215102	HHLA1;AC100868;OC90	ENST00000434736;ENST00000262283;ENST00000414222;ENST00000254627	0.101695	-3.29767	0.0192425	0.116275	down	no
MSTRG.104043	NR2F6;USHBP1	ENST00000291442;ENST00000596878;ENST00000598309;ENST00000252597	0.759816	-0.396279	0.0192583	0.116275	down	no
MSTRG.13057	SLC25A33	ENST00000302692	0.686282	-0.543126	0.019348	0.116275	down	no
MSTRG.190588	CCDC28A	ENST00000332797;ENST00000611852;ENST00000617445	0.838321	-0.254425	0.019371	0.116275	down	no
MSTRG.197806	ZNF117;ERV3-1	ENST00000620222;ENST00000394323;ENST00000282869	1.78863	0.838851	0.0193875	0.116275	up	no
MSTRG.22998	H4C15	ENST00000579512	0.671142	-0.575311	0.019396	0.116275	down	no
MSTRG.148458	SERP1	ENST00000239944;ENST00000487153;ENST00000491660;ENST00000479209	0.642384	-0.638492	0.01944	0.116275	down	no
MSTRG.38640	FBXL15	ENST00000224862;ENST00000457067;ENST00000369956;ENST00000432590	0.710887	-0.492307	0.0194651	0.116275	down	no
MSTRG.108171	ZNF211	ENST00000407202;ENST00000347302;ENST00000299871;ENST00000541801;ENST00000240731	1.65181	0.724045	0.0194738	0.116275	up	no
MSTRG.157646	CDKL2	ENST00000307465	0.597751	-0.742384	0.0194881	0.116275	down	no
MSTRG.201574	CAPZA2	ENST00000490693;ENST00000361183;ENST00000484325;ENST00000628758	0.591895	-0.756587	0.0195118	0.116275	down	no
MSTRG.167487	TAF11L7	ENST00000640846	0.000745992	-10.3886	0.0195675	0.116275	down	no
MSTRG.47935	TRIM49D1	ENST00000530311	0.00276952	-8.49615	0.0195982	0.116275	down	no
MSTRG.196518	ZMIZ2	ENST00000441627;ENST00000265346;ENST00000413916;ENST00000433667;ENST00000309315;ENST00000615423	1.6573	0.728838	0.0196137	0.116275	up	no
MSTRG.159640	DDIT4L	ENST00000273990;ENST00000502763;ENST00000513992	0.547842	-0.868169	0.0196792	0.116275	down	no
MSTRG.42551	SPTY2D1	ENST00000336349	0.737918	-0.438467	0.0197009	0.116275	down	no
MSTRG.45937	CCDC85B	ENST00000312579	0.677767	-0.561138	0.0197023	0.116275	down	no
MSTRG.63893	GPALPP1	ENST00000611650;ENST00000361121;ENST00000379151;ENST00000357537	0.782526	-0.353789	0.0197294	0.116275	down	no
MSTRG.23091	ECM1;TARS2	ENST00000346569;ENST00000606933;ENST00000369047;ENST00000369064	1.81032	0.856245	0.0198216	0.116275	up	no
MSTRG.141801	ACTR8	ENST00000335754;ENST00000498740;ENST00000482349;ENST00000486794	0.895625	-0.159033	0.0198967	0.116275	down	no
MSTRG.213437	NUDCD1	ENST00000239690;ENST00000427660	0.712017	-0.490017	0.0199257	0.116275	down	no
MSTRG.46017	CCDC87	ENST00000333861	0.543979	-0.878378	0.0199299	0.116275	down	no
MSTRG.20379	TLCD4;RWDD3;TLCD4-RWDD3	ENST00000370203;ENST00000263893;ENST00000455656;ENST00000370202;ENST00000604534;ENST00000456991	0.766841	-0.383002	0.0199394	0.116275	down	no
MSTRG.29356	ACBD3	ENST00000366812	0.844316	-0.244145	0.0199488	0.116275	down	no
MSTRG.58854	BTG1	ENST00000256015	0.54132	-0.885445	0.019949	0.116275	down	no
MSTRG.82773	CACNA1H	ENST00000638323;ENST00000565831;ENST00000358590;ENST00000348261;ENST00000569107	0.511862	-0.966172	0.0199732	0.116275	down	no
ENSG00000181903	OR4C6	ENST00000641251	0.00146366	-9.4162	0.0199842	0.116275	down	no
ENSG00000176547	OR4C3	ENST00000319856	0.00138303	-9.49796	0.0199842	0.116275	down	no
MSTRG.69511	ADCY4;RIPK3	ENST00000554068;ENST00000554569;ENST00000559167;ENST00000418030;ENST00000561138;ENST00000216274;ENST00000556932	2.47711	1.30866	0.0199866	0.116275	up	no
MSTRG.165188	GPM6A	ENST00000280187;ENST00000512897;ENST00000393658;ENST00000509865;ENST00000513667;ENST00000503397;ENST00000505375;ENST00000512610;ENST00000512509;ENST00000506894;ENST00000513365;ENST00000507520;ENST00000502754;ENST00000515090;ENST00000505561;ENST00000507540	0.383453	-1.38288	0.0200027	0.116275	down	no
MSTRG.86513	AMFR	ENST00000290649;ENST00000567738;ENST00000565445;ENST00000492830	0.624878	-0.678354	0.0200049	0.116275	down	no
MSTRG.218405	SMU1	ENST00000397149	0.981931	-0.0263064	0.0200796	0.116275	down	no
MSTRG.224060	GARNL3	ENST00000435213;ENST00000373387;ENST00000446764;ENST00000439286;ENST00000444677	1.70127	0.766615	0.0201332	0.116275	up	no
MSTRG.72688	SYT16	ENST00000568344;ENST00000636133	0.519997	-0.943426	0.0201902	0.116275	down	no
MSTRG.100706	VPS4B	ENST00000238497;ENST00000591519	0.862536	-0.213344	0.0201999	0.116275	down	no
MSTRG.222851	ZNF483	ENST00000309235;ENST00000355824;ENST00000374374;ENST00000358151	0.742263	-0.429998	0.0202324	0.116275	down	no
MSTRG.27386	LAX1	ENST00000442561;ENST00000367217	0.593928	-0.75164	0.0202477	0.116275	down	no
MSTRG.136879	TEF	ENST00000266304;ENST00000406644;ENST00000413942	0.620202	-0.689191	0.0202559	0.116275	down	no
MSTRG.200865	ATXN7L1	ENST00000484475;ENST00000472195;ENST00000419735;ENST00000477775;ENST00000318724	1.58152	0.661307	0.020289	0.116275	up	no
MSTRG.203708	CTAGE15	ENST00000420911	0.817799	-0.290182	0.0203565	0.116275	down	no
MSTRG.15647	BMP8B	ENST00000372827	3.21396	1.68435	0.0203835	0.116275	up	no
MSTRG.98837	FHOD3	ENST00000592128;ENST00000591635;ENST00000590592;ENST00000257209;ENST00000585579;ENST00000592930	2.91648	1.54423	0.0203929	0.116275	up	no
MSTRG.138890	GRIP2	ENST00000619221;ENST00000621039;ENST00000637939	2.02354	1.01688	0.0204116	0.116275	up	no
MSTRG.192883	C6orf120	ENST00000332290	0.748354	-0.418208	0.0204328	0.116275	down	no
MSTRG.130176	NFATC2	ENST00000414705;ENST00000609943;ENST00000371564;ENST00000396009;ENST00000609507	2.56508	1.359	0.0204359	0.116275	up	no
MSTRG.124462	RUFY4	ENST00000374155;ENST00000344321	4.5861	2.19727	0.0204459	0.116275	up	no
MSTRG.140585	SCN11A	ENST00000668754;ENST00000302328;ENST00000444237	0.641787	-0.639834	0.0204475	0.116275	down	no
MSTRG.172582	ARRDC3	ENST00000265138	0.619496	-0.690832	0.0204477	0.116275	down	no
MSTRG.22681	PIAS3;ANKRD35	ENST00000393046;ENST00000463514;ENST00000355594;ENST00000393045;ENST00000544626	1.5786	0.658643	0.0204599	0.116275	up	no
MSTRG.206675	SLC39A14	ENST00000381237;ENST00000289952;ENST00000517370;ENST00000517552;ENST00000524285;ENST00000522881;ENST00000519960;ENST00000520832;ENST00000359741;ENST00000240095;ENST00000520644	0.603133	-0.729452	0.0204986	0.116275	down	no
MSTRG.95976	SYNGR2	ENST00000225777;ENST00000589711;ENST00000588282;ENST00000590201;ENST00000589168	0.748449	-0.418025	0.0205043	0.116275	down	no
MSTRG.137561	PIM3	ENST00000360612	0.711633	-0.490794	0.0205064	0.116275	down	no
MSTRG.36907	PRXL2A	ENST00000606162;ENST00000372185;ENST00000372187;ENST00000615554;ENST00000372181	0.823897	-0.279465	0.0205346	0.116275	down	no
MSTRG.8079	BEX4	ENST00000372691;ENST00000372695	0.440206	-1.18375	0.0206138	0.116275	down	no
MSTRG.19845	GBP6	ENST00000370456	0.268103	-1.89914	0.0206566	0.116275	down	no
MSTRG.205013	KBTBD11	ENST00000320248	0.661072	-0.597122	0.0207289	0.116275	down	no
MSTRG.16271	IPP	ENST00000396478;ENST00000359942	0.82339	-0.280352	0.0207449	0.116275	down	no
MSTRG.141413	AMT;NICN1	ENST00000636188;ENST00000395338;ENST00000436744;ENST00000637682;ENST00000273598;ENST00000637455;ENST00000538581;ENST00000427987;ENST00000273588	1.48505	0.570513	0.0207651	0.116275	up	no
MSTRG.71985	CNIH1	ENST00000216416;ENST00000557690;ENST00000395573;ENST00000553660;ENST00000556113	0.541125	-0.885967	0.0207958	0.116275	down	no
MSTRG.104056	CCDC194	ENST00000636079	3.2977	1.72146	0.0208657	0.116275	up	no
MSTRG.89982	NUP88	ENST00000225696;ENST00000572809;ENST00000573584	0.954551	-0.0671051	0.0208681	0.116275	down	no
ENSG00000170561	IRX2	ENST00000382611;ENST00000302057	2.26575	1.17999	0.0209047	0.116275	up	no
MSTRG.127691	SNX5;OVOL2	ENST00000377768;ENST00000606602;ENST00000278780;ENST00000606557;ENST00000481323;ENST00000463050;ENST00000377759;ENST00000486039;ENST00000431277	0.804916	-0.313089	0.0209282	0.116275	down	no
MSTRG.14154	PITHD1	ENST00000415372;ENST00000246151;ENST00000374524	0.805774	-0.311553	0.0209606	0.116275	down	no
MSTRG.126844	TRMT6	ENST00000453074;ENST00000203001	0.737185	-0.439901	0.0209826	0.116275	down	no
MSTRG.193494	ZNF853	ENST00000457543	0.714155	-0.485691	0.0209928	0.116275	down	no
MSTRG.5377	EDA2R	ENST00000396050;ENST00000374719;ENST00000451436;ENST00000253392	2.41312	1.2709	0.0210407	0.116275	up	no
MSTRG.3663	SLC9A7	ENST00000616978;ENST00000328306	0.761178	-0.393693	0.0210566	0.116275	down	no
MSTRG.31168	PGBD2	ENST00000329291;ENST00000355360	0.759985	-0.395957	0.021067	0.116275	down	no
MSTRG.130914	PHACTR3	ENST00000359926;ENST00000434923;ENST00000371015;ENST00000492611	0.653954	-0.61274	0.0210811	0.116275	down	no
MSTRG.113569	PNO1	ENST00000263657	0.855328	-0.225451	0.0210901	0.116275	down	no
MSTRG.207091	SARAF	ENST00000523127;ENST00000256255;ENST00000518296;ENST00000545648;ENST00000522794;ENST00000521265	0.69844	-0.517792	0.0211134	0.116275	down	no
MSTRG.12533	MMEL1	ENST00000378412	0.3232	-1.6295	0.0211562	0.116275	down	no
MSTRG.29201	CNIH4	ENST00000465271;ENST00000366857;ENST00000366856;ENST00000366858	0.771666	-0.373952	0.0211742	0.116275	down	no
MSTRG.91808	CPD	ENST00000225719;ENST00000543464	0.657749	-0.60439	0.0211944	0.116275	down	no
MSTRG.80081	CORO2B	ENST00000540068;ENST00000261861;ENST00000543950	1.86293	0.897572	0.021202	0.116275	up	no
ENSG00000181958	OR4A15	ENST00000641526;ENST00000314706	0.00142627	-9.45353	0.0212208	0.116275	down	no
MSTRG.86619	ARL2BP	ENST00000563234;ENST00000219204	0.587241	-0.767976	0.021249	0.116275	down	no
MSTRG.36325	C10orf105	ENST00000398786;ENST00000441508	0.671579	-0.57437	0.0213088	0.116275	down	no
MSTRG.75038	CPSF2	ENST00000553427;ENST00000298875;ENST00000555244	0.830586	-0.267798	0.0213207	0.116275	down	no
MSTRG.8034	TCEAL6	ENST00000372774;ENST00000372773	0.520272	-0.942663	0.0213207	0.116275	down	no
MSTRG.106976	PTGIR	ENST00000291294;ENST00000597185	0.732951	-0.448211	0.0213429	0.116275	down	no
MSTRG.124976	MRPL44	ENST00000258383	0.871502	-0.198424	0.0213648	0.116275	down	no
MSTRG.137291	ATXN10	ENST00000381061;ENST00000252934;ENST00000640901;ENST00000435026;ENST00000402380	0.685239	-0.545321	0.0213687	0.116275	down	no
MSTRG.19445	SAMD13	ENST00000370671;ENST00000370673;ENST00000370669;ENST00000370670;ENST00000454967	0.584085	-0.775751	0.0213771	0.116275	down	no
MSTRG.29476	JMJD4	ENST00000615711;ENST00000366758;ENST00000438896;ENST00000620518	0.724332	-0.465277	0.0213819	0.116275	down	no
MSTRG.179512	SQSTM1	ENST00000626660;ENST00000360718;ENST00000514093;ENST00000422245;ENST00000389805	0.876078	-0.190868	0.021385	0.116275	down	no
ENSG00000187823	RTL4	ENST00000340433	0.00343231	-8.1866	0.0213887	0.116275	down	no
MSTRG.78104	TMEM62;CCNDBP1	ENST00000260403;ENST00000564494;ENST00000300213;ENST00000565291;ENST00000564698	0.936766	-0.0942397	0.0213926	0.116275	down	no
MSTRG.107130	SULT2B1	ENST00000323090	0.285811	-1.80687	0.0214147	0.116275	down	no
MSTRG.74510	FLRT2	ENST00000554746;ENST00000330753	2.54598	1.34822	0.0214385	0.116275	up	no
MSTRG.171312	FAM169A	ENST00000389156;ENST00000506954;ENST00000514200	0.457607	-1.12782	0.0215264	0.116275	down	no
MSTRG.82030	MCTP2	ENST00000557742;ENST00000451018;ENST00000543482;ENST00000357742	0.691743	-0.531692	0.0215392	0.116275	down	no
MSTRG.189972	AKAP7	ENST00000342266;ENST00000263050;ENST00000431975;ENST00000474850;ENST00000537868	0.871656	-0.19817	0.021542	0.116275	down	no
MSTRG.195035	NFE2L3	ENST00000607375;ENST00000056233	0.558721	-0.8398	0.0215581	0.116275	down	no
MSTRG.179747	MYLK4	ENST00000274643;ENST00000647417	0.701604	-0.511271	0.0216101	0.116275	down	no
MSTRG.94516	HSF5	ENST00000323777	0.60795	-0.717976	0.0216118	0.116275	down	no
MSTRG.157449	RASSF6	ENST00000307439	0.00901633	-6.79324	0.0216338	0.116275	down	no
MSTRG.37946	TBC1D12	ENST00000225235	0.862119	-0.214041	0.0216494	0.116275	down	no
MSTRG.151665	PPP1R2	ENST00000618156;ENST00000438848	0.616543	-0.697726	0.0216506	0.116275	down	no
MSTRG.129667	SDC4	ENST00000372733	0.695345	-0.524199	0.0216725	0.116275	down	no
MSTRG.190410	PDE7B	ENST00000446774;ENST00000615259;ENST00000308191	0.734716	-0.44474	0.021678	0.116275	down	no
MSTRG.23011	SV2A	ENST00000369145;ENST00000369146	0.74973	-0.415558	0.0216914	0.116275	down	no
MSTRG.83912	NPIPA3	ENST00000526520;ENST00000552140	1.83025	0.872043	0.0217421	0.116275	up	no
MSTRG.85210	ZNF771	ENST00000434417;ENST00000566625;ENST00000319296;ENST00000564550	0.9044	-0.144967	0.0218007	0.116275	down	no
MSTRG.147812	TRPC1	ENST00000476941;ENST00000273482	0.854928	-0.226125	0.0218009	0.116275	down	no
MSTRG.137876	TRNT1	ENST00000339437;ENST00000413000;ENST00000420393;ENST00000251607;ENST00000402675;ENST00000397779	0.847378	-0.238923	0.0218074	0.116275	down	no
MSTRG.42025	MICAL2	ENST00000256194;ENST00000530823;ENST00000526065;ENST00000524685;ENST00000527546;ENST00000532179;ENST00000525119;ENST00000533389;ENST00000533534;ENST00000528931;ENST00000529028;ENST00000532420	1.8877	0.916628	0.0218605	0.116275	up	no
MSTRG.29848	EGLN1	ENST00000366641;ENST00000667629;ENST00000658954;ENST00000670301	0.625011	-0.678047	0.0219055	0.116275	down	no
MSTRG.72247	EXOC5	ENST00000621441;ENST00000340918;ENST00000413566;ENST00000556318	0.645771	-0.630906	0.0219389	0.116275	down	no
MSTRG.217567	DMRTA1	ENST00000325870	0.47878	-1.06257	0.021971	0.116275	down	no
MSTRG.34896	ASAH2B	ENST00000643851;ENST00000374007;ENST00000647317	0.732051	-0.449983	0.0219884	0.116275	down	no
MSTRG.48708	CFAP300	ENST00000434758;ENST00000526781;ENST00000534360;ENST00000529204	0.848862	-0.236398	0.0219973	0.116275	down	no
MSTRG.214561	MTSS1	ENST00000524090;ENST00000523179;ENST00000518547;ENST00000431961;ENST00000325064;ENST00000522162	2.10025	1.07056	0.0220194	0.116275	up	no
MSTRG.105581	ARHGAP33	ENST00000378944;ENST00000588248	1.84898	0.886729	0.022022	0.116275	up	no
MSTRG.85265	CTF1	ENST00000279804;ENST00000395019	0.694324	-0.526319	0.02206	0.116275	down	no
MSTRG.45320	MS4A10	ENST00000308287	0.00343368	-8.18603	0.0221173	0.116275	down	no
MSTRG.197656	ZNF722P	ENST00000330020	0.00205555	-8.92626	0.0221173	0.116275	down	no
MSTRG.39475	TCF7L2	ENST00000542695;ENST00000466338;ENST00000355995;ENST00000349937;ENST00000369397;ENST00000545257;ENST00000629706;ENST00000543371;ENST00000627217;ENST00000346198;ENST00000536810;ENST00000369395;ENST00000369386;ENST00000369389;ENST00000538897;ENST00000355717;ENST00000277945;ENST00000637574;ENST00000352065	1.61927	0.695347	0.0221362	0.116275	up	no
MSTRG.130628	FAM210B	ENST00000371384;ENST00000437418	0.65658	-0.606957	0.0221427	0.116275	down	no
MSTRG.195083	HOXA13	ENST00000649031	0.635578	-0.653859	0.0221863	0.116275	down	no
MSTRG.97285	CIDEA	ENST00000320477	0.42969	-1.21863	0.0221967	0.116275	down	no
MSTRG.34806	C10orf53	ENST00000374113;ENST00000374112	0.1102	-3.18181	0.0222114	0.116275	down	no
MSTRG.21582	LAMTOR5	ENST00000614544;ENST00000602318;ENST00000602858;ENST00000474861;ENST00000483260	0.625085	-0.677875	0.0222145	0.116275	down	no
MSTRG.22990	H4C14	ENST00000578186	0.665094	-0.588369	0.022215	0.116275	down	no
MSTRG.105549	CD22	ENST00000085219;ENST00000598537;ENST00000341773;ENST00000594250;ENST00000613136;ENST00000593867;ENST00000597916;ENST00000600131;ENST00000544992	0.232579	-2.10421	0.0222281	0.116275	down	no
MSTRG.140524	RPSA	ENST00000444512;ENST00000301821;ENST00000458478;ENST00000443003	0.693697	-0.527623	0.0222411	0.116275	down	no
MSTRG.151875	SENP5	ENST00000323460;ENST00000448068;ENST00000445299;ENST00000419026	0.930254	-0.104303	0.022317	0.116275	down	no
ENSG00000204882	GPR20	ENST00000377741	20.7014	4.37166	0.0223279	0.116275	up	no
MSTRG.74967	CCDC88C	ENST00000556726;ENST00000553403;ENST00000389857;ENST00000389856	3.4272	1.77703	0.0223488	0.116275	up	no
MSTRG.48134	SLC36A4	ENST00000534116;ENST00000529184;ENST00000326402	0.614007	-0.703673	0.0223586	0.116275	down	no
MSTRG.222876	GNG10;DNAJC25;DNAJC25-GNG10	ENST00000374293;ENST00000313525;ENST00000374294	0.729738	-0.454549	0.0223936	0.116275	down	no
MSTRG.151746	TFRC	ENST00000360110;ENST00000392396;ENST00000426789;ENST00000420415	0.663636	-0.591537	0.0224178	0.116275	down	no
MSTRG.104140	ARRDC2	ENST00000222250;ENST00000593560;ENST00000379656	1.7441	0.802486	0.0224188	0.116275	up	no
MSTRG.174385	TMED7-TICAM2;TMED7;TICAM2	ENST00000333314;ENST00000282382;ENST00000456936;ENST00000427199	0.572662	-0.804245	0.0224321	0.116275	down	no
MSTRG.158849	FAM13A	ENST00000509094;ENST00000508369;ENST00000503556;ENST00000515600;ENST00000395002;ENST00000264344;ENST00000513837;ENST00000506913	1.70186	0.767115	0.0224703	0.116275	up	no
MSTRG.96491	USP14	ENST00000261601;ENST00000581983;ENST00000582707;ENST00000400266;ENST00000580410	0.753406	-0.4085	0.0224982	0.116275	down	no
MSTRG.188180	OSTM1	ENST00000193322;ENST00000440575	0.613217	-0.70553	0.0225006	0.116275	down	no
MSTRG.86065	CNEP1R1	ENST00000458059;ENST00000566093;ENST00000562576;ENST00000565556;ENST00000427478	0.844908	-0.243134	0.0225511	0.116275	down	no
MSTRG.158384	THAP9	ENST00000302236	0.777009	-0.363997	0.0225683	0.116275	down	no
MSTRG.220586	SPATA31D4	ENST00000419782	0.00686125	-7.18731	0.0225893	0.116275	down	no
MSTRG.138509	IL17RE	ENST00000383814;ENST00000421412;ENST00000454190	1.86913	0.902369	0.0225939	0.116275	up	no
MSTRG.106020	NFKBIB	ENST00000572515;ENST00000392079;ENST00000313582	0.866576	-0.206602	0.0227145	0.116275	down	no
MSTRG.123639	KLF7	ENST00000412414;ENST00000309446;ENST00000435602;ENST00000426163;ENST00000423015;ENST00000421199;ENST00000458272	2.01004	1.00723	0.0227275	0.116275	up	no
MSTRG.43093	FIBIN	ENST00000318627	0.551829	-0.857707	0.0227709	0.116275	down	no
MSTRG.135262	CABIN1	ENST00000337989;ENST00000445422;ENST00000405822;ENST00000263119;ENST00000454754;ENST00000617531;ENST00000398319	1.57917	0.659169	0.0227823	0.116275	up	no
MSTRG.165838	SLC25A4	ENST00000281456	0.897122	-0.156625	0.0227849	0.116275	down	no
MSTRG.121346	HNRNPA3	ENST00000411529;ENST00000392524;ENST00000435711	0.932316	-0.101108	0.0228368	0.116275	down	no
MSTRG.179258	FGFR4	ENST00000510911;ENST00000292408;ENST00000513166;ENST00000393648;ENST00000514472;ENST00000393637;ENST00000503708	0.514208	-0.959575	0.0229029	0.116275	down	no
MSTRG.185142	RIMS1	ENST00000264839;ENST00000517960;ENST00000521978;ENST00000491071;ENST00000522211;ENST00000425662;ENST00000517827;ENST00000414192;ENST00000401910	0.609116	-0.715212	0.0229123	0.116275	down	no
MSTRG.57338	THAP2;TMEM19	ENST00000308086;ENST00000266673;ENST00000549735;ENST00000546677;ENST00000550787;ENST00000546795;ENST00000551488;ENST00000547843;ENST00000551238	0.733677	-0.446782	0.0230008	0.116275	down	no
MSTRG.55635	CSAD	ENST00000498635;ENST00000379843;ENST00000267085;ENST00000548698;ENST00000379846;ENST00000453446;ENST00000444623	1.86799	0.90149	0.0230033	0.116275	up	no
MSTRG.12412	VWA1	ENST00000476993;ENST00000338660;ENST00000495558;ENST00000471398	0.665353	-0.587807	0.0230184	0.116275	down	no
MSTRG.51795	ANO2	ENST00000327087;ENST00000612575;ENST00000546188;ENST00000545860	2.74667	1.45768	0.0230445	0.116275	up	no
MSTRG.126003	TRAF3IP1	ENST00000373327;ENST00000391993	0.886858	-0.173224	0.023047	0.116275	down	no
ENSG00000184022	OR2T10	ENST00000642090;ENST00000330500	0.00516454	-7.59714	0.0230784	0.116275	down	no
MSTRG.136915	DESI1	ENST00000263256	0.883716	-0.178346	0.0230903	0.116275	down	no
MSTRG.13232	FBXO2	ENST00000354287	0.674353	-0.568425	0.0231101	0.116275	down	no
MSTRG.219690	ANKRD20A1	ENST00000642071;ENST00000562196	0.445833	-1.16542	0.0231114	0.116275	down	no
MSTRG.13803	UBXN10	ENST00000375099	0.749746	-0.415527	0.0231365	0.116275	down	no
MSTRG.117165	GLI2	ENST00000452319;ENST00000418323;ENST00000482119;ENST00000361492	1.61786	0.694085	0.0231392	0.116275	up	no
MSTRG.11920	HAUS7;TREX2	ENST00000370211;ENST00000370231;ENST00000330912;ENST00000370210;ENST00000334497;ENST00000435662;ENST00000370232;ENST00000626181	1.72089	0.783156	0.0231472	0.116275	up	no
MSTRG.159834	CXXC4	ENST00000394767	0.545862	-0.873393	0.0231686	0.116275	down	no
MSTRG.188341	PPIL6	ENST00000521072;ENST00000520723;ENST00000424445;ENST00000417394;ENST00000440797	0.813032	-0.298616	0.0232182	0.116275	down	no
MSTRG.206131	DLC1	ENST00000520226;ENST00000517868;ENST00000512044;ENST00000316609;ENST00000511869;ENST00000276297;ENST00000358919	1.78863	0.838853	0.0232383	0.116275	up	no
MSTRG.128114	THBD	ENST00000377103	0.661272	-0.596684	0.0232453	0.116275	down	no
MSTRG.41861	SWAP70	ENST00000318950;ENST00000534662;ENST00000447399	0.882071	-0.181033	0.0232588	0.116275	down	no
ENSG00000155495	MAGEC1	ENST00000285879	0.00552526	-7.49974	0.0232823	0.116275	down	no
MSTRG.224357	TOR1B	ENST00000427860;ENST00000259339	0.916965	-0.125061	0.0232843	0.116275	down	no
MSTRG.63902	KCTD4	ENST00000379108	0.598101	-0.741539	0.0232889	0.116275	down	no
MSTRG.149782	LRRC34	ENST00000446859	0.751222	-0.412689	0.0232938	0.116275	down	no
MSTRG.188535	FYN	ENST00000368682;ENST00000538466;ENST00000354650;ENST00000518295;ENST00000462856;ENST00000518630;ENST00000368667;ENST00000523570;ENST00000229471;ENST00000462598;ENST00000523238;ENST00000524310;ENST00000487824;ENST00000523574;ENST00000517419;ENST00000520518	2.09497	1.06693	0.0233303	0.116275	up	no
MSTRG.138545	VHL	ENST00000256474;ENST00000345392	0.769869	-0.377316	0.0233845	0.116275	down	no
MSTRG.25717	QSOX1	ENST00000367600;ENST00000443059;ENST00000367602	0.652691	-0.615527	0.0233988	0.116275	down	no
MSTRG.203572	DENND11	ENST00000536163;ENST00000482493	1.47426	0.559992	0.023423	0.116275	up	no
MSTRG.86528	NUDT21	ENST00000566340;ENST00000300291;ENST00000568822	0.678703	-0.559148	0.0234639	0.116275	down	no
MSTRG.13323	HNRNPCL3	ENST00000617807	0.00163357	-9.25776	0.0235016	0.116275	down	no
MSTRG.51903	LAG3;PTMS	ENST00000203629;ENST00000389462;ENST00000441671;ENST00000309083	0.784452	-0.350243	0.0235023	0.116275	down	no
MSTRG.39259	SMNDC1	ENST00000369603;ENST00000369592	0.723136	-0.467661	0.0236067	0.116275	down	no
MSTRG.59731	NFYB	ENST00000551727;ENST00000551446;ENST00000240055	0.880778	-0.18315	0.023609	0.116275	down	no
MSTRG.25654	SOAT1	ENST00000367619;ENST00000426956;ENST00000540564	0.747448	-0.419954	0.0236166	0.116275	down	no
MSTRG.200997	CCDC71L	ENST00000523505	0.683154	-0.549717	0.0236371	0.116275	down	no
MSTRG.171194	UTP15	ENST00000543251;ENST00000508686;ENST00000296792	0.781895	-0.354954	0.0236545	0.116275	down	no
MSTRG.33179	MYO3A	ENST00000642920;ENST00000478093;ENST00000376302	0.507909	-0.977359	0.0236939	0.116275	down	no
MSTRG.89899	MINK1	ENST00000664602;ENST00000355280;ENST00000576037;ENST00000453408	1.54287	0.625615	0.0238087	0.116275	up	no
MSTRG.167489	TAF11L8	ENST00000640803	0.000895734	-10.1246	0.0238241	0.116275	down	no
MSTRG.5500	YIPF6	ENST00000462683;ENST00000374622;ENST00000451537	0.690884	-0.533486	0.0238793	0.116275	down	no
MSTRG.10645	CT55	ENST00000344129	0.0849349	-3.5575	0.0238835	0.116275	down	no
MSTRG.45817	MRPL49	ENST00000279242;ENST00000526171;ENST00000533943;ENST00000534078	0.706764	-0.5007	0.0238867	0.116275	down	no
MSTRG.67051	SLITRK5	ENST00000325089	0.208637	-2.26093	0.0238923	0.116275	down	no
MSTRG.50020	MPZL3	ENST00000278949	0.628878	-0.669148	0.0239095	0.116275	down	no
MSTRG.206264	CNOT7	ENST00000361272;ENST00000524358;ENST00000518541;ENST00000523917;ENST00000519918	0.674155	-0.568848	0.0239099	0.116275	down	no
MSTRG.10599	MOSPD1	ENST00000370783;ENST00000370779;ENST00000370777	0.619666	-0.690438	0.023934	0.116275	down	no
MSTRG.14394	LIN28A	ENST00000326279;ENST00000254231	0.45192	-1.14586	0.0239556	0.116275	down	no
MSTRG.36794	EIF5AL1	ENST00000520547	0.656302	-0.607569	0.0240373	0.116275	down	no
MSTRG.168683	DNAJC21	ENST00000382021;ENST00000648817;ENST00000644357;ENST00000642675	0.906837	-0.141085	0.0240442	0.116275	down	no
MSTRG.110465	C2orf16	ENST00000408964;ENST00000447166	0.879649	-0.185	0.0240528	0.116275	down	no
MSTRG.188907	KPNA5	ENST00000368564;ENST00000413340;ENST00000356348	0.780942	-0.356712	0.0240619	0.116275	down	no
MSTRG.62496	MTMR6	ENST00000381801	0.679035	-0.558442	0.0240644	0.116275	down	no
MSTRG.69493	NRL	ENST00000397002;ENST00000396997;ENST00000561028;ENST00000558280;ENST00000396995	0.738858	-0.436631	0.0240737	0.116275	down	no
MSTRG.14189	IFNLR1	ENST00000327535;ENST00000374419;ENST00000374418;ENST00000327575	0.664875	-0.588844	0.0240827	0.116275	down	no
MSTRG.40881	PGGHG	ENST00000409548;ENST00000409479;ENST00000397660;ENST00000409655	1.79334	0.842645	0.0241645	0.116275	up	no
MSTRG.169958	CDC20B	ENST00000296733;ENST00000381375	4.68552	2.22821	0.0242078	0.116275	up	no
MSTRG.107263	TRPM4	ENST00000597316;ENST00000599628;ENST00000252826;ENST00000598691	1.91756	0.939274	0.0242257	0.116275	up	no
MSTRG.155206	TMEM33	ENST00000508448;ENST00000504986;ENST00000325094;ENST00000513558;ENST00000513702	0.748743	-0.417458	0.0242428	0.116275	down	no
MSTRG.71680	ATL1	ENST00000674503;ENST00000556478;ENST00000557735;ENST00000441560	0.874879	-0.192845	0.0242802	0.116275	down	no
MSTRG.79933	TIPIN	ENST00000261881;ENST00000562124;ENST00000570251;ENST00000568216	0.806054	-0.311052	0.0242898	0.116275	down	no
MSTRG.184121	HMGCLL1	ENST00000428842;ENST00000274901;ENST00000398661	0.436187	-1.19698	0.0243208	0.116275	down	no
MSTRG.187923	POPDC3	ENST00000254765;ENST00000429112	0.681374	-0.553481	0.0243315	0.116275	down	no
MSTRG.186457	NT5E	ENST00000369651;ENST00000257770;ENST00000369646;ENST00000416334;ENST00000437581	0.588517	-0.764843	0.0243555	0.116275	down	no
MSTRG.27657	IL10	ENST00000423557;ENST00000659065;ENST00000471071;ENST00000659642	0.638486	-0.647274	0.024361	0.116275	down	no
MSTRG.115558	MRPL30;AC092587;LIPT1;C2orf15	ENST00000338148;ENST00000410042;ENST00000415142;ENST00000436234;ENST00000409145;ENST00000434566;ENST00000651691;ENST00000409684;ENST00000393471;ENST00000393473;ENST00000449211;ENST00000302513	0.845871	-0.24149	0.0243614	0.116275	down	no
MSTRG.203690	OR2A25	ENST00000408898;ENST00000641663;ENST00000641441	0.265247	-1.91459	0.0243723	0.116275	down	no
MSTRG.153088	NKX3-2	ENST00000382438	0.839797	-0.251888	0.0243746	0.116275	down	no
MSTRG.40181	GPR26	ENST00000284674	0.488361	-1.03398	0.0244956	0.116275	down	no
MSTRG.207188	UBXN8	ENST00000522968;ENST00000620074;ENST00000341403;ENST00000265616	0.75098	-0.413154	0.0245057	0.116275	down	no
MSTRG.138901	CCDC174	ENST00000383794;ENST00000611584;ENST00000303688	0.927394	-0.108745	0.0245268	0.116275	down	no
MSTRG.218647	FAM166B	ENST00000619051;ENST00000399742	2.31258	1.20951	0.0245539	0.116275	up	no
MSTRG.94713	C17orf64	ENST00000474834;ENST00000269127;ENST00000461535	0.286228	-1.80476	0.024632	0.116275	down	no
MSTRG.18387	NEGR1	ENST00000357731;ENST00000306821	0.632446	-0.660987	0.0246323	0.116275	down	no
MSTRG.27194	CACNA1S	ENST00000362061	0.00923225	-6.7591	0.0246563	0.116275	down	no
MSTRG.146608	C3orf56	ENST00000624688	0.00268534	-8.54068	0.0246563	0.116275	down	no
MSTRG.158537	DMP1	ENST00000282479;ENST00000339673	2.97404	1.57242	0.0246679	0.116275	up	no
MSTRG.129168	TGM2	ENST00000361475	0.581937	-0.781065	0.024811	0.116275	down	no
MSTRG.17720	USP1	ENST00000339950;ENST00000452143;ENST00000371146;ENST00000442679	0.660173	-0.599083	0.0248331	0.116275	down	no
MSTRG.203714	CTAGE6	ENST00000470691	0.847329	-0.239006	0.0248341	0.116275	down	no
MSTRG.182500	FKBP5	ENST00000536438;ENST00000542713;ENST00000357266	2.82684	1.49919	0.0248538	0.116275	up	no
MSTRG.104267	SUGP2	ENST00000452918;ENST00000600377;ENST00000601879;ENST00000337018	1.58694	0.666252	0.024864	0.116275	up	no
MSTRG.88697	GCSH;CMC2;AC092718;C16orf46	ENST00000315467;ENST00000630396;ENST00000638948;ENST00000486645;ENST00000564536;ENST00000561801;ENST00000640345;ENST00000562713;ENST00000299578;ENST00000219400;ENST00000565914;ENST00000569885;ENST00000564249;ENST00000640150;ENST00000565108;ENST00000639169;ENST00000570195;ENST00000378611;ENST00000565925;ENST00000639689;ENST00000565253	0.890051	-0.16804	0.02489	0.116275	down	no
MSTRG.51394	GLB1L2	ENST00000339772;ENST00000535456	0.653469	-0.613808	0.0248908	0.116275	down	no
MSTRG.127950	CRNKL1	ENST00000377340;ENST00000536226	0.762203	-0.391752	0.0249256	0.116275	down	no
MSTRG.69381	ACIN1	ENST00000357481;ENST00000555053;ENST00000555566;ENST00000457657;ENST00000262710;ENST00000557515;ENST00000397341;ENST00000338631;ENST00000605057	1.58262	0.662312	0.0249476	0.116275	up	no
MSTRG.23640	HCN3	ENST00000368358	1.70144	0.766752	0.0249768	0.116275	up	no
MSTRG.74751	EML5	ENST00000554922;ENST00000555823	0.572892	-0.803664	0.0249806	0.116275	down	no
MSTRG.174891	PRDM6	ENST00000407847	1.90184	0.9274	0.0251121	0.116275	up	no
MSTRG.75950	EIF5	ENST00000216554;ENST00000560763;ENST00000558506;ENST00000558316;ENST00000560338;ENST00000561325;ENST00000559532;ENST00000392715	0.735757	-0.442698	0.0251591	0.116275	down	no
MSTRG.82715	METRN	ENST00000219542;ENST00000568223;ENST00000568415	0.66746	-0.583247	0.0252127	0.116275	down	no
MSTRG.137606	DENND6B	ENST00000413817;ENST00000433760	1.66122	0.732244	0.0252482	0.116275	up	no
MSTRG.53277	CMAS	ENST00000229329;ENST00000538498	0.747292	-0.420255	0.0252658	0.116275	down	no
MSTRG.105934	WDR87	ENST00000447313	0.086852	-3.5253	0.0253408	0.116275	down	no
MSTRG.34906	A1CF	ENST00000395489;ENST00000373997	0.538348	-0.893388	0.0254428	0.116275	down	no
MSTRG.207474	TTI2	ENST00000613904;ENST00000360742;ENST00000523305;ENST00000431156;ENST00000520636	0.761144	-0.393758	0.0254734	0.116275	down	no
MSTRG.46456	KRTAP5-11	ENST00000398530	0.00241383	-8.69446	0.0255033	0.116275	down	no
MSTRG.89434	CDK10	ENST00000505473;ENST00000353379;ENST00000564192;ENST00000617879;ENST00000625631;ENST00000331006	1.62659	0.701854	0.0255038	0.116275	up	no
MSTRG.193046	PSMG3	ENST00000288607;ENST00000252329;ENST00000404674	0.865503	-0.20839	0.0255188	0.116275	down	no
MSTRG.31546	AKR1C2	ENST00000380753;ENST00000421196;ENST00000455190	0.787415	-0.344804	0.0255223	0.116275	down	no
MSTRG.204600	INSIG1	ENST00000340368;ENST00000425172;ENST00000476756;ENST00000344756;ENST00000342407	0.649332	-0.622971	0.0255422	0.116275	down	no
MSTRG.117912	POTEE	ENST00000356920	0.26799	-1.89975	0.025565	0.116275	down	no
MSTRG.80569	SCAMP5	ENST00000562212;ENST00000361900;ENST00000567920;ENST00000562327;ENST00000568018;ENST00000564779;ENST00000425597;ENST00000568081;ENST00000568119	0.715256	-0.483469	0.0255736	0.116275	down	no
MSTRG.136550	CSNK1E;TPTEP2-CSNK1E	ENST00000403904;ENST00000400206;ENST00000612795;ENST00000451964;ENST00000430335;ENST00000431632;ENST00000413574;ENST00000405675;ENST00000366216;ENST00000396832;ENST00000359867	1.53108	0.61455	0.025574	0.116275	up	no
MSTRG.46629	RAB6A	ENST00000336083;ENST00000541973;ENST00000541588;ENST00000540771;ENST00000310653;ENST00000536566	0.902288	-0.14834	0.025581	0.116275	down	no
MSTRG.84905	IL21R	ENST00000337929;ENST00000564089;ENST00000395754	2.18016	1.12443	0.0255841	0.116275	up	no
MSTRG.27485	NFASC	ENST00000539706;ENST00000360049;ENST00000401399;ENST00000339876;ENST00000403080;ENST00000447819;ENST00000425360;ENST00000505079	1.83602	0.876581	0.0255847	0.116275	up	no
MSTRG.123342	CTLA4	ENST00000648405	0.0651643	-3.93977	0.0256762	0.116275	down	no
MSTRG.115364	CIAO1	ENST00000488633	0.99612	-0.00560853	0.0256762	0.116275	down	no
MSTRG.79684	DAPK2	ENST00000612884;ENST00000261891;ENST00000559306;ENST00000457488	1.88238	0.912556	0.0257083	0.116275	up	no
MSTRG.79130	RAB27A;PIGBOS1	ENST00000396307;ENST00000564609;ENST00000567948;ENST00000336787;ENST00000565972;ENST00000566877;ENST00000436697;ENST00000569493;ENST00000567380	0.896366	-0.157841	0.02571	0.116275	down	no
MSTRG.34432	ZNF32	ENST00000395797;ENST00000374433	0.626113	-0.675506	0.0257493	0.116275	down	no
MSTRG.181786	GPX6	ENST00000612264	0.00320107	-8.28723	0.0258107	0.116275	down	no
MSTRG.91104	MIEF2	ENST00000579341;ENST00000323019;ENST00000578621;ENST00000578174;ENST00000395704;ENST00000395703;ENST00000395706	0.878433	-0.186996	0.0258211	0.116275	down	no
MSTRG.121259	PDE11A	ENST00000286063;ENST00000409504;ENST00000389683	0.740818	-0.432808	0.0258831	0.116275	down	no
MSTRG.209641	CYP7B1	ENST00000310193	0.623684	-0.681113	0.0258901	0.116275	down	no
MSTRG.15136	ZNF362	ENST00000539719;ENST00000483388;ENST00000373428	1.54465	0.627279	0.0259045	0.116275	up	no
MSTRG.57727	OSBPL8	ENST00000548341;ENST00000393249;ENST00000547540;ENST00000549570;ENST00000547544;ENST00000393250;ENST00000261183;ENST00000553139;ENST00000611266;ENST00000546946;ENST00000549646;ENST00000551927	0.760056	-0.395822	0.0259308	0.116275	down	no
MSTRG.124836	PAX3	ENST00000409828	0.053052	-4.23645	0.0259473	0.116275	down	no
MSTRG.146237	SLC15A2	ENST00000489711;ENST00000469013	1.76313	0.818137	0.0260169	0.116275	up	no
MSTRG.163988	RXFP1	ENST00000423548	0.0265632	-5.23443	0.0261031	0.116275	down	no
MSTRG.190903	AIG1	ENST00000494282;ENST00000357847;ENST00000629020;ENST00000646199;ENST00000458219;ENST00000367601;ENST00000367596;ENST00000447498;ENST00000275235	0.753963	-0.407435	0.0261534	0.116275	down	no
MSTRG.91139	FBXW10	ENST00000308799;ENST00000395665	0.529666	-0.916847	0.0261565	0.116275	down	no
MSTRG.30198	EDARADD	ENST00000637660;ENST00000359362;ENST00000334232	0.84239	-0.24744	0.0261718	0.116275	down	no
MSTRG.193999	TMEM106B	ENST00000444443;ENST00000396668;ENST00000396667	0.633296	-0.659047	0.0262074	0.116275	down	no
MSTRG.73696	TMED10	ENST00000303575	0.62525	-0.677495	0.026231	0.116275	down	no
MSTRG.97495	LDLRAD4	ENST00000586222;ENST00000592991;ENST00000587905;ENST00000585931;ENST00000359446;ENST00000593236;ENST00000586765;ENST00000587757;ENST00000399848	1.55181	0.63395	0.0262946	0.116275	up	no
MSTRG.116622	SLC35F5	ENST00000447673;ENST00000245680;ENST00000409342	0.813373	-0.298011	0.0263039	0.116275	down	no
MSTRG.214095	MAL2	ENST00000531508;ENST00000522112;ENST00000614891	0.371488	-1.42861	0.0263254	0.116275	down	no
MSTRG.224032	ZBTB43	ENST00000450858;ENST00000449886;ENST00000373457;ENST00000373464	0.947304	-0.0780999	0.0263336	0.116275	down	no
MSTRG.44438	TP53I11	ENST00000531928;ENST00000533940;ENST00000528473;ENST00000533443;ENST00000530035;ENST00000525683;ENST00000616990;ENST00000525680;ENST00000395648;ENST00000308212;ENST00000527685;ENST00000528290;ENST00000627720	3.10395	1.63411	0.0263369	0.116275	up	no
MSTRG.114821	RMND5A	ENST00000283632	0.845278	-0.242503	0.0263425	0.116275	down	no
MSTRG.204294	TMEM176A	ENST00000475536;ENST00000484928;ENST00000461345;ENST00000004103;ENST00000468689	0.443995	-1.17138	0.0263605	0.116275	down	no
MSTRG.91717	SLC13A2	ENST00000444914	0.00503187	-7.63469	0.0263738	0.116275	down	no
MSTRG.131896	HSPA13	ENST00000285667	0.461521	-1.11553	0.0264129	0.116275	down	no
MSTRG.68747	DCUN1D2	ENST00000465938;ENST00000478244;ENST00000332592;ENST00000496873	1.43419	0.520235	0.0264455	0.116275	up	no
MSTRG.106537	KCNN4	ENST00000600909;ENST00000648319	2.01667	1.01197	0.0264605	0.116275	up	no
MSTRG.93157	SOST	ENST00000301691	5.52866	2.46693	0.026462	0.116275	up	no
MSTRG.30098	TOMM20	ENST00000366607	0.524392	-0.931282	0.0264931	0.116275	down	no
MSTRG.60649	HRK	ENST00000257572	0.210391	-2.24885	0.0265032	0.116275	down	no
MSTRG.147455	NCK1;IL20RB	ENST00000467911;ENST00000491539;ENST00000481752;ENST00000288986;ENST00000469404;ENST00000329582;ENST00000476286;ENST00000496489	0.852666	-0.229947	0.0265294	0.116275	down	no
MSTRG.39817	PRDX3	ENST00000298510	0.646307	-0.629708	0.0265316	0.116275	down	no
MSTRG.22658	NBPF26;NOTCH2NLR	ENST00000651062;ENST00000619748;ENST00000617913;ENST00000620612;ENST00000624419;ENST00000615145;ENST00000611287;ENST00000609741;ENST00000652444	1.57325	0.653751	0.0265841	0.116275	up	no
MSTRG.177131	SLC26A2	ENST00000286298;ENST00000433184;ENST00000503336	0.638228	-0.647856	0.0266165	0.116275	down	no
MSTRG.151764	PCYT1A;TCTEX1D2;TM4SF19	ENST00000419333;ENST00000411591;ENST00000412869;ENST00000292823;ENST00000325318;ENST00000433733;ENST00000431016;ENST00000273695;ENST00000446879;ENST00000430755;ENST00000440822;ENST00000441879;ENST00000454715	0.934378	-0.097922	0.0266254	0.116275	down	no
MSTRG.197080	COBL	ENST00000445054;ENST00000632460;ENST00000648294;ENST00000395542;ENST00000431948;ENST00000395540;ENST00000265136;ENST00000449281;ENST00000441453	0.852078	-0.230943	0.0266564	0.116275	down	no
MSTRG.133010	CCT8	ENST00000286788;ENST00000626972;ENST00000432178;ENST00000540844	0.602461	-0.73106	0.0267106	0.116275	down	no
MSTRG.32560	HACD1	ENST00000361271;ENST00000466335;ENST00000326961	0.691299	-0.532618	0.0268041	0.116275	down	no
MSTRG.150796	DVL3	ENST00000313143;ENST00000431765	1.63137	0.706083	0.0268099	0.116275	up	no
MSTRG.132983	RWDD2B	ENST00000493196	0.732643	-0.448819	0.0268303	0.116275	down	no
MSTRG.193166	GNA12	ENST00000407653;ENST00000275364;ENST00000407904	0.923444	-0.114904	0.0268432	0.116275	down	no
MSTRG.107251	KCNA7	ENST00000221444	4.35988	2.12429	0.0268515	0.116275	up	no
MSTRG.67801	ZIC2	ENST00000376335	0.156098	-2.67947	0.0268551	0.116275	down	no
MSTRG.52033	AICDA	ENST00000229335	0.00423263	-7.88423	0.0268879	0.116275	down	no
MSTRG.113833	NOTO	ENST00000398468	0.18197	-2.45823	0.0269205	0.116275	down	no
MSTRG.45526	BSCL2;LRRN4CL;HNRNPUL2	ENST00000405837;ENST00000421906;ENST00000403550;ENST00000360796;ENST00000448568;ENST00000528874;ENST00000407022;ENST00000530009;ENST00000449636;ENST00000317449;ENST00000278893;ENST00000531524;ENST00000301785	0.925939	-0.111012	0.02698	0.116275	down	no
ENSG00000283740	TAF11L11	ENST00000510838	0.00200421	-8.96275	0.0270584	0.116275	down	no
MSTRG.44915	OR8K3	ENST00000623845	0.00405049	-7.94769	0.0270584	0.116275	down	no
ENSG00000151379	MSGN1	ENST00000281047	0.00219491	-8.83162	0.0270584	0.116275	down	no
MSTRG.78871	TMOD3	ENST00000308580;ENST00000558455	0.837431	-0.255958	0.0270625	0.116275	down	no
MSTRG.92626	SOCS7	ENST00000665913;ENST00000612932;ENST00000617765;ENST00000613678	0.944751	-0.0819941	0.0270656	0.116275	down	no
MSTRG.120158	PSMD14	ENST00000409682;ENST00000437630	0.799599	-0.322651	0.0270906	0.116275	down	no
MSTRG.123060	SGO2	ENST00000357799;ENST00000418045;ENST00000409203	0.778982	-0.360338	0.0270993	0.116275	down	no
MSTRG.152107	PDE6B	ENST00000496514;ENST00000255622;ENST00000461490;ENST00000471824;ENST00000488061;ENST00000465426	0.739647	-0.43509	0.0271876	0.116275	down	no
MSTRG.15911	RIMKLA	ENST00000431473;ENST00000410070	0.701432	-0.511626	0.0272428	0.116275	down	no
MSTRG.60807	WSB2	ENST00000441406;ENST00000315436;ENST00000535496;ENST00000537945;ENST00000544233	0.660873	-0.597555	0.0272436	0.116275	down	no
MSTRG.69127	OR4E2	ENST00000641524;ENST00000408935	0.00452576	-7.78762	0.0272752	0.116275	down	no
MSTRG.51911	SPSB2	ENST00000524270;ENST00000519357;ENST00000523102	0.534164	-0.904645	0.0273794	0.116275	down	no
ENSG00000197887	OR1S2	ENST00000302592;ENST00000641683	0.00161629	-9.2731	0.0273881	0.116275	down	no
MSTRG.85219	SEPHS2	ENST00000478753	0.650272	-0.620885	0.0273939	0.116275	down	no
MSTRG.176436	TAF7	ENST00000313368	0.705698	-0.502878	0.027399	0.116275	down	no
MSTRG.103965	KLF2	ENST00000248071;ENST00000592003	1.81022	0.856161	0.0274069	0.116275	up	no
MSTRG.49290	CUL5	ENST00000393094;ENST00000532782	0.952385	-0.0703827	0.0274112	0.116275	down	no
MSTRG.121380	TTC30B	ENST00000408939	0.78415	-0.350799	0.0274169	0.116275	down	no
MSTRG.96376	NARF	ENST00000577432;ENST00000412079;ENST00000457415;ENST00000309794;ENST00000390006;ENST00000584411;ENST00000577410;ENST00000345415;ENST00000579198;ENST00000580296	1.62245	0.698177	0.0274206	0.116275	up	no
MSTRG.179473	RNF130	ENST00000261947;ENST00000521389;ENST00000522208	0.953202	-0.0691466	0.027424	0.116275	down	no
MSTRG.23467	NUP210L	ENST00000368559;ENST00000368553	0.719407	-0.475121	0.0274512	0.116275	down	no
MSTRG.94879	TACO1	ENST00000258975	0.819085	-0.287915	0.0274842	0.116275	down	no
MSTRG.172752	POLR3G	ENST00000651687;ENST00000504930;ENST00000514483;ENST00000505345;ENST00000512239	0.751541	-0.412077	0.0275432	0.116275	down	no
MSTRG.96669	SMCHD1	ENST00000583800;ENST00000320876	0.956772	-0.0637532	0.0276043	0.116275	down	no
MSTRG.208549	SNTG1	ENST00000642377	0.0290077	-5.10742	0.0276562	0.116275	down	no
MSTRG.102125	ATP5F1D	ENST00000215375;ENST00000395633	0.761242	-0.393573	0.0276758	0.116275	down	no
MSTRG.6511	ITM2A	ENST00000373298;ENST00000434584	0.455047	-1.13591	0.0277027	0.116275	down	no
MSTRG.31107	OR2G2	ENST00000320065	0.0016204	-9.26943	0.0277206	0.116275	down	no
MSTRG.155571	COMMD8	ENST00000381571	0.476237	-1.07025	0.0277594	0.116275	down	no
MSTRG.35935	LRRTM3	ENST00000361320	0.405843	-1.301	0.0278175	0.116275	down	no
MSTRG.175756	C5orf15	ENST00000231512	0.555428	-0.848329	0.0278316	0.116275	down	no
MSTRG.102173	DAZAP1	ENST00000336761;ENST00000592522;ENST00000233078;ENST00000587079	1.62506	0.700491	0.0278346	0.116275	up	no
MSTRG.141395	BSN	ENST00000296452	1.90813	0.932163	0.0278422	0.116275	up	no
MSTRG.101950	HSBP1L1	ENST00000451882	0.860222	-0.217219	0.0278487	0.116275	down	no
MSTRG.26664	GLRX2	ENST00000367439;ENST00000367440	0.707382	-0.499439	0.0278607	0.116275	down	no
MSTRG.170063	IL6ST	ENST00000381298;ENST00000522633;ENST00000336909;ENST00000502326;ENST00000381294;ENST00000381287;ENST00000396816	0.666182	-0.586011	0.0278629	0.116275	down	no
MSTRG.152636	CRMP1	ENST00000324989;ENST00000397890;ENST00000512574	1.90398	0.929022	0.0278828	0.116275	up	no
MSTRG.70255	CFL2	ENST00000298159;ENST00000672163;ENST00000673315;ENST00000672517;ENST00000555765;ENST00000341223;ENST00000556161	0.607418	-0.719237	0.0278968	0.116275	down	no
MSTRG.141766	CACNA1D	ENST00000638120;ENST00000481478;ENST00000288139;ENST00000350061;ENST00000636938;ENST00000637424;ENST00000636627;ENST00000637714;ENST00000481085	1.79965	0.847712	0.0279348	0.116275	up	no
MSTRG.208187	FNTA;HOOK3	ENST00000529687;ENST00000302279;ENST00000307602;ENST00000533336;ENST00000533539	0.90322	-0.146851	0.0280009	0.116275	down	no
MSTRG.124099	IKZF2	ENST00000442445;ENST00000452786;ENST00000434687;ENST00000457361;ENST00000433134;ENST00000374319;ENST00000451136;ENST00000342002	0.58521	-0.772973	0.028007	0.116275	down	no
MSTRG.34812	SLC18A3	ENST00000374115	0.00404037	-7.9513	0.0280251	0.116275	down	no
MSTRG.66385	CLN5;AC001226	ENST00000616833;ENST00000638101;ENST00000485938;ENST00000377453;ENST00000638147;ENST00000635838;ENST00000637397;ENST00000637537;ENST00000636183;ENST00000636780;ENST00000636767	0.895464	-0.159292	0.028128	0.116275	down	no
MSTRG.8030	BEX5	ENST00000543160;ENST00000333643	0.497142	-1.00827	0.0281804	0.116275	down	no
MSTRG.126186	AGXT	ENST00000307503	0.00695487	-7.16776	0.0281895	0.116275	down	no
MSTRG.20270	ARHGAP29	ENST00000260526;ENST00000370217	0.701725	-0.511022	0.0282407	0.116275	down	no
MSTRG.112759	FANCL	ENST00000403676;ENST00000481670;ENST00000417361;ENST00000427708;ENST00000403295;ENST00000449070;ENST00000402135;ENST00000446381;ENST00000233741	0.781312	-0.35603	0.0282441	0.116275	down	no
MSTRG.100684	KDSR	ENST00000645214;ENST00000591902;ENST00000326575	0.737116	-0.440036	0.0282604	0.116275	down	no
MSTRG.68670	SOX1	ENST00000330949	97.7075	6.6104	0.0282837	0.116275	up	no
MSTRG.102304	DOT1L	ENST00000586024;ENST00000398665	1.76382	0.818705	0.0283057	0.116275	up	no
MSTRG.76719	ATP10A	ENST00000555815;ENST00000356865;ENST00000673716;ENST00000673747;ENST00000673763;ENST00000619904;ENST00000555756	2.00233	1.00168	0.0283124	0.116275	up	no
MSTRG.183395	CYP39A1	ENST00000275016	0.506316	-0.98189	0.0283153	0.116275	down	no
MSTRG.176614	YIPF5	ENST00000274496;ENST00000522203;ENST00000448443;ENST00000519064	0.737507	-0.439271	0.0283445	0.116275	down	no
MSTRG.80022	C15orf61	ENST00000342683;ENST00000557807	0.732076	-0.449934	0.0283609	0.116275	down	no
MSTRG.148917	LEKR1	ENST00000356539;ENST00000477399;ENST00000498839;ENST00000491763;ENST00000483177;ENST00000640869	0.819383	-0.28739	0.0283962	0.116275	down	no
MSTRG.23350	S100A7A	ENST00000329256	0.00760645	-7.03856	0.0284103	0.116275	down	no
MSTRG.94735	TBX4	ENST00000240335;ENST00000644296;ENST00000642491	0.597572	-0.742816	0.0284213	0.116275	down	no
MSTRG.201519	CAV2	ENST00000222693;ENST00000343213;ENST00000393480	0.63578	-0.6534	0.0284293	0.116275	down	no
MSTRG.12503	PLCH2	ENST00000609981;ENST00000449969;ENST00000378486	2.52036	1.33363	0.0285164	0.116275	up	no
MSTRG.107240	CGB1;CGB3	ENST00000601167;ENST00000357383;ENST00000301407	0.285382	-1.80903	0.0285318	0.116275	down	no
MSTRG.151838	PIGX;NRROS	ENST00000392391;ENST00000296333;ENST00000426755;ENST00000421265;ENST00000451319;ENST00000328557	0.816812	-0.291923	0.0285926	0.116275	down	no
MSTRG.34338	RASGEF1A	ENST00000395810;ENST00000395809;ENST00000374459	0.810682	-0.302793	0.0286469	0.116275	down	no
MSTRG.12047	FUNDC2	ENST00000369498	0.831811	-0.265672	0.0286537	0.116275	down	no
MSTRG.78817	LYSMD2	ENST00000267838;ENST00000560491	0.499168	-1.0024	0.0286586	0.116275	down	no
MSTRG.135646	HSCB	ENST00000216027;ENST00000398941	0.894465	-0.160903	0.0286632	0.116275	down	no
MSTRG.135063	ZNF280B	ENST00000626650	0.374712	-1.41615	0.028674	0.116275	down	no
MSTRG.76010	BAG5	ENST00000299204;ENST00000337322;ENST00000445922;ENST00000557666	0.783375	-0.352225	0.0286757	0.116275	down	no
MSTRG.224905	PTGDS;LCNL1	ENST00000457950;ENST00000444903;ENST00000371625;ENST00000640716;ENST00000446677;ENST00000408973	3.75318	1.90811	0.0287885	0.116275	up	no
MSTRG.134963	PPIL2	ENST00000406385;ENST00000458567;ENST00000335025;ENST00000626352;ENST00000398831	1.58054	0.660421	0.0288384	0.116275	up	no
MSTRG.62011	PXMP2;PGAM5	ENST00000317479;ENST00000454379;ENST00000543589;ENST00000317555;ENST00000543955;ENST00000498926;ENST00000454808;ENST00000428960	0.93574	-0.0958207	0.0288386	0.116275	down	no
MSTRG.189422	TRDN	ENST00000662930;ENST00000628709;ENST00000334268;ENST00000542443	0.0930334	-3.42611	0.0288507	0.116275	down	no
MSTRG.89927	CAMTA2;SPAG7	ENST00000572543;ENST00000381311;ENST00000575142;ENST00000361571;ENST00000414043;ENST00000573366;ENST00000574606;ENST00000206020	1.53575	0.618944	0.028912	0.116275	up	no
MSTRG.2581	FAM47A	ENST00000346193	0.450612	-1.15004	0.028912	0.116275	down	no
MSTRG.212261	TSPYL5	ENST00000322128	0.753954	-0.407452	0.0289329	0.116275	down	no
MSTRG.16065	HYI	ENST00000583037;ENST00000486909;ENST00000372425;ENST00000372430;ENST00000372433;ENST00000372432;ENST00000487366;ENST00000470662;ENST00000372434	0.721336	-0.471257	0.0289702	0.116275	down	no
MSTRG.24860	ATP1B1	ENST00000367816;ENST00000367815;ENST00000494797	0.625729	-0.67639	0.0290224	0.116275	down	no
MSTRG.41161	CARS1	ENST00000529772;ENST00000380525;ENST00000397111;ENST00000278224	1.68581	0.753441	0.0290454	0.116275	up	no
MSTRG.3097	DYNLT3	ENST00000378578;ENST00000432389;ENST00000378581	0.650356	-0.620698	0.0290765	0.116275	down	no
MSTRG.19834	GBP4	ENST00000355754	0.661569	-0.596037	0.0291065	0.116275	down	no
MSTRG.191775	NOX3	ENST00000159060	0.00350292	-8.15723	0.0291293	0.116275	down	no
MSTRG.55804	OR9K2	ENST00000641374	0.00578109	-7.43444	0.0291293	0.116275	down	no
MSTRG.120007	TANC1	ENST00000263635	1.60689	0.684272	0.0291393	0.116275	up	no
MSTRG.49973	TMPRSS4	ENST00000534111;ENST00000616579	0.480122	-1.05853	0.0291428	0.116275	down	no
MSTRG.184955	COL9A1	ENST00000320755;ENST00000370496;ENST00000357250	3.2596	1.70469	0.0291714	0.116275	up	no
MSTRG.82439	SYNM	ENST00000336292;ENST00000560674;ENST00000594047	0.847409	-0.23887	0.0292283	0.116275	down	no
MSTRG.168443	PDZD2	ENST00000438447;ENST00000513910	1.78459	0.835592	0.0292654	0.116275	up	no
MSTRG.102027	CDC34	ENST00000606065;ENST00000215574;ENST00000586283	0.868477	-0.20344	0.0292778	0.116275	down	no
MSTRG.46219	MRGPRF	ENST00000309099;ENST00000441623;ENST00000320913	0.792701	-0.335151	0.0293049	0.116275	down	no
MSTRG.125772	DGKD	ENST00000442524;ENST00000447484;ENST00000409813;ENST00000264057	1.4996	0.584574	0.0293997	0.116275	up	no
MSTRG.102839	C3;GPR108	ENST00000245907;ENST00000597298;ENST00000264080;ENST00000594034;ENST00000602229;ENST00000430424;ENST00000600744;ENST00000598955;ENST00000596548;ENST00000594500	0.607705	-0.718557	0.0294217	0.116275	down	no
MSTRG.80568	RPP25	ENST00000322177	0.790758	-0.338692	0.0294316	0.116275	down	no
MSTRG.138587	SLC6A11	ENST00000254488;ENST00000454147	0.125164	-2.99811	0.0294403	0.116275	down	no
MSTRG.181834	OR2W1	ENST00000377175	0.00180847	-9.11101	0.0294601	0.116275	down	no
MSTRG.215675	DENND3	ENST00000520725;ENST00000518347;ENST00000523308;ENST00000424248;ENST00000517985;ENST00000518249;ENST00000520986;ENST00000523058;ENST00000519291;ENST00000262585;ENST00000518668;ENST00000519811	1.70196	0.767199	0.0294763	0.116275	up	no
MSTRG.7956	RPL36A;HNRNPH2;RPL36A-HNRNPH2	ENST00000553110;ENST00000316594;ENST00000409338;ENST00000614077;ENST00000471855;ENST00000392994;ENST00000427805	0.814006	-0.296888	0.0294817	0.116275	down	no
MSTRG.2084	ZFX	ENST00000379188;ENST00000428571;ENST00000304543;ENST00000379177;ENST00000419690	0.848484	-0.23704	0.0294855	0.116275	down	no
MSTRG.20695	SLC35A3;AC118553;MFSD14A	ENST00000533028;ENST00000639807;ENST00000639994;ENST00000427993;ENST00000638792;ENST00000370152;ENST00000640732;ENST00000370153;ENST00000640600;ENST00000639037;ENST00000638988;ENST00000638371;ENST00000639221;ENST00000640715;ENST00000638336;ENST00000465289	0.834549	-0.260931	0.0295601	0.116275	down	no
MSTRG.104515	ZNF85	ENST00000599885;ENST00000596476;ENST00000597314;ENST00000300540;ENST00000328178;ENST00000601284;ENST00000595854	1.97284	0.980276	0.0295776	0.116275	up	no
MSTRG.26950	LHX9	ENST00000367388;ENST00000367387;ENST00000561173	0.529943	-0.916091	0.0295854	0.116275	down	no
MSTRG.85216	DCTPP1	ENST00000319285;ENST00000568973;ENST00000568434;ENST00000565758	0.49733	-1.00772	0.0295947	0.116275	down	no
MSTRG.40976	POLR2L	ENST00000322028	3.21505	1.68484	0.0295951	0.116275	up	no
MSTRG.141276	NME6	ENST00000451657;ENST00000421967;ENST00000444069;ENST00000442597;ENST00000447724;ENST00000643011;ENST00000452211;ENST00000415644;ENST00000456495;ENST00000642710;ENST00000415053;ENST00000643457;ENST00000426689;ENST00000425930;ENST00000435684	0.970473	-0.0432402	0.0296371	0.116275	down	no
MSTRG.43846	RAG1	ENST00000299440	0.8265	-0.274913	0.0296976	0.116275	down	no
MSTRG.99824	CFAP53	ENST00000398545	0.789639	-0.340735	0.0297026	0.116275	down	no
MSTRG.49467	CRYAB	ENST00000527950;ENST00000651164;ENST00000616970;ENST00000533280;ENST00000533475;ENST00000527899;ENST00000531198;ENST00000528628;ENST00000526167;ENST00000525823;ENST00000533971;ENST00000650687;ENST00000526180	2.11972	1.08388	0.0297276	0.116275	up	no
MSTRG.212296	MTDH	ENST00000336273;ENST00000519934;ENST00000522313;ENST00000521933	0.779664	-0.359076	0.0297814	0.116275	down	no
MSTRG.6861	RPS6KA6	ENST00000262752;ENST00000620340	0.680669	-0.554975	0.029796	0.116275	down	no
MSTRG.164632	SPOCK3	ENST00000510741;ENST00000421836;ENST00000357545;ENST00000541354;ENST00000535728;ENST00000511531;ENST00000512648;ENST00000357154;ENST00000511269	0.303355	-1.72092	0.0298631	0.116275	down	no
MSTRG.49927	SIK3	ENST00000413553;ENST00000446921;ENST00000375300;ENST00000445177;ENST00000454905	1.51587	0.600144	0.0298908	0.116275	up	no
MSTRG.15705	MACF1	ENST00000671089;ENST00000446276;ENST00000602528;ENST00000564288;ENST00000602421;ENST00000442046;ENST00000530275;ENST00000494012;ENST00000672812;ENST00000361689;ENST00000360115;ENST00000524432;ENST00000372925;ENST00000372915;ENST00000567887;ENST00000484793	1.54236	0.625139	0.0299009	0.116275	up	no
MSTRG.71591	TMX1	ENST00000457354	0.567272	-0.817888	0.02992	0.116275	down	no
MSTRG.12580	ARHGEF16	ENST00000445297;ENST00000378378;ENST00000378371;ENST00000378373	0.546799	-0.870916	0.0299399	0.116275	down	no
MSTRG.3463	NDP	ENST00000642620;ENST00000647044	0.596383	-0.745688	0.0299523	0.116275	down	no
MSTRG.153133	RAB28	ENST00000330852;ENST00000510528;ENST00000511649;ENST00000288723;ENST00000630951;ENST00000338176	0.692389	-0.530344	0.0299878	0.116275	down	no
MSTRG.151659	ACAP2	ENST00000326793;ENST00000439666;ENST00000635383;ENST00000466876;ENST00000439758;ENST00000450200;ENST00000618471	0.733213	-0.447696	0.0299964	0.116275	down	no
MSTRG.167491	TAF11L9	ENST00000639969	0.00105536	-9.88804	0.0300243	0.116275	down	no
MSTRG.45477	SCGB2A2	ENST00000525380	0.00260145	-8.58647	0.0300262	0.116275	down	no
MSTRG.140039	CMTM6	ENST00000205636	0.589024	-0.763601	0.0300401	0.116275	down	no
MSTRG.62730	POLR1D	ENST00000636817;ENST00000489647;ENST00000399697;ENST00000621089;ENST00000302979;ENST00000627604;ENST00000637071;ENST00000399696;ENST00000637180	0.931773	-0.10195	0.0300456	0.116275	down	no
MSTRG.131363	SMIM11B	ENST00000623661;ENST00000624758;ENST00000622934;ENST00000612624;ENST00000624304;ENST00000619874	0.86229	-0.213754	0.0300556	0.116275	down	no
MSTRG.111779	MCFD2	ENST00000649435;ENST00000409105;ENST00000409800;ENST00000444761;ENST00000417180;ENST00000412438;ENST00000409147;ENST00000409973;ENST00000409218;ENST00000434262;ENST00000409913;ENST00000319466;ENST00000409207	0.67329	-0.5707	0.0300563	0.116275	down	no
MSTRG.151951	FYTTD1	ENST00000241502;ENST00000424384;ENST00000428738;ENST00000426031;ENST00000415708	0.680981	-0.554315	0.0300598	0.116275	down	no
MSTRG.63890	NUFIP1	ENST00000379161	0.730584	-0.452879	0.030062	0.116275	down	no
MSTRG.157765	NUP54	ENST00000514987;ENST00000264883;ENST00000514901	0.804754	-0.31338	0.0300642	0.116275	down	no
ENSG00000089199	CHGB	ENST00000378961;ENST00000455042	0.0911151	-3.45617	0.0301175	0.116275	down	no
MSTRG.141186	AC109583;PRSS50;PRSS45P	ENST00000460241;ENST00000315170;ENST00000442359;ENST00000620911	1.7497	0.807105	0.0301198	0.116275	up	no
MSTRG.155264	ATP8A1	ENST00000510289;ENST00000264449;ENST00000381668	0.709531	-0.495063	0.0301551	0.116275	down	no
MSTRG.44534	DGKZ	ENST00000318201;ENST00000524869;ENST00000456247;ENST00000528615;ENST00000454345;ENST00000527911;ENST00000343674;ENST00000525242;ENST00000532868;ENST00000421244	1.72224	0.784287	0.030194	0.116275	up	no
MSTRG.204879	WDR60	ENST00000407559;ENST00000397143	1.52429	0.60814	0.0302119	0.116275	up	no
MSTRG.113669	PCYOX1	ENST00000433351;ENST00000414812;ENST00000451279	0.719016	-0.475904	0.0302345	0.116275	down	no
MSTRG.127941	RIN2	ENST00000648440	1.67709	0.745959	0.0302478	0.116275	up	no
MSTRG.55115	KANSL2	ENST00000547087;ENST00000550870;ENST00000550931;ENST00000550347;ENST00000420613;ENST00000548304;ENST00000553086	0.895446	-0.159322	0.0302526	0.116275	down	no
MSTRG.144701	ZPLD1	ENST00000306176;ENST00000491959;ENST00000466937	0.623237	-0.682146	0.0302803	0.116275	down	no
MSTRG.131289	TPD52L2;DNAJC5	ENST00000369927;ENST00000358548;ENST00000352482;ENST00000348257;ENST00000360864;ENST00000346249;ENST00000615907;ENST00000217121	0.953767	-0.0682915	0.0303229	0.116275	down	no
MSTRG.221502	MFSD14B	ENST00000375344	0.838609	-0.25393	0.0303253	0.116275	down	no
MSTRG.208917	TMEM68	ENST00000521229;ENST00000434581;ENST00000334667;ENST00000520414;ENST00000519780;ENST00000617977;ENST00000523073;ENST00000523180;ENST00000617782;ENST00000522090;ENST00000522576;ENST00000523423	0.822914	-0.281187	0.0303304	0.116275	down	no
MSTRG.32036	ECHDC3	ENST00000420401;ENST00000422887;ENST00000379215	0.633153	-0.659374	0.0303574	0.116275	down	no
MSTRG.165898	TLR3	ENST00000296795;ENST00000513189	0.731254	-0.451555	0.0303575	0.116275	down	no
MSTRG.78355	SPATA5L1	ENST00000305560	0.835696	-0.25895	0.0303725	0.116275	down	no
MSTRG.36315	CHST3	ENST00000373115	1.8515	0.888697	0.0303848	0.116275	up	no
MSTRG.73507	RIOX1	ENST00000304061	0.853299	-0.228876	0.0304187	0.116275	down	no
MSTRG.182558	PNPLA1	ENST00000636260;ENST00000394571;ENST00000457797;ENST00000312917	0.322157	-1.63416	0.030439	0.116275	down	no
MSTRG.8220	PLP1	ENST00000612423;ENST00000619236;ENST00000621218	5.04223	2.33406	0.0304415	0.116275	up	no
MSTRG.59146	METAP2	ENST00000261220;ENST00000323666;ENST00000549808;ENST00000551840;ENST00000546753;ENST00000549502	0.602826	-0.730186	0.0304781	0.116275	down	no
MSTRG.25711	TOR1AIP2	ENST00000482587;ENST00000495650;ENST00000609928;ENST00000367612	0.898791	-0.153942	0.030488	0.116275	down	no
MSTRG.39828	GRK5	ENST00000392870	0.69751	-0.519713	0.0305152	0.116275	down	no
MSTRG.133346	IFNAR1	ENST00000270139;ENST00000652450;ENST00000652513	0.849737	-0.234912	0.0305235	0.116275	down	no
MSTRG.170674	TRIM23	ENST00000513794;ENST00000274327;ENST00000231524	0.776381	-0.365163	0.0305296	0.116275	down	no
MSTRG.199323	SLC25A40	ENST00000341119	0.665992	-0.586423	0.0305403	0.116275	down	no
MSTRG.133837	BACE2	ENST00000347667;ENST00000330333;ENST00000328735	0.875768	-0.191379	0.0305607	0.116275	down	no
MSTRG.188846	NT5DC1	ENST00000319550;ENST00000419791	0.74029	-0.433838	0.0306199	0.116275	down	no
MSTRG.85379	ARMC5	ENST00000408912;ENST00000564900;ENST00000457010;ENST00000563544;ENST00000268314	0.809592	-0.304733	0.0306203	0.116275	down	no
MSTRG.8502	PSMD10	ENST00000217958;ENST00000361815;ENST00000340200	0.602627	-0.730664	0.0306234	0.116275	down	no
MSTRG.15229	SMIM12	ENST00000521580;ENST00000446026;ENST00000423898;ENST00000456842;ENST00000417239	0.89916	-0.15335	0.0306523	0.116275	down	no
MSTRG.134141	KRTAP10-4;KRTAP10-10;KRTAP10-7	ENST00000400374;ENST00000380095;ENST00000609664	0.0106772	-6.54933	0.0306623	0.116275	down	no
MSTRG.91194	SLC47A1	ENST00000270570;ENST00000571335;ENST00000395585;ENST00000436810;ENST00000581558	0.626202	-0.675299	0.0307821	0.116275	down	no
MSTRG.9009	LRCH2	ENST00000317135	0.604673	-0.725774	0.0307847	0.116275	down	no
MSTRG.113637	GFPT1	ENST00000674507;ENST00000674438;ENST00000361060;ENST00000357308	0.890994	-0.166513	0.0307851	0.116275	down	no
MSTRG.36082	SLC25A16	ENST00000609923;ENST00000608053	0.91151	-0.133669	0.0308263	0.116275	down	no
MSTRG.57613	KRR1	ENST00000229214	0.721002	-0.471924	0.030847	0.116275	down	no
MSTRG.133198	HUNK	ENST00000439107;ENST00000270112;ENST00000430354	2.44604	1.29045	0.0308649	0.116275	up	no
MSTRG.65960	MZT1	ENST00000377818	0.468728	-1.09318	0.0309093	0.116275	down	no
MSTRG.46943	NDUFC2;KCTD14;NDUFC2-KCTD14	ENST00000281031;ENST00000533144;ENST00000353172;ENST00000612612;ENST00000534029;ENST00000528164	0.806361	-0.310502	0.0309292	0.116275	down	no
MSTRG.30700	KMO	ENST00000366558;ENST00000366559	0.399623	-1.32329	0.0309767	0.116275	down	no
MSTRG.126225	D2HGDH	ENST00000403782;ENST00000437164;ENST00000432449;ENST00000321264;ENST00000417686	1.67886	0.747483	0.0310171	0.116275	up	no
MSTRG.140726	ZNF621	ENST00000403205;ENST00000339296;ENST00000431278;ENST00000453351;ENST00000310898	1.40534	0.490921	0.0310544	0.116275	up	no
MSTRG.48771	DCUN1D5	ENST00000260247;ENST00000531543	0.7624	-0.391381	0.0310925	0.116275	down	no
MSTRG.205025	ARHGEF10;CLN8	ENST00000518288;ENST00000635751;ENST00000637594;ENST00000520359;ENST00000637156;ENST00000522435;ENST00000349830;ENST00000637083;ENST00000524258;ENST00000398560;ENST00000636934;ENST00000331222;ENST00000520991	1.59962	0.677726	0.0311151	0.116275	up	no
MSTRG.191642	FBXO5	ENST00000367241;ENST00000229758	0.832589	-0.264323	0.0311313	0.116275	down	no
MSTRG.124550	PRKAG3	ENST00000439262;ENST00000529249	2.14647	1.10197	0.0311489	0.116275	up	no
MSTRG.41070	PRR33	ENST00000640310	2.00982	1.00706	0.0311851	0.116275	up	no
MSTRG.102972	FBN3	ENST00000601739	0.17601	-2.50627	0.0311852	0.116275	down	no
MSTRG.37340	LDB3	ENST00000429277;ENST00000361373;ENST00000477489;ENST00000623056	1.86431	0.898645	0.0312105	0.116275	up	no
MSTRG.35321	TFAM	ENST00000395377;ENST00000373895;ENST00000487519	0.635217	-0.654679	0.0312409	0.116275	down	no
MSTRG.148464	SELENOT	ENST00000615547;ENST00000471696;ENST00000485923;ENST00000477889;ENST00000480740	0.592751	-0.754502	0.031259	0.116275	down	no
MSTRG.224358	TOR1A	ENST00000651202;ENST00000351698	0.76528	-0.385941	0.0312681	0.116275	down	no
MSTRG.104680	ZNF208	ENST00000397126;ENST00000597040;ENST00000599916;ENST00000601773;ENST00000599723;ENST00000601993	3.48496	1.80114	0.0312695	0.116275	up	no
MSTRG.214764	LRATD2	ENST00000652209;ENST00000304916	0.804654	-0.31356	0.03127	0.116275	down	no
MSTRG.87750	CMTR2	ENST00000434935;ENST00000568910;ENST00000564183;ENST00000565850;ENST00000338099;ENST00000567610	0.765467	-0.385588	0.0313185	0.116275	down	no
MSTRG.3738	ZNF157	ENST00000377073	0.731887	-0.450306	0.0313632	0.116275	down	no
MSTRG.160558	TIFA	ENST00000361717;ENST00000500655	0.697756	-0.519206	0.0313887	0.116275	down	no
MSTRG.34368	HNRNPF	ENST00000443950;ENST00000337970;ENST00000356053;ENST00000357065;ENST00000544000;ENST00000477108	1.03711	0.0525641	0.0314301	0.116275	up	no
MSTRG.29475	SNAP47	ENST00000617596;ENST00000478768;ENST00000366759;ENST00000606873;ENST00000418653;ENST00000426344	0.825429	-0.276785	0.0314431	0.116275	down	no
MSTRG.24046	ATP1A4	ENST00000368081	0.525167	-0.929151	0.031455	0.116275	down	no
MSTRG.92409	LYZL6	ENST00000615905	0.00211594	-8.88448	0.0314805	0.116275	down	no
MSTRG.6834	CYLC1	ENST00000329312	0.00395781	-7.98108	0.0314805	0.116275	down	no
MSTRG.71795	STYX	ENST00000442123;ENST00000354586	0.748452	-0.418018	0.0315419	0.116275	down	no
MSTRG.190421	MAP3K5	ENST00000359015	0.713724	-0.486561	0.0315512	0.116275	down	no
MSTRG.29532	RNF187	ENST00000305943	0.878557	-0.186793	0.0315643	0.116275	down	no
MSTRG.115333	ANKRD36C	ENST00000612359;ENST00000295246;ENST00000456556;ENST00000619511	1.7298	0.790609	0.0316561	0.116275	up	no
MSTRG.155641	CNGA1	ENST00000514170;ENST00000513178;ENST00000402813;ENST00000420489;ENST00000514520	0.503219	-0.990741	0.0316818	0.116275	down	no
MSTRG.43442	PRRG4	ENST00000257836	0.609126	-0.715188	0.0318034	0.116275	down	no
MSTRG.11249	SLITRK4	ENST00000338017;ENST00000596188;ENST00000356928	0.490658	-1.02721	0.0318135	0.116275	down	no
MSTRG.57349	TBC1D15	ENST00000319106;ENST00000485960;ENST00000550746;ENST00000482439	0.922318	-0.116664	0.0318275	0.116275	down	no
MSTRG.79955	ZWILCH	ENST00000446801;ENST00000613446;ENST00000307897;ENST00000564179;ENST00000535141;ENST00000569489	0.675609	-0.56574	0.0318925	0.116275	down	no
MSTRG.7399	PCDH11X	ENST00000373094	0.38063	-1.39354	0.0318958	0.116275	down	no
MSTRG.53683	FAR2	ENST00000182377;ENST00000551193;ENST00000551451;ENST00000536681;ENST00000547759	0.846801	-0.239904	0.0318968	0.116275	down	no
MSTRG.32974	OTUD1	ENST00000376495	0.808182	-0.307248	0.0319017	0.116275	down	no
MSTRG.141661	WDR82	ENST00000296490;ENST00000463624;ENST00000469000	0.827934	-0.272412	0.0319592	0.116275	down	no
MSTRG.90991	COPS3	ENST00000268717;ENST00000583160;ENST00000539941;ENST00000439936;ENST00000417352;ENST00000579716	0.946173	-0.0798247	0.0320183	0.116275	down	no
MSTRG.70097	ARHGAP5	ENST00000539826;ENST00000556611;ENST00000432921;ENST00000554090;ENST00000396582;ENST00000433497;ENST00000345122	0.688702	-0.538048	0.0320446	0.116275	down	no
MSTRG.116262	CCDC138	ENST00000608781;ENST00000456512;ENST00000412964;ENST00000295124	0.856427	-0.223598	0.0320475	0.116275	down	no
MSTRG.103081	ZNF699	ENST00000591998;ENST00000308650	0.876971	-0.189398	0.032051	0.116275	down	no
MSTRG.89612	ABR	ENST00000574266;ENST00000536794;ENST00000543210;ENST00000570525;ENST00000291107;ENST00000575934;ENST00000574544;ENST00000302538;ENST00000544583;ENST00000570441;ENST00000574437;ENST00000571945;ENST00000574139;ENST00000571797	1.45587	0.541882	0.0320673	0.116275	up	no
MSTRG.27556	MFSD4A	ENST00000536357;ENST00000367147;ENST00000616173	1.60642	0.683849	0.0320984	0.116275	up	no
MSTRG.50384	SORL1	ENST00000260197;ENST00000527934;ENST00000534286;ENST00000532694	0.665577	-0.587322	0.0321466	0.116275	down	no
MSTRG.83632	EMP2	ENST00000359543;ENST00000536829	0.919971	-0.120339	0.0321616	0.116275	down	no
MSTRG.168475	GOLPH3	ENST00000265070	0.920383	-0.119693	0.0321896	0.116275	down	no
MSTRG.107889	NLRP2	ENST00000397169;ENST00000448584;ENST00000543010;ENST00000588107	6.08585	2.60546	0.0321905	0.116275	up	no
MSTRG.106947	PNMA8B	ENST00000599531	0.666991	-0.584261	0.0321912	0.116275	down	no
MSTRG.200264	BUD31	ENST00000222969;ENST00000403633	0.898222	-0.154856	0.0321977	0.116275	down	no
MSTRG.46520	AP002495	ENST00000529844;ENST00000528511;ENST00000528184;ENST00000529513;ENST00000533047;ENST00000532852;ENST00000534704	1.76554	0.820114	0.0322691	0.116275	up	no
MSTRG.183712	TFAP2D	ENST00000008391	0.00421143	-7.89147	0.0323361	0.116275	down	no
MSTRG.36158	TSPAN15	ENST00000373290	2.68241	1.42353	0.032349	0.116275	up	no
MSTRG.213324	TMEM74	ENST00000297459	0.628053	-0.671041	0.0323547	0.116275	down	no
MSTRG.149779	MYNN	ENST00000349841;ENST00000356716;ENST00000544106	0.77437	-0.368904	0.0324042	0.116275	down	no
MSTRG.162498	RAB33B	ENST00000305626;ENST00000652268	0.75023	-0.414595	0.0324245	0.116275	down	no
MSTRG.97328	CEP76	ENST00000262127;ENST00000585751;ENST00000591034;ENST00000587666	0.872429	-0.19689	0.032463	0.116275	down	no
MSTRG.91052	SREBF1	ENST00000486311;ENST00000261646;ENST00000423161;ENST00000478616;ENST00000355815;ENST00000395757	0.86834	-0.203667	0.0324665	0.116275	down	no
MSTRG.84017	NOMO3	ENST00000399336;ENST00000263012;ENST00000570346	0.599006	-0.739357	0.0324736	0.116275	down	no
MSTRG.146939	COL6A5	ENST00000512836	0.15578	-2.68242	0.0325093	0.116275	down	no
MSTRG.25323	DARS2	ENST00000649067;ENST00000649689;ENST00000648458;ENST00000649106;ENST00000648807	0.823225	-0.280642	0.0325177	0.116275	down	no
MSTRG.97456	POTEC	ENST00000620346	0.0963154	-3.37609	0.0325447	0.116275	down	no
MSTRG.83177	DNAJA3	ENST00000431375;ENST00000355296;ENST00000262375	0.865141	-0.208993	0.0325923	0.116275	down	no
MSTRG.48523	CNTN5	ENST00000418526;ENST00000527185;ENST00000524871	0.414766	-1.26963	0.0326164	0.116275	down	no
MSTRG.49432	LAYN	ENST00000525126;ENST00000375615;ENST00000533265;ENST00000375614;ENST00000530962;ENST00000528924;ENST00000533999;ENST00000436913	0.74139	-0.431695	0.0326484	0.116275	down	no
MSTRG.171592	SCAMP1	ENST00000621999;ENST00000320280;ENST00000511551;ENST00000618166;ENST00000510030	0.632223	-0.661495	0.0326723	0.116275	down	no
MSTRG.124266	MREG;PECR	ENST00000263268;ENST00000265322;ENST00000424992;ENST00000420348;ENST00000439791	0.869168	-0.202293	0.0326934	0.116275	down	no
MSTRG.95390	ABCA9	ENST00000340001;ENST00000495634;ENST00000453985;ENST00000585714	0.660709	-0.597913	0.0326997	0.116275	down	no
MSTRG.14436	GPN2;GPATCH3	ENST00000374135;ENST00000374133;ENST00000450844;ENST00000361720;ENST00000445019	0.972935	-0.0395845	0.0327584	0.116275	down	no
MSTRG.75132	ASB2	ENST00000555019;ENST00000315988;ENST00000557613;ENST00000555507	6.2859	2.65212	0.0328172	0.116275	up	no
MSTRG.29691	GALNT2	ENST00000366672	0.663704	-0.591389	0.0328324	0.116275	down	no
MSTRG.51019	TMEM45B	ENST00000524567	2.30168	1.20269	0.0328431	0.116275	up	no
MSTRG.57995	OTOGL	ENST00000646859;ENST00000550182;ENST00000547103	0.675794	-0.565344	0.0328592	0.116275	down	no
MSTRG.59385	IKBIP	ENST00000299157;ENST00000342502;ENST00000393042	0.824716	-0.27803	0.032893	0.116275	down	no
MSTRG.1224	FANCB	ENST00000650831	0.679121	-0.55826	0.0329314	0.116275	down	no
MSTRG.62982	RXFP2	ENST00000298386	0.0463511	-4.43125	0.0329695	0.116275	down	no
MSTRG.73811	CIPC;TMEM63C	ENST00000361786;ENST00000298351;ENST00000557115;ENST00000554766;ENST00000555200;ENST00000554447;ENST00000556514;ENST00000555611;ENST00000555437;ENST00000554658	0.915628	-0.127166	0.0330105	0.116275	down	no
MSTRG.36944	TSPAN14	ENST00000372156;ENST00000429989;ENST00000372158;ENST00000616406;ENST00000372157	1.8864	0.915635	0.0330136	0.116275	up	no
MSTRG.130957	PPP1R3D	ENST00000370996	0.753512	-0.408298	0.0330586	0.116275	down	no
MSTRG.91145	PRPSAP2	ENST00000574451;ENST00000460724;ENST00000422237;ENST00000610773;ENST00000536323;ENST00000432893;ENST00000419284;ENST00000412418;ENST00000268835;ENST00000575228;ENST00000576355	0.9737	-0.0384511	0.0330689	0.116275	down	no
MSTRG.81286	HDGFL3	ENST00000568294;ENST00000299633	0.804557	-0.313734	0.0330939	0.116275	down	no
MSTRG.218039	IFNK	ENST00000276943	2.09876	1.06953	0.033101	0.116275	up	no
MSTRG.13234	FBXO6	ENST00000449067;ENST00000376753	0.876892	-0.189529	0.0331196	0.116275	down	no
MSTRG.87649	TERF2;PDF;AC026464;COG8;TMED6	ENST00000567296;ENST00000288022;ENST00000566051;ENST00000254942;ENST00000569542;ENST00000563634;ENST00000648169;ENST00000288025;ENST00000615447;ENST00000562595;ENST00000566257;ENST00000566750;ENST00000569584;ENST00000562081;ENST00000306875;ENST00000567841;ENST00000567493	1.00862	0.0123815	0.0331277	0.116275	up	no
MSTRG.157586	PARM1	ENST00000307428;ENST00000513238	0.537166	-0.896559	0.0331739	0.116275	down	no
MSTRG.163194	TMEM184C	ENST00000296582;ENST00000508208	0.831458	-0.266285	0.0332086	0.116275	down	no
MSTRG.118146	MCM6	ENST00000264156	0.838403	-0.254284	0.033225	0.116275	down	no
ENSG00000204880	KRTAP4-8	ENST00000333822	0.00227869	-8.77758	0.0332317	0.116275	down	no
MSTRG.62560	NUP58	ENST00000463407;ENST00000381718;ENST00000381736	0.907847	-0.139478	0.033262	0.116275	down	no
MSTRG.14212	RCAN3	ENST00000616511;ENST00000436717;ENST00000618490;ENST00000538532;ENST00000425530;ENST00000374395;ENST00000412742	0.750474	-0.414126	0.0332862	0.116275	down	no
MSTRG.139996	STT3B	ENST00000295770	0.727316	-0.459346	0.0333101	0.116275	down	no
MSTRG.10684	CT45A1	ENST00000594117;ENST00000594565	0.011667	-6.42142	0.0333203	0.116275	down	no
MSTRG.178993	C5orf47	ENST00000340147	0.181892	-2.45885	0.0333429	0.116275	down	no
MSTRG.126720	CENPB	ENST00000379751	0.832614	-0.26428	0.033346	0.116275	down	no
MSTRG.91057	DRC3	ENST00000579977;ENST00000479684;ENST00000584166;ENST00000313838;ENST00000582416;ENST00000399187;ENST00000581264	1.64128	0.714825	0.0333823	0.116275	up	no
MSTRG.81011	CTXND1	ENST00000560778	2.79186	1.48123	0.0333961	0.116275	up	no
MSTRG.195007	SNX10	ENST00000619420;ENST00000409838;ENST00000412416;ENST00000338523;ENST00000409367;ENST00000416246;ENST00000446848;ENST00000396376	0.419176	-1.25437	0.0334424	0.116275	down	no
MSTRG.199446	STEAP4	ENST00000301959;ENST00000380079;ENST00000414498	0.526012	-0.926834	0.0335923	0.116275	down	no
MSTRG.68825	UPF3A	ENST00000375299;ENST00000351487;ENST00000492270	1.43229	0.518325	0.0336046	0.116275	up	no
MSTRG.215822	GPIHBP1	ENST00000622500	5.75203	2.52407	0.0336106	0.116275	up	no
MSTRG.127736	SEC23B	ENST00000645851;ENST00000650089;ENST00000450074;ENST00000474619;ENST00000336714;ENST00000377465;ENST00000262544;ENST00000646240	0.757677	-0.400345	0.0336236	0.116275	down	no
MSTRG.38173	PI4K2A;HOGA1;AL355315	ENST00000370631;ENST00000370646;ENST00000370642;ENST00000370649;ENST00000370647	0.953971	-0.0679827	0.0336491	0.116275	down	no
MSTRG.23065	NBPF19;NOTCH2NLC;AC242842	ENST00000612881;ENST00000652191;ENST00000621744;ENST00000651566;ENST00000650865	1.66849	0.738541	0.0336497	0.116275	up	no
MSTRG.100078	C18orf54	ENST00000300091;ENST00000620105;ENST00000382911;ENST00000648616	0.825013	-0.277512	0.033702	0.116275	down	no
MSTRG.92903	KRT20	ENST00000167588	0.37213	-1.42612	0.033799	0.116275	down	no
MSTRG.46102	TMEM134	ENST00000308022;ENST00000393877	0.931314	-0.10266	0.0338137	0.116275	down	no
MSTRG.41443	OR56B1;TRIM22	ENST00000317121;ENST00000454828;ENST00000414641;ENST00000429063;ENST00000450670;ENST00000444844;ENST00000379965;ENST00000425490	2.43402	1.28334	0.0338265	0.116275	up	no
MSTRG.94961	GNA13	ENST00000439174;ENST00000541118	0.725593	-0.462768	0.0338446	0.116275	down	no
MSTRG.27635	SRGAP2	ENST00000572793;ENST00000604925;ENST00000624873;ENST00000579225;ENST00000419187;ENST00000573034;ENST00000604010;ENST00000605476;ENST00000605610	1.58124	0.661058	0.033929	0.116275	up	no
MSTRG.125236	SLC19A3	ENST00000644224;ENST00000456524;ENST00000419059;ENST00000258403;ENST00000646591;ENST00000409456	0.754009	-0.407346	0.0341082	0.116275	down	no
MSTRG.211850	RUNX1T1	ENST00000613302;ENST00000521054;ENST00000520724;ENST00000518954;ENST00000422361;ENST00000521553;ENST00000360348;ENST00000614812;ENST00000436581;ENST00000521375;ENST00000396218;ENST00000519061;ENST00000613886;ENST00000265814;ENST00000521733;ENST00000617740;ENST00000615601;ENST00000519847;ENST00000521319;ENST00000520974;ENST00000517919;ENST00000523629;ENST00000520428;ENST00000518992;ENST00000517792…	1.70692	0.771395	0.0341413	0.116275	up	no
MSTRG.84221	CLEC19A	ENST00000465414;ENST00000636231	0.313891	-1.67166	0.0341452	0.116275	down	no
MSTRG.88729	CMIP	ENST00000566462;ENST00000566513;ENST00000621537;ENST00000398040;ENST00000537098;ENST00000539778	1.75106	0.808231	0.0341505	0.116275	up	no
MSTRG.87633	UTP4	ENST00000566227;ENST00000314423;ENST00000567235;ENST00000567460;ENST00000562237;ENST00000563299;ENST00000563094	0.878068	-0.187595	0.0341559	0.116275	down	no
MSTRG.131296	UCKL1;ZNF512B	ENST00000369908;ENST00000430743;ENST00000369888;ENST00000358711;ENST00000354216	1.57637	0.656611	0.0341982	0.116275	up	no
MSTRG.72642	PRKCH	ENST00000556164;ENST00000553265;ENST00000332981;ENST00000556778;ENST00000557473;ENST00000557294;ENST00000553831;ENST00000555185;ENST00000555542;ENST00000553830;ENST00000557585;ENST00000640011	1.94264	0.958015	0.034244	0.116275	up	no
MSTRG.87451	CENPT	ENST00000440851;ENST00000562787;ENST00000566758;ENST00000626059	1.56109	0.642558	0.0342647	0.116275	up	no
MSTRG.90181	EFNB3	ENST00000226091	2.267	1.18078	0.0343075	0.116275	up	no
MSTRG.62352	TNFRSF19	ENST00000382258;ENST00000382263;ENST00000248484	2.33386	1.22272	0.0343342	0.116275	up	no
MSTRG.71205	C14orf28	ENST00000325192	0.762678	-0.390854	0.034352	0.116275	down	no
MSTRG.197189	GRB10	ENST00000428711;ENST00000357271;ENST00000643299;ENST00000398810;ENST00000439044;ENST00000398812;ENST00000402497;ENST00000406641;ENST00000402578;ENST00000401949;ENST00000407526;ENST00000335866;ENST00000645075;ENST00000403097	1.74005	0.799126	0.0343529	0.116275	up	no
MSTRG.210224	RDH10	ENST00000240285;ENST00000519380;ENST00000521928	0.806546	-0.310172	0.0343646	0.116275	down	no
MSTRG.26877	CFHR3;CFHR1;CFHR4;CFH	ENST00000367425;ENST00000320493;ENST00000471440;ENST00000367416;ENST00000630130;ENST00000617219;ENST00000367429	0.543126	-0.880642	0.0343711	0.116275	down	no
MSTRG.200039	DLX6	ENST00000555308;ENST00000518156	1.63911	0.712912	0.034397	0.116275	up	no
MSTRG.216727	LURAP1L	ENST00000319264	0.648231	-0.62542	0.0344113	0.116275	down	no
MSTRG.217939	CAAP1	ENST00000333916;ENST00000625311	0.821575	-0.283536	0.0344181	0.116275	down	no
MSTRG.155051	UGDH	ENST00000515021;ENST00000316423;ENST00000509391;ENST00000501493;ENST00000510490;ENST00000505698;ENST00000506179;ENST00000514106;ENST00000507089	0.79899	-0.323752	0.0344811	0.116275	down	no
MSTRG.142540	LRIG1	ENST00000273261;ENST00000383703	0.749912	-0.415206	0.0344941	0.116275	down	no
MSTRG.195359	ITPRID1	ENST00000451887;ENST00000319386;ENST00000615280;ENST00000409210	0.559202	-0.838558	0.0345113	0.116275	down	no
MSTRG.184018	MLIP	ENST00000514921;ENST00000505762;ENST00000370876;ENST00000503951;ENST00000370877;ENST00000514433;ENST00000502396;ENST00000447836;ENST00000274897;ENST00000460844	1.94629	0.960729	0.0345174	0.116275	up	no
MSTRG.31023	ZNF124	ENST00000543802;ENST00000472531;ENST00000340684;ENST00000491356	0.734416	-0.44533	0.0345448	0.116275	down	no
MSTRG.26619	RGS13	ENST00000543215;ENST00000391995	2.8096	1.49037	0.0346041	0.116275	up	no
MSTRG.22472	FCGR1B	ENST00000616817	0.362916	-1.46229	0.034621	0.116275	down	no
MSTRG.87362	FHOD1	ENST00000258201	1.55702	0.638792	0.0346384	0.116275	up	no
MSTRG.71764	PTGER2	ENST00000245457;ENST00000557436	0.681831	-0.552514	0.0347054	0.116275	down	no
MSTRG.85170	AC093512;ALDOA	ENST00000338110;ENST00000395240;ENST00000566846;ENST00000627059;ENST00000569798;ENST00000643777;ENST00000562679;ENST00000412304;ENST00000642816;ENST00000395248;ENST00000566897;ENST00000562168;ENST00000563060;ENST00000575627;ENST00000569545	0.789306	-0.341343	0.0347749	0.116275	down	no
MSTRG.183773	PKHD1	ENST00000371117;ENST00000340994	0.500442	-0.998725	0.034824	0.116275	down	no
MSTRG.121897	PLEKHA3	ENST00000234453;ENST00000421187	0.810031	-0.303951	0.0349464	0.116275	down	no
MSTRG.53578	PTHLH	ENST00000538310;ENST00000395868;ENST00000395872;ENST00000535992;ENST00000539239;ENST00000201015;ENST00000545234	0.480228	-1.05821	0.0349749	0.116275	down	no
MSTRG.220162	C9orf40	ENST00000376854	0.762947	-0.390345	0.034991	0.116275	down	no
MSTRG.211427	CPNE3	ENST00000517490;ENST00000620393;ENST00000621526;ENST00000621245;ENST00000522240;ENST00000517391;ENST00000621783;ENST00000523469	0.626919	-0.673648	0.0350429	0.116275	down	no
MSTRG.142364	SNTN	ENST00000496807;ENST00000469440	0.127001	-2.97708	0.0350482	0.116275	down	no
MSTRG.194919	GSDME	ENST00000645220;ENST00000409970;ENST00000415480;ENST00000342947;ENST00000446822;ENST00000414428;ENST00000430096	1.66955	0.739459	0.035076	0.116275	up	no
MSTRG.11889	AC236972	ENST00000458091	0.0303612	-5.04163	0.0350931	0.116275	down	no
MSTRG.209038	BPNT2	ENST00000262644;ENST00000517461	0.645396	-0.631742	0.0350932	0.116275	down	no
MSTRG.120824	METTL8	ENST00000438609;ENST00000442541;ENST00000375258;ENST00000442778;ENST00000453846;ENST00000612742	0.892375	-0.164278	0.0351416	0.116275	down	no
MSTRG.55864	OR10P1	ENST00000309675	0.00201625	-8.95411	0.0351539	0.116275	down	no
MSTRG.92470	MYO19	ENST00000621344;ENST00000616159;ENST00000614623;ENST00000613551;ENST00000616207;ENST00000622055	1.59809	0.676352	0.0351851	0.116275	up	no
MSTRG.42033	RASSF10	ENST00000529419	0.0486962	-4.36005	0.035196	0.116275	down	no
MSTRG.42585	HTATIP2	ENST00000443524;ENST00000532081;ENST00000421577;ENST00000451739;ENST00000532505;ENST00000530266;ENST00000419348	0.779813	-0.358801	0.0352441	0.116275	down	no
MSTRG.97040	PTPRM	ENST00000583289;ENST00000578916;ENST00000400053;ENST00000400060;ENST00000583153;ENST00000332175;ENST00000580170;ENST00000577468	1.40785	0.493496	0.0352607	0.116275	up	no
MSTRG.167568	ZNF622	ENST00000308683	0.919005	-0.121856	0.0352782	0.116275	down	no
MSTRG.92559	TADA2A	ENST00000612272;ENST00000615182;ENST00000620367;ENST00000621780	0.86168	-0.214776	0.0352875	0.116275	down	no
MSTRG.215880	ZNF623	ENST00000458270;ENST00000526926;ENST00000501748	0.878305	-0.187206	0.0353055	0.116275	down	no
MSTRG.141523	CISH	ENST00000348721	0.576253	-0.795226	0.0353191	0.116275	down	no
MSTRG.53236	GOLT1B	ENST00000229314;ENST00000631252	0.727153	-0.459669	0.0353208	0.116275	down	no
MSTRG.106536	SMG9	ENST00000601170;ENST00000597586;ENST00000270066	1.58866	0.667809	0.0353234	0.116275	up	no
MSTRG.8970	HTR2C	ENST00000371951	0.00984465	-6.66644	0.0353245	0.116275	down	no
MSTRG.27185	CAMSAP2	ENST00000236925;ENST00000413307;ENST00000358823;ENST00000475326	0.858954	-0.219347	0.035401	0.116275	down	no
MSTRG.207925	TM2D2	ENST00000522142;ENST00000517872;ENST00000456397;ENST00000397070;ENST00000456845	0.764176	-0.388023	0.0354162	0.116275	down	no
MSTRG.183079	TBCC	ENST00000372876	0.660077	-0.599294	0.035452	0.116275	down	no
MSTRG.45658	C11orf95	ENST00000546282;ENST00000433688;ENST00000338498	0.88521	-0.175909	0.0354621	0.116275	down	no
MSTRG.86621	PLLP	ENST00000613167;ENST00000219207;ENST00000564018	1.74635	0.804344	0.0355262	0.116275	up	no
ENSG00000187140	FOXD3	ENST00000371116	0.0842816	-3.56864	0.0355764	0.116275	down	no
MSTRG.28422	ESRRG	ENST00000391890;ENST00000366937	0.0663881	-3.91293	0.0355885	0.116275	down	no
MSTRG.125996	ERFE	ENST00000357303;ENST00000546354;ENST00000344233	0.719431	-0.475073	0.03568	0.116275	down	no
MSTRG.26966	DENND1B	ENST00000235453;ENST00000367396;ENST00000620048;ENST00000422998	0.684249	-0.547406	0.0356821	0.116275	down	no
MSTRG.35313	UBE2D1	ENST00000373910;ENST00000615793	0.700038	-0.514495	0.0357508	0.116275	down	no
MSTRG.97515	FAM210A	ENST00000402563;ENST00000592976;ENST00000589346;ENST00000322247;ENST00000651643	0.708119	-0.497935	0.0358405	0.116275	down	no
MSTRG.3910	PCSK1N	ENST00000218230	0.459336	-1.12238	0.0358808	0.116275	down	no
MSTRG.128310	NANP	ENST00000304788	0.790349	-0.339437	0.0358903	0.116275	down	no
MSTRG.73876	VASH1	ENST00000554237;ENST00000554743;ENST00000167106	1.84724	0.885372	0.0359322	0.116275	up	no
MSTRG.169325	PAIP1	ENST00000306846;ENST00000436644;ENST00000508537;ENST00000515338;ENST00000338972;ENST00000511321	0.680594	-0.555134	0.0359639	0.116275	down	no
MSTRG.126156	GPC1	ENST00000426280;ENST00000425056;ENST00000264039;ENST00000420138	2.30805	1.20667	0.0360667	0.116275	up	no
MSTRG.137625	KLHDC7B	ENST00000648057	0.44042	-1.18305	0.0361182	0.116275	down	no
MSTRG.116024	FHL2	ENST00000322142;ENST00000530340;ENST00000409177;ENST00000344213;ENST00000409807;ENST00000607522;ENST00000447958;ENST00000393353;ENST00000358129;ENST00000408995	0.820216	-0.285923	0.0361481	0.116275	down	no
MSTRG.210539	ZFHX4	ENST00000518282;ENST00000520307;ENST00000523809;ENST00000651020;ENST00000517585;ENST00000523885;ENST00000651372	1.89654	0.923368	0.0361634	0.116275	up	no
MSTRG.44895	TRIM51	ENST00000449290	0.00380287	-8.03869	0.0361868	0.116275	down	no
MSTRG.44564	ZNF408	ENST00000311764	0.868421	-0.203534	0.0362137	0.116339	down	no
MSTRG.173894	FBXL17	ENST00000542267;ENST00000496714	0.714876	-0.484236	0.0362273	0.116339	down	no
MSTRG.112118	NRXN1	ENST00000628515;ENST00000412315;ENST00000675235;ENST00000406316;ENST00000378262;ENST00000636345;ENST00000342183;ENST00000630656	0.579824	-0.786312	0.036251	0.116339	down	no
MSTRG.41574	ZNF214	ENST00000278314;ENST00000536068	0.773975	-0.369642	0.0363062	0.116339	down	no
MSTRG.202516	HILPDA;METTL2B	ENST00000435296;ENST00000257696;ENST00000419443;ENST00000262432;ENST00000480046;ENST00000481392	1.50304	0.587888	0.0363181	0.116339	up	no
MSTRG.19463	CTBS;GNG5	ENST00000370630;ENST00000370645;ENST00000370641	0.712097	-0.489854	0.0363688	0.116339	down	no
MSTRG.38756	TAF5	ENST00000369839	0.822962	-0.281102	0.0363708	0.116339	down	no
MSTRG.102565	PLIN4	ENST00000633942;ENST00000301286	1.76204	0.817249	0.0363747	0.116339	up	no
MSTRG.79475	BNIP2	ENST00000607373;ENST00000612191;ENST00000439052;ENST00000415213	0.727454	-0.459072	0.0364582	0.116339	down	no
MSTRG.154074	SLC34A2	ENST00000645788	0.0882066	-3.50297	0.0364618	0.116339	down	no
MSTRG.14731	TMEM200B	ENST00000521452;ENST00000420504	0.8305	-0.267948	0.0365559	0.116339	down	no
MSTRG.206640	TNFRSF10C	ENST00000356864	0.696985	-0.520801	0.0365649	0.116339	down	no
MSTRG.57323	RAB21	ENST00000261263	0.790488	-0.339185	0.0365878	0.116339	down	no
MSTRG.151443	MB21D2	ENST00000392452	0.873861	-0.194524	0.0366223	0.116339	down	no
MSTRG.113173	LGALSL	ENST00000238875;ENST00000464281	0.596952	-0.744314	0.0366324	0.116339	down	no
MSTRG.123528	ZDBF2	ENST00000649998;ENST00000611847;ENST00000649441;ENST00000650097;ENST00000374423;ENST00000649650;ENST00000649525	0.780957	-0.356684	0.0366941	0.116339	down	no
MSTRG.106521	PLAUR	ENST00000221264;ENST00000340093;ENST00000339082;ENST00000599546;ENST00000593714;ENST00000593447;ENST00000595038;ENST00000593939;ENST00000601723;ENST00000599892	0.782518	-0.353803	0.0367054	0.116339	down	no
MSTRG.49163	POGLUT3	ENST00000323468;ENST00000530318;ENST00000434945	0.726427	-0.46111	0.0367325	0.116339	down	no
MSTRG.90662	HS3ST3B1	ENST00000360954	0.451063	-1.1486	0.0367605	0.116339	down	no
MSTRG.107955	ZNF579	ENST00000325421;ENST00000592239	0.766995	-0.38271	0.0367756	0.116339	down	no
MSTRG.21403	AKNAD1;CLCC1	ENST00000369995;ENST00000356970;ENST00000674849;ENST00000675956;ENST00000369994;ENST00000369968;ENST00000675018;ENST00000675654;ENST00000675508;ENST00000369970;ENST00000676059;ENST00000675571;ENST00000676392;ENST00000357393;ENST00000369969;ENST00000370001	1.41301	0.498767	0.0368034	0.116339	up	no
MSTRG.70265	BAZ1A	ENST00000360310;ENST00000358716;ENST00000556314;ENST00000382422	0.959265	-0.0599988	0.0368312	0.116339	down	no
MSTRG.18999	MIGA1	ENST00000443751;ENST00000645756;ENST00000643390;ENST00000370791;ENST00000642959;ENST00000646892	0.765034	-0.386404	0.0368708	0.116339	down	no
MSTRG.82777	TPSG1	ENST00000234798	0.379554	-1.39762	0.0369937	0.116339	down	no
MSTRG.82451	MEF2A	ENST00000557785;ENST00000449277;ENST00000338042;ENST00000560493;ENST00000559903;ENST00000354410;ENST00000557942;ENST00000558812	1.6573	0.728834	0.0370238	0.116339	up	no
MSTRG.189362	SERINC1	ENST00000339697	0.654683	-0.611131	0.0370344	0.116339	down	no
MSTRG.73237	SLC8A3	ENST00000381269;ENST00000533541;ENST00000356921;ENST00000357887	2.75628	1.46272	0.0370824	0.116339	up	no
MSTRG.39540	TRUB1	ENST00000298746	0.647319	-0.627451	0.0370855	0.116339	down	no
MSTRG.198112	SBDS	ENST00000246868	0.942949	-0.0847483	0.0370987	0.116339	down	no
ENSG00000198354	DCAF12L2	ENST00000360028	0.445259	-1.16728	0.0371225	0.116339	down	no
MSTRG.179122	CPLX2	ENST00000359546;ENST00000512824;ENST00000515025;ENST00000502265;ENST00000515094	0.401962	-1.31487	0.0371706	0.116339	down	no
MSTRG.135243	GSTT4	ENST00000621179	0.00386536	-8.01518	0.0371886	0.116339	down	no
MSTRG.120229	KCNH7	ENST00000332142	0.29851	-1.74415	0.0372084	0.116339	down	no
MSTRG.44626	OR4X1	ENST00000320048	0.00195845	-8.99607	0.0372722	0.116339	down	no
MSTRG.92513	LHX1	ENST00000614239	0.0106018	-6.55955	0.0372722	0.116339	down	no
ENSG00000181698	OR5T1	ENST00000641368	0.00319698	-8.28907	0.0372722	0.116339	down	no
MSTRG.59230	CFAP54	ENST00000524981;ENST00000550977	0.660648	-0.598046	0.037304	0.116399	down	no
MSTRG.220001	ABHD17B;CEMIP2	ENST00000333421;ENST00000377066;ENST00000377043;ENST00000396272;ENST00000377055;ENST00000377041;ENST00000377044;ENST00000545719	0.92085	-0.118962	0.0373451	0.116461	down	no
MSTRG.158875	GRID2	ENST00000637838;ENST00000282020	0.109472	-3.19137	0.0373679	0.116514	down	no
MSTRG.15648	OXCT2	ENST00000327582	2.36902	1.24429	0.0373687	0.116514	up	no
MSTRG.98727	MOCOS	ENST00000261326	0.873601	-0.194954	0.0373836	0.116531	down	no
MSTRG.137636	SHANK3	ENST00000262795;ENST00000659388	3.89903	1.96311	0.037403	0.116531	up	no
ENSG00000203784	LELP1	ENST00000368747	16.343	4.0306	0.0374249	0.116531	up	no
MSTRG.41389	OR51B6	ENST00000380219	0.373008	-1.42272	0.0374339	0.116531	down	no
MSTRG.38426	BLOC1S2	ENST00000614731;ENST00000441611;ENST00000618916;ENST00000370372;ENST00000579542	0.70129	-0.511916	0.0374431	0.116531	down	no
MSTRG.61354	BRI3BP	ENST00000671775;ENST00000672415	0.868516	-0.203375	0.0375144	0.116531	down	no
MSTRG.178780	FBXW11	ENST00000265094;ENST00000393802;ENST00000517395;ENST00000296933;ENST00000518752	0.925758	-0.111294	0.0375836	0.116531	down	no
MSTRG.1667	EIF1AX	ENST00000379607	0.57439	-0.799897	0.0376119	0.116531	down	no
MSTRG.152170	RNF212	ENST00000433731;ENST00000333673;ENST00000382968	0.817722	-0.290317	0.0376368	0.116531	down	no
MSTRG.29315	SDE2	ENST00000272091	0.662793	-0.59337	0.0376405	0.116531	down	no
MSTRG.58215	TMTC2	ENST00000549919;ENST00000321196;ENST00000548305	0.665313	-0.587895	0.0376471	0.116531	down	no
ENSG00000204572	KRTAP5-10	ENST00000398531	6.96369	2.79985	0.0376582	0.116531	up	no
MSTRG.115998	C2orf49	ENST00000258457;ENST00000410049	0.75797	-0.399788	0.0376973	0.116531	down	no
MSTRG.191375	GINM1	ENST00000433539;ENST00000367419	0.796826	-0.327663	0.0377048	0.116531	down	no
MSTRG.91713	DHRS13	ENST00000378895;ENST00000394901	0.669513	-0.578815	0.0377418	0.116531	down	no
MSTRG.159176	UNC5C	ENST00000513796;ENST00000506749;ENST00000610318;ENST00000453304;ENST00000504962	0.581549	-0.782027	0.0377793	0.116531	down	no
MSTRG.55457	TFCP2	ENST00000549867;ENST00000548115;ENST00000257915	1.43137	0.517402	0.0378194	0.116531	up	no
MSTRG.73364	DPF3	ENST00000610283;ENST00000614862;ENST00000556509	2.44016	1.28698	0.0378503	0.116531	up	no
MSTRG.53386	BCAT1	ENST00000261192;ENST00000538118;ENST00000539282;ENST00000539780;ENST00000342945;ENST00000546285	0.600153	-0.736598	0.0378754	0.116531	down	no
MSTRG.16439	CMPK1	ENST00000371873;ENST00000450808;ENST00000471289	0.685463	-0.544849	0.0379209	0.116531	down	no
MSTRG.194881	STK31	ENST00000422637;ENST00000355870;ENST00000354639	0.616183	-0.69857	0.0379306	0.116531	down	no
MSTRG.195037	CBX3	ENST00000396386;ENST00000456948;ENST00000462165;ENST00000409747;ENST00000337620	0.718095	-0.477754	0.0379348	0.116531	down	no
MSTRG.4541	USP51	ENST00000500968;ENST00000586165	0.839221	-0.252878	0.037955	0.116531	down	no
MSTRG.62080	CRYL1	ENST00000298248;ENST00000382812;ENST00000480748;ENST00000644593;ENST00000643750	0.798949	-0.323824	0.0379923	0.116531	down	no
MSTRG.1987	DDX53	ENST00000327968	0.346894	-1.52743	0.0379937	0.116531	down	no
MSTRG.69380	CDH24	ENST00000487137;ENST00000397359;ENST00000267383;ENST00000554034	2.44858	1.29195	0.0380301	0.116531	up	no
MSTRG.163703	PLRG1	ENST00000499023;ENST00000503251;ENST00000302078;ENST00000504341	0.822297	-0.282269	0.0381164	0.116531	down	no
MSTRG.33297	ACBD5	ENST00000375897;ENST00000375888;ENST00000375905;ENST00000396271;ENST00000412279;ENST00000426079	0.808703	-0.306318	0.0381602	0.116531	down	no
MSTRG.224168	GOLGA2	ENST00000450617;ENST00000490628;ENST00000421699;ENST00000611957;ENST00000458730	1.51059	0.595112	0.0381768	0.116531	up	no
MSTRG.135154	GNAZ	ENST00000615612	0.855907	-0.224474	0.0383032	0.116531	down	no
MSTRG.94649	RPS6KB1	ENST00000443572;ENST00000592726;ENST00000393021;ENST00000225577	0.950182	-0.0737249	0.0383267	0.116531	down	no
MSTRG.131127	PSMA7	ENST00000370873;ENST00000370858;ENST00000442551	0.786324	-0.346805	0.0383709	0.116531	down	no
MSTRG.62158	MRPL57	ENST00000309594	0.81944	-0.287289	0.0383946	0.116531	down	no
MSTRG.190431	PEX7	ENST00000318471;ENST00000541292;ENST00000367756	0.528517	-0.919978	0.0384196	0.116536	down	no
MSTRG.149600	SERPINI2;WDR49	ENST00000471111;ENST00000476257;ENST00000466903;ENST00000472600;ENST00000647816;ENST00000264677;ENST00000479765;ENST00000466760;ENST00000616363;ENST00000308378	1.81193	0.857523	0.0384289	0.116555	up	no
MSTRG.151098	MASP1	ENST00000392472;ENST00000337774;ENST00000425937;ENST00000392475;ENST00000296280;ENST00000169293;ENST00000392470	3.30116	1.72297	0.0384763	0.116662	up	no
MSTRG.70938	FBXO33	ENST00000298097;ENST00000554190	0.734982	-0.444218	0.0385217	0.116744	down	no
MSTRG.180848	DEK	ENST00000652689;ENST00000507591;ENST00000515742;ENST00000651992;ENST00000652576	0.712756	-0.488519	0.0385749	0.116856	down	no
MSTRG.108286	FAM110C	ENST00000327669	0.477317	-1.06698	0.0385954	0.116899	down	no
MSTRG.23737	IQGAP3	ENST00000361170	2.03693	1.02639	0.0386115	0.116926	up	no
ENSG00000271567	PPIAL4E	ENST00000581164	0.329994	-1.59949	0.0386395	0.116969	down	no
MSTRG.145573	ZDHHC23	ENST00000496083;ENST00000330212;ENST00000638807;ENST00000491556	0.695775	-0.523307	0.0386669	0.116982	down	no
MSTRG.9177	KLHL13	ENST00000371876;ENST00000469946;ENST00000545703;ENST00000540167;ENST00000262820;ENST00000541812;ENST00000453826;ENST00000371882	0.659978	-0.599511	0.0386848	0.116982	down	no
MSTRG.99850	MAPK4	ENST00000588540;ENST00000400384	0.301943	-1.72765	0.0387195	0.116982	down	no
MSTRG.15003	TMEM234	ENST00000344461;ENST00000373593;ENST00000309777	1.61077	0.687749	0.0387914	0.116982	up	no
MSTRG.25690	FAM163A	ENST00000341785	0.470987	-1.08624	0.0388044	0.116982	down	no
MSTRG.93779	PHB	ENST00000504124;ENST00000419140;ENST00000617874;ENST00000614445;ENST00000300408;ENST00000446735	0.72744	-0.4591	0.0388175	0.116982	down	no
MSTRG.150944	SENP2	ENST00000296257;ENST00000444509	0.860971	-0.215964	0.0388461	0.116982	down	no
MSTRG.95890	SEC14L1	ENST00000443798;ENST00000589202;ENST00000430767;ENST00000392476;ENST00000436233;ENST00000590483;ENST00000589827;ENST00000586429;ENST00000588616;ENST00000585618;ENST00000587820;ENST00000588880	1.55532	0.637216	0.0388981	0.116982	up	no
MSTRG.218683	RGP1	ENST00000378078	0.720197	-0.473536	0.0389335	0.116982	down	no
MSTRG.152635	EVC	ENST00000264956	1.54702	0.629489	0.038942	0.116982	up	no
MSTRG.154900	RELL1	ENST00000454158;ENST00000314117;ENST00000512114	0.779821	-0.358785	0.0389664	0.116982	down	no
MSTRG.78069	TMEM87A	ENST00000389834;ENST00000307216;ENST00000566474;ENST00000568432;ENST00000448392;ENST00000561578	0.765302	-0.385898	0.0390488	0.116982	down	no
MSTRG.46201	GAL	ENST00000265643	0.00262328	-8.57441	0.0391315	0.116982	down	no
MSTRG.180585	TBC1D7	ENST00000420456;ENST00000607658;ENST00000379307;ENST00000422136;ENST00000379300;ENST00000343141;ENST00000428109;ENST00000356436;ENST00000446018;ENST00000452989;ENST00000607230;ENST00000606541;ENST00000606214;ENST00000379291;ENST00000606530;ENST00000606370;ENST00000450347	0.942625	-0.0852447	0.0391814	0.116982	down	no
MSTRG.82830	MSRB1	ENST00000361871;ENST00000622125;ENST00000473663;ENST00000399753;ENST00000564908	0.697774	-0.519168	0.0391895	0.116982	down	no
MSTRG.73094	RDH12	ENST00000551171	2.27202	1.18398	0.0392196	0.116982	up	no
MSTRG.56086	TSPAN31	ENST00000257910;ENST00000547472;ENST00000547992;ENST00000548167;ENST00000552816	0.743654	-0.427297	0.0392491	0.116982	down	no
MSTRG.140581	ACAA1	ENST00000333167;ENST00000301810;ENST00000421218;ENST00000452171	0.896757	-0.157211	0.0392687	0.116982	down	no
MSTRG.181379	GPLD1	ENST00000230036	0.815873	-0.293584	0.0392978	0.116982	down	no
MSTRG.11040	MAGEC3	ENST00000298296;ENST00000443323;ENST00000544766	0.236428	-2.08052	0.0393588	0.116982	down	no
MSTRG.172860	NR2F1	ENST00000327111	2.83735	1.50454	0.0393718	0.116982	up	no
MSTRG.61083	CFAP251;PSMD9	ENST00000288912;ENST00000538613;ENST00000397454;ENST00000261817;ENST00000542602;ENST00000541212	1.01748	0.0250031	0.0393891	0.116982	up	no
MSTRG.112991	CCT4	ENST00000394440;ENST00000544079	0.681443	-0.553335	0.0394117	0.116982	down	no
MSTRG.69956	G2E3	ENST00000206595;ENST00000554714;ENST00000553504;ENST00000547532;ENST00000438909;ENST00000550944	0.844084	-0.244541	0.0394577	0.116982	down	no
MSTRG.116546	SLC20A1	ENST00000272542;ENST00000423633;ENST00000433924	0.866515	-0.206703	0.0394683	0.116982	down	no
MSTRG.31255	GTPBP4	ENST00000360803;ENST00000360059	0.97736	-0.0330385	0.0394709	0.116982	down	no
MSTRG.70404	SFTA3;NKX2-1	ENST00000518529;ENST00000518149;ENST00000354822	0.273817	-1.86872	0.0394746	0.116982	down	no
MSTRG.51851	SCNN1A	ENST00000396966;ENST00000228916;ENST00000360168;ENST00000543768;ENST00000540037	0.583669	-0.776778	0.0394815	0.116982	down	no
MSTRG.186295	RIPPLY2	ENST00000369687;ENST00000369689	0.404978	-1.30408	0.0394942	0.116982	down	no
MSTRG.45994	B4GAT1	ENST00000311181	0.748924	-0.41711	0.0395232	0.116982	down	no
MSTRG.175322	ISOC1	ENST00000173527	0.680811	-0.554675	0.0395408	0.116982	down	no
MSTRG.27493	RBBP5	ENST00000264515;ENST00000367164	0.902306	-0.148311	0.0395874	0.116982	down	no
MSTRG.156446	NOA1	ENST00000264230	0.799419	-0.322975	0.0395951	0.116982	down	no
MSTRG.22880	GJA8	ENST00000369235	0.00312862	-8.32026	0.0396167	0.116982	down	no
ENSG00000230522	MBD3L2	ENST00000381393	0.00179496	-9.12183	0.0396167	0.116982	down	no
ENSG00000132693	CRP	ENST00000255030	0.00456096	-7.77645	0.0396167	0.116982	down	no
MSTRG.36050	SIRT1	ENST00000432464;ENST00000403579;ENST00000212015;ENST00000406900	0.947386	-0.077976	0.0396341	0.117015	down	no
MSTRG.209716	CRH	ENST00000276571	0.00272499	-8.51953	0.0396354	0.117016	down	no
MSTRG.83917	NPIPA2	ENST00000553201;ENST00000530328;ENST00000529166	1.74686	0.804768	0.0396677	0.117077	up	no
MSTRG.73548	LIN52	ENST00000554938;ENST00000555028;ENST00000674221	0.98166	-0.0267045	0.0396754	0.11709	down	no
MSTRG.15500	C1orf109	ENST00000486637;ENST00000491981;ENST00000477060;ENST00000464085;ENST00000461359;ENST00000619962;ENST00000358011	0.770798	-0.375575	0.0397007	0.117133	down	no
MSTRG.103976	SMIM7;SLC35E1;CHERP;CALR3;MED26	ENST00000627144;ENST00000487416;ENST00000595753;ENST00000436553;ENST00000198939;ENST00000269881;ENST00000601478;ENST00000598492;ENST00000598608;ENST00000546361;ENST00000421082;ENST00000597711;ENST00000263390;ENST00000600060;ENST00000358726	0.994989	-0.00724699	0.0397129	0.117162	down	no
MSTRG.115354	STARD7	ENST00000337288;ENST00000443962	0.724709	-0.464526	0.0397175	0.117169	down	no
MSTRG.71628	RPS29	ENST00000556230;ENST00000557111;ENST00000396020;ENST00000554075;ENST00000245458	0.604003	-0.727372	0.0397602	0.117259	down	no
MSTRG.103220	CDKN2D	ENST00000393599	0.683189	-0.549643	0.0397896	0.117306	down	no
ENSG00000276040	SPATA31A7	ENST00000619167	0.0246758	-5.34076	0.0398492	0.11733	down	no
MSTRG.17774	PGM1	ENST00000650546;ENST00000371084;ENST00000540265;ENST00000371083	0.703047	-0.508306	0.0398948	0.117427	down	no
MSTRG.129683	WFDC8	ENST00000357199;ENST00000289953	29.9114	4.90262	0.0399106	0.117456	up	no
MSTRG.46109	AIP	ENST00000279146;ENST00000528641;ENST00000525341	0.795828	-0.329471	0.0399115	0.117456	down	no
MSTRG.102101	ARID3A	ENST00000263620	2.14158	1.09867	0.0399289	0.117484	up	no
MSTRG.223887	PPP6C	ENST00000451402;ENST00000373547;ENST00000456642;ENST00000415905	0.656274	-0.607629	0.0399632	0.117538	down	no
MSTRG.84185	ARL6IP1;RPS15A;AC138811	ENST00000304414;ENST00000563390;ENST00000546206;ENST00000567078;ENST00000322989;ENST00000576436;ENST00000569083;ENST00000565420	0.805328	-0.312352	0.0399743	0.117561	down	no
MSTRG.87723	MTSS2	ENST00000562883;ENST00000338779;ENST00000616026;ENST00000576338	1.78196	0.833464	0.0399749	0.117561	up	no
MSTRG.97667	MIB1	ENST00000261537	0.754939	-0.405568	0.0399793	0.117563	down	no
MSTRG.102736	CATSPERD	ENST00000381624	0.466178	-1.10105	0.0399911	0.117589	down	no
MSTRG.158267	HELQ	ENST00000295488;ENST00000510985	0.793054	-0.334509	0.0400108	0.117621	down	no
MSTRG.116597	RABL2A	ENST00000393165;ENST00000393167;ENST00000409842;ENST00000376439;ENST00000409875;ENST00000393166;ENST00000413545	1.61461	0.691184	0.0400678	0.117627	up	no
MSTRG.212062	C8orf37	ENST00000286688	0.74532	-0.424067	0.0400691	0.117627	down	no
MSTRG.83030	ZNF200	ENST00000396868;ENST00000431561;ENST00000414144;ENST00000396870;ENST00000575948;ENST00000396871	0.882199	-0.180825	0.0400695	0.117627	down	no
MSTRG.39641	PDZD8	ENST00000334464	0.833425	-0.262876	0.0400896	0.117627	down	no
MSTRG.119197	LYPD6	ENST00000409381;ENST00000334166	0.380236	-1.39503	0.0400926	0.117627	down	no
MSTRG.155636	NFXL1	ENST00000381538;ENST00000329043;ENST00000507489	0.85081	-0.233091	0.0400936	0.117627	down	no
MSTRG.145496	GTPBP8	ENST00000473129;ENST00000383677;ENST00000383678;ENST00000619116;ENST00000467752	0.773729	-0.3701	0.0400953	0.117627	down	no
MSTRG.185246	CGAS	ENST00000370315;ENST00000370318	0.785463	-0.348384	0.0401286	0.117627	down	no
ENSG00000183862	CNGA2	ENST00000329903	0.00641725	-7.28383	0.0401367	0.117627	down	no
MSTRG.86493	GNAO1	ENST00000569295;ENST00000563661;ENST00000262494;ENST00000570235;ENST00000262493;ENST00000638705	2.55507	1.35336	0.0401707	0.117627	up	no
MSTRG.32990	KIAA1217	ENST00000376454;ENST00000635504;ENST00000307544;ENST00000396446;ENST00000438429;ENST00000635163;ENST00000396445;ENST00000376452;ENST00000376462;ENST00000376451;ENST00000636305	2.57976	1.36723	0.0402291	0.117627	up	no
MSTRG.180155	DSP	ENST00000418664;ENST00000379802	0.644741	-0.633209	0.0402569	0.117627	down	no
MSTRG.108570	ALLC	ENST00000252505	0.00486686	-7.68279	0.0402708	0.117627	down	no
MSTRG.149078	GFM1	ENST00000264263;ENST00000464732;ENST00000486715;ENST00000478576;ENST00000472383	0.759902	-0.396116	0.0402906	0.117627	down	no
MSTRG.79978	SMAD3	ENST00000537194;ENST00000559092;ENST00000558428;ENST00000560424;ENST00000558739;ENST00000540846;ENST00000327367	1.52736	0.611039	0.0403033	0.117627	up	no
MSTRG.224404	EXOSC2	ENST00000372358;ENST00000372351;ENST00000495699;ENST00000546165;ENST00000372352	0.968965	-0.0454838	0.0403062	0.117627	down	no
MSTRG.92413	CCL14;CCL15	ENST00000620991;ENST00000618404;ENST00000614009;ENST00000622526;ENST00000617897	5.65882	2.5005	0.0403287	0.117627	up	no
MSTRG.152910	USP17L28	ENST00000504543	0.593974	-0.751529	0.0403476	0.117627	down	no
MSTRG.88922	HSDL1	ENST00000564998;ENST00000219439;ENST00000568857	0.886445	-0.173897	0.0403849	0.117627	down	no
MSTRG.73326	MAP3K9	ENST00000555993;ENST00000554752;ENST00000381250;ENST00000553414;ENST00000611979	0.666781	-0.584715	0.0404022	0.117627	down	no
MSTRG.21752	WNT2B	ENST00000369686;ENST00000369684;ENST00000256640	1.6358	0.709996	0.0405135	0.117627	up	no
MSTRG.20554	DPYD	ENST00000370192;ENST00000306031	0.767631	-0.381516	0.0405183	0.117627	down	no
MSTRG.38738	NT5C2	ENST00000675985;ENST00000674860;ENST00000676428;ENST00000421281;ENST00000675326;ENST00000404739;ENST00000675645;ENST00000343289	0.910925	-0.134596	0.040519	0.117627	down	no
MSTRG.224396	ASS1	ENST00000352480;ENST00000422569;ENST00000372393	0.775025	-0.367684	0.0405412	0.117627	down	no
MSTRG.190496	PERP	ENST00000421351	0.504462	-0.987182	0.0406345	0.117627	down	no
MSTRG.72242	NAA30	ENST00000556492;ENST00000298406;ENST00000554703;ENST00000555166	0.748953	-0.417053	0.0406738	0.117627	down	no
MSTRG.197510	ZNF716	ENST00000420713	0.0340365	-4.87677	0.0407254	0.117627	down	no
MSTRG.86463	CES5A	ENST00000541580;ENST00000521992	0.0070021	-7.158	0.040742	0.117627	down	no
ENSG00000094661	OR1I1	ENST00000641398;ENST00000209540	0.108068	-3.20999	0.0407555	0.117627	down	no
MSTRG.109079	PDIA6	ENST00000404371;ENST00000540494;ENST00000272227;ENST00000458536	0.611419	-0.709766	0.040819	0.117627	down	no
MSTRG.107568	FPR2	ENST00000598776;ENST00000600722;ENST00000340023;ENST00000600258;ENST00000599326	0.198694	-2.33138	0.0408212	0.117627	down	no
MSTRG.4645	KLF8	ENST00000640927;ENST00000374928;ENST00000468660	1.51998	0.604056	0.0408512	0.117627	up	no
MSTRG.46542	CLPB	ENST00000542555;ENST00000544683;ENST00000543042;ENST00000294053;ENST00000646117;ENST00000642288;ENST00000437826;ENST00000539148;ENST00000538039;ENST00000340729	0.971375	-0.0418997	0.0408742	0.117627	down	no
MSTRG.14416	ARID1A	ENST00000430799;ENST00000636219;ENST00000374152;ENST00000615191;ENST00000524572;ENST00000324856;ENST00000637465	1.53964	0.622597	0.0408802	0.117627	up	no
MSTRG.168636	C1QTNF3;AMACR	ENST00000231338;ENST00000382065;ENST00000382085;ENST00000335606;ENST00000382072;ENST00000426255	1.6701	0.739937	0.0408822	0.117627	up	no
MSTRG.216443	ERMP1	ENST00000339450	0.708369	-0.497428	0.0409597	0.117796	down	no
MSTRG.222906	UGCG	ENST00000374279	0.776086	-0.365711	0.0410006	0.117878	down	no
MSTRG.38670	PCGF6	ENST00000369847;ENST00000337211	0.863061	-0.212466	0.0410673	0.118004	down	no
MSTRG.92466	TBC1D3G	ENST00000569055	2.13306	1.09292	0.0410778	0.118025	up	no
MSTRG.147188	TF;SRPRB	ENST00000482271;ENST00000466490;ENST00000466911;ENST00000484684;ENST00000402696	0.582763	-0.779019	0.0411086	0.118072	down	no
MSTRG.61410	AACS	ENST00000316519	1.64407	0.717267	0.0411327	0.118097	up	no
MSTRG.19557	CLCA1	ENST00000234701	0.0344279	-4.86028	0.0411534	0.118143	down	no
MSTRG.20762	VCAM1	ENST00000294728;ENST00000370119;ENST00000347652	0.572037	-0.805819	0.0411659	0.118173	down	no
MSTRG.195905	ELMO1	ENST00000455879;ENST00000442504;ENST00000433246;ENST00000424212;ENST00000448602;ENST00000310758;ENST00000396040;ENST00000445322;ENST00000396045;ENST00000455119	1.66822	0.738313	0.0412057	0.118247	up	no
MSTRG.85374	ZNF843	ENST00000564218;ENST00000618063;ENST00000315678	0.779241	-0.359859	0.0412124	0.118262	down	no
MSTRG.105547	HAMP	ENST00000598398;ENST00000222304	2.81995	1.49567	0.0412276	0.118269	up	no
MSTRG.212825	FZD6	ENST00000522566;ENST00000523739;ENST00000358755	0.686808	-0.54202	0.041248	0.118269	down	no
MSTRG.106441	PHLDB3	ENST00000599242;ENST00000594808;ENST00000292140;ENST00000601646;ENST00000596141	1.71591	0.778974	0.0412954	0.118358	up	no
MSTRG.46047	SYT12	ENST00000525457;ENST00000527043;ENST00000393946	2.32321	1.21612	0.0413379	0.118404	up	no
MSTRG.162595	ELMOD2	ENST00000323570;ENST00000507667;ENST00000502397;ENST00000513606;ENST00000511887	0.654279	-0.612023	0.0413441	0.118404	down	no
MSTRG.161335	FGF2	ENST00000608478;ENST00000264498	0.641536	-0.640397	0.0413767	0.118404	down	no
MSTRG.38404	DNMBP	ENST00000636706;ENST00000324109;ENST00000543621	1.52916	0.612735	0.041386	0.118404	up	no
MSTRG.181790	GPX5	ENST00000412168	0.028842	-5.11568	0.041413	0.118404	down	no
MSTRG.163029	ZNF827	ENST00000513320;ENST00000656985;ENST00000503462;ENST00000511659;ENST00000513840;ENST00000379448;ENST00000509940;ENST00000508784;ENST00000655597	1.57883	0.658855	0.0414259	0.118404	up	no
MSTRG.212848	RIMS2	ENST00000507740;ENST00000436393;ENST00000666250;ENST00000523362;ENST00000339750;ENST00000515551;ENST00000507677;ENST00000668113	0.669448	-0.578955	0.041444	0.118404	down	no
MSTRG.204293	TMEM176B	ENST00000326442;ENST00000447204;ENST00000429904;ENST00000434545;ENST00000450753;ENST00000492607	0.440457	-1.18293	0.0414526	0.118404	down	no
MSTRG.140796	TRAK1	ENST00000613405;ENST00000396175;ENST00000673621;ENST00000327628;ENST00000484786;ENST00000672026;ENST00000341421	2.05708	1.04059	0.0414913	0.118404	up	no
MSTRG.22160	TENT5C	ENST00000369448	0.649414	-0.622789	0.0415103	0.118404	down	no
MSTRG.151818	RNF168	ENST00000318037	0.837747	-0.255413	0.041553	0.118404	down	no
MSTRG.106862	IRF2BP1	ENST00000302165	0.819517	-0.287155	0.0416174	0.118404	down	no
MSTRG.27430	SOX13	ENST00000367204;ENST00000525442;ENST00000528591;ENST00000618875	2.02207	1.01583	0.0416225	0.118404	up	no
MSTRG.212742	AZIN1	ENST00000347770;ENST00000337198;ENST00000518353;ENST00000520402	0.631442	-0.663278	0.0416561	0.118404	down	no
MSTRG.44497	SLC35C1	ENST00000314134;ENST00000442528;ENST00000530471;ENST00000526817	0.779416	-0.359534	0.0416682	0.118404	down	no
MSTRG.29600	NUP133	ENST00000261396	0.898362	-0.154632	0.0416804	0.118404	down	no
MSTRG.70696	SEC23A	ENST00000548032;ENST00000307712;ENST00000553970;ENST00000555425;ENST00000557437;ENST00000545328;ENST00000537403;ENST00000555017;ENST00000625395	0.715725	-0.482523	0.0417157	0.118404	down	no
MSTRG.83019	IL32	ENST00000526464;ENST00000325568;ENST00000531965;ENST00000525377;ENST00000534507;ENST00000551513;ENST00000530538;ENST00000675975;ENST00000396890;ENST00000528163;ENST00000440815;ENST00000548476;ENST00000396887;ENST00000444393;ENST00000549213;ENST00000548807;ENST00000548652;ENST00000008180;ENST00000552356	2.73694	1.45256	0.0417356	0.118404	up	no
MSTRG.58378	ALX1	ENST00000316824	0.00289917	-8.43014	0.0417674	0.118404	down	no
MSTRG.191931	TFB1M	ENST00000367166	1.68788	0.755211	0.0417718	0.118404	up	no
ENSG00000186113	OR5D14	ENST00000335605	0.00191876	-9.02561	0.0417726	0.118404	down	no
MSTRG.112509	CCDC85A	ENST00000407595	0.650923	-0.619442	0.0417912	0.118404	down	no
MSTRG.56652	C12orf66	ENST00000311915;ENST00000398055	0.759856	-0.396201	0.0417942	0.118404	down	no
MSTRG.146874	IFT122	ENST00000348417;ENST00000509522;ENST00000296266;ENST00000349441;ENST00000431818;ENST00000507564;ENST00000347300;ENST00000440957;ENST00000514275;ENST00000507221;ENST00000515783;ENST00000512157	1.5282	0.611834	0.0418082	0.118404	up	no
MSTRG.138517	TTLL3;ARPC4;ARPC4-TTLL3	ENST00000455274;ENST00000433034;ENST00000426827;ENST00000397261;ENST00000419081;ENST00000310252;ENST00000430718;ENST00000397256;ENST00000383827;ENST00000426895;ENST00000498623;ENST00000430793;ENST00000452823;ENST00000485273;ENST00000443148;ENST00000471058;ENST00000453882	1.52282	0.606749	0.0418294	0.118404	up	no
MSTRG.121066	ATF2	ENST00000392544;ENST00000264110;ENST00000426833;ENST00000409833;ENST00000409437;ENST00000435004;ENST00000437522;ENST00000345739	0.928467	-0.107078	0.0418353	0.118404	down	no
MSTRG.221122	SHC3	ENST00000375835;ENST00000375831	2.5354	1.34221	0.0418838	0.118404	up	no
MSTRG.106171	BLVRB	ENST00000263368;ENST00000595483;ENST00000643519	0.727459	-0.459062	0.0419107	0.118404	down	no
MSTRG.38226	MMS19	ENST00000434538;ENST00000327238;ENST00000355839;ENST00000444411;ENST00000438925;ENST00000422685	1.38605	0.470979	0.0419156	0.118404	up	no
MSTRG.117849	POTEJ	ENST00000409602	0.322628	-1.63206	0.0419795	0.118404	down	no
MSTRG.6577	TENT5D	ENST00000538312;ENST00000308293	0.0368991	-4.76027	0.0419808	0.118404	down	no
MSTRG.38106	TM9SF3	ENST00000371142;ENST00000443638	0.636725	-0.651258	0.0420352	0.118404	down	no
MSTRG.9447	ZBTB33	ENST00000326624;ENST00000557385	0.708409	-0.497345	0.0420408	0.118404	down	no
MSTRG.172104	VCAN	ENST00000513960;ENST00000513984;ENST00000343200;ENST00000265077;ENST00000512590;ENST00000502527;ENST00000342785	2.45624	1.29645	0.0420566	0.118404	up	no
MSTRG.107807	RPS9	ENST00000391753;ENST00000391751;ENST00000441429;ENST00000626547;ENST00000391752;ENST00000402367;ENST00000302907	0.732465	-0.449168	0.0420681	0.118404	down	no
MSTRG.83316	RBFOX1	ENST00000547338;ENST00000641259;ENST00000675459	0.170072	-2.55578	0.042076	0.118404	down	no
MSTRG.193475	PMS2	ENST00000642292;ENST00000644110;ENST00000265849;ENST00000642456	0.972	-0.0409718	0.0420829	0.118404	down	no
MSTRG.89895	AC233723	ENST00000635921	0.471433	-1.08487	0.0421028	0.118404	down	no
MSTRG.94525	SEPTIN4	ENST00000393086;ENST00000581607;ENST00000580844;ENST00000577729;ENST00000580809;ENST00000583291;ENST00000426861;ENST00000672699;ENST00000321691;ENST00000672673;ENST00000317268;ENST00000317256;ENST00000583114	2.00271	1.00195	0.0422032	0.118404	up	no
MSTRG.86333	IRX3	ENST00000329734	2.80129	1.48609	0.0422175	0.118404	up	no
ENSG00000269433	OPN1MW3	ENST00000599405	0.00479308	-7.70483	0.0422239	0.118404	down	no
MSTRG.41298	MMP26	ENST00000380390	0.00311068	-8.32855	0.0422239	0.118404	down	no
ENSG00000254834	OR5M10	ENST00000526812	0.00254356	-8.61893	0.0422239	0.118404	down	no
MSTRG.151219	TMEM207	ENST00000354905	0.00351702	-8.15143	0.0422239	0.118404	down	no
MSTRG.18884	ST6GALNAC5	ENST00000477717	0.599481	-0.738214	0.0422411	0.11842	down	no
MSTRG.97595	ESCO1	ENST00000622333;ENST00000269214	0.911271	-0.134048	0.042289	0.118451	down	no
MSTRG.152447	STX18	ENST00000306200;ENST00000505286;ENST00000507908	1.50952	0.594093	0.0423721	0.118591	up	no
MSTRG.182235	HSPA1L	ENST00000375654	0.838613	-0.253923	0.042386	0.118623	down	no
MSTRG.201893	ING3	ENST00000445699;ENST00000339121;ENST00000315870;ENST00000431467	0.756036	-0.403474	0.042429	0.118703	down	no
MSTRG.106345	RABAC1;ATP1A3	ENST00000601078;ENST00000222008;ENST00000473086;ENST00000600292;ENST00000602133;ENST00000601891;ENST00000545399;ENST00000543770	0.899593	-0.152656	0.0424462	0.118744	down	no
MSTRG.107850	KIR3DL3;KIR2DL1	ENST00000291860;ENST00000291633	0.0558885	-4.1613	0.0424812	0.118804	down	no
MSTRG.139060	DPH3	ENST00000383775;ENST00000488423	0.730519	-0.453006	0.0424888	0.118811	down	no
MSTRG.40883	IFITM5	ENST00000382614	4.71426	2.23703	0.0424978	0.118828	up	no
MSTRG.91163	FAM83G	ENST00000388995;ENST00000580115;ENST00000345041	0.786977	-0.345607	0.0425444	0.11893	down	no
MSTRG.67302	DCT	ENST00000377028;ENST00000446125	0.620346	-0.688855	0.0426258	0.119044	down	no
MSTRG.111152	CEBPZ	ENST00000446769;ENST00000234170	0.722768	-0.468396	0.0426335	0.119044	down	no
MSTRG.90086	XAF1	ENST00000361842;ENST00000574907;ENST00000574394;ENST00000346752	2.10337	1.0727	0.0426385	0.119049	up	no
MSTRG.84302	UMOD	ENST00000396134;ENST00000570689	0.00776478	-7.00884	0.0427384	0.119255	down	no
MSTRG.88203	GABARAPL2	ENST00000037243;ENST00000568455;ENST00000563744;ENST00000565057	0.675596	-0.565767	0.042758	0.119281	down	no
MSTRG.110854	SLC30A6	ENST00000379343;ENST00000435660;ENST00000282587	0.758463	-0.398849	0.0428244	0.119396	down	no
MSTRG.55167	DNAJC22	ENST00000395069;ENST00000549441	0.791944	-0.33653	0.0429163	0.119502	down	no
MSTRG.200842	SYPL1	ENST00000011473;ENST00000455385;ENST00000464029;ENST00000470347	0.603898	-0.727624	0.0429445	0.119502	down	no
MSTRG.189148	MAN1A1	ENST00000368468	0.877705	-0.188192	0.043049	0.119502	down	no
MSTRG.162858	USP38	ENST00000307017;ENST00000510377	0.659385	-0.600807	0.0430497	0.119502	down	no
ENSG00000166160	OPN1MW2	ENST00000369929	0.00299457	-8.38344	0.0430521	0.119502	down	no
ENSG00000136573	BLK	ENST00000259089;ENST00000645242	6.69869	2.74388	0.0431413	0.119502	up	no
MSTRG.174127	REEP5	ENST00000379638;ENST00000513339;ENST00000504247;ENST00000261482	0.772065	-0.373206	0.0431529	0.119502	down	no
MSTRG.12401	INTS11	ENST00000419704;ENST00000429572;ENST00000498476;ENST00000526332;ENST00000435064;ENST00000545578;ENST00000421495;ENST00000530031;ENST00000534345;ENST00000540437	1.60606	0.683529	0.0431722	0.119502	up	no
MSTRG.144181	PROS1	ENST00000348974;ENST00000647936;ENST00000472684;ENST00000394236;ENST00000648853;ENST00000650591	0.681715	-0.552759	0.0431735	0.119502	down	no
MSTRG.35092	PCDH15	ENST00000617051;ENST00000644397;ENST00000613346;ENST00000458638	0.289835	-1.7867	0.0431819	0.119502	down	no
MSTRG.20042	CDC7	ENST00000428239;ENST00000234626	0.624253	-0.679798	0.0433019	0.119502	down	no
MSTRG.182022	ATAT1	ENST00000319027;ENST00000318999;ENST00000330083;ENST00000376485;ENST00000376483;ENST00000329992	1.62901	0.703993	0.0433467	0.119502	up	no
MSTRG.123576	FASTKD2	ENST00000402774;ENST00000236980;ENST00000403094	0.804305	-0.314185	0.0433736	0.119502	down	no
MSTRG.34325	RET	ENST00000355710;ENST00000340058;ENST00000638465;ENST00000640619	0.713	-0.488026	0.0433964	0.119502	down	no
MSTRG.146795	ACAD9	ENST00000514336;ENST00000308982	1.51955	0.603647	0.0433977	0.119502	up	no
MSTRG.149267	NMD3	ENST00000460469;ENST00000351193;ENST00000463518;ENST00000476237;ENST00000468606;ENST00000472947;ENST00000493066	0.669	-0.579923	0.0434099	0.119502	down	no
MSTRG.98706	RPRD1A	ENST00000399022;ENST00000588737;ENST00000590898;ENST00000357384;ENST00000585953	0.784234	-0.350644	0.0434158	0.119502	down	no
MSTRG.148583	AADACL2	ENST00000356517	3.41985	1.77393	0.0434673	0.119502	up	no
MSTRG.185257	SLC17A5	ENST00000355773	0.834235	-0.261474	0.0434728	0.119502	down	no
MSTRG.103212	CDC37	ENST00000593124;ENST00000589331;ENST00000222005;ENST00000589625	1.78108	0.83275	0.0434792	0.119502	up	no
MSTRG.177674	HAVCR1	ENST00000339252;ENST00000522693	0.336357	-1.57194	0.0434799	0.119502	down	no
MSTRG.19631	HS2ST1;AC093155	ENST00000370550;ENST00000370548;ENST00000370551;ENST00000591456	0.734306	-0.445546	0.0434802	0.119502	down	no
MSTRG.196987	SPATA48	ENST00000297001	0.00374883	-8.05934	0.0435204	0.119502	down	no
MSTRG.151879	NCBP2AS2	ENST00000602845	0.773333	-0.370839	0.0435376	0.119502	down	no
MSTRG.116077	RGPD3	ENST00000409886;ENST00000304514	0.793613	-0.333492	0.0435432	0.119502	down	no
ENSG00000125823	CSTL1	ENST00000347397	0.00268591	-8.54038	0.0436397	0.119502	down	no
MSTRG.222194	CYLC2	ENST00000374798	0.00553655	-7.4968	0.0436397	0.119502	down	no
MSTRG.182653	TMEM217	ENST00000652639;ENST00000651039;ENST00000357219	0.687964	-0.539594	0.0436957	0.119624	down	no
MSTRG.200342	TRIM4;OR2AE1	ENST00000355947;ENST00000354241;ENST00000349062;ENST00000316368	0.719574	-0.474786	0.0437061	0.119644	down	no
MSTRG.224459	RAPGEF1	ENST00000419442;ENST00000438647;ENST00000372189;ENST00000372190	1.77596	0.828603	0.043857	0.119931	up	no
MSTRG.199398	ZNF804B	ENST00000333190	0.0118561	-6.39822	0.0438769	0.119966	down	no
MSTRG.88201	TMEM231;CHST5;ADAT1	ENST00000615437;ENST00000336257;ENST00000258173;ENST00000564657;ENST00000565039;ENST00000307921;ENST00000568377	0.911849	-0.133134	0.0439287	0.12	down	no
MSTRG.21577	SLC16A4	ENST00000472422;ENST00000541986;ENST00000369779;ENST00000369781;ENST00000467986;ENST00000437429	0.958382	-0.0613271	0.0439394	0.12	down	no
MSTRG.136500	C22orf23	ENST00000403305;ENST00000422191;ENST00000249079	1.8557	0.89196	0.0439626	0.12	up	no
MSTRG.214547	TATDN1	ENST00000605953;ENST00000517678;ENST00000630259;ENST00000523888;ENST00000276692;ENST00000522810;ENST00000519232	0.939947	-0.0893484	0.0439719	0.120014	down	no
MSTRG.13449	SLC25A34	ENST00000294454	1.73703	0.79662	0.0440187	0.120068	up	no
MSTRG.49450	PPP2R1B	ENST00000531373;ENST00000341980;ENST00000393055;ENST00000531890;ENST00000311129;ENST00000527614	0.956137	-0.0647113	0.0440707	0.120177	down	no
ENSG00000205097	FRG2	ENST00000504750;ENST00000378763	0.015369	-6.02384	0.0441672	0.120372	down	no
MSTRG.197552	PHKG1;CHCHD2	ENST00000452681;ENST00000395422;ENST00000432123;ENST00000297373	0.980074	-0.0290373	0.0441838	0.120404	down	no
MSTRG.31017	ZNF669	ENST00000343381;ENST00000448299;ENST00000366500;ENST00000476158	0.841691	-0.248637	0.0442242	0.120482	down	no
MSTRG.59538	CHPT1	ENST00000229266;ENST00000549872	0.772243	-0.372874	0.0442477	0.120526	down	no
MSTRG.217508	IFNA8	ENST00000380205	0.0918342	-3.44482	0.0442524	0.120532	down	no
MSTRG.107217	PPP1R15A	ENST00000600406;ENST00000200453	1.86843	0.901828	0.0442643	0.120554	up	no
MSTRG.89986	C1QBP;DHX33	ENST00000225698;ENST00000225296;ENST00000576122;ENST00000570805;ENST00000574444;ENST00000433302;ENST00000572490	0.928474	-0.107067	0.0442747	0.120569	down	no
MSTRG.29051	HHIPL2	ENST00000343410	1.63161	0.706294	0.0442762	0.120572	up	no
MSTRG.8184	FAM199X	ENST00000493442	0.745513	-0.423695	0.0442811	0.120584	down	no
MSTRG.128247	ACSS1	ENST00000376726;ENST00000537502;ENST00000432802;ENST00000323482	1.76078	0.816214	0.0442902	0.120602	up	no
MSTRG.116301	SEPTIN10	ENST00000423520;ENST00000397712;ENST00000411469;ENST00000442746;ENST00000461295;ENST00000397714;ENST00000493445;ENST00000437928;ENST00000415095	0.841824	-0.248409	0.0443008	0.12062	down	no
MSTRG.140569	PLCD1	ENST00000463876;ENST00000334661	1.67017	0.739992	0.0443152	0.120639	up	no
MSTRG.70014	NUBPL	ENST00000551314;ENST00000281081;ENST00000550005;ENST00000550649	0.954254	-0.0675548	0.0443193	0.120645	down	no
MSTRG.54070	ALG10	ENST00000266483;ENST00000538927	0.652908	-0.615049	0.0443202	0.120646	down	no
MSTRG.199918	CASD1	ENST00000297273;ENST00000447923	0.715187	-0.483608	0.0443312	0.120669	down	no
MSTRG.43396	MPPED2	ENST00000448418;ENST00000358117	0.632691	-0.660427	0.0443516	0.120713	down	no
MSTRG.15481	SNIP1	ENST00000296215	0.979294	-0.0301857	0.0443629	0.120732	down	no
MSTRG.135296	SNRPD3;GGT1	ENST00000215829;ENST00000456869;ENST00000419133;ENST00000451366;ENST00000412658;ENST00000400382;ENST00000400380;ENST00000428855;ENST00000445029;ENST00000411974;ENST00000447416;ENST00000403838;ENST00000432867;ENST00000404223;ENST00000401885;ENST00000452551;ENST00000438643;ENST00000402849;ENST00000430289	0.868503	-0.203397	0.0443681	0.120739	down	no
MSTRG.27238	CSRP1	ENST00000532460;ENST00000340006;ENST00000533432;ENST00000367306	0.729862	-0.454304	0.044417	0.120844	down	no
MSTRG.103319	RGL3;EPOR	ENST00000393423;ENST00000567431;ENST00000592375;ENST00000567080;ENST00000380456;ENST00000222139	1.60537	0.682904	0.0444185	0.120844	up	no
MSTRG.221146	GADD45G	ENST00000375769;ENST00000252506	2.69174	1.42854	0.0444326	0.12087	up	no
MSTRG.222321	NIPSNAP3A	ENST00000374767	0.526954	-0.924251	0.0444975	0.120982	down	no
MSTRG.163760	RBM46	ENST00000510397	0.170916	-2.54864	0.0445008	0.120982	down	no
MSTRG.196439	STK17A	ENST00000319357	0.874461	-0.193535	0.0445186	0.120982	down	no
MSTRG.47834	CTSC	ENST00000524463;ENST00000227266;ENST00000529974;ENST00000527018;ENST00000528020	0.516731	-0.952514	0.0445352	0.120982	down	no
MSTRG.10471	GPC4	ENST00000370828	3.08591	1.6257	0.0445403	0.120982	up	no
MSTRG.72488	JKAMP	ENST00000616435;ENST00000356057;ENST00000554271;ENST00000556985;ENST00000425728	0.746327	-0.422121	0.0445481	0.120982	down	no
MSTRG.90136	ELP5	ENST00000396627;ENST00000574841;ENST00000356683;ENST00000573657;ENST00000576496;ENST00000396628;ENST00000570322;ENST00000574993;ENST00000573513;ENST00000570500;ENST00000354429;ENST00000574255;ENST00000572104	0.744984	-0.42472	0.0445727	0.120982	down	no
MSTRG.105876	ZNF570	ENST00000330173;ENST00000589725	0.900665	-0.150938	0.0445941	0.120982	down	no
MSTRG.94885	ACE	ENST00000290863;ENST00000290866;ENST00000579409;ENST00000428043;ENST00000582627	2.57756	1.36601	0.0446157	0.120982	up	no
MSTRG.37151	GHITM	ENST00000372134	0.651149	-0.61894	0.0446288	0.120982	down	no
MSTRG.212714	KLF10	ENST00000285407;ENST00000395884	0.734652	-0.444867	0.0446763	0.120982	down	no
MSTRG.102674	TINCR	ENST00000448587;ENST00000646160;ENST00000587632	0.562415	-0.830293	0.0446931	0.120982	down	no
MSTRG.35791	REEP3	ENST00000373758	0.85779	-0.221303	0.0447061	0.120982	down	no
MSTRG.202089	ASB15	ENST00000451215;ENST00000451558;ENST00000434204	0.273348	-1.87119	0.0447288	0.120982	down	no
MSTRG.129382	EMILIN3	ENST00000332312	0.636192	-0.652465	0.0448859	0.120982	down	no
MSTRG.62963	B3GLCT	ENST00000343307	0.746152	-0.422458	0.0449163	0.120982	down	no
MSTRG.60941	TRIAP1	ENST00000546954	0.70952	-0.495084	0.0449422	0.120982	down	no
MSTRG.59503	SCYL2	ENST00000635101;ENST00000360820;ENST00000549687	0.80662	-0.310038	0.0449514	0.120982	down	no
MSTRG.136781	ST13	ENST00000216218	0.699918	-0.514742	0.0449764	0.120982	down	no
MSTRG.155500	GABRA2	ENST00000507460;ENST00000381620;ENST00000515082	0.171987	-2.53963	0.0449847	0.120982	down	no
MSTRG.60929	RPLP0	ENST00000550856;ENST00000228306;ENST00000552292;ENST00000547211;ENST00000551150;ENST00000547191;ENST00000546989;ENST00000392514;ENST00000550423;ENST00000313104	0.617856	-0.694657	0.0450246	0.120982	down	no
MSTRG.24861	NME7	ENST00000367811;ENST00000472647	0.787336	-0.344949	0.0450523	0.120982	down	no
MSTRG.142727	EOGT	ENST00000456376;ENST00000424374;ENST00000615922;ENST00000540764;ENST00000383701	0.953108	-0.0692883	0.0450849	0.120982	down	no
MSTRG.79778	SPG21	ENST00000433215;ENST00000204566;ENST00000559199;ENST00000557795;ENST00000558765;ENST00000558943;ENST00000416889;ENST00000560878;ENST00000559677	0.92868	-0.106747	0.0451202	0.120982	down	no
MSTRG.13616	PADI3	ENST00000375460	0.00775675	-7.01033	0.045129	0.120982	down	no
ENSG00000196570	PFN3	ENST00000358571	0.0014142	-9.46579	0.0451387	0.120982	down	no
MSTRG.178741	NPM1	ENST00000296930;ENST00000521672;ENST00000393820;ENST00000351986;ENST00000517671	0.725552	-0.462849	0.0451628	0.121027	down	no
MSTRG.109838	MATN3	ENST00000407540;ENST00000421259	0.476807	-1.06852	0.0451933	0.121083	down	no
MSTRG.224499	POMT1	ENST00000423007;ENST00000402686;ENST00000404875;ENST00000415075;ENST00000372220;ENST00000430619;ENST00000341012;ENST00000441334;ENST00000448212;ENST00000372228	1.39186	0.477012	0.045211	0.121117	up	no
MSTRG.159553	LAMTOR3	ENST00000499666	0.671319	-0.57493	0.0452864	0.12126	down	no
MSTRG.190668	HECA	ENST00000367658	0.808116	-0.307366	0.0452867	0.12126	down	no
MSTRG.79132	CCPG1;DNAAF4	ENST00000564663;ENST00000310958;ENST00000448430;ENST00000564092;ENST00000425574;ENST00000563171;ENST00000568543;ENST00000570272;ENST00000568592;ENST00000569205;ENST00000321149;ENST00000442196	0.67469	-0.567704	0.0452931	0.121272	down	no
MSTRG.158517	KLHL8	ENST00000273963;ENST00000498875;ENST00000512111;ENST00000425278	0.936197	-0.0951156	0.045332	0.12133	down	no
MSTRG.56712	LEMD3	ENST00000308330	0.753638	-0.408056	0.0453435	0.121356	down	no
MSTRG.29551	RHOU	ENST00000366691	0.663066	-0.592775	0.0453709	0.121417	down	no
MSTRG.194598	MACC1	ENST00000400331;ENST00000589011	0.761926	-0.392278	0.0454549	0.121515	down	no
MSTRG.223086	ZNF618	ENST00000452710;ENST00000288466;ENST00000615615;ENST00000374126;ENST00000374124	1.66527	0.735758	0.0454683	0.121548	up	no
MSTRG.64491	WDFY2	ENST00000298125;ENST00000612477	1.54773	0.630153	0.0454724	0.121555	up	no
MSTRG.90275	SLC25A35	ENST00000579192;ENST00000577745;ENST00000380067	2.03024	1.02165	0.0454813	0.121568	up	no
MSTRG.32884	BMI1;COMMD3;COMMD3-BMI1	ENST00000376663;ENST00000471350;ENST00000444869;ENST00000416820;ENST00000442508;ENST00000376836;ENST00000602390	0.715168	-0.483646	0.0457474	0.122032	down	no
MSTRG.177006	SPINK5	ENST00000359874;ENST00000521206	0.421579	-1.24613	0.0457654	0.122051	down	no
MSTRG.177498	FAM114A2	ENST00000351797;ENST00000519808;ENST00000522634;ENST00000517605;ENST00000523705;ENST00000522858;ENST00000524246	0.771117	-0.374978	0.0458644	0.122151	down	no
MSTRG.16340	DMBX1	ENST00000360032;ENST00000371956	0.0397893	-4.65147	0.0458683	0.122156	down	no
MSTRG.60977	UNC119B	ENST00000344651	0.640102	-0.643627	0.0458921	0.122198	down	no
MSTRG.119493	RIF1	ENST00000414861;ENST00000430328;ENST00000243326;ENST00000428287;ENST00000453091;ENST00000444746	0.91864	-0.122429	0.0458953	0.122203	down	no
MSTRG.160102	ARHGEF38	ENST00000420470	0.494957	-1.01462	0.0459833	0.122372	down	no
MSTRG.59873	ALDH1L2	ENST00000652515;ENST00000548418;ENST00000258494	1.85457	0.891087	0.0460326	0.122466	up	no
MSTRG.134401	C21orf58	ENST00000397682;ENST00000397680;ENST00000397683;ENST00000397679;ENST00000291691;ENST00000445935	1.7385	0.79784	0.0460572	0.12251	up	no
MSTRG.113899	BOLA3;MOB1A	ENST00000327428;ENST00000396049;ENST00000295326	0.728652	-0.456699	0.0460638	0.122521	down	no
MSTRG.17330	DAB1;OMA1	ENST00000371236;ENST00000456980;ENST00000482274;ENST00000371226;ENST00000419242;ENST00000420954;ENST00000421528	0.864719	-0.209697	0.0461497	0.122681	down	no
MSTRG.112683	PNPT1	ENST00000447944	0.894681	-0.160554	0.0461916	0.122714	down	no
MSTRG.45025	CLP1	ENST00000529430;ENST00000533682;ENST00000529773;ENST00000533905;ENST00000525602	0.936905	-0.0940252	0.0461974	0.122716	down	no
MSTRG.41101	TSPAN32	ENST00000182290;ENST00000381117;ENST00000612299;ENST00000451520	1.85833	0.894009	0.0462342	0.122716	up	no
MSTRG.215972	SLC39A4	ENST00000276833;ENST00000301305	0.756766	-0.402081	0.0462351	0.122716	down	no
MSTRG.83741	GSPT1	ENST00000434724;ENST00000420576;ENST00000439887;ENST00000563468;ENST00000568849	0.9732	-0.0391919	0.0462357	0.122716	down	no
MSTRG.214536	TRMT12	ENST00000328599	0.912128	-0.132692	0.0462438	0.122716	down	no
MSTRG.12511	TNFRSF14	ENST00000435221;ENST00000409119;ENST00000434817;ENST00000355716;ENST00000482602;ENST00000451778	1.84754	0.885607	0.0462654	0.122716	up	no
MSTRG.128733	BPIFB3	ENST00000375494	0.00373808	-8.06349	0.046277	0.122716	down	no
MSTRG.93455	CRHR1;LINC02210-CRHR1	ENST00000314537;ENST00000619154;ENST00000293493;ENST00000634540;ENST00000339069	0.860651	-0.2165	0.0462796	0.122716	down	no
MSTRG.110342	SELENOI	ENST00000613142;ENST00000260585	0.693882	-0.527237	0.0462947	0.122716	down	no
MSTRG.130127	KCNG1	ENST00000433903;ENST00000447736;ENST00000439216;ENST00000371571;ENST00000424171	0.657511	-0.604914	0.0462962	0.122716	down	no
MSTRG.7896	TSPAN6	ENST00000373020;ENST00000612152;ENST00000614008	0.467134	-1.09809	0.0463331	0.122716	down	no
ENSG00000221931	OR6X1	ENST00000327930	0.0964857	-3.37354	0.0463337	0.122716	down	no
MSTRG.14041	EPHA8	ENST00000166244	0.113894	-3.13423	0.04644	0.122716	down	no
MSTRG.124604	TUBA4A	ENST00000248437;ENST00000392088;ENST00000427737;ENST00000447205;ENST00000456818;ENST00000425551	0.661752	-0.595638	0.0464628	0.122716	down	no
MSTRG.15512	C1orf122	ENST00000373042;ENST00000373043;ENST00000468084	0.775842	-0.366165	0.0465098	0.122716	down	no
MSTRG.212428	ANKRD46	ENST00000519597;ENST00000520311;ENST00000521345;ENST00000335659;ENST00000519316;ENST00000523000;ENST00000358990;ENST00000520552	0.685833	-0.54407	0.0466553	0.122716	down	no
MSTRG.11199	SPANXN4	ENST00000446864	0.00165262	-9.24103	0.0467282	0.122716	down	no
MSTRG.12384	AURKAIP1	ENST00000378853;ENST00000338370;ENST00000321751;ENST00000338338	0.7504	-0.414268	0.0467505	0.122754	down	no
MSTRG.192119	MAS1	ENST00000252660;ENST00000674077	0.244056	-2.03472	0.0467967	0.122768	down	no
MSTRG.207286	NRG1;AC083977	ENST00000651335;ENST00000520407;ENST00000652698;ENST00000519301;ENST00000523534;ENST00000651333;ENST00000356819;ENST00000652575;ENST00000650819;ENST00000539990;ENST00000520502;ENST00000652588;ENST00000522569	0.495139	-1.01409	0.0469037	0.122978	down	no
MSTRG.83556	USP7	ENST00000344836;ENST00000563085;ENST00000566273;ENST00000673704;ENST00000564117;ENST00000569230	1.07732	0.107448	0.0469504	0.122992	up	no
MSTRG.132126	CHODL	ENST00000299295;ENST00000400127;ENST00000400128;ENST00000543733	0.403711	-1.3086	0.046986	0.122998	down	no
MSTRG.200602	ARMC10	ENST00000428183;ENST00000454559;ENST00000441711;ENST00000323716;ENST00000431642;ENST00000541300;ENST00000425331;ENST00000434153	0.745225	-0.424253	0.0469912	0.122998	down	no
MSTRG.13893	CAPZB	ENST00000375144;ENST00000264202;ENST00000264203;ENST00000375142;ENST00000433834;ENST00000674432;ENST00000674278	1.72283	0.784784	0.0469955	0.122998	up	no
MSTRG.102358	TLE6	ENST00000482627;ENST00000246112;ENST00000453329	0.754411	-0.406577	0.0469991	0.122998	down	no
MSTRG.23334	PGLYRP3	ENST00000290722	0.00292356	-8.41806	0.0470372	0.123014	down	no
MSTRG.107001	SLC1A5	ENST00000542575;ENST00000412532;ENST00000594991;ENST00000434726	0.736822	-0.440612	0.0470538	0.123049	down	no
MSTRG.208151	IKBKB	ENST00000649612;ENST00000518983	1.56113	0.642595	0.0470678	0.123083	up	no
MSTRG.19827	GBP7;GBP2	ENST00000294671;ENST00000370466	0.722145	-0.46964	0.0471112	0.123166	down	no
ENSG00000279782	PPIAL4F	ENST00000581138	0.354387	-1.4966	0.047113	0.123169	down	no
MSTRG.156319	PAICS	ENST00000264221;ENST00000514888;ENST00000399688;ENST00000512576;ENST00000505164	0.752661	-0.409928	0.0471151	0.123173	down	no
MSTRG.99406	SETBP1	ENST00000591940;ENST00000426838;ENST00000645568;ENST00000649279	1.57107	0.651745	0.0471396	0.123224	up	no
MSTRG.32927	PTF1A	ENST00000376504	0.00390432	-8.00071	0.0471443	0.123227	down	no
MSTRG.170923	SLC30A5	ENST00000511158;ENST00000396591;ENST00000621204;ENST00000380860;ENST00000502979;ENST00000504103	0.785076	-0.349095	0.0472267	0.123372	down	no
MSTRG.47801	RAB38	ENST00000243662;ENST00000526372	0.567067	-0.818409	0.047257	0.123429	down	no
MSTRG.220587	SPATA31D3	ENST00000445385	0.0411248	-4.60385	0.0472669	0.12344	down	no
MSTRG.29527	H2AW	ENST00000366695	0.532961	-0.907897	0.04734	0.123585	down	no
MSTRG.92013	RAB11FIP4	ENST00000621161;ENST00000394744	0.701905	-0.510652	0.047357	0.123607	down	no
MSTRG.162660	ZNF330	ENST00000262990;ENST00000503649;ENST00000512809;ENST00000512738	0.827811	-0.272626	0.047361	0.123609	down	no
MSTRG.128966	SCAND1	ENST00000615116;ENST00000373991;ENST00000305978	0.787069	-0.345439	0.0474123	0.123704	down	no
MSTRG.199439	SRI	ENST00000265729;ENST00000431660;ENST00000490437	0.671165	-0.575261	0.0474971	0.123855	down	no
MSTRG.55254	TMBIM6	ENST00000267115;ENST00000548713;ENST00000548894;ENST00000547832;ENST00000549130;ENST00000547798;ENST00000546796;ENST00000423828;ENST00000550445;ENST00000549966;ENST00000552370;ENST00000548201;ENST00000547187;ENST00000549385;ENST00000548809;ENST00000546914;ENST00000550951;ENST00000549445;ENST00000395006;ENST00000552699	0.788111	-0.343529	0.0475051	0.123865	down	no
MSTRG.1749	MBTPS2;YY2	ENST00000379484;ENST00000429584;ENST00000365779	0.706848	-0.500528	0.047543	0.123938	down	no
MSTRG.6371	COX7B	ENST00000373335;ENST00000650309;ENST00000647835;ENST00000475465	0.871151	-0.199005	0.047547	0.123944	down	no
MSTRG.76668	GABRG3	ENST00000615808;ENST00000333743;ENST00000557596;ENST00000554696	0.105459	-3.24525	0.0475521	0.123952	down	no
MSTRG.9016	RBMXL3	ENST00000424776	4.35661	2.12321	0.0475564	0.123957	up	no
MSTRG.12389	ANKRD65	ENST00000537107;ENST00000442470;ENST00000427211	0.714683	-0.484626	0.0475574	0.123957	down	no
MSTRG.54100	DNM1L	ENST00000358214;ENST00000414834;ENST00000549701;ENST00000553257;ENST00000266481;ENST00000452533;ENST00000547312;ENST00000381000	0.858288	-0.220467	0.0475795	0.123999	down	no
MSTRG.174850	SNCAIP	ENST00000514467;ENST00000261367;ENST00000508681;ENST00000506272;ENST00000261368;ENST00000509652;ENST00000514497;ENST00000509154	2.44051	1.28718	0.0475865	0.124015	up	no
MSTRG.2022	ACOT9	ENST00000336430;ENST00000492081;ENST00000379295;ENST00000379303	0.939727	-0.0896858	0.0476398	0.124106	down	no
MSTRG.94683	PPM1D	ENST00000629650;ENST00000305921;ENST00000590418	0.951054	-0.0724011	0.0476409	0.124107	down	no
MSTRG.200058	SDHAF3	ENST00000432641;ENST00000360382	0.67909	-0.558325	0.0476665	0.124158	down	no
MSTRG.102311	PEAK3	ENST00000342063	0.71987	-0.474191	0.0476887	0.124209	down	no
MSTRG.29194	DEGS1	ENST00000415210;ENST00000323699	0.809682	-0.304573	0.0476983	0.124228	down	no
MSTRG.182631	MTCH1	ENST00000418541;ENST00000460219;ENST00000373616;ENST00000373627	0.786461	-0.346553	0.0477798	0.124277	down	no
MSTRG.141797	CHDH	ENST00000315251;ENST00000467802;ENST00000481668	0.6417	-0.640029	0.0479193	0.124495	down	no
MSTRG.78023	PLA2G4E	ENST00000399518	0.201185	-2.31341	0.0479301	0.124518	down	no
MSTRG.3336	CASK	ENST00000378168;ENST00000642361;ENST00000421587;ENST00000645986;ENST00000378179;ENST00000442742;ENST00000643831;ENST00000644219;ENST00000646087;ENST00000486402;ENST00000378158;ENST00000644770;ENST00000644347;ENST00000643733	0.952058	-0.0708782	0.0479537	0.12454	down	no
MSTRG.113587	FBXO48	ENST00000377957	0.870335	-0.200357	0.0479577	0.124547	down	no
MSTRG.145985	ARHGAP31	ENST00000482743;ENST00000264245	1.64429	0.717468	0.0480704	0.124681	up	no
ENSG00000283093	CENPVL2	ENST00000634648	0.00380379	-8.03835	0.0480786	0.124681	down	no
ENSG00000286135	AL603764	ENST00000652090	0.00209246	-8.90058	0.0481278	0.124681	down	no
MSTRG.139064	RFTN1	ENST00000441460;ENST00000432519;ENST00000334133;ENST00000451036;ENST00000431547;ENST00000449415	1.99693	0.997783	0.0481558	0.124681	up	no
MSTRG.125216	AGFG1	ENST00000409979;ENST00000310078;ENST00000458212;ENST00000456594;ENST00000409171	0.791794	-0.336804	0.0481754	0.124681	down	no
ENSG00000180708	OR10K2	ENST00000314902	0.0423399	-4.56184	0.048227	0.124681	down	no
MSTRG.80242	UACA	ENST00000539319;ENST00000322954;ENST00000379983;ENST00000558758	1.63774	0.711703	0.0482422	0.124681	up	no
MSTRG.107116	ZSWIM9	ENST00000614654	0.823998	-0.279288	0.0482451	0.124681	down	no
MSTRG.84613	NPIPB5	ENST00000424340;ENST00000536620;ENST00000415833;ENST00000357370;ENST00000517539;ENST00000541154;ENST00000621622;ENST00000538606;ENST00000528249;ENST00000356156;ENST00000543407	1.55001	0.632282	0.0482622	0.124681	up	no
MSTRG.110688	LCLAT1	ENST00000319406;ENST00000466477;ENST00000309052;ENST00000465538;ENST00000465200;ENST00000379509;ENST00000476535;ENST00000476038;ENST00000497423;ENST00000488144	0.88656	-0.17371	0.0483769	0.124681	down	no
MSTRG.105863	ZNF569	ENST00000448051;ENST00000591710;ENST00000589833;ENST00000392149;ENST00000316950;ENST00000592490;ENST00000392150	0.838432	-0.254234	0.048393	0.124681	down	no
MSTRG.138490	SETD5	ENST00000406341;ENST00000399686;ENST00000407969;ENST00000468208;ENST00000402198;ENST00000421188	1.44029	0.526361	0.0484106	0.124681	up	no
ENSG00000164600	NEUROD6	ENST00000297142	0.00521673	-7.58264	0.0484163	0.124681	down	no
MSTRG.8170	H2BW2	ENST00000675318	0.00523272	-7.57822	0.0484163	0.124681	down	no
MSTRG.166252	CCDC127	ENST00000296824;ENST00000441693	0.944735	-0.0820179	0.0484504	0.124743	down	no
MSTRG.79950	MAP2K1	ENST00000566326;ENST00000307102	0.893422	-0.162587	0.0484585	0.124759	down	no
MSTRG.16596	AGBL4	ENST00000416121;ENST00000371839;ENST00000371836	0.478275	-1.06409	0.0484907	0.124826	down	no
MSTRG.63564	KBTBD6	ENST00000379485	0.799317	-0.323161	0.0485032	0.124848	down	no
MSTRG.172757	LYSMD3	ENST00000509384;ENST00000315948;ENST00000500869	0.682753	-0.550565	0.0485452	0.12487	down	no
ENSG00000223591	CENPVL1	ENST00000602548	0.00393329	-7.99005	0.0485479	0.12487	down	no
MSTRG.78553	SLC24A5	ENST00000482911;ENST00000341459	0.0424548	-4.55793	0.0485712	0.124892	down	no
MSTRG.199054	SEMA3E	ENST00000642232;ENST00000643230;ENST00000427262	0.606271	-0.721965	0.0486027	0.124941	down	no
MSTRG.221232	SEMA4D	ENST00000420681;ENST00000356444;ENST00000438547;ENST00000540475;ENST00000420101;ENST00000450295;ENST00000433650;ENST00000420670;ENST00000455551;ENST00000420987;ENST00000422704;ENST00000339861	1.6018	0.67969	0.0486333	0.124997	up	no
MSTRG.75605	EVL	ENST00000557384;ENST00000555048;ENST00000557153;ENST00000544450;ENST00000392920;ENST00000402714	1.66424	0.734861	0.0486626	0.125049	up	no
MSTRG.52997	PLCZ1	ENST00000648272	0.215807	-2.21219	0.0486859	0.125093	down	no
MSTRG.103485	ZNF564;ZNF709;ZNF490;ZNF799;ZNF443	ENST00000596193;ENST00000397732;ENST00000311437;ENST00000440366;ENST00000416136;ENST00000595766;ENST00000301547;ENST00000419318;ENST00000339282;ENST00000430385	1.01769	0.025303	0.048708	0.125128	up	no
MSTRG.97168	NAPG	ENST00000322897;ENST00000582472	0.69094	-0.533368	0.0487086	0.125128	down	no
MSTRG.89601	YWHAE	ENST00000264335;ENST00000575977;ENST00000573026;ENST00000496706;ENST00000571732	1.02856	0.0406213	0.0487099	0.125129	up	no
MSTRG.83972	NDE1	ENST00000674581;ENST00000674995;ENST00000577101;ENST00000572756;ENST00000576502;ENST00000573694;ENST00000572967;ENST00000574109;ENST00000396355;ENST00000396354	1.60342	0.681152	0.04872	0.125148	up	no
MSTRG.181503	HFE	ENST00000357618;ENST00000461397;ENST00000349999;ENST00000317896;ENST00000488199;ENST00000352392;ENST00000397022;ENST00000309234;ENST00000470149;ENST00000485729;ENST00000353147	0.850968	-0.232823	0.0487698	0.125231	down	no
MSTRG.65979	KLF5	ENST00000377687	0.855893	-0.224497	0.0488196	0.125315	down	no
MSTRG.134853	MED15	ENST00000414658;ENST00000406969;ENST00000451058;ENST00000432052;ENST00000445189;ENST00000445987;ENST00000424287;ENST00000382974;ENST00000423862;ENST00000263205;ENST00000292733;ENST00000428629;ENST00000457322	1.5179	0.602073	0.048837	0.125318	up	no
MSTRG.157055	CENPC	ENST00000273853	0.842099	-0.247938	0.0488524	0.125318	down	no
MSTRG.69406	PABPN1;BCL2L2	ENST00000216727;ENST00000557236;ENST00000556821;ENST00000397276;ENST00000553824;ENST00000557702;ENST00000554635;ENST00000250405;ENST00000557579	1.45135	0.537395	0.0488639	0.125318	up	no
MSTRG.97849	IMPACT	ENST00000648078;ENST00000284202	0.672002	-0.573462	0.0488788	0.125338	down	no
MSTRG.126708	PRNP	ENST00000424424;ENST00000457586;ENST00000379440;ENST00000430350	0.621832	-0.685402	0.0488808	0.125339	down	no
MSTRG.182250	C4B;STK19;C4A	ENST00000435363;ENST00000375333;ENST00000428956;ENST00000375331;ENST00000460018	0.659665	-0.600196	0.0491452	0.125855	down	no
ENSG00000258817	OR4C13	ENST00000555099	0.00270986	-8.52757	0.0491996	0.125928	down	no
MSTRG.44570	LRP4	ENST00000378623;ENST00000534404	2.01491	1.01072	0.0492696	0.126056	up	no
MSTRG.150773	ABCC5	ENST00000427120;ENST00000437341;ENST00000392579;ENST00000265586;ENST00000334444;ENST00000382494;ENST00000446941	1.75996	0.815543	0.0492817	0.126076	up	no
MSTRG.79728	ZNF609;TRIP4	ENST00000326648;ENST00000416172;ENST00000261884;ENST00000558162	1.42248	0.508413	0.0492982	0.126101	up	no
[truncated: 15,225 more rows]
