# Supplementary material for: Whole-Transcriptome Sequencing of Knee Joint Cartilage from Kashin–Beck Disease and Osteoarthritis Patients
Source: Int J Mol Sci. 2024 Apr 15;25(8):4348. doi: 10.3390/ijms25084348 (PMC11049856; doi:10.3390/ijms25084348)
Supplement: Supplementary file 1 [file ijms-25-04348-s001.zip › Supplementary Table S2_KBDVSOA_GO_enrichment.xlsx]

## Sheet: Sheet1
Supplementary Table S2. GO enrichment analysis results of differentially expressed mRNA between KBD and OA
GO_ID	GO_Term	GO_function	GO_class	S gene number	TS gene number	B gene number	TB gene number	pvalue
GO:0030509	BMP signaling pathway	biological_process	10	5	42	81	16864	1.6695e-06
GO:0032332	positive regulation of chondrocyte differentiation	biological_process	8	2	42	19	16864	0.00100801
GO:0002076	osteoblast development	biological_process	6	2	42	19	16864	0.00100801
GO:0002063	chondrocyte development	biological_process	6	2	42	20	16864	0.00111824
GO:0001958	endochondral ossification	biological_process	6	2	42	28	16864	0.00219681
GO:0001503	ossification	biological_process	4	3	42	105	16864	0.00225714
GO:0001649	osteoblast differentiation	biological_process	6	3	42	107	16864	0.00238166
GO:0001899	negative regulation of cytolysis by symbiont of host cells	biological_process	9	1	42	1	16864	0.00249051
GO:1900125	regulation of hyaluronan biosynthetic process	biological_process	8	1	42	1	16864	0.00249051
GO:1990009	retinal cell apoptotic process	biological_process	7	1	42	1	16864	0.00249051
GO:2000691	negative regulation of cardiac muscle cell myoblast differentiation	biological_process	9	1	42	1	16864	0.00249051
GO:1904240	negative regulation of VCP-NPL4-UFD1 AAA ATPase complex assembly	biological_process	8	1	42	1	16864	0.00249051
GO:0061751	neutral sphingomyelin phosphodiesterase activity	molecular_function	9	1	42	1	16864	0.00249051
GO:0015774	polysaccharide transport	biological_process	8	1	42	1	16864	0.00249051
GO:0007189	adenylate cyclase-activating G protein-coupled receptor signaling pathway	biological_process	8	3	42	110	16864	0.00257632
GO:0048247	lymphocyte chemotaxis	biological_process	6	2	42	31	16864	0.00268968
GO:0031333	negative regulation of protein-containing complex assembly	biological_process	7	2	42	34	16864	0.00322967
GO:0030879	mammary gland development	biological_process	7	2	42	34	16864	0.00322967
GO:0048469	cell maturation	biological_process	5	2	42	37	16864	0.00381608
GO:0033872	[heparan sulfate]-glucosamine 3-sulfotransferase 3 activity	molecular_function	8	1	42	2	16864	0.00497497
GO:0003433	chondrocyte development involved in endochondral bone morphogenesis	biological_process	7	1	42	2	16864	0.00497497
GO:1905198	manchette assembly	biological_process	5	1	42	2	16864	0.00497497
GO:0004991	parathyroid hormone receptor activity	molecular_function	7	1	42	2	16864	0.00497497
GO:0034681	integrin alpha11-beta1 complex	cellular_component	6	1	42	2	16864	0.00497497
GO:0061153	trachea gland development	biological_process	7	1	42	2	16864	0.00497497
GO:0090520	sphingolipid mediated signaling pathway	biological_process	5	1	42	2	16864	0.00497497
GO:0021873	forebrain neuroblast division	biological_process	9	1	42	2	16864	0.00497497
GO:0051649	establishment of localization in cell	biological_process	5	1	42	2	16864	0.00497497
GO:2000536	negative regulation of entry of bacterium into host cell	biological_process	7	1	42	2	16864	0.00497497
GO:0002062	chondrocyte differentiation	biological_process	6	2	42	43	16864	0.00512544
GO:0010862	positive regulation of pathway-restricted SMAD protein phosphorylation	biological_process	11	2	42	44	16864	0.00536107
GO:0030282	bone mineralization	biological_process	7	2	42	45	16864	0.0056016
GO:0001501	skeletal system development	biological_process	6	3	42	150	16864	0.00614344
GO:0007204	positive regulation of cytosolic calcium ion concentration	biological_process	13	3	42	151	16864	0.00625721
GO:0005298	proline:sodium symporter activity	molecular_function	8	1	42	3	16864	0.00745339
GO:0140014	mitotic nuclear division	biological_process	8	1	42	3	16864	0.00745339
GO:1900126	negative regulation of hyaluronan biosynthetic process	biological_process	9	1	42	3	16864	0.00745339
GO:0097116	gephyrin clustering involved in postsynaptic density assembly	biological_process	7	1	42	3	16864	0.00745339
GO:0038064	collagen receptor activity	molecular_function	6	1	42	3	16864	0.00745339
GO:0071899	negative regulation of estrogen receptor binding	biological_process	6	1	42	3	16864	0.00745339
GO:0061643	chemorepulsion of axon	biological_process	7	1	42	3	16864	0.00745339
GO:1903070	negative regulation of ER-associated ubiquitin-dependent protein catabolic process	biological_process	13	1	42	3	16864	0.00745339
GO:0008284	positive regulation of cell population proliferation	biological_process	7	5	42	514	16864	0.00866124
GO:0060395	SMAD protein signal transduction	biological_process	5	2	42	57	16864	0.00886185
GO:0043621	protein self-association	molecular_function	5	2	42	59	16864	0.00947062
GO:0042475	odontogenesis of dentin-containing tooth	biological_process	7	2	42	60	16864	0.00978184
GO:0098868	bone growth	biological_process	5	1	42	4	16864	0.00992577
GO:0031630	regulation of synaptic vesicle fusion to presynaptic active zone membrane	biological_process	9	1	42	4	16864	0.00992577
GO:0071442	positive regulation of histone H3-K14 acetylation	biological_process	12	1	42	4	16864	0.00992577
GO:0060033	anatomical structure regression	biological_process	4	1	42	4	16864	0.00992577
GO:1903061	positive regulation of protein lipidation	biological_process	9	1	42	4	16864	0.00992577
GO:0030135	coated vesicle	cellular_component	7	1	42	4	16864	0.00992577
GO:0021943	formation of radial glial scaffolds	biological_process	8	1	42	4	16864	0.00992577
GO:1902842	negative regulation of netrin-activated signaling pathway	biological_process	9	1	42	4	16864	0.00992577
GO:0038065	collagen-activated signaling pathway	biological_process	6	1	42	4	16864	0.00992577
GO:0015820	leucine transport	biological_process	8	1	42	4	16864	0.00992577
GO:0030223	neutrophil differentiation	biological_process	9	1	42	4	16864	0.00992577
GO:0006684	sphingomyelin metabolic process	biological_process	8	1	42	4	16864	0.00992577
GO:0032983	kainate selective glutamate receptor complex	cellular_component	8	1	42	4	16864	0.00992577
GO:0071461	cellular response to redox state	biological_process	5	1	42	4	16864	0.00992577
GO:0097118	neuroligin clustering involved in postsynaptic membrane assembly	biological_process	7	1	42	4	16864	0.00992577
GO:0002051	osteoblast fate commitment	biological_process	6	1	42	4	16864	0.00992577
GO:0004309	exopolyphosphatase activity	molecular_function	8	1	42	5	16864	0.0123922
GO:0030072	peptide hormone secretion	biological_process	10	1	42	5	16864	0.0123922
GO:0060561	apoptotic process involved in morphogenesis	biological_process	8	1	42	5	16864	0.0123922
GO:0050974	detection of mechanical stimulus involved in sensory perception	biological_process	6	1	42	5	16864	0.0123922
GO:0031727	CCR2 chemokine receptor binding	molecular_function	9	1	42	5	16864	0.0123922
GO:0098639	collagen binding involved in cell-matrix adhesion	molecular_function	6	1	42	5	16864	0.0123922
GO:0004565	beta-galactosidase activity	molecular_function	8	1	42	5	16864	0.0123922
GO:0015277	kainate selective glutamate receptor activity	molecular_function	8	1	42	5	16864	0.0123922
GO:0033564	anterior/posterior axon guidance	biological_process	7	1	42	5	16864	0.0123922
GO:0071866	negative regulation of apoptotic process in bone marrow cell	biological_process	10	1	42	5	16864	0.0123922
GO:0033153	T cell receptor V(D)J recombination	biological_process	7	1	42	5	16864	0.0123922
GO:0097109	neuroligin family protein binding	molecular_function	6	1	42	5	16864	0.0123922
GO:0070695	FHF complex	cellular_component	4	1	42	5	16864	0.0123922
GO:0030284	estrogen receptor activity	molecular_function	6	1	42	5	16864	0.0123922
GO:1903825	organic acid transmembrane transport	biological_process	8	1	42	5	16864	0.0123922
GO:0061035	regulation of cartilage development	biological_process	7	1	42	5	16864	0.0123922
GO:1902262	apoptotic process involved in blood vessel morphogenesis	biological_process	9	1	42	5	16864	0.0123922
GO:0006798	polyphosphate catabolic process	biological_process	7	1	42	5	16864	0.0123922
GO:0070915	lysophosphatidic acid receptor activity	molecular_function	8	1	42	5	16864	0.0123922
GO:0032436	positive regulation of proteasomal ubiquitin-dependent protein catabolic process	biological_process	12	2	42	73	16864	0.0142307
GO:0071864	positive regulation of cell proliferation in bone marrow	biological_process	8	1	42	6	16864	0.0148525
GO:0045063	T-helper 1 cell differentiation	biological_process	13	1	42	6	16864	0.0148525
GO:0002685	regulation of leukocyte migration	biological_process	6	1	42	6	16864	0.0148525
GO:0097443	sorting endosome	cellular_component	8	1	42	6	16864	0.0148525
GO:0045843	negative regulation of striated muscle tissue development	biological_process	9	1	42	6	16864	0.0148525
GO:0030854	positive regulation of granulocyte differentiation	biological_process	10	1	42	6	16864	0.0148525
GO:0042297	vocal learning	biological_process	6	1	42	6	16864	0.0148525
GO:0023051	regulation of signaling	biological_process	5	1	42	6	16864	0.0148525
GO:0097187	dentinogenesis	biological_process	8	1	42	6	16864	0.0148525
GO:0097119	postsynaptic density protein 95 clustering	biological_process	8	1	42	6	16864	0.0148525
GO:0060603	mammary gland duct morphogenesis	biological_process	8	1	42	6	16864	0.0148525
GO:0070314	G1 to G0 transition	biological_process	5	1	42	6	16864	0.0148525
GO:0040036	regulation of fibroblast growth factor receptor signaling pathway	biological_process	8	1	42	6	16864	0.0148525
GO:0005125	cytokine activity	molecular_function	7	3	42	209	16864	0.0151059
GO:0032713	negative regulation of interleukin-4 production	biological_process	8	1	42	7	16864	0.0173069
GO:0042487	regulation of odontogenesis of dentin-containing tooth	biological_process	9	1	42	7	16864	0.0173069
GO:0046632	alpha-beta T cell differentiation	biological_process	9	1	42	7	16864	0.0173069
GO:0030868	smooth endoplasmic reticulum membrane	cellular_component	6	1	42	7	16864	0.0173069
GO:0032488	Cdc42 protein signal transduction	biological_process	9	1	42	7	16864	0.0173069
GO:0032696	negative regulation of interleukin-13 production	biological_process	8	1	42	7	16864	0.0173069
GO:0032714	negative regulation of interleukin-5 production	biological_process	8	1	42	7	16864	0.0173069
GO:0021861	forebrain radial glial cell differentiation	biological_process	8	1	42	7	16864	0.0173069
GO:0060710	chorio-allantoic fusion	biological_process	4	1	42	7	16864	0.0173069
GO:0071286	cellular response to magnesium ion	biological_process	8	1	42	7	16864	0.0173069
GO:0030130	clathrin coat of trans-Golgi network vesicle	cellular_component	9	1	42	7	16864	0.0173069
GO:0032051	clathrin light chain binding	molecular_function	6	1	42	7	16864	0.0173069
GO:0060541	respiratory system development	biological_process	6	1	42	7	16864	0.0173069
GO:0048341	paraxial mesoderm formation	biological_process	7	1	42	7	16864	0.0173069
GO:0006685	sphingomyelin catabolic process	biological_process	9	1	42	7	16864	0.0173069
GO:0004767	sphingomyelin phosphodiesterase activity	molecular_function	8	1	42	7	16864	0.0173069
GO:0008467	[heparan sulfate]-glucosamine 3-sulfotransferase 1 activity	molecular_function	8	1	42	7	16864	0.0173069
GO:0051838	cytolysis by host of symbiont cells	biological_process	7	1	42	7	16864	0.0173069
GO:0019784	NEDD8-specific protease activity	molecular_function	9	1	42	7	16864	0.0173069
GO:0045588	positive regulation of gamma-delta T cell differentiation	biological_process	11	1	42	7	16864	0.0173069
GO:0004888	transmembrane signaling receptor activity	molecular_function	5	3	42	227	16864	0.0187902
GO:0015824	proline transport	biological_process	8	1	42	8	16864	0.0197554
GO:1901522	positive regulation of transcription from RNA polymerase II promoter involved in cellular response to chemical stimulus	biological_process	11	1	42	8	16864	0.0197554
GO:0016462	pyrophosphatase activity	molecular_function	7	1	42	8	16864	0.0197554
GO:0006929	substrate-dependent cell migration	biological_process	7	1	42	8	16864	0.0197554
GO:0032732	positive regulation of interleukin-1 production	biological_process	8	1	42	8	16864	0.0197554
GO:2000617	positive regulation of histone H3-K9 acetylation	biological_process	12	1	42	8	16864	0.0197554
GO:0030132	clathrin coat of coated pit	cellular_component	8	1	42	8	16864	0.0197554
GO:0071439	clathrin complex	cellular_component	6	1	42	8	16864	0.0197554
GO:0045666	positive regulation of neuron differentiation	biological_process	10	2	42	89	16864	0.0206815
GO:2000035	regulation of stem cell division	biological_process	7	1	42	9	16864	0.0221978
GO:0060732	positive regulation of inositol phosphate biosynthetic process	biological_process	10	1	42	9	16864	0.0221978
GO:1904153	negative regulation of retrograde protein transport, ER to cytosol	biological_process	11	1	42	9	16864	0.0221978
GO:0006621	protein retention in ER lumen	biological_process	9	1	42	9	16864	0.0221978
GO:0097104	postsynaptic membrane assembly	biological_process	7	1	42	9	16864	0.0221978
GO:0006930	substrate-dependent cell migration, cell extension	biological_process	8	1	42	10	16864	0.0246344
GO:0070016	armadillo repeat domain binding	molecular_function	6	1	42	10	16864	0.0246344
GO:0009651	response to salt stress	biological_process	6	1	42	10	16864	0.0246344
GO:0140052	cellular response to oxidised low-density lipoprotein particle stimulus	biological_process	6	1	42	10	16864	0.0246344
GO:1990907	beta-catenin-TCF complex	cellular_component	7	1	42	10	16864	0.0246344
GO:0070268	cornification	biological_process	6	2	42	98	16864	0.024752
GO:0005200	structural constituent of cytoskeleton	molecular_function	4	2	42	100	16864	0.0256977
GO:0006898	receptor-mediated endocytosis	biological_process	8	2	42	100	16864	0.0256977
GO:0085029	extracellular matrix assembly	biological_process	6	1	42	11	16864	0.027065
GO:0042391	regulation of membrane potential	biological_process	5	2	42	105	16864	0.0281254
GO:0008381	mechanosensitive ion channel activity	molecular_function	8	1	42	12	16864	0.0294896
GO:0045295	gamma-catenin binding	molecular_function	5	1	42	12	16864	0.0294896
GO:0043586	tongue development	biological_process	7	1	42	12	16864	0.0294896
GO:0042805	actinin binding	molecular_function	6	1	42	12	16864	0.0294896
GO:0030897	HOPS complex	cellular_component	5	1	42	12	16864	0.0294896
GO:2000304	positive regulation of ceramide biosynthetic process	biological_process	9	1	42	12	16864	0.0294896
GO:0000151	ubiquitin ligase complex	cellular_component	5	2	42	110	16864	0.0306419
GO:0050982	detection of mechanical stimulus	biological_process	6	1	42	13	16864	0.0319084
GO:0008328	ionotropic glutamate receptor complex	cellular_component	7	1	42	13	16864	0.0319084
GO:0032963	collagen metabolic process	biological_process	4	1	42	13	16864	0.0319084
GO:0022407	regulation of cell-cell adhesion	biological_process	6	1	42	13	16864	0.0319084
GO:0060389	pathway-restricted SMAD protein phosphorylation	biological_process	10	1	42	13	16864	0.0319084
GO:0031424	keratinization	biological_process	4	2	42	117	16864	0.0343095
GO:0015804	neutral amino acid transport	biological_process	11	1	42	14	16864	0.0343213
GO:0062009	secondary palate development	biological_process	6	1	42	14	16864	0.0343213
GO:0048246	macrophage chemotaxis	biological_process	6	1	42	14	16864	0.0343213
GO:0070742	C2H2 zinc finger domain binding	molecular_function	6	1	42	14	16864	0.0343213
GO:0034220	ion transmembrane transport	biological_process	7	3	42	292	16864	0.0359125
GO:0005160	transforming growth factor beta receptor binding	molecular_function	7	1	42	15	16864	0.0367284
GO:0030278	regulation of ossification	biological_process	6	1	42	15	16864	0.0367284
GO:1903543	positive regulation of exosomal secretion	biological_process	7	1	42	15	16864	0.0367284
GO:0003073	regulation of systemic arterial blood pressure	biological_process	6	1	42	15	16864	0.0367284
GO:0045667	regulation of osteoblast differentiation	biological_process	7	1	42	16	16864	0.0391295
GO:0071625	vocalization behavior	biological_process	4	1	42	16	16864	0.0391295
GO:0008301	DNA binding, bending	molecular_function	7	1	42	16	16864	0.0391295
GO:0007097	nuclear migration	biological_process	7	1	42	16	16864	0.0391295
GO:0008066	glutamate receptor activity	molecular_function	6	1	42	16	16864	0.0391295
GO:0071682	endocytic vesicle lumen	cellular_component	7	1	42	16	16864	0.0391295
GO:0000976	transcription regulatory region sequence-specific DNA binding	molecular_function	8	3	42	307	16864	0.0407085
GO:0007165	signal transduction	biological_process	4	9	42	1897	16864	0.0409625
GO:0005882	intermediate filament	cellular_component	7	2	42	129	16864	0.0409713
GO:0021542	dentate gyrus development	biological_process	5	1	42	17	16864	0.0415249
GO:0005326	neurotransmitter transmembrane transporter activity	molecular_function	4	1	42	17	16864	0.0415249
GO:0007158	neuron cell-cell adhesion	biological_process	6	1	42	17	16864	0.0415249
GO:1901653	cellular response to peptide	biological_process	8	1	42	17	16864	0.0415249
GO:0005328	neurotransmitter:sodium symporter activity	molecular_function	5	1	42	17	16864	0.0415249
GO:0043923	positive regulation by host of viral transcription	biological_process	10	1	42	17	16864	0.0415249
GO:0050708	regulation of protein secretion	biological_process	9	1	42	17	16864	0.0415249
GO:1990837	sequence-specific double-stranded DNA binding	molecular_function	8	4	42	528	16864	0.0416673
GO:0004970	ionotropic glutamate receptor activity	molecular_function	7	1	42	18	16864	0.0439144
GO:0005242	inward rectifier potassium channel activity	molecular_function	10	1	42	18	16864	0.0439144
GO:0030705	cytoskeleton-dependent intracellular transport	biological_process	7	1	42	19	16864	0.0462981
GO:2000147	positive regulation of cell motility	biological_process	7	1	42	19	16864	0.0462981
GO:0035066	positive regulation of histone acetylation	biological_process	11	1	42	19	16864	0.0462981
GO:0031638	zymogen activation	biological_process	9	1	42	19	16864	0.0462981
GO:0032924	activin receptor signaling pathway	biological_process	8	1	42	19	16864	0.0462981
GO:0030517	negative regulation of axon extension	biological_process	8	1	42	20	16864	0.0486759
GO:0000137	Golgi cis cisterna	cellular_component	8	1	42	20	16864	0.0486759
GO:0033627	cell adhesion mediated by integrin	biological_process	5	1	42	21	16864	0.051048
GO:0045022	early endosome to late endosome transport	biological_process	8	1	42	21	16864	0.051048
GO:0034364	high-density lipoprotein particle	cellular_component	5	1	42	21	16864	0.051048
GO:0004709	MAP kinase kinase kinase activity	molecular_function	9	1	42	22	16864	0.0534144
GO:0019222	regulation of metabolic process	biological_process	5	1	42	22	16864	0.0534144
GO:0008083	growth factor activity	molecular_function	7	2	42	151	16864	0.0543201
GO:0000977	RNA polymerase II regulatory region sequence-specific DNA binding	molecular_function	9	3	42	348	16864	0.0553851
GO:0043027	cysteine-type endopeptidase inhibitor activity involved in apoptotic process	molecular_function	9	1	42	23	16864	0.0557749
GO:0035235	ionotropic glutamate receptor signaling pathway	biological_process	7	1	42	23	16864	0.0557749
GO:0098686	hippocampal mossy fiber to CA3 synapse	cellular_component	5	1	42	23	16864	0.0557749
GO:0016324	apical plasma membrane	cellular_component	5	3	42	351	16864	0.056547
GO:0042393	histone binding	molecular_function	5	2	42	156	16864	0.0575434
GO:0035904	aorta development	biological_process	7	1	42	24	16864	0.0581297
GO:0002009	morphogenesis of an epithelium	biological_process	6	1	42	25	16864	0.0604788
GO:0043401	steroid hormone mediated signaling pathway	biological_process	6	1	42	25	16864	0.0604788
GO:0051018	protein kinase A binding	molecular_function	5	1	42	25	16864	0.0604788
GO:0045453	bone resorption	biological_process	8	1	42	25	16864	0.0604788
GO:0043425	bHLH transcription factor binding	molecular_function	7	1	42	25	16864	0.0604788
GO:0045334	clathrin-coated endocytic vesicle	cellular_component	9	1	42	26	16864	0.0628222
GO:0071353	cellular response to interleukin-4	biological_process	8	1	42	26	16864	0.0628222
GO:0045879	negative regulation of smoothened signaling pathway	biological_process	9	1	42	26	16864	0.0628222
GO:0008305	integrin complex	cellular_component	5	1	42	26	16864	0.0628222
GO:0006672	ceramide metabolic process	biological_process	9	1	42	26	16864	0.0628222
GO:0005773	vacuole	cellular_component	6	1	42	26	16864	0.0628222
GO:0005198	structural molecule activity	molecular_function	3	2	42	164	16864	0.0628364
GO:0098609	cell-cell adhesion	biological_process	5	2	42	167	16864	0.064863
GO:0051959	dynein light intermediate chain binding	molecular_function	5	1	42	27	16864	0.0651599
GO:0043113	receptor clustering	biological_process	6	1	42	27	16864	0.0651599
GO:0045840	positive regulation of mitotic nuclear division	biological_process	9	1	42	27	16864	0.0651599
GO:1900745	positive regulation of p38MAPK cascade	biological_process	13	1	42	27	16864	0.0651599
GO:0030659	cytoplasmic vesicle membrane	cellular_component	6	2	42	168	16864	0.0655434
GO:0007010	cytoskeleton organization	biological_process	6	2	42	169	16864	0.0662263
GO:0060976	coronary vasculature development	biological_process	6	1	42	28	16864	0.0674918
GO:1904837	beta-catenin-TCF complex assembly	biological_process	7	1	42	28	16864	0.0674918
GO:0003333	amino acid transmembrane transport	biological_process	11	1	42	28	16864	0.0674918
GO:0004620	phospholipase activity	molecular_function	7	1	42	28	16864	0.0674918
GO:0030111	regulation of Wnt signaling pathway	biological_process	8	1	42	28	16864	0.0674918
GO:0001569	branching involved in blood vessel morphogenesis	biological_process	7	1	42	29	16864	0.0698181
GO:0001944	vasculature development	biological_process	6	1	42	29	16864	0.0698181
GO:0050715	positive regulation of cytokine secretion	biological_process	8	1	42	29	16864	0.0698181
GO:0035249	synaptic transmission, glutamatergic	biological_process	10	1	42	30	16864	0.0721387
GO:0048468	cell development	biological_process	5	1	42	30	16864	0.0721387
GO:0008045	motor neuron axon guidance	biological_process	7	1	42	30	16864	0.0721387
GO:0048008	platelet-derived growth factor receptor signaling pathway	biological_process	8	1	42	31	16864	0.0744537
GO:0006953	acute-phase response	biological_process	8	1	42	31	16864	0.0744537
GO:1904315	transmitter-gated ion channel activity involved in regulation of postsynaptic membrane potential	molecular_function	10	1	42	31	16864	0.0744537
GO:0030534	adult behavior	biological_process	4	1	42	31	16864	0.0744537
GO:0006811	ion transport	biological_process	6	4	42	644	16864	0.0753151
GO:0000978	RNA polymerase II cis-regulatory region sequence-specific DNA binding	molecular_function	10	4	42	646	16864	0.0759898
GO:0060325	face morphogenesis	biological_process	5	1	42	32	16864	0.076763
GO:0002040	sprouting angiogenesis	biological_process	6	1	42	32	16864	0.076763
GO:0035115	embryonic forelimb morphogenesis	biological_process	8	1	42	33	16864	0.0790667
GO:0048701	embryonic cranial skeleton morphogenesis	biological_process	8	1	42	33	16864	0.0790667
GO:0031624	ubiquitin conjugating enzyme binding	molecular_function	7	1	42	33	16864	0.0790667
GO:0043392	negative regulation of DNA binding	biological_process	7	1	42	33	16864	0.0790667
GO:0004553	hydrolase activity, hydrolyzing O-glycosyl compounds	molecular_function	6	1	42	33	16864	0.0790667
GO:0015276	ligand-gated ion channel activity	molecular_function	7	1	42	33	16864	0.0790667
GO:0048863	stem cell differentiation	biological_process	6	1	42	33	16864	0.0790667
GO:0042100	B cell proliferation	biological_process	8	1	42	34	16864	0.0813648
GO:0007202	activation of phospholipase C activity	biological_process	11	1	42	34	16864	0.0813648
GO:0005246	calcium channel regulator activity	molecular_function	6	1	42	34	16864	0.0813648
GO:0060349	bone morphogenesis	biological_process	6	1	42	34	16864	0.0813648
GO:0071897	DNA biosynthetic process	biological_process	8	1	42	35	16864	0.0836573
GO:0045773	positive regulation of axon extension	biological_process	8	1	42	36	16864	0.0859442
GO:0043491	protein kinase B signaling	biological_process	6	1	42	36	16864	0.0859442
GO:0043967	histone H4 acetylation	biological_process	11	1	42	36	16864	0.0859442
GO:0007223	Wnt signaling pathway, calcium modulating pathway	biological_process	9	1	42	36	16864	0.0859442
GO:0048286	lung alveolus development	biological_process	5	1	42	36	16864	0.0859442
GO:0006915	apoptotic process	biological_process	6	4	42	680	16864	0.0879322
GO:0071773	cellular response to BMP stimulus	biological_process	8	1	42	37	16864	0.0882256
GO:0034614	cellular response to reactive oxygen species	biological_process	7	1	42	37	16864	0.0882256
GO:0004930	G protein-coupled receptor activity	molecular_function	6	4	42	686	16864	0.0901312
GO:0006024	glycosaminoglycan biosynthetic process	biological_process	8	1	42	38	16864	0.0905013
GO:0007032	endosome organization	biological_process	7	1	42	38	16864	0.0905013
GO:0046326	positive regulation of glucose import	biological_process	10	1	42	38	16864	0.0905013
GO:0002548	monocyte chemotaxis	biological_process	6	1	42	39	16864	0.0927716
GO:0006687	glycosphingolipid metabolic process	biological_process	9	1	42	39	16864	0.0927716
GO:0070317	negative regulation of G0 to G1 transition	biological_process	9	1	42	39	16864	0.0927716
GO:0015171	amino acid transmembrane transporter activity	molecular_function	7	1	42	39	16864	0.0927716
GO:0009888	tissue development	biological_process	5	1	42	39	16864	0.0927716
GO:0001228	DNA-binding transcription activator activity, RNA polymerase II-specific	molecular_function	6	3	42	436	16864	0.0941099
GO:0043966	histone H3 acetylation	biological_process	11	1	42	40	16864	0.0950363
GO:0007257	activation of JUN kinase activity	biological_process	14	1	42	40	16864	0.0950363
GO:0050909	sensory perception of taste	biological_process	8	1	42	40	16864	0.0950363
GO:0016323	basolateral plasma membrane	cellular_component	5	2	42	209	16864	0.0953641
GO:0030163	protein catabolic process	biological_process	7	1	42	41	16864	0.0972955
GO:1990573	potassium ion import across plasma membrane	biological_process	11	1	42	41	16864	0.0972955
GO:0017046	peptide hormone binding	molecular_function	6	1	42	41	16864	0.0972955
GO:0016021	integral component of membrane	cellular_component	5	17	42	5066	16864	0.0974507
GO:0030217	T cell differentiation	biological_process	8	1	42	42	16864	0.0995491
GO:0001837	epithelial to mesenchymal transition	biological_process	7	1	42	42	16864	0.0995491
GO:0099056	integral component of presynaptic membrane	cellular_component	6	1	42	42	16864	0.0995491
GO:0010718	positive regulation of epithelial to mesenchymal transition	biological_process	8	1	42	43	16864	0.101797
GO:0007040	lysosome organization	biological_process	8	1	42	43	16864	0.101797
GO:0016358	dendrite development	biological_process	8	1	42	43	16864	0.101797
GO:0030331	estrogen receptor binding	molecular_function	9	1	42	43	16864	0.101797
GO:0008528	G protein-coupled peptide receptor activity	molecular_function	6	1	42	43	16864	0.101797
GO:0000186	activation of MAPKK activity	biological_process	13	1	42	44	16864	0.10404
GO:0007186	G protein-coupled receptor signaling pathway	biological_process	5	5	42	1011	16864	0.104688
GO:0044267	cellular protein metabolic process	biological_process	7	2	42	221	16864	0.10472
GO:0045595	regulation of cell differentiation	biological_process	6	1	42	45	16864	0.106277
GO:0006836	neurotransmitter transport	biological_process	6	1	42	45	16864	0.106277
GO:0048705	skeletal system morphogenesis	biological_process	6	1	42	45	16864	0.106277
GO:0032993	protein-DNA complex	cellular_component	4	1	42	45	16864	0.106277
GO:0003682	chromatin binding	molecular_function	4	3	42	463	16864	0.10777
GO:0008333	endosome to lysosome transport	biological_process	8	1	42	46	16864	0.108509
GO:0005667	transcription factor complex	cellular_component	4	2	42	228	16864	0.110291
GO:0001756	somitogenesis	biological_process	7	1	42	49	16864	0.115172
GO:0031122	cytoplasmic microtubule organization	biological_process	8	1	42	50	16864	0.117382
GO:0008146	sulfotransferase activity	molecular_function	6	1	42	50	16864	0.117382
GO:0031965	nuclear membrane	cellular_component	5	2	42	237	16864	0.117568
GO:0030155	regulation of cell adhesion	biological_process	5	1	42	51	16864	0.119587
GO:0007269	neurotransmitter secretion	biological_process	6	1	42	51	16864	0.119587
GO:0005261	cation channel activity	molecular_function	7	1	42	51	16864	0.119587
GO:0007268	chemical synaptic transmission	biological_process	9	2	42	242	16864	0.121663
GO:0070491	repressing transcription factor binding	molecular_function	7	1	42	52	16864	0.121786
GO:0043525	positive regulation of neuron apoptotic process	biological_process	10	1	42	53	16864	0.12398
GO:0045785	positive regulation of cell adhesion	biological_process	6	1	42	53	16864	0.12398
GO:0035176	social behavior	biological_process	5	1	42	53	16864	0.12398
GO:0043195	terminal bouton	cellular_component	6	1	42	54	16864	0.126169
GO:0030326	embryonic limb morphogenesis	biological_process	7	1	42	56	16864	0.13053
GO:0008081	phosphoric diester hydrolase activity	molecular_function	7	1	42	56	16864	0.13053
GO:0048856	anatomical structure development	biological_process	4	1	42	56	16864	0.13053
GO:0004842	ubiquitin-protein transferase activity	molecular_function	6	2	42	255	16864	0.132473
GO:0006665	sphingolipid metabolic process	biological_process	8	1	42	57	16864	0.132702
GO:0061844	antimicrobial humoral immune response mediated by antimicrobial peptide	biological_process	7	1	42	57	16864	0.132702
GO:0007187	G protein-coupled receptor signaling pathway, coupled to cyclic nucleotide second messenger	biological_process	6	1	42	57	16864	0.132702
GO:0031526	brush border membrane	cellular_component	6	1	42	57	16864	0.132702
GO:0007275	multicellular organism development	biological_process	4	5	42	1096	16864	0.134693
GO:0071345	cellular response to cytokine stimulus	biological_process	7	1	42	58	16864	0.13487
GO:0006865	amino acid transport	biological_process	10	1	42	58	16864	0.13487
GO:0045095	keratin filament	cellular_component	8	1	42	58	16864	0.13487
GO:0007166	cell surface receptor signaling pathway	biological_process	5	2	42	258	16864	0.134999
GO:0008233	peptidase activity	molecular_function	5	3	42	514	16864	0.13554
GO:0050839	cell adhesion molecule binding	molecular_function	5	1	42	59	16864	0.137032
GO:0010508	positive regulation of autophagy	biological_process	9	1	42	59	16864	0.137032
GO:0097110	scaffold protein binding	molecular_function	5	1	42	60	16864	0.139189
GO:0005886	plasma membrane	cellular_component	4	15	42	4574	16864	0.14064
GO:0071333	cellular response to glucose stimulus	biological_process	10	1	42	61	16864	0.14134
GO:0045669	positive regulation of osteoblast differentiation	biological_process	8	1	42	61	16864	0.14134
GO:0048661	positive regulation of smooth muscle cell proliferation	biological_process	8	1	42	61	16864	0.14134
GO:0060348	bone development	biological_process	6	1	42	61	16864	0.14134
GO:0005881	cytoplasmic microtubule	cellular_component	8	1	42	62	16864	0.143486
GO:0007200	phospholipase C-activating G protein-coupled receptor signaling pathway	biological_process	6	1	42	62	16864	0.143486
GO:0000209	protein polyubiquitination	biological_process	12	2	42	268	16864	0.143499
GO:0006357	regulation of transcription by RNA polymerase II	biological_process	9	4	42	818	16864	0.144934
GO:0007416	synapse assembly	biological_process	6	1	42	63	16864	0.145627
GO:0042472	inner ear morphogenesis	biological_process	6	1	42	63	16864	0.145627
GO:0009612	response to mechanical stimulus	biological_process	5	1	42	63	16864	0.145627
GO:0007188	adenylate cyclase-modulating G protein-coupled receptor signaling pathway	biological_process	7	1	42	63	16864	0.145627
GO:0060079	excitatory postsynaptic potential	biological_process	7	1	42	63	16864	0.145627
GO:0001664	G protein-coupled receptor binding	molecular_function	6	1	42	64	16864	0.147763
GO:0016192	vesicle-mediated transport	biological_process	6	2	42	275	16864	0.149517
GO:0005518	collagen binding	molecular_function	5	1	42	65	16864	0.149894
GO:0031093	platelet alpha granule lumen	cellular_component	8	1	42	65	16864	0.149894
GO:0030139	endocytic vesicle	cellular_component	7	1	42	65	16864	0.149894
GO:0005576	extracellular region	cellular_component	3	8	42	2125	16864	0.151548
GO:0001932	regulation of protein phosphorylation	biological_process	9	1	42	66	16864	0.152019
GO:0050804	modulation of chemical synaptic transmission	biological_process	8	1	42	67	16864	0.154139
GO:0070301	cellular response to hydrogen peroxide	biological_process	8	1	42	67	16864	0.154139
GO:0005905	clathrin-coated pit	cellular_component	4	1	42	67	16864	0.154139
GO:0001558	regulation of cell growth	biological_process	6	1	42	68	16864	0.156254
GO:0060070	canonical Wnt signaling pathway	biological_process	8	1	42	69	16864	0.158364
GO:0021766	hippocampus development	biological_process	5	1	42	70	16864	0.160469
GO:0030136	clathrin-coated vesicle	cellular_component	8	1	42	71	16864	0.162569
GO:0031398	positive regulation of protein ubiquitination	biological_process	11	1	42	71	16864	0.162569
GO:0045892	negative regulation of transcription, DNA-templated	biological_process	9	3	42	561	16864	0.163115
GO:0030097	hemopoiesis	biological_process	7	1	42	72	16864	0.164663
GO:0002244	hematopoietic progenitor cell differentiation	biological_process	6	1	42	72	16864	0.164663
GO:0070821	tertiary granule membrane	cellular_component	8	1	42	72	16864	0.164663
GO:0043154	negative regulation of cysteine-type endopeptidase activity involved in apoptotic process	biological_process	10	1	42	74	16864	0.168837
GO:0098655	cation transmembrane transport	biological_process	8	1	42	74	16864	0.168837
GO:0007265	Ras protein signal transduction	biological_process	7	1	42	74	16864	0.168837
GO:0045444	fat cell differentiation	biological_process	6	1	42	74	16864	0.168837
GO:0000987	cis-regulatory region sequence-specific DNA binding	molecular_function	9	1	42	74	16864	0.168837
GO:0043130	ubiquitin binding	molecular_function	6	1	42	75	16864	0.170916
GO:0006812	cation transport	biological_process	7	1	42	76	16864	0.17299
GO:0030593	neutrophil chemotaxis	biological_process	7	1	42	77	16864	0.175059
GO:0042734	presynaptic membrane	cellular_component	5	1	42	77	16864	0.175059
GO:0030307	positive regulation of cell growth	biological_process	7	1	42	77	16864	0.175059
GO:0042147	retrograde transport, endosome to Golgi	biological_process	8	1	42	78	16864	0.177123
GO:0060326	cell chemotaxis	biological_process	6	1	42	78	16864	0.177123
GO:0071260	cellular response to mechanical stimulus	biological_process	6	1	42	79	16864	0.179182
GO:0051216	cartilage development	biological_process	6	1	42	79	16864	0.179182
GO:0006511	ubiquitin-dependent protein catabolic process	biological_process	10	2	42	317	16864	0.186599
GO:0008013	beta-catenin binding	molecular_function	5	1	42	83	16864	0.187367
GO:0001843	neural tube closure	biological_process	7	1	42	84	16864	0.189401
GO:0008076	voltage-gated potassium channel complex	cellular_component	9	1	42	84	16864	0.189401
GO:0007155	cell adhesion	biological_process	4	3	42	605	16864	0.19036
GO:0030334	regulation of cell migration	biological_process	7	1	42	86	16864	0.193454
GO:0030165	PDZ domain binding	molecular_function	6	1	42	86	16864	0.193454
GO:0006606	protein import into nucleus	biological_process	11	1	42	87	16864	0.195473
GO:0051117	ATPase binding	molecular_function	6	1	42	87	16864	0.195473
GO:0008104	protein localization	biological_process	5	1	42	87	16864	0.195473
GO:0016798	hydrolase activity, acting on glycosyl bonds	molecular_function	5	1	42	87	16864	0.195473
GO:0006508	proteolysis	biological_process	7	3	42	615	16864	0.196717
GO:0009986	cell surface	cellular_component	4	3	42	616	16864	0.197356
GO:0035264	multicellular organism growth	biological_process	4	1	42	88	16864	0.197487
GO:0007286	spermatid development	biological_process	6	1	42	89	16864	0.199496
GO:0060071	Wnt signaling pathway, planar cell polarity pathway	biological_process	9	1	42	90	16864	0.2015
GO:0008544	epidermis development	biological_process	6	1	42	91	16864	0.2035
GO:0050830	defense response to Gram-positive bacterium	biological_process	9	1	42	91	16864	0.2035
GO:0045893	positive regulation of transcription, DNA-templated	biological_process	9	3	42	629	16864	0.205708
GO:0007160	cell-matrix adhesion	biological_process	6	1	42	93	16864	0.207484
GO:0005604	basement membrane	cellular_component	6	1	42	96	16864	0.213423
GO:0016020	membrane	cellular_component	3	22	42	7614	16864	0.215052
GO:0007179	transforming growth factor beta receptor signaling pathway	biological_process	8	1	42	97	16864	0.215394
GO:0007229	integrin-mediated signaling pathway	biological_process	6	1	42	98	16864	0.217359
GO:0007409	axonogenesis	biological_process	9	1	42	98	16864	0.217359
GO:0000139	Golgi membrane	cellular_component	7	3	42	651	16864	0.220033
GO:0030667	secretory granule membrane	cellular_component	7	1	42	100	16864	0.221275
GO:0050728	negative regulation of inflammatory response	biological_process	9	1	42	100	16864	0.221275
GO:0007517	muscle organ development	biological_process	6	1	42	100	16864	0.221275
GO:0030324	lung development	biological_process	6	1	42	100	16864	0.221275
GO:0030141	secretory granule	cellular_component	8	1	42	101	16864	0.223226
GO:0030154	cell differentiation	biological_process	5	4	42	976	16864	0.223857
GO:0006334	nucleosome assembly	biological_process	7	1	42	102	16864	0.225172
GO:0005794	Golgi apparatus	cellular_component	6	5	42	1321	16864	0.22991
GO:0042060	wound healing	biological_process	6	1	42	106	16864	0.23291
GO:0006874	cellular calcium ion homeostasis	biological_process	11	1	42	106	16864	0.23291
GO:0030168	platelet activation	biological_process	5	1	42	107	16864	0.234832
GO:0070062	extracellular exosome	cellular_component	7	7	42	2029	16864	0.235975
GO:0007030	Golgi organization	biological_process	6	1	42	110	16864	0.240572
GO:0042826	histone deacetylase binding	molecular_function	6	1	42	113	16864	0.246269
GO:0036459	thiol-dependent ubiquitinyl hydrolase activity	molecular_function	9	1	42	113	16864	0.246269
GO:0004843	thiol-dependent ubiquitin-specific protease activity	molecular_function	10	1	42	114	16864	0.248159
GO:0001764	neuron migration	biological_process	7	1	42	114	16864	0.248159
GO:0015293	symporter activity	molecular_function	7	1	42	115	16864	0.250044
GO:0002576	platelet degranulation	biological_process	9	1	42	121	16864	0.261259
GO:0009653	anatomical structure morphogenesis	biological_process	4	1	42	125	16864	0.268644
GO:0007156	homophilic cell adhesion via plasma membrane adhesion molecules	biological_process	7	1	42	126	16864	0.270479
GO:0000187	activation of MAPK activity	biological_process	13	1	42	127	16864	0.27231
GO:0017124	SH3 domain binding	molecular_function	6	1	42	128	16864	0.274136
GO:0006814	sodium ion transport	biological_process	9	1	42	128	16864	0.274136
GO:0005925	focal adhesion	cellular_component	7	2	42	414	16864	0.275797
GO:0071356	cellular response to tumor necrosis factor	biological_process	8	1	42	130	16864	0.277775
GO:0008285	negative regulation of cell population proliferation	biological_process	7	2	42	417	16864	0.278583
GO:0007015	actin filament organization	biological_process	6	1	42	136	16864	0.288584
GO:0006813	potassium ion transport	biological_process	9	1	42	136	16864	0.288584
GO:0031225	anchored component of membrane	cellular_component	5	1	42	137	16864	0.290371
GO:0071805	potassium ion transmembrane transport	biological_process	10	1	42	137	16864	0.290371
GO:0008236	serine-type peptidase activity	molecular_function	6	1	42	137	16864	0.290371
GO:0061024	membrane organization	biological_process	5	1	42	138	16864	0.292152
GO:0007417	central nervous system development	biological_process	6	1	42	142	16864	0.299236
GO:0005244	voltage-gated ion channel activity	molecular_function	9	1	42	143	16864	0.300996
GO:0010628	positive regulation of gene expression	biological_process	8	2	42	444	16864	0.303626
GO:0009887	animal organ morphogenesis	biological_process	5	1	42	147	16864	0.307994
GO:0034765	regulation of ion transmembrane transport	biological_process	8	1	42	148	16864	0.309732
GO:0005770	late endosome	cellular_component	8	1	42	148	16864	0.309732
GO:0098793	presynapse	cellular_component	4	1	42	150	16864	0.313197
GO:0000278	mitotic cell cycle	biological_process	5	1	42	151	16864	0.314922
GO:0006935	chemotaxis	biological_process	5	1	42	151	16864	0.314922
GO:0008234	cysteine-type peptidase activity	molecular_function	7	1	42	152	16864	0.316644
GO:0004252	serine-type endopeptidase activity	molecular_function	8	1	42	152	16864	0.316644
GO:0045944	positive regulation of transcription by RNA polymerase II	biological_process	10	4	42	1150	16864	0.321103
GO:0043204	perikaryon	cellular_component	5	1	42	156	16864	0.323488
GO:0008201	heparin binding	molecular_function	6	1	42	162	16864	0.333629
GO:0050896	response to stimulus	biological_process	3	2	42	477	16864	0.334057
GO:0003700	DNA-binding transcription factor activity	molecular_function	4	3	42	819	16864	0.334289
GO:0008237	metallopeptidase activity	molecular_function	7	1	42	163	16864	0.335305
GO:0030182	neuron differentiation	biological_process	6	1	42	164	16864	0.336977
GO:0000981	DNA-binding transcription factor activity, RNA polymerase II-specific	molecular_function	5	3	42	829	16864	0.341208
GO:0005912	adherens junction	cellular_component	5	1	42	168	16864	0.343622
GO:0006367	transcription initiation from RNA polymerase II promoter	biological_process	9	1	42	169	16864	0.345273
GO:0005802	trans-Golgi network	cellular_component	7	1	42	173	16864	0.351838
GO:0007568	aging	biological_process	4	1	42	173	16864	0.351838
GO:0015630	microtubule cytoskeleton	cellular_component	7	1	42	173	16864	0.351838
GO:0046777	protein autophosphorylation	biological_process	10	1	42	175	16864	0.355096
GO:0005216	ion channel activity	molecular_function	6	1	42	177	16864	0.358337
GO:0090090	negative regulation of canonical Wnt signaling pathway	biological_process	10	1	42	178	16864	0.359953
GO:0008152	metabolic process	biological_process	3	1	42	187	16864	0.37431
GO:0008022	protein C-terminus binding	molecular_function	5	1	42	190	16864	0.379026
GO:0016787	hydrolase activity	molecular_function	4	5	42	1648	16864	0.392452
GO:0045211	postsynaptic membrane	cellular_component	5	1	42	200	16864	0.394496
GO:0005635	nuclear envelope	cellular_component	6	1	42	201	16864	0.396022
GO:0051015	actin filament binding	molecular_function	7	1	42	202	16864	0.397544
GO:0046872	metal ion binding	molecular_function	6	10	42	3582	16864	0.40018
GO:0043235	receptor complex	cellular_component	4	1	42	204	16864	0.400578
GO:0005887	integral component of plasma membrane	cellular_component	6	4	42	1293	16864	0.403904
GO:0005819	spindle	cellular_component	6	1	42	209	16864	0.408096
GO:0005975	carbohydrate metabolic process	biological_process	5	1	42	223	16864	0.428662
GO:0016055	Wnt signaling pathway	biological_process	7	1	42	225	16864	0.431542
GO:0007411	axon guidance	biological_process	6	1	42	228	16864	0.435837
GO:0016567	protein ubiquitination	biological_process	11	2	42	592	16864	0.436609
GO:0030335	positive regulation of cell migration	biological_process	8	1	42	235	16864	0.445733
GO:0038023	signaling receptor activity	molecular_function	4	1	42	237	16864	0.44853
GO:0098978	glutamatergic synapse	cellular_component	4	1	42	241	16864	0.454081
GO:0008017	microtubule binding	molecular_function	7	1	42	251	16864	0.467722
GO:0016477	cell migration	biological_process	6	1	42	252	16864	0.469068
GO:0030198	extracellular matrix organization	biological_process	6	1	42	252	16864	0.469068
GO:0042803	protein homodimerization activity	molecular_function	6	2	42	634	16864	0.472088
GO:0014069	postsynaptic density	cellular_component	5	1	42	262	16864	0.482343
GO:0015031	protein transport	biological_process	9	2	42	647	16864	0.482812
GO:0019904	protein domain specific binding	molecular_function	5	1	42	264	16864	0.484959
GO:0005509	calcium ion binding	molecular_function	7	2	42	653	16864	0.487718
GO:0016579	protein deubiquitination	biological_process	9	1	42	268	16864	0.490152
GO:0042802	identical protein binding	molecular_function	5	4	42	1458	16864	0.497567
GO:0010008	endosome membrane	cellular_component	8	1	42	275	16864	0.499118
GO:0019221	cytokine-mediated signaling pathway	biological_process	6	1	42	277	16864	0.501651
GO:0061630	ubiquitin protein ligase activity	molecular_function	7	1	42	282	16864	0.507929
GO:0050911	detection of chemical stimulus involved in sensory perception of smell	biological_process	7	1	42	305	16864	0.535829
GO:0004984	olfactory receptor activity	molecular_function	6	1	42	307	16864	0.53818
GO:0006886	intracellular protein transport	biological_process	10	1	42	319	16864	0.552048
GO:0008289	lipid binding	molecular_function	4	1	42	321	16864	0.55432
GO:0007608	sensory perception of smell	biological_process	8	1	42	330	16864	0.564403
GO:0031410	cytoplasmic vesicle	cellular_component	6	2	42	765	16864	0.574009
GO:0010468	regulation of gene expression	biological_process	7	1	42	339	16864	0.574263
GO:0043687	post-translational protein modification	biological_process	9	1	42	340	16864	0.575345
GO:0045202	synapse	cellular_component	3	2	42	767	16864	0.575454
GO:0005874	microtubule	cellular_component	7	1	42	344	16864	0.579647
GO:0008270	zinc ion binding	molecular_function	8	2	42	788	16864	0.590429
GO:0062023	collagen-containing extracellular matrix	cellular_component	5	1	42	362	16864	0.598483
GO:0005575	cellular_component	cellular_component	2	1	42	366	16864	0.602555
GO:0008134	transcription factor binding	molecular_function	5	1	42	369	16864	0.605583
GO:0003779	actin binding	molecular_function	6	1	42	375	16864	0.611571
GO:0005102	signaling receptor binding	molecular_function	5	1	42	388	16864	0.624243
GO:0003677	DNA binding	molecular_function	6	5	42	2135	16864	0.628238
GO:0004674	protein serine/threonine kinase activity	molecular_function	8	1	42	401	16864	0.636511
GO:0030424	axon	cellular_component	6	1	42	410	16864	0.644774
GO:0043025	neuronal cell body	cellular_component	5	1	42	416	16864	0.650181
GO:0007283	spermatogenesis	biological_process	7	1	42	436	16864	0.667629
GO:0043005	neuron projection	cellular_component	5	1	42	444	16864	0.674368
GO:0005615	extracellular space	cellular_component	4	3	42	1402	16864	0.689957
GO:0006355	regulation of transcription, DNA-templated	biological_process	8	3	42	1403	16864	0.690435
GO:0045087	innate immune response	biological_process	5	1	42	464	16864	0.690637
GO:0030425	dendrite	cellular_component	6	1	42	468	16864	0.693794
GO:0043312	neutrophil degranulation	biological_process	9	1	42	472	16864	0.69692
GO:0005813	centrosome	cellular_component	7	1	42	505	16864	0.721546
GO:0004672	protein kinase activity	molecular_function	7	1	42	515	16864	0.728615
GO:0043066	negative regulation of apoptotic process	biological_process	9	1	42	519	16864	0.731393
GO:0006629	lipid metabolic process	biological_process	5	1	42	585	16864	0.77342
GO:0006468	protein phosphorylation	biological_process	9	1	42	602	16864	0.78316
GO:0055085	transmembrane transport	biological_process	6	1	42	616	16864	0.790873
GO:0007049	cell cycle	biological_process	4	1	42	648	16864	0.807512
GO:0043565	sequence-specific DNA binding	molecular_function	7	1	42	655	16864	0.810975
GO:0003674	molecular_function	molecular_function	2	1	42	666	16864	0.816295
GO:0005829	cytosol	cellular_component	6	10	42	4904	16864	0.82112
GO:0016301	kinase activity	molecular_function	6	1	42	680	16864	0.822855
GO:0016310	phosphorylation	biological_process	7	1	42	685	16864	0.825142
GO:0003676	nucleic acid binding	molecular_function	5	2	42	1267	16864	0.834394
GO:0016740	transferase activity	molecular_function	4	3	42	1784	16864	0.835814
GO:0005737	cytoplasm	cellular_component	5	13	42	6465	16864	0.874754
GO:0005730	nucleolus	cellular_component	6	1	42	827	16864	0.879307
GO:0000122	negative regulation of transcription by RNA polymerase II	biological_process	10	1	42	837	16864	0.882432
GO:0005524	ATP binding	molecular_function	5	2	42	1447	16864	0.886135
GO:0005634	nucleus	cellular_component	6	12	42	6121	16864	0.887124
GO:0000790	nuclear chromatin	cellular_component	7	1	42	877	16864	0.89416
GO:0043231	intracellular membrane-bounded organelle	cellular_component	5	1	42	890	16864	0.89772
GO:0005783	endoplasmic reticulum	cellular_component	6	2	42	1499	16864	0.898107
GO:0030054	cell junction	cellular_component	3	1	42	902	16864	0.900902
GO:0005789	endoplasmic reticulum membrane	cellular_component	5	1	42	980	16864	0.919351
GO:0005654	nucleoplasm	cellular_component	6	5	42	3599	16864	0.962053
GO:0005856	cytoskeleton	cellular_component	6	1	42	1361	16864	0.970949
GO:0000166	nucleotide binding	molecular_function	5	1	42	1768	16864	0.99051
GO:0005515	protein binding	molecular_function	4	22	42	11896	16864	0.995978
