# Supplementary material for: Whole-Transcriptome Sequencing of Knee Joint Cartilage from Kashin–Beck Disease and Osteoarthritis Patients
Source: Int J Mol Sci. 2024 Apr 15;25(8):4348. doi: 10.3390/ijms25084348 (PMC11049856; doi:10.3390/ijms25084348)
Supplement: Supplementary file 1 [file ijms-25-04348-s001.zip › Supplementary Table S3_KBDVSOA_KEGG_enrichment.xlsx]

## Sheet: Sheet1
Supplementary Table S3. KEGG enrichment analysis results of differentially expressed mRNA between KBD and OA
pathway_id	pathway_name	S gene number	TS gene number	B gene number	TB gene number	pvalue
ko04961	Endocrine and other factor-regulated calcium reabsorption	3	22	47	7028	0.000394909
ko05412	Arrhythmogenic right ventricular cardiomyopathy (ARVC)	2	22	72	7028	0.0209471
ko04520	Adherens junction	2	22	72	7028	0.0209471
ko04350	TGF-beta signaling pathway	2	22	89	7028	0.0310838
ko04928	Parathyroid hormone synthesis, secretion and action	2	22	106	7028	0.0427877
ko04614	Renin-angiotensin system	1	22	23	7028	0.0696775
ko04080	Neuroactive ligand-receptor interaction	3	22	312	7028	0.0715183
ko00534	Glycosaminoglycan biosynthesis - heparan sulfate / heparin	1	22	24	7028	0.0725992
ko04390	Hippo signaling pathway	2	22	151	7028	0.0800642
ko04310	Wnt signaling pathway	2	22	155	7028	0.0837519
ko04392	Hippo signaling pathway - multiple species	1	22	28	7028	0.084199
ko05216	Thyroid cancer	1	22	37	7028	0.109794
ko04810	Regulation of actin cytoskeleton	2	22	207	7028	0.135899
ko00600	Sphingolipid metabolism	1	22	47	7028	0.137432
ko05213	Endometrial cancer	1	22	58	7028	0.166888
ko05217	Basal cell carcinoma	1	22	62	7028	0.177359
ko05221	Acute myeloid leukemia	1	22	66	7028	0.187704
ko05100	Bacterial invasion of epithelial cells	1	22	73	7028	0.20551
ko04971	Gastric acid secretion	1	22	74	7028	0.208023
ko04721	Synaptic vesicle cycle	1	22	75	7028	0.210529
ko04512	ECM-receptor interaction	1	22	82	7028	0.227857
ko05410	Hypertrophic cardiomyopathy (HCM)	1	22	83	7028	0.230303
ko05210	Colorectal cancer	1	22	86	7028	0.237595
ko05414	Dilated cardiomyopathy (DCM)	1	22	87	7028	0.240011
ko05215	Prostate cancer	1	22	97	7028	0.263774
ko04916	Melanogenesis	1	22	99	7028	0.268441
ko04151	PI3K-Akt signaling pathway	2	22	341	7028	0.289598
ko04724	Glutamatergic synapse	1	22	113	7028	0.300326
ko04142	Lysosome	1	22	123	7028	0.322284
ko04915	Estrogen signaling pathway	1	22	132	7028	0.341483
ko04550	Signaling pathways regulating pluripotency of stem cells	1	22	135	7028	0.347766
ko04514	Cell adhesion molecules (CAMs)	1	22	137	7028	0.351923
ko05226	Gastric cancer	1	22	143	7028	0.364243
ko05224	Breast cancer	1	22	144	7028	0.366275
ko04072	Phospholipase D signaling pathway	1	22	147	7028	0.372332
ko04934	Cushing syndrome	1	22	151	7028	0.380322
ko05225	Hepatocellular carcinoma	1	22	158	7028	0.394072
ko04141	Protein processing in endoplasmic reticulum	1	22	162	7028	0.401798
ko04360	Axon guidance	1	22	178	7028	0.431772
ko05202	Transcriptional misregulation in cancer	1	22	180	7028	0.435417
ko05016	Huntington disease	1	22	185	7028	0.44443
ko04510	Focal adhesion	1	22	197	7028	0.465506
ko04015	Rap1 signaling pathway	1	22	203	7028	0.475755
ko05200	Pathways in cancer	2	22	513	7028	0.484639
ko04144	Endocytosis	1	22	239	7028	0.53342
ko04060	Cytokine-cytokine receptor interaction	1	22	268	7028	0.575418
ko05165	Human papillomavirus infection	1	22	323	7028	0.645362
ko04740	Olfactory transduction	1	22	340	7028	0.664655
ko05168	Herpes simplex virus 1 infection	1	22	438	7028	0.757769
