# Supplementary material for: Whole-Transcriptome Sequencing of Knee Joint Cartilage from Kashin–Beck Disease and Osteoarthritis Patients
Source: Int J Mol Sci. 2024 Apr 15;25(8):4348. doi: 10.3390/ijms25084348 (PMC11049856; doi:10.3390/ijms25084348)
Supplement: Supplementary file 1 [file ijms-25-04348-s001.zip › Supplementary Table S4_KBDVSOA_Novel_lncRNA_differential_expression.xlsx]

## Sheet: Sheet1
Supplementary Table S4. Differentially expressed novel lncRNA between KBD and OA
t_id	class_code	chr	strand	start	end	t_name	num_exons	length	gene_id	gene_name	fc	log2(fc)	pval	qval	regulation	significant
423212	i	chr8	+	102380515	102411568	MSTRG.212739.4	2	21539	MSTRG.212739	UBR5	0.000627559	-10.638	1.69621e-24	6.90773e-20	down	yes
274854	o	chr21	+	8205995	8438096	MSTRG.131490.10	2	4868	MSTRG.131490	FP236383	677460	19.3698	6.31463e-24	1.23655e-19	up	yes
87687	j	chr11	+	65499054	65506516	MSTRG.45867.12	5	6321	MSTRG.45867	MALAT1	195094	17.5738	6.31515e-24	1.23655e-19	up	yes
274853	o	chr21	+	8205995	8253060	MSTRG.131490.8	2	3260	MSTRG.131490	FP671120	283769	18.1144	6.31529e-24	1.23655e-19	up	yes
138538	o	chr14	-	49853629	49862914	MSTRG.71629.7	2	498	MSTRG.71629	AL627171	6.67117e-08	-23.8375	1.14747e-23	1.23655e-19	down	yes
138533	o	chr14	-	49853616	49862914	MSTRG.71629.2	2	464	MSTRG.71629	AL627171	6.51814e-08	-23.871	1.14747e-23	1.23655e-19	down	yes
274865	o	chr21	-	8212728	8258173	MSTRG.131493.7	2	1377	MSTRG.131493	FP671120	2.87857e-07	-21.7281	1.14747e-23	1.23655e-19	down	yes
339734	u	chr5	-	10001	11788	MSTRG.166236.2	2	1763	MSTRG.166236	.	3.09641e-06	-18.301	1.1476e-23	1.23655e-19	down	yes
87685	j	chr11	+	65499043	65505019	MSTRG.45867.10	4	5580	MSTRG.45867	MALAT1	4.71146e-06	-17.6954	1.14763e-23	1.23655e-19	down	yes
138542	o	chr14	-	49853834	49862914	MSTRG.71629.11	2	389	MSTRG.71629	AL627171	3.37389e-07	-21.4991	1.14764e-23	1.23655e-19	down	yes
355633	i	chr5	-	134877674	134879778	MSTRG.175838.2	2	1968	MSTRG.175838	TXNDC15	0.000184025	-12.4078	1.41396e-22	1.25618e-18	down	yes
203666	j	chr18	-	23296301	23437961	MSTRG.97757.8	10	2488	MSTRG.97757	TMEM241	0.000236025	-12.0488	2.12862e-22	1.7335e-18	down	yes
368260	i	chr6	-	31415382	31427037	MSTRG.182111.2	1	11656	MSTRG.182111	AL645933	0.000481701	-11.0196	3.34979e-22	2.29726e-18	down	yes
323070	u	chr4	+	49103873	49111295	MSTRG.155688.3	3	2727	MSTRG.155688	.	2.8825e-05	-15.0823	1.06971e-21	6.43311e-18	down	yes
40751	u	chr1	-	125178693	125183257	MSTRG.22508.4	4	2473	MSTRG.22508	.	2.5008e-05	-15.2872	1.17134e-21	6.93758e-18	down	yes
216031	o	chr19	-	13827659	13843031	MSTRG.103688.4	2	14827	MSTRG.103688	AC020916	16572.9	14.0165	2.63054e-21	1.42817e-17	up	yes
243314	u	chr2	+	94219079	94233513	MSTRG.115229.3	2	12751	MSTRG.115229	.	0.00019721	-12.308	6.54157e-21	3.04418e-17	down	yes
47054	j	chr1	+	168226040	168253461	MSTRG.24787.6	9	11375	MSTRG.24787	SFT2D2	0.000105019	-13.2171	9.20511e-21	4.08154e-17	down	yes
430484	o	chr9	+	9403152	9442380	MSTRG.216794.2	2	314	MSTRG.216794	RN7SL5P	487304	18.8945	1.4989e-20	5.76832e-17	up	yes
274863	i	chr21	-	8212725	8214276	MSTRG.131493.6	2	1508	MSTRG.131493	FP671120	2.58146e-05	-15.2415	1.50516e-20	5.76832e-17	down	yes
9325	o	X	-	74247698	74266254	MSTRG.6340.88	2	18533	MSTRG.6340	FTX	0.00019549	-12.3206	1.82915e-20	6.74547e-17	down	yes
40893	u	chr1	-	144327348	144331489	MSTRG.22582.2	3	3185	MSTRG.22582	.	6.64835e-05	-13.8766	1.89573e-20	6.92567e-17	down	yes
344999	u	chr5	-	49656913	49659490	MSTRG.169537.2	4	307	MSTRG.169537	.	6.54815e-06	-17.2205	2.10086e-20	7.46573e-17	down	yes
216030	o	chr19	-	13824091	13843031	MSTRG.103688.3	3	14421	MSTRG.103688	AC020916	11044.2	13.431	2.55261e-20	8.6767e-17	up	yes
130621	i	chr13	-	93601078	93640673	MSTRG.67485.2	2	38609	MSTRG.67485	GPC6	0.000346907	-11.4932	2.67669e-20	9.02004e-17	down	yes
394742	u	chr7	-	56371296	56372204	MSTRG.197469.3	2	371	MSTRG.197469	.	9.19528e-06	-16.7307	3.89757e-20	1.23867e-16	down	yes
99373	u	chr12	-	10001	10590	MSTRG.51355.1	3	456	MSTRG.51355	.	1.21788e-05	-16.3253	5.38674e-20	1.64507e-16	down	yes
97435	o	chr11	-	122132790	122153020	MSTRG.50434.73	2	20124	MSTRG.50434	MIR100	0.000284684	-11.7784	1.12457e-19	2.95033e-16	down	yes
103710	j	chr12	+	21501856	21518660	MSTRG.53236.14	6	3409	MSTRG.53236	GOLT1B	9.76179e-05	-13.3225	1.34122e-19	3.42671e-16	down	yes
40880	u	chr1	-	144138656	144142036	MSTRG.22581.4	2	2083	MSTRG.22581	.	6.93567e-05	-13.8156	1.36784e-19	3.47201e-16	down	yes
20365	i	chr1	+	1842641	1890319	MSTRG.12436.1	2	4193	MSTRG.12436	GNB1	9577.3	13.2254	1.94944e-19	4.55458e-16	up	yes
368171	j	chr6	-	31171624	31179693	MSTRG.182088.1	2	7866	MSTRG.182088	PSORS1C3	2193.54	11.099	2.19548e-19	4.87624e-16	up	yes
3054	o	X	+	24392405	24485674	MSTRG.2058.1	2	6158	MSTRG.2058	PDK3	2494.88	11.2848	2.23137e-19	4.92795e-16	up	yes
40963	i	chr1	-	144824562	144828643	MSTRG.22616.4	3	1932	MSTRG.22616	FP700111	7.30273e-05	-13.7412	2.35058e-19	5.13323e-16	down	yes
103987	i	chr12	+	24186771	24209984	MSTRG.53490.2	2	23194	MSTRG.53490	SOX5	0.000461374	-11.0818	2.68293e-19	5.6998e-16	down	yes
23160	o	chr1	+	16740516	16897805	MSTRG.13634.4	2	1970	MSTRG.13634	CROCCP4	45218.3	15.4646	3.37295e-19	6.83156e-16	up	yes
40750	u	chr1	-	125177769	125183257	MSTRG.22508.3	5	1964	MSTRG.22508	.	8.22097e-05	-13.5703	3.52655e-19	7.03335e-16	down	yes
203030	o	chr18	-	13219094	13243924	MSTRG.97497.2	2	24755	MSTRG.97497	AP002505	1512.08	10.5623	3.61885e-19	7.12189e-16	up	yes
63763	u	chr10	-	42225968	42228833	MSTRG.34260.2	2	2450	MSTRG.34260	.	0.000101859	-13.2611	3.66918e-19	7.13801e-16	down	yes
397621	j	chr7	+	79454015	79471972	MSTRG.198943.33	5	16767	MSTRG.198943	MAGI2-AS3	0.000293309	-11.7353	3.75805e-19	7.23661e-16	down	yes
23158	o	chr1	+	16740516	16897805	MSTRG.13634.2	2	1958	MSTRG.13634	CROCCP4	43876.2	15.4211	3.92957e-19	7.52978e-16	up	yes
40964	i	chr1	-	144824562	144828643	MSTRG.22616.6	4	1944	MSTRG.22616	FP700111	8.41301e-05	-13.537	4.10534e-19	7.69922e-16	down	yes
40881	u	chr1	-	144138656	144142036	MSTRG.22581.5	2	2187	MSTRG.22581	.	7.25573e-05	-13.7505	4.13617e-19	7.69922e-16	down	yes
18568	o	X	+	156019947	156030760	MSTRG.12153.2	2	422	MSTRG.12153	WASH6P	1.98785e-05	-15.6184	5.75603e-19	9.95595e-16	down	yes
338683	i	chr4	-	183850795	183852589	MSTRG.165739.4	5	1214	MSTRG.165739	STOX2	5.83899e-05	-14.0639	6.27568e-19	1.08069e-15	down	yes
397626	j	chr7	+	79454059	79471972	MSTRG.198943.39	5	13354	MSTRG.198943	MAGI2-AS3	4975.8	12.2807	1.02947e-18	1.54484e-15	up	yes
87686	j	chr11	+	65499043	65505019	MSTRG.45867.11	5	5281	MSTRG.45867	MALAT1	0.000114523	-13.0921	1.22493e-18	1.7101e-15	down	yes
386263	i	chr6	-	168484981	168508372	MSTRG.192725.5	4	23186	MSTRG.192725	SMOC2	2899.64	11.5017	1.3705e-18	1.86018e-15	up	yes
372485	j	chr6	-	53001464	53009567	MSTRG.183881.4	4	4051	MSTRG.183881	CILK1	0.00020948	-12.2209	1.57097e-18	2.08876e-15	down	yes
180869	i	chr17	-	242222	244315	MSTRG.89540.3	4	956	MSTRG.89540	RPH3AL	5.72456e-05	-14.0925	1.61515e-18	2.13299e-15	down	yes
20520	i	chr1	-	2262475	2280568	MSTRG.12481.6	2	18058	MSTRG.12481	SKI	3214.04	11.6502	2.04512e-18	2.52987e-15	up	yes
275286	u	chr21	+	10692529	10697223	MSTRG.131713.2	3	355	MSTRG.131713	.	2.26427e-05	-15.4306	2.10715e-18	2.5773e-15	down	yes
40949	i	chr1	+	144635019	144639135	MSTRG.22608.3	2	4091	MSTRG.22608	LINC01632	0.00026518	-11.8807	2.23235e-18	2.62841e-15	down	yes
296648	i	chr3	-	49986926	49999293	MSTRG.141460.2	2	12234	MSTRG.141460	RBM6	0.000319801	-11.6105	2.40392e-18	2.78842e-15	down	yes
280371	j	chr21	-	46584941	46605208	MSTRG.134412.3	4	10671	MSTRG.134412	S100B	5339.46	12.3825	2.73271e-18	3.0671e-15	up	yes
155606	i	chr15	+	61098309	61181248	MSTRG.79537.2	3	82756	MSTRG.79537	RORA	607.05	9.24567	2.81932e-18	3.12656e-15	up	yes
23159	o	chr1	+	16740516	16897805	MSTRG.13634.3	2	1945	MSTRG.13634	CROCCP4	20492.5	14.3228	3.64171e-18	3.82675e-15	up	yes
76987	o	chr11	-	2680220	2700792	MSTRG.41131.7	2	20296	MSTRG.41131	KCNQ1OT1	0.00109356	-9.83675	4.80109e-18	4.73928e-15	down	yes
40894	u	chr1	-	144327348	144331489	MSTRG.22582.3	3	3197	MSTRG.22582	.	0.000257964	-11.9205	5.15897e-18	5.02906e-15	down	yes
76983	o	chr11	-	2652343	2700792	MSTRG.41131.5	4	48188	MSTRG.41131	KCNQ1OT1	1459.23	10.511	5.60289e-18	5.38128e-15	up	yes
386264	i	chr6	-	168484989	168500482	MSTRG.192725.6	3	15327	MSTRG.192725	SMOC2	0.000674575	-10.5337	5.68204e-18	5.44393e-15	down	yes
338684	i	chr4	-	183850795	183852589	MSTRG.165739.5	5	1236	MSTRG.165739	STOX2	0.000107036	-13.1896	6.82282e-18	6.30509e-15	down	yes
339723	o	chr4	+	190122453	190182296	MSTRG.166233.4	4	323	MSTRG.166233	DUX4	2.85166e-05	-15.0978	7.90236e-18	7.02376e-15	down	yes
63652	u	chr10	-	38743962	38746548	MSTRG.34155.3	3	939	MSTRG.34155	.	8.4815e-05	-13.5253	8.16048e-18	7.1121e-15	down	yes
171921	u	chr16	-	46398222	46401647	MSTRG.85760.2	2	3403	MSTRG.85760	.	0.000308709	-11.6615	8.25288e-18	7.13732e-15	down	yes
40788	u	chr1	-	143252958	143253316	MSTRG.22536.9	2	265	MSTRG.22536	.	2.28458e-05	-15.4177	8.32241e-18	7.16574e-15	down	yes
389264	j	chr7	+	17340096	17346152	MSTRG.194390.9	3	3183	MSTRG.194390	AHR	0.000247002	-11.9832	9.1871e-18	7.82408e-15	down	yes
271844	o	chr20	+	48914310	48928188	MSTRG.129964.2	2	3920	MSTRG.129964	ARFGEF2	9000.27	13.1358	1.269e-17	1.00416e-14	up	yes
245762	j	chr2	+	110245697	110287782	MSTRG.116339.8	3	2429	MSTRG.116339	AC140479	0.000187647	-12.3797	1.35347e-17	1.05424e-14	down	yes
434241	u	chr9	-	40594716	40611251	MSTRG.219058.4	3	14205	MSTRG.219058	.	0.00151714	-9.36443	1.56474e-17	1.16952e-14	down	yes
280372	j	chr21	-	46591115	46605208	MSTRG.134412.4	3	8757	MSTRG.134412	S100B	0.000478446	-11.0294	1.57782e-17	1.17481e-14	down	yes
344998	u	chr5	-	49656913	49658715	MSTRG.169537.4	4	217	MSTRG.169537	.	2.33257e-05	-15.3877	1.60355e-17	1.19169e-14	down	yes
344997	u	chr5	-	49656913	49658715	MSTRG.169537.3	4	207	MSTRG.169537	.	2.25128e-05	-15.4389	1.69706e-17	1.24767e-14	down	yes
263630	u	chr2	-	240639987	240641053	MSTRG.126174.1	4	825	MSTRG.126174	.	9.12572e-05	-13.4197	1.81232e-17	1.31436e-14	down	yes
349516	i	chr5	+	84041442	84047425	MSTRG.172173.2	2	5934	MSTRG.172173	EDIL3	0.000585254	-10.7386	2.07035e-17	1.45924e-14	down	yes
19527	o	chr1	-	10001	180998	MSTRG.12314.5	5	382	MSTRG.12314	WASH7P	4.42922e-05	-14.4626	2.1516e-17	1.50459e-14	down	yes
40755	u	chr1	-	125178693	125183257	MSTRG.22508.8	5	2123	MSTRG.22508	.	0.000233359	-12.0652	2.41086e-17	1.64099e-14	down	yes
52369	j	chr1	-	207804419	207823825	MSTRG.27793.13	3	13118	MSTRG.27793	MIR29B2CHG	0.000854737	-10.1922	2.41383e-17	1.64099e-14	down	yes
219113	o	chr19	-	23258178	23274251	MSTRG.104798.11	2	3742	MSTRG.104798	AC092329	0.000269967	-11.8549	2.88061e-17	1.88615e-14	down	yes
219299	o	chr19	+	24049338	24055262	MSTRG.104909.48	2	5818	MSTRG.104909	AC092279	0.000414062	-11.2379	3.41316e-17	2.182e-14	down	yes
278220	i	chr21	+	34985939	35047451	MSTRG.133432.4	2	61439	MSTRG.133432	RUNX1	447.046	8.80428	3.4329e-17	2.182e-14	up	yes
286514	o	chr22	-	41598038	41600892	MSTRG.136915.3	2	2380	MSTRG.136915	DESI1	0.000237587	-12.0393	3.63237e-17	2.26463e-14	down	yes
58564	j	chr10	-	809552	825316	MSTRG.31199.4	7	4312	MSTRG.31199	LARP4B	0.000512586	-10.9299	4.10654e-17	2.48484e-14	down	yes
312179	i	chr3	-	172052098	172087530	MSTRG.150061.1	2	34846	MSTRG.150061	FNDC3B	0.0013496	-9.53325	4.58798e-17	2.71324e-14	down	yes
58497	i	chr10	+	608720	622389	MSTRG.31233.2	2	13548	MSTRG.31233	DIP2C	1838.33	10.8442	4.8877e-17	2.86125e-14	up	yes
217820	i	chr19	+	18500350	18520693	MSTRG.104203.3	3	19725	MSTRG.104203	ELL	0.00121022	-9.69051	5.34057e-17	3.06105e-14	down	yes
194593	i	chr17	-	57432688	57445528	MSTRG.94437.2	2	9606	MSTRG.94437	MSI2	2581.81	11.3342	5.46496e-17	3.10053e-14	up	yes
424754	i	chr8	+	115456009	115478556	MSTRG.213921.9	2	22411	MSTRG.213921	TRPS1	0.0012716	-9.61914	5.57159e-17	3.14732e-14	down	yes
339722	o	chr4	+	190122453	190182296	MSTRG.166233.3	5	366	MSTRG.166233	DUX4	5.68526e-05	-14.1024	6.76568e-17	3.66813e-14	down	yes
13467	j	X	-	115466720	115568555	MSTRG.9029.1	2	5981	MSTRG.9029	PLS3-AS1	3873.62	11.9195	7.03619e-17	3.79374e-14	up	yes
285783	j	chr22	+	38656636	38674419	MSTRG.136626.2	4	1598	MSTRG.136626	CBY1	0.00022433	-12.1221	7.1775e-17	3.8487e-14	down	yes
67033	o	chr10	+	70423665	70429646	MSTRG.36241.5	2	5912	MSTRG.36241	EIF4EBP2	0.000805562	-10.2777	7.21444e-17	3.86321e-14	down	yes
23164	o	chr1	+	16740519	16897805	MSTRG.13634.9	2	1939	MSTRG.13634	CROCCP4	0.000280084	-11.8019	7.4768e-17	3.97106e-14	down	yes
365725	i	chr6	+	17960772	17985637	MSTRG.180832.2	2	24326	MSTRG.180832	KIF13A	1111.77	10.1186	7.62796e-17	4.024e-14	up	yes
288397	u	chr3	-	10001	10916	MSTRG.137644.12	5	429	MSTRG.137644	.	6.9941e-05	-13.8035	8.10668e-17	4.21398e-14	down	yes
204867	i	chr18	.	34168443	34168667	MSTRG.98566.1	1	225	MSTRG.98566	NOL4	3.73154e-05	-14.7099	8.782e-17	4.51104e-14	down	yes
338685	i	chr4	-	183850795	183852589	MSTRG.165739.6	5	828	MSTRG.165739	STOX2	0.000140695	-12.7951	9.59451e-17	4.85189e-14	down	yes
389395	i	chr7	-	18333821	18381135	MSTRG.194558.2	2	47279	MSTRG.194558	HDAC9	0.00303693	-8.36317	9.9118e-17	4.99941e-14	down	yes
96254	i	chr11	-	117726334	117763574	MSTRG.50015.3	2	37221	MSTRG.50015	DSCAML1	0.00243558	-8.68152	1.02472e-16	5.13547e-14	down	yes
23886	i	chr1	+	21144473	21161474	MSTRG.13965.2	2	16394	MSTRG.13965	EIF4G3	0.00109382	-9.83641	1.04151e-16	5.19959e-14	down	yes
185825	o	chr17	+	19061993	19188678	MSTRG.91176.6	2	785	MSTRG.91176	GRAPL	30606.7	14.9016	1.0936e-16	5.41125e-14	up	yes
231471	i	chr2	-	9221344	9251364	MSTRG.109016.2	2	29827	MSTRG.109016	ASAP2	0.00208365	-8.90667	1.11066e-16	5.46827e-14	down	yes
148180	u	chr14	.	105552838	105553126	MSTRG.76167.1	1	289	MSTRG.76167	.	5.02778e-05	-14.2797	1.24842e-16	5.9932e-14	down	yes
178139	i	chr16	-	78646026	78680511	MSTRG.88460.3	2	34405	MSTRG.88460	WWOX	0.0027995	-8.48062	1.29517e-16	6.15293e-14	down	yes
75125	u	chr10	+	128464359	128464626	MSTRG.40449.2	2	225	MSTRG.40449	.	4.13821e-05	-14.5606	1.29543e-16	6.15293e-14	down	yes
443694	j	chr9	+	129498894	129504545	MSTRG.224353.70	2	4254	MSTRG.224353	LINC00963	0.000442785	-11.1411	1.48485e-16	6.82859e-14	down	yes
274288	i	chr20	.	63543744	63544165	MSTRG.131245.1	1	422	MSTRG.131245	SRMS	8.01174e-05	-13.6075	1.56074e-16	7.10536e-14	down	yes
245896	j	chr2	+	111120914	111168445	MSTRG.116411.2	6	4621	MSTRG.116411	BCL2L11	0.000631541	-10.6288	1.57775e-16	7.16312e-14	down	yes
288401	u	chr3	-	10001	10916	MSTRG.137644.3	6	322	MSTRG.137644	.	6.24314e-05	-13.9674	1.58769e-16	7.19922e-14	down	yes
236953	i	chr2	+	47900995	47905088	MSTRG.111880.2	2	4028	MSTRG.111880	FBXO11	0.00019433	-12.3292	1.58938e-16	7.19922e-14	down	yes
283452	i	chr22	+	29120005	29120598	MSTRG.135638.3	5	399	MSTRG.135638	KREMEN1	7.80488e-05	-13.6453	1.66466e-16	7.47954e-14	down	yes
385443	i	chr6	+	161194545	161231760	MSTRG.192231.2	2	37072	MSTRG.192231	AGPAT4	0.00277223	-8.49474	1.69244e-16	7.53565e-14	down	yes
40754	u	chr1	-	125178693	125183257	MSTRG.22508.7	3	1120	MSTRG.22508	.	0.000212046	-12.2033	1.69257e-16	7.53565e-14	down	yes
63732	u	chr10	-	41910276	41915973	MSTRG.34235.6	3	750	MSTRG.34235	.	0.000149741	-12.7052	1.80056e-16	7.91726e-14	down	yes
23161	o	chr1	+	16740516	16897805	MSTRG.13634.7	2	1949	MSTRG.13634	CROCCP4	0.000193257	-12.3372	1.81694e-16	7.97135e-14	down	yes
9307	i	X	+	74218737	74233703	MSTRG.6355.2	2	14943	MSTRG.6355	FTX	1206.93	10.2371	1.82382e-16	7.99252e-14	up	yes
275850	i	chr21	-	16438110	16484082	MSTRG.132645.2	2	45914	MSTRG.132645	MIR99AHG	387.947	8.59972	1.85042e-16	8.07291e-14	up	yes
344989	u	chr5	+	49601222	49603056	MSTRG.169543.2	3	690	MSTRG.169543	.	0.000139548	-12.807	1.86467e-16	8.08995e-14	down	yes
185824	o	chr17	+	19061991	19188678	MSTRG.91176.5	2	752	MSTRG.91176	GRAPL	23957.8	14.5482	1.93165e-16	8.33428e-14	up	yes
82368	i	chr11	-	36165286	36170011	MSTRG.43799.1	2	4585	MSTRG.43799	LDLRAD3	0.000417591	-11.2256	1.94899e-16	8.3998e-14	down	yes
180205	o	chr16	+	89293676	89301272	MSTRG.89410.2	2	7003	MSTRG.89410	AC137932	3089.43	11.5931	2.01016e-16	8.60651e-14	up	yes
19528	o	chr1	-	10001	180998	MSTRG.12314.6	5	345	MSTRG.12314	WASH7P	7.26968e-05	-13.7477	2.22855e-16	9.42799e-14	down	yes
263631	u	chr2	-	240639987	240641053	MSTRG.126174.2	3	637	MSTRG.126174	.	0.000135228	-12.8523	2.26397e-16	9.53655e-14	down	yes
206701	i	chr18	+	48284845	48314420	MSTRG.99726.2	2	29489	MSTRG.99726	ZBTB7C	595.275	9.21741	2.35879e-16	9.83495e-14	up	yes
99376	u	chr12	-	10001	10590	MSTRG.51355.4	3	374	MSTRG.51355	.	8.22938e-05	-13.5689	2.58842e-16	1.05728e-13	down	yes
293261	u	chr3	.	35326525	35326831	MSTRG.140228.1	1	307	MSTRG.140228	.	6.79194e-05	-13.8458	2.68281e-16	1.08708e-13	down	yes
283453	i	chr22	+	29120005	29120598	MSTRG.135638.4	5	256	MSTRG.135638	KREMEN1	5.7181e-05	-14.0941	2.68521e-16	1.08708e-13	down	yes
275746	o	chr21	+	16075494	16078536	MSTRG.132628.57	2	2788	MSTRG.132628	MIR99AHG	0.000476916	-11.034	2.89275e-16	1.15386e-13	down	yes
74592	u	chr10	.	123653818	123654064	MSTRG.40158.1	1	247	MSTRG.40158	.	5.59861e-05	-14.1246	2.94485e-16	1.16868e-13	down	yes
68196	o	chr10	+	77364081	77382632	MSTRG.36769.9	2	18471	MSTRG.36769	KCNMA1-AS3	920.226	9.84584	2.95555e-16	1.17055e-13	up	yes
188621	i	chr17	+	35042370	35064248	MSTRG.92372.2	2	21522	MSTRG.92372	RFFL	766.674	9.58247	3.22622e-16	1.25987e-13	up	yes
283457	i	chr22	+	29120005	29120598	MSTRG.135638.8	6	314	MSTRG.135638	KREMEN1	7.46347e-05	-13.7098	3.44321e-16	1.32124e-13	down	yes
419185	u	chr8	-	73149099	73150111	MSTRG.210202.2	2	629	MSTRG.210202	.	0.000148204	-12.7201	3.44757e-16	1.32124e-13	down	yes
87249	x	chr11	+	64819755	64874295	MSTRG.45773.1	2	507	MSTRG.45773	CDC42BPG	0.000121357	-13.0085	3.59922e-16	1.37263e-13	down	yes
400617	j	chr7	+	100149004	100154212	MSTRG.200382.9	4	581	MSTRG.200382	LAMTOR4	0.000105026	-13.217	3.61041e-16	1.37555e-13	down	yes
163867	o	chr16	-	1307444	1309413	MSTRG.82780.3	3	1818	MSTRG.82780	AC120498	0.000436815	-11.1607	3.61557e-16	1.37618e-13	down	yes
99375	u	chr12	-	10001	10590	MSTRG.51355.3	2	325	MSTRG.51355	.	7.24693e-05	-13.7523	3.80924e-16	1.43453e-13	down	yes
286246	i	chr22	-	40501740	40518793	MSTRG.136804.2	2	16976	MSTRG.136804	MRTFA	0.00418368	-7.90101	4.05122e-16	1.5025e-13	down	yes
87692	j	chr11	+	65502729	65506516	MSTRG.45867.16	3	2065	MSTRG.45867	MALAT1	12123.5	13.5655	4.10167e-16	1.51689e-13	up	yes
279344	i	chr21	.	42435548	42435775	MSTRG.133941.1	1	228	MSTRG.133941	UBASH3A	5.66291e-05	-14.1081	4.14851e-16	1.52684e-13	down	yes
23162	o	chr1	+	16740516	16897805	MSTRG.13634.8	2	1950	MSTRG.13634	CROCCP4	0.000193161	-12.3379	4.15592e-16	1.52684e-13	down	yes
309831	i	chr3	-	152353782	152390130	MSTRG.148699.2	2	36272	MSTRG.148699	MBNL1	416.045	8.7006	4.50749e-16	1.63348e-13	up	yes
288405	u	chr3	-	10001	10916	MSTRG.137644.7	7	530	MSTRG.137644	.	0.000119411	-13.0318	4.52535e-16	1.63491e-13	down	yes
349191	i	chr5	+	81714186	81750219	MSTRG.171892.4	2	32844	MSTRG.171892	SSBP2	0.00341586	-8.19354	5.06413e-16	1.79081e-13	down	yes
286515	o	chr22	-	41598527	41600892	MSTRG.136915.4	2	1865	MSTRG.136915	DESI1	0.00042541	-11.1989	5.18718e-16	1.82182e-13	down	yes
420856	i	chr8	.	86227237	86227496	MSTRG.211271.1	1	260	MSTRG.211271	SLC7A13	6.93029e-05	-13.8167	5.36775e-16	1.86678e-13	down	yes
393547	u	chr7	.	46123900	46124103	MSTRG.196671.1	1	204	MSTRG.196671	.	5.45622e-05	-14.1617	5.47455e-16	1.89886e-13	down	yes
405267	i	chr7	+	131056071	131107239	MSTRG.202866.2	2	51128	MSTRG.202866	AC016831	442.877	8.79076	5.87396e-16	2.0124e-13	up	yes
283456	i	chr22	+	29120005	29120598	MSTRG.135638.7	6	343	MSTRG.135638	KREMEN1	9.42544e-05	-13.3731	5.91884e-16	2.02069e-13	down	yes
126504	j	chr13	-	50001357	50125720	MSTRG.64394.20	8	7252	MSTRG.64394	DLEU2	0.000789893	-10.3061	5.9948e-16	2.04483e-13	down	yes
435030	u	chr9	-	65207539	65211473	MSTRG.219574.7	3	1964	MSTRG.219574	.	0.000502732	-10.9579	6.06214e-16	2.0642e-13	down	yes
240263	j	chr2	-	70049226	70083573	MSTRG.113758.219	4	1244	MSTRG.113758	PCBP1-AS1	0.000296809	-11.7182	6.1178e-16	2.07369e-13	down	yes
180867	i	chr17	-	242222	244315	MSTRG.89540.15	4	1005	MSTRG.89540	RPH3AL	0.00027917	-11.8066	6.1905e-16	2.09353e-13	down	yes
144724	i	chr14	+	89325485	89331663	MSTRG.74797.2	2	6065	MSTRG.74797	FOXN3	2931.3	11.5173	6.19387e-16	2.09353e-13	up	yes
418065	i	chr8	-	63175752	63186145	MSTRG.209564.1	2	10344	MSTRG.209564	YTHDF3	0.00288913	-8.43515	6.82163e-16	2.25466e-13	down	yes
28355	j	chr1	-	41372647	41381504	MSTRG.15828.2	2	8117	MSTRG.15828	FOXO6-AS1	0.00114902	-9.76538	6.89701e-16	2.2675e-13	down	yes
182472	i	chr17	.	5905068	5905364	MSTRG.90017.1	1	297	MSTRG.90017	AC007846	8.48922e-05	-13.524	7.13624e-16	2.32658e-13	down	yes
303859	o	chr3	-	113260428	113268298	MSTRG.145555.5	2	7846	MSTRG.145555	AC026329	1669.04	10.7048	7.14751e-16	2.32831e-13	up	yes
355763	i	chr5	.	135731536	135731738	MSTRG.175925.1	1	203	MSTRG.175925	SLC25A48	5.83902e-05	-14.0639	7.30047e-16	2.36044e-13	down	yes
363622	i	chr6	+	1864209	1878312	MSTRG.179771.2	2	14041	MSTRG.179771	GMDS	1555.01	10.6027	7.89606e-16	2.50331e-13	up	yes
300800	u	chr3	.	83792578	83792792	MSTRG.143618.1	1	215	MSTRG.143618	.	6.26737e-05	-13.9618	7.94752e-16	2.51759e-13	down	yes
303856	o	chr3	-	113251892	113263503	MSTRG.145555.2	2	11583	MSTRG.145555	AC026329	0.0010861	-9.84663	8.00199e-16	2.53074e-13	down	yes
200295	u	chr17	+	81881594	81882425	MSTRG.96313.2	2	590	MSTRG.96313	.	0.000173654	-12.4915	8.14459e-16	2.57376e-13	down	yes
406542	u	chr7	.	140969376	140970464	MSTRG.203433.1	1	1089	MSTRG.203433	.	0.000324946	-11.5875	8.25814e-16	2.59479e-13	down	yes
316802	i	chr3	+	198173143	198174527	MSTRG.151945.4	4	390	MSTRG.151945	FAM157A	8.46953e-05	-13.5274	8.35029e-16	2.6155e-13	down	yes
420450	i	chr8	.	82506356	82506600	MSTRG.211064.1	1	245	MSTRG.211064	AC060765	7.37929e-05	-13.7262	8.50106e-16	2.65634e-13	down	yes
17535	i	X	.	152595079	152595842	MSTRG.11856.1	1	764	MSTRG.11856	AC244102	0.000232068	-12.0732	8.63239e-16	2.68878e-13	down	yes
364973	j	chr6	+	10723070	10758834	MSTRG.180412.2	8	3068	MSTRG.180412	TMEM14B	0.000512868	-10.9291	8.67082e-16	2.69645e-13	down	yes
4892	u	X	.	43897778	43898401	MSTRG.3450.1	1	624	MSTRG.3450	.	0.000192182	-12.3452	9.39813e-16	2.88817e-13	down	yes
266238	o	chr20	-	13227148	13259006	MSTRG.127382.2	2	31553	MSTRG.127382	ISM1-AS1	0.00667548	-7.22691	9.4551e-16	2.89657e-13	down	yes
328392	i	chr4	.	92817084	92817366	MSTRG.158907.1	1	283	MSTRG.158907	GRID2	8.73382e-05	-13.483	9.50937e-16	2.90762e-13	down	yes
261116	u	chr2	.	223384277	223384601	MSTRG.124928.1	1	325	MSTRG.124928	.	0.000100959	-13.2739	9.73693e-16	2.96663e-13	down	yes
354264	i	chr5	.	125785495	125785823	MSTRG.175147.1	1	329	MSTRG.175147	AC116362	0.000102043	-13.2585	9.81293e-16	2.97587e-13	down	yes
60295	i	chr10	-	12435283	12454394	MSTRG.32221.11	2	17682	MSTRG.32221	CAMK1D	732.242	9.51618	1.01142e-15	3.05067e-13	up	yes
274902	i	chr21	+	8395760	8396931	MSTRG.131490.25	2	978	MSTRG.131490	FP236383	0.000131501	-12.8926	1.02042e-15	3.06707e-13	down	yes
316804	i	chr3	+	198173143	198174527	MSTRG.151945.6	5	392	MSTRG.151945	FAM157A	0.000124737	-12.9688	1.02324e-15	3.0721e-13	down	yes
382738	u	chr6	.	139919826	139920145	MSTRG.190623.1	1	320	MSTRG.190623	.	9.07092e-05	-13.4284	1.04417e-15	3.11818e-13	down	yes
385621	i	chr6	-	163503236	163511334	MSTRG.192329.2	2	8009	MSTRG.192329	QKI	0.00114361	-9.77219	1.07056e-15	3.18238e-13	down	yes
325223	u	chr4	.	69658990	69659844	MSTRG.157224.1	1	855	MSTRG.157224	.	0.000275689	-11.8247	1.08546e-15	3.20961e-13	down	yes
151881	j	chr15	-	40686267	40695160	MSTRG.77909.4	3	8619	MSTRG.77909	RAD51-AS1	2387.06	11.221	1.12265e-15	3.30354e-13	up	yes
84310	i	chr11	.	49578151	49578574	MSTRG.44746.1	1	424	MSTRG.44746	AC136759	0.000137029	-12.8332	1.12315e-15	3.30354e-13	down	yes
350661	u	chr5	.	93229705	93230211	MSTRG.172817.1	1	507	MSTRG.172817	.	0.000164511	-12.5695	1.14023e-15	3.34372e-13	down	yes
339721	o	chr4	+	190122453	190182296	MSTRG.166233.2	5	288	MSTRG.166233	DUX4	9.4803e-05	-13.3647	1.16677e-15	3.40727e-13	down	yes
393951	i	chr7	.	50048795	50049547	MSTRG.196983.1	1	753	MSTRG.196983	ZPBP	0.000251187	-11.9589	1.22039e-15	3.53896e-13	down	yes
79340	u	chr11	.	13919204	13919448	MSTRG.42105.1	1	245	MSTRG.42105	.	8.15755e-05	-13.5815	1.24152e-15	3.58694e-13	down	yes
167714	o	chr16	+	17402497	17421659	MSTRG.84123.3	2	19019	MSTRG.84123	AC009152	0.00284381	-8.45796	1.25532e-15	3.61346e-13	down	yes
323083	u	chr4	+	49145743	49146864	MSTRG.155712.1	2	734	MSTRG.155712	.	0.000237984	-12.0368	1.3262e-15	3.79234e-13	down	yes
344991	u	chr5	+	49601499	49603056	MSTRG.169543.4	3	723	MSTRG.169543	.	0.000241648	-12.0148	1.3487e-15	3.83424e-13	down	yes
435031	u	chr9	-	65207539	65211473	MSTRG.219574.8	3	1957	MSTRG.219574	.	0.00066936	-10.5449	1.35046e-15	3.83647e-13	down	yes
23186	j	chr1	+	16872592	16874092	MSTRG.13640.9	3	759	MSTRG.13640	BX284668	0.000142147	-12.7803	1.36592e-15	3.86458e-13	down	yes
288406	u	chr3	-	10001	10916	MSTRG.137644.8	6	483	MSTRG.137644	.	0.000162021	-12.5915	1.38389e-15	3.9087e-13	down	yes
177241	i	chr16	+	72981906	73014256	MSTRG.88008.1	2	24296	MSTRG.88008	ZFHX3	408.562	8.67441	1.38664e-15	3.91366e-13	up	yes
328308	u	chr4	.	91648501	91648842	MSTRG.158683.1	1	342	MSTRG.158683	.	0.000112969	-13.1118	1.41626e-15	3.97646e-13	down	yes
147005	u	chr14	-	101607362	101608219	MSTRG.75748.3	3	804	MSTRG.75748	.	0.000278196	-11.8116	1.41703e-15	3.97646e-13	down	yes
418067	i	chr8	-	63179759	63182983	MSTRG.209564.2	2	3099	MSTRG.209564	YTHDF3	0.00107973	-9.85512	1.41892e-15	3.97889e-13	down	yes
220568	u	chr19	.	34984639	34985697	MSTRG.105515.1	1	1059	MSTRG.105515	.	0.000366342	-11.4145	1.42433e-15	3.99121e-13	down	yes
124387	u	chr13	.	34753598	34754985	MSTRG.63178.1	1	1388	MSTRG.63178	.	0.000482767	-11.0164	1.43534e-15	4.01343e-13	down	yes
19526	o	chr1	-	10001	180998	MSTRG.12314.4	6	344	MSTRG.12314	WASH7P	0.000119658	-13.0288	1.43534e-15	4.01343e-13	down	yes
21804	i	chr1	-	9313672	9330158	MSTRG.13017.8	2	16227	MSTRG.13017	SPSB1	0.00218878	-8.83566	1.49843e-15	4.16306e-13	down	yes
201689	i	chr18	.	3851865	3852191	MSTRG.96788.1	1	327	MSTRG.96788	DLGAP1	0.000114388	-13.0938	1.49844e-15	4.16306e-13	down	yes
278684	x	chr21	+	38529702	38539161	MSTRG.133637.4	2	9417	MSTRG.133637	ERG	0.00332776	-8.23123	1.51912e-15	4.2107e-13	down	yes
390290	j	chr7	-	25588264	25751032	MSTRG.194989.7	4	8768	MSTRG.194989	AC005165	0.00202111	-8.95064	1.54998e-15	4.27785e-13	down	yes
342443	u	chr5	.	24419865	24421173	MSTRG.167947.1	1	1309	MSTRG.167947	.	0.000469857	-11.0555	1.58928e-15	4.36006e-13	down	yes
180211	o	chr16	+	89296029	89300052	MSTRG.89410.8	2	3520	MSTRG.89410	AC137932	2802.83	11.4527	1.59977e-15	4.38537e-13	up	yes
201034	o	chr18	-	10001	105474	MSTRG.96459.1	2	373	MSTRG.96459	IL9RP4	0.000134184	-12.8635	1.61549e-15	4.41916e-13	down	yes
358931	j	chr5	-	151741071	151758779	MSTRG.177342.1	4	3317	MSTRG.177342	ATOX1	0.000666828	-10.5504	1.64703e-15	4.49286e-13	down	yes
426967	i	chr8	.	131027799	131028075	MSTRG.215023.1	1	277	MSTRG.215023	ADCY8	0.000100535	-13.28	1.67072e-15	4.54479e-13	down	yes
419184	u	chr8	-	73149099	73150111	MSTRG.210202.1	3	341	MSTRG.210202	.	0.000123533	-12.9828	1.67072e-15	4.54479e-13	down	yes
412799	u	chr8	.	23180808	23181085	MSTRG.206603.1	1	278	MSTRG.206603	.	0.000100606	-13.279	1.67424e-15	4.5512e-13	down	yes
411995	i	chr8	+	18782413	18799138	MSTRG.206360.2	3	15655	MSTRG.206360	PSD3	576.895	9.17216	1.69162e-15	4.5857e-13	up	yes
361948	o	chr5	+	176443703	176481817	MSTRG.179199.1	2	412	MSTRG.179199	FAF2	0.000150444	-12.6985	1.69989e-15	4.59836e-13	down	yes
373351	u	chr6	.	62894400	62894988	MSTRG.184448.1	1	589	MSTRG.184448	.	0.000215083	-12.1828	1.69989e-15	4.59836e-13	down	yes
9308	i	X	+	74218737	74233703	MSTRG.6355.3	2	14939	MSTRG.6355	FTX	909.715	9.82927	1.70441e-15	4.60123e-13	up	yes
238113	u	chr2	.	56700149	56700603	MSTRG.112498.1	1	455	MSTRG.112498	.	0.000164581	-12.5689	1.71412e-15	4.61786e-13	down	yes
112474	u	chr12	-	69200237	69201004	MSTRG.57092.3	3	533	MSTRG.57092	.	9.84204e-05	-13.3107	1.73066e-15	4.64842e-13	down	yes
343632	i	chr5	.	35775282	35775766	MSTRG.168764.1	1	485	MSTRG.168764	SPEF2	0.000177222	-12.4622	1.76863e-15	4.72886e-13	down	yes
235122	i	chr2	.	34423411	34423799	MSTRG.111023.1	1	389	MSTRG.111023	LINC01320	0.000140539	-12.7967	1.7872e-15	4.76441e-13	down	yes
239826	u	chr2	.	68439806	68440299	MSTRG.113586.1	1	494	MSTRG.113586	.	0.000182213	-12.4221	1.80481e-15	4.8026e-13	down	yes
13326	u	X	.	113487280	113487951	MSTRG.8905.1	1	672	MSTRG.8905	.	0.000250522	-11.9628	1.85459e-15	4.92503e-13	down	yes
333299	u	chr4	.	135055401	135055674	MSTRG.162110.1	1	274	MSTRG.162110	.	0.000102321	-13.2546	1.87092e-15	4.96164e-13	down	yes
418272	u	chr8	.	65506404	65507164	MSTRG.209688.1	1	761	MSTRG.209688	.	0.000284285	-11.7804	1.93462e-15	5.08914e-13	down	yes
50369	u	chr1	.	196975890	196976144	MSTRG.26872.1	1	255	MSTRG.26872	.	9.10042e-05	-13.4237	1.95984e-15	5.14385e-13	down	yes
162601	u	chr15	.	99463158	99463482	MSTRG.82395.1	1	325	MSTRG.82395	.	0.000122745	-12.9921	1.96046e-15	5.14385e-13	down	yes
286107	i	chr22	.	39769323	39770089	MSTRG.136722.1	1	767	MSTRG.136722	ENTHD1	0.000289225	-11.7555	1.96068e-15	5.14385e-13	down	yes
316799	i	chr3	+	198172694	198174527	MSTRG.151945.1	4	339	MSTRG.151945	FAM157A	0.000127301	-12.9395	1.96412e-15	5.14943e-13	down	yes
384057	u	chr6	.	150545929	150546171	MSTRG.191506.1	1	243	MSTRG.191506	.	9.25859e-05	-13.3988	1.98565e-15	5.18499e-13	down	yes
104013	i	chr12	+	24298821	24323448	MSTRG.53492.24	2	24342	MSTRG.53492	SOX5	0.00390017	-8.00225	2.00435e-15	5.23034e-13	down	yes
301640	i	chr3	.	96835462	96835825	MSTRG.144327.1	1	364	MSTRG.144327	EPHA6	0.000139496	-12.8075	2.01881e-15	5.26105e-13	down	yes
81743	i	chr11	.	31833912	31834446	MSTRG.43605.1	1	535	MSTRG.43605	AL035078	0.000203642	-12.2617	2.04267e-15	5.30608e-13	down	yes
163073	u	chr15	+	101980515	101981163	MSTRG.82589.3	3	544	MSTRG.82589	.	0.000208929	-12.2247	2.05266e-15	5.32362e-13	down	yes
78483	o	chr11	+	8776671	8806603	MSTRG.41735.3	2	29525	MSTRG.41735	AC026894	492.496	8.94397	2.05508e-15	5.32362e-13	up	yes
299158	u	chr3	.	67140675	67140982	MSTRG.142527.1	1	308	MSTRG.142527	.	0.000117987	-13.0491	2.06683e-15	5.35052e-13	down	yes
303221	i	chr3	.	108425488	108425906	MSTRG.145126.1	1	419	MSTRG.145126	MYH15	0.000159361	-12.6154	2.08224e-15	5.38025e-13	down	yes
180864	i	chr17	-	242222	244315	MSTRG.89540.12	3	306	MSTRG.89540	RPH3AL	0.000113442	-13.1058	2.08245e-15	5.38025e-13	down	yes
275028	u	chr21	.	9165146	9166046	MSTRG.131524.1	1	901	MSTRG.131524	.	0.000351452	-11.4744	2.15849e-15	5.55105e-13	down	yes
7909	u	X	.	64731610	64732602	MSTRG.5104.1	1	993	MSTRG.5104	.	0.00038722	-11.3346	2.15849e-15	5.55105e-13	down	yes
154588	i	chr15	.	54406841	54407483	MSTRG.79086.1	1	643	MSTRG.79086	UNC13C	0.000249025	-11.9714	2.20063e-15	5.63449e-13	down	yes
63423	u	chr10	.	37079942	37080433	MSTRG.33997.1	1	492	MSTRG.33997	.	0.00019179	-12.3482	2.23903e-15	5.72053e-13	down	yes
418148	i	chr8	.	64006286	64006566	MSTRG.209605.1	1	281	MSTRG.209605	LINC01414	0.000110446	-13.1444	2.27729e-15	5.79308e-13	down	yes
352190	u	chr5	.	106716595	106716877	MSTRG.173782.1	1	283	MSTRG.173782	.	0.000112465	-13.1182	2.30995e-15	5.85961e-13	down	yes
64239	i	chr10	.	45029648	45029963	MSTRG.34543.1	1	316	MSTRG.34543	AL358394	0.000123356	-12.9849	2.34266e-15	5.91188e-13	down	yes
384375	u	chr6	.	152944228	152944668	MSTRG.191611.1	1	441	MSTRG.191611	.	0.000176011	-12.472	2.34984e-15	5.91854e-13	down	yes
384693	u	chr6	.	155478001	155478774	MSTRG.191771.1	1	774	MSTRG.191771	.	0.000308166	-11.664	2.34984e-15	5.91854e-13	down	yes
407596	i	chr7	.	147645868	147646229	MSTRG.204024.1	1	362	MSTRG.204024	CNTNAP2	0.000143943	-12.7622	2.352e-15	5.92017e-13	down	yes
275227	i	chr21	.	10447752	10449004	MSTRG.131733.1	1	1253	MSTRG.131733	BAGE2	0.000504416	-10.9531	2.43222e-15	6.0736e-13	down	yes
51504	u	chr1	.	203986200	203986567	MSTRG.27412.1	1	368	MSTRG.27412	.	0.000147855	-12.7235	2.43222e-15	6.0736e-13	down	yes
68954	u	chr10	.	83890020	83890470	MSTRG.37128.1	1	451	MSTRG.37128	.	0.00018264	-12.4187	2.47476e-15	6.13436e-13	down	yes
146937	u	chr14	-	101130474	101130790	MSTRG.75699.2	2	263	MSTRG.75699	.	0.000106271	-13.2	2.47476e-15	6.13436e-13	down	yes
278993	i	chr21	.	40180420	40180718	MSTRG.133784.1	1	299	MSTRG.133784	DSCAM	0.000121185	-13.0105	2.51823e-15	6.20668e-13	down	yes
146211	i	chr14	.	98071098	98071387	MSTRG.75462.1	1	290	MSTRG.75462	AL163932	0.00011762	-13.0536	2.51823e-15	6.20668e-13	down	yes
249712	i	chr2	.	141072949	141073183	MSTRG.118752.1	1	235	MSTRG.118752	LRP1B	9.55553e-05	-13.3533	2.51823e-15	6.20668e-13	down	yes
331862	u	chr4	.	121094735	121095134	MSTRG.161165.1	1	400	MSTRG.161165	.	0.000155003	-12.6554	2.53127e-15	6.23096e-13	down	yes
137907	i	chr14	.	44153119	44153808	MSTRG.71142.1	1	690	MSTRG.71142	LINC02307	0.00027706	-11.8175	2.62176e-15	6.42158e-13	down	yes
246871	u	chr2	.	117284669	117284988	MSTRG.116874.1	1	320	MSTRG.116874	.	0.000130118	-12.9079	2.66098e-15	6.48898e-13	down	yes
7496	u	X	.	57944674	57945361	MSTRG.4905.1	1	688	MSTRG.4905	.	0.000282525	-11.7893	2.66819e-15	6.49844e-13	down	yes
127725	u	chr13	.	61208691	61209186	MSTRG.65054.1	1	496	MSTRG.65054	.	0.000198901	-12.2957	2.68766e-15	6.54178e-13	down	yes
184527	i	chr17	.	14852314	14853432	MSTRG.90789.1	1	1119	MSTRG.90789	LINC02096	0.000460195	-11.0855	2.711e-15	6.5863e-13	down	yes
247632	i	chr2	.	124088734	124089268	MSTRG.117358.1	1	535	MSTRG.117358	CNTNAP5	0.00022069	-12.1457	2.711e-15	6.5863e-13	down	yes
368259	i	chr6	-	31415380	31427037	MSTRG.182111.1	2	11600	MSTRG.182111	AL645933	0.00263605	-8.56741	2.73528e-15	6.63704e-13	down	yes
331207	i	chr4	.	116114935	116115456	MSTRG.160749.1	1	522	MSTRG.160749	AC027613	0.000214293	-12.1881	2.7396e-15	6.64339e-13	down	yes
288402	u	chr3	-	10001	10916	MSTRG.137644.4	5	325	MSTRG.137644	.	0.000134965	-12.8551	2.79549e-15	6.73298e-13	down	yes
372524	u	chr6	.	53227557	53227803	MSTRG.183909.1	1	247	MSTRG.183909	.	0.000102354	-13.2541	2.80439e-15	6.75025e-13	down	yes
370348	i	chr6	+	38527310	38534473	MSTRG.182753.2	2	7027	MSTRG.182753	BTBD9	0.00115649	-9.75603	2.81525e-15	6.76237e-13	down	yes
396029	i	chr7	-	70440472	70479026	MSTRG.198332.2	2	20502	MSTRG.198332	AUTS2	486.551	8.92645	2.82172e-15	6.76852e-13	up	yes
311221	u	chr3	.	164091170	164091397	MSTRG.149362.1	1	228	MSTRG.149362	.	9.48827e-05	-13.3635	2.82236e-15	6.76852e-13	down	yes
305280	u	chr3	.	123028648	123029010	MSTRG.146314.1	1	363	MSTRG.146314	.	0.000151799	-12.6855	2.83653e-15	6.79414e-13	down	yes
207723	i	chr18	.	56118850	56119154	MSTRG.100182.1	1	305	MSTRG.100182	AC006305	0.000127806	-12.9338	2.87443e-15	6.87231e-13	down	yes
379389	u	chr6	.	112452045	112452288	MSTRG.188580.1	1	244	MSTRG.188580	.	0.000102351	-13.2542	2.87664e-15	6.87338e-13	down	yes
353768	u	chr5	.	121695278	121695699	MSTRG.174798.1	1	422	MSTRG.174798	.	0.000176334	-12.4694	2.91235e-15	6.94598e-13	down	yes
324567	u	chr4	.	63274023	63274692	MSTRG.156745.1	1	670	MSTRG.156745	.	0.00028358	-11.784	2.91679e-15	6.94808e-13	down	yes
291838	u	chr3	.	22748320	22748931	MSTRG.139409.1	1	612	MSTRG.139409	.	0.000258415	-11.918	2.91679e-15	6.94808e-13	down	yes
161996	i	chr15	.	94512630	94513308	MSTRG.82034.1	1	679	MSTRG.82034	AC009432	0.00028493	-11.7771	2.92582e-15	6.95686e-13	down	yes
366333	i	chr6	.	22630842	22631258	MSTRG.181365.1	1	417	MSTRG.181365	CASC15	0.000176884	-12.4649	2.96006e-15	7.00844e-13	down	yes
85204	i	chr11	.	59055871	59056332	MSTRG.45175.1	1	462	MSTRG.45175	AP001636	0.000196599	-12.3125	2.96006e-15	7.00844e-13	down	yes
288404	u	chr3	-	10001	10916	MSTRG.137644.6	6	474	MSTRG.137644	.	0.000200744	-12.2824	2.96006e-15	7.00844e-13	down	yes
350559	u	chr5	.	91907473	91908223	MSTRG.172565.1	1	751	MSTRG.172565	.	0.000318836	-11.6149	2.96006e-15	7.00844e-13	down	yes
135611	i	chr14	.	25700399	25700784	MSTRG.69648.1	1	386	MSTRG.69648	LINC02306	0.000163709	-12.5766	2.98921e-15	7.06798e-13	down	yes
346110	i	chr5	+	59127675	59171752	MSTRG.170352.2	2	44058	MSTRG.170352	PDE4D	202.632	7.66272	2.99821e-15	7.07732e-13	up	yes
105517	u	chr12	.	38624939	38625590	MSTRG.54178.1	1	652	MSTRG.54178	.	0.000277859	-11.8134	3.01353e-15	7.09635e-13	down	yes
146664	i	chr14	.	100785204	100786240	MSTRG.75787.1	1	1037	MSTRG.75787	MEG3	0.000442376	-11.1424	3.01353e-15	7.09635e-13	down	yes
10927	u	X	.	90418657	90419304	MSTRG.7288.1	1	648	MSTRG.7288	.	0.000276118	-11.8224	3.01353e-15	7.09635e-13	down	yes
105755	u	chr12	.	40653246	40653779	MSTRG.54332.1	1	534	MSTRG.54332	.	0.000227299	-12.1031	3.01353e-15	7.09635e-13	down	yes
352285	i	chr5	-	107592142	107637602	MSTRG.173861.2	2	34810	MSTRG.173861	EFNA5	252.468	7.97995	3.06079e-15	7.18599e-13	up	yes
404162	i	chr7	.	124378792	124379402	MSTRG.202182.1	1	611	MSTRG.202182	AC006148	0.000259393	-11.9126	3.12781e-15	7.30723e-13	down	yes
43285	u	chr1	.	153367980	153368192	MSTRG.23340.1	1	213	MSTRG.23340	.	8.93387e-05	-13.4504	3.15638e-15	7.35739e-13	down	yes
308910	u	chr3	.	146369468	146369978	MSTRG.148047.1	1	511	MSTRG.148047	.	0.0002203	-12.1482	3.181e-15	7.39713e-13	down	yes
246680	i	chr2	.	114947929	114948147	MSTRG.116775.1	1	219	MSTRG.116775	DPP10	9.44015e-05	-13.3708	3.181e-15	7.39713e-13	down	yes
180868	i	chr17	-	242222	244315	MSTRG.89540.2	3	340	MSTRG.89540	RPH3AL	0.000146267	-12.7391	3.181e-15	7.39713e-13	down	yes
441519	u	chr9	.	118738911	118739185	MSTRG.223445.1	1	275	MSTRG.223445	.	0.000118056	-13.0482	3.20188e-15	7.43689e-13	down	yes
356315	i	chr5	-	138776100	138777875	MSTRG.176181.4	2	1678	MSTRG.176181	CTNNA1	0.000390447	-11.3226	3.2019e-15	7.43689e-13	down	yes
4866	u	X	.	43465626	43466106	MSTRG.3418.1	1	481	MSTRG.3418	.	0.000208281	-12.2292	3.21836e-15	7.46183e-13	down	yes
82929	u	chr11	.	42825796	42826151	MSTRG.44262.1	1	356	MSTRG.44262	.	0.000154437	-12.6607	3.21836e-15	7.46183e-13	down	yes
80650	i	chr11	.	23171697	23172162	MSTRG.42823.1	1	466	MSTRG.42823	LINC02718	0.000235578	-12.0515	3.24504e-15	7.51476e-13	down	yes
74072	u	chr10	.	120080408	120080699	MSTRG.39899.1	1	292	MSTRG.39899	.	0.000126932	-12.9437	3.26181e-15	7.54913e-13	down	yes
284947	i	chr22	+	35849451	35875794	MSTRG.136302.2	2	26182	MSTRG.136302	RBFOX2	376.728	8.55738	3.27378e-15	7.5634e-13	up	yes
206718	u	chr18	.	48498535	48499169	MSTRG.99717.1	1	635	MSTRG.99717	.	0.000277203	-11.8168	3.31394e-15	7.6112e-13	down	yes
129410	u	chr13	.	79215343	79215777	MSTRG.66313.1	1	435	MSTRG.66313	.	0.000190207	-12.3601	3.31394e-15	7.6112e-13	down	yes
272774	u	chr20	.	55295779	55296582	MSTRG.130536.1	1	804	MSTRG.130536	.	0.000352473	-11.4702	3.31394e-15	7.6112e-13	down	yes
3967	i	X	.	35930910	35931629	MSTRG.2837.1	1	720	MSTRG.2837	CFAP47	0.000314934	-11.6327	3.31394e-15	7.6112e-13	down	yes
258200	i	chr2	+	203506937	203534782	MSTRG.123491.3	2	7959	MSTRG.123491	RAPH1	1078.27	10.0745	3.34691e-15	7.68241e-13	up	yes
300806	u	chr3	.	83882859	83883072	MSTRG.143624.1	1	214	MSTRG.143624	.	9.05089e-05	-13.4316	3.37446e-15	7.72573e-13	down	yes
321332	i	chr4	.	34189568	34190385	MSTRG.154670.1	1	818	MSTRG.154670	LINC02484	0.000359079	-11.4434	3.37567e-15	7.72573e-13	down	yes
54324	i	chr1	+	222487809	222488933	MSTRG.29052.2	2	694	MSTRG.29052	AL513314	0.000305756	-11.6753	3.37567e-15	7.72573e-13	down	yes
84473	u	chr11	.	55338242	55338502	MSTRG.44865.1	1	261	MSTRG.44865	.	0.000115229	-13.0832	3.44551e-15	7.84881e-13	down	yes
205605	u	chr18	.	39068793	39069113	MSTRG.98827.1	1	321	MSTRG.98827	.	0.000141531	-12.7866	3.48078e-15	7.92455e-13	down	yes
230279	u	chr2	.	709754	710143	MSTRG.108353.1	1	390	MSTRG.108353	.	0.000172274	-12.503	3.49e-15	7.93628e-13	down	yes
342966	i	chr5	.	30671695	30671951	MSTRG.168384.1	1	257	MSTRG.168384	AC099517	0.000112672	-13.1156	3.49987e-15	7.94948e-13	down	yes
37756	u	chr1	.	104442922	104443521	MSTRG.20975.1	1	600	MSTRG.20975	.	0.000267131	-11.8702	3.5175e-15	7.97563e-13	down	yes
32752	u	chr1	.	65780483	65780692	MSTRG.17858.1	1	210	MSTRG.17858	.	9.31321e-05	-13.3904	3.5175e-15	7.97563e-13	down	yes
153406	u	chr15	.	46391377	46392112	MSTRG.78407.1	1	736	MSTRG.78407	.	0.000326338	-11.5813	3.5175e-15	7.97563e-13	down	yes
299329	u	chr3	.	68660403	68660713	MSTRG.142579.1	1	311	MSTRG.142579	.	0.000138069	-12.8223	3.54305e-15	8.01033e-13	down	yes
93581	u	chr11	.	97453293	97453982	MSTRG.48439.1	1	690	MSTRG.48439	.	0.000307931	-11.6651	3.59138e-15	8.08219e-13	down	yes
394897	i	chr7	.	57456922	57457339	MSTRG.197511.1	1	418	MSTRG.197511	ZNF716	0.000187211	-12.383	3.59138e-15	8.08219e-13	down	yes
46588	u	chr1	.	165462430	165462754	MSTRG.24491.1	1	325	MSTRG.24491	.	0.000146226	-12.7395	3.66689e-15	8.21431e-13	down	yes
186633	u	chr17	.	22455813	22456637	MSTRG.91523.1	1	825	MSTRG.91523	.	0.000369651	-11.4015	3.66689e-15	8.21431e-13	down	yes
167723	u	chr16	.	17524248	17524680	MSTRG.84081.1	1	433	MSTRG.84081	.	0.000194694	-12.3265	3.66689e-15	8.21431e-13	down	yes
66905	u	chr10	.	69768885	69769627	MSTRG.36183.1	1	743	MSTRG.36183	.	0.000333308	-11.5509	3.66689e-15	8.21431e-13	down	yes
57217	u	chr1	.	240709475	240709987	MSTRG.30480.1	1	513	MSTRG.30480	.	0.000227852	-12.0996	3.7104e-15	8.28801e-13	down	yes
82781	i	chr11	.	40973545	40974340	MSTRG.44145.1	1	796	MSTRG.44145	LRRC4C	0.000360325	-11.4384	3.74383e-15	8.33412e-13	down	yes
420540	u	chr8	.	83909816	83910657	MSTRG.211116.1	1	842	MSTRG.211116	.	0.000380285	-11.3606	3.74383e-15	8.33412e-13	down	yes
213968	i	chr19	.	8867366	8867745	MSTRG.103062.1	1	380	MSTRG.103062	MUC16	0.000171941	-12.5058	3.74383e-15	8.33412e-13	down	yes
11522	u	X	.	99628786	99629183	MSTRG.7827.1	1	398	MSTRG.7827	.	0.000180048	-12.4393	3.74383e-15	8.33412e-13	down	yes
259110	u	chr2	.	211310036	211310985	MSTRG.123900.1	1	950	MSTRG.123900	.	0.000426149	-11.1964	3.7596e-15	8.35494e-13	down	yes
50255	u	chr1	.	195514052	195514324	MSTRG.26826.1	1	273	MSTRG.26826	.	0.000123391	-12.9845	3.77733e-15	8.38006e-13	down	yes
148181	u	chr14	.	105553521	105553782	MSTRG.76168.1	1	262	MSTRG.76168	.	0.000118372	-13.0444	3.77733e-15	8.38006e-13	down	yes
252846	i	chr2	.	167026725	167027378	MSTRG.120523.1	1	654	MSTRG.120523	XIRP2	0.000296246	-11.7209	3.77733e-15	8.38006e-13	down	yes
225635	i	chr19	.	47823915	47824392	MSTRG.107079.1	1	478	MSTRG.107079	CRX	0.000216361	-12.1743	3.78488e-15	8.39204e-13	down	yes
128392	u	chr13	.	69352471	69352751	MSTRG.65682.1	1	281	MSTRG.65682	.	0.000125282	-12.9625	3.7899e-15	8.39365e-13	down	yes
430539	i	chr9	.	10118430	10119076	MSTRG.216848.1	1	647	MSTRG.216848	PTPRD	0.000283691	-11.7834	3.79385e-15	8.39765e-13	down	yes
302510	u	chr3	.	103788651	103789145	MSTRG.144800.1	1	495	MSTRG.144800	.	0.000224613	-12.1203	3.82208e-15	8.43149e-13	down	yes
322430	i	chr4	.	43204119	43204878	MSTRG.155276.1	1	760	MSTRG.155276	AC111198	0.000345179	-11.5004	3.82208e-15	8.43149e-13	down	yes
292453	u	chr3	.	28226041	28226342	MSTRG.139731.1	1	302	MSTRG.139731	.	0.000137232	-12.8311	3.82208e-15	8.43149e-13	down	yes
288407	u	chr3	-	10001	10916	MSTRG.137644.9	7	287	MSTRG.137644	.	0.000130526	-12.9034	3.82208e-15	8.43149e-13	down	yes
99377	u	chr12	-	10001	10590	MSTRG.51355.5	3	381	MSTRG.51355	.	0.000172979	-12.4971	3.82208e-15	8.43149e-13	down	yes
430166	u	chr9	.	6215174	6215610	MSTRG.216383.1	1	437	MSTRG.216383	.	0.000195719	-12.3189	3.85008e-15	8.47892e-13	down	yes
93466	i	chr11	+	96206317	96245269	MSTRG.48350.7	2	38887	MSTRG.48350	MAML2	212.938	7.73429	3.86431e-15	8.50545e-13	up	yes
316803	i	chr3	+	198173143	198174527	MSTRG.151945.5	4	350	MSTRG.151945	FAM157A	0.000159458	-12.6145	3.90161e-15	8.55382e-13	down	yes
28055	u	chr1	.	40006069	40006697	MSTRG.15666.1	1	629	MSTRG.15666	.	0.000287317	-11.7651	3.90161e-15	8.55382e-13	down	yes
275115	u	chr21	.	9747993	9748822	MSTRG.131607.1	1	830	MSTRG.131607	.	0.000378859	-11.3661	3.90161e-15	8.55382e-13	down	yes
267243	u	chr20	.	21458013	21458593	MSTRG.127991.1	1	581	MSTRG.127991	.	0.000265581	-11.8786	3.90161e-15	8.55382e-13	down	yes
192648	u	chr17	.	47783528	47784185	MSTRG.93560.1	1	658	MSTRG.93560	.	0.000300865	-11.6986	3.90161e-15	8.55382e-13	down	yes
184063	u	chr17	.	11081500	11081804	MSTRG.90419.1	1	305	MSTRG.90419	.	0.000139339	-12.8091	3.90161e-15	8.55382e-13	down	yes
28779	i	chr1	.	43267260	43267878	MSTRG.16028.1	1	619	MSTRG.16028	EBNA1BP2	0.000280599	-11.7992	3.97943e-15	8.67743e-13	down	yes
423059	i	chr8	.	101488703	101489336	MSTRG.212631.1	1	634	MSTRG.212631	AP001207	0.000290411	-11.7496	3.98241e-15	8.67743e-13	down	yes
416502	i	chr8	.	50183409	50183753	MSTRG.208568.1	1	345	MSTRG.208568	SNTG1	0.000158589	-12.6224	3.98241e-15	8.67743e-13	down	yes
130371	u	chr13	.	90713346	90713775	MSTRG.67212.1	1	430	MSTRG.67212	.	0.00019725	-12.3077	3.98241e-15	8.67743e-13	down	yes
266006	u	chr20	.	11201777	11202601	MSTRG.127128.1	1	825	MSTRG.127128	.	0.000378798	-11.3663	3.98241e-15	8.67743e-13	down	yes
131135	i	chr13	-	98555899	98561976	MSTRG.67747.3	2	5968	MSTRG.67747	STK24	1426.7	10.4785	4.01328e-15	8.72526e-13	up	yes
329862	i	chr4	.	105547948	105548274	MSTRG.159968.1	1	327	MSTRG.159968	AC004066	0.000151142	-12.6918	4.06453e-15	8.82194e-13	down	yes
57462	u	chr1	.	242833227	242833708	MSTRG.30671.1	1	482	MSTRG.30671	.	0.000222768	-12.1322	4.06453e-15	8.82194e-13	down	yes
344455	u	chr5	.	42334878	42335297	MSTRG.169201.1	1	420	MSTRG.169201	.	0.000193959	-12.332	4.06453e-15	8.82194e-13	down	yes
174570	u	chr16	.	62292394	62292808	MSTRG.86971.1	1	415	MSTRG.86971	.	0.000192906	-12.3398	4.14805e-15	8.94858e-13	down	yes
6386	u	X	.	51950273	51951179	MSTRG.4221.1	1	907	MSTRG.4221	.	0.000421052	-11.2137	4.14805e-15	8.94858e-13	down	yes
311038	u	chr3	.	161988215	161988660	MSTRG.149247.1	1	446	MSTRG.149247	.	0.000200717	-12.2826	4.22116e-15	9.09124e-13	down	yes
61709	i	chr10	.	23716402	23717197	MSTRG.32991.1	1	796	MSTRG.32991	KIAA1217	0.000370601	-11.3978	4.2331e-15	9.10191e-13	down	yes
366699	i	chr6	.	25857224	25857949	MSTRG.181452.1	1	726	MSTRG.181452	SLC17A3	0.000338109	-11.5302	4.2331e-15	9.10191e-13	down	yes
416391	i	chr8	.	49054768	49055338	MSTRG.208395.1	1	571	MSTRG.208395	PPDPFL	0.000265865	-11.877	4.2331e-15	9.10191e-13	down	yes
423939	u	chr8	.	106970593	106971246	MSTRG.213147.1	1	654	MSTRG.213147	.	0.00030368	-11.6852	4.23544e-15	9.10194e-13	down	yes
359450	u	chr5	.	155508547	155509208	MSTRG.177562.1	1	662	MSTRG.177562	.	0.000285334	-11.7751	4.26539e-15	9.1512e-13	down	yes
137251	i	chr14	.	38195741	38196214	MSTRG.70563.1	1	474	MSTRG.70563	AL392023	0.000222697	-12.1326	4.31265e-15	9.22243e-13	down	yes
137005	i	chr14	.	36507624	36508352	MSTRG.70409.1	1	729	MSTRG.70409	SFTA3	0.000337933	-11.531	4.31286e-15	9.22243e-13	down	yes
414625	u	chr8	.	36964525	36965119	MSTRG.207695.1	1	595	MSTRG.207695	.	0.000278605	-11.8095	4.31982e-15	9.22243e-13	down	yes
12938	u	X	.	109980960	109981447	MSTRG.8624.1	1	488	MSTRG.8624	.	0.000228721	-12.0941	4.31982e-15	9.22243e-13	down	yes
61174	i	chr10	.	19061495	19061942	MSTRG.32709.1	1	448	MSTRG.32709	MALRD1	0.000210158	-12.2162	4.31982e-15	9.22243e-13	down	yes
373498	i	chr6	.	64320449	64320723	MSTRG.184631.1	1	275	MSTRG.184631	EYS	0.00012906	-12.9197	4.31982e-15	9.22243e-13	down	yes
258937	i	chr2	.	209897995	209898758	MSTRG.123840.1	1	764	MSTRG.123840	UNC80	0.000359081	-11.4434	4.31982e-15	9.22243e-13	down	yes
255384	i	chr2	.	183909086	183909517	MSTRG.121802.1	1	432	MSTRG.121802	AC093639	0.000202909	-12.2669	4.34191e-15	9.25625e-13	down	yes
204352	u	chr18	.	28599473	28599887	MSTRG.98161.1	1	415	MSTRG.98161	.	0.000194187	-12.3303	4.34277e-15	9.25625e-13	down	yes
362034	j	chr5	+	176652743	176659054	MSTRG.179243.12	5	2471	MSTRG.179243	TSPAN17	0.00100744	-9.95509	4.37219e-15	9.30375e-13	down	yes
436653	u	chr9	.	81404249	81404555	MSTRG.220540.1	1	307	MSTRG.220540	.	0.000144382	-12.7578	4.38274e-15	9.31963e-13	down	yes
299076	i	chr3	+	66015284	66034042	MSTRG.142555.2	2	18469	MSTRG.142555	MAGI1	519.456	9.02086	4.39545e-15	9.338e-13	up	yes
17176	u	X	.	149823325	149823605	MSTRG.11643.1	1	281	MSTRG.11643	.	0.000132422	-12.8826	4.40839e-15	9.3401e-13	down	yes
3882	u	X	.	34754384	34754771	MSTRG.2609.1	1	388	MSTRG.2609	.	0.000182643	-12.4187	4.40839e-15	9.3401e-13	down	yes
350040	i	chr5	.	88461415	88462068	MSTRG.172487.1	1	654	MSTRG.172487	AC091826	0.000309065	-11.6598	4.40839e-15	9.3401e-13	down	yes
307483	u	chr3	.	135811975	135812329	MSTRG.147259.1	1	355	MSTRG.147259	.	0.000167088	-12.5471	4.47414e-15	9.46871e-13	down	yes
337130	i	chr4	.	168114477	168115536	MSTRG.164649.1	1	1060	MSTRG.164649	ANXA10	0.000502257	-10.9593	4.4812e-15	9.46871e-13	down	yes
370067	u	chr6	-	36606539	36622219	MSTRG.182589.2	2	9231	MSTRG.182589	.	943.726	9.88222	4.49496e-15	9.48618e-13	up	yes
31627	i	chr1	.	56768783	56769019	MSTRG.17290.1	1	237	MSTRG.17290	FYB2	0.0001121	-13.1229	4.49902e-15	9.48618e-13	down	yes
424848	u	chr8	-	116615543	116615793	MSTRG.213847.1	2	231	MSTRG.213847	.	0.000109734	-13.1537	4.49902e-15	9.48618e-13	down	yes
132357	i	chr13	.	109499108	109499669	MSTRG.68513.1	1	562	MSTRG.68513	AL163541	0.000259829	-11.9101	4.49918e-15	9.48618e-13	down	yes
56926	i	chr1	.	237533495	237534088	MSTRG.30395.1	1	594	MSTRG.30395	RYR2	0.000280861	-11.7979	4.53722e-15	9.56124e-13	down	yes
79210	i	chr11	.	13090113	13090384	MSTRG.42039.1	1	272	MSTRG.42039	AC013762	0.000129285	-12.9172	4.57444e-15	9.62928e-13	down	yes
72515	u	chr10	.	107321464	107322266	MSTRG.38995.1	1	803	MSTRG.38995	.	0.000383368	-11.349	4.59194e-15	9.64016e-13	down	yes
48453	u	chr1	.	178931555	178931957	MSTRG.25611.1	1	403	MSTRG.25611	.	0.000191926	-12.3472	4.59194e-15	9.64016e-13	down	yes
117575	i	chr12	.	109019131	109019827	MSTRG.60063.1	1	697	MSTRG.60063	SVOP	0.000333035	-11.552	4.59194e-15	9.64016e-13	down	yes
276912	u	chr21	.	26683240	26683550	MSTRG.132737.1	1	311	MSTRG.132737	.	0.000148233	-12.7198	4.59194e-15	9.64016e-13	down	yes
2438	i	X	.	19404064	19404443	MSTRG.1616.1	1	380	MSTRG.1616	MAP3K15	0.000180919	-12.4324	4.59194e-15	9.64016e-13	down	yes
227886	i	chr19	.	53045364	53045591	MSTRG.107695.1	1	228	MSTRG.107695	ERVV-2	0.000109035	-13.1629	4.62509e-15	9.69414e-13	down	yes
255073	u	chr2	.	181439756	181439978	MSTRG.121562.1	1	223	MSTRG.121562	.	0.000104054	-13.2304	4.639e-15	9.71807e-13	down	yes
25964	u	chr1	.	30184333	30184570	MSTRG.14821.1	1	238	MSTRG.14821	.	0.000112119	-13.1227	4.64952e-15	9.73491e-13	down	yes
421103	i	chr8	.	88515846	88516210	MSTRG.211524.1	1	365	MSTRG.211524	AC090578	0.000174798	-12.482	4.66376e-15	9.75824e-13	down	yes
288395	u	chr3	-	10001	10916	MSTRG.137644.10	4	245	MSTRG.137644	.	0.000117246	-13.0582	4.68133e-15	9.75824e-13	down	yes
194175	u	chr17	.	54412332	54412906	MSTRG.94107.1	1	575	MSTRG.94107	.	0.000275526	-11.8255	4.68133e-15	9.75824e-13	down	yes
46488	u	chr1	.	164470594	164470822	MSTRG.24426.1	1	229	MSTRG.24426	.	0.000109698	-13.1542	4.68133e-15	9.75824e-13	down	yes
259454	i	chr2	.	215088238	215088639	MSTRG.124181.1	1	402	MSTRG.124181	ABCA12	0.000192296	-12.3444	4.68133e-15	9.75824e-13	down	yes
291729	i	chr3	.	20946491	20946818	MSTRG.139355.1	1	328	MSTRG.139355	SGO1-AS1	0.000157193	-12.6352	4.68133e-15	9.75824e-13	down	yes
118645	i	chr12	.	113589212	113589967	MSTRG.60412.1	1	756	MSTRG.60412	LINC01234	0.000350379	-11.4788	4.68343e-15	9.75824e-13	down	yes
314718	u	chr3	.	187304213	187304458	MSTRG.151086.1	1	246	MSTRG.151086	.	0.000116349	-13.0693	4.6926e-15	9.76236e-13	down	yes
319000	u	chr4	.	10942985	10943221	MSTRG.152994.1	1	237	MSTRG.152994	.	0.00011432	-13.0946	4.76298e-15	9.85732e-13	down	yes
216669	u	chr19	.	15704588	15704984	MSTRG.103858.1	1	397	MSTRG.103858	.	0.000191599	-12.3496	4.76298e-15	9.85732e-13	down	yes
337390	u	chr4	.	170561878	170562302	MSTRG.164790.1	1	425	MSTRG.164790	.	0.000205283	-12.2501	4.76298e-15	9.85732e-13	down	yes
102922	i	chr12	+	15156065	15173898	MSTRG.52751.5	2	17752	MSTRG.52751	RERG	416.788	8.70317	4.76337e-15	9.85732e-13	up	yes
394971	u	chr7	.	60938701	60939222	MSTRG.197571.1	1	522	MSTRG.197571	.	0.000246809	-11.9843	4.76415e-15	9.85732e-13	down	yes
121692	i	chr12	-	130646039	130646461	MSTRG.61781.4	3	231	MSTRG.61781	RIMBP2	0.00011215	-13.1223	4.7782e-15	9.87736e-13	down	yes
347668	u	chr5	.	71816479	71816835	MSTRG.171047.1	1	357	MSTRG.171047	.	0.000173027	-12.4967	4.84741e-15	9.94978e-13	down	yes
299973	u	chr3	.	73905444	73905887	MSTRG.142965.1	1	444	MSTRG.142965	.	0.000215602	-12.1793	4.84741e-15	9.94978e-13	down	yes
321210	i	chr4	.	32644062	32644640	MSTRG.154559.1	1	579	MSTRG.154559	AC116611	0.000281371	-11.7952	4.84741e-15	9.94978e-13	down	yes
324568	u	chr4	.	63274999	63275260	MSTRG.156746.1	1	262	MSTRG.156746	.	0.000127022	-12.9426	4.84741e-15	9.94978e-13	down	yes
312337	i	chr3	.	173255994	173256334	MSTRG.150052.1	1	341	MSTRG.150052	AC068759	0.000164959	-12.5656	4.84741e-15	9.94978e-13	down	yes
419752	u	chr8	.	77144179	77144747	MSTRG.210565.1	1	569	MSTRG.210565	.	0.0002754	-11.8262	4.84741e-15	9.94978e-13	down	yes
236997	i	chr2	.	48254164	48254390	MSTRG.111861.1	1	227	MSTRG.111861	AC092650	0.000109928	-13.1512	4.84741e-15	9.94978e-13	down	yes
33771	u	chr1	.	73494381	73494719	MSTRG.18281.1	1	339	MSTRG.18281	.	0.000162885	-12.5839	4.84887e-15	9.94978e-13	down	yes
357039	u	chr5	.	141027750	141028231	MSTRG.176351.1	1	482	MSTRG.176351	.	0.000228888	-12.0931	4.87121e-15	9.98513e-13	down	yes
12352	u	X	.	104299789	104300358	MSTRG.8193.1	1	570	MSTRG.8193	.	0.000276361	-11.8212	4.88489e-15	1.00029e-12	down	yes
144272	u	chr14	.	86537828	86538253	MSTRG.74524.1	1	426	MSTRG.74524	.	0.000208336	-12.2288	4.93516e-15	1.0053e-12	down	yes
212344	u	chr19	.	4125359	4125641	MSTRG.102513.1	1	283	MSTRG.102513	.	0.000138317	-12.8197	4.93516e-15	1.0053e-12	down	yes
335068	i	chr4	.	149652513	149652812	MSTRG.163326.1	1	300	MSTRG.163326	IQCM	0.000146155	-12.7402	4.93516e-15	1.0053e-12	down	yes
394103	i	chr7	.	50927819	50928252	MSTRG.197070.1	1	434	MSTRG.197070	AC004830	0.000212086	-12.2031	4.93516e-15	1.0053e-12	down	yes
335081	i	chr4	.	149766345	149767033	MSTRG.163337.1	1	689	MSTRG.163337	IQCM	0.000336261	-11.5381	4.93516e-15	1.0053e-12	down	yes
324599	u	chr4	.	63637530	63638389	MSTRG.156775.1	1	860	MSTRG.156775	.	0.000419587	-11.2187	4.93516e-15	1.0053e-12	down	yes
75129	u	chr10	.	128485909	128486258	MSTRG.40451.1	1	350	MSTRG.40451	.	0.000170294	-12.5197	4.93516e-15	1.0053e-12	down	yes
392718	u	chr7	.	42588396	42589077	MSTRG.196303.1	1	682	MSTRG.196303	.	0.000328012	-11.574	4.95076e-15	1.00742e-12	down	yes
340206	u	chr5	.	2672555	2673008	MSTRG.166429.1	1	454	MSTRG.166429	.	0.000216992	-12.1701	5.00258e-15	1.01502e-12	down	yes
336629	u	chr4	.	162664898	162665505	MSTRG.164225.1	1	608	MSTRG.164225	.	0.000298923	-11.7079	5.02702e-15	1.01502e-12	down	yes
308733	u	chr3	.	144796878	144797105	MSTRG.147950.1	1	228	MSTRG.147950	.	0.000111598	-13.1294	5.02702e-15	1.01502e-12	down	yes
4754	u	X	.	42027234	42027639	MSTRG.3256.1	1	406	MSTRG.3256	.	0.000198905	-12.2956	5.02702e-15	1.01502e-12	down	yes
186356	u	chr17	.	21068382	21068724	MSTRG.91308.1	1	343	MSTRG.91308	.	0.000168493	-12.535	5.02702e-15	1.01502e-12	down	yes
132589	u	chr13	.	111060448	111061082	MSTRG.68601.1	1	635	MSTRG.68601	.	0.000312102	-11.6457	5.02702e-15	1.01502e-12	down	yes
56968	u	chr1	.	237999723	238000070	MSTRG.30321.1	1	348	MSTRG.30321	.	0.000170346	-12.5192	5.02702e-15	1.01502e-12	down	yes
15512	i	X	.	133737451	133737952	MSTRG.10505.1	1	502	MSTRG.10505	GPC3	0.000245805	-11.9902	5.02702e-15	1.01502e-12	down	yes
184786	i	chr17	.	15852872	15853115	MSTRG.90845.1	1	244	MSTRG.90845	SPECC1P1	0.000119411	-13.0318	5.02702e-15	1.01502e-12	down	yes
310215	i	chr3	.	156025623	156026148	MSTRG.148865.1	1	526	MSTRG.148865	VN2R1P	0.000253274	-11.947	5.04565e-15	1.01825e-12	down	yes
134088	u	chr14	.	21970339	21970920	MSTRG.69145.1	1	582	MSTRG.69145	.	0.000286704	-11.7681	5.11066e-15	1.0256e-12	down	yes
324709	u	chr4	.	65117625	65117974	MSTRG.156855.1	1	350	MSTRG.156855	.	0.000172583	-12.5004	5.12403e-15	1.0256e-12	down	yes
341284	i	chr5	.	12678069	12678427	MSTRG.167181.1	1	359	MSTRG.167181	LINC01194	0.000176857	-12.4651	5.12403e-15	1.0256e-12	down	yes
388350	u	chr7	.	8993547	8994184	MSTRG.193715.1	1	638	MSTRG.193715	.	0.000314496	-11.6347	5.12403e-15	1.0256e-12	down	yes
146130	u	chr14	.	97303569	97303847	MSTRG.75394.1	1	279	MSTRG.75394	.	0.000137669	-12.8265	5.12403e-15	1.0256e-12	down	yes
265316	u	chr20	.	5255416	5255788	MSTRG.126766.1	1	373	MSTRG.126766	.	0.000183499	-12.4119	5.12403e-15	1.0256e-12	down	yes
209476	u	chr18	.	71260026	71260353	MSTRG.101194.1	1	328	MSTRG.101194	.	0.000162211	-12.5898	5.12403e-15	1.0256e-12	down	yes
364871	i	chr6	.	10209549	10209980	MSTRG.180251.1	1	432	MSTRG.180251	OFCC1	0.000212557	-12.1999	5.12403e-15	1.0256e-12	down	yes
262954	u	chr2	.	236820851	236821727	MSTRG.125885.1	1	877	MSTRG.125885	.	0.000433783	-11.1707	5.12403e-15	1.0256e-12	down	yes
311272	u	chr3	.	164868057	164868641	MSTRG.149431.1	1	585	MSTRG.149431	.	0.00028859	-11.7587	5.21839e-15	1.04182e-12	down	yes
50117	i	chr1	.	193491204	193491424	MSTRG.26705.1	1	221	MSTRG.26705	AL136456	0.000107742	-13.1801	5.22818e-15	1.04324e-12	down	yes
247675	i	chr2	.	124758526	124758730	MSTRG.117400.1	1	205	MSTRG.117400	CNTNAP5	0.000101776	-13.2623	5.24938e-15	1.04427e-12	down	yes
276389	i	chr21	.	21661515	21661892	MSTRG.132308.1	1	378	MSTRG.132308	AF241725	0.00018784	-12.3782	5.24938e-15	1.04427e-12	down	yes
416459	u	chr8	.	49886023	49886899	MSTRG.208522.1	1	877	MSTRG.208522	.	0.000434794	-11.1674	5.24938e-15	1.04427e-12	down	yes
247287	u	chr2	.	120578311	120579235	MSTRG.117128.1	1	925	MSTRG.117128	.	0.000458841	-11.0897	5.24938e-15	1.04427e-12	down	yes
68447	i	chr10	-	79202536	79208053	MSTRG.36823.2	2	5453	MSTRG.36823	ZMIZ1	1382.55	10.4331	5.26841e-15	1.04708e-12	up	yes
331112	i	chr4	.	114828524	114829138	MSTRG.160637.1	1	615	MSTRG.160637	NDST4	0.000303816	-11.6845	5.31713e-15	1.05293e-12	down	yes
209650	u	chr18	.	73414358	73414609	MSTRG.101456.1	1	252	MSTRG.101456	.	0.000122761	-12.9919	5.32328e-15	1.05361e-12	down	yes
57428	i	chr1	.	242280436	242281244	MSTRG.30683.1	1	809	MSTRG.30683	PLD5	0.000403305	-11.2758	5.35064e-15	1.05689e-12	down	yes
409490	u	chr8	.	350132	350763	MSTRG.204891.1	1	632	MSTRG.204891	.	0.000315609	-11.6296	5.35064e-15	1.05689e-12	down	yes
320873	i	chr4	.	28249298	28249775	MSTRG.154267.1	1	478	MSTRG.154267	AC093791	0.000239078	-12.0302	5.35064e-15	1.05689e-12	down	yes
184210	u	chr17	.	12434570	12434812	MSTRG.90547.1	1	243	MSTRG.90547	.	0.000121483	-13.007	5.35064e-15	1.05689e-12	down	yes
171687	u	chr16	.	34062946	34063172	MSTRG.85607.1	1	227	MSTRG.85607	.	0.000109167	-13.1612	5.36198e-15	1.05859e-12	down	yes
171936	i	chr16	.	46529723	46529935	MSTRG.85769.1	1	213	MSTRG.85769	ANKRD26P1	9.96364e-05	-13.293	5.38015e-15	1.06111e-12	down	yes
290722	i	chr3	.	14006046	14006692	MSTRG.138846.1	1	647	MSTRG.138846	TPRXL	0.000315547	-11.6299	5.43389e-15	1.0674e-12	down	yes
53614	i	chr1	.	216897044	216897275	MSTRG.28447.1	1	232	MSTRG.28447	ESRRG	0.00011665	-13.0655	5.46164e-15	1.06742e-12	down	yes
364343	i	chr6	.	6519992	6520229	MSTRG.180083.1	1	238	MSTRG.180083	LY86-AS1	0.000119217	-13.0341	5.46164e-15	1.06742e-12	down	yes
127870	u	chr13	.	63344538	63345364	MSTRG.65208.1	1	827	MSTRG.65208	.	0.000416179	-11.2305	5.46164e-15	1.06742e-12	down	yes
119269	i	chr12	.	119035518	119035725	MSTRG.60790.1	1	208	MSTRG.60790	SRRM4	0.000104732	-13.221	5.46164e-15	1.06742e-12	down	yes
430825	i	chr9	.	13552080	13552621	MSTRG.216929.1	1	542	MSTRG.216929	AL583785	0.000271429	-11.8471	5.46164e-15	1.06742e-12	down	yes
441548	u	chr9	.	119052109	119052527	MSTRG.223473.1	1	419	MSTRG.223473	.	0.000211007	-12.2104	5.46164e-15	1.06742e-12	down	yes
336607	i	chr4	.	162141691	162142449	MSTRG.164277.1	1	759	MSTRG.164277	FSTL5	0.000380131	-11.3612	5.46164e-15	1.06742e-12	down	yes
337950	u	chr4	.	175236816	175237560	MSTRG.165143.1	1	745	MSTRG.165143	.	0.000374943	-11.381	5.46164e-15	1.06742e-12	down	yes
116941	i	chr12	-	104611325	104693371	MSTRG.59799.2	2	81914	MSTRG.59799	CHST11	95.6025	6.57898	5.53606e-15	1.07879e-12	up	yes
94382	i	chr11	.	105730784	105731067	MSTRG.48961.1	1	284	MSTRG.48961	GRIA4	0.000142285	-12.7789	5.67424e-15	1.10403e-12	down	yes
58946	u	chr10	.	3711801	3712082	MSTRG.31437.1	1	282	MSTRG.31437	.	0.000141314	-12.7888	5.67424e-15	1.10403e-12	down	yes
379922	i	chr6	.	118028378	118028840	MSTRG.188982.1	1	463	MSTRG.188982	SLC35F1	0.000227785	-12.1	5.67866e-15	1.10403e-12	down	yes
336430	u	chr4	.	159566346	159566640	MSTRG.164076.1	1	295	MSTRG.164076	.	0.000150137	-12.7014	5.72206e-15	1.10403e-12	down	yes
403151	i	chr7	.	116101225	116101492	MSTRG.201505.1	1	268	MSTRG.201505	TFEC	0.00013645	-12.8393	5.72206e-15	1.10403e-12	down	yes
382856	u	chr6	.	141331158	141331391	MSTRG.190767.1	1	234	MSTRG.190767	.	0.000118826	-13.0389	5.72206e-15	1.10403e-12	down	yes
89127	u	chr11	.	68646054	68646294	MSTRG.46193.1	1	241	MSTRG.46193	.	0.000122566	-12.9942	5.72206e-15	1.10403e-12	down	yes
99350	u	chr11	.	134726764	134727010	MSTRG.51337.1	1	247	MSTRG.51337	.	0.000125667	-12.9581	5.72206e-15	1.10403e-12	down	yes
290196	i	chr3	.	10609600	10610013	MSTRG.138631.1	1	414	MSTRG.138631	ATP2B2	0.00020983	-12.2185	5.72206e-15	1.10403e-12	down	yes
353072	u	chr5	.	115328349	115328905	MSTRG.174352.1	1	557	MSTRG.174352	.	0.000283185	-11.786	5.72206e-15	1.10403e-12	down	yes
5048	u	X	.	45470186	45470461	MSTRG.3525.1	1	276	MSTRG.3525	.	0.000140031	-12.802	5.72206e-15	1.10403e-12	down	yes
333285	i	chr4	.	134785388	134785939	MSTRG.162102.1	1	552	MSTRG.162102	AC093722	0.000279907	-11.8028	5.72206e-15	1.10403e-12	down	yes
73018	u	chr10	.	111660015	111660521	MSTRG.39332.1	1	507	MSTRG.39332	.	0.000257395	-11.9237	5.72206e-15	1.10403e-12	down	yes
152915	i	chr15	.	43970049	43970277	MSTRG.78137.1	1	229	MSTRG.78137	FRMD5	0.00011651	-13.0673	5.72206e-15	1.10403e-12	down	yes
303857	o	chr3	-	113252520	113263503	MSTRG.145555.3	3	10847	MSTRG.145555	AC026329	603.872	9.2381	5.80202e-15	1.11576e-12	up	yes
336634	i	chr4	.	162712702	162713339	MSTRG.164286.1	1	638	MSTRG.164286	AC021134	0.000325585	-11.5847	5.83001e-15	1.11576e-12	down	yes
425293	i	chr8	.	120971562	120971808	MSTRG.214188.1	1	247	MSTRG.214188	AC068413	0.000125918	-12.9552	5.83001e-15	1.11576e-12	down	yes
209483	u	chr18	.	71391546	71392127	MSTRG.101204.1	1	582	MSTRG.101204	.	0.000297149	-11.7165	5.83001e-15	1.11576e-12	down	yes
388302	i	chr7	.	8302706	8303066	MSTRG.193694.1	1	361	MSTRG.193694	AC007128	0.000184698	-12.4025	5.83001e-15	1.11576e-12	down	yes
315244	i	chr3	.	192419033	192419354	MSTRG.151411.1	1	322	MSTRG.151411	FGF12	0.000164166	-12.5726	5.83001e-15	1.11576e-12	down	yes
137640	i	chr14	.	40669136	40669872	MSTRG.70750.1	1	737	MSTRG.70750	AL390800	0.00037686	-11.3737	5.83001e-15	1.11576e-12	down	yes
336685	u	chr4	.	163224200	163224570	MSTRG.164317.1	1	371	MSTRG.164317	.	0.000189799	-12.3632	5.83001e-15	1.11576e-12	down	yes
11548	u	X	.	100088456	100088773	MSTRG.7850.1	1	318	MSTRG.7850	.	0.000162438	-12.5878	5.83001e-15	1.11576e-12	down	yes
217113	i	chr19	.	16752437	16752859	MSTRG.104015.1	1	423	MSTRG.104015	NWD1	0.000216437	-12.1738	5.83001e-15	1.11576e-12	down	yes
423071	i	chr8	.	101579761	101580143	MSTRG.212640.1	1	383	MSTRG.212640	GRHL2	0.000195988	-12.3169	5.83511e-15	1.11576e-12	down	yes
445166	u	chr9	.	136789441	136790041	MSTRG.224887.1	1	601	MSTRG.224887	.	0.000305003	-11.6789	5.83833e-15	1.11576e-12	down	yes
338450	u	chr4	.	181494696	181494937	MSTRG.165582.1	1	242	MSTRG.165582	.	0.000122295	-12.9973	5.83994e-15	1.11576e-12	down	yes
105316	u	chr12	.	33272167	33272487	MSTRG.54004.1	1	321	MSTRG.54004	.	0.000159758	-12.6118	5.85316e-15	1.11719e-12	down	yes
30052	u	chr1	.	47065683	47065963	MSTRG.16403.1	1	281	MSTRG.16403	.	0.000142231	-12.7795	5.86107e-15	1.11816e-12	down	yes
346067	i	chr5	.	58728742	58729405	MSTRG.170250.1	1	664	MSTRG.170250	RAB3C	0.000336764	-11.536	5.89399e-15	1.12279e-12	down	yes
264468	u	chr20	.	949047	949691	MSTRG.126381.1	1	645	MSTRG.126381	.	0.000327302	-11.5771	5.89399e-15	1.12279e-12	down	yes
320851	u	chr4	.	28019326	28019535	MSTRG.154244.1	1	210	MSTRG.154244	.	0.000101984	-13.2594	5.93473e-15	1.13e-12	down	yes
96069	i	chr11	-	117041003	117062003	MSTRG.49930.5	2	20603	MSTRG.49930	SIK3	501.014	8.96871	5.97233e-15	1.13661e-12	up	yes
287046	u	chr22	.	43912837	43913265	MSTRG.137112.1	1	429	MSTRG.137112	.	0.000219762	-12.1518	6.00131e-15	1.14101e-12	down	yes
45319	i	chr1	.	159392866	159393139	MSTRG.23977.1	1	274	MSTRG.23977	AL513323	0.000140635	-12.7958	6.05614e-15	1.14976e-12	down	yes
130615	i	chr13	-	93454534	93466854	MSTRG.67481.4	2	12280	MSTRG.67481	GPC6	650.403	9.34519	6.06371e-15	1.15064e-12	up	yes
411178	o	chr8	+	12194976	12444894	MSTRG.205982.6	4	630	MSTRG.205982	FAM66A	0.000125706	-12.9577	6.09499e-15	1.15489e-12	down	yes
48661	i	chr1	.	180520632	180521148	MSTRG.25731.1	1	517	MSTRG.25731	OVAAL	0.000267082	-11.8704	6.13377e-15	1.15719e-12	down	yes
301797	i	chr3	.	98355759	98355995	MSTRG.144442.1	1	237	MSTRG.144442	AC117473	0.000122285	-12.9975	6.13377e-15	1.15719e-12	down	yes
343572	u	chr5	.	35413767	35414060	MSTRG.168719.1	1	294	MSTRG.168719	.	0.000152299	-12.6808	6.13377e-15	1.15719e-12	down	yes
80835	u	chr11	.	25612063	25612760	MSTRG.42981.1	1	698	MSTRG.42981	.	0.00036012	-11.4392	6.13377e-15	1.15719e-12	down	yes
377673	u	chr6	.	99819521	99820536	MSTRG.187535.1	1	1016	MSTRG.187535	.	0.000524313	-10.8973	6.13377e-15	1.15719e-12	down	yes
98967	i	chr11	.	131338929	131339160	MSTRG.51130.1	1	232	MSTRG.51130	AP002856	0.000120328	-13.0207	6.13377e-15	1.15719e-12	down	yes
405059	i	chr7	.	130304720	130305173	MSTRG.202637.1	1	454	MSTRG.202637	CPA4	0.000234327	-12.0592	6.13377e-15	1.15719e-12	down	yes
241624	i	chr2	.	78213916	78214585	MSTRG.114276.1	1	670	MSTRG.114276	AC012494	0.00034657	-11.4946	6.13377e-15	1.15719e-12	down	yes
186564	u	chr17	.	21961614	21962346	MSTRG.91470.1	1	733	MSTRG.91470	.	0.000379558	-11.3634	6.13377e-15	1.15719e-12	down	yes
219788	u	chr19	.	30151107	30151384	MSTRG.105116.1	1	278	MSTRG.105116	.	0.000142553	-12.7762	6.19072e-15	1.16344e-12	down	yes
351529	u	chr5	.	99614882	99615126	MSTRG.173282.1	1	245	MSTRG.173282	.	0.000126026	-12.954	6.19072e-15	1.16344e-12	down	yes
166066	i	chr16	.	6630983	6631291	MSTRG.83426.1	1	309	MSTRG.83426	RBFOX1	0.000158922	-12.6194	6.19072e-15	1.16344e-12	down	yes
376914	u	chr6	.	91397560	91397779	MSTRG.186989.1	1	220	MSTRG.186989	.	0.000113285	-13.1078	6.19072e-15	1.16344e-12	down	yes
247679	i	chr2	.	124826947	124827319	MSTRG.117404.1	1	373	MSTRG.117404	CNTNAP5	0.000191267	-12.3521	6.19072e-15	1.16344e-12	down	yes
137896	i	chr14	.	44064026	44064588	MSTRG.71131.1	1	563	MSTRG.71131	LINC02307	0.000289393	-11.7547	6.19072e-15	1.16344e-12	down	yes
48343	u	chr1	.	178051487	178051945	MSTRG.25564.1	1	459	MSTRG.25564	.	0.000235992	-12.049	6.19072e-15	1.16344e-12	down	yes
242103	u	chr2	.	84046053	84046260	MSTRG.114631.1	1	208	MSTRG.114631	.	0.000106321	-13.1993	6.24807e-15	1.1731e-12	down	yes
411329	j	chr8	+	13338383	13342754	MSTRG.206137.1	3	3615	MSTRG.206137	AC019270	0.000966336	-10.0152	6.31398e-15	1.18376e-12	down	yes
428182	u	chr8	.	141674867	141675181	MSTRG.215698.1	1	315	MSTRG.215698	.	0.000165026	-12.565	6.35752e-15	1.18737e-12	down	yes
315078	u	chr3	.	190913135	190913390	MSTRG.151298.1	1	256	MSTRG.151298	.	0.000134237	-12.8629	6.35752e-15	1.18737e-12	down	yes
114601	u	chr12	.	87594833	87595092	MSTRG.58545.1	1	260	MSTRG.58545	.	0.000135844	-12.8458	6.35752e-15	1.18737e-12	down	yes
72452	u	chr10	.	106290688	106290949	MSTRG.38968.1	1	262	MSTRG.38968	.	0.000137361	-12.8297	6.35752e-15	1.18737e-12	down	yes
293429	i	chr3	.	36724331	36724595	MSTRG.140370.1	1	265	MSTRG.140370	DCLK3	0.000139071	-12.8119	6.35752e-15	1.18737e-12	down	yes
403700	i	chr7	.	120673333	120673651	MSTRG.201868.1	1	319	MSTRG.201868	KCND2	0.000166861	-12.5491	6.35752e-15	1.18737e-12	down	yes
288400	u	chr3	-	10001	10916	MSTRG.137644.2	4	353	MSTRG.137644	.	0.000151045	-12.6927	6.37475e-15	1.18889e-12	down	yes
144090	u	chr14	.	84332248	84332653	MSTRG.74410.1	1	406	MSTRG.74410	.	0.000174186	-12.4871	6.37475e-15	1.18889e-12	down	yes
410812	u	chr8	.	10579854	10580158	MSTRG.205752.1	1	305	MSTRG.205752	.	0.000130757	-12.9008	6.37475e-15	1.18889e-12	down	yes
342495	u	chr5	.	25044739	25045187	MSTRG.168027.1	1	449	MSTRG.168027	.	0.00023686	-12.0437	6.50165e-15	1.20436e-12	down	yes
138224	u	chr14	.	46547576	46547871	MSTRG.71322.1	1	296	MSTRG.71322	.	0.000156394	-12.6425	6.50165e-15	1.20436e-12	down	yes
145629	u	chr14	.	94404382	94404687	MSTRG.75167.1	1	306	MSTRG.75167	.	0.000160786	-12.6026	6.50165e-15	1.20436e-12	down	yes
204393	u	chr18	.	29233477	29234164	MSTRG.98199.1	1	688	MSTRG.98199	.	0.00036282	-11.4285	6.50165e-15	1.20436e-12	down	yes
391721	i	chr7	.	34606762	34607169	MSTRG.195667.1	1	408	MSTRG.195667	NPSR1-AS1	0.000215285	-12.1815	6.50165e-15	1.20436e-12	down	yes
81790	u	chr11	.	32372853	32373326	MSTRG.43412.1	1	474	MSTRG.43412	.	0.000249883	-11.9665	6.50165e-15	1.20436e-12	down	yes
206021	u	chr18	.	43431870	43432119	MSTRG.99333.1	1	250	MSTRG.99333	.	0.000131784	-12.8895	6.50165e-15	1.20436e-12	down	yes
241708	u	chr2	.	79129000	79129265	MSTRG.114309.1	1	266	MSTRG.114309	.	0.000140392	-12.7982	6.50165e-15	1.20436e-12	down	yes
288615	u	chr3	.	2045803	2046241	MSTRG.137807.1	1	439	MSTRG.137807	.	0.000231165	-12.0788	6.50165e-15	1.20436e-12	down	yes
230583	u	chr2	.	2860501	2861158	MSTRG.108468.1	1	658	MSTRG.108468	.	0.000346484	-11.4949	6.50165e-15	1.20436e-12	down	yes
16078	u	X	.	137185571	137186170	MSTRG.10817.1	1	600	MSTRG.10817	.	0.000306045	-11.674	6.56978e-15	1.2154e-12	down	yes
161959	i	chr15	.	93951457	93952271	MSTRG.81992.1	1	815	MSTRG.81992	LINC01581	0.00041236	-11.2438	6.64009e-15	1.22042e-12	down	yes
66387	i	chr10	.	66660563	66660793	MSTRG.35903.1	1	231	MSTRG.35903	CTNNA3	0.000120825	-13.0148	6.65049e-15	1.22042e-12	down	yes
56127	u	chr1	.	232800966	232801262	MSTRG.29891.1	1	297	MSTRG.29891	.	0.000157431	-12.633	6.65312e-15	1.22042e-12	down	yes
358869	i	chr5	.	151435671	151435928	MSTRG.177250.1	1	258	MSTRG.177250	AC034205	0.000136826	-12.8354	6.65312e-15	1.22042e-12	down	yes
432126	u	chr9	.	25919251	25919753	MSTRG.217884.1	1	503	MSTRG.217884	.	0.000266161	-11.8754	6.65312e-15	1.22042e-12	down	yes
409036	u	chr7	.	156211577	156211845	MSTRG.204645.1	1	269	MSTRG.204645	.	0.000142802	-12.7737	6.65312e-15	1.22042e-12	down	yes
251355	u	chr2	.	155448116	155448382	MSTRG.119666.1	1	267	MSTRG.119666	.	0.000141411	-12.7878	6.65312e-15	1.22042e-12	down	yes
102676	i	chr12	.	13505099	13505361	MSTRG.52631.1	1	263	MSTRG.52631	GRIN2B	0.000139536	-12.8071	6.65312e-15	1.22042e-12	down	yes
205747	u	chr18	.	40169224	40169881	MSTRG.99068.1	1	658	MSTRG.99068	.	0.000348959	-11.4847	6.65312e-15	1.22042e-12	down	yes
80472	u	chr11	.	21632500	21632732	MSTRG.42669.1	1	233	MSTRG.42669	.	0.000123404	-12.9843	6.65312e-15	1.22042e-12	down	yes
58758	i	chr10	.	2309767	2310558	MSTRG.31353.1	1	792	MSTRG.31353	LINC00701	0.000419049	-11.2206	6.65312e-15	1.22042e-12	down	yes
300953	i	chr3	.	85690272	85690490	MSTRG.143823.1	1	219	MSTRG.143823	CADM2	0.000115854	-13.0754	6.65312e-15	1.22042e-12	down	yes
153377	i	chr15	.	45921760	45922255	MSTRG.78343.1	1	496	MSTRG.78343	AC068722	0.000263439	-11.8902	6.65312e-15	1.22042e-12	down	yes
245878	i	chr2	.	111022810	111023800	MSTRG.116407.1	1	991	MSTRG.116407	ACOXL	0.000525823	-10.8931	6.65312e-15	1.22042e-12	down	yes
138395	u	chr14	.	48882657	48883050	MSTRG.71511.1	1	394	MSTRG.71511	.	0.000208847	-12.2253	6.65312e-15	1.22042e-12	down	yes
244735	u	chr2	.	102256351	102256606	MSTRG.115731.1	1	256	MSTRG.115731	.	0.00013545	-12.8499	6.65312e-15	1.22042e-12	down	yes
151	u	X	-	938693	939272	MSTRG.82.3	2	456	MSTRG.82	.	0.000241244	-12.0172	6.65312e-15	1.22042e-12	down	yes
277810	i	chr21	.	33059738	33060313	MSTRG.133329.1	1	576	MSTRG.133329	LINC00945	0.000296986	-11.7173	6.6585e-15	1.22068e-12	down	yes
412790	o	chr8	+	23100321	23149157	MSTRG.206640.4	2	234	MSTRG.206640	AC107959	8.43955e-05	-13.5325	6.66298e-15	1.22068e-12	down	yes
444688	u	chr9	+	134637834	134640715	MSTRG.224695.2	2	2705	MSTRG.224695	.	0.00108049	-9.85409	6.69136e-15	1.22227e-12	down	yes
344942	i	chr5	.	45589322	45589979	MSTRG.169505.1	1	658	MSTRG.169505	HCN1	0.000345566	-11.4988	6.79154e-15	1.23575e-12	down	yes
46782	u	chr1	.	166752279	166753124	MSTRG.24622.1	1	846	MSTRG.24622	.	0.000450459	-11.1163	6.8157e-15	1.23575e-12	down	yes
112978	i	chr12	.	72160796	72161107	MSTRG.57404.1	1	312	MSTRG.57404	TPH2	0.000166892	-12.5488	6.8157e-15	1.23575e-12	down	yes
431934	i	chr9	.	23208603	23209207	MSTRG.217733.1	1	605	MSTRG.217733	AL391117	0.000322648	-11.5978	6.8157e-15	1.23575e-12	down	yes
147006	u	chr14	-	101607362	101608219	MSTRG.75748.4	2	710	MSTRG.75748	.	0.000378755	-11.3664	6.8157e-15	1.23575e-12	down	yes
194013	i	chr17	.	51976519	51977030	MSTRG.94046.1	1	512	MSTRG.94046	CA10	0.000272572	-11.8411	6.8157e-15	1.23575e-12	down	yes
158631	u	chr15	.	75823723	75824305	MSTRG.80677.1	1	583	MSTRG.80677	.	0.000311045	-11.6506	6.8157e-15	1.23575e-12	down	yes
441418	i	chr9	.	117378247	117378698	MSTRG.223378.1	1	452	MSTRG.223378	ASTN2	0.000241194	-12.0175	6.8157e-15	1.23575e-12	down	yes
365225	u	chr6	.	12415439	12416018	MSTRG.180521.1	1	580	MSTRG.180521	.	0.000309703	-11.6568	6.8157e-15	1.23575e-12	down	yes
419956	u	chr8	.	79099280	79099577	MSTRG.210684.1	1	298	MSTRG.210684	.	0.000159097	-12.6178	6.8157e-15	1.23575e-12	down	yes
73033	i	chr10	.	111830094	111830459	MSTRG.39348.1	1	366	MSTRG.39348	AL136119	0.00019563	-12.3196	6.8157e-15	1.23575e-12	down	yes
11326	u	X	.	96039362	96039638	MSTRG.7654.1	1	277	MSTRG.7654	.	0.000147515	-12.7268	6.8157e-15	1.23575e-12	down	yes
415351	u	chr8	.	40911625	40912020	MSTRG.207985.1	1	396	MSTRG.207985	.	0.000211647	-12.206	6.8157e-15	1.23575e-12	down	yes
150	u	X	-	938693	939272	MSTRG.82.2	2	456	MSTRG.82	.	0.000242841	-12.0077	6.8157e-15	1.23575e-12	down	yes
104821	u	chr12	.	30193752	30194324	MSTRG.53735.1	1	573	MSTRG.53735	.	0.000305914	-11.6746	6.8157e-15	1.23575e-12	down	yes
194403	i	chr17	.	56140117	56140400	MSTRG.94353.1	1	284	MSTRG.94353	ANKFN1	0.000149225	-12.7102	6.82587e-15	1.23644e-12	down	yes
437657	i	chr9	.	89582658	89583085	MSTRG.221144.1	1	428	MSTRG.221144	AL161910	0.000227025	-12.1049	6.86804e-15	1.24351e-12	down	yes
171468	u	chr16	.	32466885	32467192	MSTRG.85490.1	1	308	MSTRG.85490	.	0.000163876	-12.5751	6.87807e-15	1.2443e-12	down	yes
971	u	X	.	7865785	7866017	MSTRG.544.1	1	233	MSTRG.544	.	0.00012438	-12.973	6.94038e-15	1.24947e-12	down	yes
149126	i	chr15	.	24699155	24699742	MSTRG.77258.1	1	588	MSTRG.77258	AC090983	0.000312611	-11.6433	6.94154e-15	1.24947e-12	down	yes
388372	u	chr7	.	9249345	9249713	MSTRG.193719.1	1	369	MSTRG.193719	.	0.000197548	-12.3055	6.94891e-15	1.24947e-12	down	yes
83180	u	chr11	.	44524373	44524632	MSTRG.44373.1	1	260	MSTRG.44373	.	0.000139287	-12.8097	6.94891e-15	1.24947e-12	down	yes
319954	u	chr4	.	19012500	19013231	MSTRG.153563.1	1	732	MSTRG.153563	.	0.000393302	-11.3121	6.94891e-15	1.24947e-12	down	yes
258813	i	chr2	.	208565148	208565538	MSTRG.123755.1	1	391	MSTRG.123755	PTH2R	0.000210136	-12.2164	6.94891e-15	1.24947e-12	down	yes
427767	i	chr8	.	137838350	137838598	MSTRG.215537.1	1	249	MSTRG.215537	AC046195	0.000133349	-12.8725	6.94891e-15	1.24947e-12	down	yes
10944	u	X	.	90717921	90718695	MSTRG.7304.1	1	775	MSTRG.7304	.	0.000414869	-11.2351	6.94891e-15	1.24947e-12	down	yes
413318	u	chr8	.	27094281	27094685	MSTRG.206890.1	1	405	MSTRG.206890	.	0.000213743	-12.1918	6.98938e-15	1.25551e-12	down	yes
127093	i	chr13	.	53141747	53142089	MSTRG.64573.1	1	343	MSTRG.64573	LINC01065	0.000176364	-12.4692	7.0093e-15	1.25743e-12	down	yes
293328	i	chr3	.	35746049	35746562	MSTRG.140319.1	1	514	MSTRG.140319	ARPP21	0.000271569	-11.8464	7.07923e-15	1.26295e-12	down	yes
335832	i	chr4	.	154727355	154727619	MSTRG.163752.1	1	265	MSTRG.163752	LRAT	0.000138404	-12.8188	7.10563e-15	1.26295e-12	down	yes
331287	u	chr4	.	116993130	116993382	MSTRG.160803.1	1	253	MSTRG.160803	.	0.000136592	-12.8378	7.11434e-15	1.26295e-12	down	yes
94611	i	chr11	.	107710000	107710314	MSTRG.49143.1	1	315	MSTRG.49143	SLN	0.000170079	-12.5215	7.11434e-15	1.26295e-12	down	yes
255218	i	chr2	.	182498333	182498583	MSTRG.121691.1	1	251	MSTRG.121691	PDE1A	0.000135937	-12.8448	7.11434e-15	1.26295e-12	down	yes
106682	i	chr12	.	47409303	47409566	MSTRG.54993.1	1	264	MSTRG.54993	LINC02156	0.000143087	-12.7708	7.11434e-15	1.26295e-12	down	yes
359510	i	chr5	.	156258965	156259668	MSTRG.177664.1	1	704	MSTRG.177664	SGCD	0.000379279	-11.3645	7.11434e-15	1.26295e-12	down	yes
418128	i	chr8	.	63788892	63789250	MSTRG.209589.1	1	359	MSTRG.209589	LINC01414	0.000194511	-12.3279	7.11434e-15	1.26295e-12	down	yes
320774	u	chr4	.	27180167	27181073	MSTRG.154145.1	1	907	MSTRG.154145	.	0.000489596	-10.9961	7.11434e-15	1.26295e-12	down	yes
431453	u	chr9	.	20069104	20069559	MSTRG.217352.1	1	456	MSTRG.217352	.	0.000247067	-11.9828	7.11434e-15	1.26295e-12	down	yes
127219	u	chr13	.	54930720	54930971	MSTRG.64694.1	1	252	MSTRG.64694	.	0.000136236	-12.8416	7.11434e-15	1.26295e-12	down	yes
251309	u	chr2	.	154930401	154930709	MSTRG.119632.1	1	309	MSTRG.119632	.	0.000167463	-12.5439	7.11434e-15	1.26295e-12	down	yes
393847	u	chr7	.	49101045	49101650	MSTRG.196875.1	1	606	MSTRG.196875	.	0.000326702	-11.5797	7.11434e-15	1.26295e-12	down	yes
315257	i	chr3	.	192539830	192540391	MSTRG.151424.1	1	562	MSTRG.151424	FGF12	0.000303238	-11.6873	7.11434e-15	1.26295e-12	down	yes
319794	i	chr4	.	17719590	17719937	MSTRG.153516.1	1	348	MSTRG.153516	FAM184B	0.000188647	-12.372	7.11434e-15	1.26295e-12	down	yes
12472	u	X	.	106102694	106103200	MSTRG.8334.1	1	507	MSTRG.8334	.	0.000269022	-11.86	7.12775e-15	1.26361e-12	down	yes
308803	u	chr3	.	145711732	145712516	MSTRG.148019.1	1	785	MSTRG.148019	.	0.000409906	-11.2524	7.15356e-15	1.26761e-12	down	yes
74396	u	chr10	.	122362850	122363114	MSTRG.40067.1	1	265	MSTRG.40067	.	0.000143282	-12.7689	7.18126e-15	1.27136e-12	down	yes
232019	i	chr2	.	12450347	12450776	MSTRG.109204.1	1	430	MSTRG.109204	MIR3681HG	0.000222728	-12.1324	7.20868e-15	1.27506e-12	down	yes
61890	i	chr10	.	25308397	25308722	MSTRG.33147.1	1	326	MSTRG.33147	GPR158	0.000176527	-12.4678	7.21218e-15	1.2751e-12	down	yes
216483	u	chr19	+	15144753	15145021	MSTRG.103828.1	1	269	MSTRG.103828	.	0.000140868	-12.7934	7.23524e-15	1.27802e-12	down	yes
328673	i	chr4	.	96373195	96373554	MSTRG.159213.1	1	360	MSTRG.159213	LINC02267	0.000193205	-12.3376	7.26227e-15	1.27806e-12	down	yes
366660	u	chr6	.	25646432	25646735	MSTRG.181425.1	1	304	MSTRG.181425	.	0.000162967	-12.5831	7.26307e-15	1.27806e-12	down	yes
377480	i	chr6	.	98198120	98198515	MSTRG.187472.1	1	396	MSTRG.187472	AL589740	0.000215234	-12.1818	7.28775e-15	1.27806e-12	down	yes
26980	i	chr1	.	34650490	34650723	MSTRG.15211.1	1	234	MSTRG.15211	AC099565	0.000127455	-12.9377	7.28775e-15	1.27806e-12	down	yes
439367	u	chr9	.	100738805	100739024	MSTRG.221911.1	1	220	MSTRG.221911	.	0.00011985	-13.0265	7.28775e-15	1.27806e-12	down	yes
155349	u	chr15	.	59532711	59533024	MSTRG.79417.1	1	314	MSTRG.79417	.	0.000170505	-12.5179	7.28775e-15	1.27806e-12	down	yes
201415	i	chr18	.	2201641	2201885	MSTRG.96605.1	1	245	MSTRG.96605	AP005230	0.000133287	-12.8732	7.28775e-15	1.27806e-12	down	yes
414012	u	chr8	.	31193835	31194054	MSTRG.207207.1	1	220	MSTRG.207207	.	0.000119901	-13.0259	7.28775e-15	1.27806e-12	down	yes
144096	u	chr14	.	84371243	84371645	MSTRG.74416.1	1	403	MSTRG.74416	.	0.000219375	-12.1543	7.28775e-15	1.27806e-12	down	yes
12865	u	X	.	109178099	109178377	MSTRG.8578.1	1	279	MSTRG.8578	.	0.000151978	-12.6838	7.28775e-15	1.27806e-12	down	yes
259098	u	chr2	.	211143464	211143863	MSTRG.123889.1	1	400	MSTRG.123889	.	0.000217742	-12.1651	7.28775e-15	1.27806e-12	down	yes
440524	i	chr9	+	110892297	110896819	MSTRG.222837.2	2	4483	MSTRG.222837	LPAR1	1491.71	10.5428	7.43061e-15	1.29854e-12	up	yes
272182	u	chr20	.	50712628	50713307	MSTRG.130096.1	1	680	MSTRG.130096	.	0.000372001	-11.3924	7.47019e-15	1.29854e-12	down	yes
280511	u	chr22	.	12213296	12213524	MSTRG.134422.1	1	229	MSTRG.134422	.	0.000125341	-12.9619	7.47019e-15	1.29854e-12	down	yes
325299	u	chr4	.	70216255	70217026	MSTRG.157261.1	1	772	MSTRG.157261	.	0.000423619	-11.2049	7.47019e-15	1.29854e-12	down	yes
342134	i	chr5	.	20914167	20914440	MSTRG.167742.1	1	274	MSTRG.167742	LINC02241	0.000149779	-12.7049	7.47019e-15	1.29854e-12	down	yes
325469	i	chr4	.	71774789	71775030	MSTRG.157322.1	1	242	MSTRG.157322	GC	0.00013206	-12.8865	7.47019e-15	1.29854e-12	down	yes
208249	u	chr18	.	59852139	59852501	MSTRG.100425.1	1	363	MSTRG.100425	.	0.00019809	-12.3016	7.47019e-15	1.29854e-12	down	yes
415375	u	chr8	.	41231138	41231442	MSTRG.208037.1	1	305	MSTRG.208037	.	0.000166568	-12.5516	7.47019e-15	1.29854e-12	down	yes
439508	u	chr9	.	101985640	101986577	MSTRG.222150.1	1	938	MSTRG.222150	.	0.000513582	-10.9271	7.47019e-15	1.29854e-12	down	yes
741	u	X	.	5618895	5619714	MSTRG.446.1	1	820	MSTRG.446	.	0.000448128	-11.1238	7.47019e-15	1.29854e-12	down	yes
421039	u	chr8	.	87835119	87835902	MSTRG.211342.1	1	784	MSTRG.211342	.	0.000428932	-11.187	7.47019e-15	1.29854e-12	down	yes
390146	u	chr7	.	24564574	24565057	MSTRG.194910.1	1	484	MSTRG.194910	.	0.00025933	-11.9129	7.47924e-15	1.2994e-12	down	yes
146181	u	chr14	.	97845803	97846412	MSTRG.75436.1	1	610	MSTRG.75436	.	0.000320774	-11.6062	7.55207e-15	1.30792e-12	down	yes
346058	i	chr5	.	58634467	58635438	MSTRG.170242.1	1	972	MSTRG.170242	RAB3C	0.000530531	-10.8803	7.57411e-15	1.30792e-12	down	yes
173211	u	chr16	.	55161932	55162344	MSTRG.86416.1	1	413	MSTRG.86416	.	0.000209107	-12.2235	7.58784e-15	1.30792e-12	down	yes
341222	i	chr5	.	11591327	11591990	MSTRG.167146.1	1	664	MSTRG.167146	CTNND2	0.0003346	-11.5453	7.58784e-15	1.30792e-12	down	yes
252931	u	chr2	.	168394617	168395063	MSTRG.120610.1	1	447	MSTRG.120610	.	0.000226053	-12.1111	7.58784e-15	1.30792e-12	down	yes
126825	i	chr13	.	51507393	51507792	MSTRG.64377.1	1	400	MSTRG.64377	INTS6-AS1	0.000202397	-12.2705	7.58784e-15	1.30792e-12	down	yes
408667	u	chr7	.	153159992	153160296	MSTRG.204418.1	1	305	MSTRG.204418	.	0.00015423	-12.6626	7.58784e-15	1.30792e-12	down	yes
52478	u	chr1	.	208926311	208926518	MSTRG.27859.1	1	208	MSTRG.27859	.	0.000105063	-13.2165	7.58784e-15	1.30792e-12	down	yes
33775	u	chr1	.	73545694	73545964	MSTRG.18285.1	1	271	MSTRG.18285	.	0.000136961	-12.8339	7.58784e-15	1.30792e-12	down	yes
127734	u	chr13	.	61349052	61349390	MSTRG.65058.1	1	339	MSTRG.65058	.	0.000170908	-12.5145	7.58784e-15	1.30792e-12	down	yes
441553	u	chr9	.	119146046	119146500	MSTRG.223478.1	1	455	MSTRG.223478	.	0.000229571	-12.0888	7.58784e-15	1.30792e-12	down	yes
3281	i	X	.	26803761	26804334	MSTRG.2266.1	1	574	MSTRG.2266	VENTXP1	0.000290325	-11.75	7.58784e-15	1.30792e-12	down	yes
255410	i	chr2	.	184238229	184239004	MSTRG.121830.1	1	776	MSTRG.121830	AC020584	0.00042149	-11.2122	7.59183e-15	1.30792e-12	down	yes
268326	u	chr20	.	31240731	31240956	MSTRG.128547.1	1	226	MSTRG.128547	.	0.000116875	-13.0627	7.65891e-15	1.3107e-12	down	yes
288394	u	chr3	-	10001	10916	MSTRG.137644.1	6	330	MSTRG.137644	.	0.000182329	-12.4212	7.66165e-15	1.3107e-12	down	yes
50265	u	chr1	.	195638293	195638549	MSTRG.26836.1	1	257	MSTRG.26836	.	0.000141822	-12.7836	7.66165e-15	1.3107e-12	down	yes
65440	u	chr10	.	57364974	57365402	MSTRG.35227.1	1	429	MSTRG.35227	.	0.000237025	-12.0427	7.66165e-15	1.3107e-12	down	yes
121309	i	chr12	.	127503500	127503768	MSTRG.61521.1	1	269	MSTRG.61521	AC068787	0.000147729	-12.7248	7.66165e-15	1.3107e-12	down	yes
72903	i	chr10	.	110768244	110768608	MSTRG.39271.1	1	365	MSTRG.39271	RBM20	0.000201595	-12.2763	7.66165e-15	1.3107e-12	down	yes
373756	u	chr6	.	68029075	68029489	MSTRG.184778.1	1	415	MSTRG.184778	.	0.000228953	-12.0927	7.66165e-15	1.3107e-12	down	yes
231803	u	chr2	.	11009910	11010574	MSTRG.109101.1	1	665	MSTRG.109101	.	0.000366022	-11.4158	7.66165e-15	1.3107e-12	down	yes
320824	u	chr4	.	27749305	27749538	MSTRG.154218.1	1	234	MSTRG.154218	.	0.000128974	-12.9206	7.66165e-15	1.3107e-12	down	yes
13382	u	X	.	114453639	114453915	MSTRG.8953.1	1	277	MSTRG.8953	.	0.000152951	-12.6746	7.66165e-15	1.3107e-12	down	yes
113695	u	chr12	.	78585789	78586365	MSTRG.57786.1	1	577	MSTRG.57786	.	0.000318851	-11.6148	7.66165e-15	1.3107e-12	down	yes
300996	u	chr3	.	86203801	86204143	MSTRG.143769.1	1	343	MSTRG.143769	.	0.000189444	-12.3659	7.66165e-15	1.3107e-12	down	yes
413798	u	chr8	.	30016189	30016400	MSTRG.207080.1	1	212	MSTRG.207080	.	0.000117111	-13.0598	7.66165e-15	1.3107e-12	down	yes
430498	i	chr9	.	9585035	9585644	MSTRG.216807.1	1	610	MSTRG.216807	PTPRD	0.000335319	-11.5422	7.66165e-15	1.3107e-12	down	yes
45217	u	chr1	.	158783962	158784578	MSTRG.23915.1	1	617	MSTRG.23915	.	0.000339661	-11.5236	7.66165e-15	1.3107e-12	down	yes
194454	u	chr17	.	56741097	56741965	MSTRG.94332.1	1	869	MSTRG.94332	.	0.000477149	-11.0333	7.67012e-15	1.31118e-12	down	yes
146948	u	chr14	+	101245133	101245928	MSTRG.75708.1	2	616	MSTRG.75708	.	0.000337827	-11.5314	7.68901e-15	1.31308e-12	down	yes
357667	u	chr5	.	144564135	144564689	MSTRG.176581.1	1	555	MSTRG.176581	.	0.000305231	-11.6778	7.68901e-15	1.31308e-12	down	yes
84360	i	chr11	.	50178291	50178802	MSTRG.44781.1	1	512	MSTRG.44781	AC109635	0.000273976	-11.8337	7.83443e-15	1.33268e-12	down	yes
389905	u	chr7	.	23048461	23048756	MSTRG.194772.1	1	296	MSTRG.194772	.	0.000161709	-12.5943	7.84658e-15	1.33417e-12	down	yes
380317	u	chr6	.	121738648	121738854	MSTRG.189302.1	1	207	MSTRG.189302	.	0.000115343	-13.0818	7.88199e-15	1.33815e-12	down	yes
321232	u	chr4	.	32947430	32948187	MSTRG.154576.1	1	758	MSTRG.154576	.	0.000410078	-11.2518	7.88763e-15	1.33815e-12	down	yes
325587	i	chr4	+	73235991	73257903	MSTRG.157494.2	2	21869	MSTRG.157494	ANKRD17	307.254	8.26329	7.90212e-15	1.33815e-12	up	yes
273760	i	chr20	.	61636532	61636869	MSTRG.131023.1	1	338	MSTRG.131023	CDH4	0.000187787	-12.3786	7.92477e-15	1.33815e-12	down	yes
336785	u	chr4	.	164609620	164609888	MSTRG.164360.1	1	269	MSTRG.164360	.	0.000149192	-12.7105	7.92477e-15	1.33815e-12	down	yes
80824	u	chr11	.	25445713	25446472	MSTRG.42974.1	1	760	MSTRG.42974	.	0.000422206	-11.2098	7.92477e-15	1.33815e-12	down	yes
53756	u	chr1	.	218078029	218078760	MSTRG.28637.1	1	732	MSTRG.28637	.	0.000405733	-11.2672	7.92477e-15	1.33815e-12	down	yes
341310	u	chr5	.	13045482	13045782	MSTRG.167190.1	1	301	MSTRG.167190	.	0.000167245	-12.5457	7.92477e-15	1.33815e-12	down	yes
124800	i	chr13	.	38718290	38718630	MSTRG.63363.1	1	341	MSTRG.63363	FREM2	0.000188617	-12.3723	7.92477e-15	1.33815e-12	down	yes
320789	u	chr4	.	27286243	27286453	MSTRG.154149.1	1	211	MSTRG.154149	.	0.00011674	-13.0644	7.92477e-15	1.33815e-12	down	yes
420525	u	chr8	.	83503409	83503778	MSTRG.211103.1	1	370	MSTRG.211103	.	0.000205387	-12.2494	7.92477e-15	1.33815e-12	down	yes
47111	u	chr1	.	168654527	168655050	MSTRG.24784.1	1	524	MSTRG.24784	.	0.000290342	-11.75	7.92477e-15	1.33815e-12	down	yes
40766	u	chr1	-	143210289	143211220	MSTRG.22511.1	2	463	MSTRG.22511	.	0.000254961	-11.9374	7.98116e-15	1.34592e-12	down	yes
329728	i	chr4	.	104595649	104596073	MSTRG.159853.1	1	425	MSTRG.159853	CXXC4-AS1	0.000232141	-12.0727	7.99226e-15	1.34722e-12	down	yes
409885	i	chr8	.	3081932	3082394	MSTRG.205239.1	1	463	MSTRG.205239	CSMD1	0.000253172	-11.9476	8.13411e-15	1.36685e-12	down	yes
431440	i	chr9	.	19856771	19857314	MSTRG.217331.1	1	544	MSTRG.217331	AL158077	0.000301437	-11.6959	8.14149e-15	1.36685e-12	down	yes
125767	i	chr13	.	45575460	45575876	MSTRG.63955.1	1	417	MSTRG.63955	ERICH6B	0.000228442	-12.0959	8.14271e-15	1.36685e-12	down	yes
366108	i	chr6	.	21509351	21509736	MSTRG.181051.1	1	386	MSTRG.181051	LINC00581	0.000210564	-12.2135	8.14526e-15	1.36685e-12	down	yes
398188	u	chr7	.	86210220	86210665	MSTRG.199203.1	1	446	MSTRG.199203	.	0.000248323	-11.9755	8.22294e-15	1.36741e-12	down	yes
423605	i	chr8	.	105091050	105091399	MSTRG.212971.1	1	350	MSTRG.212971	ZFPM2	0.000194773	-12.3259	8.22407e-15	1.36741e-12	down	yes
230881	u	chr2	.	5415025	5415330	MSTRG.108674.1	1	306	MSTRG.108674	.	0.000171848	-12.5066	8.25899e-15	1.36741e-12	down	yes
73025	u	chr10	.	111765473	111765733	MSTRG.39339.1	1	261	MSTRG.39339	.	0.000146667	-12.7352	8.25899e-15	1.36741e-12	down	yes
173134	u	chr16	.	54583192	54583616	MSTRG.86359.1	1	425	MSTRG.86359	.	0.000238029	-12.0366	8.25899e-15	1.36741e-12	down	yes
283686	i	chr22	-	29977870	29978191	MSTRG.135770.1	2	295	MSTRG.135770	MTMR3	0.000165379	-12.5619	8.25899e-15	1.36741e-12	down	yes
55902	u	chr1	.	231075869	231076159	MSTRG.29764.1	1	291	MSTRG.29764	.	0.000163109	-12.5819	8.25899e-15	1.36741e-12	down	yes
114575	u	chr12	.	87122238	87122642	MSTRG.58468.1	1	405	MSTRG.58468	.	0.000227246	-12.1035	8.25899e-15	1.36741e-12	down	yes
166030	i	chr16	.	6259095	6259682	MSTRG.83398.1	1	588	MSTRG.83398	RBFOX1	0.000330218	-11.5643	8.25899e-15	1.36741e-12	down	yes
333295	u	chr4	.	135024415	135024798	MSTRG.162107.1	1	384	MSTRG.162107	.	0.000215425	-12.1805	8.25899e-15	1.36741e-12	down	yes
325672	u	chr4	.	73642641	73643136	MSTRG.157446.1	1	496	MSTRG.157446	.	0.000278846	-11.8082	8.25899e-15	1.36741e-12	down	yes
127532	u	chr13	.	58855608	58855871	MSTRG.64940.1	1	264	MSTRG.64940	.	0.000148536	-12.7169	8.25899e-15	1.36741e-12	down	yes
238019	u	chr2	.	55716768	55717490	MSTRG.112460.1	1	723	MSTRG.112460	.	0.000406821	-11.2633	8.25899e-15	1.36741e-12	down	yes
373483	i	chr6	.	64045145	64045588	MSTRG.184616.1	1	444	MSTRG.184616	EYS	0.000248867	-11.9723	8.25899e-15	1.36741e-12	down	yes
375043	i	chr6	.	77869814	77870220	MSTRG.185681.1	1	407	MSTRG.185681	MEI4	0.000229073	-12.0919	8.25899e-15	1.36741e-12	down	yes
70336	i	chr10	.	94707939	94708172	MSTRG.37928.1	1	234	MSTRG.37928	AL583836	0.000131506	-12.8926	8.25899e-15	1.36741e-12	down	yes
136053	i	chr14	.	30148948	30149537	MSTRG.69929.1	1	590	MSTRG.69929	PRKD1	0.000330992	-11.5609	8.25899e-15	1.36741e-12	down	yes
57400	u	chr1	.	242031601	242032232	MSTRG.30651.1	1	632	MSTRG.30651	.	0.000354679	-11.4612	8.25899e-15	1.36741e-12	down	yes
407660	i	chr7	.	148479348	148479827	MSTRG.203900.1	1	480	MSTRG.203900	AC006974	0.00026997	-11.8549	8.25899e-15	1.36741e-12	down	yes
109517	i	chr12	.	55515298	55515540	MSTRG.55850.1	1	243	MSTRG.55850	AC122685	0.000136708	-12.8366	8.25899e-15	1.36741e-12	down	yes
343421	u	chr5	.	34556070	34556314	MSTRG.168628.1	1	245	MSTRG.168628	.	0.000137217	-12.8313	8.25899e-15	1.36741e-12	down	yes
128289	u	chr13	.	68057892	68058252	MSTRG.65461.1	1	361	MSTRG.65461	.	0.000203452	-12.263	8.25899e-15	1.36741e-12	down	yes
134858	u	chr14	.	23695571	23695943	MSTRG.69427.1	1	373	MSTRG.69427	.	0.000209438	-12.2212	8.25899e-15	1.36741e-12	down	yes
380765	u	chr6	.	125952343	125952822	MSTRG.189598.1	1	480	MSTRG.189598	.	0.000269637	-11.8567	8.25899e-15	1.36741e-12	down	yes
272785	u	chr20	.	55404773	55405091	MSTRG.130547.1	1	319	MSTRG.130547	.	0.000178866	-12.4488	8.25899e-15	1.36741e-12	down	yes
401221	u	chr7	.	101335710	101336161	MSTRG.200517.1	1	452	MSTRG.200517	.	0.000251913	-11.9548	8.29975e-15	1.373e-12	down	yes
259457	i	chr2	.	215127900	215128758	MSTRG.124184.1	1	859	MSTRG.124184	ABCA12	0.000478936	-11.0279	8.33299e-15	1.37791e-12	down	yes
439361	u	chr9	.	100650252	100650501	MSTRG.221906.1	1	250	MSTRG.221906	.	0.000139979	-12.8025	8.37402e-15	1.38352e-12	down	yes
329601	i	chr4	.	103331302	103331930	MSTRG.159758.1	1	629	MSTRG.159758	LINC02428	0.000351535	-11.474	8.39237e-15	1.3848e-12	down	yes
328456	i	chr4	.	93687591	93687949	MSTRG.158966.1	1	359	MSTRG.158966	GRID2	0.000197213	-12.308	8.41508e-15	1.38738e-12	down	yes
49854	i	chr1	.	191009711	191010059	MSTRG.26525.1	1	349	MSTRG.26525	AL138927	0.000191112	-12.3533	8.42193e-15	1.38792e-12	down	yes
432159	u	chr9	.	26347768	26347970	MSTRG.217917.1	1	203	MSTRG.217917	.	0.000112084	-13.1231	8.42944e-15	1.38819e-12	down	yes
65378	u	chr10	.	56335119	56335324	MSTRG.35067.1	1	206	MSTRG.35067	.	0.000110951	-13.1378	8.43762e-15	1.38819e-12	down	yes
322534	i	chr4	.	44368509	44368750	MSTRG.155360.1	1	242	MSTRG.155360	KCTD8	0.000135842	-12.8458	8.45705e-15	1.39019e-12	down	yes
397681	i	chr7	.	79980155	79980377	MSTRG.198866.1	1	223	MSTRG.198866	GNAI1	0.000123193	-12.9868	8.512e-15	1.39388e-12	down	yes
24151	i	chr1	.	22599951	22600217	MSTRG.14043.1	1	267	MSTRG.14043	EPHA8	0.000149627	-12.7063	8.55516e-15	1.39388e-12	down	yes
75786	x	chr10	+	133566604	133566945	MSTRG.40858.1	2	271	MSTRG.40858	SYCE1	0.000153478	-12.6697	8.58003e-15	1.39388e-12	down	yes
53759	u	chr1	.	218115881	218116201	MSTRG.28638.1	1	321	MSTRG.28638	.	0.000182309	-12.4213	8.59003e-15	1.39388e-12	down	yes
241542	i	chr2	.	77238598	77239046	MSTRG.114179.1	1	449	MSTRG.114179	LRRTM4	0.000256237	-11.9302	8.59003e-15	1.39388e-12	down	yes
80007	i	chr11	.	18212450	18212726	MSTRG.42410.1	1	277	MSTRG.42410	SLC25A51P4	0.000157572	-12.6317	8.59003e-15	1.39388e-12	down	yes
377972	u	chr6	.	103982926	103983308	MSTRG.187817.1	1	383	MSTRG.187817	.	0.000218318	-12.1613	8.59003e-15	1.39388e-12	down	yes
138436	u	chr14	.	49468614	49469056	MSTRG.71622.1	1	443	MSTRG.71622	.	0.000252362	-11.9522	8.59003e-15	1.39388e-12	down	yes
99332	u	chr11	.	134601177	134601528	MSTRG.51320.1	1	352	MSTRG.51320	.	0.000199915	-12.2883	8.59003e-15	1.39388e-12	down	yes
252348	u	chr2	.	163009805	163010290	MSTRG.120194.1	1	486	MSTRG.120194	.	0.000275774	-11.8242	8.59003e-15	1.39388e-12	down	yes
276701	i	chr21	.	25324930	25325203	MSTRG.132606.1	1	274	MSTRG.132606	AP001341	0.000155519	-12.6506	8.59003e-15	1.39388e-12	down	yes
192131	u	chr17	.	45613669	45614064	MSTRG.93369.1	1	396	MSTRG.93369	.	0.000225728	-12.1131	8.59003e-15	1.39388e-12	down	yes
205830	u	chr18	.	41260527	41261412	MSTRG.99194.1	1	886	MSTRG.99194	.	0.000504993	-10.9514	8.59003e-15	1.39388e-12	down	yes
276535	u	chr21	.	23549126	23549365	MSTRG.132474.1	1	240	MSTRG.132474	.	0.000137013	-12.8334	8.59003e-15	1.39388e-12	down	yes
105368	u	chr12	.	33950848	33951161	MSTRG.54050.1	1	314	MSTRG.54050	.	0.000178731	-12.4499	8.59003e-15	1.39388e-12	down	yes
336804	u	chr4	.	164864375	164864708	MSTRG.164372.1	1	334	MSTRG.164372	.	0.000190336	-12.3592	8.59003e-15	1.39388e-12	down	yes
107398	i	chr12	.	49313731	49313949	MSTRG.55211.1	1	219	MSTRG.55211	AC125611	0.000125036	-12.9654	8.59003e-15	1.39388e-12	down	yes
33187	i	chr1	.	69803757	69804184	MSTRG.18185.1	1	428	MSTRG.18185	LRRC7	0.000243686	-12.0027	8.59003e-15	1.39388e-12	down	yes
439664	u	chr9	.	103964960	103965164	MSTRG.222261.1	1	205	MSTRG.222261	.	0.000117011	-13.0611	8.59003e-15	1.39388e-12	down	yes
342227	i	chr5	.	21903716	21903975	MSTRG.167835.1	1	260	MSTRG.167835	CDH12	0.000147809	-12.724	8.59003e-15	1.39388e-12	down	yes
336473	u	chr4	.	160132058	160132889	MSTRG.164119.1	1	832	MSTRG.164119	.	0.000472401	-11.0477	8.59003e-15	1.39388e-12	down	yes
117349	u	chr12	.	107782719	107783297	MSTRG.59984.1	1	579	MSTRG.59984	.	0.00032963	-11.5669	8.59003e-15	1.39388e-12	down	yes
60980	u	chr10	.	17267146	17267428	MSTRG.32464.1	1	283	MSTRG.32464	.	0.000157324	-12.634	8.67612e-15	1.40577e-12	down	yes
420472	i	chr8	.	82836121	82836981	MSTRG.211083.1	1	861	MSTRG.211083	AC060765	0.000481657	-11.0197	8.69415e-15	1.40756e-12	down	yes
329664	u	chr4	.	103946207	103946462	MSTRG.159793.1	1	256	MSTRG.159793	.	0.000143092	-12.7708	8.70269e-15	1.40807e-12	down	yes
36060	u	chr1	.	91495446	91495712	MSTRG.20018.1	1	267	MSTRG.20018	.	0.000143837	-12.7633	8.75911e-15	1.41518e-12	down	yes
390289	u	chr7	-	25577156	25587984	MSTRG.194989.6	2	10790	MSTRG.194989	.	0.00258229	-8.59713	8.76114e-15	1.41518e-12	down	yes
341270	u	chr5	.	12542982	12543530	MSTRG.167164.1	1	549	MSTRG.167164	.	0.000312232	-11.6451	8.7841e-15	1.41807e-12	down	yes
126484	o	chr13	-	49974773	49990974	MSTRG.64394.13	2	11138	MSTRG.64394	DLEU2	594.423	9.21534	8.79105e-15	1.41826e-12	up	yes
954	i	X	.	7640278	7641276	MSTRG.639.1	1	999	MSTRG.639	STS	0.000557543	-10.8086	8.84783e-15	1.42624e-12	down	yes
65655	u	chr10	.	59392079	59392387	MSTRG.35367.1	1	309	MSTRG.35367	.	0.000177366	-12.461	8.90844e-15	1.43439e-12	down	yes
170605	u	chr16	.	30151562	30151891	MSTRG.85152.1	1	330	MSTRG.85152	.	0.000188327	-12.3745	8.90938e-15	1.43439e-12	down	yes
95883	u	chr11	.	115572532	115572753	MSTRG.49737.1	1	222	MSTRG.49737	.	0.000126664	-12.9467	8.91725e-15	1.43447e-12	down	yes
14240	i	X	.	121187098	121187421	MSTRG.9626.1	1	324	MSTRG.9626	AC002377	0.000185939	-12.3929	8.91725e-15	1.43447e-12	down	yes
271840	u	chr20	.	48850689	48851220	MSTRG.129952.1	1	532	MSTRG.129952	.	0.000291959	-11.7419	8.92651e-15	1.43537e-12	down	yes
352283	i	chr5	+	107559323	107591828	MSTRG.173860.4	2	30556	MSTRG.173860	EFNA5	490.086	8.93689	8.98236e-15	1.44317e-12	up	yes
397598	j	chr7	+	79453673	79468896	MSTRG.198943.11	5	9690	MSTRG.198943	MAGI2-AS3	0.00131409	-9.57172	8.99271e-15	1.44423e-12	down	yes
16741	u	X	.	145411914	145412511	MSTRG.11351.1	1	598	MSTRG.11351	.	0.000339812	-11.523	8.99829e-15	1.44454e-12	down	yes
246674	i	chr2	.	114881105	114881379	MSTRG.116769.1	1	275	MSTRG.116769	DPP10	0.000157421	-12.6331	9.01897e-15	1.44726e-12	down	yes
273758	i	chr20	.	61620285	61620505	MSTRG.131021.1	1	221	MSTRG.131021	CDH4	0.000124398	-12.9727	9.03139e-15	1.44842e-12	down	yes
143866	i	chr14	.	81729821	81730401	MSTRG.74226.1	1	581	MSTRG.74226	LINC02311	0.000294911	-11.7274	9.10508e-15	1.45322e-12	down	yes
406167	i	chr7	+	138951044	138971241	MSTRG.203221.2	2	19878	MSTRG.203221	KIAA1549	0.00510689	-7.61334	9.12503e-15	1.45322e-12	down	yes
138399	u	chr14	.	48950201	48950486	MSTRG.71515.1	1	286	MSTRG.71515	.	0.000164603	-12.5687	9.13832e-15	1.45322e-12	down	yes
66021	u	chr10	.	63021401	63021689	MSTRG.35629.1	1	289	MSTRG.35629	.	0.000166617	-12.5512	9.13832e-15	1.45322e-12	down	yes
92765	u	chr11	.	90940869	90941366	MSTRG.47958.1	1	498	MSTRG.47958	.	0.000282426	-11.7898	9.14464e-15	1.45322e-12	down	yes
362671	i	chr5	.	178798060	178798324	MSTRG.179397.1	1	265	MSTRG.179397	AACSP1	0.00015208	-12.6829	9.15431e-15	1.45322e-12	down	yes
255734	i	chr2	.	187767938	187768145	MSTRG.122142.1	1	208	MSTRG.122142	LINC01090	0.000116198	-13.0711	9.16616e-15	1.45322e-12	down	yes
384423	u	chr6	.	153148159	153148398	MSTRG.191622.1	1	240	MSTRG.191622	.	0.000134263	-12.8626	9.16616e-15	1.45322e-12	down	yes
247763	u	chr2	.	126068798	126069095	MSTRG.117496.1	1	298	MSTRG.117496	.	0.000166099	-12.5557	9.16616e-15	1.45322e-12	down	yes
410045	u	chr8	.	5318401	5318819	MSTRG.205086.1	1	419	MSTRG.205086	.	0.000233419	-12.0648	9.16616e-15	1.45322e-12	down	yes
207587	i	chr18	.	55615649	55616130	MSTRG.100263.1	1	482	MSTRG.100263	TCF4	0.000268235	-11.8642	9.16616e-15	1.45322e-12	down	yes
208218	i	chr18	.	59475301	59475635	MSTRG.100404.1	1	335	MSTRG.100404	CCBE1	0.000187097	-12.3839	9.16616e-15	1.45322e-12	down	yes
166427	i	chr16	.	9488082	9488466	MSTRG.83574.1	1	385	MSTRG.83574	AC012178	0.000215173	-12.1822	9.16616e-15	1.45322e-12	down	yes
417295	i	chr8	.	57180593	57180885	MSTRG.209071.1	1	293	MSTRG.209071	LINC01606	0.000163985	-12.5742	9.16616e-15	1.45322e-12	down	yes
137750	u	chr14	.	42068308	42068626	MSTRG.70848.1	1	319	MSTRG.70848	.	0.00017754	-12.4596	9.16616e-15	1.45322e-12	down	yes
340468	u	chr5	.	5634804	5635496	MSTRG.166629.1	1	693	MSTRG.166629	.	0.000386804	-11.3361	9.16616e-15	1.45322e-12	down	yes
238903	i	chr2	.	62543444	62544340	MSTRG.113065.1	1	897	MSTRG.113065	AC092155	0.000501677	-10.961	9.16616e-15	1.45322e-12	down	yes
106330	i	chr12	.	45069537	45069788	MSTRG.54712.1	1	252	MSTRG.54712	AC008127	0.000140619	-12.7959	9.16616e-15	1.45322e-12	down	yes
267411	u	chr20	.	22926477	22926843	MSTRG.128104.1	1	367	MSTRG.128104	.	0.000204647	-12.2546	9.16616e-15	1.45322e-12	down	yes
242869	u	chr2	.	87829553	87830505	MSTRG.114932.1	1	953	MSTRG.114932	.	0.000533464	-10.8723	9.16616e-15	1.45322e-12	down	yes
40134	u	chr1	.	118671480	118671767	MSTRG.22207.1	1	288	MSTRG.22207	.	0.000163212	-12.581	9.1687e-15	1.45322e-12	down	yes
322550	u	chr4	.	44581256	44581543	MSTRG.155371.1	1	288	MSTRG.155371	.	0.00016346	-12.5788	9.17371e-15	1.45322e-12	down	yes
351573	u	chr5	.	100199473	100199823	MSTRG.173345.1	1	351	MSTRG.173345	.	0.000202227	-12.2717	9.17505e-15	1.45322e-12	down	yes
373478	i	chr6	.	63903220	63903626	MSTRG.184611.1	1	407	MSTRG.184611	EYS	0.000230036	-12.0859	9.20313e-15	1.45708e-12	down	yes
68056	u	chr10	.	76822897	76823102	MSTRG.36628.1	1	206	MSTRG.36628	.	0.000118554	-13.0422	9.20746e-15	1.45717e-12	down	yes
68190	o	chr10	+	77350644	77362371	MSTRG.36769.3	2	11638	MSTRG.36769	KCNMA1-AS3	614.565	9.26342	9.23565e-15	1.46045e-12	up	yes
79166	i	chr11	.	12652400	12652671	MSTRG.42056.1	1	272	MSTRG.42056	AC107881	0.000156582	-12.6408	9.27063e-15	1.46361e-12	down	yes
50663	u	chr1	.	199667698	199668474	MSTRG.27092.1	1	777	MSTRG.27092	.	0.000445343	-11.1328	9.31793e-15	1.4696e-12	down	yes
165127	j	chr16	-	3115214	3134882	MSTRG.83033.11	4	2322	MSTRG.83033	ZNF213-AS1	0.000754161	-10.3728	9.34868e-15	1.47237e-12	down	yes
255224	u	chr2	.	182629954	182630186	MSTRG.121634.1	1	233	MSTRG.121634	.	0.000134313	-12.8621	9.35746e-15	1.47316e-12	down	yes
57354	i	chr1	.	241689707	241690085	MSTRG.30711.1	1	379	MSTRG.30711	WDR64	0.000217763	-12.165	9.37952e-15	1.47544e-12	down	yes
536	i	X	.	3091824	3092050	MSTRG.293.1	1	227	MSTRG.293	ARSF	0.000123027	-12.9887	9.38443e-15	1.47562e-12	down	yes
66328	i	chr10	.	65950414	65950865	MSTRG.35844.1	1	452	MSTRG.35844	CTNNA3	0.000245295	-11.9932	9.40079e-15	1.4776e-12	down	yes
349742	u	chr5	.	86488662	86488889	MSTRG.172315.1	1	228	MSTRG.172315	.	0.000130332	-12.9055	9.46128e-15	1.48472e-12	down	yes
204094	i	chr18	.	26190679	26191194	MSTRG.97965.1	1	516	MSTRG.97965	PSMA8	0.000295385	-11.7251	9.46128e-15	1.48472e-12	down	yes
300618	i	chr3	.	81085629	81085909	MSTRG.143510.1	1	281	MSTRG.143510	LINC02027	0.000161571	-12.5955	9.49614e-15	1.48959e-12	down	yes
209023	u	chr18	.	67115051	67115254	MSTRG.100948.1	1	204	MSTRG.100948	.	0.000116553	-13.0667	9.65801e-15	1.51013e-12	down	yes
393878	u	chr7	.	49465202	49465560	MSTRG.196905.1	1	359	MSTRG.196905	.	0.000205909	-12.2457	9.69662e-15	1.51496e-12	down	yes
219559	i	chr19	.	28622725	28622969	MSTRG.104965.1	1	245	MSTRG.104965	AC005394	0.000137677	-12.8264	9.70682e-15	1.51595e-12	down	yes
58500	i	chr10	+	608730	622389	MSTRG.31233.4	2	13599	MSTRG.31233	DIP2C	465.303	8.86203	9.89355e-15	1.5408e-12	up	yes
105596	u	chr12	.	39185819	39186297	MSTRG.54196.1	1	479	MSTRG.54196	.	0.000272753	-11.8401	1.00638e-14	1.56358e-12	down	yes
114762	u	chr12	.	88963627	88964017	MSTRG.58620.1	1	391	MSTRG.58620	.	0.00022698	-12.1051	1.03574e-14	1.60537e-12	down	yes
63663	u	chr10	.	38821017	38821831	MSTRG.34161.1	1	815	MSTRG.34161	.	0.000383558	-11.3483	1.04739e-14	1.62213e-12	down	yes
144317	u	chr14	.	87148309	87148597	MSTRG.74594.1	1	289	MSTRG.74594	.	0.00016743	-12.5442	1.05963e-14	1.63849e-12	down	yes
244647	i	chr2	-	101727656	101750457	MSTRG.115730.2	2	22694	MSTRG.115730	MAP4K4	270.574	8.07988	1.06269e-14	1.64192e-12	up	yes
346131	i	chr5	+	59867500	59928814	MSTRG.170357.2	2	43505	MSTRG.170357	PDE4D	159.602	7.31834	1.06756e-14	1.64815e-12	up	yes
93523	i	chr11	.	96596006	96596648	MSTRG.48371.1	1	643	MSTRG.48371	AP003066	0.000364788	-11.4207	1.11588e-14	1.71733e-12	down	yes
331209	i	chr4	.	116124941	116125456	MSTRG.160751.1	1	516	MSTRG.160751	AC027613	0.000286094	-11.7712	1.17765e-14	1.79963e-12	down	yes
180210	o	chr16	+	89296021	89301272	MSTRG.89410.7	3	4739	MSTRG.89410	AC137932	1413.54	10.4651	1.18798e-14	1.81117e-12	up	yes
259360	i	chr2	.	214527251	214528048	MSTRG.124123.1	1	798	MSTRG.124123	AC068051	0.000477526	-11.0321	1.21107e-14	1.84333e-12	down	yes
16614	i	X	.	143506676	143507039	MSTRG.11243.1	1	364	MSTRG.11243	AC239727	0.00018743	-12.3814	1.26573e-14	1.91626e-12	down	yes
377665	u	chr6	.	99647623	99648264	MSTRG.187527.1	1	642	MSTRG.187527	.	0.000388805	-11.3287	1.28827e-14	1.94737e-12	down	yes
332809	u	chr4	.	129220354	129220706	MSTRG.161773.1	1	353	MSTRG.161773	.	0.00021589	-12.1774	1.28963e-14	1.94866e-12	down	yes
391018	i	chr7	-	30373982	30380673	MSTRG.195309.2	2	6532	MSTRG.195309	AC006978	0.00158381	-9.30238	1.30926e-14	1.97451e-12	down	yes
161979	u	chr15	.	94205179	94205576	MSTRG.82027.1	1	398	MSTRG.82027	.	0.000174022	-12.4884	1.31793e-14	1.98453e-12	down	yes
185362	i	chr17	+	17852914	17855634	MSTRG.91055.1	2	2700	MSTRG.91055	TOM1L2	2279.08	11.1542	1.33601e-14	2.00634e-12	up	yes
359482	i	chr5	.	155920026	155920517	MSTRG.177636.1	1	492	MSTRG.177636	SGCD	0.000303068	-11.6881	1.34568e-14	2.01853e-12	down	yes
323845	o	chr4	-	55429185	55432475	MSTRG.156260.3	2	3128	MSTRG.156260	CLOCK	0.0015254	-9.3566	1.3846e-14	2.06739e-12	down	yes
245505	i	chr2	-	108552593	108603496	MSTRG.116241.2	3	18144	MSTRG.116241	LIMS1	0.00444919	-7.81224	1.39022e-14	2.0742e-12	down	yes
434245	u	chr9	-	40596655	40611251	MSTRG.219058.7	3	13258	MSTRG.219058	.	0.00588887	-7.40779	1.39668e-14	2.08303e-12	down	yes
71070	i	chr10	.	98576815	98577159	MSTRG.38269.1	1	345	MSTRG.38269	HPSE2	0.000179704	-12.4421	1.42725e-14	2.12538e-12	down	yes
93469	i	chr11	+	96245270	96275109	MSTRG.48350.9	2	29685	MSTRG.48350	MAML2	0.0076582	-7.02878	1.4402e-14	2.14141e-12	down	yes
246434	j	chr2	+	113236587	113273056	MSTRG.116564.26	6	8398	MSTRG.116564	PAX8-AS1	675.439	9.39968	1.46284e-14	2.17013e-12	up	yes
47612	j	chr1	-	172138798	172144364	MSTRG.25118.5	3	2499	MSTRG.25118	DNM3OS	0.000914856	-10.0942	1.55424e-14	2.29352e-12	down	yes
307762	o	chr3	+	138025612	138045391	MSTRG.147509.5	2	14008	MSTRG.147509	CLDN18	0.00521075	-7.58429	1.63574e-14	2.40305e-12	down	yes
180208	o	chr16	+	89296015	89300052	MSTRG.89410.5	2	3921	MSTRG.89410	AC137932	0.00105773	-9.88481	1.75173e-14	2.55792e-12	down	yes
171737	u	chr16	.	34957211	34957993	MSTRG.85647.1	1	783	MSTRG.85647	.	0.000519662	-10.9101	1.76555e-14	2.57521e-12	down	yes
435625	j	chr9	-	70387554	70408988	MSTRG.219974.3	3	10293	MSTRG.219974	KLF9	577.403	9.17343	1.85121e-14	2.68598e-12	up	yes
347281	j	chr5	+	69217887	69230158	MSTRG.170918.5	4	1424	MSTRG.170918	MRPS36	0.000477891	-11.031	1.85215e-14	2.68598e-12	down	yes
146337	i	chr14	+	99444963	99453841	MSTRG.75558.2	2	8814	MSTRG.75558	SETD3	993.626	9.95656	1.85248e-14	2.68598e-12	up	yes
349567	u	chr5	+	84540418	84553427	MSTRG.172209.2	2	12973	MSTRG.172209	.	473.854	8.8883	1.87426e-14	2.71352e-12	up	yes
358088	i	chr5	.	147682131	147682466	MSTRG.176921.1	1	336	MSTRG.176921	JAKMIP2	0.000174808	-12.4819	1.92164e-14	2.76268e-12	down	yes
133300	i	chr14	+	19680972	19681310	MSTRG.68929.1	1	339	MSTRG.68929	AL512310	0.000175931	-12.4727	1.92164e-14	2.76268e-12	down	yes
324323	u	chr4	.	59889078	59889345	MSTRG.156532.1	1	268	MSTRG.156532	.	0.000139181	-12.8108	1.92164e-14	2.76268e-12	down	yes
16146	i	X	.	137929525	137929925	MSTRG.10894.1	1	401	MSTRG.10894	Z96074	0.000208116	-12.2303	1.92164e-14	2.76268e-12	down	yes
811	u	X	.	6318684	6319223	MSTRG.477.1	1	540	MSTRG.477	.	0.000281722	-11.7934	1.92164e-14	2.76268e-12	down	yes
288450	i	chr3	.	299388	299694	MSTRG.137676.1	1	307	MSTRG.137676	CHL1	0.000159759	-12.6118	1.92164e-14	2.76268e-12	down	yes
106591	u	chr12	.	47045374	47046012	MSTRG.54851.1	1	639	MSTRG.54851	.	0.000332963	-11.5524	1.92164e-14	2.76268e-12	down	yes
113072	i	chr12	.	73124183	73124809	MSTRG.57367.1	1	627	MSTRG.57367	AC090503	0.000327271	-11.5772	1.92164e-14	2.76268e-12	down	yes
163072	u	chr15	+	101980515	101981163	MSTRG.82589.2	2	611	MSTRG.82589	.	0.000318956	-11.6144	1.92164e-14	2.76268e-12	down	yes
12370	i	X	.	104577475	104578180	MSTRG.8250.1	1	706	MSTRG.8250	IL1RAPL2	0.000366856	-11.4125	1.92164e-14	2.76268e-12	down	yes
53846	u	chr1	.	218806822	218807113	MSTRG.28713.1	1	292	MSTRG.28713	.	0.000151768	-12.6858	1.92164e-14	2.76268e-12	down	yes
10894	u	X	.	89764409	89764950	MSTRG.7262.1	1	542	MSTRG.7262	.	0.000358954	-11.4439	1.96318e-14	2.81722e-12	down	yes
91466	i	chr11	.	82093706	82094289	MSTRG.47187.1	1	584	MSTRG.47187	MIR4300HG	0.000379422	-11.3639	1.97936e-14	2.83524e-12	down	yes
139380	i	chr14	-	54603806	54623625	MSTRG.71997.3	2	19755	MSTRG.71997	SAMD4A	0.00968945	-6.68937	1.9962e-14	2.85205e-12	down	yes
353024	u	chr5	.	115077295	115077909	MSTRG.174277.1	1	615	MSTRG.174277	.	0.000279149	-11.8067	2.01855e-14	2.88187e-12	down	yes
195017	i	chr17	.	59224688	59225084	MSTRG.94557.1	1	397	MSTRG.94557	GDPD1	0.000204235	-12.2575	2.15123e-14	3.062e-12	down	yes
58536	o	chr10	+	667617	678561	MSTRG.31233.30	2	10778	MSTRG.31233	PRR26	0.00302379	-8.36943	2.18871e-14	3.10777e-12	down	yes
56458	i	chr1	+	235139606	235147323	MSTRG.30223.3	2	7558	MSTRG.30223	RBM34	1271.29	10.3121	2.26951e-14	3.21201e-12	up	yes
417729	i	chr8	-	60526132	60532561	MSTRG.209334.4	2	6252	MSTRG.209334	RAB2A	0.00179594	-9.12105	2.28952e-14	3.23097e-12	down	yes
93465	i	chr11	+	96183526	96202771	MSTRG.48350.6	2	19214	MSTRG.48350	MAML2	0.00646358	-7.27345	2.35882e-14	3.32037e-12	down	yes
245032	j	chr2	-	104746808	104755755	MSTRG.115930.3	3	1432	MSTRG.115930	LINC01114	0.000834991	-10.226	2.38527e-14	3.35519e-12	down	yes
151885	j	chr15	-	40690533	40695160	MSTRG.77909.8	3	2949	MSTRG.77909	RAD51-AS1	0.000993451	-9.97526	2.38755e-14	3.35718e-12	down	yes
386051	i	chr6	-	167017621	167022306	MSTRG.192648.2	2	4644	MSTRG.192648	CEP43	0.00149042	-9.39006	2.44725e-14	3.4288e-12	down	yes
394458	j	chr7	-	54692901	54759334	MSTRG.197320.1	5	577	MSTRG.197320	SEC61G	0.000196207	-12.3153	2.47031e-14	3.45738e-12	down	yes
341703	i	chr5	+	16583489	16600143	MSTRG.167577.2	2	16597	MSTRG.167577	RETREG1	0.00490663	-7.67105	2.54833e-14	3.55133e-12	down	yes
125026	i	chr13	+	40607605	40611145	MSTRG.63553.4	2	3512	MSTRG.63553	FOXO1	0.00205386	-8.92745	2.64127e-14	3.67037e-12	down	yes
165408	j	chr16	+	3662736	3665954	MSTRG.83109.15	2	3067	MSTRG.83109	DNASE1	1650.2	10.6884	2.64968e-14	3.68075e-12	up	yes
128246	u	chr13	.	67478843	67479090	MSTRG.65420.1	1	248	MSTRG.65420	.	0.000168309	-12.5366	2.71419e-14	3.76235e-12	down	yes
341618	i	chr5	-	15624929	15702875	MSTRG.167429.3	2	38842	MSTRG.167429	FBXL7	130.917	7.03251	2.73198e-14	3.78299e-12	up	yes
9657	u	X	.	76387598	76387962	MSTRG.6211.1	1	365	MSTRG.6211	.	0.00016943	-12.527	2.98681e-14	4.11109e-12	down	yes
275391	u	chr21	.	13802564	13802913	MSTRG.131831.1	1	350	MSTRG.131831	.	0.000242387	-12.0104	2.99462e-14	4.12039e-12	down	yes
263141	i	chr2	-	237734302	237745942	MSTRG.125967.5	2	11581	MSTRG.125967	LRRFIP1	425.689	8.73366	3.09752e-14	4.24588e-12	up	yes
308937	j	chr3	-	146515802	146521030	MSTRG.148121.6	3	1483	MSTRG.148121	PLSCR1	0.000928879	-10.0722	3.1275e-14	4.27613e-12	down	yes
390704	i	chr7	+	28161423	28179840	MSTRG.195122.2	2	18388	MSTRG.195122	JAZF1	313.936	8.29433	3.13732e-14	4.28655e-12	up	yes
444089	i	chr9	-	131420518	131426333	MSTRG.224492.4	2	5796	MSTRG.224492	PRRC2B	0.00185605	-9.07355	3.34964e-14	4.52916e-12	down	yes
103990	o	chr12	+	24215822	24246538	MSTRG.53492.2	2	30676	MSTRG.53492	SOX5-AS1	0.0101889	-6.61686	3.42695e-14	4.62091e-12	down	yes
255399	i	chr2	.	184106068	184106343	MSTRG.121817.1	1	276	MSTRG.121817	AC096555	0.00012093	-13.0135	3.59752e-14	4.82594e-12	down	yes
219502	i	chr19	.	27983633	27983889	MSTRG.105075.1	1	257	MSTRG.105075	AC005357	0.00019659	-12.3125	3.60549e-14	4.83439e-12	down	yes
335181	i	chr4	-	151105133	151116220	MSTRG.163380.2	2	10777	MSTRG.163380	SH3D19	0.00350078	-8.15811	3.65293e-14	4.8902e-12	down	yes
292023	i	chr3	+	24464302	24493920	MSTRG.139510.2	2	29592	MSTRG.139510	THRB	0.0112708	-6.47127	3.68392e-14	4.92219e-12	down	yes
25148	i	chr1	-	26709720	26726494	MSTRG.14414.3	2	16424	MSTRG.14414	ARID1A	281.629	8.13765	3.83334e-14	5.10027e-12	up	yes
79007	i	chr11	+	11548719	11567088	MSTRG.41973.5	2	18016	MSTRG.41973	GALNT18	0.00623076	-7.32638	3.98582e-14	5.28517e-12	down	yes
406290	o	chr7	-	139561828	139572628	MSTRG.203278.2	2	10727	MSTRG.203278	HIPK2	425.926	8.73446	4.07128e-14	5.38022e-12	up	yes
65056	i	chr10	-	51520333	51561725	MSTRG.35023.2	2	41358	MSTRG.35023	PRKG1	0.0111414	-6.48792	4.0876e-14	5.39632e-12	down	yes
43592	o	chr1	-	153992385	153994577	MSTRG.23467.2	2	2054	MSTRG.23467	NUP210L	0.000720899	-10.4379	4.17152e-14	5.49598e-12	down	yes
263137	o	chr2	-	237728426	237734301	MSTRG.125967.1	2	5845	MSTRG.125967	AC012076	811.194	9.6639	4.21424e-14	5.54706e-12	up	yes
72527	u	chr10	.	107541837	107542180	MSTRG.39031.1	1	344	MSTRG.39031	.	0.0002651	-11.8812	4.28762e-14	5.63754e-12	down	yes
290061	j	chr3	+	10115706	10127221	MSTRG.138524.2	3	1148	MSTRG.138524	BRK1	0.000832578	-10.2301	4.37363e-14	5.73711e-12	down	yes
244166	j	chr2	-	98599314	98608515	MSTRG.115505.2	3	1682	MSTRG.115505	COA5	0.000636559	-10.6174	4.4462e-14	5.79781e-12	down	yes
241991	u	chr2	.	82452461	82452891	MSTRG.114418.1	1	431	MSTRG.114418	.	0.000243548	-12.0035	4.45846e-14	5.79781e-12	down	yes
342939	u	chr5	.	30319785	30320043	MSTRG.168356.1	1	259	MSTRG.168356	.	0.000146757	-12.7343	4.45846e-14	5.79781e-12	down	yes
53415	i	chr1	.	214982303	214982813	MSTRG.28361.1	1	511	MSTRG.28361	AC099563	0.000288371	-11.7598	4.45846e-14	5.79781e-12	down	yes
14841	i	X	.	128387594	128387864	MSTRG.10039.1	1	271	MSTRG.10039	AL008633	0.000153543	-12.6691	4.45846e-14	5.79781e-12	down	yes
328649	u	chr4	.	96118863	96119504	MSTRG.159184.1	1	642	MSTRG.159184	.	0.0003631	-11.4273	4.45846e-14	5.79781e-12	down	yes
352383	i	chr5	+	109341381	109343282	MSTRG.173927.4	3	1274	MSTRG.173927	PJA2	0.000718198	-10.4433	4.45846e-14	5.79781e-12	down	yes
417353	u	chr8	.	57454053	57454826	MSTRG.209063.1	1	774	MSTRG.209063	.	0.000439118	-11.1531	4.45846e-14	5.79781e-12	down	yes
37883	i	chr1	.	105953721	105954446	MSTRG.21128.1	1	726	MSTRG.21128	LINC01677	0.000410245	-11.2512	4.45846e-14	5.79781e-12	down	yes
353734	i	chr5	.	121230827	121231409	MSTRG.174788.1	1	583	MSTRG.174788	AC008568	0.000328828	-11.5704	4.45846e-14	5.79781e-12	down	yes
399891	u	chr7	.	97800083	97800298	MSTRG.200098.1	1	216	MSTRG.200098	.	0.000122523	-12.9947	4.45846e-14	5.79781e-12	down	yes
373216	u	chr6	.	60625887	60626140	MSTRG.184268.1	1	254	MSTRG.184268	.	0.000143669	-12.765	4.45846e-14	5.79781e-12	down	yes
427709	i	chr8	.	137028381	137028612	MSTRG.215525.1	1	232	MSTRG.215525	LINC02055	0.000131086	-12.8972	4.45846e-14	5.79781e-12	down	yes
163826	u	chr16	.	1151421	1151761	MSTRG.82757.1	1	341	MSTRG.82757	.	0.000192725	-12.3412	4.45846e-14	5.79781e-12	down	yes
205851	i	chr18	.	41499754	41499990	MSTRG.99228.1	1	237	MSTRG.99228	KC6	0.000134459	-12.8606	4.45846e-14	5.79781e-12	down	yes
109095	i	chr12	.	53808402	53808694	MSTRG.55664.1	1	293	MSTRG.55664	AC076968	0.000165817	-12.5581	4.45846e-14	5.79781e-12	down	yes
259352	i	chr2	.	214416125	214416370	MSTRG.124115.1	1	246	MSTRG.124115	AC068051	0.000138873	-12.8139	4.45846e-14	5.79781e-12	down	yes
284948	i	chr22	+	35849477	35875794	MSTRG.136302.3	2	26292	MSTRG.136302	RBFOX2	0.010048	-6.63694	4.54163e-14	5.89615e-12	down	yes
267855	j	chr20	+	25687254	25696112	MSTRG.128312.12	2	8215	MSTRG.128312	ZNF337-AS1	450.661	8.8159	4.57411e-14	5.92651e-12	up	yes
333786	j	chr4	-	139289979	139302415	MSTRG.162488.12	5	2017	MSTRG.162488	NDUFC1	0.00101454	-9.94496	4.79035e-14	6.16784e-12	down	yes
75010	i	chr10	-	126919406	126937967	MSTRG.40421.2	2	16657	MSTRG.40421	DOCK1	260.43	8.02475	4.8218e-14	6.20629e-12	up	yes
354744	i	chr5	-	129934224	129942112	MSTRG.175505.2	2	7756	MSTRG.175505	CHSY3	0.0049094	-7.67024	4.84496e-14	6.232e-12	down	yes
438332	j	chr9	+	94166997	94182229	MSTRG.221524.8	2	6704	MSTRG.221524	MIRLET7A1HG	0.00247111	-8.66063	4.97182e-14	6.37424e-12	down	yes
263916	i	chr2	+	241281229	241290659	MSTRG.126259.3	2	9264	MSTRG.126259	HDLBP	466.493	8.86571	5.0066e-14	6.41248e-12	up	yes
356316	i	chr5	-	138776103	138777875	MSTRG.176181.5	2	1584	MSTRG.176181	CTNNA1	2158.84	11.076	5.15527e-14	6.5749e-12	up	yes
128587	u	chr13	.	71892602	71893043	MSTRG.65812.1	1	442	MSTRG.65812	.	0.000256517	-11.9287	5.22173e-14	6.65097e-12	down	yes
21801	i	chr1	-	9299981	9313625	MSTRG.13017.5	2	11585	MSTRG.13017	SPSB1	0.00747904	-7.06293	5.2771e-14	6.70653e-12	down	yes
162662	j	chr15	-	99791857	99806956	MSTRG.82474.4	5	1751	MSTRG.82474	DNM1P46	0.000947361	-10.0438	5.50549e-14	6.97152e-12	down	yes
228477	j	chr19	-	54444813	54449045	MSTRG.107841.10	3	1758	MSTRG.107841	LENG8-AS1	0.000639596	-10.6106	5.51108e-14	6.97633e-12	down	yes
433104	i	chr9	+	34407395	34416836	MSTRG.218532.3	2	6918	MSTRG.218532	FAM219A	587.271	9.19788	5.61211e-14	7.09046e-12	up	yes
69368	j	chr10	-	87244071	87342612	MSTRG.37389.17	9	2507	MSTRG.37389	NUTM2A-AS1	1311.09	10.3566	5.6263e-14	7.10608e-12	up	yes
76981	o	chr11	-	2647805	2663391	MSTRG.41131.4	2	14813	MSTRG.41131	KCNQ1OT1	0.010399	-6.58741	7.02625e-14	8.75263e-12	down	yes
178141	i	chr16	-	78752149	78793583	MSTRG.88460.5	2	40655	MSTRG.88460	WWOX	80.3325	6.32791	7.75712e-14	9.60189e-12	up	yes
346487	u	chr5	.	62928574	62929195	MSTRG.170445.1	1	622	MSTRG.170445	.	0.000327005	-11.5784	7.83756e-14	9.68612e-12	down	yes
58542	i	chr10	+	670815	678561	MSTRG.31233.36	3	7585	MSTRG.31233	DIP2C	0.00325458	-8.26331	7.96411e-14	9.82077e-12	down	yes
271851	i	chr20	+	48925518	48928188	MSTRG.129964.4	2	2604	MSTRG.129964	ARFGEF2	1120.67	10.1301	8.6072e-14	1.05439e-11	up	yes
60294	i	chr10	-	12435270	12454394	MSTRG.32221.10	2	17834	MSTRG.32221	CAMK1D	191.166	7.57868	8.85378e-14	1.0829e-11	up	yes
151882	j	chr15	-	40686375	40695160	MSTRG.77909.5	3	2459	MSTRG.77909	RAD51-AS1	0.00120368	-9.69833	9.00445e-14	1.09901e-11	down	yes
323641	x	chr4	-	54033157	54042745	MSTRG.156204.7	2	8895	MSTRG.156204	AC058822	0.00379076	-8.0433	9.12573e-14	1.11234e-11	down	yes
160737	o	chr15	+	88641985	88650234	MSTRG.81622.9	2	8063	MSTRG.81622	ISG20	425.666	8.73358	9.28476e-14	1.12785e-11	up	yes
20460	i	chr1	-	2146140	2147700	MSTRG.12464.3	2	1530	MSTRG.12464	PRKCZ	0.000737209	-10.4056	9.31503e-14	1.13118e-11	down	yes
396262	i	chr7	-	72899007	72923120	MSTRG.198389.2	2	23264	MSTRG.198389	POM121	0.00838188	-6.89851	9.52949e-14	1.15471e-11	down	yes
203052	i	chr18	-	13395765	13417666	MSTRG.97505.3	2	21585	MSTRG.97505	LDLRAD4	152.541	7.25306	1.05419e-13	1.26445e-11	up	yes
14015	j	X	-	119759648	119791630	MSTRG.9382.1	4	449	MSTRG.9382	RPL39	8192.46	13.0001	1.06288e-13	1.27371e-11	up	yes
138529	x	chr14	+	49843911	49863071	MSTRG.71626.18	2	533	MSTRG.71626	NEMF	2246.14	11.1332	1.07515e-13	1.28801e-11	up	yes
388855	i	chr7	.	13538349	13538656	MSTRG.194115.1	1	308	MSTRG.194115	AC011287	0.00014152	-12.7867	1.09644e-13	1.30991e-11	down	yes
431161	i	chr9	+	16479301	16498005	MSTRG.217163.3	2	18625	MSTRG.217163	BNC2	0.0127304	-6.29558	1.11477e-13	1.32937e-11	down	yes
27297	i	chr1	-	36227277	36236171	MSTRG.15355.5	2	4244	MSTRG.15355	THRAP3	639.048	9.31978	1.12812e-13	1.34365e-11	up	yes
68204	i	chr10	+	77472278	77474790	MSTRG.36774.3	2	2459	MSTRG.36774	KCNMA1	0.00121525	-9.68453	1.13792e-13	1.3549e-11	down	yes
141632	i	chr14	+	68954417	68968059	MSTRG.73158.2	2	13539	MSTRG.73158	ACTN1	249.458	7.96265	1.18965e-13	1.40921e-11	up	yes
65057	i	chr10	-	51561726	51579009	MSTRG.35023.3	2	17170	MSTRG.35023	PRKG1	0.00539162	-7.53507	1.1969e-13	1.4165e-11	down	yes
320443	u	chr4	+	24392120	24436175	MSTRG.153997.2	2	39999	MSTRG.153997	.	0.0125644	-6.31452	1.1969e-13	1.4165e-11	down	yes
303696	j	chr3	-	112499379	112562046	MSTRG.145483.5	3	724	MSTRG.145483	ATG3	3673.89	11.8431	1.20721e-13	1.42662e-11	up	yes
307601	i	chr3	+	136723719	136727926	MSTRG.147478.4	2	4012	MSTRG.147478	STAG1	0.00206331	-8.92083	1.2945e-13	1.5205e-11	down	yes
306432	i	chr3	+	129172495	129174387	MSTRG.146838.3	2	1869	MSTRG.146838	CNBP	0.000972929	-10.0054	1.32862e-13	1.55824e-11	down	yes
341621	i	chr5	-	15634340	15670540	MSTRG.167429.5	2	36165	MSTRG.167429	FBXL7	0.0150607	-6.05307	1.33979e-13	1.56945e-11	down	yes
58490	i	chr10	+	596563	604063	MSTRG.31232.3	2	7418	MSTRG.31232	DIP2C	412.394	8.68788	1.37533e-13	1.60723e-11	up	yes
309351	i	chr3	+	149612552	149623130	MSTRG.148336.5	2	7762	MSTRG.148336	WWTR1	0.00239757	-8.70421	1.39412e-13	1.62822e-11	down	yes
395327	j	chr7	+	64877785	64889939	MSTRG.197799.3	2	1419	MSTRG.197799	ZNF273	0.000548206	-10.833	1.4209e-13	1.65652e-11	down	yes
274908	i	chr21	-	8396770	8401959	MSTRG.131506.5	2	645	MSTRG.131506	FP236383	3860.49	11.9146	1.50859e-13	1.74937e-11	up	yes
139383	i	chr14	-	54652807	54678575	MSTRG.71997.5	2	25593	MSTRG.71997	SAMD4A	0.0131862	-6.24483	1.58145e-13	1.83005e-11	down	yes
274897	o	chr21	-	8392297	8438819	MSTRG.131491.13	3	2592	MSTRG.131491	FP236383	1149.57	10.1669	1.58523e-13	1.83388e-11	up	yes
411176	j	chr8	+	12194958	12205764	MSTRG.205982.3	4	1663	MSTRG.205982	AC145124	1752.35	10.7751	1.58887e-13	1.83646e-11	up	yes
411022	j	chr8	+	11769890	11787345	MSTRG.205918.7	4	2166	MSTRG.205918	NEIL2	0.00108008	-9.85464	1.63302e-13	1.88582e-11	down	yes
287236	u	chr22	.	45105428	45106206	MSTRG.137221.1	1	779	MSTRG.137221	.	0.000398457	-11.2933	1.7854e-13	2.05209e-11	down	yes
185313	i	chr17	-	17725156	17735092	MSTRG.91046.2	2	9722	MSTRG.91046	RAI1	0.00506555	-7.62507	1.82946e-13	2.10026e-11	down	yes
363649	o	chr6	+	2224134	2243682	MSTRG.179777.5	2	17827	MSTRG.179777	AL035693	139.076	7.11973	1.90478e-13	2.17969e-11	up	yes
188292	i	chr17	+	32538487	32557140	MSTRG.92142.3	2	14036	MSTRG.92142	MYO1D	0.00816273	-6.93673	1.94603e-13	2.22364e-11	down	yes
231473	i	chr2	-	9228091	9251364	MSTRG.109016.4	2	22987	MSTRG.109016	ASAP2	100.668	6.65345	1.94874e-13	2.22543e-11	up	yes
352281	i	chr5	+	107535627	107559322	MSTRG.173860.2	2	23595	MSTRG.173860	EFNA5	259.629	8.02031	2.00703e-13	2.28733e-11	up	yes
305681	j	chr3	-	125907822	125914419	MSTRG.146487.34	3	5071	MSTRG.146487	AC092903	0.00270433	-8.53052	2.0136e-13	2.29348e-11	down	yes
69450	i	chr10	-	87689833	87701197	MSTRG.37410.2	2	9870	MSTRG.37410	PAPSS2	228.291	7.83473	2.15459e-13	2.44409e-11	up	yes
379	u	X	+	2185184	2187313	MSTRG.210.2	3	1927	MSTRG.210	.	1235.22	10.2706	2.20293e-13	2.49675e-11	up	yes
356554	i	chr5	-	139577009	139585766	MSTRG.176238.2	2	6660	MSTRG.176238	UBE2D2	0.00423682	-7.8828	2.35706e-13	2.65834e-11	down	yes
118785	u	chr12	.	115032294	115032682	MSTRG.60519.1	1	389	MSTRG.60519	.	0.000198578	-12.298	2.48961e-13	2.79413e-11	down	yes
126485	j	chr13	-	49974773	49992358	MSTRG.64394.12	4	10848	MSTRG.64394	DLEU2	251.666	7.97537	2.53996e-13	2.84573e-11	up	yes
274939	u	chr21	.	8566364	8566791	MSTRG.131436.1	1	428	MSTRG.131436	.	4980.47	12.2821	2.62591e-13	2.93614e-11	up	yes
433105	i	chr9	+	34429413	34457413	MSTRG.218532.4	2	27796	MSTRG.218532	FAM219A	100.384	6.64938	2.80784e-13	3.11903e-11	up	yes
245595	o	chr2	-	109133984	109142979	MSTRG.116286.2	2	8831	MSTRG.116286	MIR4265	272.435	8.08977	3.05486e-13	3.3714e-11	up	yes
317295	i	chr4	+	1219923	1223117	MSTRG.152177.3	2	3106	MSTRG.152177	CTBP1	764.183	9.57777	3.19123e-13	3.511e-11	up	yes
122543	o	chr13	-	20071439	20079291	MSTRG.62110.3	2	7829	MSTRG.62110	KRR1P1	257.144	8.00643	3.19428e-13	3.51139e-11	up	yes
129332	i	chr13	.	78377528	78377849	MSTRG.66366.1	1	322	MSTRG.66366	OBI1-AS1	0.000184457	-12.4044	3.56494e-13	3.89584e-11	down	yes
240070	j	chr2	-	69963282	69981337	MSTRG.113758.24	3	5945	MSTRG.113758	PCBP1-AS1	0.00375988	-8.0551	3.64299e-13	3.97447e-11	down	yes
368174	j	chr6	-	31172428	31176682	MSTRG.182088.4	3	3796	MSTRG.182088	PSORS1C3	593.39	9.21284	3.87437e-13	4.21162e-11	up	yes
167713	o	chr16	+	17398966	17428841	MSTRG.84123.2	2	29836	MSTRG.84123	AC009152	228.474	7.83588	3.98047e-13	4.32215e-11	up	yes
192501	i	chr17	+	47173593	47181057	MSTRG.93530.2	2	7433	MSTRG.93530	CDC27	269.329	8.07322	4.02596e-13	4.36791e-11	up	yes
423215	i	chr8	+	102403407	102411568	MSTRG.212739.5	2	7863	MSTRG.212739	UBR5	279.285	8.12559	4.44158e-13	4.79752e-11	up	yes
115775	j	chr12	-	96228484	96235650	MSTRG.59217.2	3	5169	MSTRG.59217	AC008149	469.281	8.87431	4.46726e-13	4.82392e-11	up	yes
268616	i	chr20	-	32373104	32376879	MSTRG.128693.2	2	3643	MSTRG.128693	ASXL1	610.931	9.25487	4.55834e-13	4.91462e-11	up	yes
263139	o	chr2	-	237728562	237745942	MSTRG.125967.3	2	15456	MSTRG.125967	AC012076	141.954	7.14928	4.65432e-13	5.00932e-11	up	yes
30113	i	chr1	-	47342676	47356271	MSTRG.16438.3	2	6757	MSTRG.16438	CMPK1	278.939	8.1238	4.96061e-13	5.32284e-11	up	yes
304115	i	chr3	+	114426552	114445520	MSTRG.145930.3	2	18804	MSTRG.145930	ZBTB20	108.081	6.75597	5.45625e-13	5.82112e-11	up	yes
195576	i	chr17	-	62655870	62657608	MSTRG.94849.4	2	1542	MSTRG.94849	MRC2	5508.39	12.4274	5.70954e-13	6.08637e-11	up	yes
52366	j	chr1	-	207804357	207823326	MSTRG.27793.9	4	12425	MSTRG.27793	MIR29B2CHG	159.834	7.32043	6.59772e-13	6.97044e-11	up	yes
203985	i	chr18	+	25295865	25302125	MSTRG.97948.2	2	6205	MSTRG.97948	ZNF521	308.736	8.27023	7.09313e-13	7.46961e-11	up	yes
58540	i	chr10	+	670417	678561	MSTRG.31233.34	2	8035	MSTRG.31233	DIP2C	288.021	8.17003	7.55586e-13	7.93765e-11	up	yes
407273	i	chr7	+	144329425	144342821	MSTRG.203759.2	2	13357	MSTRG.203759	AC074386	140.208	7.13142	7.62235e-13	8.00105e-11	up	yes
97434	j	chr11	-	122127480	122156371	MSTRG.50434.72	3	18121	MSTRG.50434	MIR100HG	235.484	7.87948	9.70863e-13	1.0088e-10	up	yes
397574	i	chr7	+	79240816	79260363	MSTRG.198939.3	2	19482	MSTRG.198939	MAGI2	0.00982531	-6.66928	9.90417e-13	1.02803e-10	down	yes
432132	u	chr9	.	25978553	25978978	MSTRG.217890.1	1	426	MSTRG.217890	.	0.00023095	-12.0801	9.9082e-13	1.02818e-10	down	yes
5114	u	X	.	45996408	45996739	MSTRG.3588.1	1	332	MSTRG.3588	.	0.000190249	-12.3598	9.96039e-13	1.03085e-10	down	yes
111234	u	chr12	.	60617944	60618704	MSTRG.56351.1	1	761	MSTRG.56351	.	0.000436319	-11.1623	9.96039e-13	1.03085e-10	down	yes
205952	i	chr18	.	42372491	42373002	MSTRG.99299.1	1	512	MSTRG.99299	LINC00907	0.000294374	-11.7301	9.96039e-13	1.03085e-10	down	yes
203936	i	chr18	.	24894806	24895083	MSTRG.97878.1	1	278	MSTRG.97878	AC018697	0.000158948	-12.6192	9.96039e-13	1.03085e-10	down	yes
93650	u	chr11	.	98751346	98751637	MSTRG.48498.1	1	292	MSTRG.48498	.	0.000166878	-12.5489	9.96039e-13	1.03085e-10	down	yes
300822	i	chr3	.	83991731	83992069	MSTRG.143643.1	1	339	MSTRG.143643	AC117464	0.00019489	-12.325	9.96039e-13	1.03085e-10	down	yes
407567	i	chr7	.	147316354	147316634	MSTRG.203997.1	1	281	MSTRG.203997	CNTNAP2	0.000160707	-12.6033	9.96039e-13	1.03085e-10	down	yes
379937	i	chr6	.	118243726	118244171	MSTRG.188996.1	1	446	MSTRG.188996	SLC35F1	0.00025553	-11.9342	9.96039e-13	1.03085e-10	down	yes
328407	i	chr4	.	92918708	92919298	MSTRG.158920.1	1	591	MSTRG.158920	GRID2	0.000338211	-11.5298	9.96039e-13	1.03085e-10	down	yes
298786	i	chr3	.	63438180	63438421	MSTRG.142387.1	1	242	MSTRG.142387	SYNPR	0.000138663	-12.8161	9.96039e-13	1.03085e-10	down	yes
349190	i	chr5	+	81711421	81730502	MSTRG.171892.3	2	18859	MSTRG.171892	SSBP2	81.3988	6.34693	1.02632e-12	1.06023e-10	up	yes
29848	j	chr1	+	46303708	46316776	MSTRG.16339.5	5	691	MSTRG.16339	UQCRH	0.000264874	-11.8824	1.02899e-12	1.0627e-10	down	yes
84617	u	chr11	.	56322779	56323728	MSTRG.44922.1	1	950	MSTRG.44922	.	0.000548655	-10.8318	1.20266e-12	1.23749e-10	down	yes
125024	i	chr13	+	40599780	40606271	MSTRG.63553.2	3	5616	MSTRG.63553	FOXO1	0.00341723	-8.19296	1.29512e-12	1.32843e-10	down	yes
93467	i	chr11	+	96212148	96245269	MSTRG.48350.8	2	33097	MSTRG.48350	MAML2	103.685	6.69606	2.1695e-12	2.20563e-10	up	yes
191693	i	chr17	+	44468675	44473427	MSTRG.93301.2	2	4478	MSTRG.93301	GPATCH8	852.649	9.73581	2.2424e-12	2.27796e-10	up	yes
287433	o	chr22	-	46055850	46056945	MSTRG.137319.4	2	1025	MSTRG.137319	AL121672	4066.13	11.9894	6.16403e-12	6.23101e-10	up	yes
274866	o	chr21	-	8212728	8258173	MSTRG.131493.8	3	1138	MSTRG.131493	FP671120	8.09076e-06	-16.9153	5.70424e-09	5.72918e-07	down	yes
85941	i	chr11	.	61741637	61741918	MSTRG.45426.1	1	282	MSTRG.45426	DAGLA	4941.06	12.2706	1.25625e-08	1.26077e-06	up	yes
101224	j	chr12	-	7124067	7130322	MSTRG.51947.5	4	2263	MSTRG.51947	RBP5	7728.16	12.9159	1.3777e-08	1.38231e-06	up	yes
97390	j	chr11	-	122085035	122203508	MSTRG.50434.28	6	33203	MSTRG.50434	MIR100HG	4220.7	12.0433	3.39852e-08	3.40638e-06	up	yes
436240	o	chr9	+	76779078	76838637	MSTRG.220266.18	2	20710	MSTRG.220266	PCA3	2.84184	1.50683	1.88461e-07	1.8827e-05	up	yes
106076	i	chr12	.	42516089	42516482	MSTRG.54655.1	1	394	MSTRG.54655	PRICKLE1	48.8896	5.61145	1.95581e-07	1.95283e-05	up	yes
154394	j	chr15	-	52494708	52569221	MSTRG.78927.1	5	4105	MSTRG.78927	ARPP19	0.00921016	-6.76256	2.71484e-07	2.70654e-05	down	yes
87681	j	chr11	+	65498682	65506516	MSTRG.45867.6	5	6458	MSTRG.45867	MALAT1	556.864	9.12118	8.03915e-07	7.96987e-05	up	yes
410414	i	chr8	.	8067697	8068537	MSTRG.205597.1	1	841	MSTRG.205597	AC105233	11.8456	3.56628	9.12764e-07	9.03981e-05	up	yes
442601	i	chr9	.	126998431	126999316	MSTRG.224050.1	1	886	MSTRG.224050	RALGPS1	0.0548439	-4.18852	9.60092e-07	9.50372e-05	down	yes
184348	i	chr17	.	13585873	13586146	MSTRG.90630.1	1	274	MSTRG.90630	HS3ST3A1	0.0518084	-4.27067	1.09475e-06	0.000108257	down	yes
68585	i	chr10	.	79965798	79966866	MSTRG.36837.1	1	1069	MSTRG.36837	SFTPD	0.0439549	-4.50783	1.23666e-06	0.000122197	down	yes
328786	i	chr4	.	97622379	97622630	MSTRG.159357.1	1	252	MSTRG.159357	STPG2	0.0244083	-5.35649	1.37063e-06	0.000135264	down	yes
138522	o	chr14	+	49819490	49863071	MSTRG.71626.17	2	549	MSTRG.71626	RNU6-539P	0.00691165	-7.17675	1.44169e-06	0.000142169	down	yes
187972	i	chr17	.	31117704	31118291	MSTRG.92060.1	1	588	MSTRG.92060	NF1	0.0515458	-4.278	1.50151e-06	0.000147994	down	yes
442602	i	chr9	.	127002625	127003292	MSTRG.224051.1	1	668	MSTRG.224051	RALGPS1	0.0584854	-4.09578	2.04596e-06	0.0002012	down	yes
421093	i	chr8	.	88429393	88429741	MSTRG.211514.1	1	349	MSTRG.211514	AC090578	0.000309205	-11.6592	2.63111e-06	0.000258224	down	yes
343074	i	chr5	.	31716530	31716946	MSTRG.168451.1	1	417	MSTRG.168451	PDZD2	69.1393	6.11143	3.10147e-06	0.000303929	up	yes
46731	i	chr1	.	166138592	166139352	MSTRG.24593.1	1	761	MSTRG.24593	FAM78B	0.429716	-1.21854	3.1494e-06	0.00030847	down	yes
59701	i	chr10	.	7923854	7924101	MSTRG.31819.1	1	248	MSTRG.31819	TAF3	0.175251	-2.51251	3.55946e-06	0.000347937	down	yes
314159	i	chr3	.	185123960	185124233	MSTRG.150870.1	1	274	MSTRG.150870	C3orf70	0.143495	-2.80092	4.92721e-06	0.000479238	down	yes
274840	o	chr21	+	8205315	8211510	MSTRG.131490.1	3	5991	MSTRG.131490	MIR3648-1	63.2767	5.9836	5.66411e-06	0.000549544	up	yes
348915	o	chr5	-	80147849	80223242	MSTRG.171726.1	2	3257	MSTRG.171726	SERINC5	4.08326	2.02972	6.33681e-06	0.000614049	up	yes
103842	i	chr12	.	22435586	22435952	MSTRG.53315.1	1	367	MSTRG.53315	ST8SIA1	0.000177652	-12.4587	6.49124e-06	0.000628546	down	yes
115298	i	chr12	.	93498812	93499587	MSTRG.58981.1	1	776	MSTRG.58981	MRPL42	0.083477	-3.58248	6.80723e-06	0.000658654	down	yes
18560	o	X	+	155980469	156030760	MSTRG.12153.1	2	427	MSTRG.12153	WASH6P	0.0238573	-5.38943	6.85316e-06	0.000662769	down	yes
441807	i	chr9	-	121297896	121299782	MSTRG.223645.1	2	1768	MSTRG.223645	GSN	6.15645	2.6221	6.8872e-06	0.000665897	up	yes
316197	u	chr3	-	196173978	196174585	MSTRG.151736.1	1	608	MSTRG.151736	.	0.0181054	-5.78744	7.04981e-06	0.00068145	down	yes
310716	i	chr3	.	159505829	159510584	MSTRG.149125.1	1	4756	MSTRG.149125	IQCJ-SCHIP1	0.0689049	-3.85925	8.12515e-06	0.000784426	down	yes
406525	i	chr7	.	140840453	140841007	MSTRG.203416.1	1	555	MSTRG.203416	BRAF	0.0617675	-4.01701	8.3036e-06	0.000800862	down	yes
438155	i	chr9	-	92960609	92961079	MSTRG.221401.1	2	376	MSTRG.221401	FGD3	40.9643	5.3563	8.86813e-06	0.000855098	up	yes
402250	i	chr7	.	107418017	107418621	MSTRG.201074.1	1	605	MSTRG.201074	COG5	0.06328	-3.98211	9.76696e-06	0.000940144	down	yes
344030	i	chr5	.	38670559	38670990	MSTRG.168951.1	1	432	MSTRG.168951	LIFR-AS1	0.0194829	-5.68165	9.82596e-06	0.00094559	down	yes
35473	i	chr1	.	87006418	87007132	MSTRG.19659.1	1	715	MSTRG.19659	AC093155	0.320383	-1.64213	1.39541e-05	0.00133497	down	yes
82329	i	chr11	.	35698513	35699251	MSTRG.43776.1	1	739	MSTRG.43776	TRIM44	0.084246	-3.56925	1.50679e-05	0.00143906	down	yes
71122	i	chr10	.	99043913	99044493	MSTRG.38321.1	1	581	MSTRG.38321	HPSE2	0.0231503	-5.43282	1.54457e-05	0.00147407	down	yes
339733	u	chr5	-	10001	11788	MSTRG.166236.1	1	1788	MSTRG.166236	.	0.0318318	-4.97339	1.57301e-05	0.00150047	down	yes
204543	i	chr18	.	31349043	31349291	MSTRG.98337.1	1	249	MSTRG.98337	DSG1	0.0474419	-4.39769	1.71121e-05	0.00162833	down	yes
232668	u	chr2	.	18963539	18963939	MSTRG.109713.1	1	401	MSTRG.109713	.	0.313219	-1.67476	1.73632e-05	0.00165142	down	yes
402251	i	chr7	.	107422698	107423284	MSTRG.201075.1	1	587	MSTRG.201075	COG5	0.065585	-3.93049	1.78785e-05	0.0016996	down	yes
95741	u	chr11	.	114497679	114498255	MSTRG.49773.1	1	577	MSTRG.49773	.	0.22152	-2.17449	2.11622e-05	0.00200493	down	yes
264664	i	chr20	.	1751643	1752690	MSTRG.126527.1	1	1048	MSTRG.126527	AL109809	0.302481	-1.72508	2.15731e-05	0.00204188	down	yes
87635	o	chr11	+	65422804	65455581	MSTRG.45863.10	2	32752	MSTRG.45863	AP000769	457.875	8.83881	2.19385e-05	0.00207546	up	yes
58404	u	chr10	.	10001	10429	MSTRG.31166.1	1	429	MSTRG.31166	.	0.0357542	-4.80574	2.20206e-05	0.00208222	down	yes
218240	i	chr19	.	19454019	19454589	MSTRG.104323.1	1	571	MSTRG.104323	GATAD2A	0.0604293	-4.04861	2.24659e-05	0.00212381	down	yes
259225	i	chr2	.	212457299	212457738	MSTRG.124020.1	1	440	MSTRG.124020	ERBB4	0.000250497	-11.9629	2.30695e-05	0.00217824	down	yes
184347	i	chr17	.	13585237	13585493	MSTRG.90629.1	1	257	MSTRG.90629	HS3ST3A1	0.127314	-2.97353	2.32055e-05	0.00219002	down	yes
134279	u	chr14	.	22672499	22675794	MSTRG.69314.1	1	3296	MSTRG.69314	.	0.0586514	-4.09169	2.48138e-05	0.00233898	down	yes
6105	i	X	.	49942668	49944028	MSTRG.4049.1	1	1361	MSTRG.4049	CLCN5	0.0750904	-3.73523	2.82052e-05	0.00264908	down	yes
49590	i	chr1	.	187344293	187344507	MSTRG.26262.1	1	215	MSTRG.26262	LINC01036	0.101427	-3.30148	3.00462e-05	0.00281928	down	yes
116914	i	chr12	+	104338410	104339138	MSTRG.59750.25	1	729	MSTRG.59750	TXNRD1	0.100079	-3.32079	3.01404e-05	0.00282744	down	yes
81035	i	chr11	.	27444243	27444600	MSTRG.43141.1	1	358	MSTRG.43141	LGR4	0.434939	-1.20112	3.0317e-05	0.00284333	down	yes
36955	i	chr1	.	97156530	97157044	MSTRG.20556.1	1	515	MSTRG.20556	DPYD	0.0790131	-3.66176	3.13615e-05	0.00293847	down	yes
380748	i	chr6	.	125786259	125787081	MSTRG.189604.1	1	823	MSTRG.189604	NCOA7	0.204831	-2.28749	3.27143e-05	0.00306081	down	yes
136337	o	chr14	+	31666311	31676325	MSTRG.70026.1	2	257	MSTRG.70026	NUBPL	0.0397106	-4.65433	3.27806e-05	0.00306628	down	yes
101225	j	chr12	-	7124067	7130373	MSTRG.51947.6	4	2672	MSTRG.51947	RBP5	5687.03	12.4735	3.40541e-05	0.00318312	up	yes
257409	i	chr2	.	200692481	200692811	MSTRG.123079.1	1	331	MSTRG.123079	AOX3P	0.00603022	-7.37357	3.49135e-05	0.00325955	down	yes
266854	i	chr20	.	18569626	18569884	MSTRG.127760.1	1	259	MSTRG.127760	AL121900	0.224328	-2.15632	3.54027e-05	0.00330444	down	yes
210644	u	chr18	+	80262890	80263265	MSTRG.101966.1	1	376	MSTRG.101966	.	0.0385472	-4.69723	3.69085e-05	0.00344006	down	yes
12425	i	X	.	105354120	105354348	MSTRG.8304.1	1	229	MSTRG.8304	IL1RAPL2	0.00271843	-8.52301	3.72532e-05	0.00347053	down	yes
410353	u	chr8	+	7612698	7613993	MSTRG.205555.1	3	893	MSTRG.205555	.	10.9916	3.45833	3.76985e-05	0.00350867	up	yes
137154	i	chr14	.	37442136	37442808	MSTRG.70621.1	1	673	MSTRG.70621	MIPOL1	0.334876	-1.5783	3.78958e-05	0.00352619	down	yes
261777	u	chr2	.	229730162	229730441	MSTRG.125281.1	1	280	MSTRG.125281	.	0.00429001	-7.8648	3.92724e-05	0.00364734	down	yes
122120	x	chr12	+	132762630	132770975	MSTRG.62025.1	2	319	MSTRG.62025	GOLGA3	0.0470711	-4.40902	3.95828e-05	0.00367529	down	yes
263417	i	chr2	+	239232497	239233027	MSTRG.126127.1	2	400	MSTRG.126127	HDAC4	0.0130501	-6.25979	3.99364e-05	0.00370725	down	yes
244133	i	chr2	.	98265615	98265840	MSTRG.115486.1	1	226	MSTRG.115486	VWA3B	0.0765194	-3.70803	4.00502e-05	0.00371693	down	yes
370967	x	chr6	+	42216030	42262615	MSTRG.183072.1	2	505	MSTRG.183072	TRERF1	0.0415751	-4.58814	4.13984e-05	0.0038384	down	yes
92011	i	chr11	.	85461743	85462569	MSTRG.47602.1	1	827	MSTRG.47602	DLG2	0.12986	-2.94497	4.16032e-05	0.00385465	down	yes
129477	i	chr13	.	79503532	79503795	MSTRG.66427.1	1	264	MSTRG.66427	NDFIP2	0.269483	-1.89173	4.17116e-05	0.00386378	down	yes
361108	i	chr5	.	171219709	171219915	MSTRG.178704.1	1	207	MSTRG.178704	RANBP17	0.0703532	-3.82924	4.22019e-05	0.00390735	down	yes
102135	u	chr12	.	10682767	10682972	MSTRG.52306.1	1	206	MSTRG.52306	.	0.131713	-2.92453	4.31198e-05	0.00398855	down	yes
145301	u	chr14	.	92508902	92509234	MSTRG.75042.1	1	333	MSTRG.75042	.	0.0955443	-3.38769	4.47236e-05	0.00413103	down	yes
46269	i	chr1	.	162729374	162729713	MSTRG.24298.1	1	340	MSTRG.24298	DDR2	0.140674	-2.82957	4.47886e-05	0.00413606	down	yes
5429	i	X	.	47654244	47654512	MSTRG.3782.1	1	269	MSTRG.3782	UXT	0.0914771	-3.45045	4.60582e-05	0.00424929	down	yes
409840	u	chr8	.	2856727	2857122	MSTRG.205201.1	1	396	MSTRG.205201	.	0.387914	-1.36619	4.78557e-05	0.00440681	down	yes
329814	u	chr4	.	105340081	105340394	MSTRG.159931.1	1	314	MSTRG.159931	.	0.0744355	-3.74787	4.80883e-05	0.00442718	down	yes
342597	u	chr5	.	26307750	26307960	MSTRG.168112.1	1	211	MSTRG.168112	.	0.0415805	-4.58795	4.85044e-05	0.00446444	down	yes
393922	i	chr7	.	49858195	49858512	MSTRG.196956.1	1	318	MSTRG.196956	VWC2	0.0627444	-3.99437	5.28579e-05	0.00484688	down	yes
111154	i	chr12	.	59764578	59766228	MSTRG.56284.1	1	1651	MSTRG.56284	SLC16A7	0.177967	-2.49032	5.33661e-05	0.00489119	down	yes
155129	i	chr15	.	58131093	58131460	MSTRG.79346.1	1	368	MSTRG.79346	ALDH1A2	0.116271	-3.10443	5.37895e-05	0.00492768	down	yes
192355	i	chr17	.	46771193	46771506	MSTRG.93498.1	1	314	MSTRG.93498	WNT3	0.202161	-2.30642	5.70866e-05	0.00521404	down	yes
386283	i	chr6	-	168611135	168614292	MSTRG.192731.8	3	2481	MSTRG.192731	SMOC2	82.3917	6.36443	5.73807e-05	0.00523826	up	yes
366074	i	chr6	.	21182567	21182785	MSTRG.181125.1	1	219	MSTRG.181125	CDKAL1	0.123755	-3.01445	5.75256e-05	0.00524904	down	yes
71112	i	chr10	.	98979706	98979960	MSTRG.38311.1	1	255	MSTRG.38311	HPSE2	0.000262228	-11.8969	5.76003e-05	0.0052534	down	yes
436903	i	chr9	.	83826540	83827197	MSTRG.220735.1	1	658	MSTRG.220735	GKAP1	0.0756463	-3.72459	5.97726e-05	0.00544517	down	yes
380594	i	chr6	.	124709288	124710983	MSTRG.189518.1	1	1696	MSTRG.189518	RNF217-AS1	0.0789747	-3.66247	6.09873e-05	0.00554807	down	yes
130603	i	chr13	.	93307986	93308797	MSTRG.67476.1	1	812	MSTRG.67476	GPC6	0.454024	-1.13916	6.22815e-05	0.00565922	down	yes
384104	i	chr6	-	150988878	150990547	MSTRG.191523.2	2	910	MSTRG.191523	MTHFD1L	0.00498954	-7.64688	6.23252e-05	0.00566187	down	yes
112053	i	chr12	.	66801550	66803326	MSTRG.56876.1	1	1777	MSTRG.56876	GRIP1	0.306546	-1.70583	6.27056e-05	0.00569247	down	yes
11545	u	X	.	100056242	100056514	MSTRG.7847.1	1	273	MSTRG.7847	.	0.0697664	-3.84132	6.29943e-05	0.00571602	down	yes
62649	i	chr10	.	30851829	30852503	MSTRG.33566.1	1	675	MSTRG.33566	ZNF438	0.128373	-2.96158	6.60753e-05	0.00598308	down	yes
24222	i	chr1	.	23127455	23128126	MSTRG.14084.1	1	672	MSTRG.14084	LUZP1	0.112099	-3.15716	6.62402e-05	0.00599524	down	yes
69552	i	chr10	.	88529475	88530118	MSTRG.37486.1	1	644	MSTRG.37486	RNLS	0.350644	-1.51192	6.65245e-05	0.00601819	down	yes
259227	i	chr2	.	212464158	212464376	MSTRG.124022.1	1	219	MSTRG.124022	ERBB4	0.058807	-4.08787	6.79139e-05	0.00613961	down	yes
398019	i	chr7	.	83621301	83621608	MSTRG.199084.1	1	308	MSTRG.199084	SEMA3E	0.42521	-1.23375	6.94192e-05	0.00627425	down	yes
206083	o	chr18	+	44251178	44314769	MSTRG.99398.1	2	2582	MSTRG.99398	AC110014	0.295864	-1.75699	6.97142e-05	0.006298	down	yes
390226	u	chr7	+	25085459	25094079	MSTRG.194924.1	2	267	MSTRG.194924	.	0.000128912	-12.9213	7.10438e-05	0.00641515	down	yes
154302	i	chr15	.	51976667	51977258	MSTRG.78896.1	1	592	MSTRG.78896	MAPK6	0.0965244	-3.37296	7.24703e-05	0.00653942	down	yes
115683	i	chr12	.	95764452	95764671	MSTRG.59165.1	1	220	MSTRG.59165	NTN4	0.220329	-2.18227	7.69926e-05	0.00692193	down	yes
392836	i	chr7	.	43343324	43343873	MSTRG.196381.1	1	550	MSTRG.196381	HECW1	0.0725802	-3.78428	7.72097e-05	0.00693826	down	yes
33633	i	chr1	.	72278903	72279393	MSTRG.18533.1	1	491	MSTRG.18533	NEGR1	0.101435	-3.30138	7.86224e-05	0.00705872	down	yes
322821	i	chr4	.	47496868	47497438	MSTRG.155608.1	1	571	MSTRG.155608	ATP10D	0.11581	-3.11017	7.95988e-05	0.00714474	down	yes
421843	i	chr8	.	93741737	93742017	MSTRG.211944.1	1	281	MSTRG.211944	AC010834	0.160403	-2.64023	7.96894e-05	0.00715123	down	yes
72030	i	chr10	.	103001726	103002096	MSTRG.38726.1	1	371	MSTRG.38726	CNNM2	7.80464	2.96433	7.98573e-05	0.00716465	up	yes
46268	i	chr1	.	162727543	162727951	MSTRG.24297.1	1	409	MSTRG.24297	DDR2	0.12889	-2.95579	8.2446e-05	0.00738335	down	yes
140765	u	chr14	.	63117042	63117394	MSTRG.72729.1	1	353	MSTRG.72729	.	0.138696	-2.85	9.18391e-05	0.00818889	down	yes
364239	i	chr6	.	5242132	5243071	MSTRG.180011.1	1	940	MSTRG.180011	LYRM4	0.105183	-3.24903	9.51147e-05	0.00846165	down	yes
131500	i	chr13	.	102083412	102084287	MSTRG.67949.1	1	876	MSTRG.67949	FGF14	0.410762	-1.28362	9.55735e-05	0.00850054	down	yes
15599	j	X	+	134491449	134500668	MSTRG.10558.4	5	902	MSTRG.10558	HPRT1	0.0629958	-3.9886	9.56172e-05	0.00850249	down	yes
187585	i	chr17	-	29733972	29752517	MSTRG.91912.1	2	16650	MSTRG.91912	SSH2	2.18441	1.12724	9.81797e-05	0.00872639	up	yes
236178	i	chr2	.	42271493	42271780	MSTRG.111478.1	1	288	MSTRG.111478	EML4	0.152114	-2.71678	9.89721e-05	0.00879481	down	yes
418578	i	chr8	.	67088114	67088914	MSTRG.209916.1	1	801	MSTRG.209916	CSPP1	0.167232	-2.58008	9.99358e-05	0.00887037	down	yes
33362	i	chr1	.	70915519	70915721	MSTRG.18150.1	1	203	MSTRG.18150	PTGER3	0.0942681	-3.40709	0.00010072	0.00893388	down	yes
298556	i	chr3	.	60242083	60242460	MSTRG.142245.1	1	378	MSTRG.142245	FHIT	0.23905	-2.06462	0.000104655	0.00925561	down	yes
375567	i	chr6	.	81870736	81871482	MSTRG.186127.1	1	747	MSTRG.186127	LINC02542	0.467248	-1.09774	0.000104821	0.00926825	down	yes
245765	j	chr2	+	110284658	110287782	MSTRG.116339.12	2	2210	MSTRG.116339	AC140479	0.00621415	-7.33023	0.000105832	0.00935121	down	yes
376848	u	chr6	.	90505249	90506171	MSTRG.186841.1	1	923	MSTRG.186841	.	0.31502	-1.66648	0.0001061	0.00937284	down	yes
18515	i	X	.	155672536	155673025	MSTRG.12119.1	1	490	MSTRG.12119	TMLHE	0.0955927	-3.38696	0.000106252	0.00938197	down	yes
63740	u	chr10	-	42078382	42078843	MSTRG.34227.1	1	462	MSTRG.34227	.	0.0106583	-6.55187	0.000108011	0.00951801	down	yes
177594	i	chr16	.	74979214	74979833	MSTRG.88131.1	1	620	MSTRG.88131	WDR59	0.0709995	-3.81605	0.000108707	0.009575	down	yes
72699	u	chr10	.	109795880	109797203	MSTRG.39172.1	1	1324	MSTRG.39172	.	0.0552217	-4.17862	0.000110348	0.00970641	down	yes
95779	u	chr11	.	114633550	114637428	MSTRG.49805.1	1	3879	MSTRG.49805	.	0.0927681	-3.43023	0.000110409	0.00970848	down	yes
190463	i	chr17	.	41837033	41837411	MSTRG.93009.1	1	379	MSTRG.93009	KLHL10	0.0676317	-3.88616	0.000111571	0.00980734	down	yes
201478	i	chr18	.	2670633	2671259	MSTRG.96670.1	1	627	MSTRG.96670	SMCHD1	0.109772	-3.18742	0.000114008	0.0100081	down	yes
436902	i	chr9	.	83820568	83821775	MSTRG.220734.1	1	1208	MSTRG.220734	GKAP1	0.0609501	-4.03623	0.000116091	0.0101795	down	yes
40810	u	chr1	-	143501552	143505065	MSTRG.22542.1	3	2603	MSTRG.22542	.	0.000145557	-12.7461	0.000116509	0.0102093	down	yes
291133	i	chr3	.	15862103	15862359	MSTRG.139027.1	1	257	MSTRG.139027	AC090945	0.169207	-2.56314	0.0001178	0.0103109	down	yes
51726	x	chr1	+	205106325	205117626	MSTRG.27495.1	2	236	MSTRG.27495	RBBP5	0.0920633	-3.44123	0.000120567	0.0105277	down	yes
320632	j	chr4	+	25925737	25929875	MSTRG.154098.5	3	873	MSTRG.154098	SMIM20	0.0280833	-5.15415	0.000121845	0.0106363	down	yes
112019	i	chr12	.	66585274	66585920	MSTRG.56843.1	1	647	MSTRG.56843	GRIP1	0.0717448	-3.80098	0.000121956	0.0106437	down	yes
272238	i	chr20	.	50938411	50938948	MSTRG.130166.1	1	538	MSTRG.130166	DPM1	0.0785559	-3.67014	0.0001228	0.0107101	down	yes
439228	i	chr9	.	99626548	99626828	MSTRG.222013.1	1	281	MSTRG.222013	AL359710	0.000422096	-11.2101	0.000126217	0.0109909	down	yes
13759	i	X	.	118098399	118098801	MSTRG.9219.1	1	403	MSTRG.9219	KLHL13	0.118689	-3.07474	0.000128952	0.0112049	down	yes
67464	i	chr10	.	73159633	73160334	MSTRG.36449.1	1	702	MSTRG.36449	ECD	0.100369	-3.31662	0.000131784	0.0114401	down	yes
300853	u	chr3	.	84421507	84421943	MSTRG.143669.1	1	437	MSTRG.143669	.	0.0415107	-4.59037	0.000135236	0.0117189	down	yes
774	i	X	.	5958113	5958443	MSTRG.490.1	1	331	MSTRG.490	NLGN4X	0.10127	-3.30373	0.00013562	0.0117496	down	yes
370228	i	chr6	.	37328022	37328283	MSTRG.182673.1	1	262	MSTRG.182673	TBC1D22B	0.0780265	-3.67989	0.000137597	0.0119129	down	yes
137414	j	chr14	-	39150186	39170532	MSTRG.70714.6	7	1194	MSTRG.70714	TRAPPC6B	0.442597	-1.17593	0.000139915	0.0121021	down	yes
327407	i	chr4	.	85598166	85598425	MSTRG.158992.1	1	260	MSTRG.158992	ARHGAP24	0.0208039	-5.587	0.000139937	0.0121021	down	yes
434449	u	chr9	.	41648076	41648763	MSTRG.219183.1	1	688	MSTRG.219183	.	0.108764	-3.20072	0.000140932	0.0121801	down	yes
52265	i	chr1	.	207373773	207374072	MSTRG.27748.1	1	300	MSTRG.27748	CD55	0.192626	-2.37613	0.000141492	0.0122258	down	yes
128151	i	chr13	.	66855731	66856058	MSTRG.65530.1	1	328	MSTRG.65530	PCDH9-AS2	0.0530882	-4.23547	0.00014157	0.0122298	down	yes
313264	i	chr3	.	181324323	181324589	MSTRG.150663.1	1	267	MSTRG.150663	SOX2-OT	0.164519	-2.60367	0.000142072	0.0122678	down	yes
418358	i	chr8	.	66024738	66025113	MSTRG.209712.1	1	376	MSTRG.209712	DNAJC5B	0.107887	-3.21241	0.000142123	0.0122694	down	yes
5674	u	X	.	48614127	48614786	MSTRG.3885.1	1	660	MSTRG.3885	.	0.153243	-2.70611	0.000143522	0.0123875	down	yes
124760	i	chr13	.	38345994	38346236	MSTRG.63432.1	1	243	MSTRG.63432	LINC00571	0.338937	-1.56091	0.000145465	0.0125469	down	yes
440430	u	chr9	.	110339534	110339787	MSTRG.222690.1	1	254	MSTRG.222690	.	0.0681991	-3.8741	0.000146297	0.0126103	down	yes
328803	i	chr4	.	97678815	97680602	MSTRG.159374.1	1	1788	MSTRG.159374	STPG2	0.116283	-3.10429	0.000146698	0.0126372	down	yes
188569	i	chr17	.	34953274	34954097	MSTRG.92359.1	1	824	MSTRG.92359	CCT6B	0.285394	-1.80897	0.000146771	0.01264	down	yes
431265	i	chr9	.	18020195	18020585	MSTRG.217231.1	1	391	MSTRG.217231	ADAMTSL1	0.0348721	-4.84178	0.000148001	0.0127404	down	yes
86673	u	chr11	.	63440821	63441034	MSTRG.45559.1	1	214	MSTRG.45559	.	0.0876517	-3.51207	0.000148342	0.0127669	down	yes
50834	i	chr1	.	201117161	201117710	MSTRG.27179.1	1	550	MSTRG.27179	ASCL5	0.125766	-2.99119	0.000150511	0.0129393	down	yes
130539	i	chr13	.	92742340	92743531	MSTRG.67401.1	1	1192	MSTRG.67401	GPC5	0.188171	-2.40989	0.000150949	0.0129713	down	yes
147663	i	chr14	.	103822128	103822799	MSTRG.76054.1	1	672	MSTRG.76054	PPP1R13B	0.218728	-2.19279	0.000151046	0.0129767	down	yes
385511	i	chr6	.	162902232	162902591	MSTRG.192267.1	1	360	MSTRG.192267	PACRG	0.0349873	-4.83702	0.000151604	0.013019	down	yes
259210	i	chr2	.	212375746	212376321	MSTRG.124005.1	1	576	MSTRG.124005	ERBB4	0.0341858	-4.87046	0.000152053	0.0130461	down	yes
207600	i	chr18	.	55775552	55775873	MSTRG.100273.1	1	322	MSTRG.100273	AC022031	0.0179571	-5.7993	0.0001523	0.0130615	down	yes
388734	i	chr7	.	12381596	12381858	MSTRG.194026.1	1	263	MSTRG.194026	VWDE	0.0017037	-9.19711	0.000154481	0.013237	down	yes
337621	i	chr4	.	173253055	173253366	MSTRG.165008.1	1	312	MSTRG.165008	GALNT7	12.853	3.68403	0.000154662	0.0132495	up	yes
29595	i	chr1	+	45519582	45520211	MSTRG.16246.1	1	630	MSTRG.16246	PRDX1	0.1633	-2.6144	0.000155047	0.0132797	down	yes
40770	u	chr1	.	143217203	143218518	MSTRG.22518.1	1	1316	MSTRG.22518	.	0.0737719	-3.76078	0.000155347	0.0132995	down	yes
236179	i	chr2	.	42272634	42272907	MSTRG.111479.1	1	274	MSTRG.111479	EML4	0.102879	-3.28098	0.000157796	0.0134973	down	yes
248984	i	chr2	.	134830795	134831274	MSTRG.118253.1	1	480	MSTRG.118253	CCNT2-AS1	0.177455	-2.49447	0.000158316	0.0135359	down	yes
414070	i	chr8	.	31667033	31667415	MSTRG.207294.1	1	383	MSTRG.207294	NRG1	0.0216674	-5.52833	0.000159374	0.0136204	down	yes
184349	i	chr17	.	13587177	13587443	MSTRG.90631.1	1	267	MSTRG.90631	HS3ST3A1	0.251192	-1.99314	0.000159894	0.0136589	down	yes
197452	u	chr17	.	73328272	73328546	MSTRG.95460.1	1	275	MSTRG.95460	.	0.0706135	-3.82391	0.000164428	0.0140247	down	yes
411315	o	chr8	+	13155335	13170702	MSTRG.206133.1	2	14999	MSTRG.206133	Y_RNA	2.35045	1.23294	0.000166024	0.0141473	up	yes
184052	u	chr17	.	10888593	10889498	MSTRG.90408.1	1	906	MSTRG.90408	.	0.0504455	-4.30913	0.000166276	0.0141607	down	yes
441489	u	chr9	.	118452433	118452653	MSTRG.223413.1	1	221	MSTRG.223413	.	0.0343088	-4.86528	0.000166567	0.0141824	down	yes
161559	u	chr15	.	91851163	91851374	MSTRG.81892.1	1	212	MSTRG.81892	.	0.114915	-3.12136	0.00016791	0.0142937	down	yes
388735	i	chr7	.	12394610	12395063	MSTRG.194027.1	1	454	MSTRG.194027	VWDE	0.0165222	-5.91945	0.000169241	0.0144038	down	yes
326386	u	chr4	.	77959625	77959860	MSTRG.157865.1	1	236	MSTRG.157865	.	0.094839	-3.39838	0.000169611	0.014429	down	yes
245063	i	chr2	.	104860982	104861662	MSTRG.115948.1	1	681	MSTRG.115948	AC018730	0.11112	-3.16981	0.000170513	0.0144994	down	yes
6871	u	X	.	54667158	54667691	MSTRG.4440.1	1	534	MSTRG.4440	.	0.106035	-3.23739	0.000171999	0.0146226	down	yes
155868	i	chr15	.	63257786	63258418	MSTRG.79660.1	1	633	MSTRG.79660	RAB8B	0.17272	-2.53349	0.000173202	0.0147153	down	yes
328795	i	chr4	.	97640587	97641114	MSTRG.159366.1	1	528	MSTRG.159366	STPG2	0.163101	-2.61616	0.000176364	0.0149677	down	yes
304288	i	chr3	.	116333770	116334325	MSTRG.145702.1	1	556	MSTRG.145702	LSAMP	0.0188284	-5.73095	0.000177877	0.0150871	down	yes
257963	i	chr2	.	202451412	202452169	MSTRG.123318.1	1	758	MSTRG.123318	BMPR2	0.145711	-2.77881	0.000177887	0.0150871	down	yes
216536	u	chr19	.	15336748	15337016	MSTRG.103907.1	1	269	MSTRG.103907	.	0.0941011	-3.40964	0.000178333	0.0151216	down	yes
310718	i	chr3	.	159543391	159544059	MSTRG.149127.1	1	669	MSTRG.149127	IQCJ-SCHIP1	0.0342459	-4.86793	0.000178738	0.0151461	down	yes
106372	u	chr12	.	45464329	45464549	MSTRG.54779.1	1	221	MSTRG.54779	.	0.00432781	-7.85215	0.000179455	0.0152002	down	yes
268312	u	chr20	+	31106682	31106999	MSTRG.128529.1	1	318	MSTRG.128529	.	0.00203874	-8.9381	0.000181224	0.0153435	down	yes
66440	i	chr10	.	67064266	67064502	MSTRG.35953.1	1	237	MSTRG.35953	CTNNA3	0.000271157	-11.8486	0.000181536	0.0153665	down	yes
374094	i	chr6	.	70800784	70801161	MSTRG.185043.1	1	378	MSTRG.185043	SMAP1	0.533334	-0.906888	0.000182391	0.0154356	down	no
60225	i	chr10	.	12134435	12134904	MSTRG.32168.1	1	470	MSTRG.32168	SEC61A2	0.248388	-2.00933	0.000183988	0.0155674	down	yes
329314	i	chr4	+	101198929	101204656	MSTRG.159664.1	2	5330	MSTRG.159664	PPP3CA	0.00781791	-6.999	0.000184535	0.0156069	down	yes
235260	u	chr2	.	36098559	36099024	MSTRG.110968.1	1	466	MSTRG.110968	.	0.0261619	-5.25639	0.000184836	0.015629	down	yes
386541	u	chr6	.	169817404	169820308	MSTRG.192816.1	1	2905	MSTRG.192816	.	0.409266	-1.28889	0.000186317	0.0157406	down	yes
404482	u	chr7	.	127492309	127492579	MSTRG.202382.1	1	271	MSTRG.202382	.	0.0400266	-4.6429	0.000186665	0.0157666	down	yes
30311	i	chr1	.	48821605	48821937	MSTRG.16615.1	1	333	MSTRG.16615	AGBL4	0.0161753	-5.95007	0.00019049	0.0160757	down	yes
40965	i	chr1	-	144824562	144828643	MSTRG.22616.7	3	2177	MSTRG.22616	FP700111	0.000236008	-12.0489	0.000192457	0.0162312	down	yes
137989	i	chr14	.	44896572	44896829	MSTRG.71204.1	1	258	MSTRG.71204	AL049870	0.196602	-2.34665	0.000193668	0.0163263	down	yes
111155	i	chr12	.	59766541	59767151	MSTRG.56285.1	1	611	MSTRG.56285	SLC16A7	0.153531	-2.7034	0.000198743	0.0167181	down	yes
74061	u	chr10	.	119987464	119987727	MSTRG.39890.1	1	264	MSTRG.39890	.	0.0246877	-5.34006	0.000201815	0.0169547	down	yes
66482	i	chr10	.	67443040	67443882	MSTRG.35994.1	1	843	MSTRG.35994	CTNNA3	0.16412	-2.60718	0.0002041	0.0171318	down	yes
347625	i	chr5	.	71495949	71496237	MSTRG.171026.1	1	289	MSTRG.171026	BDP1	0.12278	-3.02585	0.000208724	0.0174896	down	yes
390902	i	chr7	.	29699422	29700235	MSTRG.195237.1	1	814	MSTRG.195237	DPY19L2P3	0.0996476	-3.32702	0.000208754	0.0174896	down	yes
348256	i	chr5	.	75657228	75657873	MSTRG.171449.1	1	646	MSTRG.171449	ANKDD1B	0.0408993	-4.61178	0.000211024	0.0176599	down	yes
106083	i	chr12	.	42532933	42549117	MSTRG.54661.1	1	16185	MSTRG.54661	PRICKLE1	4.09183	2.03275	0.00021155	0.0176964	up	yes
232611	u	chr2	.	18694258	18694982	MSTRG.109643.1	1	725	MSTRG.109643	.	0.346449	-1.52929	0.000212521	0.0177739	down	yes
399964	i	chr7	.	98108559	98108842	MSTRG.200121.1	1	284	MSTRG.200121	LMTK2	0.0908	-3.46116	0.000213933	0.0178766	down	yes
310714	i	chr3	.	159491287	159491500	MSTRG.149123.1	1	214	MSTRG.149123	IQCJ-SCHIP1	0.0398859	-4.64798	0.000214415	0.0179016	down	yes
438585	i	chr9	.	95777592	95777899	MSTRG.221604.1	1	308	MSTRG.221604	LINC00476	13.9718	3.80445	0.00021563	0.0179992	up	yes
440202	u	chr9	.	108598975	108599261	MSTRG.222630.1	1	287	MSTRG.222630	.	0.0242263	-5.36728	0.000217195	0.0181221	down	yes
229202	o	chr19	+	56367089	56379828	MSTRG.108048.1	2	620	MSTRG.108048	ZNF542P	0.00969648	-6.68832	0.000222353	0.0185247	down	yes
255504	i	chr2	.	185775081	185775519	MSTRG.121972.1	1	439	MSTRG.121972	FSIP2	0.159133	-2.6517	0.000228911	0.0190225	down	yes
327391	i	chr4	.	85480199	85480491	MSTRG.158977.1	1	293	MSTRG.158977	ARHGAP24	0.107309	-3.22016	0.000232064	0.0192477	down	yes
7444	u	X	.	57602123	57602359	MSTRG.4774.1	1	237	MSTRG.4774	.	0.0648794	-3.9461	0.000235114	0.0194841	down	yes
295513	u	chr3	.	47514135	47514774	MSTRG.141206.1	1	640	MSTRG.141206	.	0.124569	-3.00499	0.000235538	0.0195151	down	yes
111267	u	chr12	.	61415309	61415703	MSTRG.56393.1	1	395	MSTRG.56393	.	0.0608159	-4.03941	0.000238851	0.0197687	down	yes
310426	i	chr3	.	157251502	157251760	MSTRG.149011.1	1	259	MSTRG.149011	AC092944	0.0676893	-3.88493	0.000238987	0.0197757	down	yes
414194	i	chr8	.	32236701	32236950	MSTRG.207411.1	1	250	MSTRG.207411	NRG1	0.000303909	-11.6841	0.000240285	0.0198705	down	yes
351270	i	chr5	.	97163585	97164303	MSTRG.173061.1	1	719	MSTRG.173061	RIOK2	0.367108	-1.44572	0.0002405	0.0198841	down	yes
130479	i	chr13	.	92532600	92533848	MSTRG.67342.1	1	1249	MSTRG.67342	GPC5	0.234999	-2.08928	0.000242774	0.0200509	down	yes
246906	u	chr2	.	117751466	117751681	MSTRG.116908.1	1	216	MSTRG.116908	.	0.124949	-3.00058	0.000245894	0.0202957	down	yes
197036	u	chr17	.	70847915	70848155	MSTRG.95298.1	1	241	MSTRG.95298	.	0.196241	-2.3493	0.000247554	0.0204198	down	yes
288815	i	chr3	.	3759176	3759397	MSTRG.137938.1	1	222	MSTRG.137938	SUMF1	0.136178	-2.87643	0.000250126	0.0206102	down	yes
299031	u	chr3	.	65331802	65332074	MSTRG.142456.1	1	273	MSTRG.142456	.	0.00363531	-8.10371	0.000251465	0.0207074	down	yes
442337	i	chr9	.	125170281	125170528	MSTRG.223900.1	1	248	MSTRG.223900	PPP6C	0.185261	-2.43237	0.000251904	0.0207349	down	yes
19524	o	chr1	-	10001	180998	MSTRG.12314.1	5	379	MSTRG.12314	WASH7P	0.000576293	-10.7609	0.00025304	0.0208108	down	yes
379130	i	chr6	.	111247210	111247765	MSTRG.188547.1	1	556	MSTRG.188547	AL360227	0.141304	-2.82312	0.000255625	0.0210014	down	yes
115834	u	chr12	.	96885395	96885713	MSTRG.59233.1	1	319	MSTRG.59233	.	0.0320219	-4.9648	0.000256354	0.0210479	down	yes
19029	u	Y	.	17377117	17377417	MSTRG.12241.1	1	301	MSTRG.12241	.	0.11158	-3.16385	0.000258001	0.0211787	down	yes
80635	u	chr11	.	23110080	23110373	MSTRG.42804.1	1	294	MSTRG.42804	.	0.0447951	-4.48052	0.000259832	0.0213111	down	yes
249799	i	chr2	.	142106354	142106663	MSTRG.118838.1	1	310	MSTRG.118838	LRP1B	0.00032162	-11.6024	0.000264528	0.0216827	down	yes
374319	i	chr6	.	72342051	72342285	MSTRG.185187.1	1	235	MSTRG.185187	RIMS1	0.0111656	-6.48479	0.000265057	0.0217189	down	yes
337579	i	chr4	.	173115483	173115762	MSTRG.164974.1	1	280	MSTRG.164974	AC105285	0.0684051	-3.86975	0.000265082	0.0217189	down	yes
359645	i	chr5	.	157567519	157567773	MSTRG.177735.1	1	255	MSTRG.177735	ADAM19	0.0238756	-5.38832	0.000268545	0.0219888	down	yes
66283	i	chr10	.	65630518	65631374	MSTRG.35801.1	1	857	MSTRG.35801	LINC01515	0.31414	-1.67052	0.000272557	0.0222894	down	yes
7963	u	X	.	65157926	65160429	MSTRG.5270.1	1	2504	MSTRG.5270	.	0.176152	-2.50511	0.000274484	0.0224422	down	yes
184465	u	chr17	.	14299057	14299317	MSTRG.90658.1	1	261	MSTRG.90658	.	0.0192541	-5.69869	0.000275974	0.0225546	down	yes
344318	i	chr5	.	40857195	40857420	MSTRG.169070.1	1	226	MSTRG.169070	CARD6	0.0241974	-5.36901	0.000276416	0.0225813	down	yes
389461	u	chr7	.	19189205	19192180	MSTRG.194490.1	1	2976	MSTRG.194490	.	0.175788	-2.50809	0.000277318	0.0226455	down	yes
36956	i	chr1	.	97161817	97162312	MSTRG.20557.1	1	496	MSTRG.20557	DPYD	0.129155	-2.95283	0.000277667	0.0226693	down	yes
349534	i	chr5	.	84223786	84224010	MSTRG.172189.1	1	225	MSTRG.172189	EDIL3	0.332443	-1.58882	0.000280692	0.0229019	down	yes
92013	i	chr11	.	85465552	85466281	MSTRG.47604.1	1	730	MSTRG.47604	DLG2	0.0910417	-3.45733	0.000281823	0.0229798	down	yes
75287	i	chr10	.	130269077	130269591	MSTRG.40572.1	1	515	MSTRG.40572	LINC02646	0.0380395	-4.71636	0.000282325	0.0230111	down	yes
180784	j	chr16	+	90111384	90126524	MSTRG.89498.10	2	207	MSTRG.89498	FAM157C	0.287127	-1.80024	0.000283349	0.023085	down	yes
271521	i	chr20	.	46441055	46441307	MSTRG.129791.1	1	253	MSTRG.129791	ZNF663P	0.146007	-2.77589	0.000285192	0.0232254	down	yes
232667	u	chr2	.	18958512	18959292	MSTRG.109712.1	1	781	MSTRG.109712	.	0.357841	-1.48261	0.000289308	0.0235263	down	yes
422194	i	chr8	.	95704358	95705181	MSTRG.212111.1	1	824	MSTRG.212111	C8orf37-AS1	0.0833456	-3.58475	0.00028984	0.0235647	down	yes
33505	i	chr1	.	71533125	71534350	MSTRG.18407.1	1	1226	MSTRG.18407	NEGR1	0.311908	-1.68081	0.000292251	0.0237311	down	yes
7868	i	X	.	64300849	64301624	MSTRG.5231.1	1	776	MSTRG.5231	MTMR8	0.103254	-3.27574	0.00029355	0.0238217	down	yes
323500	i	chr4	.	53185597	53185867	MSTRG.156033.1	1	271	MSTRG.156033	SCFD2	0.0893842	-3.48384	0.000295274	0.0239319	down	yes
13749	i	X	.	118070966	118071519	MSTRG.9209.1	1	554	MSTRG.9209	KLHL13	0.105826	-3.24024	0.000295701	0.0239614	down	yes
310879	u	chr3	.	160489078	160489470	MSTRG.149150.1	1	393	MSTRG.149150	.	0.431935	-1.21111	0.000296326	0.0239972	down	yes
306817	i	chr3	.	131045249	131045714	MSTRG.147072.1	1	466	MSTRG.147072	NEK11	0.401301	-1.31724	0.000298429	0.0241575	down	yes
201772	i	chr18	.	4450822	4451329	MSTRG.96852.1	1	508	MSTRG.96852	DLGAP1	0.0532052	-4.23229	0.000300458	0.0243116	down	yes
257962	i	chr2	.	202448163	202448754	MSTRG.123317.1	1	592	MSTRG.123317	BMPR2	0.129914	-2.94437	0.000303349	0.0245304	down	yes
13706	u	X	.	117877717	117877990	MSTRG.9150.1	1	274	MSTRG.9150	.	0.0667491	-3.90511	0.000309289	0.02499	down	yes
297686	i	chr3	-	53231032	53231261	MSTRG.141717.1	1	230	MSTRG.141717	TKT	0.560152	-0.83611	0.00030944	0.024997	down	no
41531	i	chr1	.	147322064	147322470	MSTRG.22819.1	1	407	MSTRG.22819	LINC00624	0.0982395	-3.34755	0.000311006	0.0251028	down	yes
354640	i	chr5	.	128820940	128821195	MSTRG.175372.1	1	256	MSTRG.175372	SLC27A6	0.0760891	-3.71617	0.000311584	0.025139	down	yes
147648	i	chr14	.	103754762	103755113	MSTRG.76044.1	1	352	MSTRG.76044	PPP1R13B	0.257127	-1.95944	0.000311772	0.025149	down	yes
197331	i	chr17	.	72448078	72448417	MSTRG.95453.1	1	340	MSTRG.95453	LINC00511	0.0720383	-3.79509	0.000314652	0.0253411	down	yes
88535	u	chr11	-	67082210	67083321	MSTRG.46055.1	2	979	MSTRG.46055	.	0.418547	-1.25654	0.000314672	0.0253411	down	yes
274905	o	chr21	-	8396566	8441151	MSTRG.131506.2	3	616	MSTRG.131506	FP236383	0.190034	-2.39567	0.000314836	0.0253491	down	yes
120396	i	chr12	.	123125565	123126162	MSTRG.61203.1	1	598	MSTRG.61203	PITPNM2	0.0716929	-3.80203	0.000315102	0.0253654	down	yes
409843	u	chr8	.	2864082	2866459	MSTRG.205204.1	1	2378	MSTRG.205204	.	0.390502	-1.3566	0.000321767	0.0258327	down	yes
371626	i	chr6	.	44893407	44894701	MSTRG.183353.1	1	1295	MSTRG.183353	SUPT3H	0.169618	-2.55964	0.000324637	0.0260364	down	yes
323184	u	chr4	-	49634952	49640786	MSTRG.155797.1	2	454	MSTRG.155797	.	0.0010938	-9.83643	0.00032574	0.0261141	down	yes
377499	u	chr6	.	98421686	98421933	MSTRG.187378.1	1	248	MSTRG.187378	.	0.0369894	-4.75674	0.000327991	0.0262731	down	yes
107883	i	chr12	.	50430694	50431283	MSTRG.55331.1	1	590	MSTRG.55331	LARP4	0.134911	-2.88992	0.000328221	0.0262807	down	yes
379392	u	chr6	.	112533387	112533616	MSTRG.188582.1	1	230	MSTRG.188582	.	0.0531596	-4.23352	0.000328486	0.0262911	down	yes
231578	u	chr2	.	9572496	9572713	MSTRG.109031.1	1	218	MSTRG.109031	.	0.128949	-2.95513	0.000332554	0.0265949	down	yes
374956	i	chr6	.	77082703	77084128	MSTRG.185596.1	1	1426	MSTRG.185596	AL355612	0.142153	-2.81448	0.000333945	0.0266953	down	yes
351581	u	chr5	.	100283208	100283966	MSTRG.173353.1	1	759	MSTRG.173353	.	0.105275	-3.24777	0.000335163	0.0267762	down	yes
382972	i	chr6	.	142551126	142551385	MSTRG.190858.1	1	260	MSTRG.190858	AL359313	0.019445	-5.68446	0.000335253	0.0267779	down	yes
157716	i	chr15	.	73510815	73512783	MSTRG.80400.1	1	1969	MSTRG.80400	REC114	0.184711	-2.43666	0.000335627	0.0268023	down	yes
336868	i	chr4	.	165180794	165181101	MSTRG.164452.1	1	308	MSTRG.164452	TMEM192	0.0179643	-5.79873	0.000336875	0.0268855	down	yes
125374	i	chr13	.	43834802	43835229	MSTRG.63761.1	1	428	MSTRG.63761	CCDC122	0.179894	-2.47478	0.000337965	0.026956	down	yes
88531	u	chr11	.	67076746	67077041	MSTRG.46031.1	1	296	MSTRG.46031	.	0.095105	-3.39433	0.000339593	0.0270692	down	yes
141553	i	chr14	.	68114879	68115348	MSTRG.73129.1	1	470	MSTRG.73129	RAD51B	0.143735	-2.79852	0.000340163	0.0271036	down	yes
5258	u	X	.	47095763	47096466	MSTRG.3696.1	1	704	MSTRG.3696	.	0.396333	-1.33521	0.000340627	0.027135	down	yes
185857	u	chr17	+	19185957	19187029	MSTRG.91190.1	2	581	MSTRG.91190	.	0.201524	-2.31097	0.0003417	0.0272095	down	yes
316411	i	chr3	-	196869213	196870545	MSTRG.151876.2	1	1333	MSTRG.151876	SENP5	0.151419	-2.72338	0.000343215	0.0273023	down	yes
216028	o	chr19	-	13823461	13843031	MSTRG.103688.1	3	13481	MSTRG.103688	AC020916	0.0480724	-4.37865	0.000344535	0.027385	down	yes
224515	i	chr19	.	44898552	44899133	MSTRG.106724.1	1	582	MSTRG.106724	TOMM40	0.141115	-2.82505	0.000345179	0.0274194	down	yes
328779	i	chr4	.	97588589	97588834	MSTRG.159350.1	1	246	MSTRG.159350	STPG2	0.0961436	-3.37867	0.000346138	0.02749	down	yes
71110	i	chr10	.	98960951	98962424	MSTRG.38309.1	1	1474	MSTRG.38309	HPSE2	0.188769	-2.40531	0.000346778	0.0275319	down	yes
126123	i	chr13	.	47919416	47920169	MSTRG.64144.1	1	754	MSTRG.64144	SUCLA2	0.290231	-1.78473	0.000351789	0.0278822	down	yes
186688	u	chr17	.	26722277	26722515	MSTRG.91544.1	1	239	MSTRG.91544	.	0.156288	-2.67772	0.000352426	0.0279213	down	yes
388898	u	chr7	.	13991722	13992118	MSTRG.194124.1	1	397	MSTRG.194124	.	0.151857	-2.71921	0.000355289	0.0281083	down	yes
128154	i	chr13	.	66875410	66876325	MSTRG.65533.1	1	916	MSTRG.65533	PCDH9-AS2	0.345099	-1.53492	0.0003569	0.0282243	down	yes
137509	i	chr14	.	39472599	39473403	MSTRG.70957.1	1	805	MSTRG.70957	AL049828	0.178549	-2.48561	0.000359109	0.0283704	down	yes
7177	u	X	.	56375271	56376028	MSTRG.4660.1	1	758	MSTRG.4660	.	0.106422	-3.23214	0.000359475	0.0283932	down	yes
440778	i	chr9	.	112579654	112579870	MSTRG.222972.1	1	217	MSTRG.222972	KIAA1958	0.028456	-5.13513	0.000359894	0.0284099	down	yes
328735	i	chr4	.	97334053	97334290	MSTRG.159310.1	1	238	MSTRG.159310	STPG2	0.0156237	-6.00012	0.000359901	0.0284099	down	yes
67592	u	chr10	+	73629205	73630459	MSTRG.36481.1	1	1255	MSTRG.36481	.	0.423348	-1.24008	0.000363683	0.0286969	down	yes
171719	u	chr16	.	34591990	34593676	MSTRG.85630.1	1	1687	MSTRG.85630	.	0.0650377	-3.94258	0.000365012	0.0287902	down	yes
75408	i	chr10	-	131916970	131920375	MSTRG.40681.1	3	422	MSTRG.40681	PPP2R2D	0.120446	-3.05355	0.000366094	0.0288696	down	yes
364801	i	chr6	.	9078332	9078748	MSTRG.180393.1	1	417	MSTRG.180393	HULC	0.0052948	-7.56121	0.00036678	0.0289063	down	yes
91642	i	chr11	-	83183122	83184118	MSTRG.47273.1	2	861	MSTRG.47273	PCF11	0.147015	-2.76597	0.000367359	0.0289228	down	yes
252891	u	chr2	.	167631871	167632409	MSTRG.120585.1	1	539	MSTRG.120585	.	0.121037	-3.04648	0.000367657	0.0289404	down	yes
302384	u	chr3	.	102000438	102000674	MSTRG.144671.1	1	237	MSTRG.144671	.	0.0508943	-4.29635	0.0003687	0.0290108	down	yes
420632	u	chr8	.	85043157	85043752	MSTRG.211141.1	1	596	MSTRG.211141	.	0.126333	-2.9847	0.000369643	0.0290792	down	yes
415326	i	chr8	.	40649179	40649721	MSTRG.208015.1	1	543	MSTRG.208015	ZMAT4	0.0839514	-3.5743	0.000371708	0.029224	down	yes
272298	x	chr20	+	51542755	51562578	MSTRG.130181.1	2	19801	MSTRG.130181	NFATC2	3.58657	1.84261	0.000371919	0.0292347	up	yes
363808	u	chr6	.	2944656	2944919	MSTRG.179826.1	1	264	MSTRG.179826	.	0.0416075	-4.58701	0.000372539	0.0292657	down	yes
268303	u	chr20	-	31060250	31070582	MSTRG.128537.3	2	1060	MSTRG.128537	.	0.00158868	-9.29796	0.000372769	0.0292779	down	yes
151904	i	chr15	.	40719072	40719811	MSTRG.77916.1	1	740	MSTRG.77916	RAD51	0.127439	-2.97213	0.000377345	0.0296195	down	yes
407369	i	chr7	.	144807452	144808122	MSTRG.203824.1	1	671	MSTRG.203824	TPK1	0.249851	-2.00086	0.000380431	0.0298378	down	yes
125458	u	chr13	.	44078917	44079148	MSTRG.63752.1	1	232	MSTRG.63752	.	0.00435393	-7.84347	0.000381555	0.0299199	down	yes
61225	o	chr10	+	19801211	19884312	MSTRG.32748.2	2	32073	MSTRG.32748	PLXDC2	718.524	9.48889	0.000383113	0.030024	up	yes
336854	i	chr4	.	165086491	165086717	MSTRG.164438.1	1	227	MSTRG.164438	TMEM192	0.151818	-2.71959	0.000386106	0.0302343	down	yes
216945	i	chr19	.	16311645	16312212	MSTRG.103959.1	1	568	MSTRG.103959	AC020911	0.054775	-4.19034	0.000389483	0.0304743	down	yes
271761	u	chr20	.	48071636	48071888	MSTRG.129897.1	1	253	MSTRG.129897	.	0.097386	-3.36014	0.000390067	0.0305078	down	yes
411317	x	chr8	-	13164348	13178569	MSTRG.206134.1	2	6380	MSTRG.206134	AC106845	5.83098	2.54374	0.000390516	0.0305368	up	yes
14283	u	X	.	121696130	121696621	MSTRG.9669.1	1	492	MSTRG.9669	.	0.0971347	-3.36387	0.000392332	0.0306666	down	yes
97622	o	chr11	+	123171472	123194905	MSTRG.50474.1	2	23234	MSTRG.50474	AP001970	2.48134	1.31112	0.000393108	0.0307211	up	yes
147664	i	chr14	.	103824039	103824711	MSTRG.76055.1	1	673	MSTRG.76055	PPP1R13B	0.0926895	-3.43145	0.000393717	0.0307564	down	yes
129586	u	chr13	.	80349197	80350023	MSTRG.66545.1	1	827	MSTRG.66545	.	0.178455	-2.48637	0.000397438	0.0309943	down	yes
81185	i	chr11	.	28046242	28046465	MSTRG.43279.1	1	224	MSTRG.43279	KIF18A	0.123763	-3.01435	0.000397477	0.0309943	down	yes
313058	u	chr3	.	180270770	180271336	MSTRG.150525.1	1	567	MSTRG.150525	.	0.114632	-3.12491	0.000397934	0.0310176	down	yes
359780	i	chr5	+	158992999	159029953	MSTRG.177809.5	2	36837	MSTRG.177809	EBF1	466.691	8.86632	0.000400066	0.0311589	up	yes
430854	u	chr9	.	14000242	14000468	MSTRG.216918.1	1	227	MSTRG.216918	.	0.066428	-3.91207	0.000401011	0.0312201	down	yes
319217	u	chr4	.	13224198	13224399	MSTRG.153169.1	1	202	MSTRG.153169	.	0.22713	-2.13841	0.000402227	0.031298	down	yes
167708	i	chr16	+	17339624	17346105	MSTRG.84122.1	2	5763	MSTRG.84122	XYLT1	2.38747	1.25548	0.000404118	0.0314244	up	yes
52055	i	chr1	+	206486148	206487065	MSTRG.27638.2	1	918	MSTRG.27638	IKBKE	0.280089	-1.83604	0.000406126	0.0315555	down	yes
130468	i	chr13	.	92485157	92485982	MSTRG.67331.1	1	826	MSTRG.67331	GPC5	0.335934	-1.57375	0.0004065	0.0315663	down	yes
188265	x	chr17	-	32467291	32473580	MSTRG.92131.1	2	998	MSTRG.92131	PSMD11	0.170354	-2.5534	0.000407987	0.0316623	down	yes
200118	i	chr17	.	81611384	81611956	MSTRG.96266.1	1	573	MSTRG.96266	NPLOC4	0.13094	-2.93302	0.000408981	0.0317331	down	yes
420125	i	chr8	+	80166040	80166893	MSTRG.210876.2	1	854	MSTRG.210876	TPD52	0.162582	-2.62076	0.000412072	0.0319476	down	yes
25366	u	chr1	.	27512675	27513323	MSTRG.14531.1	1	649	MSTRG.14531	.	0.143746	-2.7984	0.000412831	0.0319937	down	yes
9592	u	X	.	75738407	75738663	MSTRG.6033.1	1	257	MSTRG.6033	.	0.0859659	-3.54009	0.000414252	0.0320975	down	yes
380593	i	chr6	.	124707213	124708770	MSTRG.189517.1	1	1558	MSTRG.189517	RNF217-AS1	0.146259	-2.7734	0.000415981	0.0322187	down	yes
40777	u	chr1	-	143234416	143236644	MSTRG.22525.1	2	965	MSTRG.22525	.	0.0642299	-3.96061	0.000417428	0.0323244	down	yes
184432	i	chr17	.	14082252	14082825	MSTRG.90719.1	1	574	MSTRG.90719	COX10	0.341983	-1.548	0.000421798	0.0326305	down	yes
380103	u	chr6	.	119476230	119476476	MSTRG.189020.1	1	247	MSTRG.189020	.	0.171731	-2.54178	0.000424461	0.0328105	down	yes
40779	u	chr1	.	143239418	143240600	MSTRG.22527.1	1	1183	MSTRG.22527	.	0.0901794	-3.47106	0.000429304	0.0331652	down	yes
323034	i	chr4	.	48889370	48889981	MSTRG.155685.1	1	612	MSTRG.155685	OCIAD2	0.110494	-3.17796	0.000438238	0.0338219	down	yes
268395	x	chr20	-	31523304	31544935	MSTRG.128603.1	2	1609	MSTRG.128603	HM13	0.0594158	-4.07301	0.000438547	0.0338391	down	yes
131499	i	chr13	.	102065668	102065948	MSTRG.67948.1	1	281	MSTRG.67948	FGF14	0.134244	-2.89707	0.000439235	0.0338855	down	yes
383108	u	chr6	+	143513048	143515527	MSTRG.190928.1	2	442	MSTRG.190928	.	0.207131	-2.27138	0.000439373	0.0338894	down	yes
21234	i	chr1	.	6373245	6373864	MSTRG.12792.1	1	620	MSTRG.12792	ACOT7	0.0797384	-3.64858	0.000439635	0.0339029	down	yes
178949	u	chr16	.	83897557	83898252	MSTRG.88903.1	1	696	MSTRG.88903	.	0.0211393	-5.56393	0.000440385	0.0339474	down	yes
232848	u	chr2	.	20226700	20227002	MSTRG.109842.1	1	303	MSTRG.109842	.	0.0284279	-5.13655	0.000441014	0.0339892	down	yes
388829	i	chr7	.	13202942	13203190	MSTRG.194089.1	1	249	MSTRG.194089	AC011287	0.0432258	-4.53196	0.000445803	0.0343312	down	yes
92202	u	chr11	.	86206711	86206980	MSTRG.47350.1	1	270	MSTRG.47350	.	0.0369352	-4.75886	0.000446983	0.0344017	down	yes
30114	i	chr1	-	47358943	47359742	MSTRG.16440.1	2	377	MSTRG.16440	CMPK1	0.271586	-1.88052	0.000451189	0.0346891	down	yes
331527	u	chr4	.	118844261	118844557	MSTRG.160999.1	1	297	MSTRG.160999	.	0.0310894	-5.00743	0.000453079	0.0348161	down	yes
249460	u	chr2	.	138251021	138251383	MSTRG.118560.1	1	363	MSTRG.118560	.	0.0734256	-3.76757	0.000456843	0.0350683	down	yes
74208	u	chr10	.	121289689	121289956	MSTRG.40016.1	1	268	MSTRG.40016	.	0.233769	-2.09685	0.000457551	0.0351046	down	yes
247500	i	chr2	.	122265476	122265782	MSTRG.117230.1	1	307	MSTRG.117230	AC011246	0.101736	-3.2971	0.00046101	0.035363	down	yes
315410	u	chr3	-	193828832	193837426	MSTRG.151500.1	2	4996	MSTRG.151500	.	0.44623	-1.16414	0.000462522	0.0354522	down	yes
336365	i	chr4	.	158939011	158939420	MSTRG.164050.1	1	410	MSTRG.164050	C4orf45	0.0420495	-4.57177	0.000463365	0.0355088	down	yes
321481	i	chr4	.	36216547	36216765	MSTRG.154809.1	1	219	MSTRG.154809	ARAP2	0.0128223	-6.2852	0.000468611	0.0358476	down	yes
40762	u	chr1	+	143192673	143203914	MSTRG.22513.1	2	1964	MSTRG.22513	.	0.109017	-3.19738	0.000472746	0.0361426	down	yes
366538	i	chr6	.	24670920	24671382	MSTRG.181397.1	1	463	MSTRG.181397	ACOT13	0.197882	-2.33729	0.000472841	0.0361429	down	yes
311926	j	chr3	+	170258877	170270561	MSTRG.149815.2	5	418	MSTRG.149815	PRKCI	0.0614202	-4.02514	0.000474635	0.0362587	down	yes
38603	i	chr1	.	109840835	109841221	MSTRG.21457.1	1	387	MSTRG.21457	LINC01768	0.157851	-2.66336	0.0004759	0.0363482	down	yes
370981	u	chr6	.	42543024	42543299	MSTRG.183081.1	1	276	MSTRG.183081	.	0.0473908	-4.39925	0.000477153	0.0364297	down	yes
422106	i	chr8	.	95053243	95053474	MSTRG.212161.1	1	232	MSTRG.212161	NDUFAF6	0.14674	-2.76866	0.000480295	0.036641	down	yes
431289	i	chr9	.	18352300	18352560	MSTRG.217255.1	1	261	MSTRG.217255	ADAMTSL1	0.0268249	-5.22028	0.000485863	0.0370368	down	yes
246891	u	chr2	.	117528084	117528299	MSTRG.116893.1	1	216	MSTRG.116893	.	0.0903546	-3.46826	0.000486358	0.0370673	down	yes
78093	i	chr11	.	7006574	7006778	MSTRG.41577.1	1	205	MSTRG.41577	ZNF214	0.129045	-2.95406	0.000487125	0.0371186	down	yes
40772	u	chr1	.	143221962	143223118	MSTRG.22520.1	1	1157	MSTRG.22520	.	0.105494	-3.24477	0.000489865	0.0373044	down	yes
354933	i	chr5	.	131888111	131888395	MSTRG.175549.1	1	285	MSTRG.175549	AC034228	0.0982902	-3.34681	0.000489946	0.0373044	down	yes
68033	u	chr10	.	76601739	76602827	MSTRG.36605.1	1	1089	MSTRG.36605	.	0.202822	-2.30171	0.000491248	0.0373644	down	yes
106073	i	chr12	.	42504781	42505734	MSTRG.54652.1	1	954	MSTRG.54652	PRICKLE1	7.1081	2.82946	0.000491458	0.0373686	up	yes
271835	i	chr20	.	48812231	48812526	MSTRG.129959.1	1	296	MSTRG.129959	PREX1	0.0707985	-3.82014	0.000492121	0.0374117	down	yes
145601	u	chr14	.	94345986	94346189	MSTRG.75154.1	1	204	MSTRG.75154	.	0.109003	-3.19755	0.00049358	0.037508	down	yes
441036	i	chr9	.	113963985	113964365	MSTRG.223105.1	1	381	MSTRG.223105	ZNF618	6.71956	2.74837	0.000494003	0.0375329	up	yes
328760	i	chr4	.	97523817	97524092	MSTRG.159332.1	1	276	MSTRG.159332	STPG2	0.13931	-2.84363	0.000494497	0.0375632	down	yes
373305	i	chr6	.	62108397	62108624	MSTRG.184417.1	1	228	MSTRG.184417	KHDRBS2	0.106972	-3.22469	0.000495618	0.037641	down	yes
28893	u	chr1	.	43472575	43472925	MSTRG.16036.1	1	351	MSTRG.16036	.	0.0597654	-4.06454	0.000499434	0.0379161	down	yes
409879	i	chr8	.	3024997	3025508	MSTRG.205233.1	1	512	MSTRG.205233	CSMD1	0.147415	-2.76204	0.000503292	0.0381867	down	yes
414208	i	chr8	.	32351300	32351643	MSTRG.207425.1	1	344	MSTRG.207425	NRG1	0.0205651	-5.60366	0.000504025	0.0382275	down	yes
397805	u	chr7	.	81057989	81058207	MSTRG.198839.1	1	219	MSTRG.198839	.	0.0712332	-3.81131	0.000505929	0.038357	down	yes
323033	i	chr4	.	48886590	48887251	MSTRG.155684.1	1	662	MSTRG.155684	OCIAD2	0.181714	-2.46026	0.000508226	0.0385162	down	yes
342497	u	chr5	.	25080364	25080614	MSTRG.168029.1	1	251	MSTRG.168029	.	0.133517	-2.90491	0.000511834	0.0387596	down	yes
141003	i	chr14	.	64583515	64584268	MSTRG.72888.1	1	754	MSTRG.72888	PPP1R36	0.18091	-2.46665	0.000512294	0.0387869	down	yes
254336	i	chr2	.	177004499	177004739	MSTRG.121318.1	1	241	MSTRG.121318	AC074286	0.000193834	-12.3329	0.000514367	0.0389363	down	yes
184470	i	chr17	.	14309822	14310291	MSTRG.90665.1	1	470	MSTRG.90665	HS3ST3B1	0.256602	-1.9624	0.000516001	0.0390449	down	yes
174501	u	chr16	.	61425730	61426120	MSTRG.86904.1	1	391	MSTRG.86904	.	0.0627003	-3.99538	0.000520171	0.0393375	down	yes
124757	i	chr13	.	38333487	38333815	MSTRG.63429.1	1	329	MSTRG.63429	LINC00571	0.134646	-2.89276	0.000523188	0.0395428	down	yes
300224	i	chr3	.	75938571	75939203	MSTRG.143246.1	1	633	MSTRG.143246	ROBO2	0.0734449	-3.76719	0.000526936	0.0397799	down	yes
169582	i	chr16	.	27418931	27419165	MSTRG.84907.1	1	235	MSTRG.84907	IL21R	14.3218	3.84014	0.000528094	0.039852	up	yes
400415	u	chr7	.	99803283	99803747	MSTRG.200300.1	1	465	MSTRG.200300	.	0.0797653	-3.6481	0.000534643	0.0402917	down	yes
187816	i	chr17	.	30628845	30629323	MSTRG.91832.1	1	479	MSTRG.91832	AC005562	0.133303	-2.90722	0.000537406	0.0404608	down	yes
383654	u	chr6	.	147404000	147404226	MSTRG.191191.1	1	227	MSTRG.191191	.	0.0709603	-3.81684	0.000540059	0.0406216	down	yes
27164	o	chr1	-	35602444	35611064	MSTRG.15287.3	2	623	MSTRG.15287	PSMB2	0.195983	-2.3512	0.000540214	0.0406254	down	yes
40948	i	chr1	+	144635019	144639135	MSTRG.22608.2	1	4117	MSTRG.22608	LINC01632	0.0418214	-4.57961	0.000541267	0.0406968	down	yes
137675	u	chr14	.	41212368	41213522	MSTRG.70780.1	1	1155	MSTRG.70780	.	0.139068	-2.84614	0.000547088	0.0410633	down	yes
375428	u	chr6	.	80906687	80907202	MSTRG.185995.1	1	516	MSTRG.185995	.	0.0652641	-3.93757	0.000550525	0.0412738	down	yes
380643	i	chr6	-	125010010	125025517	MSTRG.189535.1	2	15373	MSTRG.189535	RNF217	12.8064	3.67879	0.000551022	0.0413031	up	yes
106718	u	chr12	.	47639242	47639447	MSTRG.55006.1	1	206	MSTRG.55006	.	0.187597	-2.41429	0.000552426	0.0413783	down	yes
197075	u	chr17	.	71205847	71206110	MSTRG.95306.1	1	264	MSTRG.95306	.	0.0753066	-3.73108	0.000552449	0.0413783	down	yes
390764	u	chr7	.	28833342	28833743	MSTRG.195152.1	1	402	MSTRG.195152	.	0.265562	-1.91288	0.000553059	0.0414105	down	yes
397962	i	chr7	.	83120682	83120985	MSTRG.199019.1	1	304	MSTRG.199019	PCLO	0.0902956	-3.4692	0.000553303	0.0414105	down	yes
84151	i	chr11	-	47838689	47839389	MSTRG.44661.1	1	701	MSTRG.44661	NUP160	0.206592	-2.27514	0.000554873	0.0415042	down	yes
331401	u	chr4	.	117925081	117925337	MSTRG.160932.1	1	257	MSTRG.160932	.	0.10416	-3.26312	0.000556078	0.0415705	down	yes
320506	u	chr4	.	24995177	24995380	MSTRG.154026.1	1	204	MSTRG.154026	.	0.0337053	-4.89088	0.000558863	0.0417547	down	yes
111728	i	chr12	.	64760293	64760524	MSTRG.56694.1	1	232	MSTRG.56694	AC078815	0.117247	-3.09238	0.000560499	0.041861	down	yes
383500	u	chr6	.	146519954	146521061	MSTRG.191101.1	1	1108	MSTRG.191101	.	0.121815	-3.03724	0.000569525	0.0424567	down	yes
92320	j	chr11	+	86821773	86853190	MSTRG.47758.7	2	4832	MSTRG.47758	PRSS23	3.28703	1.71679	0.000577928	0.0430229	up	yes
115682	i	chr12	.	95748499	95748760	MSTRG.59164.1	1	262	MSTRG.59164	NTN4	0.230807	-2.11524	0.000580452	0.0431615	down	yes
289366	u	chr3	.	7802615	7802847	MSTRG.138194.1	1	233	MSTRG.138194	.	0.0341065	-4.87381	0.000582991	0.0433256	down	yes
111265	u	chr12	.	61400492	61400736	MSTRG.56391.1	1	245	MSTRG.56391	.	0.152138	-2.71655	0.000583311	0.0433411	down	yes
61260	u	chr10	.	20420102	20420336	MSTRG.32654.1	1	235	MSTRG.32654	.	0.0566091	-4.14282	0.000584091	0.0433825	down	yes
61321	u	chr10	.	20721589	20721893	MSTRG.32783.1	1	305	MSTRG.32783	.	0.024811	-5.33287	0.000584831	0.043421	down	yes
33201	i	chr1	.	69924044	69924393	MSTRG.18198.1	1	350	MSTRG.18198	LRRC7	0.0665394	-3.90965	0.000591312	0.0438273	down	yes
328790	i	chr4	.	97631390	97631686	MSTRG.159361.1	1	297	MSTRG.159361	STPG2	0.10573	-3.24155	0.000591873	0.0438605	down	yes
445533	u	chr9	.	137290454	137291056	MSTRG.224953.1	1	603	MSTRG.224953	.	0.0965406	-3.37272	0.000592011	0.0438625	down	yes
387699	i	chr7	.	5493051	5493592	MSTRG.193435.1	1	542	MSTRG.193435	FBXL18	0.166035	-2.59044	0.00059391	0.0439615	down	yes
242820	i	chr2	.	87481137	87481415	MSTRG.114904.1	1	279	MSTRG.114904	AC133644	0.119961	-3.05936	0.000601393	0.044448	down	yes
37192	i	chr1	.	99992232	99992602	MSTRG.20702.1	1	371	MSTRG.20702	AC118553	0.160103	-2.64293	0.000602044	0.0444878	down	yes
417477	i	chr8	.	58431763	58432060	MSTRG.209161.1	1	298	MSTRG.209161	UBXN2B	0.187766	-2.413	0.000602433	0.0445081	down	yes
244349	i	chr2	.	99347583	99348235	MSTRG.115603.1	1	653	MSTRG.115603	EIF5B	0.491892	-1.02359	0.00060259	0.0445113	down	yes
202566	u	chr18	.	11235128	11235480	MSTRG.97188.1	1	353	MSTRG.97188	.	0.000289716	-11.7531	0.000604662	0.0446402	down	yes
269176	i	chr20	-	35029669	35030237	MSTRG.128920.1	1	569	MSTRG.128920	TRPC4AP	0.0961055	-3.37924	0.000604678	0.0446402	down	yes
424240	i	chr8	.	109545000	109545785	MSTRG.213466.1	1	786	MSTRG.213466	EBAG9	0.265133	-1.91521	0.000609649	0.044967	down	yes
147661	i	chr14	.	103809550	103810355	MSTRG.76052.1	1	806	MSTRG.76052	PPP1R13B	0.116301	-3.10407	0.000609679	0.044967	down	yes
177231	o	chr16	-	72852198	72919379	MSTRG.88002.1	2	14888	MSTRG.88002	ZFHX3	2.40249	1.26453	0.000611303	0.0450697	up	yes
387826	i	chr7	.	5998098	5998680	MSTRG.193477.1	1	583	MSTRG.193477	PMS2	0.106549	-3.23041	0.000612479	0.0451368	down	yes
407973	u	chr7	.	150019964	150020264	MSTRG.204222.1	1	301	MSTRG.204222	.	0.0250802	-5.31731	0.000614407	0.0452474	down	yes
237720	i	chr2	-	54567601	54581576	MSTRG.112362.1	2	13603	MSTRG.112362	SPTBN1	2.2506	1.17031	0.000617824	0.0454476	up	yes
270876	u	chr20	.	44244678	44245285	MSTRG.129561.1	1	608	MSTRG.129561	.	0.173216	-2.52936	0.000619425	0.0455482	down	yes
41532	i	chr1	.	147323109	147324421	MSTRG.22820.1	1	1313	MSTRG.22820	LINC00624	0.0870599	-3.52185	0.000621304	0.0456778	down	yes
334375	i	chr4	.	143916565	143917529	MSTRG.162935.1	1	965	MSTRG.162935	AC107223	0.172278	-2.53719	0.000627024	0.046055	down	yes
4804	i	X	.	42591970	42592215	MSTRG.3321.1	1	246	MSTRG.3321	Z93403	0.059072	-4.08138	0.000627663	0.0460846	down	yes
328802	i	chr4	.	97654197	97655799	MSTRG.159373.1	1	1603	MSTRG.159373	STPG2	0.252628	-1.98492	0.000631374	0.046305	down	yes
414091	i	chr8	.	31763093	31763672	MSTRG.207315.1	1	580	MSTRG.207315	NRG1	0.0448048	-4.4802	0.000631964	0.0463395	down	yes
61288	u	chr10	.	20544586	20544971	MSTRG.32686.1	1	386	MSTRG.32686	.	0.164021	-2.60805	0.000633378	0.0464345	down	yes
292306	i	chr3	.	27264776	27265029	MSTRG.139767.1	1	254	MSTRG.139767	NEK10	0.000410579	-11.2501	0.000637003	0.0466471	down	yes
420291	i	chr8	.	81612947	81613278	MSTRG.210945.1	1	332	MSTRG.210945	IMPA1P1	0.00971441	-6.68566	0.000637113	0.0466471	down	yes
66449	i	chr10	.	67094573	67094830	MSTRG.35962.1	1	258	MSTRG.35962	CTNNA3	0.012194	-6.35768	0.000640262	0.0468688	down	yes
72200	i	chr10	+	103678314	103682203	MSTRG.38798.1	2	3694	MSTRG.38798	SH3PXD2A	2.49497	1.31902	0.000642486	0.047014	up	yes
335816	i	chr4	.	154672300	154672563	MSTRG.163736.1	1	264	MSTRG.163736	LRAT	0.0134927	-6.21168	0.000643744	0.0470869	down	yes
238030	u	chr2	.	55829560	55829782	MSTRG.112471.1	1	223	MSTRG.112471	.	0.0671334	-3.89683	0.000644975	0.0471509	down	yes
387659	i	chr7	+	5365800	5367744	MSTRG.193407.1	2	650	MSTRG.193407	TNRC18	0.094458	-3.40418	0.000645079	0.0471509	down	yes
217949	u	chr19	.	18828118	18828505	MSTRG.104252.1	1	388	MSTRG.104252	.	0.0707957	-3.82019	0.000648263	0.0473579	down	yes
430724	i	chr9	.	12782350	12783825	MSTRG.216729.1	1	1476	MSTRG.216729	LURAP1L-AS1	0.369418	-1.43667	0.000648834	0.0473898	down	yes
367084	i	chr6	.	27512429	27512663	MSTRG.181667.1	1	235	MSTRG.181667	AL021918	0.0409103	-4.61139	0.000649316	0.0474073	down	yes
66286	i	chr10	.	65644486	65644781	MSTRG.35804.1	1	296	MSTRG.35804	LINC01515	0.195864	-2.35208	0.000649673	0.0474246	down	yes
153006	i	chr15	.	44434976	44435909	MSTRG.78298.1	1	934	MSTRG.78298	CTDSPL2	0.2353	-2.08742	0.000650068	0.0474396	down	yes
159545	i	chr15	.	81076534	81076788	MSTRG.81095.1	1	255	MSTRG.81095	CFAP161	0.0226694	-5.46311	0.000650122	0.0474396	down	yes
432254	u	chr9	.	27075353	27075895	MSTRG.217991.1	1	543	MSTRG.217991	.	0.634228	-0.656926	0.000651846	0.0475511	down	no
269627	i	chr20	-	36093024	36107514	MSTRG.128988.1	2	2242	MSTRG.128988	EPB41L1	0.111739	-3.1618	0.000653328	0.047638	down	yes
358981	u	chr5	.	151932352	151932556	MSTRG.177288.1	1	205	MSTRG.177288	.	0.00666423	-7.22935	0.000654102	0.0476855	down	yes
95777	u	chr11	.	114626437	114627198	MSTRG.49803.1	1	762	MSTRG.49803	.	0.111091	-3.17019	0.000660672	0.0481107	down	yes
233475	i	chr2	.	25053496	25053885	MSTRG.110191.1	1	390	MSTRG.110191	EFR3B	0.193342	-2.37078	0.000661017	0.0481268	down	yes
72360	i	chr10	.	105048044	105048295	MSTRG.38906.1	1	252	MSTRG.38906	SORCS3	0.080886	-3.62797	0.000663729	0.0482955	down	yes
33232	i	chr1	.	70164132	70164400	MSTRG.18219.1	1	269	MSTRG.18219	LRRC40	0.442346	-1.17675	0.000665272	0.0483825	down	yes
33657	i	chr1	.	72363504	72366123	MSTRG.18555.1	1	2620	MSTRG.18555	AL513166	0.409752	-1.28718	0.000666105	0.0484341	down	yes
434707	i	chr9	.	61857602	61859934	MSTRG.219339.1	1	2333	MSTRG.219339	FAM27C	0.218204	-2.19625	0.00066788	0.0485271	down	yes
137169	i	chr14	.	37516809	37517250	MSTRG.70636.1	1	442	MSTRG.70636	MIPOL1	0.220471	-2.18134	0.000668288	0.0485477	down	yes
264667	i	chr20	.	1760587	1761285	MSTRG.126530.1	1	699	MSTRG.126530	AL109809	0.384616	-1.37851	0.000671644	0.0487552	down	yes
13556	i	X	+	115843932	115853727	MSTRG.9160.50	3	851	MSTRG.9160	DANT2	0.0896433	-3.47966	0.00067332	0.0488678	down	yes
185819	u	chr17	.	19060353	19060607	MSTRG.91175.1	1	255	MSTRG.91175	.	0.176609	-2.50137	0.000673631	0.0488813	down	yes
193245	i	chr17	-	49423341	49424020	MSTRG.93782.1	1	680	MSTRG.93782	AC091180	0.341352	-1.55067	0.000675947	0.049013	down	yes
187815	i	chr17	.	30627553	30628410	MSTRG.91831.1	1	858	MSTRG.91831	AC005562	0.149442	-2.74234	0.000680381	0.0492829	down	yes
63730	u	chr10	-	41910276	41911265	MSTRG.34235.4	2	960	MSTRG.34235	.	0.00378195	-8.04665	0.000681366	0.0493418	down	yes
307581	i	chr3	.	136588657	136588924	MSTRG.147473.1	1	268	MSTRG.147473	STAG1	0.145299	-2.78291	0.000683531	0.0494711	down	yes
349889	i	chr5	.	87972517	87972724	MSTRG.172396.1	1	208	MSTRG.172396	AC114971	0.00036995	-11.4004	0.000686144	0.0496235	down	yes
119575	i	chr12	.	120459589	120459830	MSTRG.60950.1	1	242	MSTRG.60950	GATC	0.217908	-2.19821	0.000686491	0.0496315	down	yes
189246	i	chr17	.	37632948	37633262	MSTRG.92585.1	1	315	MSTRG.92585	DDX52	0.223634	-2.16079	0.000686547	0.0496315	down	yes
379513	i	chr6	.	113958814	113959062	MSTRG.188747.1	1	249	MSTRG.188747	HDAC2	0.383558	-1.38248	0.000686635	0.0496315	down	yes
156451	i	chr15	.	65926543	65926886	MSTRG.79829.1	1	344	MSTRG.79829	MEGF11	6.05096	2.59716	0.000687037	0.0496514	up	yes
436945	i	chr9	.	83911312	83911524	MSTRG.220753.1	1	213	MSTRG.220753	KIF27	0.266126	-1.90982	0.000689427	0.0497964	down	yes
