# Supplementary material for: Whole-Transcriptome Sequencing of Knee Joint Cartilage from Kashin–Beck Disease and Osteoarthritis Patients
Source: Int J Mol Sci. 2024 Apr 15;25(8):4348. doi: 10.3390/ijms25084348 (PMC11049856; doi:10.3390/ijms25084348)
Supplement: Supplementary file 1 [file ijms-25-04348-s001.zip › Supplementary Table S5_KBDVSOA_GO_enrichment_lncRNA.xlsx]

## Sheet: Sheet1
Supplementary Table S5. GO enrichment analysis results of target genes of differentially expressed lncRNA between KBD and OA
GO_ID	GO_Term	GO_function	GO_class	S gene number	TS gene number	B gene number	TB gene number	pvalue
GO:0050786	RAGE receptor binding	molecular_function	6	6	1020	21	15887	0.00162337
GO:0071636	positive regulation of transforming growth factor beta production	biological_process	8	5	1020	19	15887	0.00589077
GO:0099106	ion channel regulator activity	molecular_function	5	4	1020	13	15887	0.00756356
GO:0043269	regulation of ion transport	biological_process	7	4	1020	15	15887	0.0130302
GO:0044224	juxtaparanode region of axon	cellular_component	6	4	1020	16	15887	0.0165073
GO:0051106	positive regulation of DNA ligation	biological_process	9	3	1020	9	15887	0.0165436
GO:0002826	negative regulation of T-helper 1 type immune response	biological_process	10	3	1020	9	15887	0.0165436
GO:0042148	strand invasion	biological_process	8	3	1020	10	15887	0.022522
GO:1904631	response to glucoside	biological_process	7	2	1020	4	15887	0.0226491
GO:1900035	negative regulation of cellular response to heat	biological_process	7	2	1020	4	15887	0.0226491
GO:0046705	CDP biosynthetic process	biological_process	12	2	1020	4	15887	0.0226491
GO:0099025	anchored component of postsynaptic membrane	cellular_component	8	2	1020	4	15887	0.0226491
GO:0006225	UDP biosynthetic process	biological_process	12	2	1020	4	15887	0.0226491
GO:0071971	extracellular exosome assembly	biological_process	7	2	1020	4	15887	0.0226491
GO:0072254	metanephric glomerular mesangial cell differentiation	biological_process	9	2	1020	4	15887	0.0226491
GO:0036053	glomerular endothelium fenestra	cellular_component	6	2	1020	4	15887	0.0226491
GO:0032602	chemokine production	biological_process	5	2	1020	4	15887	0.0226491
GO:0033028	myeloid cell apoptotic process	biological_process	7	2	1020	4	15887	0.0226491
GO:0070488	neutrophil aggregation	biological_process	8	2	1020	4	15887	0.0226491
GO:0035581	sequestering of extracellular ligand from receptor	biological_process	10	2	1020	4	15887	0.0226491
GO:0072089	stem cell proliferation	biological_process	4	4	1020	18	15887	0.0250654
GO:0043199	sulfate binding	molecular_function	6	3	1020	11	15887	0.0295163
GO:0035910	ascending aorta morphogenesis	biological_process	5	3	1020	11	15887	0.0295163
GO:0048386	positive regulation of retinoic acid receptor signaling pathway	biological_process	9	3	1020	11	15887	0.0295163
GO:0072344	rescue of stalled ribosome	biological_process	9	3	1020	11	15887	0.0295163
GO:0043653	mitochondrial fragmentation involved in apoptotic process	biological_process	8	4	1020	19	15887	0.0301786
GO:0045743	positive regulation of fibroblast growth factor receptor signaling pathway	biological_process	9	4	1020	19	15887	0.0301786
GO:0060323	head morphogenesis	biological_process	5	4	1020	19	15887	0.0301786
GO:2000649	regulation of sodium ion transmembrane transporter activity	biological_process	8	5	1020	28	15887	0.0309045
GO:0033862	UMP kinase activity	molecular_function	9	2	1020	5	15887	0.0361537
GO:0042488	positive regulation of odontogenesis of dentin-containing tooth	biological_process	10	2	1020	5	15887	0.0361537
GO:0005035	death receptor activity	molecular_function	6	2	1020	5	15887	0.0361537
GO:1901898	negative regulation of relaxation of cardiac muscle	biological_process	8	2	1020	5	15887	0.0361537
GO:0098847	sequence-specific single stranded DNA binding	molecular_function	8	2	1020	5	15887	0.0361537
GO:0021782	glial cell development	biological_process	6	3	1020	12	15887	0.0375173
GO:0120183	positive regulation of focal adhesion disassembly	biological_process	9	3	1020	12	15887	0.0375173
GO:0048935	peripheral nervous system neuron development	biological_process	7	4	1020	21	15887	0.0421198
GO:0097502	mannosylation	biological_process	5	5	1020	31	15887	0.0456665
GO:0003289	atrial septum primum morphogenesis	biological_process	7	3	1020	13	15887	0.0465035
GO:1900748	positive regulation of vascular endothelial growth factor signaling pathway	biological_process	9	3	1020	13	15887	0.0465035
GO:0045569	TRAIL binding	molecular_function	5	3	1020	13	15887	0.0465035
GO:0019853	L-ascorbic acid biosynthetic process	biological_process	8	2	1020	6	15887	0.0519524
GO:0035359	negative regulation of peroxisome proliferator activated receptor signaling pathway	biological_process	9	2	1020	6	15887	0.0519524
GO:0016213	linoleoyl-CoA desaturase activity	molecular_function	8	2	1020	6	15887	0.0519524
GO:0000150	recombinase activity	molecular_function	5	2	1020	6	15887	0.0519524
GO:0035759	mesangial cell-matrix adhesion	biological_process	7	2	1020	6	15887	0.0519524
GO:2001015	negative regulation of skeletal muscle cell differentiation	biological_process	8	2	1020	6	15887	0.0519524
GO:2001045	negative regulation of integrin-mediated signaling pathway	biological_process	9	2	1020	6	15887	0.0519524
GO:1990116	ribosome-associated ubiquitin-dependent protein catabolic process	biological_process	12	2	1020	6	15887	0.0519524
GO:0061502	early endosome to recycling endosome transport	biological_process	8	2	1020	6	15887	0.0519524
GO:1990112	RQC complex	cellular_component	4	2	1020	6	15887	0.0519524
GO:1990426	mitotic recombination-dependent replication fork processing	biological_process	10	2	1020	6	15887	0.0519524
GO:1902437	positive regulation of male mating behavior	biological_process	7	2	1020	6	15887	0.0519524
GO:0019867	outer membrane	cellular_component	4	2	1020	6	15887	0.0519524
GO:0000730	DNA recombinase assembly	biological_process	9	2	1020	6	15887	0.0519524
GO:0072378	blood coagulation, fibrin clot formation	biological_process	8	2	1020	6	15887	0.0519524
GO:1900038	negative regulation of cellular response to hypoxia	biological_process	7	2	1020	6	15887	0.0519524
GO:2000780	negative regulation of double-strand break repair	biological_process	11	3	1020	14	15887	0.0564431
GO:0004908	interleukin-1 receptor activity	molecular_function	7	3	1020	14	15887	0.0564431
GO:0038001	paracrine signaling	biological_process	6	3	1020	14	15887	0.0564431
GO:0060290	transdifferentiation	biological_process	6	3	1020	14	15887	0.0564431
GO:0001844	protein insertion into mitochondrial membrane involved in apoptotic signaling pathway	biological_process	9	3	1020	14	15887	0.0564431
GO:0099562	maintenance of postsynaptic density structure	biological_process	9	3	1020	14	15887	0.0564431
GO:2000146	negative regulation of cell motility	biological_process	7	4	1020	24	15887	0.06433
GO:0036297	interstrand cross-link repair	biological_process	9	10	1020	91	15887	0.066332
GO:0033504	floor plate development	biological_process	5	3	1020	15	15887	0.0672963
GO:0007127	meiosis I	biological_process	7	3	1020	15	15887	0.0672963
GO:0007406	negative regulation of neuroblast proliferation	biological_process	10	3	1020	15	15887	0.0672963
GO:0035662	Toll-like receptor 4 binding	molecular_function	7	2	1020	7	15887	0.0696955
GO:0061026	cardiac muscle tissue regeneration	biological_process	7	2	1020	7	15887	0.0696955
GO:1900168	positive regulation of glial cell-derived neurotrophic factor secretion	biological_process	9	2	1020	7	15887	0.0696955
GO:0009041	uridylate kinase activity	molecular_function	8	2	1020	7	15887	0.0696955
GO:0048642	negative regulation of skeletal muscle tissue development	biological_process	10	2	1020	7	15887	0.0696955
GO:1903894	regulation of IRE1-mediated unfolded protein response	biological_process	9	2	1020	7	15887	0.0696955
GO:0051795	positive regulation of timing of catagen	biological_process	10	2	1020	7	15887	0.0696955
GO:0038172	interleukin-33-mediated signaling pathway	biological_process	7	2	1020	7	15887	0.0696955
GO:1900212	negative regulation of mesenchymal cell apoptotic process involved in metanephros development	biological_process	10	2	1020	7	15887	0.0696955
GO:0001161	intronic transcription regulatory region sequence-specific DNA binding	molecular_function	9	2	1020	7	15887	0.0696955
GO:0004181	metallocarboxypeptidase activity	molecular_function	9	6	1020	46	15887	0.0723344
GO:1902043	positive regulation of extrinsic apoptotic signaling pathway via death domain receptors	biological_process	11	4	1020	25	15887	0.0728564
GO:0045216	cell-cell junction organization	biological_process	6	5	1020	36	15887	0.0781775
GO:0060430	lung saccule development	biological_process	5	3	1020	16	15887	0.0790168
GO:0017128	phospholipid scramblase activity	molecular_function	6	3	1020	16	15887	0.0790168
GO:0061042	vascular wound healing	biological_process	7	3	1020	16	15887	0.0790168
GO:0042171	lysophosphatidic acid acyltransferase activity	molecular_function	8	3	1020	16	15887	0.0790168
GO:0031091	platelet alpha granule	cellular_component	9	4	1020	26	15887	0.0819248
GO:0035145	exon-exon junction complex	cellular_component	4	5	1020	37	15887	0.0858547
GO:0006222	UMP biosynthetic process	biological_process	12	2	1020	8	15887	0.0890689
GO:0032119	sequestering of zinc ion	biological_process	6	2	1020	8	15887	0.0890689
GO:0035470	positive regulation of vascular wound healing	biological_process	9	2	1020	8	15887	0.0890689
GO:0009220	pyrimidine ribonucleotide biosynthetic process	biological_process	11	2	1020	8	15887	0.0890689
GO:0060977	coronary vasculature morphogenesis	biological_process	7	2	1020	8	15887	0.0890689
GO:0042482	positive regulation of odontogenesis	biological_process	9	2	1020	8	15887	0.0890689
GO:0071586	CAAX-box protein processing	biological_process	9	2	1020	8	15887	0.0890689
GO:2001271	negative regulation of cysteine-type endopeptidase activity involved in execution phase of apoptosis	biological_process	11	2	1020	8	15887	0.0890689
GO:0045040	protein insertion into mitochondrial outer membrane	biological_process	7	2	1020	8	15887	0.0890689
GO:0060741	prostate gland stromal morphogenesis	biological_process	5	2	1020	8	15887	0.0890689
GO:0032485	regulation of Ral protein signal transduction	biological_process	11	2	1020	8	15887	0.0890689
GO:2000323	negative regulation of glucocorticoid receptor signaling pathway	biological_process	10	2	1020	8	15887	0.0890689
GO:0008745	N-acetylmuramoyl-L-alanine amidase activity	molecular_function	7	2	1020	8	15887	0.0890689
GO:0072011	glomerular endothelium development	biological_process	8	2	1020	8	15887	0.0890689
GO:0071657	positive regulation of granulocyte colony-stimulating factor production	biological_process	9	2	1020	8	15887	0.0890689
GO:0004127	cytidylate kinase activity	molecular_function	8	2	1020	8	15887	0.0890689
GO:1900026	positive regulation of substrate adhesion-dependent cell spreading	biological_process	10	8	1020	72	15887	0.0895809
GO:0003215	cardiac right ventricle morphogenesis	biological_process	7	4	1020	27	15887	0.0915195
GO:0050291	sphingosine N-acyltransferase activity	molecular_function	8	3	1020	17	15887	0.0915533
GO:0015037	peptide disulfide oxidoreductase activity	molecular_function	7	3	1020	17	15887	0.0915533
GO:0010833	telomere maintenance via telomere lengthening	biological_process	9	3	1020	17	15887	0.0915533
GO:0035727	lysophosphatidic acid binding	molecular_function	6	3	1020	17	15887	0.0915533
GO:0016410	N-acyltransferase activity	molecular_function	7	5	1020	38	15887	0.0939114
GO:0051149	positive regulation of muscle cell differentiation	biological_process	8	6	1020	50	15887	0.0993519
GO:0060413	atrial septum morphogenesis	biological_process	6	4	1020	28	15887	0.101622
GO:0031005	filamin binding	molecular_function	6	3	1020	18	15887	0.104851
GO:1900246	positive regulation of RIG-I signaling pathway	biological_process	8	3	1020	18	15887	0.104851
GO:0008064	regulation of actin polymerization or depolymerization	biological_process	7	3	1020	18	15887	0.104851
GO:0017185	peptidyl-lysine hydroxylation	biological_process	10	3	1020	18	15887	0.104851
GO:0005915	zonula adherens	cellular_component	6	3	1020	18	15887	0.104851
GO:0050847	progesterone receptor signaling pathway	biological_process	7	3	1020	18	15887	0.104851
GO:0003183	mitral valve morphogenesis	biological_process	7	3	1020	18	15887	0.104851
GO:0060998	regulation of dendritic spine development	biological_process	12	3	1020	18	15887	0.104851
GO:0048709	oligodendrocyte differentiation	biological_process	7	6	1020	51	15887	0.106836
GO:0046625	sphingolipid binding	molecular_function	5	2	1020	9	15887	0.10979
GO:0060485	mesenchyme development	biological_process	6	2	1020	9	15887	0.10979
GO:0060486	club cell differentiation	biological_process	8	2	1020	9	15887	0.10979
GO:0042634	regulation of hair cycle	biological_process	6	2	1020	9	15887	0.10979
GO:0005176	ErbB-2 class receptor binding	molecular_function	6	2	1020	9	15887	0.10979
GO:1902617	response to fluoride	biological_process	6	2	1020	9	15887	0.10979
GO:0043320	natural killer cell degranulation	biological_process	9	2	1020	9	15887	0.10979
GO:0004849	uridine kinase activity	molecular_function	9	2	1020	9	15887	0.10979
GO:0072757	cellular response to camptothecin	biological_process	7	2	1020	9	15887	0.10979
GO:0003186	tricuspid valve morphogenesis	biological_process	7	2	1020	9	15887	0.10979
GO:0006312	mitotic recombination	biological_process	9	2	1020	9	15887	0.10979
GO:2000676	positive regulation of type B pancreatic cell apoptotic process	biological_process	11	2	1020	9	15887	0.10979
GO:2000563	positive regulation of CD4-positive, alpha-beta T cell proliferation	biological_process	13	2	1020	9	15887	0.10979
GO:0065004	protein-DNA complex assembly	biological_process	8	2	1020	9	15887	0.10979
GO:0014827	intestine smooth muscle contraction	biological_process	9	2	1020	9	15887	0.10979
GO:0002079	inner acrosomal membrane	cellular_component	7	2	1020	9	15887	0.10979
GO:0010876	lipid localization	biological_process	5	2	1020	9	15887	0.10979
GO:0090315	negative regulation of protein targeting to membrane	biological_process	11	2	1020	9	15887	0.10979
GO:0008610	lipid biosynthetic process	biological_process	6	5	1020	40	15887	0.111129
GO:0072687	meiotic spindle	cellular_component	7	3	1020	19	15887	0.118852
GO:0006734	NADH metabolic process	biological_process	4	3	1020	19	15887	0.118852
GO:0002726	positive regulation of T cell cytokine production	biological_process	11	3	1020	19	15887	0.118852
GO:0030449	regulation of complement activation	biological_process	7	7	1020	65	15887	0.122113
GO:0070463	tubulin-dependent ATPase activity	molecular_function	11	1	1020	2	15887	0.124289
GO:0009590	detection of gravity	biological_process	6	1	1020	2	15887	0.124289
GO:1902118	calcidiol binding	molecular_function	5	1	1020	2	15887	0.124289
GO:0010769	regulation of cell morphogenesis involved in differentiation	biological_process	8	1	1020	2	15887	0.124289
GO:0098674	extrinsic component of neuronal dense core vesicle membrane	cellular_component	5	1	1020	2	15887	0.124289
GO:2000518	negative regulation of T-helper 1 cell activation	biological_process	12	1	1020	2	15887	0.124289
GO:0070091	glucagon secretion	biological_process	11	1	1020	2	15887	0.124289
GO:0000153	cytoplasmic ubiquitin ligase complex	cellular_component	6	1	1020	2	15887	0.124289
GO:1990864	response to growth hormone-releasing hormone	biological_process	6	1	1020	2	15887	0.124289
GO:1904699	positive regulation of acinar cell proliferation	biological_process	9	1	1020	2	15887	0.124289
GO:0055080	cation homeostasis	biological_process	8	1	1020	2	15887	0.124289
GO:0038129	ERBB3 signaling pathway	biological_process	9	1	1020	2	15887	0.124289
GO:0090074	negative regulation of protein homodimerization activity	biological_process	8	1	1020	2	15887	0.124289
GO:0036317	tyrosyl-RNA phosphodiesterase activity	molecular_function	8	1	1020	2	15887	0.124289
GO:0055002	striated muscle cell development	biological_process	7	1	1020	2	15887	0.124289
GO:0102279	lecithin:11-cis retinol acyltransferase activity	molecular_function	7	1	1020	2	15887	0.124289
GO:1901881	positive regulation of protein depolymerization	biological_process	9	1	1020	2	15887	0.124289
GO:0099550	trans-synaptic signaling, modulating synaptic transmission	biological_process	9	1	1020	2	15887	0.124289
GO:0021877	forebrain neuron fate commitment	biological_process	7	1	1020	2	15887	0.124289
GO:0120211	proacrosomal vesicle fusion	NA	NA	1	1020	2	15887	0.124289
GO:0031128	developmental induction	biological_process	4	1	1020	2	15887	0.124289
GO:1990878	cellular response to gastrin	biological_process	8	1	1020	2	15887	0.124289
GO:0051264	mono-olein transacylation activity	molecular_function	9	1	1020	2	15887	0.124289
GO:0047173	phosphatidylcholine-retinol O-acyltransferase activity	molecular_function	8	1	1020	2	15887	0.124289
GO:0004584	dolichyl-phosphate-mannose-glycolipid alpha-mannosyltransferase activity	molecular_function	8	1	1020	2	15887	0.124289
GO:0150142	positive regulation of CD86 biosynthetic process	NA	NA	1	1020	2	15887	0.124289
GO:0002112	interleukin-33 receptor binding	molecular_function	7	1	1020	2	15887	0.124289
GO:0005477	pyruvate secondary active transmembrane transporter activity	molecular_function	9	1	1020	2	15887	0.124289
GO:0150145	positive regulation of CD80 biosynthetic process	NA	NA	1	1020	2	15887	0.124289
GO:0016416	O-palmitoyltransferase activity	molecular_function	8	1	1020	2	15887	0.124289
GO:0060064	Spemann organizer formation at the anterior end of the primitive streak	biological_process	6	1	1020	2	15887	0.124289
GO:0097090	presynaptic membrane organization	biological_process	6	1	1020	2	15887	0.124289
GO:0120042	negative regulation of macrophage proliferation	biological_process	9	1	1020	2	15887	0.124289
GO:0051265	diolein transacylation activity	molecular_function	9	1	1020	2	15887	0.124289
GO:0006863	purine nucleobase transport	biological_process	8	1	1020	2	15887	0.124289
GO:2001165	positive regulation of phosphorylation of RNA polymerase II C-terminal domain serine 2 residues	biological_process	12	1	1020	2	15887	0.124289
GO:0099023	vesicle tethering complex	cellular_component	4	1	1020	2	15887	0.124289
GO:0009353	mitochondrial oxoglutarate dehydrogenase complex	cellular_component	7	1	1020	2	15887	0.124289
GO:2000513	positive regulation of granzyme A production	biological_process	9	1	1020	2	15887	0.124289
GO:0004919	interleukin-9 receptor activity	molecular_function	7	1	1020	2	15887	0.124289
GO:0043265	ectoplasm	cellular_component	6	1	1020	2	15887	0.124289
GO:1903492	response to acetylsalicylate	biological_process	6	1	1020	2	15887	0.124289
GO:0046942	carboxylic acid transport	biological_process	9	1	1020	2	15887	0.124289
GO:0072377	blood coagulation, common pathway	biological_process	8	1	1020	2	15887	0.124289
GO:2000538	positive regulation of B cell chemotaxis	biological_process	10	1	1020	2	15887	0.124289
GO:1990448	exon-exon junction complex binding	molecular_function	5	1	1020	2	15887	0.124289
GO:0098885	modification of postsynaptic actin cytoskeleton	biological_process	8	1	1020	2	15887	0.124289
GO:1990771	clathrin-dependent extracellular exosome endocytosis	biological_process	8	1	1020	2	15887	0.124289
GO:0070260	5'-tyrosyl-DNA phosphodiesterase activity	molecular_function	9	1	1020	2	15887	0.124289
GO:0035782	mature natural killer cell chemotaxis	biological_process	8	1	1020	2	15887	0.124289
GO:1900483	regulation of protein targeting to vacuolar membrane	biological_process	11	1	1020	2	15887	0.124289
GO:0086024	adenylate cyclase-activating adrenergic receptor signaling pathway involved in positive regulation of heart rate	biological_process	12	1	1020	2	15887	0.124289
GO:0001850	complement component C3a binding	molecular_function	6	1	1020	2	15887	0.124289
GO:0010789	meiotic sister chromatid cohesion involved in meiosis I	biological_process	7	1	1020	2	15887	0.124289
GO:0071206	establishment of protein localization to juxtaparanode region of axon	biological_process	7	1	1020	2	15887	0.124289
GO:0010186	positive regulation of cellular defense response	biological_process	9	1	1020	2	15887	0.124289
GO:1905474	canonical Wnt signaling pathway involved in stem cell proliferation	biological_process	10	1	1020	2	15887	0.124289
GO:0036153	triglyceride acyl-chain remodeling	biological_process	10	1	1020	2	15887	0.124289
GO:0007576	nucleolar fragmentation	biological_process	8	1	1020	2	15887	0.124289
GO:0060668	regulation of branching involved in salivary gland morphogenesis by extracellular matrix-epithelial cell signaling	biological_process	6	1	1020	2	15887	0.124289
GO:1990867	response to gastrin	biological_process	7	1	1020	2	15887	0.124289
GO:1990798	pancreas regeneration	biological_process	7	1	1020	2	15887	0.124289
GO:0005350	pyrimidine nucleobase transmembrane transporter activity	molecular_function	6	1	1020	2	15887	0.124289
GO:0045079	negative regulation of chemokine biosynthetic process	biological_process	9	1	1020	2	15887	0.124289
GO:0061888	regulation of astrocyte activation	biological_process	12	1	1020	2	15887	0.124289
GO:0006626	protein targeting to mitochondrion	biological_process	12	6	1020	54	15887	0.130956
GO:0048663	neuron fate commitment	biological_process	6	6	1020	54	15887	0.130956
GO:0046483	heterocycle metabolic process	biological_process	5	2	1020	10	15887	0.131607
GO:1900245	positive regulation of MDA-5 signaling pathway	biological_process	8	2	1020	10	15887	0.131607
GO:0001714	endodermal cell fate specification	biological_process	6	2	1020	10	15887	0.131607
GO:0061309	cardiac neural crest cell development involved in outflow tract morphogenesis	biological_process	9	2	1020	10	15887	0.131607
GO:0051754	meiotic sister chromatid cohesion, centromeric	biological_process	7	2	1020	10	15887	0.131607
GO:0016019	peptidoglycan immune receptor activity	molecular_function	7	2	1020	10	15887	0.131607
GO:1901315	negative regulation of histone H2A K63-linked ubiquitination	biological_process	12	2	1020	10	15887	0.131607
GO:0046040	IMP metabolic process	biological_process	11	2	1020	10	15887	0.131607
GO:0045321	leukocyte activation	biological_process	5	2	1020	10	15887	0.131607
GO:0060510	type II pneumocyte differentiation	biological_process	9	2	1020	10	15887	0.131607
GO:2000779	regulation of double-strand break repair	biological_process	10	2	1020	10	15887	0.131607
GO:0070291	N-acylethanolamine metabolic process	biological_process	7	2	1020	10	15887	0.131607
GO:0003253	cardiac neural crest cell migration involved in outflow tract morphogenesis	biological_process	9	2	1020	10	15887	0.131607
GO:0043152	induction of bacterial agglutination	biological_process	8	2	1020	10	15887	0.131607
GO:0035021	negative regulation of Rac protein signal transduction	biological_process	12	2	1020	10	15887	0.131607
GO:0060509	type I pneumocyte differentiation	biological_process	8	2	1020	10	15887	0.131607
GO:0016098	monoterpenoid metabolic process	biological_process	9	2	1020	10	15887	0.131607
GO:0034663	endoplasmic reticulum chaperone complex	cellular_component	4	3	1020	20	15887	0.133497
GO:0000722	telomere maintenance via recombination	biological_process	9	3	1020	20	15887	0.133497
GO:0001893	maternal placenta development	biological_process	5	3	1020	20	15887	0.133497
GO:0016322	neuron remodeling	biological_process	7	3	1020	20	15887	0.133497
GO:0061575	cyclin-dependent protein serine/threonine kinase activator activity	molecular_function	8	3	1020	20	15887	0.133497
GO:2001028	positive regulation of endothelial cell chemotaxis	biological_process	11	3	1020	20	15887	0.133497
GO:0051639	actin filament network formation	biological_process	7	3	1020	20	15887	0.133497
GO:2001223	negative regulation of neuron migration	biological_process	9	3	1020	20	15887	0.133497
GO:0050806	positive regulation of synaptic transmission	biological_process	8	4	1020	31	15887	0.134763
GO:0040037	negative regulation of fibroblast growth factor receptor signaling pathway	biological_process	9	4	1020	31	15887	0.134763
GO:2001244	positive regulation of intrinsic apoptotic signaling pathway	biological_process	10	7	1020	67	15887	0.137134
GO:0051493	regulation of cytoskeleton organization	biological_process	8	6	1020	55	15887	0.139529
GO:0046580	negative regulation of Ras protein signal transduction	biological_process	11	6	1020	55	15887	0.139529
GO:0010842	retina layer formation	biological_process	5	5	1020	43	15887	0.139556
GO:0032703	negative regulation of interleukin-2 production	biological_process	8	5	1020	43	15887	0.139556
GO:0000400	four-way junction DNA binding	molecular_function	8	4	1020	32	15887	0.146676
GO:0007340	acrosome reaction	biological_process	4	4	1020	32	15887	0.146676
GO:0032754	positive regulation of interleukin-5 production	biological_process	8	3	1020	21	15887	0.148727
GO:0005742	mitochondrial outer membrane translocase complex	cellular_component	6	3	1020	21	15887	0.148727
GO:0031065	positive regulation of histone deacetylation	biological_process	11	3	1020	21	15887	0.148727
GO:0050544	arachidonic acid binding	molecular_function	8	2	1020	11	15887	0.154294
GO:2000553	positive regulation of T-helper 2 cell cytokine production	biological_process	12	2	1020	11	15887	0.154294
GO:2000171	negative regulation of dendrite development	biological_process	12	2	1020	11	15887	0.154294
GO:2000556	positive regulation of T-helper 1 cell cytokine production	biological_process	12	2	1020	11	15887	0.154294
GO:0060390	regulation of SMAD protein signal transduction	biological_process	9	2	1020	11	15887	0.154294
GO:0003357	noradrenergic neuron differentiation	biological_process	7	2	1020	11	15887	0.154294
GO:0032613	interleukin-10 production	biological_process	5	2	1020	11	15887	0.154294
GO:0016765	transferase activity, transferring alkyl or aryl (other than methyl) groups	molecular_function	5	2	1020	11	15887	0.154294
GO:0071681	cellular response to indole-3-methanol	biological_process	7	2	1020	11	15887	0.154294
GO:0005577	fibrinogen complex	cellular_component	4	2	1020	11	15887	0.154294
GO:1990048	anterograde neuronal dense core vesicle transport	biological_process	12	2	1020	11	15887	0.154294
GO:0070330	aromatase activity	molecular_function	7	4	1020	33	15887	0.158978
GO:0030878	thyroid gland development	biological_process	7	5	1020	45	15887	0.160094
GO:0006953	acute-phase response	biological_process	8	5	1020	45	15887	0.160094
GO:0045880	positive regulation of smoothened signaling pathway	biological_process	9	7	1020	70	15887	0.161252
GO:0006817	phosphate ion transport	biological_process	9	3	1020	22	15887	0.164481
GO:0060077	inhibitory synapse	cellular_component	4	3	1020	22	15887	0.164481
GO:0043023	ribosomal large subunit binding	molecular_function	6	3	1020	22	15887	0.164481
GO:1902237	positive regulation of endoplasmic reticulum stress-induced intrinsic apoptotic signaling pathway	biological_process	9	3	1020	22	15887	0.164481
GO:0070122	isopeptidase activity	molecular_function	6	3	1020	22	15887	0.164481
GO:0035137	hindlimb morphogenesis	biological_process	7	3	1020	22	15887	0.164481
GO:2001241	positive regulation of extrinsic apoptotic signaling pathway in absence of ligand	biological_process	11	3	1020	22	15887	0.164481
GO:0005089	Rho guanyl-nucleotide exchange factor activity	molecular_function	9	8	1020	84	15887	0.170472
GO:0031307	integral component of mitochondrial outer membrane	cellular_component	8	5	1020	46	15887	0.170797
GO:0000030	mannosyltransferase activity	molecular_function	7	4	1020	34	15887	0.171644
GO:0031643	positive regulation of myelination	biological_process	7	4	1020	34	15887	0.171644
GO:0046328	regulation of JNK cascade	biological_process	12	4	1020	34	15887	0.171644
GO:0048646	anatomical structure formation involved in morphogenesis	biological_process	4	4	1020	34	15887	0.171644
GO:0034622	cellular protein-containing complex assembly	biological_process	7	4	1020	34	15887	0.171644
GO:0009253	peptidoglycan catabolic process	biological_process	9	2	1020	12	15887	0.17765
GO:0009744	response to sucrose	biological_process	8	2	1020	12	15887	0.17765
GO:0005849	mRNA cleavage factor complex	cellular_component	4	2	1020	12	15887	0.17765
GO:0035617	stress granule disassembly	biological_process	8	2	1020	12	15887	0.17765
GO:1901896	positive regulation of ATPase-coupled calcium transmembrane transporter activity	biological_process	9	2	1020	12	15887	0.17765
GO:1901165	positive regulation of trophoblast cell migration	biological_process	9	2	1020	12	15887	0.17765
GO:0044828	negative regulation by host of viral genome replication	biological_process	9	2	1020	12	15887	0.17765
GO:0090481	pyrimidine nucleotide-sugar transmembrane transport	biological_process	9	2	1020	12	15887	0.17765
GO:0071396	cellular response to lipid	biological_process	7	2	1020	12	15887	0.17765
GO:0008821	crossover junction endodeoxyribonuclease activity	molecular_function	10	2	1020	12	15887	0.17765
GO:0036124	histone H3-K9 trimethylation	biological_process	13	2	1020	12	15887	0.17765
GO:0015936	coenzyme A metabolic process	biological_process	7	2	1020	12	15887	0.17765
GO:0090277	positive regulation of peptide hormone secretion	biological_process	10	2	1020	12	15887	0.17765
GO:0072307	regulation of metanephric nephron tubule epithelial cell differentiation	biological_process	10	2	1020	12	15887	0.17765
GO:1990414	replication-born double-strand break repair via sister chromatid exchange	biological_process	11	2	1020	12	15887	0.17765
GO:0003158	endothelium development	biological_process	7	2	1020	12	15887	0.17765
GO:0034103	regulation of tissue remodeling	biological_process	6	2	1020	12	15887	0.17765
GO:0031064	negative regulation of histone deacetylation	biological_process	11	2	1020	12	15887	0.17765
GO:0015165	pyrimidine nucleotide-sugar transmembrane transporter activity	molecular_function	7	2	1020	12	15887	0.17765
GO:0097368	establishment of Sertoli cell barrier	biological_process	8	2	1020	12	15887	0.17765
GO:0035873	lactate transmembrane transport	biological_process	12	2	1020	12	15887	0.17765
GO:0070829	heterochromatin maintenance	biological_process	7	2	1020	12	15887	0.17765
GO:0004791	thioredoxin-disulfide reductase activity	molecular_function	7	2	1020	12	15887	0.17765
GO:0015129	lactate transmembrane transporter activity	molecular_function	8	2	1020	12	15887	0.17765
GO:0019031	viral envelope	cellular_component	5	2	1020	12	15887	0.17765
GO:0061518	microglial cell proliferation	biological_process	5	2	1020	12	15887	0.17765
GO:1903903	regulation of establishment of T cell polarity	biological_process	9	1	1020	3	15887	0.180519
GO:0061017	hepatoblast differentiation	biological_process	7	1	1020	3	15887	0.180519
GO:0046950	cellular ketone body metabolic process	biological_process	5	1	1020	3	15887	0.180519
GO:0042197	halogenated hydrocarbon metabolic process	biological_process	6	1	1020	3	15887	0.180519
GO:1905349	ciliary transition zone assembly	biological_process	6	1	1020	3	15887	0.180519
GO:0006178	guanine salvage	biological_process	12	1	1020	3	15887	0.180519
GO:0033787	cyanocobalamin reductase (cyanide-eliminating) activity	molecular_function	7	1	1020	3	15887	0.180519
GO:0072176	nephric duct development	biological_process	6	1	1020	3	15887	0.180519
GO:0018021	peptidyl-histidine methylation	biological_process	11	1	1020	3	15887	0.180519
GO:0046814	coreceptor-mediated virion attachment to host cell	biological_process	7	1	1020	3	15887	0.180519
GO:1902623	negative regulation of neutrophil migration	biological_process	8	1	1020	3	15887	0.180519
GO:0016104	triterpenoid biosynthetic process	biological_process	10	1	1020	3	15887	0.180519
GO:0002059	thymine binding	molecular_function	7	1	1020	3	15887	0.180519
GO:0004310	farnesyl-diphosphate farnesyltransferase activity	molecular_function	8	1	1020	3	15887	0.180519
GO:1904985	negative regulation of quinolinate biosynthetic process	biological_process	9	1	1020	3	15887	0.180519
GO:0039020	pronephric nephron tubule development	biological_process	8	1	1020	3	15887	0.180519
GO:0061656	SUMO conjugating enzyme activity	molecular_function	7	1	1020	3	15887	0.180519
GO:0090133	mesendoderm migration	biological_process	6	1	1020	3	15887	0.180519
GO:0015727	lactate transport	biological_process	11	1	1020	3	15887	0.180519
GO:0071919	G-quadruplex DNA formation	biological_process	8	1	1020	3	15887	0.180519
GO:0090010	transforming growth factor beta receptor signaling pathway involved in primitive streak formation	biological_process	9	1	1020	3	15887	0.180519
GO:0015791	polyol transport	biological_process	8	1	1020	3	15887	0.180519
GO:0032263	GMP salvage	biological_process	10	1	1020	3	15887	0.180519
GO:0042292	URM1 activating enzyme activity	molecular_function	7	1	1020	3	15887	0.180519
GO:0072240	metanephric DCT cell differentiation	biological_process	8	1	1020	3	15887	0.180519
GO:0032075	positive regulation of nuclease activity	biological_process	8	1	1020	3	15887	0.180519
GO:1903755	positive regulation of SUMO transferase activity	biological_process	12	1	1020	3	15887	0.180519
GO:0045685	regulation of glial cell differentiation	biological_process	10	1	1020	3	15887	0.180519
GO:0061534	gamma-aminobutyric acid secretion, neurotransmission	biological_process	7	1	1020	3	15887	0.180519
GO:0018208	peptidyl-proline modification	biological_process	10	1	1020	3	15887	0.180519
GO:0001760	aminocarboxymuconate-semialdehyde decarboxylase activity	molecular_function	7	1	1020	3	15887	0.180519
GO:0044839	cell cycle G2/M phase transition	biological_process	6	1	1020	3	15887	0.180519
GO:1902225	negative regulation of acrosome reaction	biological_process	8	1	1020	3	15887	0.180519
GO:0060072	large conductance calcium-activated potassium channel activity	molecular_function	10	1	1020	3	15887	0.180519
GO:0032990	cell part morphogenesis	biological_process	6	1	1020	3	15887	0.180519
GO:0097017	renal protein absorption	biological_process	7	1	1020	3	15887	0.180519
GO:2000984	negative regulation of ATP citrate synthase activity	biological_process	8	1	1020	3	15887	0.180519
GO:0071869	response to catecholamine	biological_process	7	1	1020	3	15887	0.180519
GO:0004420	hydroxymethylglutaryl-CoA reductase (NADPH) activity	molecular_function	7	1	1020	3	15887	0.180519
GO:1905226	regulation of adhesion of symbiont to host epithelial cell	biological_process	7	1	1020	3	15887	0.180519
GO:1902683	regulation of receptor localization to synapse	biological_process	8	1	1020	3	15887	0.180519
GO:0031422	RecQ family helicase-topoisomerase III complex	cellular_component	4	1	1020	3	15887	0.180519
GO:0090246	convergent extension involved in somitogenesis	biological_process	7	1	1020	3	15887	0.180519
GO:0060611	mammary gland fat development	biological_process	8	1	1020	3	15887	0.180519
GO:0042282	hydroxymethylglutaryl-CoA reductase activity	molecular_function	7	1	1020	3	15887	0.180519
GO:2000763	positive regulation of transcription from RNA polymerase II promoter involved in norepinephrine biosynthetic process	biological_process	11	1	1020	3	15887	0.180519
GO:0047975	guanosine phosphorylase activity	molecular_function	7	1	1020	3	15887	0.180519
GO:0071020	post-spliceosomal complex	cellular_component	7	1	1020	3	15887	0.180519
GO:0036146	cellular response to mycotoxin	biological_process	7	1	1020	3	15887	0.180519
GO:0044278	cell wall disruption in other organism	biological_process	6	1	1020	3	15887	0.180519
GO:1900542	regulation of purine nucleotide metabolic process	biological_process	9	1	1020	3	15887	0.180519
GO:0018192	enzyme active site formation via cysteine modification to L-cysteine persulfide	biological_process	10	1	1020	3	15887	0.180519
GO:2000516	positive regulation of CD4-positive, alpha-beta T cell activation	biological_process	11	1	1020	3	15887	0.180519
GO:1903634	negative regulation of leucine-tRNA ligase activity	biological_process	9	1	1020	3	15887	0.180519
GO:1901585	regulation of acid-sensing ion channel activity	biological_process	9	1	1020	3	15887	0.180519
GO:2000080	negative regulation of canonical Wnt signaling pathway involved in controlling type B pancreatic cell proliferation	biological_process	8	1	1020	3	15887	0.180519
GO:0061535	glutamate secretion, neurotransmission	biological_process	7	1	1020	3	15887	0.180519
GO:2000208	positive regulation of ribosomal small subunit export from nucleus	biological_process	12	1	1020	3	15887	0.180519
GO:0042840	D-glucuronate catabolic process	biological_process	10	1	1020	3	15887	0.180519
GO:0060802	epiblast cell-extraembryonic ectoderm cell signaling involved in anterior/posterior axis specification	biological_process	6	1	1020	3	15887	0.180519
GO:0030977	taurine binding	molecular_function	7	1	1020	3	15887	0.180519
GO:0008260	3-oxoacid CoA-transferase activity	molecular_function	7	1	1020	3	15887	0.180519
GO:0106091	glial cell projection elongation	biological_process	7	1	1020	3	15887	0.180519
GO:0050080	malonyl-CoA decarboxylase activity	molecular_function	7	1	1020	3	15887	0.180519
GO:0051794	regulation of timing of catagen	biological_process	9	1	1020	3	15887	0.180519
GO:0006781	succinyl-CoA pathway	biological_process	9	1	1020	3	15887	0.180519
GO:0120012	intermembrane sphingolipid transfer	biological_process	7	1	1020	3	15887	0.180519
GO:0062076	acyl-CoA delta5-desaturase activity	molecular_function	8	1	1020	3	15887	0.180519
GO:0060460	left lung morphogenesis	biological_process	7	1	1020	3	15887	0.180519
GO:0070421	DNA ligase III-XRCC1 complex	cellular_component	4	1	1020	3	15887	0.180519
GO:0043430	2-decaprenyl-6-methoxy-1,4-benzoquinone methyltransferase activity	molecular_function	10	1	1020	3	15887	0.180519
GO:0033505	floor plate morphogenesis	biological_process	6	1	1020	3	15887	0.180519
GO:0061144	alveolar secondary septum development	biological_process	8	1	1020	3	15887	0.180519
GO:0031943	regulation of glucocorticoid metabolic process	biological_process	9	1	1020	3	15887	0.180519
GO:0002113	interleukin-33 binding	molecular_function	6	1	1020	3	15887	0.180519
GO:0033127	regulation of histone phosphorylation	biological_process	10	1	1020	3	15887	0.180519
GO:0070557	PCNA-p21 complex	cellular_component	4	1	1020	3	15887	0.180519
GO:0046588	negative regulation of calcium-dependent cell-cell adhesion	biological_process	8	1	1020	3	15887	0.180519
GO:1903676	positive regulation of cap-dependent translational initiation	biological_process	13	1	1020	3	15887	0.180519
GO:0045338	farnesyl diphosphate metabolic process	biological_process	8	1	1020	3	15887	0.180519
GO:0035907	dorsal aorta development	biological_process	8	1	1020	3	15887	0.180519
GO:0031766	type 3 galanin receptor binding	molecular_function	9	1	1020	3	15887	0.180519
GO:0043417	negative regulation of skeletal muscle tissue regeneration	biological_process	8	1	1020	3	15887	0.180519
GO:1905012	regulation of 'de novo' NAD biosynthetic process from tryptophan	biological_process	10	1	1020	3	15887	0.180519
GO:0018910	benzene metabolic process	biological_process	7	1	1020	3	15887	0.180519
GO:0070853	myosin VI binding	molecular_function	7	1	1020	3	15887	0.180519
GO:0047941	glucuronolactone reductase activity	molecular_function	7	1	1020	3	15887	0.180519
GO:0034263	positive regulation of autophagy in response to ER overload	biological_process	7	1	1020	3	15887	0.180519
GO:0060904	regulation of protein folding in endoplasmic reticulum	biological_process	7	1	1020	3	15887	0.180519
GO:2000793	cell proliferation involved in heart valve development	biological_process	4	1	1020	3	15887	0.180519
GO:0035606	peptidyl-cysteine S-trans-nitrosylation	biological_process	11	1	1020	3	15887	0.180519
GO:0032876	negative regulation of DNA endoreduplication	biological_process	9	1	1020	3	15887	0.180519
GO:0102797	geranial:oxygen oxidoreductase activity	molecular_function	7	1	1020	3	15887	0.180519
GO:1903909	regulation of receptor clustering	biological_process	9	1	1020	3	15887	0.180519
GO:0010743	regulation of macrophage derived foam cell differentiation	biological_process	7	1	1020	3	15887	0.180519
GO:0048792	spontaneous exocytosis of neurotransmitter	biological_process	7	1	1020	3	15887	0.180519
GO:0033037	polysaccharide localization	biological_process	5	1	1020	3	15887	0.180519
GO:0042748	circadian sleep/wake cycle, non-REM sleep	biological_process	7	1	1020	3	15887	0.180519
GO:0071387	cellular response to cortisol stimulus	biological_process	7	1	1020	3	15887	0.180519
GO:1903587	regulation of blood vessel endothelial cell proliferation involved in sprouting angiogenesis	biological_process	9	1	1020	3	15887	0.180519
GO:1990730	VCP-NSFL1C complex	cellular_component	4	1	1020	3	15887	0.180519
GO:0072721	cellular response to dithiothreitol	biological_process	7	1	1020	3	15887	0.180519
GO:0052741	(R)-limonene 6-monooxygenase activity	molecular_function	8	1	1020	3	15887	0.180519
GO:0044345	stromal-epithelial cell signaling involved in prostate gland development	biological_process	6	1	1020	3	15887	0.180519
GO:2001253	regulation of histone H3-K36 trimethylation	biological_process	12	1	1020	3	15887	0.180519
GO:0033860	regulation of NAD(P)H oxidase activity	biological_process	7	1	1020	3	15887	0.180519
GO:0044795	trans-Golgi network to recycling endosome transport	biological_process	8	1	1020	3	15887	0.180519
GO:0031058	positive regulation of histone modification	biological_process	10	1	1020	3	15887	0.180519
GO:0072389	flavin adenine dinucleotide catabolic process	biological_process	8	1	1020	3	15887	0.180519
GO:2000612	regulation of thyroid-stimulating hormone secretion	biological_process	10	1	1020	3	15887	0.180519
GO:0098597	observational learning	biological_process	6	1	1020	3	15887	0.180519
GO:0031765	type 2 galanin receptor binding	molecular_function	9	1	1020	3	15887	0.180519
GO:1905242	response to 3,3',5-triiodo-L-thyronine	biological_process	7	1	1020	3	15887	0.180519
GO:1902256	regulation of apoptotic process involved in outflow tract morphogenesis	biological_process	8	1	1020	3	15887	0.180519
GO:1903629	positive regulation of dUTP diphosphatase activity	biological_process	8	1	1020	3	15887	0.180519
GO:0070413	trehalose metabolism in response to stress	biological_process	9	1	1020	3	15887	0.180519
GO:0061605	molybdopterin-synthase adenylyltransferase activity	molecular_function	8	1	1020	3	15887	0.180519
GO:1900102	negative regulation of endoplasmic reticulum unfolded protein response	biological_process	9	1	1020	3	15887	0.180519
GO:0000120	RNA polymerase I transcription factor complex	cellular_component	7	1	1020	3	15887	0.180519
GO:1903891	regulation of ATF6-mediated unfolded protein response	biological_process	9	1	1020	3	15887	0.180519
GO:1904949	ATPase complex	cellular_component	5	1	1020	3	15887	0.180519
GO:2000176	positive regulation of pro-T cell differentiation	biological_process	11	1	1020	3	15887	0.180519
GO:0006713	glucocorticoid catabolic process	biological_process	8	1	1020	3	15887	0.180519
GO:0036363	transforming growth factor beta activation	biological_process	4	1	1020	3	15887	0.180519
GO:0031764	type 1 galanin receptor binding	molecular_function	9	1	1020	3	15887	0.180519
GO:0035565	regulation of pronephros size	biological_process	7	1	1020	3	15887	0.180519
GO:0071701	regulation of MAPK export from nucleus	biological_process	10	1	1020	3	15887	0.180519
GO:0072227	metanephric macula densa development	biological_process	10	1	1020	3	15887	0.180519
GO:0070981	L-asparagine biosynthetic process	biological_process	13	1	1020	3	15887	0.180519
GO:2001021	negative regulation of response to DNA damage stimulus	biological_process	7	1	1020	3	15887	0.180519
GO:0047685	amine sulfotransferase activity	molecular_function	7	1	1020	3	15887	0.180519
GO:0003984	acetolactate synthase activity	molecular_function	6	1	1020	3	15887	0.180519
GO:0090132	epithelium migration	biological_process	5	1	1020	3	15887	0.180519
GO:0047939	L-glucuronate reductase activity	molecular_function	7	1	1020	3	15887	0.180519
GO:0061296	negative regulation of mesenchymal cell apoptotic process involved in mesonephric nephron morphogenesis	biological_process	10	1	1020	3	15887	0.180519
GO:0061141	lung ciliated cell differentiation	biological_process	8	1	1020	3	15887	0.180519
GO:0016530	metallochaperone activity	molecular_function	4	1	1020	3	15887	0.180519
GO:0015801	aromatic amino acid transport	biological_process	11	1	1020	3	15887	0.180519
GO:2000761	positive regulation of N-terminal peptidyl-lysine acetylation	biological_process	10	1	1020	3	15887	0.180519
GO:0051747	cytosine C-5 DNA demethylase activity	molecular_function	5	1	1020	3	15887	0.180519
GO:2000723	negative regulation of cardiac vascular smooth muscle cell differentiation	biological_process	11	1	1020	3	15887	0.180519
GO:0018601	4-nitrophenol 2-monooxygenase activity	molecular_function	7	1	1020	3	15887	0.180519
GO:0005948	acetolactate synthase complex	cellular_component	6	1	1020	3	15887	0.180519
GO:0031763	galanin receptor binding	molecular_function	8	1	1020	3	15887	0.180519
GO:2000011	regulation of adaxial/abaxial pattern formation	biological_process	7	1	1020	3	15887	0.180519
GO:1904456	negative regulation of neuronal action potential	biological_process	7	1	1020	3	15887	0.180519
GO:0018675	(S)-limonene 6-monooxygenase activity	molecular_function	8	1	1020	3	15887	0.180519
GO:0019912	cyclin-dependent protein kinase activating kinase activity	molecular_function	8	1	1020	3	15887	0.180519
GO:0042300	beta-amyrin synthase activity	molecular_function	7	1	1020	3	15887	0.180519
GO:1903906	regulation of plasma membrane raft polarization	biological_process	7	1	1020	3	15887	0.180519
GO:0097510	base-excision repair, AP site formation via deaminated base removal	biological_process	9	1	1020	3	15887	0.180519
GO:1904566	cellular response to 1-oleoyl-sn-glycerol 3-phosphate	biological_process	8	1	1020	3	15887	0.180519
GO:0000725	recombinational repair	biological_process	9	1	1020	3	15887	0.180519
GO:0090297	positive regulation of mitochondrial DNA replication	biological_process	12	1	1020	3	15887	0.180519
GO:0050124	N-acylneuraminate-9-phosphatase activity	molecular_function	8	1	1020	3	15887	0.180519
GO:0046380	N-acetylneuraminate biosynthetic process	biological_process	8	1	1020	3	15887	0.180519
GO:0046038	GMP catabolic process	biological_process	12	1	1020	3	15887	0.180519
GO:0035743	CD4-positive, alpha-beta T cell cytokine production	biological_process	7	1	1020	3	15887	0.180519
GO:1902691	respiratory basal cell differentiation	biological_process	7	1	1020	3	15887	0.180519
GO:0030504	inorganic diphosphate transmembrane transporter activity	molecular_function	8	1	1020	3	15887	0.180519
GO:0003878	ATP citrate synthase activity	molecular_function	7	1	1020	3	15887	0.180519
GO:0002336	B-1 B cell lineage commitment	biological_process	7	1	1020	3	15887	0.180519
GO:2000412	positive regulation of thymocyte migration	biological_process	10	1	1020	3	15887	0.180519
GO:0019081	viral translation	biological_process	7	1	1020	3	15887	0.180519
GO:0000250	lanosterol synthase activity	molecular_function	7	1	1020	3	15887	0.180519
GO:0048840	otolith development	biological_process	5	1	1020	3	15887	0.180519
GO:1903011	negative regulation of bone development	biological_process	7	1	1020	3	15887	0.180519
GO:1902228	positive regulation of macrophage colony-stimulating factor signaling pathway	biological_process	10	1	1020	3	15887	0.180519
GO:0002100	tRNA wobble adenosine to inosine editing	biological_process	14	1	1020	3	15887	0.180519
GO:0052657	guanine phosphoribosyltransferase activity	molecular_function	8	1	1020	3	15887	0.180519
GO:0046100	hypoxanthine metabolic process	biological_process	10	1	1020	3	15887	0.180519
GO:0060677	ureteric bud elongation	biological_process	6	1	1020	3	15887	0.180519
GO:0018676	(S)-limonene 7-monooxygenase activity	molecular_function	8	1	1020	3	15887	0.180519
GO:1901475	pyruvate transmembrane transport	biological_process	12	1	1020	3	15887	0.180519
GO:1904591	positive regulation of protein import	biological_process	8	1	1020	3	15887	0.180519
GO:1905314	semi-lunar valve development	biological_process	6	1	1020	3	15887	0.180519
GO:1903897	regulation of PERK-mediated unfolded protein response	biological_process	9	1	1020	3	15887	0.180519
GO:0042480	negative regulation of eye photoreceptor cell development	biological_process	12	1	1020	3	15887	0.180519
GO:2001294	malonyl-CoA catabolic process	biological_process	12	1	1020	3	15887	0.180519
GO:0007063	regulation of sister chromatid cohesion	biological_process	9	1	1020	3	15887	0.180519
GO:1903701	substantia propria of cornea development	biological_process	5	1	1020	3	15887	0.180519
GO:0052718	tRNA-specific adenosine-34 deaminase complex	cellular_component	5	1	1020	3	15887	0.180519
GO:0043333	2-octaprenyl-6-methoxy-1,4-benzoquinone methylase activity	molecular_function	10	1	1020	3	15887	0.180519
GO:0097501	stress response to metal ion	biological_process	5	1	1020	3	15887	0.180519
GO:1902367	negative regulation of Notch signaling pathway involved in somitogenesis	biological_process	10	1	1020	3	15887	0.180519
GO:0002071	glandular epithelial cell maturation	biological_process	8	1	1020	3	15887	0.180519
GO:0042660	positive regulation of cell fate specification	biological_process	9	1	1020	3	15887	0.180519
GO:1903007	positive regulation of Lys63-specific deubiquitinase activity	biological_process	8	1	1020	3	15887	0.180519
GO:1990046	stress-induced mitochondrial fusion	biological_process	8	1	1020	3	15887	0.180519
GO:0004341	gluconolactonase activity	molecular_function	7	1	1020	3	15887	0.180519
GO:2000802	positive regulation of endocardial cushion to mesenchymal transition involved in heart valve formation	biological_process	11	1	1020	3	15887	0.180519
GO:1904780	negative regulation of protein localization to centrosome	biological_process	7	1	1020	3	15887	0.180519
GO:0018960	4-nitrophenol metabolic process	biological_process	5	1	1020	3	15887	0.180519
GO:1990356	sumoylated E2 ligase complex	cellular_component	4	1	1020	3	15887	0.180519
GO:0048697	positive regulation of collateral sprouting in absence of injury	biological_process	9	1	1020	3	15887	0.180519
GO:2000509	negative regulation of dendritic cell chemotaxis	biological_process	9	1	1020	3	15887	0.180519
GO:0008123	cholesterol 7-alpha-monooxygenase activity	molecular_function	7	1	1020	3	15887	0.180519
GO:0008495	protoheme IX farnesyltransferase activity	molecular_function	8	1	1020	3	15887	0.180519
GO:0019860	uracil metabolic process	biological_process	10	1	1020	3	15887	0.180519
GO:2000054	negative regulation of Wnt signaling pathway involved in dorsal/ventral axis specification	biological_process	10	1	1020	3	15887	0.180519
GO:0043105	negative regulation of GTP cyclohydrolase I activity	biological_process	8	1	1020	3	15887	0.180519
GO:0060243	negative regulation of cell growth involved in contact inhibition	biological_process	8	1	1020	3	15887	0.180519
GO:0018885	carbon tetrachloride metabolic process	biological_process	5	1	1020	3	15887	0.180519
GO:0044092	negative regulation of molecular function	biological_process	5	1	1020	3	15887	0.180519
GO:0060829	negative regulation of canonical Wnt signaling pathway involved in neural plate anterior/posterior pattern formation	biological_process	7	1	1020	3	15887	0.180519
GO:0097621	monoamine oxidase activity	molecular_function	7	1	1020	3	15887	0.180519
GO:0014843	growth factor dependent regulation of skeletal muscle satellite cell proliferation	biological_process	9	1	1020	3	15887	0.180519
GO:0097305	response to alcohol	biological_process	6	1	1020	3	15887	0.180519
GO:0019748	secondary metabolic process	biological_process	4	1	1020	3	15887	0.180519
GO:0051641	cellular localization	biological_process	4	1	1020	3	15887	0.180519
GO:0060602	branch elongation of an epithelium	biological_process	7	1	1020	3	15887	0.180519
GO:0061604	molybdopterin-synthase sulfurtransferase activity	molecular_function	7	1	1020	3	15887	0.180519
GO:0052717	tRNA-specific adenosine-34 deaminase activity	molecular_function	9	1	1020	3	15887	0.180519
GO:0001532	interleukin-21 receptor activity	molecular_function	7	1	1020	3	15887	0.180519
GO:0033872	[heparan sulfate]-glucosamine 3-sulfotransferase 3 activity	molecular_function	8	1	1020	3	15887	0.180519
GO:0008903	hydroxypyruvate isomerase activity	molecular_function	7	1	1020	3	15887	0.180519
GO:0002625	regulation of T cell antigen processing and presentation	biological_process	7	1	1020	3	15887	0.180519
GO:0044549	GTP cyclohydrolase binding	molecular_function	6	1	1020	3	15887	0.180519
GO:0009191	ribonucleoside diphosphate catabolic process	biological_process	10	1	1020	3	15887	0.180519
GO:1905004	picolinic acid biosynthetic process	biological_process	7	1	1020	3	15887	0.180519
GO:0006045	N-acetylglucosamine biosynthetic process	biological_process	9	1	1020	3	15887	0.180519
GO:1903625	negative regulation of DNA catabolic process	biological_process	9	1	1020	3	15887	0.180519
GO:0008859	exoribonuclease II activity	molecular_function	9	1	1020	3	15887	0.180519
GO:0102798	heptaldehyde:oxygen oxidoreductase activity	molecular_function	7	1	1020	3	15887	0.180519
GO:1905143	eukaryotic translation initiation factor 2 complex assembly	biological_process	7	1	1020	3	15887	0.180519
GO:0035821	modulation of process of other organism	biological_process	5	1	1020	3	15887	0.180519
GO:2000764	positive regulation of semaphorin-plexin signaling pathway involved in outflow tract morphogenesis	biological_process	8	1	1020	3	15887	0.180519
GO:1902165	regulation of intrinsic apoptotic signaling pathway in response to DNA damage by p53 class mediator	biological_process	9	1	1020	3	15887	0.180519
GO:0051350	negative regulation of lyase activity	biological_process	7	1	1020	3	15887	0.180519
GO:0097474	retinal cone cell apoptotic process	biological_process	8	1	1020	3	15887	0.180519
GO:2000795	negative regulation of epithelial cell proliferation involved in lung morphogenesis	biological_process	9	1	1020	3	15887	0.180519
GO:0061032	visceral serous pericardium development	biological_process	5	1	1020	3	15887	0.180519
GO:0035971	peptidyl-histidine dephosphorylation	biological_process	10	1	1020	3	15887	0.180519
GO:0003363	lamellipodium assembly involved in ameboidal cell migration	biological_process	9	1	1020	3	15887	0.180519
GO:0045112	integrin biosynthetic process	biological_process	7	1	1020	3	15887	0.180519
GO:0003171	atrioventricular valve development	biological_process	6	1	1020	3	15887	0.180519
GO:0072538	T-helper 17 type immune response	biological_process	7	1	1020	3	15887	0.180519
GO:0033260	nuclear DNA replication	biological_process	11	1	1020	3	15887	0.180519
GO:0048034	heme O biosynthetic process	biological_process	10	1	1020	3	15887	0.180519
GO:0048327	axial mesodermal cell fate specification	biological_process	7	1	1020	3	15887	0.180519
GO:2000657	negative regulation of apolipoprotein binding	biological_process	8	1	1020	3	15887	0.180519
GO:0051649	establishment of localization in cell	biological_process	5	1	1020	3	15887	0.180519
GO:0097180	serine protease inhibitor complex	cellular_component	6	1	1020	3	15887	0.180519
GO:0051996	squalene synthase activity	molecular_function	8	1	1020	3	15887	0.180519
GO:0045485	omega-6 fatty acid desaturase activity	molecular_function	6	1	1020	3	15887	0.180519
GO:0002085	inhibition of neuroepithelial cell differentiation	biological_process	7	1	1020	3	15887	0.180519
GO:0140039	cell-cell adhesion in response to extracellular stimulus	biological_process	6	1	1020	3	15887	0.180519
GO:0010918	positive regulation of mitochondrial membrane potential	biological_process	7	3	1020	23	15887	0.180699
GO:0051168	nuclear export	biological_process	9	3	1020	23	15887	0.180699
GO:0003208	cardiac ventricle morphogenesis	biological_process	6	3	1020	23	15887	0.180699
GO:0098831	presynaptic active zone cytoplasmic component	cellular_component	4	3	1020	23	15887	0.180699
GO:0019079	viral genome replication	biological_process	7	3	1020	23	15887	0.180699
GO:0045295	gamma-catenin binding	molecular_function	5	3	1020	23	15887	0.180699
GO:0097284	hepatocyte apoptotic process	biological_process	8	3	1020	23	15887	0.180699
GO:0001894	tissue homeostasis	biological_process	7	5	1020	47	15887	0.181768
GO:0005614	interstitial matrix	cellular_component	6	3	1020	24	15887	0.197323
GO:0051549	positive regulation of keratinocyte migration	biological_process	10	3	1020	24	15887	0.197323
GO:0060993	kidney morphogenesis	biological_process	6	3	1020	24	15887	0.197323
GO:0090162	establishment of epithelial cell polarity	biological_process	6	3	1020	24	15887	0.197323
GO:0000124	SAGA complex	cellular_component	8	3	1020	24	15887	0.197323
GO:0017166	vinculin binding	molecular_function	6	3	1020	24	15887	0.197323
GO:0031996	thioesterase binding	molecular_function	6	3	1020	24	15887	0.197323
GO:0042834	peptidoglycan binding	molecular_function	6	3	1020	24	15887	0.197323
GO:0030057	desmosome	cellular_component	5	4	1020	36	15887	0.197953
GO:0072719	cellular response to cisplatin	biological_process	7	2	1020	13	15887	0.201495
GO:0072675	osteoclast fusion	biological_process	6	2	1020	13	15887	0.201495
GO:0006207	'de novo' pyrimidine nucleobase biosynthetic process	biological_process	11	2	1020	13	15887	0.201495
GO:0060687	regulation of branching involved in prostate gland morphogenesis	biological_process	8	2	1020	13	15887	0.201495
GO:0010793	regulation of mRNA export from nucleus	biological_process	8	2	1020	13	15887	0.201495
GO:0060009	Sertoli cell development	biological_process	7	2	1020	13	15887	0.201495
GO:0048793	pronephros development	biological_process	7	2	1020	13	15887	0.201495
GO:0016264	gap junction assembly	biological_process	8	2	1020	13	15887	0.201495
GO:0030323	respiratory tube development	biological_process	6	2	1020	13	15887	0.201495
GO:0042921	glucocorticoid receptor signaling pathway	biological_process	8	2	1020	13	15887	0.201495
GO:0048820	hair follicle maturation	biological_process	6	2	1020	13	15887	0.201495
GO:0016799	hydrolase activity, hydrolyzing N-glycosyl compounds	molecular_function	6	2	1020	13	15887	0.201495
GO:0044323	retinoic acid-responsive element binding	molecular_function	11	2	1020	13	15887	0.201495
GO:0033522	histone H2A ubiquitination	biological_process	13	2	1020	13	15887	0.201495
GO:0072164	mesonephric tubule development	biological_process	6	2	1020	13	15887	0.201495
GO:0051055	negative regulation of lipid biosynthetic process	biological_process	8	2	1020	13	15887	0.201495
GO:0006085	acetyl-CoA biosynthetic process	biological_process	9	2	1020	13	15887	0.201495
GO:0060291	long-term synaptic potentiation	biological_process	10	8	1020	88	15887	0.202999
GO:0005539	glycosaminoglycan binding	molecular_function	5	5	1020	49	15887	0.204449
GO:0017080	sodium channel regulator activity	molecular_function	5	5	1020	49	15887	0.204449
GO:0007156	homophilic cell adhesion via plasma membrane adhesion molecules	biological_process	7	17	1020	213	15887	0.208862
GO:0031143	pseudopodium	cellular_component	6	4	1020	37	15887	0.211541
GO:0070593	dendrite self-avoidance	biological_process	6	3	1020	25	15887	0.214296
GO:0016578	histone deubiquitination	biological_process	10	3	1020	25	15887	0.214296
GO:0002377	immunoglobulin production	biological_process	5	3	1020	25	15887	0.214296
GO:2000009	negative regulation of protein localization to cell surface	biological_process	7	3	1020	25	15887	0.214296
GO:0090091	positive regulation of extracellular matrix disassembly	biological_process	9	2	1020	14	15887	0.22567
GO:0050691	regulation of defense response to virus by host	biological_process	8	2	1020	14	15887	0.22567
GO:0045542	positive regulation of cholesterol biosynthetic process	biological_process	11	2	1020	14	15887	0.22567
GO:0051593	response to folic acid	biological_process	6	2	1020	14	15887	0.22567
GO:0060487	lung epithelial cell differentiation	biological_process	7	2	1020	14	15887	0.22567
GO:0070192	chromosome organization involved in meiotic cell cycle	biological_process	7	2	1020	14	15887	0.22567
GO:0060527	prostate epithelial cord arborization involved in prostate glandular acinus morphogenesis	biological_process	9	2	1020	14	15887	0.22567
GO:0010459	negative regulation of heart rate	biological_process	10	2	1020	14	15887	0.22567
GO:1903361	protein localization to basolateral plasma membrane	biological_process	8	2	1020	14	15887	0.22567
GO:0071312	cellular response to alkaloid	biological_process	8	2	1020	14	15887	0.22567
GO:0016926	protein desumoylation	biological_process	11	2	1020	14	15887	0.22567
GO:0051891	positive regulation of cardioblast differentiation	biological_process	9	2	1020	14	15887	0.22567
GO:0070728	leucine binding	molecular_function	8	2	1020	14	15887	0.22567
GO:0034773	histone H4-K20 trimethylation	biological_process	13	2	1020	14	15887	0.22567
GO:0048512	circadian behavior	biological_process	5	2	1020	14	15887	0.22567
GO:0150078	positive regulation of neuroinflammatory response	biological_process	10	2	1020	14	15887	0.22567
GO:0034316	negative regulation of Arp2/3 complex-mediated actin nucleation	biological_process	11	2	1020	14	15887	0.22567
GO:0035456	response to interferon-beta	biological_process	7	2	1020	14	15887	0.22567
GO:0047631	ADP-ribose diphosphatase activity	molecular_function	8	2	1020	14	15887	0.22567
GO:0031325	positive regulation of cellular metabolic process	biological_process	7	2	1020	14	15887	0.22567
GO:0043382	positive regulation of memory T cell differentiation	biological_process	8	2	1020	14	15887	0.22567
GO:0036462	TRAIL-activated apoptotic signaling pathway	biological_process	8	2	1020	14	15887	0.22567
GO:0010811	positive regulation of cell-substrate adhesion	biological_process	7	6	1020	64	15887	0.226936
GO:0051017	actin filament bundle assembly	biological_process	6	6	1020	64	15887	0.226936
GO:0061809	NAD+ nucleotidase, cyclic ADP-ribose generating	molecular_function	8	3	1020	26	15887	0.231561
GO:0050872	white fat cell differentiation	biological_process	7	3	1020	26	15887	0.231561
GO:0086004	regulation of cardiac muscle cell contraction	biological_process	11	3	1020	26	15887	0.231561
GO:0030673	axolemma	cellular_component	7	3	1020	26	15887	0.231561
GO:2000279	negative regulation of DNA biosynthetic process	biological_process	9	3	1020	26	15887	0.231561
GO:0050135	NAD(P)+ nucleosidase activity	molecular_function	7	3	1020	26	15887	0.231561
GO:2000594	positive regulation of metanephric DCT cell differentiation	biological_process	8	1	1020	4	15887	0.233143
GO:0035370	UBC13-UEV1A complex	cellular_component	6	1	1020	4	15887	0.233143
GO:0000009	alpha-1,6-mannosyltransferase activity	molecular_function	8	1	1020	4	15887	0.233143
GO:1902175	regulation of oxidative stress-induced intrinsic apoptotic signaling pathway	biological_process	8	1	1020	4	15887	0.233143
GO:0044339	canonical Wnt signaling pathway involved in osteoblast differentiation	biological_process	9	1	1020	4	15887	0.233143
GO:0035632	mitochondrial prohibitin complex	cellular_component	6	1	1020	4	15887	0.233143
GO:0098657	import into cell	biological_process	6	1	1020	4	15887	0.233143
GO:2000329	negative regulation of T-helper 17 cell lineage commitment	biological_process	9	1	1020	4	15887	0.233143
GO:0004157	dihydropyrimidinase activity	molecular_function	7	1	1020	4	15887	0.233143
GO:0048563	post-embryonic animal organ morphogenesis	biological_process	6	1	1020	4	15887	0.233143
GO:0021589	cerebellum structural organization	biological_process	5	1	1020	4	15887	0.233143
GO:1903225	negative regulation of endodermal cell differentiation	biological_process	8	1	1020	4	15887	0.233143
GO:0019085	early viral transcription	biological_process	8	1	1020	4	15887	0.233143
GO:0070861	regulation of protein exit from endoplasmic reticulum	biological_process	9	1	1020	4	15887	0.233143
GO:0060738	epithelial-mesenchymal signaling involved in prostate gland development	biological_process	4	1	1020	4	15887	0.233143
GO:1903929	primary palate development	biological_process	6	1	1020	4	15887	0.233143
GO:0051025	negative regulation of immunoglobulin secretion	biological_process	10	1	1020	4	15887	0.233143
GO:0097057	TRAF2-GSTP1 complex	cellular_component	4	1	1020	4	15887	0.233143
GO:0021551	central nervous system morphogenesis	biological_process	5	1	1020	4	15887	0.233143
GO:0007057	spindle assembly involved in female meiosis I	biological_process	6	1	1020	4	15887	0.233143
GO:0061547	glycogen synthase activity, transferring glucose-1-phosphate	molecular_function	6	1	1020	4	15887	0.233143
GO:0004373	glycogen (starch) synthase activity	molecular_function	8	1	1020	4	15887	0.233143
GO:0036461	BLOC-2 complex binding	molecular_function	5	1	1020	4	15887	0.233143
GO:0099508	voltage-gated ion channel activity involved in regulation of presynaptic membrane potential	molecular_function	10	1	1020	4	15887	0.233143
GO:0016866	intramolecular transferase activity	molecular_function	5	1	1020	4	15887	0.233143
GO:0034998	oligosaccharyltransferase I complex	cellular_component	8	1	1020	4	15887	0.233143
GO:0090298	negative regulation of mitochondrial DNA replication	biological_process	12	1	1020	4	15887	0.233143
GO:0098888	extrinsic component of presynaptic membrane	cellular_component	5	1	1020	4	15887	0.233143
GO:0003062	regulation of heart rate by chemical signal	biological_process	10	1	1020	4	15887	0.233143
GO:0009115	xanthine catabolic process	biological_process	11	1	1020	4	15887	0.233143
GO:0000350	generation of catalytic spliceosome for second transesterification step	biological_process	9	1	1020	4	15887	0.233143
GO:0032810	sterol response element binding	molecular_function	11	1	1020	4	15887	0.233143
GO:0009383	rRNA (cytosine-C5-)-methyltransferase activity	molecular_function	8	1	1020	4	15887	0.233143
GO:1900218	negative regulation of apoptotic process involved in metanephric nephron tubule development	biological_process	10	1	1020	4	15887	0.233143
GO:0051153	regulation of striated muscle cell differentiation	biological_process	8	1	1020	4	15887	0.233143
GO:0004367	glycerol-3-phosphate dehydrogenase [NAD+] activity	molecular_function	7	1	1020	4	15887	0.233143
GO:0004027	alcohol sulfotransferase activity	molecular_function	7	1	1020	4	15887	0.233143
GO:1905243	cellular response to 3,3',5-triiodo-L-thyronine	biological_process	8	1	1020	4	15887	0.233143
GO:0001781	neutrophil apoptotic process	biological_process	8	1	1020	4	15887	0.233143
GO:0036501	UFD1-NPL4 complex	cellular_component	4	1	1020	4	15887	0.233143
GO:0099012	neuronal dense core vesicle membrane	cellular_component	9	1	1020	4	15887	0.233143
GO:0032370	positive regulation of lipid transport	biological_process	8	1	1020	4	15887	0.233143
GO:2000635	negative regulation of primary miRNA processing	biological_process	10	1	1020	4	15887	0.233143
GO:0099557	trans-synaptic signaling by trans-synaptic complex, modulating synaptic transmission	biological_process	9	1	1020	4	15887	0.233143
GO:0072233	metanephric thick ascending limb development	biological_process	9	1	1020	4	15887	0.233143
GO:1990144	intrinsic apoptotic signaling pathway in response to hypoxia	biological_process	7	1	1020	4	15887	0.233143
GO:0071344	diphosphate metabolic process	biological_process	6	1	1020	4	15887	0.233143
GO:0004105	choline-phosphate cytidylyltransferase activity	molecular_function	8	1	1020	4	15887	0.233143
GO:0061944	negative regulation of protein K48-linked ubiquitination	biological_process	13	1	1020	4	15887	0.233143
GO:0048710	regulation of astrocyte differentiation	biological_process	11	1	1020	4	15887	0.233143
GO:0046168	glycerol-3-phosphate catabolic process	biological_process	9	1	1020	4	15887	0.233143
GO:0003195	tricuspid valve formation	biological_process	7	1	1020	4	15887	0.233143
GO:0007638	mechanosensory behavior	biological_process	4	1	1020	4	15887	0.233143
GO:0035718	macrophage migration inhibitory factor binding	molecular_function	6	1	1020	4	15887	0.233143
GO:0048534	hematopoietic or lymphoid organ development	biological_process	6	1	1020	4	15887	0.233143
GO:1905006	negative regulation of epithelial to mesenchymal transition involved in endocardial cushion formation	biological_process	10	1	1020	4	15887	0.233143
GO:1901894	regulation of ATPase-coupled calcium transmembrane transporter activity	biological_process	9	1	1020	4	15887	0.233143
GO:0019776	Atg8 ligase activity	molecular_function	5	1	1020	4	15887	0.233143
GO:0050925	negative regulation of negative chemotaxis	biological_process	9	1	1020	4	15887	0.233143
GO:0099642	retrograde axonal protein transport	biological_process	12	1	1020	4	15887	0.233143
GO:0044773	mitotic DNA damage checkpoint	biological_process	8	1	1020	4	15887	0.233143
GO:0099631	postsynaptic endocytic zone cytoplasmic component	cellular_component	4	1	1020	4	15887	0.233143
GO:0009890	negative regulation of biosynthetic process	biological_process	7	1	1020	4	15887	0.233143
GO:0030835	negative regulation of actin filament depolymerization	biological_process	9	1	1020	4	15887	0.233143
GO:0043308	eosinophil degranulation	biological_process	9	1	1020	4	15887	0.233143
GO:0060689	cell differentiation involved in salivary gland development	biological_process	6	1	1020	4	15887	0.233143
GO:0034669	integrin alpha4-beta7 complex	cellular_component	6	1	1020	4	15887	0.233143
GO:0004996	thyroid-stimulating hormone receptor activity	molecular_function	7	1	1020	4	15887	0.233143
GO:0003366	cell-matrix adhesion involved in ameboidal cell migration	biological_process	7	1	1020	4	15887	0.233143
GO:0000248	C-5 sterol desaturase activity	molecular_function	7	1	1020	4	15887	0.233143
GO:0004365	glyceraldehyde-3-phosphate dehydrogenase (NAD+) (phosphorylating) activity	molecular_function	8	1	1020	4	15887	0.233143
GO:0046943	carboxylic acid transmembrane transporter activity	molecular_function	6	1	1020	4	15887	0.233143
GO:0098840	protein transport along microtubule	biological_process	11	1	1020	4	15887	0.233143
GO:0098989	NMDA selective glutamate receptor signaling pathway	biological_process	8	1	1020	4	15887	0.233143
GO:0072181	mesonephric duct formation	biological_process	10	1	1020	4	15887	0.233143
GO:0046851	negative regulation of bone remodeling	biological_process	8	1	1020	4	15887	0.233143
GO:0090737	telomere maintenance via telomere trimming	biological_process	9	1	1020	4	15887	0.233143
GO:0031501	mannosyltransferase complex	cellular_component	5	1	1020	4	15887	0.233143
GO:0032625	interleukin-21 production	biological_process	5	1	1020	4	15887	0.233143
GO:0039003	pronephric field specification	biological_process	7	1	1020	4	15887	0.233143
GO:2000558	positive regulation of immunoglobulin production in mucosal tissue	biological_process	10	1	1020	4	15887	0.233143
GO:0002944	cyclin K-CDK12 complex	cellular_component	6	1	1020	4	15887	0.233143
GO:0008124	4-alpha-hydroxytetrahydrobiopterin dehydratase activity	molecular_function	7	1	1020	4	15887	0.233143
GO:0048878	chemical homeostasis	biological_process	6	1	1020	4	15887	0.233143
GO:1905039	carboxylic acid transmembrane transport	biological_process	10	1	1020	4	15887	0.233143
GO:0060370	susceptibility to T cell mediated cytotoxicity	biological_process	9	1	1020	4	15887	0.233143
GO:0022890	inorganic cation transmembrane transporter activity	molecular_function	7	1	1020	4	15887	0.233143
GO:0047946	glutamine N-acyltransferase activity	molecular_function	8	1	1020	4	15887	0.233143
GO:1900215	negative regulation of apoptotic process involved in metanephric collecting duct development	biological_process	10	1	1020	4	15887	0.233143
GO:0021842	chemorepulsion involved in interneuron migration from the subpallium to the cortex	biological_process	7	1	1020	4	15887	0.233143
GO:0044715	8-oxo-dGDP phosphatase activity	molecular_function	9	1	1020	4	15887	0.233143
GO:1901383	negative regulation of chorionic trophoblast cell proliferation	biological_process	8	1	1020	4	15887	0.233143
GO:0004854	xanthine dehydrogenase activity	molecular_function	7	1	1020	4	15887	0.233143
GO:0005094	Rho GDP-dissociation inhibitor activity	molecular_function	8	1	1020	4	15887	0.233143
GO:0044843	cell cycle G1/S phase transition	biological_process	6	1	1020	4	15887	0.233143
GO:0021816	extension of a leading process involved in cell motility in cerebral cortex radial glia guided migration	biological_process	9	1	1020	4	15887	0.233143
GO:0071963	establishment or maintenance of cell polarity regulating cell shape	biological_process	5	1	1020	4	15887	0.233143
GO:0000802	transverse filament	cellular_component	7	1	1020	4	15887	0.233143
GO:0033182	regulation of histone ubiquitination	biological_process	10	1	1020	4	15887	0.233143
GO:0038194	thyroid-stimulating hormone signaling pathway	biological_process	6	1	1020	4	15887	0.233143
GO:0002945	cyclin K-CDK13 complex	cellular_component	6	1	1020	4	15887	0.233143
GO:0019777	Atg12 transferase activity	molecular_function	6	1	1020	4	15887	0.233143
GO:0004910	interleukin-1, type II, blocking receptor activity	molecular_function	8	1	1020	4	15887	0.233143
GO:0006408	snRNA export from nucleus	biological_process	11	1	1020	4	15887	0.233143
GO:0015265	urea channel activity	molecular_function	7	1	1020	4	15887	0.233143
GO:1905030	voltage-gated ion channel activity involved in regulation of postsynaptic membrane potential	molecular_function	10	1	1020	4	15887	0.233143
GO:0001552	ovarian follicle atresia	biological_process	5	1	1020	4	15887	0.233143
GO:0072236	metanephric loop of Henle development	biological_process	9	1	1020	4	15887	0.233143
GO:0021759	globus pallidus development	biological_process	6	1	1020	4	15887	0.233143
GO:0072305	negative regulation of mesenchymal cell apoptotic process involved in metanephric nephron morphogenesis	biological_process	10	1	1020	4	15887	0.233143
GO:1904692	positive regulation of type B pancreatic cell proliferation	biological_process	9	1	1020	4	15887	0.233143
GO:0002384	hepatic immune response	biological_process	6	1	1020	4	15887	0.233143
GO:0036345	platelet maturation	biological_process	6	1	1020	4	15887	0.233143
GO:0042007	interleukin-18 binding	molecular_function	6	1	1020	4	15887	0.233143
GO:0008395	steroid hydroxylase activity	molecular_function	6	4	1020	39	15887	0.239442
GO:0002102	podosome	cellular_component	4	5	1020	52	15887	0.24007
GO:0036109	alpha-linolenic acid metabolic process	biological_process	11	3	1020	27	15887	0.249067
GO:0030195	negative regulation of blood coagulation	biological_process	8	3	1020	27	15887	0.249067
GO:0006636	unsaturated fatty acid biosynthetic process	biological_process	11	3	1020	27	15887	0.249067
GO:1902894	negative regulation of pri-miRNA transcription by RNA polymerase II	biological_process	11	3	1020	27	15887	0.249067
GO:0010828	positive regulation of glucose transmembrane transport	biological_process	9	2	1020	15	15887	0.250035
GO:0010764	negative regulation of fibroblast migration	biological_process	9	2	1020	15	15887	0.250035
GO:0048708	astrocyte differentiation	biological_process	7	2	1020	15	15887	0.250035
GO:0016600	flotillin complex	cellular_component	6	2	1020	15	15887	0.250035
GO:0009142	nucleoside triphosphate biosynthetic process	biological_process	9	2	1020	15	15887	0.250035
GO:0034351	negative regulation of glial cell apoptotic process	biological_process	10	2	1020	15	15887	0.250035
GO:0006384	transcription initiation from RNA polymerase III promoter	biological_process	9	2	1020	15	15887	0.250035
GO:0032432	actin filament bundle	cellular_component	6	2	1020	15	15887	0.250035
GO:0051024	positive regulation of immunoglobulin secretion	biological_process	10	2	1020	15	15887	0.250035
GO:0004983	neuropeptide Y receptor activity	molecular_function	8	2	1020	15	15887	0.250035
GO:0006072	glycerol-3-phosphate metabolic process	biological_process	8	2	1020	15	15887	0.250035
GO:0031442	positive regulation of mRNA 3'-end processing	biological_process	10	2	1020	15	15887	0.250035
GO:0060392	negative regulation of SMAD protein signal transduction	biological_process	10	2	1020	15	15887	0.250035
GO:0017121	plasma membrane phospholipid scrambling	biological_process	7	2	1020	15	15887	0.250035
GO:0004062	aryl sulfotransferase activity	molecular_function	7	2	1020	15	15887	0.250035
GO:0046833	positive regulation of RNA export from nucleus	biological_process	9	2	1020	15	15887	0.250035
GO:0060840	artery development	biological_process	6	2	1020	15	15887	0.250035
GO:1900027	regulation of ruffle assembly	biological_process	10	2	1020	15	15887	0.250035
GO:0032872	regulation of stress-activated MAPK cascade	biological_process	11	2	1020	15	15887	0.250035
GO:0006221	pyrimidine nucleotide biosynthetic process	biological_process	10	2	1020	15	15887	0.250035
GO:0000795	synaptonemal complex	cellular_component	8	5	1020	53	15887	0.252302
GO:0048168	regulation of neuronal synaptic plasticity	biological_process	10	4	1020	40	15887	0.253699
GO:0030512	negative regulation of transforming growth factor beta receptor signaling pathway	biological_process	10	10	1020	122	15887	0.257455
GO:0051287	NAD binding	molecular_function	6	6	1020	67	15887	0.259349
GO:0007492	endoderm development	biological_process	6	5	1020	54	15887	0.264684
GO:0003007	heart morphogenesis	biological_process	6	8	1020	95	15887	0.265087
GO:0006622	protein targeting to lysosome	biological_process	13	3	1020	28	15887	0.26676
GO:0034204	lipid translocation	biological_process	8	3	1020	28	15887	0.26676
GO:2000573	positive regulation of DNA biosynthetic process	biological_process	9	3	1020	28	15887	0.26676
GO:0060766	negative regulation of androgen receptor signaling pathway	biological_process	10	3	1020	28	15887	0.26676
GO:0055093	response to hyperoxia	biological_process	5	3	1020	28	15887	0.26676
GO:0010667	negative regulation of cardiac muscle cell apoptotic process	biological_process	12	4	1020	41	15887	0.268123
GO:0031204	posttranslational protein targeting to membrane, translocation	biological_process	12	2	1020	16	15887	0.274466
GO:0003015	heart process	biological_process	6	2	1020	16	15887	0.274466
GO:0005436	sodium:phosphate symporter activity	molecular_function	11	2	1020	16	15887	0.274466
GO:0048261	negative regulation of receptor-mediated endocytosis	biological_process	9	2	1020	16	15887	0.274466
GO:0003416	endochondral bone growth	biological_process	6	2	1020	16	15887	0.274466
GO:0030125	clathrin vesicle coat	cellular_component	8	2	1020	16	15887	0.274466
GO:0017108	5'-flap endonuclease activity	molecular_function	10	2	1020	16	15887	0.274466
GO:0019205	nucleobase-containing compound kinase activity	molecular_function	7	2	1020	16	15887	0.274466
GO:0030132	clathrin coat of coated pit	cellular_component	8	2	1020	16	15887	0.274466
GO:0051103	DNA ligation involved in DNA repair	biological_process	9	2	1020	16	15887	0.274466
GO:0099151	regulation of postsynaptic density assembly	biological_process	9	2	1020	16	15887	0.274466
GO:0042473	outer ear morphogenesis	biological_process	6	2	1020	16	15887	0.274466
GO:1902667	regulation of axon guidance	biological_process	10	2	1020	16	15887	0.274466
GO:0014009	glial cell proliferation	biological_process	4	2	1020	16	15887	0.274466
GO:0045008	depyrimidination	biological_process	9	2	1020	16	15887	0.274466
GO:2000767	positive regulation of cytoplasmic translation	biological_process	11	2	1020	16	15887	0.274466
GO:0060575	intestinal epithelial cell differentiation	biological_process	8	2	1020	16	15887	0.274466
GO:0032532	regulation of microvillus length	biological_process	10	2	1020	16	15887	0.274466
GO:0009950	dorsal/ventral axis specification	biological_process	6	2	1020	16	15887	0.274466
GO:0098982	GABA-ergic synapse	cellular_component	4	6	1020	69	15887	0.2816
GO:0033065	Rad51C-XRCC3 complex	cellular_component	5	1	1020	5	15887	0.28239
GO:0005368	taurine transmembrane transporter activity	molecular_function	7	1	1020	5	15887	0.28239
GO:0010721	negative regulation of cell development	biological_process	8	1	1020	5	15887	0.28239
GO:0036304	umbilical cord morphogenesis	biological_process	5	1	1020	5	15887	0.28239
GO:0097058	CRLF-CLCF1 complex	cellular_component	4	1	1020	5	15887	0.28239
GO:0022824	transmitter-gated ion channel activity	molecular_function	9	1	1020	5	15887	0.28239
GO:0000493	box H/ACA snoRNP assembly	biological_process	10	1	1020	5	15887	0.28239
GO:0033003	regulation of mast cell activation	biological_process	7	1	1020	5	15887	0.28239
GO:0018064	protein-histidine N-methyltransferase activity	molecular_function	8	1	1020	5	15887	0.28239
GO:0098690	glycinergic synapse	cellular_component	4	1	1020	5	15887	0.28239
GO:1903817	negative regulation of voltage-gated potassium channel activity	biological_process	9	1	1020	5	15887	0.28239
GO:0103073	anandamide amidohydrolase activity	molecular_function	7	1	1020	5	15887	0.28239
GO:0102077	oleamide hydrolase activity	molecular_function	7	1	1020	5	15887	0.28239
GO:0071663	positive regulation of granzyme B production	biological_process	9	1	1020	5	15887	0.28239
GO:0031281	positive regulation of cyclase activity	biological_process	7	1	1020	5	15887	0.28239
GO:0090239	regulation of histone H4 acetylation	biological_process	11	1	1020	5	15887	0.28239
GO:2000544	regulation of endothelial cell chemotaxis to fibroblast growth factor	biological_process	9	1	1020	5	15887	0.28239
GO:0004781	sulfate adenylyltransferase (ATP) activity	molecular_function	9	1	1020	5	15887	0.28239
GO:1902993	positive regulation of amyloid precursor protein catabolic process	biological_process	9	1	1020	5	15887	0.28239
GO:0042404	thyroid hormone catabolic process	biological_process	8	1	1020	5	15887	0.28239
GO:0090651	apical cytoplasm	cellular_component	6	1	1020	5	15887	0.28239
GO:0045841	negative regulation of mitotic metaphase/anaphase transition	biological_process	12	1	1020	5	15887	0.28239
GO:0071264	positive regulation of translational initiation in response to starvation	biological_process	13	1	1020	5	15887	0.28239
GO:0016557	peroxisome membrane biogenesis	biological_process	6	1	1020	5	15887	0.28239
GO:1902748	positive regulation of lens fiber cell differentiation	biological_process	9	1	1020	5	15887	0.28239
GO:0017004	cytochrome complex assembly	biological_process	8	1	1020	5	15887	0.28239
GO:2001295	malonyl-CoA biosynthetic process	biological_process	9	1	1020	5	15887	0.28239
GO:0045761	regulation of adenylate cyclase activity	biological_process	7	1	1020	5	15887	0.28239
GO:1990630	IRE1-RACK1-PP2A complex	cellular_component	4	1	1020	5	15887	0.28239
GO:2000791	negative regulation of mesenchymal cell proliferation involved in lung development	biological_process	7	1	1020	5	15887	0.28239
GO:0000797	condensin core heterodimer	cellular_component	4	1	1020	5	15887	0.28239
GO:0045163	clustering of voltage-gated potassium channels	biological_process	7	1	1020	5	15887	0.28239
GO:1905395	response to flavonoid	biological_process	6	1	1020	5	15887	0.28239
GO:0090657	telomeric loop disassembly	biological_process	9	1	1020	5	15887	0.28239
GO:0002842	positive regulation of T cell mediated immune response to tumor cell	biological_process	11	1	1020	5	15887	0.28239
GO:0021897	forebrain astrocyte development	biological_process	8	1	1020	5	15887	0.28239
GO:0009648	photoperiodism	biological_process	7	1	1020	5	15887	0.28239
GO:0070194	synaptonemal complex disassembly	biological_process	6	1	1020	5	15887	0.28239
GO:0042008	interleukin-18 receptor activity	molecular_function	7	1	1020	5	15887	0.28239
GO:0002114	interleukin-33 receptor activity	molecular_function	7	1	1020	5	15887	0.28239
GO:0003290	atrial septum secundum morphogenesis	biological_process	7	1	1020	5	15887	0.28239
GO:0001831	trophectodermal cellular morphogenesis	biological_process	8	1	1020	5	15887	0.28239
GO:0061364	apoptotic process involved in luteolysis	biological_process	5	1	1020	5	15887	0.28239
GO:0002282	microglial cell activation involved in immune response	biological_process	8	1	1020	5	15887	0.28239
GO:0031306	intrinsic component of mitochondrial outer membrane	cellular_component	7	1	1020	5	15887	0.28239
GO:0031871	proteinase activated receptor binding	molecular_function	7	1	1020	5	15887	0.28239
GO:0008900	potassium:proton exchanging ATPase activity	molecular_function	11	1	1020	5	15887	0.28239
GO:1901492	positive regulation of lymphangiogenesis	biological_process	8	1	1020	5	15887	0.28239
GO:0007060	male meiosis chromosome segregation	biological_process	5	1	1020	5	15887	0.28239
GO:0016509	long-chain-3-hydroxyacyl-CoA dehydrogenase activity	molecular_function	8	1	1020	5	15887	0.28239
GO:0008355	olfactory learning	biological_process	7	1	1020	5	15887	0.28239
GO:0001546	preantral ovarian follicle growth	biological_process	5	1	1020	5	15887	0.28239
GO:0090134	cell migration involved in mesendoderm migration	biological_process	9	1	1020	5	15887	0.28239
GO:1905179	negative regulation of cardiac muscle tissue regeneration	biological_process	8	1	1020	5	15887	0.28239
GO:0002058	uracil binding	molecular_function	7	1	1020	5	15887	0.28239
GO:0021722	superior olivary nucleus maturation	biological_process	6	1	1020	5	15887	0.28239
GO:0043178	alcohol binding	molecular_function	5	1	1020	5	15887	0.28239
GO:0031403	lithium ion binding	molecular_function	8	1	1020	5	15887	0.28239
GO:0045837	negative regulation of membrane potential	biological_process	6	1	1020	5	15887	0.28239
GO:1990889	H4K20me3 modified histone binding	molecular_function	7	1	1020	5	15887	0.28239
GO:0007039	protein catabolic process in the vacuole	biological_process	9	1	1020	5	15887	0.28239
GO:0042709	succinate-CoA ligase complex	cellular_component	5	1	1020	5	15887	0.28239
GO:0070069	cytochrome complex	cellular_component	4	1	1020	5	15887	0.28239
GO:1904562	phosphatidylinositol 5-phosphate metabolic process	biological_process	10	1	1020	5	15887	0.28239
GO:0006753	nucleoside phosphate metabolic process	biological_process	7	1	1020	5	15887	0.28239
GO:0003199	endocardial cushion to mesenchymal transition involved in heart valve formation	biological_process	10	1	1020	5	15887	0.28239
GO:0060168	positive regulation of adenosine receptor signaling pathway	biological_process	10	1	1020	5	15887	0.28239
GO:0004066	asparagine synthase (glutamine-hydrolyzing) activity	molecular_function	7	1	1020	5	15887	0.28239
GO:0031704	apelin receptor binding	molecular_function	8	1	1020	5	15887	0.28239
GO:0031345	negative regulation of cell projection organization	biological_process	8	1	1020	5	15887	0.28239
GO:0004909	interleukin-1, type I, activating receptor activity	molecular_function	8	1	1020	5	15887	0.28239
GO:0016933	extracellularly glycine-gated ion channel activity	molecular_function	10	1	1020	5	15887	0.28239
GO:1990120	messenger ribonucleoprotein complex assembly	biological_process	9	1	1020	5	15887	0.28239
GO:0033557	Slx1-Slx4 complex	cellular_component	4	1	1020	5	15887	0.28239
GO:0071691	cardiac muscle thin filament assembly	biological_process	7	1	1020	5	15887	0.28239
GO:0060733	regulation of eIF2 alpha phosphorylation by amino acid starvation	biological_process	10	1	1020	5	15887	0.28239
GO:0004311	farnesyltranstransferase activity	molecular_function	7	1	1020	5	15887	0.28239
GO:0006168	adenine salvage	biological_process	12	1	1020	5	15887	0.28239
GO:0006662	glycerol ether metabolic process	biological_process	6	1	1020	5	15887	0.28239
GO:0014034	neural crest cell fate commitment	biological_process	7	1	1020	5	15887	0.28239
GO:0004376	glycolipid mannosyltransferase activity	molecular_function	8	1	1020	5	15887	0.28239
GO:0046604	positive regulation of mitotic centrosome separation	biological_process	10	1	1020	5	15887	0.28239
GO:0032796	uropod organization	biological_process	7	1	1020	5	15887	0.28239
GO:0061857	endoplasmic reticulum stress-induced pre-emptive quality control	biological_process	7	1	1020	5	15887	0.28239
GO:0047134	protein-disulfide reductase activity	molecular_function	7	1	1020	5	15887	0.28239
GO:0000294	nuclear-transcribed mRNA catabolic process, endonucleolytic cleavage-dependent decay	biological_process	12	1	1020	5	15887	0.28239
GO:0001601	peptide YY receptor activity	molecular_function	9	1	1020	5	15887	0.28239
GO:0070096	mitochondrial outer membrane translocase complex assembly	biological_process	8	1	1020	5	15887	0.28239
GO:1904211	membrane protein proteolysis involved in retrograde protein transport, ER to cytosol	biological_process	9	1	1020	5	15887	0.28239
GO:0035710	CD4-positive, alpha-beta T cell activation	biological_process	9	1	1020	5	15887	0.28239
GO:0099186	structural constituent of postsynapse	molecular_function	5	1	1020	5	15887	0.28239
GO:0010085	polarity specification of proximal/distal axis	biological_process	6	1	1020	5	15887	0.28239
GO:0044830	modulation by host of viral RNA genome replication	biological_process	9	1	1020	5	15887	0.28239
GO:0004505	phenylalanine 4-monooxygenase activity	molecular_function	7	1	1020	5	15887	0.28239
GO:0035564	regulation of kidney size	biological_process	6	1	1020	5	15887	0.28239
GO:1902608	positive regulation of large conductance calcium-activated potassium channel activity	biological_process	9	1	1020	5	15887	0.28239
GO:0097050	type B pancreatic cell apoptotic process	biological_process	8	1	1020	5	15887	0.28239
GO:0019303	D-ribose catabolic process	biological_process	9	1	1020	5	15887	0.28239
GO:0051228	mitotic spindle disassembly	biological_process	10	1	1020	5	15887	0.28239
GO:0070453	regulation of heme biosynthetic process	biological_process	8	1	1020	5	15887	0.28239
GO:0003017	lymph circulation	biological_process	6	1	1020	5	15887	0.28239
GO:0032472	Golgi calcium ion transport	biological_process	11	1	1020	5	15887	0.28239
GO:0010734	negative regulation of protein glutathionylation	biological_process	10	1	1020	5	15887	0.28239
GO:0071596	ubiquitin-dependent protein catabolic process via the N-end rule pathway	biological_process	12	1	1020	5	15887	0.28239
GO:0046912	transferase activity, transferring acyl groups, acyl groups converted into alkyl on transfer	molecular_function	6	1	1020	5	15887	0.28239
GO:1904313	response to methamphetamine hydrochloride	biological_process	6	1	1020	5	15887	0.28239
GO:0070571	negative regulation of neuron projection regeneration	biological_process	12	1	1020	5	15887	0.28239
GO:0036492	eiF2alpha phosphorylation in response to endoplasmic reticulum stress	biological_process	11	1	1020	5	15887	0.28239
GO:0048232	male gamete generation	biological_process	6	1	1020	5	15887	0.28239
GO:1904956	regulation of midbrain dopaminergic neuron differentiation	biological_process	11	1	1020	5	15887	0.28239
GO:1904306	positive regulation of gastro-intestinal system smooth muscle contraction	biological_process	11	1	1020	5	15887	0.28239
GO:0021740	principal sensory nucleus of trigeminal nerve development	biological_process	7	1	1020	5	15887	0.28239
GO:0004422	hypoxanthine phosphoribosyltransferase activity	molecular_function	8	1	1020	5	15887	0.28239
GO:1903923	positive regulation of protein processing in phagocytic vesicle	biological_process	11	1	1020	5	15887	0.28239
GO:0060900	embryonic camera-type eye formation	biological_process	5	1	1020	5	15887	0.28239
GO:0090675	intermicrovillar adhesion	biological_process	4	1	1020	5	15887	0.28239
GO:0009304	tRNA transcription	biological_process	10	1	1020	5	15887	0.28239
GO:0005174	CD40 receptor binding	molecular_function	8	1	1020	5	15887	0.28239
GO:0050659	N-acetylgalactosamine 4-sulfate 6-O-sulfotransferase activity	molecular_function	7	1	1020	5	15887	0.28239
GO:1990682	CSF1-CSF1R complex	cellular_component	4	1	1020	5	15887	0.28239
GO:0046083	adenine metabolic process	biological_process	10	1	1020	5	15887	0.28239
GO:0120017	ceramide transfer activity	molecular_function	7	1	1020	5	15887	0.28239
GO:0033142	progesterone receptor binding	molecular_function	9	1	1020	5	15887	0.28239
GO:0098599	palmitoyl hydrolase activity	molecular_function	5	1	1020	5	15887	0.28239
GO:0008309	double-stranded DNA exodeoxyribonuclease activity	molecular_function	10	1	1020	5	15887	0.28239
GO:0032429	regulation of phospholipase A2 activity	biological_process	9	1	1020	5	15887	0.28239
GO:0051126	negative regulation of actin nucleation	biological_process	10	1	1020	5	15887	0.28239
GO:0043489	RNA stabilization	biological_process	10	1	1020	5	15887	0.28239
GO:0007509	mesoderm migration involved in gastrulation	biological_process	9	1	1020	5	15887	0.28239
GO:0006116	NADH oxidation	biological_process	5	1	1020	5	15887	0.28239
GO:0005275	amine transmembrane transporter activity	molecular_function	5	1	1020	5	15887	0.28239
GO:0045726	positive regulation of integrin biosynthetic process	biological_process	9	1	1020	5	15887	0.28239
GO:0048211	Golgi vesicle docking	biological_process	7	1	1020	5	15887	0.28239
GO:1905322	positive regulation of mesenchymal stem cell migration	biological_process	9	1	1020	5	15887	0.28239
GO:0098930	axonal transport	biological_process	10	1	1020	5	15887	0.28239
GO:0014891	striated muscle atrophy	biological_process	8	1	1020	5	15887	0.28239
GO:0042704	uterine wall breakdown	biological_process	5	1	1020	5	15887	0.28239
GO:0043331	response to dsRNA	biological_process	7	1	1020	5	15887	0.28239
GO:0043368	positive T cell selection	biological_process	5	1	1020	5	15887	0.28239
GO:0140090	membrane curvature sensor activity	molecular_function	5	1	1020	5	15887	0.28239
GO:0035608	protein deglutamylation	biological_process	11	1	1020	5	15887	0.28239
GO:0016222	procollagen-proline 4-dioxygenase complex	cellular_component	7	1	1020	5	15887	0.28239
GO:0060633	negative regulation of transcription initiation from RNA polymerase II promoter	biological_process	11	1	1020	5	15887	0.28239
GO:0062029	positive regulation of stress granule assembly	biological_process	8	1	1020	5	15887	0.28239
GO:0061325	cell proliferation involved in outflow tract morphogenesis	biological_process	5	1	1020	5	15887	0.28239
GO:0015166	polyol transmembrane transporter activity	molecular_function	7	1	1020	5	15887	0.28239
GO:0006529	asparagine biosynthetic process	biological_process	12	1	1020	5	15887	0.28239
GO:0030505	inorganic diphosphate transport	biological_process	9	1	1020	5	15887	0.28239
GO:0097533	cellular stress response to acid chemical	biological_process	7	1	1020	5	15887	0.28239
GO:0071148	TEAD-1-YAP complex	cellular_component	7	1	1020	5	15887	0.28239
GO:0034651	cortisol biosynthetic process	biological_process	9	1	1020	5	15887	0.28239
GO:0035800	deubiquitinase activator activity	molecular_function	7	1	1020	5	15887	0.28239
GO:0004615	phosphomannomutase activity	molecular_function	7	1	1020	5	15887	0.28239
GO:0071819	DUBm complex	cellular_component	4	1	1020	5	15887	0.28239
GO:0004368	glycerol-3-phosphate dehydrogenase (quinone) activity	molecular_function	7	1	1020	5	15887	0.28239
GO:0017061	S-methyl-5-thioadenosine phosphorylase activity	molecular_function	8	1	1020	5	15887	0.28239
GO:0016031	tRNA import into mitochondrion	biological_process	11	1	1020	5	15887	0.28239
GO:0004967	glucagon receptor activity	molecular_function	7	1	1020	5	15887	0.28239
GO:2000041	negative regulation of planar cell polarity pathway involved in axis elongation	biological_process	8	1	1020	5	15887	0.28239
GO:0016531	copper chaperone activity	molecular_function	9	1	1020	5	15887	0.28239
GO:0060139	positive regulation of apoptotic process by virus	biological_process	9	1	1020	5	15887	0.28239
GO:0045917	positive regulation of complement activation	biological_process	8	1	1020	5	15887	0.28239
GO:0045161	neuronal ion channel clustering	biological_process	6	1	1020	5	15887	0.28239
GO:0006212	uracil catabolic process	biological_process	11	1	1020	5	15887	0.28239
GO:0006127	glycerophosphate shuttle	biological_process	6	1	1020	5	15887	0.28239
GO:0043103	hypoxanthine salvage	biological_process	12	1	1020	5	15887	0.28239
GO:0032994	protein-lipid complex	cellular_component	4	1	1020	5	15887	0.28239
GO:0010574	regulation of vascular endothelial growth factor production	biological_process	7	1	1020	5	15887	0.28239
GO:1904424	regulation of GTP binding	biological_process	6	1	1020	5	15887	0.28239
GO:1904022	positive regulation of G protein-coupled receptor internalization	biological_process	9	1	1020	5	15887	0.28239
GO:1904579	cellular response to thapsigargin	biological_process	8	1	1020	5	15887	0.28239
GO:0070535	histone H2A K63-linked ubiquitination	biological_process	14	1	1020	5	15887	0.28239
GO:0006921	cellular component disassembly involved in execution phase of apoptosis	biological_process	6	1	1020	5	15887	0.28239
GO:0060083	smooth muscle contraction involved in micturition	biological_process	10	1	1020	5	15887	0.28239
GO:0006743	ubiquinone metabolic process	biological_process	8	1	1020	5	15887	0.28239
GO:0071140	resolution of mitotic recombination intermediates	biological_process	9	1	1020	5	15887	0.28239
GO:2000276	negative regulation of oxidative phosphorylation uncoupler activity	biological_process	7	1	1020	5	15887	0.28239
GO:0005055	laminin receptor activity	molecular_function	5	1	1020	5	15887	0.28239
GO:0034714	type III transforming growth factor beta receptor binding	molecular_function	8	1	1020	5	15887	0.28239
GO:1900210	positive regulation of cardiolipin metabolic process	biological_process	10	1	1020	5	15887	0.28239
GO:0016362	activin receptor activity, type II	molecular_function	11	1	1020	5	15887	0.28239
GO:0002074	extraocular skeletal muscle development	biological_process	9	1	1020	5	15887	0.28239
GO:0019144	ADP-sugar diphosphatase activity	molecular_function	8	1	1020	5	15887	0.28239
GO:0044378	non-sequence-specific DNA binding, bending	molecular_function	8	1	1020	5	15887	0.28239
GO:0006208	pyrimidine nucleobase catabolic process	biological_process	10	1	1020	5	15887	0.28239
GO:1904431	positive regulation of t-circle formation	biological_process	11	1	1020	5	15887	0.28239
GO:0032014	positive regulation of ARF protein signal transduction	biological_process	12	1	1020	5	15887	0.28239
GO:0036245	cellular response to menadione	biological_process	7	1	1020	5	15887	0.28239
GO:0045213	neurotransmitter receptor metabolic process	biological_process	8	1	1020	5	15887	0.28239
GO:0003252	negative regulation of cell proliferation involved in heart valve morphogenesis	biological_process	9	1	1020	5	15887	0.28239
GO:2000074	regulation of type B pancreatic cell development	biological_process	8	1	1020	5	15887	0.28239
GO:0036303	lymph vessel morphogenesis	biological_process	5	1	1020	5	15887	0.28239
GO:0098890	extrinsic component of postsynaptic membrane	cellular_component	7	1	1020	5	15887	0.28239
GO:0004165	dodecenoyl-CoA delta-isomerase activity	molecular_function	7	1	1020	5	15887	0.28239
GO:0051499	D-aminoacyl-tRNA deacylase activity	molecular_function	8	1	1020	5	15887	0.28239
GO:0060073	micturition	biological_process	6	1	1020	5	15887	0.28239
GO:0006399	tRNA metabolic process	biological_process	10	1	1020	5	15887	0.28239
GO:0098958	retrograde axonal transport of mitochondrion	biological_process	12	1	1020	5	15887	0.28239
GO:0097059	CNTFR-CLCF1 complex	cellular_component	4	1	1020	5	15887	0.28239
GO:0004020	adenylylsulfate kinase activity	molecular_function	7	1	1020	5	15887	0.28239
GO:0045092	interleukin-18 receptor complex	cellular_component	6	1	1020	5	15887	0.28239
GO:0035526	retrograde transport, plasma membrane to Golgi	biological_process	7	1	1020	5	15887	0.28239
GO:0050976	detection of mechanical stimulus involved in sensory perception of touch	biological_process	7	1	1020	5	15887	0.28239
GO:0001069	regulatory region RNA binding	molecular_function	7	1	1020	5	15887	0.28239
GO:1900408	negative regulation of cellular response to oxidative stress	biological_process	7	1	1020	5	15887	0.28239
GO:0046185	aldehyde catabolic process	biological_process	6	1	1020	5	15887	0.28239
GO:0010256	endomembrane system organization	biological_process	5	1	1020	5	15887	0.28239
GO:1903006	positive regulation of protein K63-linked deubiquitination	biological_process	11	1	1020	5	15887	0.28239
GO:0031372	UBC13-MMS2 complex	cellular_component	6	1	1020	5	15887	0.28239
GO:0051500	D-tyrosyl-tRNA(Tyr) deacylase activity	molecular_function	9	1	1020	5	15887	0.28239
GO:1902679	negative regulation of RNA biosynthetic process	biological_process	9	1	1020	5	15887	0.28239
GO:0016863	intramolecular oxidoreductase activity, transposing C=C bonds	molecular_function	6	1	1020	5	15887	0.28239
GO:0036344	platelet morphogenesis	biological_process	8	1	1020	5	15887	0.28239
GO:2000158	positive regulation of ubiquitin-specific protease activity	biological_process	11	1	1020	5	15887	0.28239
GO:0032342	aldosterone biosynthetic process	biological_process	9	1	1020	5	15887	0.28239
GO:0004560	alpha-L-fucosidase activity	molecular_function	8	1	1020	5	15887	0.28239
GO:0103053	1-ethyladenine demethylase activity	molecular_function	7	1	1020	5	15887	0.28239
GO:0070460	thyroid-stimulating hormone secretion	biological_process	11	1	1020	5	15887	0.28239
GO:0047024	5alpha-androstane-3beta,17beta-diol dehydrogenase activity	molecular_function	7	1	1020	5	15887	0.28239
GO:0039520	induction by virus of host autophagy	biological_process	10	1	1020	5	15887	0.28239
GO:0098842	postsynaptic early endosome	cellular_component	9	1	1020	5	15887	0.28239
GO:0032468	Golgi calcium ion homeostasis	biological_process	12	1	1020	5	15887	0.28239
GO:0009583	detection of light stimulus	biological_process	7	1	1020	5	15887	0.28239
GO:1900224	positive regulation of nodal signaling pathway involved in determination of lateral mesoderm left/right asymmetry	biological_process	11	1	1020	5	15887	0.28239
GO:0033798	thyroxine 5-deiodinase activity	molecular_function	5	1	1020	5	15887	0.28239
GO:0071955	recycling endosome to Golgi transport	biological_process	9	1	1020	5	15887	0.28239
GO:0005280	amino acid:proton symporter activity	molecular_function	9	1	1020	5	15887	0.28239
GO:0045916	negative regulation of complement activation	biological_process	8	1	1020	5	15887	0.28239
GO:0097447	dendritic tree	cellular_component	6	1	1020	5	15887	0.28239
GO:0006784	heme A biosynthetic process	biological_process	10	1	1020	5	15887	0.28239
GO:0034518	RNA cap binding complex	cellular_component	4	1	1020	5	15887	0.28239
GO:0050698	proteoglycan sulfotransferase activity	molecular_function	7	1	1020	5	15887	0.28239
GO:0005006	epidermal growth factor-activated receptor activity	molecular_function	10	1	1020	5	15887	0.28239
GO:0070423	nucleotide-binding oligomerization domain containing signaling pathway	biological_process	9	4	1020	42	15887	0.282689
GO:0009792	embryo development ending in birth or egg hatching	biological_process	6	4	1020	42	15887	0.282689
GO:0045019	negative regulation of nitric oxide biosynthetic process	biological_process	9	3	1020	29	15887	0.284593
GO:0030970	retrograde protein transport, ER to cytosol	biological_process	12	3	1020	29	15887	0.284593
GO:0006268	DNA unwinding involved in DNA replication	biological_process	10	3	1020	29	15887	0.284593
GO:0005740	mitochondrial envelope	cellular_component	6	3	1020	29	15887	0.284593
GO:0030278	regulation of ossification	biological_process	6	3	1020	29	15887	0.284593
GO:0050832	defense response to fungus	biological_process	8	3	1020	29	15887	0.284593
GO:0030126	COPI vesicle coat	cellular_component	8	3	1020	29	15887	0.284593
GO:0007288	sperm axoneme assembly	biological_process	5	3	1020	29	15887	0.284593
GO:0071480	cellular response to gamma radiation	biological_process	8	5	1020	56	15887	0.289831
GO:0001726	ruffle	cellular_component	6	14	1020	184	15887	0.293962
GO:0045821	positive regulation of glycolytic process	biological_process	11	4	1020	43	15887	0.297369
GO:0061626	pharyngeal arch artery morphogenesis	biological_process	8	2	1020	17	15887	0.298855
GO:0006957	complement activation, alternative pathway	biological_process	6	2	1020	17	15887	0.298855
GO:0036435	K48-linked polyubiquitin modification-dependent protein binding	molecular_function	7	2	1020	17	15887	0.298855
GO:0004033	aldo-keto reductase (NADP) activity	molecular_function	7	2	1020	17	15887	0.298855
GO:0004169	dolichyl-phosphate-mannose-protein mannosyltransferase activity	molecular_function	8	2	1020	17	15887	0.298855
GO:0043297	apical junction assembly	biological_process	8	2	1020	17	15887	0.298855
GO:0070417	cellular response to cold	biological_process	6	2	1020	17	15887	0.298855
GO:0046903	secretion	biological_process	6	2	1020	17	15887	0.298855
GO:0008024	cyclin/CDK positive transcription elongation factor complex	cellular_component	5	2	1020	17	15887	0.298855
GO:0033327	Leydig cell differentiation	biological_process	5	2	1020	17	15887	0.298855
GO:0051597	response to methylmercury	biological_process	6	2	1020	17	15887	0.298855
GO:0036094	small molecule binding	molecular_function	4	2	1020	17	15887	0.298855
GO:0071493	cellular response to UV-B	biological_process	9	2	1020	17	15887	0.298855
GO:0031639	plasminogen activation	biological_process	10	2	1020	17	15887	0.298855
GO:0070292	N-acylphosphatidylethanolamine metabolic process	biological_process	7	2	1020	17	15887	0.298855
GO:0044804	autophagy of nucleus	biological_process	7	2	1020	17	15887	0.298855
GO:0019896	axonal transport of mitochondrion	biological_process	8	2	1020	17	15887	0.298855
GO:0008278	cohesin complex	cellular_component	4	2	1020	17	15887	0.298855
GO:0034703	cation channel complex	cellular_component	7	2	1020	17	15887	0.298855
GO:0032732	positive regulation of interleukin-1 production	biological_process	8	2	1020	17	15887	0.298855
GO:1903818	positive regulation of voltage-gated potassium channel activity	biological_process	9	2	1020	17	15887	0.298855
GO:0010954	positive regulation of protein processing	biological_process	10	3	1020	30	15887	0.302518
GO:0008053	mitochondrial fusion	biological_process	7	3	1020	30	15887	0.302518
GO:0048485	sympathetic nervous system development	biological_process	6	3	1020	30	15887	0.302518
GO:0000800	lateral element	cellular_component	7	3	1020	30	15887	0.302518
GO:0008320	protein transmembrane transporter activity	molecular_function	6	3	1020	30	15887	0.302518
GO:0009948	anterior/posterior axis specification	biological_process	6	3	1020	30	15887	0.302518
GO:0043651	linoleic acid metabolic process	biological_process	11	3	1020	30	15887	0.302518
GO:1903351	cellular response to dopamine	biological_process	7	3	1020	30	15887	0.302518
GO:1901998	toxin transport	biological_process	6	7	1020	85	15887	0.304078
GO:0032733	positive regulation of interleukin-10 production	biological_process	8	6	1020	71	15887	0.304255
GO:0017144	drug metabolic process	biological_process	5	4	1020	44	15887	0.312139
GO:0017075	syntaxin-1 binding	molecular_function	7	4	1020	44	15887	0.312139
GO:0030374	nuclear receptor transcription coactivator activity	molecular_function	6	8	1020	100	15887	0.312429
GO:1902042	negative regulation of extrinsic apoptotic signaling pathway via death domain receptors	biological_process	11	6	1020	72	15887	0.315703
GO:0042054	histone methyltransferase activity	molecular_function	8	3	1020	31	15887	0.320491
GO:0003184	pulmonary valve morphogenesis	biological_process	6	3	1020	31	15887	0.320491
GO:0007250	activation of NF-kappaB-inducing kinase activity	biological_process	13	3	1020	31	15887	0.320491
GO:0032012	regulation of ARF protein signal transduction	biological_process	11	3	1020	31	15887	0.320491
GO:0035529	NADH pyrophosphatase activity	molecular_function	9	2	1020	18	15887	0.323105
GO:0072711	cellular response to hydroxyurea	biological_process	7	2	1020	18	15887	0.323105
GO:0003906	DNA-(apurinic or apyrimidinic site) endonuclease activity	molecular_function	5	2	1020	18	15887	0.323105
GO:0090197	positive regulation of chemokine secretion	biological_process	9	2	1020	18	15887	0.323105
GO:0034705	potassium channel complex	cellular_component	8	2	1020	18	15887	0.323105
GO:0030641	regulation of cellular pH	biological_process	11	2	1020	18	15887	0.323105
GO:1902260	negative regulation of delayed rectifier potassium channel activity	biological_process	10	2	1020	18	15887	0.323105
GO:0051983	regulation of chromosome segregation	biological_process	6	2	1020	18	15887	0.323105
GO:0003300	cardiac muscle hypertrophy	biological_process	8	2	1020	18	15887	0.323105
GO:0090382	phagosome maturation	biological_process	6	2	1020	18	15887	0.323105
GO:0061179	negative regulation of insulin secretion involved in cellular response to glucose stimulus	biological_process	12	2	1020	18	15887	0.323105
GO:0006198	cAMP catabolic process	biological_process	12	2	1020	18	15887	0.323105
GO:0060174	limb bud formation	biological_process	5	2	1020	18	15887	0.323105
GO:0039694	viral RNA genome replication	biological_process	8	2	1020	18	15887	0.323105
GO:0009629	response to gravity	biological_process	5	2	1020	18	15887	0.323105
GO:0042753	positive regulation of circadian rhythm	biological_process	6	2	1020	18	15887	0.323105
GO:0005916	fascia adherens	cellular_component	6	2	1020	18	15887	0.323105
GO:0033523	histone H2B ubiquitination	biological_process	13	2	1020	18	15887	0.323105
GO:2000177	regulation of neural precursor cell proliferation	biological_process	7	2	1020	18	15887	0.323105
GO:0071236	cellular response to antibiotic	biological_process	6	2	1020	18	15887	0.323105
GO:0032964	collagen biosynthetic process	biological_process	5	2	1020	18	15887	0.323105
GO:0008392	arachidonic acid epoxygenase activity	molecular_function	7	2	1020	18	15887	0.323105
GO:0036128	CatSper complex	cellular_component	10	2	1020	18	15887	0.323105
GO:0036513	Derlin-1 retrotranslocation complex	cellular_component	7	2	1020	18	15887	0.323105
GO:2000271	positive regulation of fibroblast apoptotic process	biological_process	10	2	1020	18	15887	0.323105
GO:0004875	complement receptor activity	molecular_function	6	2	1020	18	15887	0.323105
GO:0035313	wound healing, spreading of epidermal cells	biological_process	8	2	1020	18	15887	0.323105
GO:0071225	cellular response to muramyl dipeptide	biological_process	7	2	1020	18	15887	0.323105
GO:0035067	negative regulation of histone acetylation	biological_process	11	2	1020	18	15887	0.323105
GO:0019902	phosphatase binding	molecular_function	6	7	1020	87	15887	0.32499
GO:0015949	nucleobase-containing small molecule interconversion	biological_process	8	4	1020	45	15887	0.326972
GO:0071353	cellular response to interleukin-4	biological_process	8	4	1020	45	15887	0.326972
GO:0035023	regulation of Rho protein signal transduction	biological_process	11	4	1020	45	15887	0.326972
GO:0032743	positive regulation of interleukin-2 production	biological_process	8	5	1020	59	15887	0.328258
GO:0007163	establishment or maintenance of cell polarity	biological_process	4	5	1020	59	15887	0.328258
GO:0048858	cell projection morphogenesis	biological_process	6	1	1020	6	15887	0.328478
GO:0060672	epithelial cell morphogenesis involved in placental branching	biological_process	5	1	1020	6	15887	0.328478
GO:0009331	glycerol-3-phosphate dehydrogenase complex	cellular_component	6	1	1020	6	15887	0.328478
GO:0072289	metanephric nephron tubule formation	biological_process	9	1	1020	6	15887	0.328478
GO:0006273	lagging strand elongation	biological_process	10	1	1020	6	15887	0.328478
GO:1901318	negative regulation of flagellated sperm motility	biological_process	8	1	1020	6	15887	0.328478
GO:1902856	negative regulation of non-motile cilium assembly	biological_process	11	1	1020	6	15887	0.328478
GO:1901877	negative regulation of calcium ion binding	biological_process	7	1	1020	6	15887	0.328478
GO:0051799	negative regulation of hair follicle development	biological_process	8	1	1020	6	15887	0.328478
GO:0019783	ubiquitin-like protein-specific protease activity	molecular_function	8	1	1020	6	15887	0.328478
GO:0071461	cellular response to redox state	biological_process	5	1	1020	6	15887	0.328478
GO:0009786	regulation of asymmetric cell division	biological_process	7	1	1020	6	15887	0.328478
GO:0070985	transcription factor TFIIK complex	cellular_component	7	1	1020	6	15887	0.328478
GO:0004809	tRNA (guanine-N2-)-methyltransferase activity	molecular_function	8	1	1020	6	15887	0.328478
GO:0050689	negative regulation of defense response to virus by host	biological_process	9	1	1020	6	15887	0.328478
GO:0044338	canonical Wnt signaling pathway involved in mesenchymal stem cell differentiation	biological_process	9	1	1020	6	15887	0.328478
GO:0044341	sodium-dependent phosphate transport	biological_process	10	1	1020	6	15887	0.328478
GO:0048592	eye morphogenesis	biological_process	7	1	1020	6	15887	0.328478
GO:0010463	mesenchymal cell proliferation	biological_process	4	1	1020	6	15887	0.328478
GO:0048627	myoblast development	biological_process	6	1	1020	6	15887	0.328478
GO:0034668	integrin alpha4-beta1 complex	cellular_component	6	1	1020	6	15887	0.328478
GO:1904219	positive regulation of CDP-diacylglycerol-serine O-phosphatidyltransferase activity	biological_process	8	1	1020	6	15887	0.328478
GO:0048388	endosomal lumen acidification	biological_process	13	1	1020	6	15887	0.328478
GO:0051707	response to other organism	biological_process	6	1	1020	6	15887	0.328478
GO:1904954	canonical Wnt signaling pathway involved in midbrain dopaminergic neuron differentiation	biological_process	9	1	1020	6	15887	0.328478
GO:0042271	susceptibility to natural killer cell mediated cytotoxicity	biological_process	9	1	1020	6	15887	0.328478
GO:0061589	calcium activated phosphatidylserine scrambling	biological_process	9	1	1020	6	15887	0.328478
GO:0004694	eukaryotic translation initiation factor 2alpha kinase activity	molecular_function	9	1	1020	6	15887	0.328478
GO:0045003	double-strand break repair via synthesis-dependent strand annealing	biological_process	11	1	1020	6	15887	0.328478
GO:0016048	detection of temperature stimulus	biological_process	6	1	1020	6	15887	0.328478
GO:0021781	glial cell fate commitment	biological_process	6	1	1020	6	15887	0.328478
GO:1902109	negative regulation of mitochondrial membrane permeability involved in apoptotic process	biological_process	10	1	1020	6	15887	0.328478
GO:0030197	extracellular matrix constituent, lubricant activity	molecular_function	5	1	1020	6	15887	0.328478
GO:2000820	negative regulation of transcription from RNA polymerase II promoter involved in smooth muscle cell differentiation	biological_process	11	1	1020	6	15887	0.328478
GO:0051377	mannose-ethanolamine phosphotransferase activity	molecular_function	7	1	1020	6	15887	0.328478
GO:0035060	brahma complex	cellular_component	8	1	1020	6	15887	0.328478
GO:0006288	base-excision repair, DNA ligation	biological_process	10	1	1020	6	15887	0.328478
GO:0090241	negative regulation of histone H4 acetylation	biological_process	12	1	1020	6	15887	0.328478
GO:0014916	regulation of lung blood pressure	biological_process	6	1	1020	6	15887	0.328478
GO:0048619	embryonic hindgut morphogenesis	biological_process	6	1	1020	6	15887	0.328478
GO:0019907	cyclin-dependent protein kinase activating kinase holoenzyme complex	cellular_component	7	1	1020	6	15887	0.328478
GO:0001704	formation of primary germ layer	biological_process	5	1	1020	6	15887	0.328478
GO:1901077	regulation of relaxation of muscle	biological_process	8	1	1020	6	15887	0.328478
GO:0015732	prostaglandin transport	biological_process	9	1	1020	6	15887	0.328478
GO:0043121	neurotrophin binding	molecular_function	6	1	1020	6	15887	0.328478
GO:0031084	BLOC-2 complex	cellular_component	5	1	1020	6	15887	0.328478
GO:0021530	spinal cord oligodendrocyte cell fate specification	biological_process	8	1	1020	6	15887	0.328478
GO:0033623	regulation of integrin activation	biological_process	7	1	1020	6	15887	0.328478
GO:1904222	positive regulation of serine C-palmitoyltransferase activity	biological_process	8	1	1020	6	15887	0.328478
GO:0048859	formation of anatomical boundary	biological_process	5	1	1020	6	15887	0.328478
GO:0070858	negative regulation of bile acid biosynthetic process	biological_process	11	1	1020	6	15887	0.328478
GO:1903553	positive regulation of extracellular exosome assembly	biological_process	10	1	1020	6	15887	0.328478
GO:0000454	snoRNA guided rRNA pseudouridine synthesis	biological_process	14	1	1020	6	15887	0.328478
GO:0015114	phosphate ion transmembrane transporter activity	molecular_function	8	1	1020	6	15887	0.328478
GO:0060368	regulation of Fc receptor mediated stimulatory signaling pathway	biological_process	8	1	1020	6	15887	0.328478
GO:0060003	copper ion export	biological_process	12	1	1020	6	15887	0.328478
GO:0099519	dense core granule cytoskeletal transport	biological_process	9	1	1020	6	15887	0.328478
GO:0010002	cardioblast differentiation	biological_process	7	1	1020	6	15887	0.328478
GO:2000566	positive regulation of CD8-positive, alpha-beta T cell proliferation	biological_process	13	1	1020	6	15887	0.328478
GO:1902174	positive regulation of keratinocyte apoptotic process	biological_process	11	1	1020	6	15887	0.328478
GO:0043369	CD4-positive or CD8-positive, alpha-beta T cell lineage commitment	biological_process	7	1	1020	6	15887	0.328478
GO:0001602	pancreatic polypeptide receptor activity	molecular_function	9	1	1020	6	15887	0.328478
GO:0004040	amidase activity	molecular_function	7	1	1020	6	15887	0.328478
GO:0015143	urate transmembrane transporter activity	molecular_function	8	1	1020	6	15887	0.328478
GO:0035651	AP-3 adaptor complex binding	molecular_function	5	1	1020	6	15887	0.328478
GO:0044117	growth of symbiont in host	biological_process	6	1	1020	6	15887	0.328478
GO:0010998	regulation of translational initiation by eIF2 alpha phosphorylation	biological_process	10	1	1020	6	15887	0.328478
GO:0052405	negative regulation by host of symbiont molecular function	biological_process	8	1	1020	6	15887	0.328478
GO:0070472	regulation of uterine smooth muscle contraction	biological_process	10	1	1020	6	15887	0.328478
GO:0000811	GINS complex	cellular_component	6	1	1020	6	15887	0.328478
GO:1904894	positive regulation of receptor signaling pathway via STAT	biological_process	9	1	1020	6	15887	0.328478
GO:0031339	negative regulation of vesicle fusion	biological_process	9	1	1020	6	15887	0.328478
GO:0101006	protein histidine phosphatase activity	molecular_function	9	1	1020	6	15887	0.328478
GO:1904970	brush border assembly	biological_process	6	1	1020	6	15887	0.328478
GO:0090482	vitamin transmembrane transporter activity	molecular_function	5	1	1020	6	15887	0.328478
GO:1902911	protein kinase complex	cellular_component	7	1	1020	6	15887	0.328478
GO:0004776	succinate-CoA ligase (GDP-forming) activity	molecular_function	8	1	1020	6	15887	0.328478
GO:0015837	amine transport	biological_process	7	1	1020	6	15887	0.328478
GO:0097229	sperm end piece	cellular_component	5	1	1020	6	15887	0.328478
GO:0008410	CoA-transferase activity	molecular_function	6	1	1020	6	15887	0.328478
GO:1904100	positive regulation of protein O-linked glycosylation	biological_process	11	1	1020	6	15887	0.328478
GO:0021575	hindbrain morphogenesis	biological_process	5	1	1020	6	15887	0.328478
GO:0031315	extrinsic component of mitochondrial outer membrane	cellular_component	6	1	1020	6	15887	0.328478
GO:0021891	olfactory bulb interneuron development	biological_process	9	1	1020	6	15887	0.328478
GO:1903679	positive regulation of cap-independent translational initiation	biological_process	13	1	1020	6	15887	0.328478
GO:0035054	embryonic heart tube anterior/posterior pattern specification	biological_process	7	1	1020	6	15887	0.328478
GO:0070092	regulation of glucagon secretion	biological_process	10	1	1020	6	15887	0.328478
GO:0101030	tRNA-guanine transglycosylation	biological_process	13	1	1020	6	15887	0.328478
GO:0035609	C-terminal protein deglutamylation	biological_process	11	1	1020	6	15887	0.328478
GO:0140311	protein sequestering activity	molecular_function	4	1	1020	6	15887	0.328478
GO:0002408	myeloid dendritic cell chemotaxis	biological_process	7	1	1020	6	15887	0.328478
GO:0003408	optic cup formation involved in camera-type eye development	biological_process	5	1	1020	6	15887	0.328478
GO:0051284	positive regulation of sequestering of calcium ion	biological_process	7	1	1020	6	15887	0.328478
GO:0004775	succinate-CoA ligase (ADP-forming) activity	molecular_function	8	1	1020	6	15887	0.328478
GO:0048014	Tie signaling pathway	biological_process	8	1	1020	6	15887	0.328478
GO:0005503	all-trans retinal binding	molecular_function	8	1	1020	6	15887	0.328478
GO:0072331	signal transduction by p53 class mediator	biological_process	6	1	1020	6	15887	0.328478
GO:0001156	TFIIIC-class transcription factor complex binding	molecular_function	8	1	1020	6	15887	0.328478
GO:0002891	positive regulation of immunoglobulin mediated immune response	biological_process	11	1	1020	6	15887	0.328478
GO:0004031	aldehyde oxidase activity	molecular_function	7	1	1020	6	15887	0.328478
GO:0062189	anandamide 14,15 epoxidase activity	NA	NA	1	1020	6	15887	0.328478
GO:0000103	sulfate assimilation	biological_process	6	1	1020	6	15887	0.328478
GO:0010988	regulation of low-density lipoprotein particle clearance	biological_process	7	1	1020	6	15887	0.328478
GO:0006742	NADP catabolic process	biological_process	5	1	1020	6	15887	0.328478
GO:0005588	collagen type V trimer	cellular_component	6	1	1020	6	15887	0.328478
GO:0010621	negative regulation of transcription by transcription factor localization	biological_process	7	1	1020	6	15887	0.328478
GO:1902474	positive regulation of protein localization to synapse	biological_process	6	1	1020	6	15887	0.328478
GO:0002947	tumor necrosis factor receptor superfamily complex	cellular_component	5	1	1020	6	15887	0.328478
GO:0072218	metanephric ascending thin limb development	biological_process	9	1	1020	6	15887	0.328478
GO:0035268	protein mannosylation	biological_process	10	1	1020	6	15887	0.328478
GO:0005968	Rab-protein geranylgeranyltransferase complex	cellular_component	6	1	1020	6	15887	0.328478
GO:0048256	flap endonuclease activity	molecular_function	9	1	1020	6	15887	0.328478
GO:0060379	cardiac muscle cell myoblast differentiation	biological_process	8	1	1020	6	15887	0.328478
GO:0051204	protein insertion into mitochondrial membrane	biological_process	8	1	1020	6	15887	0.328478
GO:0004800	thyroxine 5'-deiodinase activity	molecular_function	5	1	1020	6	15887	0.328478
GO:0070646	protein modification by small protein removal	biological_process	8	1	1020	6	15887	0.328478
GO:0032827	negative regulation of natural killer cell differentiation involved in immune response	biological_process	8	1	1020	6	15887	0.328478
GO:0005157	macrophage colony-stimulating factor receptor binding	molecular_function	7	1	1020	6	15887	0.328478
GO:0005896	interleukin-6 receptor complex	cellular_component	6	1	1020	6	15887	0.328478
GO:1901671	positive regulation of superoxide dismutase activity	biological_process	8	1	1020	6	15887	0.328478
GO:0047756	chondroitin 4-sulfotransferase activity	molecular_function	8	1	1020	6	15887	0.328478
GO:1902951	negative regulation of dendritic spine maintenance	biological_process	9	1	1020	6	15887	0.328478
GO:0002793	positive regulation of peptide secretion	biological_process	9	1	1020	6	15887	0.328478
GO:0010826	negative regulation of centrosome duplication	biological_process	10	1	1020	6	15887	0.328478
GO:0016076	snRNA catabolic process	biological_process	11	1	1020	6	15887	0.328478
GO:0035437	maintenance of protein localization in endoplasmic reticulum	biological_process	8	1	1020	6	15887	0.328478
GO:0021778	oligodendrocyte cell fate specification	biological_process	7	1	1020	6	15887	0.328478
GO:0050649	testosterone 6-beta-hydroxylase activity	molecular_function	7	1	1020	6	15887	0.328478
GO:0072179	nephric duct formation	biological_process	7	1	1020	6	15887	0.328478
GO:0046695	SLIK (SAGA-like) complex	cellular_component	8	1	1020	6	15887	0.328478
GO:0045964	positive regulation of dopamine metabolic process	biological_process	10	1	1020	6	15887	0.328478
GO:0048538	thymus development	biological_process	7	7	1020	88	15887	0.335532
GO:0016712	oxidoreductase activity, acting on paired donors, with incorporation or reduction of molecular oxygen, reduced flavin or flavoprotein as one donor, and incorporation of one atom of oxygen	molecular_function	6	3	1020	32	15887	0.338472
GO:0031527	filopodium membrane	cellular_component	6	3	1020	32	15887	0.338472
GO:0031640	killing of cells of other organism	biological_process	4	3	1020	32	15887	0.338472
GO:0070317	negative regulation of G0 to G1 transition	biological_process	9	6	1020	74	15887	0.338786
GO:0006695	cholesterol biosynthetic process	biological_process	9	6	1020	74	15887	0.338786
GO:0010719	negative regulation of epithelial to mesenchymal transition	biological_process	8	5	1020	60	15887	0.341189
GO:0033137	negative regulation of peptidyl-serine phosphorylation	biological_process	11	4	1020	46	15887	0.341846
GO:2000352	negative regulation of endothelial cell apoptotic process	biological_process	11	4	1020	46	15887	0.341846
GO:0014044	Schwann cell development	biological_process	7	2	1020	19	15887	0.347135
GO:0051252	regulation of RNA metabolic process	biological_process	8	2	1020	19	15887	0.347135
GO:0034975	protein folding in endoplasmic reticulum	biological_process	5	2	1020	19	15887	0.347135
GO:0045823	positive regulation of heart contraction	biological_process	9	2	1020	19	15887	0.347135
GO:0035865	cellular response to potassium ion	biological_process	8	2	1020	19	15887	0.347135
GO:0007289	spermatid nucleus differentiation	biological_process	7	2	1020	19	15887	0.347135
GO:0090136	epithelial cell-cell adhesion	biological_process	6	2	1020	19	15887	0.347135
GO:0010888	negative regulation of lipid storage	biological_process	6	2	1020	19	15887	0.347135
GO:0051561	positive regulation of mitochondrial calcium ion concentration	biological_process	13	2	1020	19	15887	0.347135
GO:0071564	npBAF complex	cellular_component	8	2	1020	19	15887	0.347135
GO:0005391	sodium:potassium-exchanging ATPase activity	molecular_function	11	2	1020	19	15887	0.347135
GO:0061700	GATOR2 complex	cellular_component	4	2	1020	19	15887	0.347135
GO:0031227	intrinsic component of endoplasmic reticulum membrane	cellular_component	6	2	1020	19	15887	0.347135
GO:0090656	t-circle formation	biological_process	9	2	1020	19	15887	0.347135
GO:0001967	suckling behavior	biological_process	5	2	1020	19	15887	0.347135
GO:0002091	negative regulation of receptor internalization	biological_process	8	2	1020	19	15887	0.347135
GO:0045159	myosin II binding	molecular_function	7	2	1020	19	15887	0.347135
GO:0008219	cell death	biological_process	4	6	1020	75	15887	0.350397
GO:0000794	condensed nuclear chromosome	cellular_component	8	6	1020	75	15887	0.350397
GO:0045931	positive regulation of mitotic cell cycle	biological_process	8	5	1020	61	15887	0.354156
GO:0003222	ventricular trabecula myocardium morphogenesis	biological_process	9	3	1020	33	15887	0.356422
GO:0031267	small GTPase binding	molecular_function	7	3	1020	33	15887	0.356422
GO:0010165	response to X-ray	biological_process	7	3	1020	33	15887	0.356422
GO:0140326	ATPase-coupled intramembrane lipid transporter activity	molecular_function	5	3	1020	33	15887	0.356422
GO:0006790	sulfur compound metabolic process	biological_process	5	3	1020	33	15887	0.356422
GO:0022011	myelination in peripheral nervous system	biological_process	7	3	1020	33	15887	0.356422
GO:0001935	endothelial cell proliferation	biological_process	5	3	1020	33	15887	0.356422
GO:0099060	integral component of postsynaptic specialization membrane	cellular_component	5	3	1020	33	15887	0.356422
GO:0030199	collagen fibril organization	biological_process	7	7	1020	90	15887	0.356746
GO:0030514	negative regulation of BMP signaling pathway	biological_process	11	6	1020	76	15887	0.36204
GO:0007093	mitotic cell cycle checkpoint	biological_process	5	5	1020	62	15887	0.367142
GO:0071006	U2-type catalytic step 1 spliceosome	cellular_component	8	2	1020	20	15887	0.370872
GO:0140268	endoplasmic reticulum-plasma membrane contact site	cellular_component	5	2	1020	20	15887	0.370872
GO:0035020	regulation of Rac protein signal transduction	biological_process	11	2	1020	20	15887	0.370872
GO:0060020	Bergmann glial cell differentiation	biological_process	8	2	1020	20	15887	0.370872
GO:0030296	protein tyrosine kinase activator activity	molecular_function	8	2	1020	20	15887	0.370872
GO:0044232	organelle membrane contact site	cellular_component	4	2	1020	20	15887	0.370872
GO:0010907	positive regulation of glucose metabolic process	biological_process	10	2	1020	20	15887	0.370872
GO:0043276	anoikis	biological_process	7	2	1020	20	15887	0.370872
GO:1903715	regulation of aerobic respiration	biological_process	9	2	1020	20	15887	0.370872
GO:0036157	outer dynein arm	cellular_component	7	2	1020	20	15887	0.370872
GO:0071492	cellular response to UV-A	biological_process	9	2	1020	20	15887	0.370872
GO:0032966	negative regulation of collagen biosynthetic process	biological_process	8	2	1020	20	15887	0.370872
GO:0036010	protein localization to endosome	biological_process	8	2	1020	20	15887	0.370872
GO:0070327	thyroid hormone transport	biological_process	7	2	1020	20	15887	0.370872
GO:0045591	positive regulation of regulatory T cell differentiation	biological_process	11	2	1020	20	15887	0.370872
GO:0071233	cellular response to leucine	biological_process	8	2	1020	20	15887	0.370872
GO:0046902	regulation of mitochondrial membrane permeability	biological_process	8	2	1020	20	15887	0.370872
GO:0007252	I-kappaB phosphorylation	biological_process	10	2	1020	20	15887	0.370872
GO:0001881	receptor recycling	biological_process	8	2	1020	20	15887	0.370872
GO:0002260	lymphocyte homeostasis	biological_process	5	2	1020	20	15887	0.370872
GO:2000278	regulation of DNA biosynthetic process	biological_process	9	1	1020	7	15887	0.371608
GO:2001212	regulation of vasculogenesis	biological_process	7	1	1020	7	15887	0.371608
GO:0072676	lymphocyte migration	biological_process	5	1	1020	7	15887	0.371608
GO:0070193	synaptonemal complex organization	biological_process	7	1	1020	7	15887	0.371608
GO:0000026	alpha-1,2-mannosyltransferase activity	molecular_function	8	1	1020	7	15887	0.371608
GO:0016508	long-chain-enoyl-CoA hydratase activity	molecular_function	7	1	1020	7	15887	0.371608
GO:0045103	intermediate filament-based process	biological_process	4	1	1020	7	15887	0.371608
GO:1903278	positive regulation of sodium ion export across plasma membrane	biological_process	12	1	1020	7	15887	0.371608
GO:0001845	phagolysosome assembly	biological_process	9	1	1020	7	15887	0.371608
GO:2000552	negative regulation of T-helper 2 cell cytokine production	biological_process	12	1	1020	7	15887	0.371608
GO:0044313	protein K6-linked deubiquitination	biological_process	10	1	1020	7	15887	0.371608
GO:0002711	positive regulation of T cell mediated immunity	biological_process	10	1	1020	7	15887	0.371608
GO:2000672	negative regulation of motor neuron apoptotic process	biological_process	11	1	1020	7	15887	0.371608
GO:0020018	ciliary pocket membrane	cellular_component	7	1	1020	7	15887	0.371608
GO:0038028	insulin receptor signaling pathway via phosphatidylinositol 3-kinase	biological_process	9	1	1020	7	15887	0.371608
GO:0004768	stearoyl-CoA 9-desaturase activity	molecular_function	8	1	1020	7	15887	0.371608
GO:0035089	establishment of apical/basal cell polarity	biological_process	7	1	1020	7	15887	0.371608
GO:0060437	lung growth	biological_process	5	1	1020	7	15887	0.371608
GO:1902896	terminal web assembly	biological_process	9	1	1020	7	15887	0.371608
GO:0032946	positive regulation of mononuclear cell proliferation	biological_process	9	1	1020	7	15887	0.371608
GO:0017064	fatty acid amide hydrolase activity	molecular_function	7	1	1020	7	15887	0.371608
GO:0072359	circulatory system development	biological_process	6	1	1020	7	15887	0.371608
GO:0004582	dolichyl-phosphate beta-D-mannosyltransferase activity	molecular_function	8	1	1020	7	15887	0.371608
GO:0060421	positive regulation of heart growth	biological_process	9	1	1020	7	15887	0.371608
GO:0052832	inositol monophosphate 3-phosphatase activity	molecular_function	10	1	1020	7	15887	0.371608
GO:0061198	fungiform papilla formation	biological_process	5	1	1020	7	15887	0.371608
GO:0042816	vitamin B6 metabolic process	biological_process	7	1	1020	7	15887	0.371608
GO:0071709	membrane assembly	biological_process	6	1	1020	7	15887	0.371608
GO:0007632	visual behavior	biological_process	4	1	1020	7	15887	0.371608
GO:0044530	supraspliceosomal complex	cellular_component	7	1	1020	7	15887	0.371608
GO:0005345	purine nucleobase transmembrane transporter activity	molecular_function	6	1	1020	7	15887	0.371608
GO:0036123	histone H3-K9 dimethylation	biological_process	13	1	1020	7	15887	0.371608
GO:0001951	intestinal D-glucose absorption	biological_process	9	1	1020	7	15887	0.371608
GO:0034728	nucleosome organization	biological_process	6	1	1020	7	15887	0.371608
GO:0008321	Ral guanyl-nucleotide exchange factor activity	molecular_function	9	1	1020	7	15887	0.371608
GO:0008934	inositol monophosphate 1-phosphatase activity	molecular_function	10	1	1020	7	15887	0.371608
GO:0052833	inositol monophosphate 4-phosphatase activity	molecular_function	10	1	1020	7	15887	0.371608
GO:0071074	eukaryotic initiation factor eIF2 binding	molecular_function	6	1	1020	7	15887	0.371608
GO:0019086	late viral transcription	biological_process	8	1	1020	7	15887	0.371608
GO:0070110	ciliary neurotrophic factor receptor complex	cellular_component	6	1	1020	7	15887	0.371608
GO:0019673	GDP-mannose metabolic process	biological_process	9	1	1020	7	15887	0.371608
GO:0051654	establishment of mitochondrion localization	biological_process	7	1	1020	7	15887	0.371608
GO:0008475	procollagen-lysine 5-dioxygenase activity	molecular_function	8	1	1020	7	15887	0.371608
GO:0046952	ketone body catabolic process	biological_process	7	1	1020	7	15887	0.371608
GO:0060743	epithelial cell maturation involved in prostate gland development	biological_process	7	1	1020	7	15887	0.371608
GO:0061590	calcium activated phosphatidylcholine scrambling	biological_process	9	1	1020	7	15887	0.371608
GO:0102420	sn-1-glycerol-3-phosphate C16:0-DCA-CoA acyl transferase activity	molecular_function	7	1	1020	7	15887	0.371608
GO:0016884	carbon-nitrogen ligase activity, with glutamine as amido-N-donor	molecular_function	6	1	1020	7	15887	0.371608
GO:0042501	serine phosphorylation of STAT protein	biological_process	11	1	1020	7	15887	0.371608
GO:0006021	inositol biosynthetic process	biological_process	8	1	1020	7	15887	0.371608
GO:0030382	sperm mitochondrion organization	biological_process	7	1	1020	7	15887	0.371608
GO:0015254	glycerol channel activity	molecular_function	7	1	1020	7	15887	0.371608
GO:0070698	type I activin receptor binding	molecular_function	9	1	1020	7	15887	0.371608
GO:0009099	valine biosynthetic process	biological_process	11	1	1020	7	15887	0.371608
GO:0043367	CD4-positive, alpha-beta T cell differentiation	biological_process	10	1	1020	7	15887	0.371608
GO:0002429	immune response-activating cell surface receptor signaling pathway	biological_process	6	1	1020	7	15887	0.371608
GO:0018119	peptidyl-cysteine S-nitrosylation	biological_process	10	1	1020	7	15887	0.371608
GO:0016934	extracellularly glycine-gated chloride channel activity	molecular_function	10	1	1020	7	15887	0.371608
GO:0065002	intracellular protein transmembrane transport	biological_process	11	1	1020	7	15887	0.371608
GO:0000799	nuclear condensin complex	cellular_component	7	1	1020	7	15887	0.371608
GO:0060183	apelin receptor signaling pathway	biological_process	6	1	1020	7	15887	0.371608
GO:0097470	ribbon synapse	cellular_component	4	1	1020	7	15887	0.371608
GO:0035658	Mon1-Ccz1 complex	cellular_component	4	1	1020	7	15887	0.371608
GO:0003989	acetyl-CoA carboxylase activity	molecular_function	7	1	1020	7	15887	0.371608
GO:0042175	nuclear outer membrane-endoplasmic reticulum membrane network	cellular_component	4	1	1020	7	15887	0.371608
GO:0033140	negative regulation of peptidyl-serine phosphorylation of STAT protein	biological_process	12	1	1020	7	15887	0.371608
GO:0003910	DNA ligase (ATP) activity	molecular_function	7	1	1020	7	15887	0.371608
GO:0010693	negative regulation of alkaline phosphatase activity	biological_process	12	1	1020	7	15887	0.371608
GO:0003278	apoptotic process involved in heart morphogenesis	biological_process	9	1	1020	7	15887	0.371608
GO:0046629	gamma-delta T cell activation	biological_process	8	1	1020	7	15887	0.371608
GO:0010729	positive regulation of hydrogen peroxide biosynthetic process	biological_process	10	1	1020	7	15887	0.371608
GO:0008384	IkappaB kinase activity	molecular_function	9	1	1020	7	15887	0.371608
GO:0016533	protein kinase 5 complex	cellular_component	9	1	1020	7	15887	0.371608
GO:0015173	aromatic amino acid transmembrane transporter activity	molecular_function	8	1	1020	7	15887	0.371608
GO:0072073	kidney epithelium development	biological_process	7	1	1020	7	15887	0.371608
GO:0005459	UDP-galactose transmembrane transporter activity	molecular_function	8	1	1020	7	15887	0.371608
GO:0033128	negative regulation of histone phosphorylation	biological_process	11	1	1020	7	15887	0.371608
GO:0047655	allyl-alcohol dehydrogenase activity	molecular_function	7	1	1020	7	15887	0.371608
GO:0006210	thymine catabolic process	biological_process	11	1	1020	7	15887	0.371608
GO:0072278	metanephric comma-shaped body morphogenesis	biological_process	6	1	1020	7	15887	0.371608
GO:0030942	endoplasmic reticulum signal peptide binding	molecular_function	7	1	1020	7	15887	0.371608
GO:1900164	nodal signaling pathway involved in determination of lateral mesoderm left/right asymmetry	biological_process	11	1	1020	7	15887	0.371608
GO:0090722	receptor-receptor interaction	molecular_function	6	1	1020	7	15887	0.371608
GO:1902263	apoptotic process involved in embryonic digit morphogenesis	biological_process	9	1	1020	7	15887	0.371608
GO:0060574	intestinal epithelial cell maturation	biological_process	8	1	1020	7	15887	0.371608
GO:0015079	potassium ion transmembrane transporter activity	molecular_function	9	1	1020	7	15887	0.371608
GO:0072050	S-shaped body morphogenesis	biological_process	5	1	1020	7	15887	0.371608
GO:0048742	regulation of skeletal muscle fiber development	biological_process	10	1	1020	7	15887	0.371608
GO:0021869	forebrain ventricular zone progenitor cell division	biological_process	5	1	1020	7	15887	0.371608
GO:0009097	isoleucine biosynthetic process	biological_process	11	1	1020	7	15887	0.371608
GO:0010484	H3 histone acetyltransferase activity	molecular_function	12	1	1020	7	15887	0.371608
GO:0031133	regulation of axon diameter	biological_process	7	1	1020	7	15887	0.371608
GO:0022858	alanine transmembrane transporter activity	molecular_function	7	1	1020	7	15887	0.371608
GO:0015855	pyrimidine nucleobase transport	biological_process	8	1	1020	7	15887	0.371608
GO:0009637	response to blue light	biological_process	7	1	1020	7	15887	0.371608
GO:1903843	cellular response to arsenite ion	biological_process	7	1	1020	7	15887	0.371608
GO:0019482	beta-alanine metabolic process	biological_process	9	1	1020	7	15887	0.371608
GO:0044265	cellular macromolecule catabolic process	biological_process	7	1	1020	7	15887	0.371608
GO:0048382	mesendoderm development	biological_process	5	1	1020	7	15887	0.371608
GO:0061308	cardiac neural crest cell development involved in heart development	biological_process	8	1	1020	7	15887	0.371608
GO:0060948	cardiac vascular smooth muscle cell development	biological_process	7	1	1020	7	15887	0.371608
GO:0031427	response to methotrexate	biological_process	6	1	1020	7	15887	0.371608
GO:1904030	negative regulation of cyclin-dependent protein kinase activity	biological_process	12	1	1020	7	15887	0.371608
GO:0030292	protein tyrosine kinase inhibitor activity	molecular_function	8	1	1020	7	15887	0.371608
GO:0003177	pulmonary valve development	biological_process	7	1	1020	7	15887	0.371608
GO:2000582	positive regulation of ATP-dependent microtubule motor activity, plus-end-directed	biological_process	9	1	1020	7	15887	0.371608
GO:0045716	positive regulation of low-density lipoprotein particle receptor biosynthetic process	biological_process	10	1	1020	7	15887	0.371608
GO:0015722	canalicular bile acid transport	biological_process	9	1	1020	7	15887	0.371608
GO:2000170	positive regulation of peptidyl-cysteine S-nitrosylation	biological_process	10	1	1020	7	15887	0.371608
GO:0000322	storage vacuole	cellular_component	7	1	1020	7	15887	0.371608
GO:0050567	glutaminyl-tRNA synthase (glutamine-hydrolyzing) activity	molecular_function	7	1	1020	7	15887	0.371608
GO:0071535	RING-like zinc finger domain binding	molecular_function	6	1	1020	7	15887	0.371608
GO:0072334	UDP-galactose transmembrane transport	biological_process	9	1	1020	7	15887	0.371608
GO:1990182	exosomal secretion	biological_process	8	1	1020	7	15887	0.371608
GO:0030047	actin modification	biological_process	9	1	1020	7	15887	0.371608
GO:0090049	regulation of cell migration involved in sprouting angiogenesis	biological_process	11	1	1020	7	15887	0.371608
GO:1901020	negative regulation of calcium ion transmembrane transporter activity	biological_process	8	1	1020	7	15887	0.371608
GO:0030956	glutamyl-tRNA(Gln) amidotransferase complex	cellular_component	4	1	1020	7	15887	0.371608
GO:0005846	nuclear cap binding complex	cellular_component	5	1	1020	7	15887	0.371608
GO:0042133	neurotransmitter metabolic process	biological_process	6	1	1020	7	15887	0.371608
GO:0038062	protein tyrosine kinase collagen receptor activity	molecular_function	10	1	1020	7	15887	0.371608
GO:0001842	neural fold formation	biological_process	8	1	1020	7	15887	0.371608
GO:0044406	adhesion of symbiont to host	biological_process	4	1	1020	7	15887	0.371608
GO:0061591	calcium activated galactosylceramide scrambling	biological_process	9	1	1020	7	15887	0.371608
GO:0016505	peptidase activator activity involved in apoptotic process	molecular_function	7	1	1020	7	15887	0.371608
GO:1904823	purine nucleobase transmembrane transport	biological_process	9	1	1020	7	15887	0.371608
GO:0032767	copper-dependent protein binding	molecular_function	5	1	1020	7	15887	0.371608
GO:0034465	response to carbon monoxide	biological_process	6	1	1020	7	15887	0.371608
GO:0099104	potassium channel activator activity	molecular_function	7	1	1020	7	15887	0.371608
GO:0043137	DNA replication, removal of RNA primer	biological_process	8	1	1020	7	15887	0.371608
GO:0033185	dolichol-phosphate-mannose synthase complex	cellular_component	6	1	1020	7	15887	0.371608
GO:0004731	purine-nucleoside phosphorylase activity	molecular_function	7	1	1020	7	15887	0.371608
GO:0071453	cellular response to oxygen levels	biological_process	6	1	1020	7	15887	0.371608
GO:0021942	radial glia guided migration of Purkinje cell	biological_process	9	1	1020	7	15887	0.371608
GO:0004792	thiosulfate sulfurtransferase activity	molecular_function	7	1	1020	7	15887	0.371608
GO:0060538	skeletal muscle organ development	biological_process	7	1	1020	7	15887	0.371608
GO:1990569	UDP-N-acetylglucosamine transmembrane transport	biological_process	9	1	1020	7	15887	0.371608
GO:0010922	positive regulation of phosphatase activity	biological_process	11	1	1020	7	15887	0.371608
GO:0033565	ESCRT-0 complex	cellular_component	5	1	1020	7	15887	0.371608
GO:0061588	calcium activated phospholipid scrambling	biological_process	8	1	1020	7	15887	0.371608
GO:0070404	NADH binding	molecular_function	6	1	1020	7	15887	0.371608
GO:0035494	SNARE complex disassembly	biological_process	8	1	1020	7	15887	0.371608
GO:0051128	regulation of cellular component organization	biological_process	6	1	1020	7	15887	0.371608
GO:1901031	regulation of response to reactive oxygen species	biological_process	8	1	1020	7	15887	0.371608
GO:0072221	metanephric distal convoluted tubule development	biological_process	9	1	1020	7	15887	0.371608
GO:0043734	DNA-N1-methyladenine dioxygenase activity	molecular_function	7	1	1020	7	15887	0.371608
GO:0003909	DNA ligase activity	molecular_function	6	1	1020	7	15887	0.371608
GO:0016321	female meiosis chromosome segregation	biological_process	5	1	1020	7	15887	0.371608
GO:0006659	phosphatidylserine biosynthetic process	biological_process	7	1	1020	7	15887	0.371608
GO:0086003	cardiac muscle cell contraction	biological_process	7	1	1020	7	15887	0.371608
GO:0030943	mitochondrion targeting sequence binding	molecular_function	7	1	1020	7	15887	0.371608
GO:0060025	regulation of synaptic activity	biological_process	9	1	1020	7	15887	0.371608
GO:0090649	response to oxygen-glucose deprivation	biological_process	7	1	1020	7	15887	0.371608
GO:0072095	regulation of branch elongation involved in ureteric bud branching	biological_process	7	1	1020	7	15887	0.371608
GO:0043503	skeletal muscle fiber adaptation	biological_process	5	1	1020	7	15887	0.371608
GO:1903659	regulation of complement-dependent cytotoxicity	biological_process	6	1	1020	7	15887	0.371608
GO:0090207	regulation of triglyceride metabolic process	biological_process	8	1	1020	7	15887	0.371608
GO:0110104	mRNA alternative polyadenylation	biological_process	11	1	1020	7	15887	0.371608
GO:0034241	positive regulation of macrophage fusion	biological_process	9	1	1020	7	15887	0.371608
GO:0008332	low voltage-gated calcium channel activity	molecular_function	10	1	1020	7	15887	0.371608
GO:0072207	metanephric epithelium development	biological_process	8	1	1020	7	15887	0.371608
GO:0052834	inositol monophosphate phosphatase activity	molecular_function	9	1	1020	7	15887	0.371608
GO:0005499	vitamin D binding	molecular_function	6	1	1020	7	15887	0.371608
GO:0071393	cellular response to progesterone stimulus	biological_process	7	1	1020	7	15887	0.371608
GO:0090170	regulation of Golgi inheritance	biological_process	9	1	1020	7	15887	0.371608
GO:1902462	positive regulation of mesenchymal stem cell proliferation	biological_process	9	1	1020	7	15887	0.371608
GO:0005462	UDP-N-acetylglucosamine transmembrane transporter activity	molecular_function	8	1	1020	7	15887	0.371608
GO:0038127	ERBB signaling pathway	biological_process	8	1	1020	7	15887	0.371608
GO:0070681	glutaminyl-tRNAGln biosynthesis via transamidation	biological_process	12	1	1020	7	15887	0.371608
GO:1990168	protein K33-linked deubiquitination	biological_process	10	1	1020	7	15887	0.371608
GO:1990518	single-stranded 3'-5' DNA helicase activity	molecular_function	13	1	1020	7	15887	0.371608
GO:0071871	response to epinephrine	biological_process	8	1	1020	7	15887	0.371608
GO:0071205	protein localization to juxtaparanode region of axon	biological_process	7	1	1020	7	15887	0.371608
GO:0072104	glomerular capillary formation	biological_process	6	1	1020	7	15887	0.371608
GO:0071801	regulation of podosome assembly	biological_process	7	1	1020	7	15887	0.371608
GO:0015016	[heparan sulfate]-glucosamine N-sulfotransferase activity	molecular_function	8	1	1020	7	15887	0.371608
GO:0001832	blastocyst growth	biological_process	5	1	1020	7	15887	0.371608
GO:0002158	osteoclast proliferation	biological_process	5	1	1020	7	15887	0.371608
GO:0035621	ER to Golgi ceramide transport	biological_process	9	1	1020	7	15887	0.371608
GO:0004366	glycerol-3-phosphate O-acyltransferase activity	molecular_function	8	1	1020	7	15887	0.371608
GO:0050833	pyruvate transmembrane transporter activity	molecular_function	8	1	1020	7	15887	0.371608
GO:0072320	volume-sensitive chloride channel activity	molecular_function	9	1	1020	7	15887	0.371608
GO:0016717	oxidoreductase activity, acting on paired donors, with oxidation of a pair of donors resulting in the reduction of molecular oxygen to two molecules of water	molecular_function	6	1	1020	7	15887	0.371608
GO:0003205	cardiac chamber development	biological_process	5	1	1020	7	15887	0.371608
GO:0005891	voltage-gated calcium channel complex	cellular_component	9	4	1020	48	15887	0.371624
GO:0004993	G protein-coupled serotonin receptor activity	molecular_function	8	4	1020	48	15887	0.371624
GO:0002224	toll-like receptor signaling pathway	biological_process	8	6	1020	77	15887	0.373703
GO:0031589	cell-substrate adhesion	biological_process	5	3	1020	34	15887	0.374303
GO:0098686	hippocampal mossy fiber to CA3 synapse	cellular_component	5	3	1020	34	15887	0.374303
GO:0033189	response to vitamin A	biological_process	9	3	1020	34	15887	0.374303
GO:0042326	negative regulation of phosphorylation	biological_process	10	3	1020	34	15887	0.374303
GO:0060324	face development	biological_process	5	3	1020	34	15887	0.374303
GO:0030032	lamellipodium assembly	biological_process	8	5	1020	63	15887	0.380134
GO:0050714	positive regulation of protein secretion	biological_process	10	6	1020	78	15887	0.385377
GO:0045445	myoblast differentiation	biological_process	6	3	1020	35	15887	0.392084
GO:1901653	cellular response to peptide	biological_process	8	3	1020	35	15887	0.392084
GO:0007007	inner mitochondrial membrane organization	biological_process	8	3	1020	35	15887	0.392084
GO:0033617	mitochondrial respiratory chain complex IV assembly	biological_process	10	3	1020	35	15887	0.392084
GO:0005086	ARF guanyl-nucleotide exchange factor activity	molecular_function	8	3	1020	35	15887	0.392084
GO:0046847	filopodium assembly	biological_process	8	3	1020	35	15887	0.392084
GO:0098632	cell-cell adhesion mediator activity	molecular_function	5	3	1020	35	15887	0.392084
GO:0030166	proteoglycan biosynthetic process	biological_process	9	3	1020	35	15887	0.392084
GO:0004180	carboxypeptidase activity	molecular_function	8	5	1020	64	15887	0.393117
GO:0042060	wound healing	biological_process	6	13	1020	183	15887	0.394155
GO:0016651	oxidoreductase activity, acting on NAD(P)H	molecular_function	5	2	1020	21	15887	0.394256
GO:0000727	double-strand break repair via break-induced replication	biological_process	11	2	1020	21	15887	0.394256
GO:0035136	forelimb morphogenesis	biological_process	7	2	1020	21	15887	0.394256
GO:0019841	retinol binding	molecular_function	7	2	1020	21	15887	0.394256
GO:0000338	protein deneddylation	biological_process	9	2	1020	21	15887	0.394256
GO:0051014	actin filament severing	biological_process	5	2	1020	21	15887	0.394256
GO:0005890	sodium:potassium-exchanging ATPase complex	cellular_component	8	2	1020	21	15887	0.394256
GO:0042789	mRNA transcription by RNA polymerase II	biological_process	10	2	1020	21	15887	0.394256
GO:0035459	vesicle cargo loading	biological_process	6	2	1020	21	15887	0.394256
GO:0048246	macrophage chemotaxis	biological_process	6	2	1020	21	15887	0.394256
GO:0016446	somatic hypermutation of immunoglobulin genes	biological_process	6	2	1020	21	15887	0.394256
GO:0043486	histone exchange	biological_process	7	2	1020	21	15887	0.394256
GO:0046475	glycerophospholipid catabolic process	biological_process	9	2	1020	21	15887	0.394256
GO:2000049	positive regulation of cell-cell adhesion mediated by cadherin	biological_process	8	2	1020	21	15887	0.394256
GO:2000601	positive regulation of Arp2/3 complex-mediated actin nucleation	biological_process	11	2	1020	21	15887	0.394256
GO:0045657	positive regulation of monocyte differentiation	biological_process	10	2	1020	21	15887	0.394256
GO:0016594	glycine binding	molecular_function	5	2	1020	21	15887	0.394256
GO:0060285	cilium-dependent cell motility	biological_process	7	2	1020	21	15887	0.394256
GO:0002430	complement receptor mediated signaling pathway	biological_process	7	2	1020	21	15887	0.394256
GO:0003094	glomerular filtration	biological_process	7	2	1020	21	15887	0.394256
GO:0002523	leukocyte migration involved in inflammatory response	biological_process	5	2	1020	21	15887	0.394256
GO:0032041	NAD-dependent histone deacetylase activity (H3-K14 specific	molecular_function	9	2	1020	21	15887	0.394256
GO:0043525	positive regulation of neuron apoptotic process	biological_process	10	7	1020	94	15887	0.399456
GO:0014003	oligodendrocyte development	biological_process	7	4	1020	50	15887	0.401297
GO:0090314	positive regulation of protein targeting to membrane	biological_process	11	4	1020	50	15887	0.401297
GO:0006958	complement activation, classical pathway	biological_process	6	4	1020	50	15887	0.401297
GO:0055007	cardiac muscle cell differentiation	biological_process	7	4	1020	50	15887	0.401297
GO:0017056	structural constituent of nuclear pore	molecular_function	4	4	1020	50	15887	0.401297
GO:0010575	positive regulation of vascular endothelial growth factor production	biological_process	8	4	1020	50	15887	0.401297
GO:0048041	focal adhesion assembly	biological_process	9	4	1020	50	15887	0.401297
GO:0000724	double-strand break repair via homologous recombination	biological_process	10	10	1020	139	15887	0.402146
GO:0008180	COP9 signalosome	cellular_component	4	5	1020	65	15887	0.406077
GO:0050772	positive regulation of axonogenesis	biological_process	10	5	1020	65	15887	0.406077
GO:0001541	ovarian follicle development	biological_process	6	6	1020	80	15887	0.408712
GO:0042149	cellular response to glucose starvation	biological_process	9	6	1020	80	15887	0.408712
GO:0009952	anterior/posterior pattern specification	biological_process	6	13	1020	185	15887	0.409398
GO:0001226	RNA polymerase II transcription corepressor binding	molecular_function	8	3	1020	36	15887	0.409732
GO:0030695	GTPase regulator activity	molecular_function	6	3	1020	36	15887	0.409732
GO:0007130	synaptonemal complex assembly	biological_process	6	3	1020	36	15887	0.409732
GO:0030326	embryonic limb morphogenesis	biological_process	7	7	1020	95	15887	0.410144
GO:0010494	cytoplasmic stress granule	cellular_component	8	10	1020	140	15887	0.410928
GO:0042289	MHC class II protein binding	molecular_function	7	1	1020	8	15887	0.411971
GO:0008238	exopeptidase activity	molecular_function	7	1	1020	8	15887	0.411971
GO:0031999	negative regulation of fatty acid beta-oxidation	biological_process	9	1	1020	8	15887	0.411971
GO:1903895	negative regulation of IRE1-mediated unfolded protein response	biological_process	10	1	1020	8	15887	0.411971
GO:0019062	virion attachment to host cell	biological_process	6	1	1020	8	15887	0.411971
GO:0004370	glycerol kinase activity	molecular_function	7	1	1020	8	15887	0.411971
GO:1903978	regulation of microglial cell activation	biological_process	8	1	1020	8	15887	0.411971
GO:0009597	detection of virus	biological_process	8	1	1020	8	15887	0.411971
GO:2000535	regulation of entry of bacterium into host cell	biological_process	7	1	1020	8	15887	0.411971
GO:0005000	vasopressin receptor activity	molecular_function	7	1	1020	8	15887	0.411971
GO:0034227	tRNA thio-modification	biological_process	13	1	1020	8	15887	0.411971
GO:0060662	salivary gland cavitation	biological_process	7	1	1020	8	15887	0.411971
GO:0022027	interkinetic nuclear migration	biological_process	8	1	1020	8	15887	0.411971
GO:0061673	mitotic spindle astral microtubule	cellular_component	10	1	1020	8	15887	0.411971
GO:1990910	response to hypobaric hypoxia	biological_process	6	1	1020	8	15887	0.411971
GO:0043227	membrane-bounded organelle	cellular_component	4	1	1020	8	15887	0.411971
GO:0051387	negative regulation of neurotrophin TRK receptor signaling pathway	biological_process	9	1	1020	8	15887	0.411971
GO:0090244	Wnt signaling pathway involved in somitogenesis	biological_process	8	1	1020	8	15887	0.411971
GO:0045191	regulation of isotype switching	biological_process	10	1	1020	8	15887	0.411971
GO:0070516	CAK-ERCC2 complex	cellular_component	4	1	1020	8	15887	0.411971
GO:1903039	positive regulation of leukocyte cell-cell adhesion	biological_process	8	1	1020	8	15887	0.411971
GO:0090400	stress-induced premature senescence	biological_process	7	1	1020	8	15887	0.411971
GO:0032925	regulation of activin receptor signaling pathway	biological_process	9	1	1020	8	15887	0.411971
GO:0000942	condensed nuclear chromosome outer kinetochore	cellular_component	5	1	1020	8	15887	0.411971
GO:1990966	ATP generation from poly-ADP-D-ribose	biological_process	6	1	1020	8	15887	0.411971
GO:0051838	cytolysis by host of symbiont cells	biological_process	7	1	1020	8	15887	0.411971
GO:0060235	lens induction in camera-type eye	biological_process	5	1	1020	8	15887	0.411971
GO:0002314	germinal center B cell differentiation	biological_process	10	1	1020	8	15887	0.411971
GO:0035481	positive regulation of Notch signaling pathway involved in heart induction	biological_process	10	1	1020	8	15887	0.411971
GO:0061428	negative regulation of transcription from RNA polymerase II promoter in response to hypoxia	biological_process	12	1	1020	8	15887	0.411971
GO:0061088	regulation of sequestering of zinc ion	biological_process	6	1	1020	8	15887	0.411971
GO:1904031	positive regulation of cyclin-dependent protein kinase activity	biological_process	12	1	1020	8	15887	0.411971
GO:0003006	developmental process involved in reproduction	biological_process	4	1	1020	8	15887	0.411971
GO:0003274	endocardial cushion fusion	biological_process	6	1	1020	8	15887	0.411971
GO:0033005	positive regulation of mast cell activation	biological_process	8	1	1020	8	15887	0.411971
GO:0035751	regulation of lysosomal lumen pH	biological_process	13	1	1020	8	15887	0.411971
GO:0060763	mammary duct terminal end bud growth	biological_process	6	1	1020	8	15887	0.411971
GO:0003190	atrioventricular valve formation	biological_process	6	1	1020	8	15887	0.411971
GO:0072108	positive regulation of mesenchymal to epithelial transition involved in metanephros morphogenesis	biological_process	10	1	1020	8	15887	0.411971
GO:0002221	pattern recognition receptor signaling pathway	biological_process	7	1	1020	8	15887	0.411971
GO:0010815	bradykinin catabolic process	biological_process	7	1	1020	8	15887	0.411971
GO:0048790	maintenance of presynaptic active zone structure	biological_process	7	1	1020	8	15887	0.411971
GO:0046167	glycerol-3-phosphate biosynthetic process	biological_process	9	1	1020	8	15887	0.411971
GO:0006104	succinyl-CoA metabolic process	biological_process	8	1	1020	8	15887	0.411971
GO:0009298	GDP-mannose biosynthetic process	biological_process	10	1	1020	8	15887	0.411971
GO:0035473	lipase binding	molecular_function	6	1	1020	8	15887	0.411971
GO:0031579	membrane raft organization	biological_process	6	1	1020	8	15887	0.411971
GO:0070873	regulation of glycogen metabolic process	biological_process	10	1	1020	8	15887	0.411971
GO:0120222	regulation of blastocyst development	NA	NA	1	1020	8	15887	0.411971
GO:0036493	positive regulation of translation in response to endoplasmic reticulum stress	biological_process	12	1	1020	8	15887	0.411971
GO:0043242	negative regulation of protein-containing complex disassembly	biological_process	8	1	1020	8	15887	0.411971
GO:0061470	T follicular helper cell differentiation	biological_process	13	1	1020	8	15887	0.411971
GO:1903052	positive regulation of proteolysis involved in cellular protein catabolic process	biological_process	10	1	1020	8	15887	0.411971
GO:0032286	central nervous system myelin maintenance	biological_process	8	1	1020	8	15887	0.411971
GO:0048210	Golgi vesicle fusion to target membrane	biological_process	8	1	1020	8	15887	0.411971
GO:0043237	laminin-1 binding	molecular_function	6	1	1020	8	15887	0.411971
GO:0042382	paraspeckles	cellular_component	8	1	1020	8	15887	0.411971
GO:0006105	succinate metabolic process	biological_process	6	1	1020	8	15887	0.411971
GO:0071731	response to nitric oxide	biological_process	7	1	1020	8	15887	0.411971
GO:0050951	sensory perception of temperature stimulus	biological_process	7	1	1020	8	15887	0.411971
GO:0032392	DNA geometric change	biological_process	8	1	1020	8	15887	0.411971
GO:1990441	negative regulation of transcription from RNA polymerase II promoter in response to endoplasmic reticulum stress	biological_process	7	1	1020	8	15887	0.411971
GO:0071279	cellular response to cobalt ion	biological_process	8	1	1020	8	15887	0.411971
GO:0048022	negative regulation of melanin biosynthetic process	biological_process	9	1	1020	8	15887	0.411971
GO:0021892	cerebral cortex GABAergic interneuron differentiation	biological_process	9	1	1020	8	15887	0.411971
GO:0097016	L27 domain binding	molecular_function	6	1	1020	8	15887	0.411971
GO:0010626	negative regulation of Schwann cell proliferation	biological_process	12	1	1020	8	15887	0.411971
GO:0060841	venous blood vessel development	biological_process	6	1	1020	8	15887	0.411971
GO:0006360	transcription by RNA polymerase I	biological_process	9	1	1020	8	15887	0.411971
GO:0004966	galanin receptor activity	molecular_function	8	1	1020	8	15887	0.411971
GO:0035989	tendon development	biological_process	7	1	1020	8	15887	0.411971
GO:0090498	extrinsic component of Golgi membrane	cellular_component	6	1	1020	8	15887	0.411971
GO:0048808	male genitalia morphogenesis	biological_process	6	1	1020	8	15887	0.411971
GO:0044388	small protein activating enzyme binding	molecular_function	6	1	1020	8	15887	0.411971
GO:0120193	tight junction organization	biological_process	7	1	1020	8	15887	0.411971
GO:0060571	morphogenesis of an epithelial fold	biological_process	7	1	1020	8	15887	0.411971
GO:0060455	negative regulation of gastric acid secretion	biological_process	9	1	1020	8	15887	0.411971
GO:0050428	3'-phosphoadenosine 5'-phosphosulfate biosynthetic process	biological_process	12	1	1020	8	15887	0.411971
GO:0008449	N-acetylglucosamine-6-sulfatase activity	molecular_function	7	1	1020	8	15887	0.411971
GO:0035461	vitamin transmembrane transport	biological_process	7	1	1020	8	15887	0.411971
GO:1903208	negative regulation of hydrogen peroxide-induced neuron death	biological_process	10	1	1020	8	15887	0.411971
GO:0036294	cellular response to decreased oxygen levels	biological_process	7	1	1020	8	15887	0.411971
GO:0004955	prostaglandin receptor activity	molecular_function	9	1	1020	8	15887	0.411971
GO:0042766	nucleosome mobilization	biological_process	7	1	1020	8	15887	0.411971
GO:0002328	pro-B cell differentiation	biological_process	8	1	1020	8	15887	0.411971
GO:0110095	cellular detoxification of aldehyde	biological_process	5	1	1020	8	15887	0.411971
GO:1990785	response to water-immersion restraint stress	biological_process	6	1	1020	8	15887	0.411971
GO:0060965	negative regulation of gene silencing by miRNA	biological_process	11	1	1020	8	15887	0.411971
GO:1905323	telomerase holoenzyme complex assembly	biological_process	9	1	1020	8	15887	0.411971
GO:1990269	RNA polymerase II C-terminal domain phosphoserine binding	molecular_function	8	1	1020	8	15887	0.411971
GO:0002143	tRNA wobble position uridine thiolation	biological_process	15	1	1020	8	15887	0.411971
GO:1902731	negative regulation of chondrocyte proliferation	biological_process	8	1	1020	8	15887	0.411971
GO:0046546	development of primary male sexual characteristics	biological_process	6	1	1020	8	15887	0.411971
GO:0032447	protein urmylation	biological_process	11	1	1020	8	15887	0.411971
GO:2000546	positive regulation of endothelial cell chemotaxis to fibroblast growth factor	biological_process	10	1	1020	8	15887	0.411971
GO:0097061	dendritic spine organization	biological_process	6	1	1020	8	15887	0.411971
GO:0032620	interleukin-17 production	biological_process	5	1	1020	8	15887	0.411971
GO:0035814	negative regulation of renal sodium excretion	biological_process	9	1	1020	8	15887	0.411971
GO:0047238	glucuronosyl-N-acetylgalactosaminyl-proteoglycan 4-beta-N-acetylgalactosaminyltransferase activity	molecular_function	8	1	1020	8	15887	0.411971
GO:0042998	positive regulation of Golgi to plasma membrane protein transport	biological_process	10	1	1020	8	15887	0.411971
GO:0071673	positive regulation of smooth muscle cell chemotaxis	biological_process	10	1	1020	8	15887	0.411971
GO:0032606	type I interferon production	biological_process	5	1	1020	8	15887	0.411971
GO:0051048	negative regulation of secretion	biological_process	8	1	1020	8	15887	0.411971
GO:0001826	inner cell mass cell differentiation	biological_process	6	1	1020	8	15887	0.411971
GO:2000503	positive regulation of natural killer cell chemotaxis	biological_process	10	1	1020	8	15887	0.411971
GO:0042588	zymogen granule	cellular_component	9	1	1020	8	15887	0.411971
GO:0051464	positive regulation of cortisol secretion	biological_process	12	1	1020	8	15887	0.411971
GO:1990592	protein K69-linked ufmylation	biological_process	13	1	1020	8	15887	0.411971
GO:0033063	Rad51B-Rad51C-Rad51D-XRCC2 complex	cellular_component	5	1	1020	8	15887	0.411971
GO:0016035	zeta DNA polymerase complex	cellular_component	6	1	1020	8	15887	0.411971
GO:0097193	intrinsic apoptotic signaling pathway	biological_process	6	4	1020	51	15887	0.416045
GO:0043001	Golgi to plasma membrane protein transport	biological_process	10	4	1020	51	15887	0.416045
GO:0007588	excretion	biological_process	5	4	1020	51	15887	0.416045
GO:0002456	T cell mediated immunity	biological_process	7	2	1020	22	15887	0.417234
GO:0010917	negative regulation of mitochondrial membrane potential	biological_process	7	2	1020	22	15887	0.417234
GO:2000344	positive regulation of acrosome reaction	biological_process	8	2	1020	22	15887	0.417234
GO:0044214	spanning component of plasma membrane	cellular_component	7	2	1020	22	15887	0.417234
GO:0010390	histone monoubiquitination	biological_process	13	2	1020	22	15887	0.417234
GO:0043068	positive regulation of programmed cell death	biological_process	8	2	1020	22	15887	0.417234
GO:0140275	MIB complex	cellular_component	6	2	1020	22	15887	0.417234
GO:0019373	epoxygenase P450 pathway	biological_process	12	2	1020	22	15887	0.417234
GO:0006271	DNA strand elongation involved in DNA replication	biological_process	9	2	1020	22	15887	0.417234
GO:1990253	cellular response to leucine starvation	biological_process	10	2	1020	22	15887	0.417234
GO:0016024	CDP-diacylglycerol biosynthetic process	biological_process	11	2	1020	22	15887	0.417234
GO:0001401	SAM complex	cellular_component	6	2	1020	22	15887	0.417234
GO:0016045	detection of bacterium	biological_process	8	2	1020	22	15887	0.417234
GO:0043586	tongue development	biological_process	7	2	1020	22	15887	0.417234
GO:0034101	erythrocyte homeostasis	biological_process	5	2	1020	22	15887	0.417234
GO:1990756	ubiquitin ligase-substrate adaptor activity	molecular_function	6	2	1020	22	15887	0.417234
GO:0045047	protein targeting to ER	biological_process	12	2	1020	22	15887	0.417234
GO:0051974	negative regulation of telomerase activity	biological_process	8	2	1020	22	15887	0.417234
GO:0098789	pre-mRNA cleavage required for polyadenylation	biological_process	12	2	1020	22	15887	0.417234
GO:0016581	NuRD complex	cellular_component	8	2	1020	22	15887	0.417234
GO:0010737	protein kinase A signaling	biological_process	6	2	1020	22	15887	0.417234
GO:0019941	modification-dependent protein catabolic process	biological_process	9	2	1020	22	15887	0.417234
GO:1902494	catalytic complex	cellular_component	4	2	1020	22	15887	0.417234
GO:0016574	histone ubiquitination	biological_process	12	2	1020	22	15887	0.417234
GO:0010884	positive regulation of lipid storage	biological_process	6	2	1020	22	15887	0.417234
GO:2001214	positive regulation of vasculogenesis	biological_process	8	2	1020	22	15887	0.417234
GO:0051258	protein polymerization	biological_process	8	2	1020	22	15887	0.417234
GO:0021799	cerebral cortex radially oriented cell migration	biological_process	10	2	1020	22	15887	0.417234
GO:0060412	ventricular septum morphogenesis	biological_process	6	5	1020	66	15887	0.419001
GO:0061844	antimicrobial humoral immune response mediated by antimicrobial peptide	biological_process	7	6	1020	81	15887	0.420353
GO:0071333	cellular response to glucose stimulus	biological_process	10	8	1020	111	15887	0.420755
GO:0008408	3'-5' exonuclease activity	molecular_function	8	3	1020	37	15887	0.427219
GO:0046914	transition metal ion binding	molecular_function	7	3	1020	37	15887	0.427219
GO:0046928	regulation of neurotransmitter secretion	biological_process	6	3	1020	37	15887	0.427219
GO:0004707	MAP kinase activity	molecular_function	9	3	1020	37	15887	0.427219
GO:0006637	acyl-CoA metabolic process	biological_process	7	4	1020	52	15887	0.43071
GO:0031334	positive regulation of protein-containing complex assembly	biological_process	7	7	1020	97	15887	0.431479
GO:0015914	phospholipid transport	biological_process	8	6	1020	82	15887	0.431965
GO:0004867	serine-type endopeptidase inhibitor activity	molecular_function	8	10	1020	143	15887	0.437265
GO:0010469	regulation of signaling receptor activity	biological_process	8	2	1020	23	15887	0.439761
GO:0006978	DNA damage response, signal transduction by p53 class mediator resulting in transcription of p21 class mediator	biological_process	9	2	1020	23	15887	0.439761
GO:0021904	dorsal/ventral neural tube patterning	biological_process	7	2	1020	23	15887	0.439761
GO:0010666	positive regulation of cardiac muscle cell apoptotic process	biological_process	12	2	1020	23	15887	0.439761
GO:0010867	positive regulation of triglyceride biosynthetic process	biological_process	9	2	1020	23	15887	0.439761
GO:0070933	histone H4 deacetylation	biological_process	12	2	1020	23	15887	0.439761
GO:0001945	lymph vessel development	biological_process	5	2	1020	23	15887	0.439761
GO:0038183	bile acid signaling pathway	biological_process	5	2	1020	23	15887	0.439761
GO:0042043	neurexin family protein binding	molecular_function	6	2	1020	23	15887	0.439761
GO:0009303	rRNA transcription	biological_process	10	2	1020	23	15887	0.439761
GO:0004115	3',5'-cyclic-AMP phosphodiesterase activity	molecular_function	10	2	1020	23	15887	0.439761
GO:0033558	protein deacetylase activity	molecular_function	6	2	1020	23	15887	0.439761
GO:0002690	positive regulation of leukocyte chemotaxis	biological_process	8	2	1020	23	15887	0.439761
GO:0046940	nucleoside monophosphate phosphorylation	biological_process	9	2	1020	23	15887	0.439761
GO:0071682	endocytic vesicle lumen	cellular_component	7	2	1020	23	15887	0.439761
GO:0032233	positive regulation of actin filament bundle assembly	biological_process	7	2	1020	23	15887	0.439761
GO:0031274	positive regulation of pseudopodium assembly	biological_process	11	2	1020	23	15887	0.439761
GO:1990023	mitotic spindle midzone	cellular_component	7	2	1020	23	15887	0.439761
GO:0022010	central nervous system myelination	biological_process	7	2	1020	23	15887	0.439761
GO:0071565	nBAF complex	cellular_component	8	2	1020	23	15887	0.439761
GO:0007254	JNK cascade	biological_process	13	6	1020	83	15887	0.443537
GO:0045786	negative regulation of cell cycle	biological_process	7	6	1020	83	15887	0.443537
GO:0002756	MyD88-independent toll-like receptor signaling pathway	biological_process	9	3	1020	38	15887	0.44452
GO:0034364	high-density lipoprotein particle	cellular_component	5	3	1020	38	15887	0.44452
GO:0070987	error-free translesion synthesis	biological_process	11	3	1020	38	15887	0.44452
GO:0048513	animal organ development	biological_process	5	3	1020	38	15887	0.44452
GO:0060425	lung morphogenesis	biological_process	6	3	1020	38	15887	0.44452
GO:0000422	autophagy of mitochondrion	biological_process	7	5	1020	68	15887	0.444691
GO:0007369	gastrulation	biological_process	6	5	1020	68	15887	0.444691
GO:0001707	mesoderm formation	biological_process	6	5	1020	68	15887	0.444691
GO:0090200	positive regulation of release of cytochrome c from mitochondria	biological_process	10	4	1020	53	15887	0.445274
GO:0030104	water homeostasis	biological_process	7	1	1020	9	15887	0.449743
GO:0004844	uracil DNA N-glycosylase activity	molecular_function	9	1	1020	9	15887	0.449743
GO:0016783	sulfurtransferase activity	molecular_function	6	1	1020	9	15887	0.449743
GO:0048524	positive regulation of viral process	biological_process	7	1	1020	9	15887	0.449743
GO:0060219	camera-type eye photoreceptor cell differentiation	biological_process	9	1	1020	9	15887	0.449743
GO:0005502	11-cis retinal binding	molecular_function	8	1	1020	9	15887	0.449743
GO:1990051	activation of protein kinase C activity	biological_process	13	1	1020	9	15887	0.449743
GO:2000052	positive regulation of non-canonical Wnt signaling pathway	biological_process	10	1	1020	9	15887	0.449743
GO:0070988	demethylation	biological_process	4	1	1020	9	15887	0.449743
GO:0004656	procollagen-proline 4-dioxygenase activity	molecular_function	9	1	1020	9	15887	0.449743
GO:0060591	chondroblast differentiation	biological_process	6	1	1020	9	15887	0.449743
GO:1902074	response to salt	biological_process	5	1	1020	9	15887	0.449743
GO:0030297	transmembrane receptor protein tyrosine kinase activator activity	molecular_function	9	1	1020	9	15887	0.449743
GO:0050510	N-acetylgalactosaminyl-proteoglycan 3-beta-glucuronosyltransferase activity	molecular_function	8	1	1020	9	15887	0.449743
GO:0070296	sarcoplasmic reticulum calcium ion transport	biological_process	11	1	1020	9	15887	0.449743
GO:0001554	luteolysis	biological_process	5	1	1020	9	15887	0.449743
GO:0008467	[heparan sulfate]-glucosamine 3-sulfotransferase 1 activity	molecular_function	8	1	1020	9	15887	0.449743
GO:0047961	glycine N-acyltransferase activity	molecular_function	8	1	1020	9	15887	0.449743
GO:0030204	chondroitin sulfate metabolic process	biological_process	6	1	1020	9	15887	0.449743
GO:0050672	negative regulation of lymphocyte proliferation	biological_process	10	1	1020	9	15887	0.449743
GO:0015288	porin activity	molecular_function	8	1	1020	9	15887	0.449743
GO:0004897	ciliary neurotrophic factor receptor activity	molecular_function	7	1	1020	9	15887	0.449743
GO:1902749	regulation of cell cycle G2/M phase transition	biological_process	9	1	1020	9	15887	0.449743
GO:0050904	diapedesis	biological_process	5	1	1020	9	15887	0.449743
GO:1903595	positive regulation of histamine secretion by mast cell	biological_process	9	1	1020	9	15887	0.449743
GO:0060137	maternal process involved in parturition	biological_process	5	1	1020	9	15887	0.449743
GO:0032388	positive regulation of intracellular transport	biological_process	8	1	1020	9	15887	0.449743
GO:0015747	urate transport	biological_process	9	1	1020	9	15887	0.449743
GO:0021853	cerebral cortex GABAergic interneuron migration	biological_process	12	1	1020	9	15887	0.449743
GO:0008211	glucocorticoid metabolic process	biological_process	7	1	1020	9	15887	0.449743
GO:0051970	negative regulation of transmission of nerve impulse	biological_process	8	1	1020	9	15887	0.449743
GO:0007198	adenylate cyclase-inhibiting serotonin receptor signaling pathway	biological_process	9	1	1020	9	15887	0.449743
GO:0045876	positive regulation of sister chromatid cohesion	biological_process	10	1	1020	9	15887	0.449743
GO:1990357	terminal web	cellular_component	9	1	1020	9	15887	0.449743
GO:0048050	post-embryonic eye morphogenesis	biological_process	7	1	1020	9	15887	0.449743
GO:0016447	somatic recombination of immunoglobulin gene segments	biological_process	6	1	1020	9	15887	0.449743
GO:0017085	response to insecticide	biological_process	6	1	1020	9	15887	0.449743
GO:0019348	dolichol metabolic process	biological_process	7	1	1020	9	15887	0.449743
GO:0099505	regulation of presynaptic membrane potential	biological_process	6	1	1020	9	15887	0.449743
GO:0002188	translation reinitiation	biological_process	7	1	1020	9	15887	0.449743
GO:0070370	cellular heat acclimation	biological_process	7	1	1020	9	15887	0.449743
GO:0120044	stereocilium base	cellular_component	4	1	1020	9	15887	0.449743
GO:0015136	sialic acid transmembrane transporter activity	molecular_function	7	1	1020	9	15887	0.449743
GO:0005726	perichromatin fibrils	cellular_component	7	1	1020	9	15887	0.449743
GO:0070849	response to epidermal growth factor	biological_process	5	1	1020	9	15887	0.449743
GO:2000611	positive regulation of thyroid hormone generation	biological_process	8	1	1020	9	15887	0.449743
GO:0015739	sialic acid transport	biological_process	10	1	1020	9	15887	0.449743
GO:0035523	protein K29-linked deubiquitination	biological_process	10	1	1020	9	15887	0.449743
GO:0008310	single-stranded DNA 3'-5' exodeoxyribonuclease activity	molecular_function	10	1	1020	9	15887	0.449743
GO:0097025	MPP7-DLG1-LIN7 complex	cellular_component	6	1	1020	9	15887	0.449743
GO:0060266	negative regulation of respiratory burst involved in inflammatory response	biological_process	8	1	1020	9	15887	0.449743
GO:0032057	negative regulation of translational initiation in response to stress	biological_process	12	1	1020	9	15887	0.449743
GO:0071504	cellular response to heparin	biological_process	7	1	1020	9	15887	0.449743
GO:0071466	cellular response to xenobiotic stimulus	biological_process	6	1	1020	9	15887	0.449743
GO:0003958	NADPH-hemoprotein reductase activity	molecular_function	7	1	1020	9	15887	0.449743
GO:0045607	regulation of inner ear auditory receptor cell differentiation	biological_process	9	1	1020	9	15887	0.449743
GO:0005048	signal sequence binding	molecular_function	6	1	1020	9	15887	0.449743
GO:0001003	RNA polymerase III type 2 promoter sequence-specific DNA binding	molecular_function	10	1	1020	9	15887	0.449743
GO:0061180	mammary gland epithelium development	biological_process	7	1	1020	9	15887	0.449743
GO:0003161	cardiac conduction system development	biological_process	9	1	1020	9	15887	0.449743
GO:0050694	galactose 3-O-sulfotransferase activity	molecular_function	7	1	1020	9	15887	0.449743
GO:0090669	telomerase RNA stabilization	biological_process	11	1	1020	9	15887	0.449743
GO:0016684	oxidoreductase activity, acting on peroxide as acceptor	molecular_function	5	1	1020	9	15887	0.449743
GO:0045906	negative regulation of vasoconstriction	biological_process	10	1	1020	9	15887	0.449743
GO:0060842	arterial endothelial cell differentiation	biological_process	9	1	1020	9	15887	0.449743
GO:1990234	transferase complex	cellular_component	5	1	1020	9	15887	0.449743
GO:0035522	monoubiquitinated histone H2A deubiquitination	biological_process	12	1	1020	9	15887	0.449743
GO:0043398	HLH domain binding	molecular_function	6	1	1020	9	15887	0.449743
GO:0032909	regulation of transforming growth factor beta2 production	biological_process	8	1	1020	9	15887	0.449743
GO:0043120	tumor necrosis factor binding	molecular_function	6	1	1020	9	15887	0.449743
GO:0002043	blood vessel endothelial cell proliferation involved in sprouting angiogenesis	biological_process	6	1	1020	9	15887	0.449743
GO:0000389	mRNA 3'-splice site recognition	biological_process	10	1	1020	9	15887	0.449743
GO:1902083	negative regulation of peptidyl-cysteine S-nitrosylation	biological_process	10	1	1020	9	15887	0.449743
GO:0030478	actin cap	cellular_component	6	1	1020	9	15887	0.449743
GO:0045026	plasma membrane fusion	biological_process	7	1	1020	9	15887	0.449743
GO:0032264	IMP salvage	biological_process	13	1	1020	9	15887	0.449743
GO:0002725	negative regulation of T cell cytokine production	biological_process	11	1	1020	9	15887	0.449743
GO:0043243	positive regulation of protein-containing complex disassembly	biological_process	8	1	1020	9	15887	0.449743
GO:0048170	positive regulation of long-term neuronal synaptic plasticity	biological_process	12	1	1020	9	15887	0.449743
GO:0071800	podosome assembly	biological_process	7	1	1020	9	15887	0.449743
GO:0034502	protein localization to chromosome	biological_process	8	1	1020	9	15887	0.449743
GO:0060729	intestinal epithelial structure maintenance	biological_process	10	1	1020	9	15887	0.449743
GO:0050793	regulation of developmental process	biological_process	5	1	1020	9	15887	0.449743
GO:0030620	U2 snRNA binding	molecular_function	8	1	1020	9	15887	0.449743
GO:0048864	stem cell development	biological_process	6	1	1020	9	15887	0.449743
GO:0015734	taurine transport	biological_process	10	1	1020	9	15887	0.449743
GO:0070140	SUMO-specific isopeptidase activity	molecular_function	10	1	1020	9	15887	0.449743
GO:1902807	negative regulation of cell cycle G1/S phase transition	biological_process	10	1	1020	9	15887	0.449743
GO:0005105	type 1 fibroblast growth factor receptor binding	molecular_function	8	1	1020	9	15887	0.449743
GO:0006907	pinocytosis	biological_process	8	1	1020	9	15887	0.449743
GO:0016671	oxidoreductase activity, acting on a sulfur group of donors, disulfide as acceptor	molecular_function	6	1	1020	9	15887	0.449743
GO:0070898	RNA polymerase III preinitiation complex assembly	biological_process	10	1	1020	9	15887	0.449743
GO:1990604	IRE1-TRAF2-ASK1 complex	cellular_component	7	1	1020	9	15887	0.449743
GO:0005372	water transmembrane transporter activity	molecular_function	6	1	1020	9	15887	0.449743
GO:0071409	cellular response to cycloheximide	biological_process	7	1	1020	9	15887	0.449743
GO:0008379	thioredoxin peroxidase activity	molecular_function	5	1	1020	9	15887	0.449743
GO:0035061	interchromatin granule	cellular_component	8	1	1020	9	15887	0.449743
GO:0035720	intraciliary anterograde transport	biological_process	8	1	1020	9	15887	0.449743
GO:0010664	negative regulation of striated muscle cell apoptotic process	biological_process	11	1	1020	9	15887	0.449743
GO:0060528	secretory columnal luminar epithelial cell differentiation involved in prostate glandular acinus development	biological_process	9	1	1020	9	15887	0.449743
GO:1902110	positive regulation of mitochondrial membrane permeability involved in apoptotic process	biological_process	9	1	1020	9	15887	0.449743
GO:0046456	icosanoid biosynthetic process	biological_process	9	1	1020	9	15887	0.449743
GO:0051823	regulation of synapse structural plasticity	biological_process	8	1	1020	9	15887	0.449743
GO:0006450	regulation of translational fidelity	biological_process	5	1	1020	9	15887	0.449743
GO:0032483	regulation of Rab protein signal transduction	biological_process	11	1	1020	9	15887	0.449743
GO:0031698	beta-2 adrenergic receptor binding	molecular_function	8	1	1020	9	15887	0.449743
GO:0035610	protein side chain deglutamylation	biological_process	12	1	1020	9	15887	0.449743
GO:0072284	metanephric S-shaped body morphogenesis	biological_process	6	1	1020	9	15887	0.449743
GO:0097720	calcineurin-mediated signaling	biological_process	8	1	1020	9	15887	0.449743
GO:0035517	PR-DUB complex	cellular_component	5	1	1020	9	15887	0.449743
GO:0010792	DNA double-strand break processing involved in repair via single-strand annealing	biological_process	9	1	1020	9	15887	0.449743
GO:0001002	RNA polymerase III type 1 promoter sequence-specific DNA binding	molecular_function	10	1	1020	9	15887	0.449743
GO:0070915	lysophosphatidic acid receptor activity	molecular_function	8	1	1020	9	15887	0.449743
GO:0098957	anterograde axonal transport of mitochondrion	biological_process	12	1	1020	9	15887	0.449743
GO:0099612	protein localization to axon	biological_process	6	1	1020	9	15887	0.449743
GO:0000403	Y-form DNA binding	molecular_function	8	1	1020	9	15887	0.449743
GO:0061734	parkin-mediated stimulation of mitophagy in response to mitochondrial depolarization	biological_process	13	1	1020	9	15887	0.449743
GO:0097035	regulation of membrane lipid distribution	biological_process	6	1	1020	9	15887	0.449743
GO:0043125	ErbB-3 class receptor binding	molecular_function	6	1	1020	9	15887	0.449743
GO:0097300	programmed necrotic cell death	biological_process	6	1	1020	9	15887	0.449743
GO:0003176	aortic valve development	biological_process	7	1	1020	9	15887	0.449743
GO:0003266	regulation of secondary heart field cardioblast proliferation	biological_process	10	1	1020	9	15887	0.449743
GO:1902512	positive regulation of apoptotic DNA fragmentation	biological_process	8	1	1020	9	15887	0.449743
GO:0001851	complement component C3b binding	molecular_function	6	1	1020	9	15887	0.449743
GO:0070857	regulation of bile acid biosynthetic process	biological_process	8	1	1020	9	15887	0.449743
GO:0021615	glossopharyngeal nerve morphogenesis	biological_process	6	1	1020	9	15887	0.449743
GO:0001733	galactosylceramide sulfotransferase activity	molecular_function	8	1	1020	9	15887	0.449743
GO:1902219	negative regulation of intrinsic apoptotic signaling pathway in response to osmotic stress	biological_process	10	1	1020	9	15887	0.449743
GO:0086073	bundle of His cell-Purkinje myocyte adhesion involved in cell communication	biological_process	7	1	1020	9	15887	0.449743
GO:0036006	cellular response to macrophage colony-stimulating factor stimulus	biological_process	8	1	1020	9	15887	0.449743
GO:1990049	retrograde neuronal dense core vesicle transport	biological_process	12	1	1020	9	15887	0.449743
GO:0048194	Golgi vesicle budding	biological_process	8	1	1020	9	15887	0.449743
GO:0060956	endocardial cell differentiation	biological_process	8	1	1020	9	15887	0.449743
GO:0044571	[2Fe-2S] cluster assembly	biological_process	7	1	1020	9	15887	0.449743
GO:0019800	peptide cross-linking via chondroitin 4-sulfate glycosaminoglycan	biological_process	10	1	1020	9	15887	0.449743
GO:0004957	prostaglandin E receptor activity	molecular_function	10	1	1020	9	15887	0.449743
GO:0033591	response to L-ascorbic acid	biological_process	6	1	1020	9	15887	0.449743
GO:2000741	positive regulation of mesenchymal stem cell differentiation	biological_process	9	1	1020	9	15887	0.449743
GO:0004982	N-formyl peptide receptor activity	molecular_function	7	1	1020	9	15887	0.449743
GO:0098684	photoreceptor ribbon synapse	cellular_component	5	1	1020	9	15887	0.449743
GO:0035511	oxidative DNA demethylation	biological_process	6	1	1020	9	15887	0.449743
GO:0008308	voltage-gated anion channel activity	molecular_function	10	1	1020	9	15887	0.449743
GO:0010936	negative regulation of macrophage cytokine production	biological_process	9	1	1020	9	15887	0.449743
GO:0003219	cardiac right ventricle formation	biological_process	7	1	1020	9	15887	0.449743
GO:1900028	negative regulation of ruffle assembly	biological_process	10	1	1020	9	15887	0.449743
GO:0030124	AP-4 adaptor complex	cellular_component	7	1	1020	9	15887	0.449743
GO:1904288	BAT3 complex binding	molecular_function	5	1	1020	9	15887	0.449743
GO:0008626	granzyme-mediated apoptotic signaling pathway	biological_process	6	1	1020	9	15887	0.449743
GO:0060012	synaptic transmission, glycinergic	biological_process	10	1	1020	9	15887	0.449743
GO:0045617	negative regulation of keratinocyte differentiation	biological_process	10	1	1020	9	15887	0.449743
GO:0097681	double-strand break repair via alternative nonhomologous end joining	biological_process	11	1	1020	9	15887	0.449743
GO:0038145	macrophage colony-stimulating factor signaling pathway	biological_process	7	1	1020	9	15887	0.449743
GO:0010193	response to ozone	biological_process	7	1	1020	9	15887	0.449743
GO:0030593	neutrophil chemotaxis	biological_process	7	8	1020	114	15887	0.450415
GO:0042475	odontogenesis of dentin-containing tooth	biological_process	7	7	1020	99	15887	0.45271
GO:0032515	negative regulation of phosphoprotein phosphatase activity	biological_process	12	7	1020	99	15887	0.45271
GO:0008094	DNA-dependent ATPase activity	molecular_function	11	5	1020	69	15887	0.457432
GO:0045540	regulation of cholesterol biosynthetic process	biological_process	10	5	1020	69	15887	0.457432
GO:0006446	regulation of translational initiation	biological_process	10	4	1020	54	15887	0.459721
GO:0006506	GPI anchor biosynthetic process	biological_process	10	4	1020	54	15887	0.459721
GO:0042759	long-chain fatty acid biosynthetic process	biological_process	11	3	1020	39	15887	0.46161
GO:0016018	cyclosporin A binding	molecular_function	5	3	1020	39	15887	0.46161
GO:0004709	MAP kinase kinase kinase activity	molecular_function	9	3	1020	39	15887	0.46161
GO:0030101	natural killer cell activation	biological_process	7	3	1020	39	15887	0.46161
GO:0006607	NLS-bearing protein import into nucleus	biological_process	12	3	1020	39	15887	0.46161
GO:0019825	oxygen binding	molecular_function	5	3	1020	39	15887	0.46161
GO:0001946	lymphangiogenesis	biological_process	5	2	1020	24	15887	0.461801
GO:0046426	negative regulation of receptor signaling pathway via JAK-STAT	biological_process	10	2	1020	24	15887	0.461801
GO:0045745	positive regulation of G protein-coupled receptor signaling pathway	biological_process	9	2	1020	24	15887	0.461801
GO:0005751	mitochondrial respiratory chain complex IV	cellular_component	6	2	1020	24	15887	0.461801
GO:0036499	PERK-mediated unfolded protein response	biological_process	6	2	1020	24	15887	0.461801
GO:0021895	cerebral cortex neuron differentiation	biological_process	8	2	1020	24	15887	0.461801
GO:0009101	glycoprotein biosynthetic process	biological_process	8	2	1020	24	15887	0.461801
GO:0005003	ephrin receptor activity	molecular_function	10	2	1020	24	15887	0.461801
GO:0003841	1-acylglycerol-3-phosphate O-acyltransferase activity	molecular_function	9	2	1020	24	15887	0.461801
GO:1905564	positive regulation of vascular endothelial cell proliferation	biological_process	10	2	1020	24	15887	0.461801
GO:0060317	cardiac epithelial to mesenchymal transition	biological_process	8	2	1020	24	15887	0.461801
GO:0004198	calcium-dependent cysteine-type endopeptidase activity	molecular_function	9	2	1020	24	15887	0.461801
GO:0005005	transmembrane-ephrin receptor activity	molecular_function	11	2	1020	24	15887	0.461801
GO:0007625	grooming behavior	biological_process	4	2	1020	24	15887	0.461801
GO:0019068	virion assembly	biological_process	7	2	1020	24	15887	0.461801
GO:0016580	Sin3 complex	cellular_component	9	2	1020	24	15887	0.461801
GO:0003197	endocardial cushion development	biological_process	7	2	1020	24	15887	0.461801
GO:0031529	ruffle organization	biological_process	7	2	1020	24	15887	0.461801
GO:0030007	cellular potassium ion homeostasis	biological_process	11	2	1020	24	15887	0.461801
GO:0070936	protein K48-linked ubiquitination	biological_process	13	7	1020	101	15887	0.473781
GO:0007131	reciprocal meiotic recombination	biological_process	10	4	1020	55	15887	0.474037
GO:0003180	aortic valve morphogenesis	biological_process	6	4	1020	55	15887	0.474037
GO:0007140	male meiotic nuclear division	biological_process	5	3	1020	40	15887	0.478467
GO:0035329	hippo signaling	biological_process	6	3	1020	40	15887	0.478467
GO:0043113	receptor clustering	biological_process	6	3	1020	40	15887	0.478467
GO:0000902	cell morphogenesis	biological_process	6	10	1020	148	15887	0.480879
GO:1990090	cellular response to nerve growth factor stimulus	biological_process	8	5	1020	71	15887	0.482653
GO:0034450	ubiquitin-ubiquitin ligase activity	molecular_function	8	2	1020	25	15887	0.483323
GO:0045190	isotype switching	biological_process	8	2	1020	25	15887	0.483323
GO:0017116	single-stranded DNA helicase activity	molecular_function	12	2	1020	25	15887	0.483323
GO:0046949	fatty-acyl-CoA biosynthetic process	biological_process	9	2	1020	25	15887	0.483323
GO:0005229	intracellular calcium activated chloride channel activity	molecular_function	7	2	1020	25	15887	0.483323
GO:0010248	establishment or maintenance of transmembrane electrochemical gradient	biological_process	8	2	1020	25	15887	0.483323
GO:0030850	prostate gland development	biological_process	6	2	1020	25	15887	0.483323
GO:0045842	positive regulation of mitotic metaphase/anaphase transition	biological_process	12	2	1020	25	15887	0.483323
GO:0031462	Cul2-RING ubiquitin ligase complex	cellular_component	7	2	1020	25	15887	0.483323
GO:2000060	positive regulation of ubiquitin-dependent protein catabolic process	biological_process	11	2	1020	25	15887	0.483323
GO:0031083	BLOC-1 complex	cellular_component	5	2	1020	25	15887	0.483323
GO:0061029	eyelid development in camera-type eye	biological_process	5	2	1020	25	15887	0.483323
GO:0010763	positive regulation of fibroblast migration	biological_process	9	2	1020	25	15887	0.483323
GO:0033276	transcription factor TFTC complex	cellular_component	8	2	1020	25	15887	0.483323
GO:0036376	sodium ion export across plasma membrane	biological_process	11	2	1020	25	15887	0.483323
GO:0005548	phospholipid transporter activity	molecular_function	5	2	1020	25	15887	0.483323
GO:0005779	integral component of peroxisomal membrane	cellular_component	7	2	1020	25	15887	0.483323
GO:0006473	protein acetylation	biological_process	10	2	1020	25	15887	0.483323
GO:0019213	deacetylase activity	molecular_function	5	2	1020	25	15887	0.483323
GO:2000679	positive regulation of transcription regulatory region DNA binding	biological_process	8	2	1020	25	15887	0.483323
GO:0051290	protein heterotetramerization	biological_process	9	2	1020	25	15887	0.483323
GO:0016254	preassembly of GPI anchor in ER membrane	biological_process	9	2	1020	25	15887	0.483323
GO:0051896	regulation of protein kinase B signaling	biological_process	9	2	1020	25	15887	0.483323
GO:0007266	Rho protein signal transduction	biological_process	8	7	1020	102	15887	0.48424
GO:0030317	flagellated sperm motility	biological_process	5	9	1020	133	15887	0.484988
GO:0003272	endocardial cushion formation	biological_process	5	1	1020	10	15887	0.485092
GO:0002090	regulation of receptor internalization	biological_process	7	1	1020	10	15887	0.485092
GO:0031415	NatA complex	cellular_component	7	1	1020	10	15887	0.485092
GO:0045578	negative regulation of B cell differentiation	biological_process	10	1	1020	10	15887	0.485092
GO:0071569	protein ufmylation	biological_process	11	1	1020	10	15887	0.485092
GO:0015450	P-P-bond-hydrolysis-driven protein transmembrane transporter activity	molecular_function	7	1	1020	10	15887	0.485092
GO:0004090	carbonyl reductase (NADPH) activity	molecular_function	7	1	1020	10	15887	0.485092
GO:0035650	AP-1 adaptor complex binding	molecular_function	5	1	1020	10	15887	0.485092
GO:0016199	axon midline choice point recognition	biological_process	7	1	1020	10	15887	0.485092
GO:0043045	DNA methylation involved in embryo development	biological_process	11	1	1020	10	15887	0.485092
GO:0021889	olfactory bulb interneuron differentiation	biological_process	9	1	1020	10	15887	0.485092
GO:0033631	cell-cell adhesion mediated by integrin	biological_process	6	1	1020	10	15887	0.485092
GO:0003211	cardiac ventricle formation	biological_process	6	1	1020	10	15887	0.485092
GO:0006166	purine ribonucleoside salvage	biological_process	9	1	1020	10	15887	0.485092
GO:0035694	mitochondrial protein catabolic process	biological_process	9	1	1020	10	15887	0.485092
GO:1903238	positive regulation of leukocyte tethering or rolling	biological_process	9	1	1020	10	15887	0.485092
GO:0034315	regulation of Arp2/3 complex-mediated actin nucleation	biological_process	10	1	1020	10	15887	0.485092
GO:0031622	positive regulation of fever generation	biological_process	11	1	1020	10	15887	0.485092
GO:0032354	response to follicle-stimulating hormone	biological_process	7	1	1020	10	15887	0.485092
GO:0043067	regulation of programmed cell death	biological_process	7	1	1020	10	15887	0.485092
GO:0004427	inorganic diphosphatase activity	molecular_function	8	1	1020	10	15887	0.485092
GO:0098919	structural constituent of postsynaptic density	molecular_function	6	1	1020	10	15887	0.485092
GO:0120146	sulfatide binding	molecular_function	6	1	1020	10	15887	0.485092
GO:1990752	microtubule end	cellular_component	6	1	1020	10	15887	0.485092
GO:0097237	cellular response to toxic substance	biological_process	6	1	1020	10	15887	0.485092
GO:0007006	mitochondrial membrane organization	biological_process	7	1	1020	10	15887	0.485092
GO:0051081	nuclear envelope disassembly	biological_process	7	1	1020	10	15887	0.485092
GO:0002023	reduction of food intake in response to dietary excess	biological_process	6	1	1020	10	15887	0.485092
GO:0097187	dentinogenesis	biological_process	8	1	1020	10	15887	0.485092
GO:1903348	positive regulation of bicellular tight junction assembly	biological_process	8	1	1020	10	15887	0.485092
GO:0036155	acylglycerol acyl-chain remodeling	biological_process	9	1	1020	10	15887	0.485092
GO:1902231	positive regulation of intrinsic apoptotic signaling pathway in response to DNA damage	biological_process	9	1	1020	10	15887	0.485092
GO:0003150	muscular septum morphogenesis	biological_process	7	1	1020	10	15887	0.485092
GO:1903721	positive regulation of I-kappaB phosphorylation	biological_process	11	1	1020	10	15887	0.485092
GO:0060385	axonogenesis involved in innervation	biological_process	10	1	1020	10	15887	0.485092
GO:0005784	Sec61 translocon complex	cellular_component	8	1	1020	10	15887	0.485092
GO:1903232	melanosome assembly	biological_process	9	1	1020	10	15887	0.485092
GO:0072540	T-helper 17 cell lineage commitment	biological_process	10	1	1020	10	15887	0.485092
GO:0032510	endosome to lysosome transport via multivesicular body sorting pathway	biological_process	9	1	1020	10	15887	0.485092
GO:0036042	long-chain fatty acyl-CoA binding	molecular_function	10	1	1020	10	15887	0.485092
GO:0072177	mesonephric duct development	biological_process	7	1	1020	10	15887	0.485092
GO:0051964	negative regulation of synapse assembly	biological_process	8	1	1020	10	15887	0.485092
GO:0051861	glycolipid binding	molecular_function	5	1	1020	10	15887	0.485092
GO:1990635	proximal dendrite	cellular_component	7	1	1020	10	15887	0.485092
GO:0061087	positive regulation of histone H3-K27 methylation	biological_process	12	1	1020	10	15887	0.485092
GO:0010822	positive regulation of mitochondrion organization	biological_process	9	1	1020	10	15887	0.485092
[truncated: 3,358 more rows]
