# Supplementary material for: Whole-Transcriptome Sequencing of Knee Joint Cartilage from Kashin–Beck Disease and Osteoarthritis Patients
Source: Int J Mol Sci. 2024 Apr 15;25(8):4348. doi: 10.3390/ijms25084348 (PMC11049856; doi:10.3390/ijms25084348)
Supplement: Supplementary file 1 [file ijms-25-04348-s001.zip › Supplementary Table S6_KBDVSOA_KEGG_enrichment_lncRNA.xlsx]

## Sheet: Sheet1
Supplementary Table S6. KEGG enrichment analysis results of target genes of differentially expressed lncRNA between KBD and OA
pathway_id	pathway_name	S gene number	TS gene number	B gene number	TB gene number	pvalue
ko04520	Adherens junction	10	393	126	6608	0.215725
ko04610	Complement and coagulation cascades	9	393	118	6608	0.26794
ko05213	Endometrial cancer	8	393	103	6608	0.268582
ko04962	Vasopressin-regulated water reabsorption	6	393	76	6608	0.297317
ko00100	Steroid biosynthesis	3	393	35	6608	0.34601
ko03460	Fanconi anemia pathway	6	393	81	6608	0.350702
ko05216	Thyroid cancer	5	393	66	6608	0.355907
ko00061	Fatty acid biosynthesis	2	393	23	6608	0.401124
ko03015	mRNA surveillance pathway	10	393	151	6608	0.409768
ko05020	Prion diseases	4	393	55	6608	0.41526
ko03410	Base excision repair	4	393	57	6608	0.442368
ko00640	Propanoate metabolism	4	393	59	6608	0.469092
ko00563	Glycosylphosphatidylinositol (GPI)-anchor biosynthesis	3	393	43	6608	0.475562
ko05100	Bacterial invasion of epithelial cells	8	393	129	6608	0.504287
ko03060	Protein export	3	393	46	6608	0.521169
ko01040	Biosynthesis of unsaturated fatty acids	3	393	46	6608	0.521169
ko00440	Phosphonate and phosphinate metabolism	1	393	12	6608	0.521173
ko00750	Vitamin B6 metabolism	1	393	12	6608	0.521173
ko04330	Notch signaling pathway	5	393	83	6608	0.554388
ko04390	Hippo signaling pathway	15	393	256	6608	0.563436
ko04740	Olfactory transduction	23	393	395	6608	0.575432
ko00760	Nicotinate and nicotinamide metabolism	3	393	51	6608	0.592085
ko00450	Selenocompound metabolism	2	393	33	6608	0.592564
ko04122	Sulfur relay system	1	393	15	6608	0.601774
ko03440	Homologous recombination	4	393	71	6608	0.616872
ko05412	Arrhythmogenic right ventricular cardiomyopathy (ARVC)	7	393	127	6608	0.637552
ko04977	Vitamin digestion and absorption	2	393	36	6608	0.640385
ko00532	Glycosaminoglycan biosynthesis - chondroitin sulfate / dermatan sulfate	2	393	36	6608	0.640385
ko04640	Hematopoietic cell lineage	8	393	146	6608	0.646528
ko00072	Synthesis and degradation of ketone bodies	1	393	17	6608	0.647838
ko04976	Bile secretion	6	393	111	6608	0.654441
ko00410	beta-Alanine metabolism	3	393	56	6608	0.655863
ko04012	ErbB signaling pathway	8	393	148	6608	0.661672
ko04918	Thyroid hormone synthesis	7	393	130	6608	0.661906
ko00920	Sulfur metabolism	1	393	18	6608	0.668836
ko04927	Cortisol synthesis and secretion	6	393	113	6608	0.671493
ko05150	Staphylococcus aureus infection	4	393	77	6608	0.68039
ko00130	Ubiquinone and other terpenoid-quinone biosynthesis	1	393	19	6608	0.688585
ko05030	Cocaine addiction	4	393	78	6608	0.690229
ko04215	Apoptosis - multiple species	3	393	59	6608	0.690544
ko00240	Pyrimidine metabolism	5	393	97	6608	0.692515
ko00983	Drug metabolism - other enzymes	5	393	97	6608	0.692515
ko04928	Parathyroid hormone synthesis, secretion and action	10	393	189	6608	0.695516
ko00534	Glycosaminoglycan biosynthesis - heparan sulfate / heparin	2	393	40	6608	0.697137
ko04152	AMPK signaling pathway	11	393	209	6608	0.707211
ko05220	Chronic myeloid leukemia	7	393	137	6608	0.714733
ko05144	Malaria	4	393	81	6608	0.718451
ko04392	Hippo signaling pathway - multiple species	2	393	42	6608	0.722624
ko03013	RNA transport	15	393	284	6608	0.722759
ko05321	Inflammatory bowel disease (IBD)	5	393	101	6608	0.726113
ko04216	Ferroptosis	3	393	63	6608	0.732614
ko00591	Linoleic acid metabolism	2	393	43	6608	0.734676
ko01521	EGFR tyrosine kinase inhibitor resistance	7	393	140	6608	0.735599
ko05211	Renal cell carcinoma	6	393	122	6608	0.741404
ko00053	Ascorbate and aldarate metabolism	1	393	23	6608	0.75651
ko00062	Fatty acid elongation	2	393	45	6608	0.757446
ko04657	IL-17 signaling pathway	7	393	145	6608	0.767975
ko04213	Longevity regulating pathway - multiple species	5	393	107	6608	0.771432
ko05206	MicroRNAs in cancer	14	393	277	6608	0.775729
ko00650	Butanoate metabolism	2	393	47	6608	0.77851
ko03450	Non-homologous end-joining	1	393	25	6608	0.784708
ko04360	Axon guidance	15	393	299	6608	0.791283
ko00561	Glycerolipid metabolism	4	393	91	6608	0.798744
ko00380	Tryptophan metabolism	3	393	71	6608	0.803113
ko05219	Bladder cancer	3	393	71	6608	0.803113
ko00020	Citrate cycle (TCA cycle)	2	393	50	6608	0.807104
ko00140	Steroid hormone biosynthesis	3	393	72	6608	0.810728
ko05140	Leishmaniasis	5	393	115	6608	0.822681
ko00512	Mucin type O-glycan biosynthesis	2	393	52	6608	0.824298
ko04668	TNF signaling pathway	9	393	194	6608	0.82445
ko05223	Non-small cell lung cancer	5	393	116	6608	0.828385
ko04137	Mitophagy - animal	5	393	117	6608	0.833939
ko05204	Chemical carcinogenesis	4	393	97	6608	0.837361
ko04974	Protein digestion and absorption	6	393	138	6608	0.838092
ko04623	Cytosolic DNA-sensing pathway	4	393	98	6608	0.843156
ko04110	Cell cycle	10	393	218	6608	0.844303
ko04146	Peroxisome	6	393	140	6608	0.847834
ko04911	Insulin secretion	6	393	140	6608	0.847834
ko00531	Glycosaminoglycan degradation	1	393	31	6608	0.851213
ko00120	Primary bile acid biosynthesis	1	393	31	6608	0.851213
ko04934	Cushing syndrome	13	393	278	6608	0.853277
ko05134	Legionellosis	4	393	100	6608	0.854228
ko00982	Drug metabolism - cytochrome P450	3	393	79	6608	0.857339
ko00040	Pentose and glucuronate interconversions	1	393	32	6608	0.860103
ko04136	Autophagy - other	2	393	57	6608	0.861411
ko05226	Gastric cancer	11	393	242	6608	0.861516
ko00600	Sphingolipid metabolism	3	393	80	6608	0.863108
ko04919	Thyroid hormone signaling pathway	9	393	204	6608	0.865297
ko05212	Pancreatic cancer	6	393	145	6608	0.870115
ko04068	FoxO signaling pathway	10	393	226	6608	0.873436
ko03030	DNA replication	2	393	59	6608	0.874139
ko04141	Protein processing in endoplasmic reticulum	13	393	285	6608	0.875547
ko00770	Pantothenate and CoA biosynthesis	1	393	34	6608	0.876326
ko00511	Other glycan degradation	1	393	34	6608	0.876326
ko03320	PPAR signaling pathway	5	393	126	6608	0.877592
ko04960	Aldosterone-regulated sodium reabsorption	2	393	60	6608	0.880092
ko05033	Nicotine addiction	2	393	61	6608	0.885784
ko03040	Spliceosome	10	393	230	6608	0.886269
ko05210	Colorectal cancer	6	393	150	6608	0.889618
ko04672	Intestinal immune network for IgA production	2	393	62	6608	0.891226
ko05130	Pathogenic Escherichia coli infection	3	393	86	6608	0.893601
ko04923	Regulation of lipolysis in adipocytes	3	393	87	6608	0.898046
ko00280	Valine, leucine and isoleucine degradation	3	393	87	6608	0.898046
ko00230	Purine metabolism	9	393	214	6608	0.898151
ko04744	Phototransduction	1	393	38	6608	0.903357
ko00900	Terpenoid backbone biosynthesis	1	393	38	6608	0.903357
ko00514	Other types of O-glycan biosynthesis	1	393	38	6608	0.903357
ko04950	Maturity onset diabetes of the young	1	393	38	6608	0.903357
ko04972	Pancreatic secretion	6	393	154	6608	0.903382
ko05131	Shigellosis	4	393	111	6608	0.903921
ko00310	Lysine degradation	4	393	112	6608	0.907597
ko04530	Tight junction	12	393	278	6608	0.909068
ko04120	Ubiquitin mediated proteolysis	10	393	239	6608	0.911281
ko04726	Serotonergic synapse	7	393	178	6608	0.912491
ko04964	Proximal tubule bicarbonate reclamation	1	393	40	6608	0.914574
ko00515	Mannose type O-glycan biosynthesis	1	393	41	6608	0.919686
ko00592	alpha-Linolenic acid metabolism	1	393	41	6608	0.919686
ko04914	Progesterone-mediated oocyte maturation	6	393	160	6608	0.921257
ko00071	Fatty acid degradation	2	393	69	6608	0.92307
ko05218	Melanoma	4	393	117	6608	0.924172
ko01524	Platinum drug resistance	4	393	117	6608	0.924172
ko00790	Folate biosynthesis	1	393	42	6608	0.924492
ko04931	Insulin resistance	7	393	183	6608	0.925652
ko04114	Oocyte meiosis	8	393	205	6608	0.927965
ko04670	Leukocyte transendothelial migration	7	393	184	6608	0.928068
ko04913	Ovarian steroidogenesis	2	393	72	6608	0.933835
ko04922	Glucagon signaling pathway	6	393	165	6608	0.933878
ko04920	Adipocytokine signaling pathway	4	393	121	6608	0.935457
ko04730	Long-term depression	3	393	98	6608	0.936987
ko04966	Collecting duct acid secretion	1	393	45	6608	0.937257
ko00860	Porphyrin and chlorophyll metabolism	1	393	45	6608	0.937257
ko05202	Transcriptional misregulation in cancer	13	393	312	6608	0.937461
ko00565	Ether lipid metabolism	2	393	74	6608	0.940203
ko03020	RNA polymerase	1	393	46	6608	0.941014
ko04060	Cytokine-cytokine receptor interaction	18	393	414	6608	0.942134
ko04260	Cardiac muscle contraction	4	393	124	6608	0.942899
ko03022	Basal transcription factors	2	393	75	6608	0.943165
ko05162	Measles	9	393	234	6608	0.944098
ko05215	Prostate cancer	6	393	170	6608	0.944679
ko04115	p53 signaling pathway	4	393	125	6608	0.945201
ko05410	Hypertrophic cardiomyopathy (HCM	5	393	148	6608	0.945291
ko04340	Hedgehog signaling pathway	2	393	76	6608	0.945987
ko00830	Retinol metabolism	2	393	76	6608	0.945987
ko05332	Graft-versus-host disease	1	393	48	6608	0.947868
ko00630	Glyoxylate and dicarboxylate metabolism	1	393	48	6608	0.947868
ko05031	Amphetamine addiction	3	393	103	6608	0.949691
ko04211	Longevity regulating pathway	5	393	151	6608	0.951266
ko01523	Antifolate resistance	1	393	50	6608	0.953928
ko05414	Dilated cardiomyopathy (DCM	5	393	154	6608	0.956643
ko04350	TGF-beta signaling pathway	5	393	154	6608	0.956643
ko04710	Circadian rhythm	1	393	51	6608	0.956689
ko00030	Pentose phosphate pathway	1	393	51	6608	0.956689
ko04024	cAMP signaling pathway	14	393	346	6608	0.957134
ko04666	Fc gamma R-mediated phagocytosis	5	393	155	6608	0.958312
ko04910	Insulin signaling pathway	8	393	222	6608	0.958654
ko04961	Endocrine and other factor-regulated calcium reabsorption	2	393	82	6608	0.960313
ko00520	Amino sugar and nucleotide sugar metabolism	2	393	82	6608	0.960313
ko00051	Fructose and mannose metabolism	1	393	53	6608	0.961725
ko04720	Long-term potentiation	3	393	110	6608	0.963514
ko00250	Alanine, aspartate and glutamate metabolism	1	393	54	6608	0.96402
ko04978	Mineral absorption	2	393	84	6608	0.964222
ko05110	Vibrio cholerae infection	2	393	84	6608	0.964222
ko05161	Hepatitis B	10	393	270	6608	0.96506
ko04925	Aldosterone synthesis and secretion	5	393	160	6608	0.965808
ko00500	Starch and sucrose metabolism	1	393	55	6608	0.966178
ko05143	African trypanosomiasis	1	393	55	6608	0.966178
ko04015	Rap1 signaling pathway	13	393	334	6608	0.966308
ko04514	Cell adhesion molecules (CAMs	7	393	207	6608	0.967575
ko05416	Viral myocarditis	2	393	86	6608	0.967759
ko00350	Tyrosine metabolism	1	393	56	6608	0.968206
ko04727	GABAergic synapse	4	393	138	6608	0.968316
ko05132	Salmonella infection	4	393	138	6608	0.968316
ko05340	Primary immunodeficiency	1	393	57	6608	0.970113
ko04130	SNARE interactions in vesicular transport	1	393	57	6608	0.970113
ko03008	Ribosome biogenesis in eukaryotes	3	393	115	6608	0.97111
ko05014	Amyotrophic lateral sclerosis (ALS	2	393	89	6608	0.972443
ko04932	Non-alcoholic fatty liver disease (NAFLD	9	393	257	6608	0.9736
ko04714	Thermogenesis	14	393	364	6608	0.974342
ko04810	Regulation of actin cytoskeleton	13	393	344	6608	0.974965
ko04659	Th17 cell differentiation	5	393	169	6608	0.976261
ko04540	Gap junction	4	393	145	6608	0.976627
ko04912	GnRH signaling pathway	4	393	146	6608	0.977632
ko05032	Morphine addiction	4	393	146	6608	0.977632
ko01522	Endocrine resistance	5	393	171	6608	0.978139
ko04721	Synaptic vesicle cycle	3	393	121	6608	0.978256
ko04622	RIG-I-like receptor signaling pathway	3	393	121	6608	0.978256
ko05203	Viral carcinogenesis	12	393	329	6608	0.979262
ko04970	Salivary secretion	3	393	123	6608	0.980239
ko05214	Glioma	3	393	124	6608	0.981165
ko04140	Autophagy - animal	7	393	222	6608	0.981376
ko04725	Cholinergic synapse	5	393	175	6608	0.981487
ko04722	Neurotrophin signaling pathway	6	393	200	6608	0.982283
ko04612	Antigen processing and presentation	2	393	98	6608	0.982882
ko05225	Hepatocellular carcinoma	9	393	270	6608	0.983161
ko04973	Carbohydrate digestion and absorption	1	393	67	6608	0.983908
ko04071	Sphingolipid signaling pathway	6	393	203	6608	0.984282
ko04713	Circadian entrainment	4	393	154	6608	0.984328
ko00590	Arachidonic acid metabolism	2	393	100	6608	0.984616
ko00564	Glycerophospholipid metabolism	4	393	155	6608	0.985017
ko05146	Amoebiasis	4	393	155	6608	0.985017
ko00620	Pyruvate metabolism	1	393	69	6608	0.985784
ko05217	Basal cell carcinoma	2	393	102	6608	0.986179
ko04723	Retrograde endocannabinoid signaling	7	393	230	6608	0.986283
ko00190	Oxidative phosphorylation	6	393	208	6608	0.987152
ko04066	HIF-1 signaling pathway	4	393	159	6608	0.987497
ko04916	Melanogenesis	4	393	160	6608	0.988053
ko05160	Hepatitis C	8	393	257	6608	0.988142
ko03420	Nucleotide excision repair	1	393	72	6608	0.988196
ko04550	Signaling pathways regulating pluripotency of stem cells	7	393	234	6608	0.988257
ko04261	Adrenergic signaling in cardiomyocytes	7	393	235	6608	0.988707
ko04924	Renin secretion	2	393	106	6608	0.988856
ko04218	Cellular senescence	8	393	259	6608	0.989002
ko04022	cGMP-PKG signaling pathway	8	393	260	6608	0.989409
ko04915	Estrogen signaling pathway	6	393	214	6608	0.989948
ko04620	Toll-like receptor signaling pathway	4	393	165	6608	0.990498
ko04144	Endocytosis	15	393	418	6608	0.990591
ko03010	Ribosome	6	393	216	6608	0.990744
ko04930	Type II diabetes mellitus	1	393	76	6608	0.99079
ko05323	Rheumatoid arthritis	3	393	139	6608	0.990942
ko04660	T cell receptor signaling pathway	4	393	167	6608	0.991336
ko03050	Proteasome	1	393	77	6608	0.991344
ko04933	AGE-RAGE signaling pathway in diabetic complications	4	393	169	6608	0.992103
ko04611	Platelet activation	5	393	195	6608	0.992143
ko05224	Breast cancer	7	393	246	6608	0.992701
ko04072	Phospholipase D signaling pathway	6	393	222	6608	0.992792
ko05142	Chagas disease (American trypanosomiasis	4	393	171	6608	0.992805
ko00970	Aminoacyl-tRNA biosynthesis	1	393	80	6608	0.992815
ko04662	B cell receptor signaling pathway	2	393	115	6608	0.993164
ko00980	Metabolism of xenobiotics by cytochrome P450	1	393	81	6608	0.993247
ko04979	Cholesterol metabolism	1	393	81	6608	0.993247
ko04971	Gastric acid secretion	2	393	116	6608	0.993528
ko05221	Acute myeloid leukemia	2	393	117	6608	0.993873
ko00010	Glycolysis / Gluconeogenesis	2	393	117	6608	0.993873
ko05133	Pertussis	2	393	118	6608	0.994199
ko04621	NOD-like receptor signaling pathway	8	393	276	6608	0.994284
ko04014	Ras signaling pathway	12	393	370	6608	0.994723
ko00510	N-Glycan biosynthesis	1	393	85	6608	0.994733
ko04658	Th1 and Th2 cell differentiation	3	393	150	6608	0.994774
ko05205	Proteoglycans in cancer	11	393	348	6608	0.994815
ko04064	NF-kappa B signaling pathway	3	393	151	6608	0.995032
ko05010	Alzheimer disease	8	393	280	6608	0.995118
ko05164	Influenza A	7	393	257	6608	0.995335
ko04010	MAPK signaling pathway	17	393	483	6608	0.995353
ko04728	Dopaminergic synapse	5	393	208	6608	0.995592
ko00562	Inositol phosphate metabolism	2	393	123	6608	0.995594
ko05169	Epstein-Barr virus infection	10	393	330	6608	0.995665
ko04724	Glutamatergic synapse	4	393	182	6608	0.995715
ko04380	Osteoclast differentiation	5	393	209	6608	0.995786
ko05145	Toxoplasmosis	4	393	183	6608	0.995914
ko04270	Vascular smooth muscle contraction	5	393	211	6608	0.996151
ko05016	Huntington disease	9	393	311	6608	0.99633
ko04650	Natural killer cell mediated cytotoxicity	4	393	186	6608	0.99646
ko04145	Phagosome	6	393	239	6608	0.996514
ko05231	Choline metabolism in cancer	3	393	161	6608	0.997015
ko05222	Small cell lung cancer	3	393	162	6608	0.997164
ko05418	Fluid shear stress and atherosclerosis	5	393	218	6608	0.997202
ko05167	Kaposi sarcoma-associated herpesvirus infection	8	393	294	6608	0.997219
ko04370	VEGF signaling pathway	1	393	98	6608	0.997654
ko04625	C-type lectin receptor signaling pathway	3	393	166	6608	0.997693
ko05166	Human T-cell leukemia virus 1 infection	10	393	349	6608	0.997902
ko04630	Jak-STAT signaling pathway	6	393	252	6608	0.998032
ko04371	Apelin signaling pathway	5	393	226	6608	0.998067
ko05034	Alcoholism	7	393	279	6608	0.998152
ko05230	Central carbon metabolism in cancer	1	393	103	6608	0.998281
ko04142	Lysosome	4	393	202	6608	0.998372
ko04664	Fc epsilon RI signaling pathway	1	393	104	6608	0.998385
ko04210	Apoptosis	5	393	231	6608	0.998469
ko04512	ECM-receptor interaction	2	393	142	6608	0.998471
ko04926	Relaxin signaling pathway	4	393	204	6608	0.998524
ko04921	Oxytocin signaling pathway	5	393	237	6608	0.998846
ko04917	Prolactin signaling pathway	1	393	111	6608	0.998956
ko04742	Taste transduction	1	393	112	6608	0.99902
ko04070	Phosphatidylinositol signaling system	2	393	156	6608	0.999307
ko04150	mTOR signaling pathway	5	393	251	6608	0.999409
ko04310	Wnt signaling pathway	5	393	256	6608	0.999536
ko04510	Focal adhesion	8	393	339	6608	0.999588
ko05163	Human cytomegalovirus infection	9	393	365	6608	0.999598
ko05152	Tuberculosis	6	393	294	6608	0.999715
ko05200	Pathways in cancer	31	393	872	6608	0.999755
ko05322	Systemic lupus erythematosus	2	393	180	6608	0.999825
ko05012	Parkinson disease	3	393	215	6608	0.999829
ko05165	Human papillomavirus infection	16	393	560	6608	0.999862
ko04062	Chemokine signaling pathway	5	393	282	6608	0.999871
ko04020	Calcium signaling pathway	5	393	287	6608	0.9999
ko04080	Neuroactive ligand-receptor interaction	12	393	473	6608	0.999902
ko04151	PI3K-Akt signaling pathway	16	393	573	6608	0.999917
ko04217	Necroptosis	4	393	261	6608	0.99992
ko04750	Inflammatory mediator regulation of TRP channels	1	393	156	6608	0.999938
ko05168	Herpes simplex virus 1 infection	23	393	771	6608	0.99998
ko05170	Human immunodeficiency virus 1 infection	4	393	344	6608	0.999999
