# Supplementary material for: Whole-Transcriptome Sequencing of Knee Joint Cartilage from Kashin–Beck Disease and Osteoarthritis Patients
Source: Int J Mol Sci. 2024 Apr 15;25(8):4348. doi: 10.3390/ijms25084348 (PMC11049856; doi:10.3390/ijms25084348)
Supplement: Supplementary file 1 [file ijms-25-04348-s001.zip › Supplementary Table S7_KBDVSOA_circRNA_differential_expression.xlsx]

## Sheet: Sheet1
Supplementary Table S7. Differentially expressed circRNA between KBD and OA
Accession	log2FoldChange	regulation	pvalue	qvalue	chr	start	end	strand	exon Count	circType	isoformName	geneName	flankIntron	gene Discription	GO	KEGG	EC
circRNA23835	-inf	down	4.99219e-07	0.000152262	chr14	89161702	89162969	-	1	circRNA	ENST00000615335	FOXN3	chr14:89162969-89180701	forkhead box N3 [Source:HGNC Symbol;Acc:HGNC:1928]	GO:0000790(nuclear chromatin);GO:0000981(DNA-binding transcription factor activity, RNA polymerase II-specific);GO:0003677(DNA binding);GO:0003700(DNA-binding transcription factor activity);GO:0005515(protein binding);GO:0005634(nucleus);GO:0006355(regulation of transcription, DNA-templated);GO:0006357(regulation of transcription by RNA polymerase II);GO:0007049(cell cycle);GO:0007095(mitotic G2 …	NA	NA
hsa_circ_0104054	inf	up	2.57508e-07	0.00015708	chr15	61015798	61094611	-	1	intergenic	intergenic_circRNA	intergenic_circRNA	chr15:61015797-61094611	NA	NA	NA	NA
circRNA4007	3.13696	up	4.08282e-07	0.000373578	chr2	199348701	199433514	-	2	circRNA	ENST00000614512	SATB2	chr2:199328910-199348700|chr2:199433514-199455868	SATB homeobox 2 [Source:HGNC Symbol;Acc:HGNC:21637]	GO:0000118(histone deacetylase complex);GO:0000122(negative regulation of transcription by RNA polymerase II);GO:0000790(nuclear chromatin);GO:0000977(RNA polymerase II regulatory region sequence-specific DNA binding);GO:0000978(RNA polymerase II cis-regulatory region sequence-specific DNA binding);GO:0000981(DNA-binding transcription factor activity, RNA polymerase II-specific);GO:0001228(DNA-bi…	NA	NA
circRNA5281	inf	up	3.63516e-07	0.00044349	chr8	37765527	37766355	+	3	circRNA	ENST00000523994	PLPBP	chr8:37762758-37765526|chr8:37766355-37766482	pyridoxal phosphate binding protein [Source:HGNC Symbol;Acc:HGNC:9457]	GO:0005622(intracellular);GO:0005737(cytoplasm);GO:0005829(cytosol);GO:0008150(biological_process);GO:0030170(pyridoxal phosphate binding)	NA	NA
circRNA5747	inf	up	3.32463e-07	0.000507006	chr12	47986411	47987648	+	5	circRNA	ENST00000337299	COL2A1	chr12:47985965-47986336|chr12:47987709-47989228	collagen type II alpha 1 chain [Source:HGNC Symbol;Acc:HGNC:2200]	GO:0001501(skeletal system development);GO:0001502(cartilage condensation);GO:0001503(ossification);GO:0001894(tissue homeostasis);GO:0001958(endochondral ossification);GO:0002062(chondrocyte differentiation);GO:0003007(heart morphogenesis);GO:0005201(extracellular matrix structural constituent);GO:0005515(protein binding);GO:0005576(extracellular region);GO:0005581(collagen trimer);GO:0005585(co…	04151(PI3K-Akt signaling pathway);04510(Focal adhesion);04512(ECM-receptor interaction);04974(Protein digestion and absorption);05165(Human papillomavirus infection)	NA
circRNA9520	inf	up	2.87858e-07	0.000526781	chr12	47982503	47982946	-	2	circRNA	ENST00000483376	COL2A1	chr12:47982160-47982502|chr12:47982946-47983093	collagen type II alpha 1 chain [Source:HGNC Symbol;Acc:HGNC:2200]	GO:0001501(skeletal system development);GO:0001502(cartilage condensation);GO:0001503(ossification);GO:0001894(tissue homeostasis);GO:0001958(endochondral ossification);GO:0002062(chondrocyte differentiation);GO:0003007(heart morphogenesis);GO:0005201(extracellular matrix structural constituent);GO:0005515(protein binding);GO:0005576(extracellular region);GO:0005581(collagen trimer);GO:0005585(co…	04151(PI3K-Akt signaling pathway);04510(Focal adhesion);04512(ECM-receptor interaction);04974(Protein digestion and absorption);05165(Human papillomavirus infection)	NA
circRNA14184	inf	up	2.95673e-07	0.000631261	chr2	188991031	188992940	+	1	intergenic	intergenic_circRNA	intergenic_circRNA	chr2:188991030-188992940	NA	NA	NA	NA
circRNA14135	inf	up	3.1749e-07	0.000774675	chr17	50192798	50194447	-	5	circRNA	ENST00000225964	COL1A1	chr17:50192693-50192797|chr17:50194447-50194573	collagen type I alpha 1 chain [Source:HGNC Symbol;Acc:HGNC:2197]	GO:0001501(skeletal system development);GO:0001503(ossification);GO:0001568(blood vessel development);GO:0001649(osteoblast differentiation);GO:0001957(intramembranous ossification);GO:0001958(endochondral ossification);GO:0002020(protease binding);GO:0005201(extracellular matrix structural constituent);GO:0005515(protein binding);GO:0005576(extracellular region);GO:0005581(collagen trimer);GO:00…	04151(PI3K-Akt signaling pathway);04510(Focal adhesion);04512(ECM-receptor interaction);04611(Platelet activation);04926(Relaxin signaling pathway);04933(AGE-RAGE signaling pathway in diabetic complications);04974(Protein digestion and absorption);05146(Amoebiasis);05165(Human papillomavirus infection)	NA
circRNA17683	inf	up	2.94577e-07	0.000808614	chr17	50193982	50194619	+	4	circRNA	ENST00000225964	COL1A1	chr17:50193047-50193943|chr17:50194626-50194721	collagen type I alpha 1 chain [Source:HGNC Symbol;Acc:HGNC:2197]	GO:0001501(skeletal system development);GO:0001503(ossification);GO:0001568(blood vessel development);GO:0001649(osteoblast differentiation);GO:0001957(intramembranous ossification);GO:0001958(endochondral ossification);GO:0002020(protease binding);GO:0005201(extracellular matrix structural constituent);GO:0005515(protein binding);GO:0005576(extracellular region);GO:0005581(collagen trimer);GO:00…	04151(PI3K-Akt signaling pathway);04510(Focal adhesion);04512(ECM-receptor interaction);04611(Platelet activation);04926(Relaxin signaling pathway);04933(AGE-RAGE signaling pathway in diabetic complications);04974(Protein digestion and absorption);05146(Amoebiasis);05165(Human papillomavirus infection)	NA
hsa_circ_0089842	-4.93992	down	3.40718e-07	0.00103919	X	6150995	6151771	-	1	circRNA	ENST00000381093	NLGN4X	X:6029432-6150994|X:6151771-6226879	neuroligin 4 X-linked [Source:HGNC Symbol;Acc:HGNC:14287]	GO:0003360(brainstem development);GO:0005515(protein binding);GO:0005886(plasma membrane);GO:0005887(integral component of plasma membrane);GO:0007155(cell adhesion);GO:0007158(neuron cell-cell adhesion);GO:0007268(chemical synaptic transmission);GO:0007612(learning);GO:0009986(cell surface);GO:0016020(membrane);GO:0016021(integral component of membrane);GO:0021549(cerebellum development);GO:0030…	04514(Cell adhesion molecules (CAMs))	NA
hsa_circ_0008433	1.77311	up	3.32555e-07	0.00111572	chr1	65913245	65918835	+	2	circRNA	ENST00000329654	PDE4B	chr1:65792630-65913244|chr1:65918835-66247459	phosphodiesterase 4B [Source:HGNC Symbol;Acc:HGNC:8781]	GO:0000930(gamma-tubulin complex);GO:0001780(neutrophil homeostasis);GO:0004114(3',5'-cyclic-nucleotide phosphodiesterase activity);GO:0004115(3',5'-cyclic-AMP phosphodiesterase activity);GO:0005813(centrosome);GO:0005829(cytosol);GO:0005891(voltage-gated calcium channel complex);GO:0006198(cAMP catabolic process);GO:0007165(signal transduction);GO:0007186(G protein-coupled receptor signaling pat…	00230(Purine metabolism);04024(cAMP signaling pathway);04928(Parathyroid hormone synthesis, secretion and action);05032(Morphine addiction)	NA
hsa_circ_0000348	1.66037	up	3.37358e-07	0.00123473	chr11	92352096	92355404	+	1	circRNA	ENST00000409404	FAT3	None|chr11:92355404-92524633	FAT atypical cadherin 3 [Source:HGNC Symbol;Acc:HGNC:23112]	GO:0005509(calcium ion binding);GO:0005886(plasma membrane);GO:0007155(cell adhesion);GO:0007156(homophilic cell adhesion via plasma membrane adhesion molecules);GO:0007275(multicellular organism development);GO:0016020(membrane);GO:0016021(integral component of membrane);GO:0098609(cell-cell adhesion)	NA	NA
hsa_circ_0073237	1.97929	up	3.59201e-07	0.00142423	chr5	83537007	83542268	+	1	circRNA	ENST00000343200	VCAN	chr5:83512396-83537006|chr5:83542268-83545536	versican [Source:HGNC Symbol;Acc:HGNC:2464]	GO:0001501(skeletal system development);GO:0001649(osteoblast differentiation);GO:0001750(photoreceptor outer segment);GO:0005509(calcium ion binding);GO:0005515(protein binding);GO:0005539(glycosaminoglycan binding);GO:0005540(hyaluronic acid binding);GO:0005576(extracellular region);GO:0005615(extracellular space);GO:0005788(endoplasmic reticulum lumen);GO:0005796(Golgi lumen);GO:0007155(cell a…	04514(Cell adhesion molecules (CAMs))	NA
circRNA17620	inf	up	3.41498e-07	0.0014582	chr10	31908173	31910563	-	2	circRNA	ENST00000375250	ARHGAP12	chr10:31861658-31908172|chr10:31910563-31928683	Rho GTPase activating protein 12 [Source:HGNC Symbol;Acc:HGNC:16348]	GO:0001891(phagocytic cup);GO:0002011(morphogenesis of an epithelial sheet);GO:0005096(GTPase activator activity);GO:0005515(protein binding);GO:0005737(cytoplasm);GO:0005829(cytosol);GO:0006911(phagocytosis, engulfment);GO:0007015(actin filament organization);GO:0007165(signal transduction);GO:0043087(regulation of GTPase activity);GO:0043547(positive regulation of GTPase activity);GO:0051056(re…	NA	NA
circRNA14138	inf	up	3.36318e-07	0.00153865	chr17	50193964	50194619	+	4	circRNA	ENST00000225964	COL1A1	chr17:50193047-50193943|chr17:50194626-50194721	collagen type I alpha 1 chain [Source:HGNC Symbol;Acc:HGNC:2197]	GO:0001501(skeletal system development);GO:0001503(ossification);GO:0001568(blood vessel development);GO:0001649(osteoblast differentiation);GO:0001957(intramembranous ossification);GO:0001958(endochondral ossification);GO:0002020(protease binding);GO:0005201(extracellular matrix structural constituent);GO:0005515(protein binding);GO:0005576(extracellular region);GO:0005581(collagen trimer);GO:00…	04151(PI3K-Akt signaling pathway);04510(Focal adhesion);04512(ECM-receptor interaction);04611(Platelet activation);04926(Relaxin signaling pathway);04933(AGE-RAGE signaling pathway in diabetic complications);04974(Protein digestion and absorption);05146(Amoebiasis);05165(Human papillomavirus infection)	NA
circRNA5713	inf	up	3.30486e-07	0.00161277	X	153508392	153508569	-	1	circRNA	ENST00000480756	BGN	X:153507185-153508248	biglycan [Source:HGNC Symbol;Acc:HGNC:1044]	GO:0001974(blood vessel remodeling);GO:0005201(extracellular matrix structural constituent);GO:0005515(protein binding);GO:0005539(glycosaminoglycan binding);GO:0005576(extracellular region);GO:0005615(extracellular space);GO:0005796(Golgi lumen);GO:0008150(biological_process);GO:0009986(cell surface);GO:0019800(peptide cross-linking via chondroitin 4-sulfate glycosaminoglycan);GO:0030021(extrace…	NA	NA
circRNA26290	-inf	down	3.12207e-07	0.0016188	chr4	147906639	147955374	+	6	circRNA	ENST00000507661	ARHGAP10	chr4:147881932-147906638|chr4:147955374-147965024	Rho GTPase activating protein 10 [Source:HGNC Symbol;Acc:HGNC:26099]	GO:0005096(GTPase activator activity);GO:0005515(protein binding);GO:0005737(cytoplasm);GO:0005829(cytosol);GO:0005886(plasma membrane);GO:0007010(cytoskeleton organization);GO:0007165(signal transduction);GO:0016020(membrane);GO:0043066(negative regulation of apoptotic process);GO:0043547(positive regulation of GTPase activity);GO:0048471(perinuclear region of cytoplasm);GO:0051056(regulation of…	05100(Bacterial invasion of epithelial cells)	NA
circRNA5727	inf	up	3.0505e-07	0.00167472	chr12	47973404	47974187	+	2	circRNA	ENST00000493991	COL2A1	chr12:47974331-47974675	collagen type II alpha 1 chain [Source:HGNC Symbol;Acc:HGNC:2200]	GO:0001501(skeletal system development);GO:0001502(cartilage condensation);GO:0001503(ossification);GO:0001894(tissue homeostasis);GO:0001958(endochondral ossification);GO:0002062(chondrocyte differentiation);GO:0003007(heart morphogenesis);GO:0005201(extracellular matrix structural constituent);GO:0005515(protein binding);GO:0005576(extracellular region);GO:0005581(collagen trimer);GO:0005585(co…	04151(PI3K-Akt signaling pathway);04510(Focal adhesion);04512(ECM-receptor interaction);04974(Protein digestion and absorption);05165(Human papillomavirus infection)	NA
hsa_circ_0069064	3.505	up	2.98579e-07	0.00173027	chr4	5729307	5756362	+	9	circRNA	ENST00000264956	EVC	chr4:5719373-5729306|chr4:5756362-5783551	EvC ciliary complex subunit 1 [Source:HGNC Symbol;Acc:HGNC:3497]	GO:0001501(skeletal system development);GO:0003416(endochondral bone growth);GO:0005737(cytoplasm);GO:0005856(cytoskeleton);GO:0005886(plasma membrane);GO:0005929(cilium);GO:0007224(smoothened signaling pathway);GO:0007517(muscle organ development);GO:0016020(membrane);GO:0016021(integral component of membrane);GO:0036064(ciliary basal body);GO:0042995(cell projection);GO:0045880(positive regulat…	04340(Hedgehog signaling pathway)	NA
circRNA14146	5.13412	up	2.90632e-07	0.00177286	chr17	50196315	50197063	-	4	circRNA	ENST00000225964	COL1A1	chr17:50196199-50196314|chr17:50197063-50197180	collagen type I alpha 1 chain [Source:HGNC Symbol;Acc:HGNC:2197]	GO:0001501(skeletal system development);GO:0001503(ossification);GO:0001568(blood vessel development);GO:0001649(osteoblast differentiation);GO:0001957(intramembranous ossification);GO:0001958(endochondral ossification);GO:0002020(protease binding);GO:0005201(extracellular matrix structural constituent);GO:0005515(protein binding);GO:0005576(extracellular region);GO:0005581(collagen trimer);GO:00…	04151(PI3K-Akt signaling pathway);04510(Focal adhesion);04512(ECM-receptor interaction);04611(Platelet activation);04926(Relaxin signaling pathway);04933(AGE-RAGE signaling pathway in diabetic complications);04974(Protein digestion and absorption);05146(Amoebiasis);05165(Human papillomavirus infection)	NA
hsa_circ_0093493	2.14115	up	3.1972e-07	0.00204781	chr10	263204	263658	-	1	intergenic	intergenic_circRNA	intergenic_circRNA	chr10:263203-263658	NA	NA	NA	NA
circRNA5752	inf	up	3.08588e-07	0.00207063	chr12	47987079	47993502	-	7	circRNA	ENST00000337299	COL2A1	chr12:47986888-47987078|chr12:47993502-47993809	collagen type II alpha 1 chain [Source:HGNC Symbol;Acc:HGNC:2200]	GO:0001501(skeletal system development);GO:0001502(cartilage condensation);GO:0001503(ossification);GO:0001894(tissue homeostasis);GO:0001958(endochondral ossification);GO:0002062(chondrocyte differentiation);GO:0003007(heart morphogenesis);GO:0005201(extracellular matrix structural constituent);GO:0005515(protein binding);GO:0005576(extracellular region);GO:0005581(collagen trimer);GO:0005585(co…	04151(PI3K-Akt signaling pathway);04510(Focal adhesion);04512(ECM-receptor interaction);04974(Protein digestion and absorption);05165(Human papillomavirus infection)	NA
ciRNA292	2.88006	up	3.06158e-07	0.0021477	X	1365103	1368090	-	1	ciRNA	ENST00000381469	IL3RA	X:1365102-1368090	interleukin 3 receptor subunit alpha [Source:HGNC Symbol;Acc:HGNC:6012]	GO:0000165(MAPK cascade);GO:0004896(cytokine receptor activity);GO:0004912(interleukin-3 receptor activity);GO:0005515(protein binding);GO:0005886(plasma membrane);GO:0009897(external side of plasma membrane);GO:0016020(membrane);GO:0016021(integral component of membrane);GO:0019221(cytokine-mediated signaling pathway);GO:0019955(cytokine binding);GO:0036016(cellular response to interleukin-3);GO…	04060(Cytokine-cytokine receptor interaction);04151(PI3K-Akt signaling pathway);04210(Apoptosis);04630(Jak-STAT signaling pathway);04640(Hematopoietic cell lineage);05200(Pathways in cancer)	NA
circRNA5694	-4.61238	down	2.98569e-07	0.00218553	chr1	235419474	235434280	+	4	circRNA	ENST00000644604	TBCE	chr1:235414618-235419473|chr1:235434280-235435745	tubulin folding cofactor E [Source:HGNC Symbol;Acc:HGNC:11582]	GO:0000226(microtubule cytoskeleton organization);GO:0003735(structural constituent of ribosome);GO:0005515(protein binding);GO:0005737(cytoplasm);GO:0005840(ribosome);GO:0005856(cytoskeleton);GO:0005874(microtubule);GO:0006412(translation);GO:0006457(protein folding);GO:0007021(tubulin complex assembly);GO:0007023(post-chaperonin tubulin folding pathway);GO:0007052(mitotic spindle organization);…	NA	NA
circRNA26295	-inf	down	2.86824e-07	0.00218704	chr1	152314907	152335439	+	3	circRNA	ENST00000420707	FLG-AS1	chr1:152301833-152314906|chr1:152335439-152337989	FLG antisense RNA 1 [Source:HGNC Symbol;Acc:HGNC:27913]	NA	NA	NA
hsa_circ_0000199	-inf	down	3.03871e-07	0.0024097	chr1	243545510	243573048	-	4	circRNA	ENST00000336199	AKT3	chr1:243512426-243545509|chr1:243573048-243613670	AKT serine/threonine kinase 3 [Source:HGNC Symbol;Acc:HGNC:393]	GO:0000002(mitochondrial genome maintenance);GO:0000166(nucleotide binding);GO:0001938(positive regulation of endothelial cell proliferation);GO:0004672(protein kinase activity);GO:0004674(protein serine/threonine kinase activity);GO:0005515(protein binding);GO:0005524(ATP binding);GO:0005634(nucleus);GO:0005737(cytoplasm);GO:0006468(protein phosphorylation);GO:0007165(signal transduction);GO:001…	01521(EGFR tyrosine kinase inhibitor resistance);01522(Endocrine resistance);01524(Platinum drug resistance);04010(MAPK signaling pathway);04012(ErbB signaling pathway);04014(Ras signaling pathway);04015(Rap1 signaling pathway);04022(cGMP-PKG signaling pathway);04024(cAMP signaling pathway);04062(Chemokine signaling pathway);04066(HIF-1 signaling pathway);04068(FoxO signaling pathway);04071(Sphin…	EC:2.7.11.1
circRNA5041	inf	up	3.10468e-07	0.0025567	chr2	215367917	215370315	-	2	circRNA	ENST00000456923	FN1	chr2:215365630-215367863|chr2:215370432-215371909	fibronectin 1 [Source:HGNC Symbol;Acc:HGNC:3778]	GO:0001525(angiogenesis);GO:0001932(regulation of protein phosphorylation);GO:0002020(protease binding);GO:0002576(platelet degranulation);GO:0005102(signaling receptor binding);GO:0005178(integrin binding);GO:0005201(extracellular matrix structural constituent);GO:0005515(protein binding);GO:0005518(collagen binding);GO:0005576(extracellular region);GO:0005577(fibrinogen complex);GO:0005604(base…	04151(PI3K-Akt signaling pathway);04510(Focal adhesion);04512(ECM-receptor interaction);04810(Regulation of actin cytoskeleton);04933(AGE-RAGE signaling pathway in diabetic complications);05100(Bacterial invasion of epithelial cells);05146(Amoebiasis);05165(Human papillomavirus infection);05200(Pathways in cancer);05205(Proteoglycans in cancer);05222(Small cell lung cancer)	NA
circRNA9617	inf	up	3.07119e-07	0.0026228	chr7	94420624	94423029	+	4	circRNA	ENST00000497316	COL1A2	chr7:94420444-94420541	collagen type I alpha 2 chain [Source:HGNC Symbol;Acc:HGNC:2198]	GO:0001501(skeletal system development);GO:0001568(blood vessel development);GO:0002020(protease binding);GO:0005201(extracellular matrix structural constituent);GO:0005515(protein binding);GO:0005576(extracellular region);GO:0005581(collagen trimer);GO:0005584(collagen type I trimer);GO:0005615(extracellular space);GO:0005783(endoplasmic reticulum);GO:0005788(endoplasmic reticulum lumen);GO:0007…	04151(PI3K-Akt signaling pathway);04510(Focal adhesion);04512(ECM-receptor interaction);04611(Platelet activation);04926(Relaxin signaling pathway);04933(AGE-RAGE signaling pathway in diabetic complications);04974(Protein digestion and absorption);05146(Amoebiasis);05165(Human papillomavirus infection)	NA
circRNA14150	inf	up	3.00436e-07	0.00265736	chr17	50197759	50198489	-	4	circRNA	ENST00000225964	COL1A1	chr17:50197233-50197732|chr17:50198504-50199226	collagen type I alpha 1 chain [Source:HGNC Symbol;Acc:HGNC:2197]	GO:0001501(skeletal system development);GO:0001503(ossification);GO:0001568(blood vessel development);GO:0001649(osteoblast differentiation);GO:0001957(intramembranous ossification);GO:0001958(endochondral ossification);GO:0002020(protease binding);GO:0005201(extracellular matrix structural constituent);GO:0005515(protein binding);GO:0005576(extracellular region);GO:0005581(collagen trimer);GO:00…	04151(PI3K-Akt signaling pathway);04510(Focal adhesion);04512(ECM-receptor interaction);04611(Platelet activation);04926(Relaxin signaling pathway);04933(AGE-RAGE signaling pathway in diabetic complications);04974(Protein digestion and absorption);05146(Amoebiasis);05165(Human papillomavirus infection)	NA
circRNA14144	inf	up	2.92377e-07	0.00267525	chr17	50195435	50196199	-	4	circRNA	ENST00000225964	COL1A1	chr17:50195330-50195434|chr17:50196199-50196314	collagen type I alpha 1 chain [Source:HGNC Symbol;Acc:HGNC:2197]	GO:0001501(skeletal system development);GO:0001503(ossification);GO:0001568(blood vessel development);GO:0001649(osteoblast differentiation);GO:0001957(intramembranous ossification);GO:0001958(endochondral ossification);GO:0002020(protease binding);GO:0005201(extracellular matrix structural constituent);GO:0005515(protein binding);GO:0005576(extracellular region);GO:0005581(collagen trimer);GO:00…	04151(PI3K-Akt signaling pathway);04510(Focal adhesion);04512(ECM-receptor interaction);04611(Platelet activation);04926(Relaxin signaling pathway);04933(AGE-RAGE signaling pathway in diabetic complications);04974(Protein digestion and absorption);05146(Amoebiasis);05165(Human papillomavirus infection)	NA
hsa_circ_0103799	-5.61208	down	2.83944e-07	0.00268469	chr15	50739680	50748870	-	4	circRNA	ENST00000261854	SPPL2A	chr15:50736740-50739679|chr15:50748870-50749635	signal peptide peptidase like 2A [Source:HGNC Symbol;Acc:HGNC:30227]	GO:0004190(aspartic-type endopeptidase activity);GO:0005515(protein binding);GO:0005764(lysosome);GO:0005765(lysosomal membrane);GO:0005768(endosome);GO:0005770(late endosome);GO:0005886(plasma membrane);GO:0006508(proteolysis);GO:0006509(membrane protein ectodomain proteolysis);GO:0008233(peptidase activity);GO:0010803(regulation of tumor necrosis factor-mediated signaling pathway);GO:0016020(me…	NA	NA
circRNA9377	inf	up	2.93763e-07	0.00286712	chr16	30664216	30666541	+	6	circRNA	ENST00000356166	FBRS	chr16:30662859-30664215|chr16:30666541-30666919	fibrosin [Source:HGNC Symbol;Acc:HGNC:20442]	NA	NA	NA
hsa_circ_0017251	-4.43594	down	2.876e-07	0.0028947	chr1	243613671	243695716	-	6	circRNA	ENST00000336199	AKT3	chr1:243573048-243613670|chr1:243695716-243843124	AKT serine/threonine kinase 3 [Source:HGNC Symbol;Acc:HGNC:393]	GO:0000002(mitochondrial genome maintenance);GO:0000166(nucleotide binding);GO:0001938(positive regulation of endothelial cell proliferation);GO:0004672(protein kinase activity);GO:0004674(protein serine/threonine kinase activity);GO:0005515(protein binding);GO:0005524(ATP binding);GO:0005634(nucleus);GO:0005737(cytoplasm);GO:0006468(protein phosphorylation);GO:0007165(signal transduction);GO:001…	01521(EGFR tyrosine kinase inhibitor resistance);01522(Endocrine resistance);01524(Platinum drug resistance);04010(MAPK signaling pathway);04012(ErbB signaling pathway);04014(Ras signaling pathway);04015(Rap1 signaling pathway);04022(cGMP-PKG signaling pathway);04024(cAMP signaling pathway);04062(Chemokine signaling pathway);04066(HIF-1 signaling pathway);04068(FoxO signaling pathway);04071(Sphin…	EC:2.7.11.1
circRNA5862	3.66223	up	2.79989e-07	0.00290348	chr7	94399050	94404746	+	5	circRNA	ENST00000620463	COL1A2	chr7:94398396-94399049|chr7:94404746-94404839	collagen type I alpha 2 chain [Source:HGNC Symbol;Acc:HGNC:2198]	GO:0001501(skeletal system development);GO:0001568(blood vessel development);GO:0002020(protease binding);GO:0005201(extracellular matrix structural constituent);GO:0005515(protein binding);GO:0005576(extracellular region);GO:0005581(collagen trimer);GO:0005584(collagen type I trimer);GO:0005615(extracellular space);GO:0005783(endoplasmic reticulum);GO:0005788(endoplasmic reticulum lumen);GO:0007…	04151(PI3K-Akt signaling pathway);04510(Focal adhesion);04512(ECM-receptor interaction);04611(Platelet activation);04926(Relaxin signaling pathway);04933(AGE-RAGE signaling pathway in diabetic complications);04974(Protein digestion and absorption);05146(Amoebiasis);05165(Human papillomavirus infection)	NA
circRNA5854	-5.05355	down	2.7493e-07	0.00293488	chr10	68936937	68943257	+	3	circRNA	ENST00000466265	DDX50	chr10:68936079-68936936|chr10:68943257-68946352	DExD-box helicase 50 [Source:HGNC Symbol;Acc:HGNC:17906]	GO:0000166(nucleotide binding);GO:0003676(nucleic acid binding);GO:0003723(RNA binding);GO:0003724(RNA helicase activity);GO:0004386(helicase activity);GO:0005524(ATP binding);GO:0005634(nucleus);GO:0005730(nucleolus);GO:0005886(plasma membrane);GO:0016020(membrane);GO:0016787(hydrolase activity)	NA	EC:3.6.4.13
hsa_circ_0002113	4.16462	up	3.04465e-07	0.00334302	chr21	33421480	33432871	+	4	circRNA	ENST00000290219	IFNGR2	chr21:33415020-33421479|chr21:33432871-33436827	interferon gamma receptor 2 [Source:HGNC Symbol;Acc:HGNC:5440]	GO:0000139(Golgi membrane);GO:0001774(microglial cell activation);GO:0004896(cytokine receptor activity);GO:0004906(interferon-gamma receptor activity);GO:0005515(protein binding);GO:0005737(cytoplasm);GO:0005783(endoplasmic reticulum);GO:0005789(endoplasmic reticulum membrane);GO:0005794(Golgi apparatus);GO:0005886(plasma membrane);GO:0005887(integral component of plasma membrane);GO:0007166(cel…	04060(Cytokine-cytokine receptor interaction);04066(HIF-1 signaling pathway);04217(Necroptosis);04380(Osteoclast differentiation);04630(Jak-STAT signaling pathway);04650(Natural killer cell mediated cytotoxicity);04658(Th1 and Th2 cell differentiation);04659(Th17 cell differentiation);05132(Salmonella infection);05140(Leishmaniasis);05142(Chagas disease (American trypanosomiasis));05145(Toxoplasm…	NA
circRNA14065	inf	up	2.99186e-07	0.00337631	chr10	32543301	32584304	+	7	circRNA	ENST00000639629	CCDC7	chr10:32518505-32543300|chr10:32584304-32634254	coiled-coil domain containing 7 [Source:HGNC Symbol;Acc:HGNC:26533]	NA	NA	NA
circRNA23615	-inf	down	2.99843e-07	0.00347518	chr14	92014216	92033253	-	6	circRNA	ENST00000267622	TRIP11	chr14:92011795-92014215|chr14:92033253-92039547	thyroid hormone receptor interactor 11 [Source:HGNC Symbol;Acc:HGNC:12305]	GO:0000139(Golgi membrane);GO:0002079(inner acrosomal membrane);GO:0002080(acrosomal membrane);GO:0002081(outer acrosomal membrane);GO:0003281(ventricular septum development);GO:0003413(chondrocyte differentiation involved in endochondral bone morphogenesis);GO:0003713(transcription coactivator activity);GO:0005515(protein binding);GO:0005654(nucleoplasm);GO:0005737(cytoplasm);GO:0005793(endoplas…	NA	NA
hsa_circ_0107356	-inf	down	3.16929e-07	0.00376987	chr17	61965006	61968258	-	3	circRNA	ENST00000397786	MED13	chr17:61962971-61965005|chr17:61968258-61972726	mediator complex subunit 13 [Source:HGNC Symbol;Acc:HGNC:22474]	GO:0003712(transcription coregulator activity);GO:0003713(transcription coactivator activity);GO:0005634(nucleus);GO:0005654(nucleoplasm);GO:0006357(regulation of transcription by RNA polymerase II);GO:0006367(transcription initiation from RNA polymerase II promoter);GO:0016020(membrane);GO:0016592(mediator complex);GO:0030374(nuclear receptor transcription coactivator activity);GO:0042632(choles…	04919(Thyroid hormone signaling pathway)	NA
hsa_circ_0103284	inf	up	3.1021e-07	0.00378456	chr15	33153048	33155045	-	1	circRNA	ENST00000616417	FMN1	chr15:33088974-33153047|chr15:33155045-33180197	formin 1 [Source:HGNC Symbol;Acc:HGNC:3768]	GO:0003779(actin binding);GO:0005634(nucleus);GO:0005737(cytoplasm);GO:0005789(endoplasmic reticulum membrane);GO:0005884(actin filament);GO:0005886(plasma membrane);GO:0005912(adherens junction);GO:0008017(microtubule binding);GO:0010467(gene expression);GO:0016020(membrane);GO:0017124(SH3 domain binding);GO:0030054(cell junction);GO:0030838(positive regulation of actin filament polymerization);…	NA	NA
circRNA9611	inf	up	3.29036e-07	0.0041146	chr7	94407848	94409420	+	5	circRNA	ENST00000620463	COL1A2	chr7:94406303-94407847|chr7:94409420-94409564	collagen type I alpha 2 chain [Source:HGNC Symbol;Acc:HGNC:2198]	GO:0001501(skeletal system development);GO:0001568(blood vessel development);GO:0002020(protease binding);GO:0005201(extracellular matrix structural constituent);GO:0005515(protein binding);GO:0005576(extracellular region);GO:0005581(collagen trimer);GO:0005584(collagen type I trimer);GO:0005615(extracellular space);GO:0005783(endoplasmic reticulum);GO:0005788(endoplasmic reticulum lumen);GO:0007…	04151(PI3K-Akt signaling pathway);04510(Focal adhesion);04512(ECM-receptor interaction);04611(Platelet activation);04926(Relaxin signaling pathway);04933(AGE-RAGE signaling pathway in diabetic complications);04974(Protein digestion and absorption);05146(Amoebiasis);05165(Human papillomavirus infection)	NA
hsa_circ_0113889	-inf	down	3.2342e-07	0.00414302	chr1	64629355	64641969	+	4	circRNA	ENST00000651257	CACHD1	chr1:64602912-64629354|chr1:64641969-64647800	cache domain containing 1 [Source:HGNC Symbol;Acc:HGNC:29314]	GO:0005245(voltage-gated calcium channel activity);GO:0005891(voltage-gated calcium channel complex);GO:0006811(ion transport);GO:0006816(calcium ion transport);GO:0016020(membrane);GO:0016021(integral component of membrane);GO:0070588(calcium ion transmembrane transport)	NA	NA
hsa_circ_0008283	2.70734	up	3.20365e-07	0.00420159	chr17	37440505	37465541	+	6	circRNA	ENST00000615182	TADA2A	chr17:37437829-37440504|chr17:37465541-37467453	transcriptional adaptor 2A [Source:HGNC Symbol;Acc:HGNC:11531]	GO:0000278(mitotic cell cycle);GO:0001932(regulation of protein phosphorylation);GO:0003677(DNA binding);GO:0003713(transcription coactivator activity);GO:0005515(protein binding);GO:0005634(nucleus);GO:0005671(Ada2/Gcn5/Ada3 transcription activator complex);GO:0006357(regulation of transcription by RNA polymerase II);GO:0031063(regulation of histone deacetylation);GO:0031647(regulation of protei…	NA	NA
hsa_circ_0133922	-inf	down	3.3789e-07	0.00453448	chr7	19811245	19814346	+	1	intergenic	intergenic_circRNA	intergenic_circRNA	chr7:19811244-19814346	NA	NA	NA	NA
ciRNA350	inf	up	3.36602e-07	0.00461986	chr1	247155566	247159867	-	1	ciRNA	ENST00000472531	ZNF124	chr1:247155565-247159867	zinc finger protein 124 [Source:HGNC Symbol;Acc:HGNC:12907]	GO:0003676(nucleic acid binding);GO:0003677(DNA binding);GO:0003700(DNA-binding transcription factor activity);GO:0005515(protein binding);GO:0005634(nucleus);GO:0006355(regulation of transcription, DNA-templated);GO:0043565(sequence-specific DNA binding);GO:0046872(metal ion binding)	05168(Herpes simplex virus 1 infection)	NA
circRNA9233	inf	up	3.46551e-07	0.0048621	chr17	50188993	50189402	-	3	circRNA	ENST00000225964	COL1A1	chr17:50188795-50188903|chr17:50189538-50189679	collagen type I alpha 1 chain [Source:HGNC Symbol;Acc:HGNC:2197]	GO:0001501(skeletal system development);GO:0001503(ossification);GO:0001568(blood vessel development);GO:0001649(osteoblast differentiation);GO:0001957(intramembranous ossification);GO:0001958(endochondral ossification);GO:0002020(protease binding);GO:0005201(extracellular matrix structural constituent);GO:0005515(protein binding);GO:0005576(extracellular region);GO:0005581(collagen trimer);GO:00…	04151(PI3K-Akt signaling pathway);04510(Focal adhesion);04512(ECM-receptor interaction);04611(Platelet activation);04926(Relaxin signaling pathway);04933(AGE-RAGE signaling pathway in diabetic complications);04974(Protein digestion and absorption);05146(Amoebiasis);05165(Human papillomavirus infection)	NA
hsa_circ_0005649	-inf	down	3.48981e-07	0.00500264	chr5	65992710	66014725	+	5	circRNA	ENST00000284037	ERBIN	chr5:65988682-65992709|chr5:66014725-66021321	erbb2 interacting protein [Source:HGNC Symbol;Acc:HGNC:15842]	GO:0005102(signaling receptor binding);GO:0005176(ErbB-2 class receptor binding);GO:0005200(structural constituent of cytoskeleton);GO:0005515(protein binding);GO:0005604(basement membrane);GO:0005634(nucleus);GO:0005737(cytoplasm);GO:0005886(plasma membrane);GO:0006605(protein targeting);GO:0007155(cell adhesion);GO:0007165(signal transduction);GO:0007173(epidermal growth factor receptor signali…	04621(NOD-like receptor signaling pathway)	NA
hsa_circ_0013299	-inf	down	3.44168e-07	0.00503862	chr1	100007034	100017815	+	4	circRNA	ENST00000638371	SLC35A3	chr1:99999415-100007033|chr1:100017815-100027141	solute carrier family 35 member A3 [Source:HGNC Symbol;Acc:HGNC:11023]	GO:0000139(Golgi membrane);GO:0005459(UDP-galactose transmembrane transporter activity);GO:0005462(UDP-N-acetylglucosamine transmembrane transporter activity);GO:0005515(protein binding);GO:0005794(Golgi apparatus);GO:0006047(UDP-N-acetylglucosamine metabolic process);GO:0008643(carbohydrate transport);GO:0015165(pyrimidine nucleotide-sugar transmembrane transporter activity);GO:0016020(membrane)…	NA	NA
hsa_circ_0024169	inf	up	3.57511e-07	0.005343	chr11	108046270	108054955	+	5	circRNA	ENST00000393094	CUL5	chr11:108033911-108046269|chr11:108054955-108070095	cullin 5 [Source:HGNC Symbol;Acc:HGNC:2556]	GO:0000082(G1/S transition of mitotic cell cycle);GO:0004842(ubiquitin-protein transferase activity);GO:0005262(calcium channel activity);GO:0005515(protein binding);GO:0005829(cytosol);GO:0006511(ubiquitin-dependent protein catabolic process);GO:0016032(viral process);GO:0016567(protein ubiquitination);GO:0019005(SCF ubiquitin ligase complex);GO:0031146(SCF-dependent proteasomal ubiquitin-depend…	04120(Ubiquitin mediated proteolysis);05170(Human immunodeficiency virus 1 infection)	NA
ciRNA279	inf	up	3.73486e-07	0.00569567	chr1	179893173	179893496	+	1	ciRNA	ENST00000528443	TOR1AIP1	chr1:179893172-179893496	torsin 1A interacting protein 1 [Source:HGNC Symbol;Acc:HGNC:29456]	GO:0001671(ATPase activator activity);GO:0005515(protein binding);GO:0005521(lamin binding);GO:0005634(nucleus);GO:0005635(nuclear envelope);GO:0005637(nuclear inner membrane);GO:0008092(cytoskeletal protein binding);GO:0016020(membrane);GO:0016021(integral component of membrane);GO:0031965(nuclear membrane);GO:0032781(positive regulation of ATPase activity);GO:0034504(protein localization to nuc…	NA	NA
circRNA5903	inf	up	3.69678e-07	0.00575034	chr17	38361712	38377842	+	7	circRNA	ENST00000617360	SOCS7	chr17:38353032-38361711|chr17:38377842-38399513	suppressor of cytokine signaling 7 [Source:HGNC Symbol;Acc:HGNC:29846]	GO:0005515(protein binding);GO:0005634(nucleus);GO:0005737(cytoplasm);GO:0005829(cytosol);GO:0005886(plasma membrane);GO:0005942(phosphatidylinositol 3-kinase complex);GO:0008150(biological_process);GO:0008286(insulin receptor signaling pathway);GO:0009968(negative regulation of signal transduction);GO:0016020(membrane);GO:0016567(protein ubiquitination);GO:0017124(SH3 domain binding);GO:0021799(…	04630(Jak-STAT signaling pathway);04917(Prolactin signaling pathway)	NA
hsa_circ_0126678	inf	up	3.81708e-07	0.00605389	chr4	56371451	56384341	-	4	circRNA	ENST00000451613	AASDH	chr4:56355423-56371450|chr4:56384341-56387361	aminoadipate-semialdehyde dehydrogenase [Source:HGNC Symbol;Acc:HGNC:23993]	GO:0000166(nucleotide binding);GO:0003824(catalytic activity);GO:0005515(protein binding);GO:0005524(ATP binding);GO:0006629(lipid metabolic process);GO:0006631(fatty acid metabolic process);GO:0016874(ligase activity);GO:0016878(acid-thiol ligase activity);GO:0019482(beta-alanine metabolic process);GO:0043041(amino acid activation for nonribosomal peptide biosynthetic process)	NA	NA
circRNA303	-3.41157	down	3.78439e-07	0.00611747	chr12	70278132	70311017	+	2	circRNA	ENST00000229195	CNOT2	chr12:70243480-70278131|chr12:70311017-70319297	CCR4-NOT transcription complex subunit 2 [Source:HGNC Symbol;Acc:HGNC:7878]	GO:0000122(negative regulation of transcription by RNA polymerase II);GO:0000289(nuclear-transcribed mRNA poly(A) tail shortening);GO:0000932(P-body);GO:0001226(RNA polymerase II transcription corepressor binding);GO:0001829(trophectodermal cell differentiation);GO:0003712(transcription coregulator activity);GO:0004535(poly(A)-specific ribonuclease activity);GO:0005515(protein binding);GO:0005634…	03018(RNA degradation)	NA
circRNA9717	inf	up	3.98648e-07	0.00656574	chr12	23734685	23846193	-	4	circRNA	ENST00000367206	SOX5	chr12:23665564-23734684|chr12:23846193-23895793	SRY-box transcription factor 5 [Source:HGNC Symbol;Acc:HGNC:11201]	GO:0000790(nuclear chromatin);GO:0000976(transcription regulatory region sequence-specific DNA binding);GO:0000981(DNA-binding transcription factor activity, RNA polymerase II-specific);GO:0000987(cis-regulatory region sequence-specific DNA binding);GO:0001502(cartilage condensation);GO:0002062(chondrocyte differentiation);GO:0003677(DNA binding);GO:0003700(DNA-binding transcription factor activi…	NA	NA
hsa_circ_0114230	4.62362	up	3.92391e-07	0.00658236	chr1	7835762	7837149	+	2	circRNA	ENST00000613533	PER3	chr1:7830161-7835761|chr1:7837149-7842671	period circadian regulator 3 [Source:HGNC Symbol;Acc:HGNC:8847]	GO:0000122(negative regulation of transcription by RNA polymerase II);GO:0000976(transcription regulatory region sequence-specific DNA binding);GO:0001222(transcription corepressor binding);GO:0005515(protein binding);GO:0005634(nucleus);GO:0005737(cytoplasm);GO:0007623(circadian rhythm);GO:0008134(transcription factor binding);GO:0009416(response to light stimulus);GO:0019900(kinase binding);GO:…	04710(Circadian rhythm);04713(Circadian entrainment)	NA
circRNA23886	-inf	down	3.98809e-07	0.00681165	chr14	103003929	103012188	-	3	circRNA	ENST00000361246	CDC42BPB	chr14:102999713-103003928|chr14:103012188-103056999	CDC42 binding protein kinase beta [Source:HGNC Symbol;Acc:HGNC:1738]	GO:0000166(nucleotide binding);GO:0000287(magnesium ion binding);GO:0004672(protein kinase activity);GO:0004674(protein serine/threonine kinase activity);GO:0005524(ATP binding);GO:0005737(cytoplasm);GO:0005856(cytoskeleton);GO:0005886(plasma membrane);GO:0005911(cell-cell junction);GO:0006468(protein phosphorylation);GO:0007010(cytoskeleton organization);GO:0007163(establishment or maintenance o…	NA	EC:2.7.11.1
circRNA9614	inf	up	3.94556e-07	0.00685936	chr7	94412608	94413743	+	3	circRNA	ENST00000620463	COL1A2	chr7:94412121-94412584|chr7:94413743-94413894	collagen type I alpha 2 chain [Source:HGNC Symbol;Acc:HGNC:2198]	GO:0001501(skeletal system development);GO:0001568(blood vessel development);GO:0002020(protease binding);GO:0005201(extracellular matrix structural constituent);GO:0005515(protein binding);GO:0005576(extracellular region);GO:0005581(collagen trimer);GO:0005584(collagen type I trimer);GO:0005615(extracellular space);GO:0005783(endoplasmic reticulum);GO:0005788(endoplasmic reticulum lumen);GO:0007…	04151(PI3K-Akt signaling pathway);04510(Focal adhesion);04512(ECM-receptor interaction);04611(Platelet activation);04926(Relaxin signaling pathway);04933(AGE-RAGE signaling pathway in diabetic complications);04974(Protein digestion and absorption);05146(Amoebiasis);05165(Human papillomavirus infection)	NA
circRNA14404	inf	up	4.03706e-07	0.00714156	chr2	188992888	188993459	+	2	circRNA	ENST00000317840	COL3A1	chr2:188992228-188992887|chr2:188993459-188994038	collagen type III alpha 1 chain [Source:HGNC Symbol;Acc:HGNC:2201]	GO:0001501(skeletal system development);GO:0001568(blood vessel development);GO:0002020(protease binding);GO:0005178(integrin binding);GO:0005201(extracellular matrix structural constituent);GO:0005515(protein binding);GO:0005576(extracellular region);GO:0005581(collagen trimer);GO:0005586(collagen type III trimer);GO:0005615(extracellular space);GO:0005788(endoplasmic reticulum lumen);GO:0007160…	04611(Platelet activation);04926(Relaxin signaling pathway);04933(AGE-RAGE signaling pathway in diabetic complications);04974(Protein digestion and absorption);05146(Amoebiasis)	NA
hsa_circ_0006662	-5.23676	down	3.99451e-07	0.00718812	chr2	190900564	190905167	+	3	circRNA	ENST00000320717	GLS	chr2:190895725-190900563|chr2:190905167-190910262	glutaminase [Source:HGNC Symbol;Acc:HGNC:4331]	GO:0001967(suckling behavior);GO:0002087(regulation of respiratory gaseous exchange by nervous system process);GO:0004359(glutaminase activity);GO:0005515(protein binding);GO:0005737(cytoplasm);GO:0005739(mitochondrion);GO:0005759(mitochondrial matrix);GO:0005829(cytosol);GO:0006537(glutamate biosynthetic process);GO:0006541(glutamine metabolic process);GO:0006543(glutamine catabolic process);GO:…	00220(Arginine biosynthesis);00250(Alanine, aspartate and glutamate metabolism);00471(D-Glutamine and D-glutamate metabolism);04724(Glutamatergic synapse);04727(GABAergic synapse);04964(Proximal tubule bicarbonate reclamation);05206(MicroRNAs in cancer);05230(Central carbon metabolism in cancer)	NA
hsa_circ_0047003	2.70491	up	3.94662e-07	0.00722232	chr18	12999421	13059312	+	20	circRNA	ENST00000506447	CEP192	chr18:12991437-12999420|chr18:13059312-13067830	centrosomal protein 192 [Source:HGNC Symbol;Acc:HGNC:25515]	GO:0000086(G2/M transition of mitotic cell cycle);GO:0000242(pericentriolar material);GO:0005515(protein binding);GO:0005737(cytoplasm);GO:0005813(centrosome);GO:0005814(centriole);GO:0005829(cytosol);GO:0005856(cytoskeleton);GO:0009617(response to bacterium);GO:0010389(regulation of G2/M transition of mitotic cell cycle);GO:0010923(negative regulation of phosphatase activity);GO:0019902(phosphat…	NA	NA
hsa_circ_0013387	3.34719	up	4.23496e-07	0.00787915	chr1	108885275	108924214	+	13	circRNA	ENST00000406462	GPSM2	chr1:108877228-108885274|chr1:108924214-108929700	G protein signaling modulator 2 [Source:HGNC Symbol;Acc:HGNC:29501]	GO:0000132(establishment of mitotic spindle orientation);GO:0000166(nucleotide binding);GO:0000922(spindle pole);GO:0001965(G-protein alpha-subunit binding);GO:0005092(GDP-dissociation inhibitor activity);GO:0005515(protein binding);GO:0005737(cytoplasm);GO:0005813(centrosome);GO:0005829(cytosol);GO:0005856(cytoskeleton);GO:0005886(plasma membrane);GO:0005938(cell cortex);GO:0007049(cell cycle);G…	NA	NA
circRNA28208	-inf	down	4.34114e-07	0.0082091	chr3	138570319	138572932	-	4	circRNA	ENST00000478673	CEP70	chr3:138537347-138570318|chr3:138572932-138591854	centrosomal protein 70 [Source:HGNC Symbol;Acc:HGNC:29972]	GO:0000086(G2/M transition of mitotic cell cycle);GO:0005515(protein binding);GO:0005737(cytoplasm);GO:0005813(centrosome);GO:0005815(microtubule organizing center);GO:0005829(cytosol);GO:0005856(cytoskeleton);GO:0010389(regulation of G2/M transition of mitotic cell cycle);GO:0042802(identical protein binding);GO:0043015(gamma-tubulin binding);GO:0060271(cilium assembly);GO:0070507(regulation of …	NA	NA
circRNA5959	1.84499	up	4.27846e-07	0.00822106	chr2	201145379	201149835	+	3	circRNA	ENST00000474842	CFLAR	chr2:201140439-201145378|chr2:201149835-201160432	CASP8 and FADD like apoptosis regulator [Source:HGNC Symbol;Acc:HGNC:1876]	GO:0001666(response to hypoxia);GO:0002020(protease binding);GO:0004197(cysteine-type endopeptidase activity);GO:0005123(death receptor binding);GO:0005515(protein binding);GO:0005737(cytoplasm);GO:0005829(cytosol);GO:0006508(proteolysis);GO:0006915(apoptotic process);GO:0006919(activation of cysteine-type endopeptidase activity involved in apoptotic process);GO:0007519(skeletal muscle tissue dev…	04064(NF-kappa B signaling pathway);04140(Autophagy - animal);04210(Apoptosis);04217(Necroptosis);04668(TNF signaling pathway);05142(Chagas disease (American trypanosomiasis));05160(Hepatitis C)	NA
circRNA5857	inf	up	4.21867e-07	0.00823484	chr18	54271361	54274090	+	2	circRNA	ENST00000583136	POLI	chr18:54270032-54271360|chr18:54274090-54277703	DNA polymerase iota [Source:HGNC Symbol;Acc:HGNC:9182]	GO:0003677(DNA binding);GO:0003684(damaged DNA binding);GO:0003887(DNA-directed DNA polymerase activity);GO:0005515(protein binding);GO:0005622(intracellular);GO:0005634(nucleus);GO:0005654(nucleoplasm);GO:0006260(DNA replication);GO:0006281(DNA repair);GO:0006974(cellular response to DNA damage stimulus);GO:0016607(nuclear speck);GO:0016740(transferase activity);GO:0016779(nucleotidyltransferase…	03460(Fanconi anemia pathway)	EC:2.7.7.7
circRNA14149	inf	up	4.1779e-07	0.0082827	chr17	50196635	50197757	-	4	circRNA	ENST00000495677	COL1A1	chr17:50196528-50196617|chr17:50197785-50197949	collagen type I alpha 1 chain [Source:HGNC Symbol;Acc:HGNC:2197]	GO:0001501(skeletal system development);GO:0001503(ossification);GO:0001568(blood vessel development);GO:0001649(osteoblast differentiation);GO:0001957(intramembranous ossification);GO:0001958(endochondral ossification);GO:0002020(protease binding);GO:0005201(extracellular matrix structural constituent);GO:0005515(protein binding);GO:0005576(extracellular region);GO:0005581(collagen trimer);GO:00…	04151(PI3K-Akt signaling pathway);04510(Focal adhesion);04512(ECM-receptor interaction);04611(Platelet activation);04926(Relaxin signaling pathway);04933(AGE-RAGE signaling pathway in diabetic complications);04974(Protein digestion and absorption);05146(Amoebiasis);05165(Human papillomavirus infection)	NA
circRNA5390	inf	up	4.28763e-07	0.00863099	chr2	189009191	189010672	-	1	intergenic	intergenic_circRNA	intergenic_circRNA	chr2:189009190-189010672	NA	NA	NA	NA
circRNA16824	inf	up	4.31157e-07	0.0088107	chr7	94412069	94413743	+	4	circRNA	ENST00000620463	COL1A2	chr7:94411154-94412068|chr7:94413743-94413894	collagen type I alpha 2 chain [Source:HGNC Symbol;Acc:HGNC:2198]	GO:0001501(skeletal system development);GO:0001568(blood vessel development);GO:0002020(protease binding);GO:0005201(extracellular matrix structural constituent);GO:0005515(protein binding);GO:0005576(extracellular region);GO:0005581(collagen trimer);GO:0005584(collagen type I trimer);GO:0005615(extracellular space);GO:0005783(endoplasmic reticulum);GO:0005788(endoplasmic reticulum lumen);GO:0007…	04151(PI3K-Akt signaling pathway);04510(Focal adhesion);04512(ECM-receptor interaction);04611(Platelet activation);04926(Relaxin signaling pathway);04933(AGE-RAGE signaling pathway in diabetic complications);04974(Protein digestion and absorption);05146(Amoebiasis);05165(Human papillomavirus infection)	NA
circRNA9327	inf	up	4.2542e-07	0.00882322	chr9	134738759	134750867	-	1	intergenic	intergenic_circRNA	intergenic_circRNA	chr9:134738758-134750867	NA	NA	NA	NA
hsa_circ_0000558	inf	up	4.30775e-07	0.00906565	chr14	89161701	89162969	-	1	intergenic	intergenic_circRNA	intergenic_circRNA	chr14:89161700-89162969	NA	NA	NA	NA
circRNA9609	inf	up	4.40746e-07	0.00940993	chr7	94394915	94400277	+	5	circRNA	ENST00000620463	COL1A2	chr7:94400288-94401567	collagen type I alpha 2 chain [Source:HGNC Symbol;Acc:HGNC:2198]	GO:0001501(skeletal system development);GO:0001568(blood vessel development);GO:0002020(protease binding);GO:0005201(extracellular matrix structural constituent);GO:0005515(protein binding);GO:0005576(extracellular region);GO:0005581(collagen trimer);GO:0005584(collagen type I trimer);GO:0005615(extracellular space);GO:0005783(endoplasmic reticulum);GO:0005788(endoplasmic reticulum lumen);GO:0007…	04151(PI3K-Akt signaling pathway);04510(Focal adhesion);04512(ECM-receptor interaction);04611(Platelet activation);04926(Relaxin signaling pathway);04933(AGE-RAGE signaling pathway in diabetic complications);04974(Protein digestion and absorption);05146(Amoebiasis);05165(Human papillomavirus infection)	NA
circRNA16537	inf	up	4.41935e-07	0.0095701	chr17	50195233	50195478	-	2	circRNA	ENST00000471344	COL1A1	chr17:50195100-50195232|chr17:50195478-50195567	collagen type I alpha 1 chain [Source:HGNC Symbol;Acc:HGNC:2197]	GO:0001501(skeletal system development);GO:0001503(ossification);GO:0001568(blood vessel development);GO:0001649(osteoblast differentiation);GO:0001957(intramembranous ossification);GO:0001958(endochondral ossification);GO:0002020(protease binding);GO:0005201(extracellular matrix structural constituent);GO:0005515(protein binding);GO:0005576(extracellular region);GO:0005581(collagen trimer);GO:00…	04151(PI3K-Akt signaling pathway);04510(Focal adhesion);04512(ECM-receptor interaction);04611(Platelet activation);04926(Relaxin signaling pathway);04933(AGE-RAGE signaling pathway in diabetic complications);04974(Protein digestion and absorption);05146(Amoebiasis);05165(Human papillomavirus infection)	NA
hsa_circ_0104765	-inf	down	4.41861e-07	0.00970327	chr15	83923904	83943082	+	3	circRNA	ENST00000567476	ADAMTSL3	chr15:83913378-83923903|chr15:83943082-83970483	ADAMTS like 3 [Source:HGNC Symbol;Acc:HGNC:14633]	GO:0004222(metalloendopeptidase activity);GO:0005515(protein binding);GO:0005576(extracellular region);GO:0006508(proteolysis);GO:0008233(peptidase activity);GO:0030198(extracellular matrix organization);GO:0031012(extracellular matrix);GO:0043231(intracellular membrane-bounded organelle)	NA	NA
hsa_circ_0057582	inf	up	4.51794e-07	0.0100592	chr2	196271193	196308085	-	7	circRNA	ENST00000260983	HECW2	chr2:196257906-196271192|chr2:196308085-196317273	HECT, C2 and WW domain containing E3 ubiquitin protein ligase 2 [Source:HGNC Symbol;Acc:HGNC:29853]	GO:0000209(protein polyubiquitination);GO:0004842(ubiquitin-protein transferase activity);GO:0005515(protein binding);GO:0005737(cytoplasm);GO:0005819(spindle);GO:0005856(cytoskeleton);GO:0006511(ubiquitin-dependent protein catabolic process);GO:0016567(protein ubiquitination);GO:0016740(transferase activity);GO:0030071(regulation of mitotic metaphase/anaphase transition);GO:0043161(proteasome-me…	NA	EC:2.3.2.26
circRNA4667	inf	up	4.49763e-07	0.0101512	chr9	14146689	14307520	-	5	circRNA	ENST00000380959	NFIB	chr9:14125766-14146688|chr9:14307520-14313481	nuclear factor I B [Source:HGNC Symbol;Acc:HGNC:7785]	GO:0000122(negative regulation of transcription by RNA polymerase II);GO:0000790(nuclear chromatin);GO:0000978(RNA polymerase II cis-regulatory region sequence-specific DNA binding);GO:0000981(DNA-binding transcription factor activity, RNA polymerase II-specific);GO:0001228(DNA-binding transcription activator activity, RNA polymerase II-specific);GO:0001650(fibrillar center);GO:0002062(chondrocyt…	NA	NA
circRNA5998	inf	up	4.75226e-07	0.0108708	chr6	168509916	168549203	+	6	circRNA	ENST00000356284	SMOC2	chr6:168441454-168509915|chr6:168549203-168598818	SPARC related modular calcium binding 2 [Source:HGNC Symbol;Acc:HGNC:20323]	GO:0005509(calcium ion binding);GO:0005515(protein binding);GO:0005539(glycosaminoglycan binding);GO:0005576(extracellular region);GO:0005604(basement membrane);GO:0005614(interstitial matrix);GO:0005615(extracellular space);GO:0008201(heparin binding);GO:0010595(positive regulation of endothelial cell migration);GO:0010811(positive regulation of cell-substrate adhesion);GO:0016020(membrane);GO:0…	NA	NA
hsa_circ_0006614	4.19378	up	4.70436e-07	0.0109047	chr3	183775915	183790980	+	4	circRNA	ENST00000305135	YEATS2	chr3:183773794-183775914|chr3:183790980-183797922	YEATS domain containing 2 [Source:HGNC Symbol;Acc:HGNC:25489]	GO:0000122(negative regulation of transcription by RNA polymerase II);GO:0005515(protein binding);GO:0005634(nucleus);GO:0005671(Ada2/Gcn5/Ada3 transcription activator complex);GO:0006355(regulation of transcription, DNA-templated);GO:0017025(TBP-class protein binding);GO:0042393(histone binding);GO:0043966(histone H3 acetylation);GO:0045892(negative regulation of transcription, DNA-templated);GO…	NA	NA
hsa_circ_0110303	inf	up	4.68518e-07	0.0110031	chr1	107748968	107772843	-	11	circRNA	ENST00000370056	VAV3	chr1:107705061-107748967|chr1:107772843-107777230	vav guanine nucleotide exchange factor 3 [Source:HGNC Symbol;Acc:HGNC:12659]	GO:0001525(angiogenesis);GO:0001772(immunological synapse);GO:0005085(guanyl-nucleotide exchange factor activity);GO:0005089(Rho guanyl-nucleotide exchange factor activity);GO:0005096(GTPase activator activity);GO:0005154(epidermal growth factor receptor binding);GO:0005515(protein binding);GO:0005737(cytoplasm);GO:0005829(cytosol);GO:0005886(plasma membrane);GO:0006906(vesicle fusion);GO:0006974…	04024(cAMP signaling pathway);04062(Chemokine signaling pathway);04510(Focal adhesion);04650(Natural killer cell mediated cytotoxicity);04660(T cell receptor signaling pathway);04662(B cell receptor signaling pathway);04664(Fc epsilon RI signaling pathway);04666(Fc gamma R-mediated phagocytosis);04670(Leukocyte transendothelial migration);04810(Regulation of actin cytoskeleton)	NA
circRNA5813	inf	up	4.69899e-07	0.0111789	chr22	46974291	46997709	+	2	circRNA	ENST00000406733	TBC1D22A	chr22:46912188-46974290|chr22:46997709-47037071	TBC1 domain family member 22A [Source:HGNC Symbol;Acc:HGNC:1309]	GO:0005096(GTPase activator activity);GO:0005515(protein binding);GO:0006886(intracellular protein transport);GO:0017137(Rab GTPase binding);GO:0042803(protein homodimerization activity);GO:0071889(14-3-3 protein binding);GO:0090630(activation of GTPase activity)	NA	NA
circRNA5863	3.72033	up	4.7838e-07	0.0115266	chr7	94407848	94408823	+	4	circRNA	ENST00000620463	COL1A2	chr7:94406303-94407847|chr7:94408823-94409322	collagen type I alpha 2 chain [Source:HGNC Symbol;Acc:HGNC:2198]	GO:0001501(skeletal system development);GO:0001568(blood vessel development);GO:0002020(protease binding);GO:0005201(extracellular matrix structural constituent);GO:0005515(protein binding);GO:0005576(extracellular region);GO:0005581(collagen trimer);GO:0005584(collagen type I trimer);GO:0005615(extracellular space);GO:0005783(endoplasmic reticulum);GO:0005788(endoplasmic reticulum lumen);GO:0007…	04151(PI3K-Akt signaling pathway);04510(Focal adhesion);04512(ECM-receptor interaction);04611(Platelet activation);04926(Relaxin signaling pathway);04933(AGE-RAGE signaling pathway in diabetic complications);04974(Protein digestion and absorption);05146(Amoebiasis);05165(Human papillomavirus infection)	NA
circRNA26728	-inf	down	4.91145e-07	0.0119839	chr2	169603643	169608758	+	6	circRNA	ENST00000414307	PPIG	chr2:169584899-169603642|chr2:169608758-169614464	peptidylprolyl isomerase G [Source:HGNC Symbol;Acc:HGNC:14650]	GO:0000413(protein peptidyl-prolyl isomerization);GO:0003723(RNA binding);GO:0003755(peptidyl-prolyl cis-trans isomerase activity);GO:0005515(protein binding);GO:0005634(nucleus);GO:0005654(nucleoplasm);GO:0005737(cytoplasm);GO:0005829(cytosol);GO:0006457(protein folding);GO:0008380(RNA splicing);GO:0016018(cyclosporin A binding);GO:0016363(nuclear matrix);GO:0016607(nuclear speck);GO:0016853(iso…	NA	EC:5.2.1.8
circRNA1015	-2.66022	down	4.86928e-07	0.0120296	chr17	46066537	46094701	-	4	circRNA	ENST00000432791	KANSL1	chr17:46050704-46066536|chr17:46094701-46170854	KAT8 regulatory NSL complex subunit 1 [Source:HGNC Symbol;Acc:HGNC:24565]	GO:0000123(histone acetyltransferase complex);GO:0000775(chromosome, centromeric region);GO:0000776(kinetochore);GO:0000777(condensed chromosome kinetochore);GO:0005515(protein binding);GO:0005634(nucleus);GO:0005654(nucleoplasm);GO:0005694(chromosome);GO:0006325(chromatin organization);GO:0035035(histone acetyltransferase binding);GO:0043981(histone H4-K5 acetylation);GO:0043982(histone H4-K8 ac…	NA	NA
circRNA18569	-5.72066	down	4.91679e-07	0.0122969	chr15	75854387	75883424	+	8	circRNA	ENST00000561851	UBE2Q2	chr15:75844485-75854386|chr15:75883424-75890435	ubiquitin conjugating enzyme E2 Q2 [Source:HGNC Symbol;Acc:HGNC:19248]	GO:0000166(nucleotide binding);GO:0000209(protein polyubiquitination);GO:0004842(ubiquitin-protein transferase activity);GO:0005524(ATP binding);GO:0005634(nucleus);GO:0005737(cytoplasm);GO:0005829(cytosol);GO:0016567(protein ubiquitination);GO:0016740(transferase activity);GO:0061631(ubiquitin conjugating enzyme activity);GO:0070936(protein K48-linked ubiquitination)	04120(Ubiquitin mediated proteolysis)	EC:2.3.2.23
hsa_circ_0135834	-inf	down	4.85913e-07	0.0123009	chr8	134812610	134813169	-	1	intergenic	intergenic_circRNA	intergenic_circRNA	chr8:134812609-134813169	NA	NA	NA	NA
hsa_circ_0013617	4.27448	up	4.82933e-07	0.0123727	chr1	113940382	113941459	+	1	circRNA	ENST00000426820	HIPK1	chr1:113929532-113940381|chr1:113941459-113952765	homeodomain interacting protein kinase 1 [Source:HGNC Symbol;Acc:HGNC:19006]	GO:0000166(nucleotide binding);GO:0001654(eye development);GO:0003677(DNA binding);GO:0004672(protein kinase activity);GO:0004674(protein serine/threonine kinase activity);GO:0004713(protein tyrosine kinase activity);GO:0005515(protein binding);GO:0005524(ATP binding);GO:0005634(nucleus);GO:0005654(nucleoplasm);GO:0005737(cytoplasm);GO:0005813(centrosome);GO:0005829(cytosol);GO:0006468(protein ph…	04218(Cellular senescence)	EC:2.7.11.1
hsa_circ_0023475	-3.87737	down	4.91178e-07	0.0127338	chr11	72867865	72889945	-	3	circRNA	ENST00000311172	FCHSD2	chr11:72849889-72867864|chr11:72889945-72902542	FCH and double SH3 domains 2 [Source:HGNC Symbol;Acc:HGNC:29114]	GO:0005515(protein binding);GO:0005547(phosphatidylinositol-3,4,5-trisphosphate binding);GO:0005737(cytoplasm);GO:0005886(plasma membrane);GO:0005905(clathrin-coated pit);GO:0006897(endocytosis);GO:0007274(neuromuscular synaptic transmission);GO:0008289(lipid binding);GO:0015031(protein transport);GO:0016020(membrane);GO:0030054(cell junction);GO:0030833(regulation of actin filament polymerizatio…	NA	NA
circRNA5743	4.4493	up	4.8771e-07	0.0127926	chr12	47984547	47985587	-	3	circRNA	ENST00000337299	COL2A1	chr12:47984140-47984546|chr12:47985587-47985728	collagen type II alpha 1 chain [Source:HGNC Symbol;Acc:HGNC:2200]	GO:0001501(skeletal system development);GO:0001502(cartilage condensation);GO:0001503(ossification);GO:0001894(tissue homeostasis);GO:0001958(endochondral ossification);GO:0002062(chondrocyte differentiation);GO:0003007(heart morphogenesis);GO:0005201(extracellular matrix structural constituent);GO:0005515(protein binding);GO:0005576(extracellular region);GO:0005581(collagen trimer);GO:0005585(co…	04151(PI3K-Akt signaling pathway);04510(Focal adhesion);04512(ECM-receptor interaction);04974(Protein digestion and absorption);05165(Human papillomavirus infection)	NA
hsa_circ_0001316	3.49001	up	4.89818e-07	0.0129973	chr3	56669700	56673725	-	4	circRNA	ENST00000493960	TASOR	chr3:56668558-56669699|chr3:56673725-56682675	transcription activation suppressor [Source:HGNC Symbol;Acc:HGNC:30314]	GO:0000792(heterochromatin);GO:0001701(in utero embryonic development);GO:0003682(chromatin binding);GO:0003723(RNA binding);GO:0005515(protein binding);GO:0005634(nucleus);GO:0005654(nucleoplasm);GO:0005694(chromosome);GO:0045814(negative regulation of gene expression, epigenetic);GO:0045869(negative regulation of single stranded viral RNA replication via double stranded DNA intermediate);GO:009…	NA	NA
circRNA14322	inf	up	4.87614e-07	0.0130876	chr5	136147833	136154163	+	2	circRNA	ENST00000509297	SMAD5	chr5:136133959-136147832|chr5:136154163-136160856	SMAD family member 5 [Source:HGNC Symbol;Acc:HGNC:6771]	GO:0000122(negative regulation of transcription by RNA polymerase II);GO:0000790(nuclear chromatin);GO:0000977(RNA polymerase II regulatory region sequence-specific DNA binding);GO:0000978(RNA polymerase II cis-regulatory region sequence-specific DNA binding);GO:0000981(DNA-binding transcription factor activity, RNA polymerase II-specific);GO:0001227(DNA-binding transcription repressor activity, …	04350(TGF-beta signaling pathway);04550(Signaling pathways regulating pluripotency of stem cells)	NA
circRNA29643	-inf	down	4.86585e-07	0.0132083	chr16	56633751	56636504	+	1	intergenic	intergenic_circRNA	intergenic_circRNA	chr16:56633750-56636504	NA	NA	NA	NA
ciRNA2838	-inf	down	4.82673e-07	0.0132494	chr10	70121899	70123244	-	1	ciRNA	ENST00000373248	AIFM2	chr10:70121898-70123244	apoptosis inducing factor mitochondria associated 2 [Source:HGNC Symbol;Acc:HGNC:21411]	GO:0003677(DNA binding);GO:0004174(electron-transferring-flavoprotein dehydrogenase activity);GO:0005515(protein binding);GO:0005615(extracellular space);GO:0005634(nucleus);GO:0005737(cytoplasm);GO:0005739(mitochondrion);GO:0005741(mitochondrial outer membrane);GO:0005811(lipid droplet);GO:0005829(cytosol);GO:0005886(plasma membrane);GO:0006743(ubiquinone metabolic process);GO:0008637(apoptotic …	04115(p53 signaling pathway)	NA
circRNA9279	inf	up	4.9129e-07	0.0136358	chr11	65499689	65500063	+	1	intergenic	intergenic_circRNA	intergenic_circRNA	chr11:65499688-65500063	NA	NA	NA	NA
circRNA12168	inf	up	5.09384e-07	0.0142933	chr11	65499048	65499305	+	1	circRNA	ENST00000620902	MALAT1	chr11:65499305-65499619	metastasis associated lung adenocarcinoma transcript 1 [Source:HGNC Symbol;Acc:HGNC:29665]	NA	NA	NA
circRNA5676	-3.74814	down	5.15625e-07	0.0146257	chr2	120073179	120078581	+	7	circRNA	ENST00000452780	EPB41L5	chr2:120042110-120073178|chr2:120078581-120087171	erythrocyte membrane protein band 4.1 like 5 [Source:HGNC Symbol;Acc:HGNC:19819]	GO:0000904(cell morphogenesis involved in differentiation);GO:0001701(in utero embryonic development);GO:0001756(somitogenesis);GO:0001837(epithelial to mesenchymal transition);GO:0001839(neural plate morphogenesis);GO:0001954(positive regulation of cell-matrix adhesion);GO:0003382(epithelial cell morphogenesis);GO:0003383(apical constriction);GO:0005654(nucleoplasm);GO:0005737(cytoplasm);GO:0005…	NA	NA
circRNA1884	inf	up	5.12681e-07	0.0146986	chr22	16637040	16638740	+	2	circRNA	ENST00000400593	TPTEP1	chr22:16622897-16637039|chr22:16638740-16647167	TPTE pseudogene 1 [Source:HGNC Symbol;Acc:HGNC:43648]	NA	NA	NA
hsa_circ_0007477	-inf	down	5.20182e-07	0.0150723	chr4	105446383	105456745	-	4	circRNA	ENST00000341695	PPA2	chr4:105438036-105446382|chr4:105456745-105473893	inorganic pyrophosphatase 2 [Source:HGNC Symbol;Acc:HGNC:28883]	GO:0000287(magnesium ion binding);GO:0004427(inorganic diphosphatase activity);GO:0004722(protein serine/threonine phosphatase activity);GO:0005737(cytoplasm);GO:0005739(mitochondrion);GO:0005759(mitochondrial matrix);GO:0005829(cytosol);GO:0006418(tRNA aminoacylation for protein translation);GO:0006470(protein dephosphorylation);GO:0006796(phosphate-containing compound metabolic process);GO:0016…	00190(Oxidative phosphorylation)	EC:3.6.1.1
hsa_circ_0004222	-inf	down	5.23984e-07	0.0153423	chr1	12400181	12416827	+	5	circRNA	ENST00000620676	VPS13D	chr1:12386334-12400180|chr1:12416827-12455997	vacuolar protein sorting 13 homolog D [Source:HGNC Symbol;Acc:HGNC:23595]	GO:0005515(protein binding);GO:0006623(protein targeting to vacuole);GO:0007005(mitochondrion organization);GO:0019898(extrinsic component of membrane);GO:0045053(protein retention in Golgi apparatus);GO:0070062(extracellular exosome);GO:1901526(positive regulation of mitophagy)	NA	NA
hsa_circ_0002745	inf	up	5.20925e-07	0.0154116	chr5	170909661	170924550	+	7	circRNA	ENST00000389118	RANBP17	chr5:170896115-170909660|chr5:170924550-170953596	RAN binding protein 17 [Source:HGNC Symbol;Acc:HGNC:14428]	GO:0005049(nuclear export signal receptor activity);GO:0005525(GTP binding);GO:0005634(nucleus);GO:0005643(nuclear pore);GO:0005737(cytoplasm);GO:0006606(protein import into nucleus);GO:0006611(protein export from nucleus);GO:0006886(intracellular protein transport);GO:0008536(Ran GTPase binding);GO:0015031(protein transport);GO:0051028(mRNA transport)	NA	NA
circRNA5356	inf	up	5.30598e-07	0.0158596	chr11	65503906	65504103	+	1	intergenic	intergenic_circRNA	intergenic_circRNA	chr11:65503905-65504103	NA	NA	NA	NA
hsa_circ_0036997	inf	up	5.33092e-07	0.0160967	chr15	92996957	93002317	+	5	circRNA	ENST00000626874	CHD2	chr15:92992998-92996956|chr15:93002317-93004616	chromodomain helicase DNA binding protein 2 [Source:HGNC Symbol;Acc:HGNC:1917]	GO:0000166(nucleotide binding);GO:0000978(RNA polymerase II cis-regulatory region sequence-specific DNA binding);GO:0003677(DNA binding);GO:0003678(DNA helicase activity);GO:0003723(RNA binding);GO:0004386(helicase activity);GO:0005515(protein binding);GO:0005524(ATP binding);GO:0005634(nucleus);GO:0005654(nucleoplasm);GO:0005730(nucleolus);GO:0006325(chromatin organization);GO:0006357(regulation…	NA	NA
hsa_circ_0003929	inf	up	5.69314e-07	0.0173641	chr1	236859833	236863554	+	4	circRNA	ENST00000366577	MTR	chr1:236853088-236859832|chr1:236863554-236873772	5-methyltetrahydrofolate-homocysteine methyltransferase [Source:HGNC Symbol;Acc:HGNC:7468]	GO:0000096(sulfur amino acid metabolic process);GO:0005515(protein binding);GO:0005737(cytoplasm);GO:0005829(cytosol);GO:0007399(nervous system development);GO:0008168(methyltransferase activity);GO:0008270(zinc ion binding);GO:0008652(cellular amino acid biosynthetic process);GO:0008705(methionine synthase activity);GO:0009086(methionine biosynthetic process);GO:0009235(cobalamin metabolic proce…	00270(Cysteine and methionine metabolism);00450(Selenocompound metabolism);00670(One carbon pool by folate)	EC:2.1.1.13
circRNA26193	-inf	down	5.7987e-07	0.0178629	chr1	77717868	77718641	-	2	circRNA	ENST00000527390	USP33	chr1:77715868-77717867|chr1:77718641-77721172	ubiquitin specific peptidase 33 [Source:HGNC Symbol;Acc:HGNC:20059]	GO:0001664(G protein-coupled receptor binding);GO:0004197(cysteine-type endopeptidase activity);GO:0004843(thiol-dependent ubiquitin-specific protease activity);GO:0005515(protein binding);GO:0005654(nucleoplasm);GO:0005737(cytoplasm);GO:0005794(Golgi apparatus);GO:0005813(centrosome);GO:0005815(microtubule organizing center);GO:0005829(cytosol);GO:0005856(cytoskeleton);GO:0005925(focal adhesion)…	NA	EC:3.4.19.12
hsa_circ_0005576	-inf	down	5.75831e-07	0.0179141	chr1	22078429	22086866	+	4	circRNA	ENST00000648594	CDC42	chr1:22025639-22078428|chr1:22086866-22091427	cell division cycle 42 [Source:HGNC Symbol;Acc:HGNC:1736]	GO:0000139(Golgi membrane);GO:0000166(nucleotide binding);GO:0000322(storage vacuole);GO:0002040(sprouting angiogenesis);GO:0003161(cardiac conduction system development);GO:0003924(GTPase activity);GO:0005515(protein binding);GO:0005525(GTP binding);GO:0005737(cytoplasm);GO:0005789(endoplasmic reticulum membrane);GO:0005813(centrosome);GO:0005815(microtubule organizing center);GO:0005819(spindle…	04010(MAPK signaling pathway);04014(Ras signaling pathway);04015(Rap1 signaling pathway);04062(Chemokine signaling pathway);04144(Endocytosis);04360(Axon guidance);04370(VEGF signaling pathway);04510(Focal adhesion);04520(Adherens junction);04530(Tight junction);04660(T cell receptor signaling pathway);04666(Fc gamma R-mediated phagocytosis);04670(Leukocyte transendothelial migration);04722(Neuro…	NA
circRNA9238	inf	up	5.70279e-07	0.0179153	chr17	50194133	50194619	+	3	circRNA	ENST00000225964	COL1A1	chr17:50194041-50194130|chr17:50194626-50194721	collagen type I alpha 1 chain [Source:HGNC Symbol;Acc:HGNC:2197]	GO:0001501(skeletal system development);GO:0001503(ossification);GO:0001568(blood vessel development);GO:0001649(osteoblast differentiation);GO:0001957(intramembranous ossification);GO:0001958(endochondral ossification);GO:0002020(protease binding);GO:0005201(extracellular matrix structural constituent);GO:0005515(protein binding);GO:0005576(extracellular region);GO:0005581(collagen trimer);GO:00…	04151(PI3K-Akt signaling pathway);04510(Focal adhesion);04512(ECM-receptor interaction);04611(Platelet activation);04926(Relaxin signaling pathway);04933(AGE-RAGE signaling pathway in diabetic complications);04974(Protein digestion and absorption);05146(Amoebiasis);05165(Human papillomavirus infection)	NA
hsa_circ_0000707	1.32094	up	5.65349e-07	0.0179329	chr16	67036639	67082339	+	3	circRNA	ENST00000651988	CBFB	chr16:67029813-67036638|chr16:67082339-67098709	core-binding factor subunit beta [Source:HGNC Symbol;Acc:HGNC:1539]	GO:0000122(negative regulation of transcription by RNA polymerase II);GO:0000209(protein polyubiquitination);GO:0001503(ossification);GO:0001649(osteoblast differentiation);GO:0001959(regulation of cytokine-mediated signaling pathway);GO:0003677(DNA binding);GO:0003712(transcription coregulator activity);GO:0003713(transcription coactivator activity);GO:0005515(protein binding);GO:0005634(nucleus…	NA	NA
circRNA20951	-4.60344	down	5.64147e-07	0.0180668	chr2	112059978	112116203	+	18	circRNA	ENST00000650799	TMEM87B	chr2:112055756-112059977	transmembrane protein 87B [Source:HGNC Symbol;Acc:HGNC:25913]	GO:0000139(Golgi membrane);GO:0005794(Golgi apparatus);GO:0005829(cytosol);GO:0016020(membrane);GO:0016021(integral component of membrane);GO:0042147(retrograde transport, endosome to Golgi)	NA	NA
hsa_circ_0073716	2.26011	up	5.67712e-07	0.0183541	chr5	124639133	124701269	-	7	circRNA	ENST00000504926	ZNF608	chr5:124637906-124639132|chr5:124701269-124744412	zinc finger protein 608 [Source:HGNC Symbol;Acc:HGNC:29238]	GO:0000122(negative regulation of transcription by RNA polymerase II);GO:0003676(nucleic acid binding);GO:0005634(nucleus);GO:0006357(regulation of transcription by RNA polymerase II);GO:0046872(metal ion binding)	NA	NA
hsa_circ_0005959	inf	up	5.64769e-07	0.0184312	chr19	58294098	58295581	+	1	circRNA	ENST00000637233	AC020915	chr19:58286205-58294097|chr19:58295581-58306087	novel protein	GO:0003676(nucleic acid binding);GO:0006355(regulation of transcription, DNA-templated)	NA	NA
hsa_circ_0067347	-inf	down	5.60805e-07	0.0184729	chr3	131162408	131170887	+	4	circRNA	ENST00000510769	NEK11	chr3:131133956-131162407|chr3:131170887-131228527	NIMA related kinase 11 [Source:HGNC Symbol;Acc:HGNC:18593]	GO:0000166(nucleotide binding);GO:0004672(protein kinase activity);GO:0004674(protein serine/threonine kinase activity);GO:0005515(protein binding);GO:0005524(ATP binding);GO:0005634(nucleus);GO:0005654(nucleoplasm);GO:0005730(nucleolus);GO:0005737(cytoplasm);GO:0005813(centrosome);GO:0006468(protein phosphorylation);GO:0007049(cell cycle);GO:0007059(chromosome segregation);GO:0016301(kinase acti…	NA	EC:2.7.11.1
circRNA3077	1.73828	up	5.61311e-07	0.0186608	chr4	15625252	15644708	-	8	circRNA	ENST00000341285	FBXL5	chr4:15612414-15625251|chr4:15644708-15655203	F-box and leucine rich repeat protein 5 [Source:HGNC Symbol;Acc:HGNC:13602]	GO:0000151(ubiquitin ligase complex);GO:0000209(protein polyubiquitination);GO:0004842(ubiquitin-protein transferase activity);GO:0005506(iron ion binding);GO:0005515(protein binding);GO:0005737(cytoplasm);GO:0005829(cytosol);GO:0006511(ubiquitin-dependent protein catabolic process);GO:0006879(cellular iron ion homeostasis);GO:0016567(protein ubiquitination);GO:0019005(SCF ubiquitin ligase comple…	NA	NA
circRNA22919	-inf	down	5.57131e-07	0.0186917	chr2	171448681	171476950	+	7	circRNA	ENST00000468592	DCAF17	chr2:171443613-171448680|chr2:171476950-171477986	DDB1 and CUL4 associated factor 17 [Source:HGNC Symbol;Acc:HGNC:25784]	GO:0005515(protein binding);GO:0005634(nucleus);GO:0005654(nucleoplasm);GO:0005730(nucleolus);GO:0005829(cytosol);GO:0016020(membrane);GO:0016021(integral component of membrane);GO:0016567(protein ubiquitination);GO:0043687(post-translational protein modification);GO:0080008(Cul4-RING E3 ubiquitin ligase complex)	NA	NA
circRNA9218	inf	up	5.54662e-07	0.0187781	chr8	47407862	47440542	+	2	circRNA	ENST00000521214	SPIDR	chr8:47396626-47407861|chr8:47440542-47595811	scaffold protein involved in DNA repair [Source:HGNC Symbol;Acc:HGNC:28971]	GO:0000228(nuclear chromosome);GO:0000724(double-strand break repair via homologous recombination);GO:0005515(protein binding);GO:0005634(nucleus);GO:0005654(nucleoplasm);GO:0006281(DNA repair);GO:0006310(DNA recombination);GO:0006974(cellular response to DNA damage stimulus);GO:0010569(regulation of double-strand break repair via homologous recombination);GO:0031334(positive regulation of protei…	NA	NA
circRNA11112	inf	up	5.50862e-07	0.0188174	chr5	127523460	127539143	+	6	circRNA	ENST00000296666	PRRC1	chr5:127517776-127523459|chr5:127539143-127547818	proline rich coiled-coil 1 [Source:HGNC Symbol;Acc:HGNC:28164]	GO:0005515(protein binding);GO:0005737(cytoplasm);GO:0005794(Golgi apparatus);GO:0034199(activation of protein kinase A activity);GO:0034237(protein kinase A regulatory subunit binding);GO:0042802(identical protein binding)	NA	NA
ciRNA2777	-inf	down	5.5057e-07	0.0189754	chr5	115967990	115993854	+	1	ciRNA	ENST00000504467	LVRN	chr5:115967989-115993854	laeverin [Source:HGNC Symbol;Acc:HGNC:26904]	GO:0004177(aminopeptidase activity);GO:0005737(cytoplasm);GO:0005886(plasma membrane);GO:0006508(proteolysis);GO:0008233(peptidase activity);GO:0008237(metallopeptidase activity);GO:0008270(zinc ion binding);GO:0016020(membrane);GO:0016021(integral component of membrane);GO:0016787(hydrolase activity);GO:0042277(peptide binding);GO:0043171(peptide catabolic process);GO:0046872(metal ion binding);…	NA	NA
circRNA12463	inf	up	5.46216e-07	0.0189919	chr1	185214508	185231708	+	3	circRNA	ENST00000367500	SWT1	chr1:185206763-185214507|chr1:185231708-185271323	SWT1 RNA endoribonuclease homolog [Source:HGNC Symbol;Acc:HGNC:16785]	GO:0005634(nucleus)	NA	NA
circRNA26451	-inf	down	5.43203e-07	0.0190529	chr7	32632543	32656044	-	4	circRNA	ENST00000417811	DPY19L1P1	chr7:32623439-32632543|chr7:32656044-32675932	DPY19L1 pseudogene 1 [Source:HGNC Symbol;Acc:HGNC:22395]	NA	NA	NA
ciRNA722	inf	up	5.42954e-07	0.0192097	chr11	65425738	65425996	+	1	ciRNA	ENST00000616315	NEAT1	chr11:65425737-65426060	nuclear paraspeckle assembly transcript 1 [Source:HGNC Symbol;Acc:HGNC:30815]	NA	NA	NA
circRNA12488	inf	up	5.42417e-07	0.0193561	chr1	33294938	33295305	+	2	circRNA	ENST00000373428	ZNF362	chr1:33281811-33294937|chr1:33295305-33298930	zinc finger protein 362 [Source:HGNC Symbol;Acc:HGNC:18079]	GO:0003676(nucleic acid binding);GO:0003677(DNA binding);GO:0005634(nucleus);GO:0046872(metal ion binding)	NA	NA
circRNA5186	2.71063	up	5.4001e-07	0.0194349	chr19	39877664	39893527	-	8	circRNA	ENST00000616721	FCGBP	chr19:39877274-39877663|chr19:39893527-39893922	Fc fragment of IgG binding protein [Source:HGNC Symbol;Acc:HGNC:13572]	GO:0005515(protein binding)	NA	NA
circRNA22700	-inf	down	5.38306e-07	0.0195378	chr3	81577925	81586190	-	3	circRNA	ENST00000429644	GBE1	chr3:81537095-81577924|chr3:81586190-81591036	1,4-alpha-glucan branching enzyme 1 [Source:HGNC Symbol;Acc:HGNC:4180]	GO:0003824(catalytic activity);GO:0003844(1,4-alpha-glucan branching enzyme activity);GO:0004553(hydrolase activity, hydrolyzing O-glycosyl compounds);GO:0005515(protein binding);GO:0005737(cytoplasm);GO:0005829(cytosol);GO:0005975(carbohydrate metabolic process);GO:0005977(glycogen metabolic process);GO:0005978(glycogen biosynthetic process);GO:0006091(generation of precursor metabolites and ene…	00500(Starch and sucrose metabolism)	EC:2.4.1.18
circRNA15001	-3.84119	down	5.37039e-07	0.0196556	chr14	33215182	33676385	+	4	circRNA	ENST00000551634	NPAS3	chr14:32935003-33215181|chr14:33676385-33735213	neuronal PAS domain protein 3 [Source:HGNC Symbol;Acc:HGNC:19311]	GO:0000790(nuclear chromatin);GO:0000981(DNA-binding transcription factor activity, RNA polymerase II-specific);GO:0003677(DNA binding);GO:0005515(protein binding);GO:0005634(nucleus);GO:0005654(nucleoplasm);GO:0006355(regulation of transcription, DNA-templated);GO:0006357(regulation of transcription by RNA polymerase II);GO:0045893(positive regulation of transcription, DNA-templated);GO:0046982(…	NA	NA
hsa_circ_0003154	-4.99659	down	5.43907e-07	0.0200729	chr5	134741063	134744052	+	2	circRNA	ENST00000297156	CAMLG	chr5:134738792-134741062|chr5:134744052-134750758	calcium modulating ligand [Source:HGNC Symbol;Acc:HGNC:1471]	GO:0001881(receptor recycling);GO:0005515(protein binding);GO:0005737(cytoplasm);GO:0005783(endoplasmic reticulum);GO:0006952(defense response);GO:0007165(signal transduction);GO:0007173(epidermal growth factor receptor signaling pathway);GO:0016020(membrane);GO:0016021(integral component of membrane);GO:0016032(viral process);GO:0031397(negative regulation of protein ubiquitination);GO:0031625(u…	NA	NA
ciRNA2431	-3.7884	down	5.45142e-07	0.0202847	chr8	47394978	47407961	+	1	ciRNA	ENST00000541342	SPIDR	chr8:47394977-47407961	scaffold protein involved in DNA repair [Source:HGNC Symbol;Acc:HGNC:28971]	GO:0000228(nuclear chromosome);GO:0000724(double-strand break repair via homologous recombination);GO:0005515(protein binding);GO:0005634(nucleus);GO:0005654(nucleoplasm);GO:0006281(DNA repair);GO:0006310(DNA recombination);GO:0006974(cellular response to DNA damage stimulus);GO:0010569(regulation of double-strand break repair via homologous recombination);GO:0031334(positive regulation of protei…	NA	NA
hsa_circ_0098192	-inf	down	5.40876e-07	0.020291	chr12	24277216	24368639	-	2	circRNA	ENST00000646273	SOX5	chr12:24213417-24277215|chr12:24368639-24407484	SRY-box transcription factor 5 [Source:HGNC Symbol;Acc:HGNC:11201]	GO:0000790(nuclear chromatin);GO:0000976(transcription regulatory region sequence-specific DNA binding);GO:0000981(DNA-binding transcription factor activity, RNA polymerase II-specific);GO:0000987(cis-regulatory region sequence-specific DNA binding);GO:0001502(cartilage condensation);GO:0002062(chondrocyte differentiation);GO:0003677(DNA binding);GO:0003700(DNA-binding transcription factor activi…	NA	NA
hsa_circ_0042265	inf	up	5.47567e-07	0.020709	chr17	17884634	17893810	-	2	circRNA	ENST00000379504	TOM1L2	chr17:17882863-17884633|chr17:17893810-17898595	target of myb1 like 2 membrane trafficking protein [Source:HGNC Symbol;Acc:HGNC:11984]	GO:0005515(protein binding);GO:0006886(intracellular protein transport);GO:0007165(signal transduction);GO:0015031(protein transport);GO:0019901(protein kinase binding);GO:0030276(clathrin binding);GO:0045839(negative regulation of mitotic nuclear division);GO:0070062(extracellular exosome)	NA	NA
hsa_circ_0004662	-5.03966	down	5.45292e-07	0.0207892	chr6	159682474	159688242	-	3	circRNA	ENST00000367055	SOD2	chr6:159679298-159682473|chr6:159688242-159692660	superoxide dismutase 2 [Source:HGNC Symbol;Acc:HGNC:11180]	GO:0000302(response to reactive oxygen species);GO:0000303(response to superoxide);GO:0001306(age-dependent response to oxidative stress);GO:0001315(age-dependent response to reactive oxygen species);GO:0001666(response to hypoxia);GO:0001836(release of cytochrome c from mitochondria);GO:0001889(liver development);GO:0003032(detection of oxygen);GO:0003069(acetylcholine-mediated vasodilation invo…	04068(FoxO signaling pathway);04146(Peroxisome);04211(Longevity regulating pathway);04213(Longevity regulating pathway - multiple species);05016(Huntington disease)	EC:1.15.1.1
hsa_circ_0012906	-inf	down	5.46862e-07	0.0210159	chr1	66862147	66905375	-	6	circRNA	ENST00000371026	WDR78	chr1:66847678-66862146|chr1:66905375-66924661	WD repeat domain 78 [Source:HGNC Symbol;Acc:HGNC:26252]	GO:0002244(hematopoietic progenitor cell differentiation);GO:0003341(cilium movement);GO:0005515(protein binding);GO:0005858(axonemal dynein complex);GO:0005930(axoneme);GO:0007018(microtubule-based movement);GO:0031514(motile cilium);GO:0045503(dynein light chain binding);GO:0045504(dynein heavy chain binding);GO:0070286(axonemal dynein complex assembly)	NA	NA
hsa_circ_0028090	inf	up	5.43045e-07	0.0210349	chr12	108818249	108823361	-	2	circRNA	ENST00000326495	SSH1	chr12:108817159-108818248|chr12:108823361-108852637	slingshot protein phosphatase 1 [Source:HGNC Symbol;Acc:HGNC:30579]	GO:0000902(cell morphogenesis);GO:0003779(actin binding);GO:0004721(phosphoprotein phosphatase activity);GO:0004725(protein tyrosine phosphatase activity);GO:0005515(protein binding);GO:0005737(cytoplasm);GO:0005829(cytosol);GO:0005856(cytoskeleton);GO:0005886(plasma membrane);GO:0006470(protein dephosphorylation);GO:0008138(protein tyrosine/serine/threonine phosphatase activity);GO:0016020(membr…	04360(Axon guidance);04810(Regulation of actin cytoskeleton)	EC:3.1.3.16
circRNA14123	inf	up	5.40887e-07	0.0211162	chr17	50188108	50188776	-	3	circRNA	ENST00000225964	COL1A1	chr17:50187983-50188096|chr17:50188795-50188903	collagen type I alpha 1 chain [Source:HGNC Symbol;Acc:HGNC:2197]	GO:0001501(skeletal system development);GO:0001503(ossification);GO:0001568(blood vessel development);GO:0001649(osteoblast differentiation);GO:0001957(intramembranous ossification);GO:0001958(endochondral ossification);GO:0002020(protease binding);GO:0005201(extracellular matrix structural constituent);GO:0005515(protein binding);GO:0005576(extracellular region);GO:0005581(collagen trimer);GO:00…	04151(PI3K-Akt signaling pathway);04510(Focal adhesion);04512(ECM-receptor interaction);04611(Platelet activation);04926(Relaxin signaling pathway);04933(AGE-RAGE signaling pathway in diabetic complications);04974(Protein digestion and absorption);05146(Amoebiasis);05165(Human papillomavirus infection)	NA
hsa_circ_0008887	-3.0787	down	5.41282e-07	0.0212968	chr11	33286413	33328633	+	2	circRNA	ENST00000525975	HIPK3	chr11:33256752-33286412|chr11:33328633-33337074	homeodomain interacting protein kinase 3 [Source:HGNC Symbol;Acc:HGNC:4915]	GO:0000166(nucleotide binding);GO:0004672(protein kinase activity);GO:0004674(protein serine/threonine kinase activity);GO:0004713(protein tyrosine kinase activity);GO:0005524(ATP binding);GO:0005634(nucleus);GO:0005737(cytoplasm);GO:0005829(cytosol);GO:0006468(protein phosphorylation);GO:0006915(apoptotic process);GO:0009299(mRNA transcription);GO:0016301(kinase activity);GO:0016310(phosphorylat…	04218(Cellular senescence)	EC:2.7.11.1
hsa_circ_0131958	-4.20601	down	5.40894e-07	0.0214464	chr6	56492934	56504098	-	7	circRNA	ENST00000244364	DST	chr6:56492433-56492933|chr6:56504098-56506442	dystonin [Source:HGNC Symbol;Acc:HGNC:1090]	GO:0003779(actin binding);GO:0005178(integrin binding);GO:0005198(structural molecule activity);GO:0005509(calcium ion binding);GO:0005515(protein binding);GO:0005604(basement membrane);GO:0005634(nucleus);GO:0005635(nuclear envelope);GO:0005654(nucleoplasm);GO:0005737(cytoplasm);GO:0005783(endoplasmic reticulum);GO:0005789(endoplasmic reticulum membrane);GO:0005829(cytosol);GO:0005856(cytoskelet…	NA	NA
circRNA1882	inf	up	5.40737e-07	0.0216051	chr18	79410403	79433738	+	2	circRNA	ENST00000253506	NFATC1	chr18:79396351-79410402|chr18:79433738-79448781	nuclear factor of activated T cells 1 [Source:HGNC Symbol;Acc:HGNC:7775]	GO:0000790(nuclear chromatin);GO:0000977(RNA polymerase II regulatory region sequence-specific DNA binding);GO:0000978(RNA polymerase II cis-regulatory region sequence-specific DNA binding);GO:0000981(DNA-binding transcription factor activity, RNA polymerase II-specific);GO:0001085(RNA polymerase II transcription factor binding);GO:0001225(RNA polymerase II transcription coactivator binding);GO:0…	04010(MAPK signaling pathway);04022(cGMP-PKG signaling pathway);04024(cAMP signaling pathway);04218(Cellular senescence);04310(Wnt signaling pathway);04380(Osteoclast differentiation);04625(C-type lectin receptor signaling pathway);04650(Natural killer cell mediated cytotoxicity);04658(Th1 and Th2 cell differentiation);04659(Th17 cell differentiation);04660(T cell receptor signaling pathway);0466…	NA
circRNA26377	-inf	down	5.3757e-07	0.0216426	chr19	57861377	57863260	+	1	circRNA	ENST00000419854	ZNF587	chr19:57856233-57858576	zinc finger protein 587 [Source:HGNC Symbol;Acc:HGNC:30955]	GO:0003676(nucleic acid binding);GO:0003677(DNA binding);GO:0005515(protein binding);GO:0005634(nucleus);GO:0006355(regulation of transcription, DNA-templated);GO:0046872(metal ion binding)	05168(Herpes simplex virus 1 infection)	NA
circRNA5387	inf	up	5.34007e-07	0.021662	chr2	189002308	189003048	+	1	intergenic	intergenic_circRNA	intergenic_circRNA	chr2:189002307-189003048	NA	NA	NA	NA
circRNA12487	inf	up	5.32636e-07	0.0217688	chr12	47975442	47976868	-	4	circRNA	ENST00000546974	COL2A1	chr12:47976919-47977102	collagen type II alpha 1 chain [Source:HGNC Symbol;Acc:HGNC:2200]	GO:0001501(skeletal system development);GO:0001502(cartilage condensation);GO:0001503(ossification);GO:0001894(tissue homeostasis);GO:0001958(endochondral ossification);GO:0002062(chondrocyte differentiation);GO:0003007(heart morphogenesis);GO:0005201(extracellular matrix structural constituent);GO:0005515(protein binding);GO:0005576(extracellular region);GO:0005581(collagen trimer);GO:0005585(co…	04151(PI3K-Akt signaling pathway);04510(Focal adhesion);04512(ECM-receptor interaction);04974(Protein digestion and absorption);05165(Human papillomavirus infection)	NA
hsa_circ_0006006	-3.01537	down	5.31357e-07	0.0218786	chr2	172570726	172596023	+	4	circRNA	ENST00000410055	PDK1	chr2:172568817-172570725|chr2:172596023-172597612	pyruvate dehydrogenase kinase 1 [Source:HGNC Symbol;Acc:HGNC:8809]	GO:0000166(nucleotide binding);GO:0004672(protein kinase activity);GO:0004674(protein serine/threonine kinase activity);GO:0004740(pyruvate dehydrogenase (acetyl-transferring) kinase activity);GO:0005515(protein binding);GO:0005524(ATP binding);GO:0005654(nucleoplasm);GO:0005730(nucleolus);GO:0005739(mitochondrion);GO:0005759(mitochondrial matrix);GO:0005967(mitochondrial pyruvate dehydrogenase c…	04066(HIF-1 signaling pathway);04360(Axon guidance);05230(Central carbon metabolism in cancer)	NA
hsa_circ_0005116	inf	up	5.27924e-07	0.0218983	chr2	230442937	230449150	+	4	circRNA	ENST00000264052	SP100	chr2:230417665-230442936|chr2:230449150-230449560	SP100 nuclear antigen [Source:HGNC Symbol;Acc:HGNC:11206]	GO:0000122(negative regulation of transcription by RNA polymerase II);GO:0000723(telomere maintenance);GO:0000784(nuclear chromosome, telomeric region);GO:0000981(DNA-binding transcription factor activity, RNA polymerase II-specific);GO:0003677(DNA binding);GO:0005515(protein binding);GO:0005634(nucleus);GO:0005654(nucleoplasm);GO:0005737(cytoplasm);GO:0006978(DNA damage response, signal transduc…	05168(Herpes simplex virus 1 infection);05203(Viral carcinogenesis)	NA
hsa_circ_0043837	-2.29461	down	5.26174e-07	0.0219862	chr17	42498924	42501304	+	3	circRNA	ENST00000393829	ATP6V0A1	chr17:42495716-42498923|chr17:42501304-42507519	ATPase H+ transporting V0 subunit a1 [Source:HGNC Symbol;Acc:HGNC:865]	GO:0000220(vacuolar proton-transporting V-type ATPase, V0 domain);GO:0005515(protein binding);GO:0005737(cytoplasm);GO:0005765(lysosomal membrane);GO:0005794(Golgi apparatus);GO:0005829(cytosol);GO:0005886(plasma membrane);GO:0006811(ion transport);GO:0007035(vacuolar acidification);GO:0008286(insulin receptor signaling pathway);GO:0010008(endosome membrane);GO:0015078(proton transmembrane transp…	00190(Oxidative phosphorylation);04142(Lysosome);04145(Phagosome);04721(Synaptic vesicle cycle);04966(Collecting duct acid secretion);05110(Vibrio cholerae infection);05120(Epithelial cell signaling in Helicobacter pylori infection);05152(Tuberculosis);05165(Human papillomavirus infection);05323(Rheumatoid arthritis)	NA
hsa_circ_0137263	-inf	down	5.22799e-07	0.0220046	chr8	89647740	89725641	-	1	ciRNA	ENST00000661105	AF117829	chr8:89647739-89725641	novel transcript	NA	NA	NA
hsa_circ_0099356	-3.10468	down	5.21945e-07	0.0221278	chr12	82386803	82403130	+	4	circRNA	ENST00000547357	METTL25	chr12:82358824-82386802|chr12:82403130-82430892	methyltransferase like 25 [Source:HGNC Symbol;Acc:HGNC:26228]	GO:0008168(methyltransferase activity);GO:0016740(transferase activity);GO:0032259(methylation)	NA	NA
hsa_circ_0006364	-2.79719	down	5.25154e-07	0.0224241	X	47846105	47895940	+	3	circRNA	ENST00000338637	ZNF81	X:47836987-47846104|X:47895940-47914923	zinc finger protein 81 [Source:HGNC Symbol;Acc:HGNC:13156]	GO:0003676(nucleic acid binding);GO:0003677(DNA binding);GO:0005634(nucleus);GO:0006355(regulation of transcription, DNA-templated);GO:0046872(metal ion binding)	05168(Herpes simplex virus 1 infection)	NA
circRNA22922	-inf	down	5.26685e-07	0.0226501	chr2	172558708	172566933	+	6	circRNA	ENST00000392571	PDK1	chr2:172556346-172558707|chr2:172566933-172568740	pyruvate dehydrogenase kinase 1 [Source:HGNC Symbol;Acc:HGNC:8809]	GO:0000166(nucleotide binding);GO:0004672(protein kinase activity);GO:0004674(protein serine/threonine kinase activity);GO:0004740(pyruvate dehydrogenase (acetyl-transferring) kinase activity);GO:0005515(protein binding);GO:0005524(ATP binding);GO:0005654(nucleoplasm);GO:0005730(nucleolus);GO:0005739(mitochondrion);GO:0005759(mitochondrial matrix);GO:0005967(mitochondrial pyruvate dehydrogenase c…	04066(HIF-1 signaling pathway);04360(Axon guidance);05230(Central carbon metabolism in cancer)	NA
hsa_circ_0087243	inf	up	5.2897e-07	0.0229097	chr9	77214329	77227485	+	7	circRNA	ENST00000376636	VPS13A	chr9:77213314-77214328|chr9:77227485-77228121	vacuolar protein sorting 13 homolog A [Source:HGNC Symbol;Acc:HGNC:1908]	GO:0005515(protein binding);GO:0005739(mitochondrion);GO:0005741(mitochondrial outer membrane);GO:0005764(lysosome);GO:0005765(lysosomal membrane);GO:0005768(endosome);GO:0005783(endoplasmic reticulum);GO:0005789(endoplasmic reticulum membrane);GO:0005794(Golgi apparatus);GO:0005811(lipid droplet);GO:0005829(cytosol);GO:0006623(protein targeting to vacuole);GO:0006895(Golgi to endosome transport)…	NA	NA
hsa_circ_0114428	-inf	down	5.25892e-07	0.0229368	chr1	90937485	90982370	-	3	circRNA	ENST00000370440	ZNF644	chr1:90918154-90937484|chr1:90982370-91021272	zinc finger protein 644 [Source:HGNC Symbol;Acc:HGNC:29222]	GO:0001226(RNA polymerase II transcription corepressor binding);GO:0003676(nucleic acid binding);GO:0003677(DNA binding);GO:0003700(DNA-binding transcription factor activity);GO:0005634(nucleus);GO:0006355(regulation of transcription, DNA-templated);GO:0046872(metal ion binding)	NA	NA
hsa_circ_0078373	1.87188	up	5.27344e-07	0.023161	chr6	154787861	154792976	+	2	circRNA	ENST00000367186	SCAF8	chr6:154778045-154787860|chr6:154792976-154795008	SR-related CTD associated factor 8 [Source:HGNC Symbol;Acc:HGNC:20959]	GO:0000993(RNA polymerase II complex binding);GO:0003676(nucleic acid binding);GO:0003723(RNA binding);GO:0003729(mRNA binding);GO:0005515(protein binding);GO:0005634(nucleus);GO:0005654(nucleoplasm);GO:0005737(cytoplasm);GO:0005849(mRNA cleavage factor complex);GO:0006369(termination of RNA polymerase II transcription);GO:0006378(mRNA polyadenylation);GO:0016363(nuclear matrix);GO:0032786(positi…	NA	NA
circRNA5522	inf	up	5.28338e-07	0.0233657	chr3	52700263	52700496	-	2	circRNA	ENST00000487642	GLT8D1	chr3:52697934-52700262|chr3:52700496-52704724	glycosyltransferase 8 domain containing 1 [Source:HGNC Symbol;Acc:HGNC:24870]	GO:0005794(Golgi apparatus);GO:0016020(membrane);GO:0016021(integral component of membrane);GO:0016740(transferase activity);GO:0016757(transferase activity, transferring glycosyl groups)	NA	NA
hsa_circ_0135154	-2.59672	down	5.27968e-07	0.0235104	chr7	95977512	95996073	+	4	circRNA	ENST00000537881	DYNC1I1	chr7:95869998-95977511|chr7:95996073-96028174	dynein cytoplasmic 1 intermediate chain 1 [Source:HGNC Symbol;Acc:HGNC:2963]	GO:0000775(chromosome, centromeric region);GO:0000776(kinetochore);GO:0000777(condensed chromosome kinetochore);GO:0000922(spindle pole);GO:0003774(motor activity);GO:0003777(microtubule motor activity);GO:0005515(protein binding);GO:0005634(nucleus);GO:0005694(chromosome);GO:0005737(cytoplasm);GO:0005829(cytosol);GO:0005856(cytoskeleton);GO:0005868(cytoplasmic dynein complex);GO:0005874(microtub…	04145(Phagosome);04962(Vasopressin-regulated water reabsorption);05132(Salmonella infection)	NA
circRNA16767	inf	up	5.35316e-07	0.0240009	chr12	47984558	47985747	+	4	circRNA	ENST00000337299	COL2A1	chr12:47984140-47984546|chr12:47985826-47985912	collagen type II alpha 1 chain [Source:HGNC Symbol;Acc:HGNC:2200]	GO:0001501(skeletal system development);GO:0001502(cartilage condensation);GO:0001503(ossification);GO:0001894(tissue homeostasis);GO:0001958(endochondral ossification);GO:0002062(chondrocyte differentiation);GO:0003007(heart morphogenesis);GO:0005201(extracellular matrix structural constituent);GO:0005515(protein binding);GO:0005576(extracellular region);GO:0005581(collagen trimer);GO:0005585(co…	04151(PI3K-Akt signaling pathway);04510(Focal adhesion);04512(ECM-receptor interaction);04974(Protein digestion and absorption);05165(Human papillomavirus infection)	NA
circRNA24008	-inf	down	5.36358e-07	0.0242112	chr7	95828058	95996073	+	6	circRNA	ENST00000457059	DYNC1I1	chr7:95813337-95828057|chr7:95996073-96028175	dynein cytoplasmic 1 intermediate chain 1 [Source:HGNC Symbol;Acc:HGNC:2963]	GO:0000775(chromosome, centromeric region);GO:0000776(kinetochore);GO:0000777(condensed chromosome kinetochore);GO:0000922(spindle pole);GO:0003774(motor activity);GO:0003777(microtubule motor activity);GO:0005515(protein binding);GO:0005634(nucleus);GO:0005694(chromosome);GO:0005737(cytoplasm);GO:0005829(cytosol);GO:0005856(cytoskeleton);GO:0005868(cytoplasmic dynein complex);GO:0005874(microtub…	04145(Phagosome);04962(Vasopressin-regulated water reabsorption);05132(Salmonella infection)	NA
hsa_circ_0003039	inf	up	5.37445e-07	0.0244242	chr1	161778244	161784096	+	3	circRNA	ENST00000367942	ATF6	chr1:161766442-161778243|chr1:161784096-161791407	activating transcription factor 6 [Source:HGNC Symbol;Acc:HGNC:791]	GO:0000139(Golgi membrane);GO:0000790(nuclear chromatin);GO:0000976(transcription regulatory region sequence-specific DNA binding);GO:0000977(RNA polymerase II regulatory region sequence-specific DNA binding);GO:0000978(RNA polymerase II cis-regulatory region sequence-specific DNA binding);GO:0000981(DNA-binding transcription factor activity, RNA polymerase II-specific);GO:0001228(DNA-binding tra…	04141(Protein processing in endoplasmic reticulum);05010(Alzheimer disease)	NA
circRNA9400	inf	up	5.35379e-07	0.0244936	chr9	76500917	76503756	+	2	circRNA	ENST00000444201	GCNT1	chr9:76459305-76500916	glucosaminyl (N-acetyl) transferase 1 [Source:HGNC Symbol;Acc:HGNC:4203]	GO:0000139(Golgi membrane);GO:0003829(beta-1,3-galactosyl-O-glycosyl-glycoprotein beta-1,6-N-acetylglucosaminyltransferase activity);GO:0005515(protein binding);GO:0005615(extracellular space);GO:0005794(Golgi apparatus);GO:0005802(trans-Golgi network);GO:0006486(protein glycosylation);GO:0009101(glycoprotein biosynthetic process);GO:0016020(membrane);GO:0016021(integral component of membrane);GO…	00512(Mucin type O-glycan biosynthesis)	NA
hsa_circ_0132609	3.57582	up	5.33186e-07	0.0245559	chr6	88844357	88891915	-	5	circRNA	ENST00000369485	RNGTT	chr6:88801632-88844356|chr6:88891915-88904714	RNA guanylyltransferase and 5'-phosphatase [Source:HGNC Symbol;Acc:HGNC:10073]	GO:0000166(nucleotide binding);GO:0003824(catalytic activity);GO:0004484(mRNA guanylyltransferase activity);GO:0004651(polynucleotide 5'-phosphatase activity);GO:0004721(phosphoprotein phosphatase activity);GO:0004725(protein tyrosine phosphatase activity);GO:0005515(protein binding);GO:0005525(GTP binding);GO:0005634(nucleus);GO:0005654(nucleoplasm);GO:0006366(transcription by RNA polymerase II)…	03015(mRNA surveillance pathway)	EC:2.7.7.50
circRNA16794	inf	up	5.30979e-07	0.0246162	chr8	140700892	140752316	-	10	circRNA	ENST00000521986	PTK2	chr8:140686694-140700891|chr8:140752316-140761165	protein tyrosine kinase 2 [Source:HGNC Symbol;Acc:HGNC:9611]	GO:0000165(MAPK cascade);GO:0000166(nucleotide binding);GO:0000226(microtubule cytoskeleton organization);GO:0001525(angiogenesis);GO:0001568(blood vessel development);GO:0001570(vasculogenesis);GO:0001725(stress fiber);GO:0001764(neuron migration);GO:0001890(placenta development);GO:0001932(regulation of protein phosphorylation);GO:0001934(positive regulation of protein phosphorylation);GO:00030…	01522(Endocrine resistance);04012(ErbB signaling pathway);04062(Chemokine signaling pathway);04151(PI3K-Akt signaling pathway);04360(Axon guidance);04370(VEGF signaling pathway);04510(Focal adhesion);04670(Leukocyte transendothelial migration);04810(Regulation of actin cytoskeleton);05100(Bacterial invasion of epithelial cells);05146(Amoebiasis);05163(Human cytomegalovirus infection);05165(Human …	NA
circRNA5822	inf	up	5.28021e-07	0.0246401	chr8	33388964	33389798	-	1	circRNA	ENST00000518076	FUT10	chr8:33389798-33394218	fucosyltransferase 10 [Source:HGNC Symbol;Acc:HGNC:19234]	GO:0000139(Golgi membrane);GO:0005654(nucleoplasm);GO:0005783(endoplasmic reticulum);GO:0005794(Golgi apparatus);GO:0006457(protein folding);GO:0006486(protein glycosylation);GO:0006605(protein targeting);GO:0007399(nervous system development);GO:0008417(fucosyltransferase activity);GO:0009566(fertilization);GO:0016020(membrane);GO:0016021(integral component of membrane);GO:0016740(transferase ac…	NA	NA
circRNA12329	inf	up	5.27479e-07	0.0247757	chr17	64434318	64436276	+	1	intergenic	intergenic_circRNA	intergenic_circRNA	chr17:64434317-64436276	NA	NA	NA	NA
hsa_circ_0106507	-inf	down	5.27314e-07	0.0249288	chr17	29666867	29684684	-	6	circRNA	ENST00000269033	SSH2	chr17:29655607-29666866|chr17:29684684-29695458	slingshot protein phosphatase 2 [Source:HGNC Symbol;Acc:HGNC:30580]	GO:0003779(actin binding);GO:0004721(phosphoprotein phosphatase activity);GO:0004725(protein tyrosine phosphatase activity);GO:0005615(extracellular space);GO:0005737(cytoplasm);GO:0005856(cytoskeleton);GO:0006470(protein dephosphorylation);GO:0008138(protein tyrosine/serine/threonine phosphatase activity);GO:0016311(dephosphorylation);GO:0016787(hydrolase activity);GO:0016791(phosphatase activit…	04360(Axon guidance);04810(Regulation of actin cytoskeleton)	EC:3.1.3.16
hsa_circ_0002837	2.83894	up	5.33821e-07	0.0253992	chr19	41341883	41342247	-	2	circRNA	ENST00000221930	TGFB1	chr19:41332281-41341882|chr19:41342247-41344746	transforming growth factor beta 1 [Source:HGNC Symbol;Acc:HGNC:11766]	GO:0000122(negative regulation of transcription by RNA polymerase II);GO:0001570(vasculogenesis);GO:0001657(ureteric bud development);GO:0001666(response to hypoxia);GO:0001763(morphogenesis of a branching structure);GO:0001775(cell activation);GO:0001837(epithelial to mesenchymal transition);GO:0001843(neural tube closure);GO:0002028(regulation of sodium ion transport);GO:0002460(adaptive immune…	04010(MAPK signaling pathway);04060(Cytokine-cytokine receptor interaction);04068(FoxO signaling pathway);04110(Cell cycle);04218(Cellular senescence);04350(TGF-beta signaling pathway);04380(Osteoclast differentiation);04390(Hippo signaling pathway);04659(Th17 cell differentiation);04672(Intestinal immune network for IgA production);04926(Relaxin signaling pathway);04932(Non-alcoholic fatty liver…	NA
hsa_circ_0004342	inf	up	5.3284e-07	0.025515	chr6	167870386	167889326	+	5	circRNA	ENST00000344191	AFDN	chr6:167864746-167870385|chr6:167889326-167890861	afadin, adherens junction formation factor [Source:HGNC Symbol;Acc:HGNC:7137]	GO:0005515(protein binding);GO:0005654(nucleoplasm);GO:0005737(cytoplasm);GO:0005829(cytosol);GO:0005886(plasma membrane);GO:0005911(cell-cell junction);GO:0005912(adherens junction);GO:0007155(cell adhesion);GO:0007165(signal transduction);GO:0007267(cell-cell signaling);GO:0008022(protein C-terminus binding);GO:0010628(positive regulation of gene expression);GO:0016607(nuclear speck);GO:0017016…	04014(Ras signaling pathway);04015(Rap1 signaling pathway);04024(cAMP signaling pathway);04520(Adherens junction);04530(Tight junction);04670(Leukocyte transendothelial migration)	NA
circRNA23668	-inf	down	5.32233e-07	0.0256483	chr3	114693528	114717527	-	1	intergenic	intergenic_circRNA	intergenic_circRNA	chr3:114693527-114717527	NA	NA	NA	NA
hsa_circ_0133802	inf	up	5.30937e-07	0.0257478	chr7	157207398	157225539	+	6	circRNA	ENST00000348165	UBE3C	chr7:157201807-157207397|chr7:157225539-157231079	ubiquitin protein ligase E3C [Source:HGNC Symbol;Acc:HGNC:16803]	GO:0000209(protein polyubiquitination);GO:0000502(proteasome complex);GO:0004842(ubiquitin-protein transferase activity);GO:0005515(protein binding);GO:0005634(nucleus);GO:0006511(ubiquitin-dependent protein catabolic process);GO:0016567(protein ubiquitination);GO:0016740(transferase activity);GO:0061630(ubiquitin protein ligase activity);GO:0061631(ubiquitin conjugating enzyme activity)	04120(Ubiquitin mediated proteolysis)	EC:2.3.2.26
hsa_circ_0136657	-2.96415	down	5.29542e-07	0.0258416	chr8	47396376	47440542	+	3	circRNA	ENST00000541342	SPIDR	chr8:47294030-47396375|chr8:47440542-47595810	scaffold protein involved in DNA repair [Source:HGNC Symbol;Acc:HGNC:28971]	GO:0000228(nuclear chromosome);GO:0000724(double-strand break repair via homologous recombination);GO:0005515(protein binding);GO:0005634(nucleus);GO:0005654(nucleoplasm);GO:0006281(DNA repair);GO:0006310(DNA recombination);GO:0006974(cellular response to DNA damage stimulus);GO:0010569(regulation of double-strand break repair via homologous recombination);GO:0031334(positive regulation of protei…	NA	NA
circRNA29536	-inf	down	5.27863e-07	0.0259207	chr20	19990007	19996842	+	3	circRNA	ENST00000484638	RIN2	chr20:19975787-19990006|chr20:19996842-20000613	Ras and Rab interactor 2 [Source:HGNC Symbol;Acc:HGNC:18750]	GO:0005096(GTPase activator activity);GO:0005575(cellular_component);GO:0005737(cytoplasm);GO:0005829(cytosol);GO:0006897(endocytosis);GO:0007165(signal transduction);GO:0007264(small GTPase mediated signal transduction);GO:0010595(positive regulation of endothelial cell migration);GO:0017112(Rab guanyl-nucleotide exchange factor activity);GO:0030695(GTPase regulator activity);GO:0043547(positive…	NA	NA
hsa_circ_0132833	inf	up	5.26603e-07	0.0260195	chr7	102963533	103029418	-	6	circRNA	ENST00000379305	FBXL13	chr7:102931933-102963532|chr7:103029418-103055643	F-box and leucine rich repeat protein 13 [Source:HGNC Symbol;Acc:HGNC:21658]	GO:0000209(protein polyubiquitination);GO:0005515(protein binding);GO:0005737(cytoplasm);GO:0005829(cytosol);GO:0005856(cytoskeleton);GO:0005929(cilium);GO:0006511(ubiquitin-dependent protein catabolic process);GO:0019005(SCF ubiquitin ligase complex);GO:0031146(SCF-dependent proteasomal ubiquitin-dependent protein catabolic process);GO:0031514(motile cilium);GO:0042995(cell projection);GO:004368…	NA	NA
hsa_circ_0005592	-inf	down	5.24508e-07	0.0260759	chr7	66808886	66810847	+	1	intergenic	intergenic_circRNA	intergenic_circRNA	chr7:66808885-66810847	NA	NA	NA	NA
hsa_circ_0130191	inf	up	5.51129e-07	0.0275675	chr6	107503657	107587175	+	4	circRNA	ENST00000317357	SOBP	chr6:107490712-107503656|chr6:107587175-107633513	sine oculis binding protein homolog [Source:HGNC Symbol;Acc:HGNC:29256]	GO:0005634(nucleus);GO:0007605(sensory perception of sound);GO:0007626(locomotory behavior);GO:0032184(SUMO polymer binding);GO:0042472(inner ear morphogenesis);GO:0046872(metal ion binding);GO:0050890(cognition);GO:0090102(cochlea development)	NA	NA
hsa_circ_0095144	-inf	down	5.49924e-07	0.0276749	chr11	11880177	11897693	+	4	circRNA	ENST00000527733	USP47	chr11:11842224-11880176|chr11:11897693-11902714	ubiquitin specific peptidase 47 [Source:HGNC Symbol;Acc:HGNC:20076]	GO:0004197(cysteine-type endopeptidase activity);GO:0004843(thiol-dependent ubiquitin-specific protease activity);GO:0005515(protein binding);GO:0005634(nucleus);GO:0005654(nucleoplasm);GO:0005737(cytoplasm);GO:0005829(cytosol);GO:0006281(DNA repair);GO:0006284(base-excision repair);GO:0006508(proteolysis);GO:0006511(ubiquitin-dependent protein catabolic process);GO:0006974(cellular response to D…	NA	EC:3.4.19.12
hsa_circ_0045350	-inf	down	5.48643e-07	0.0277778	chr17	65549520	65558736	-	2	circRNA	ENST00000307078	AXIN2	chr17:65541557-65549519|chr17:65558736-65561449	axin 2 [Source:HGNC Symbol;Acc:HGNC:904]	GO:0001756(somitogenesis);GO:0001934(positive regulation of protein phosphorylation);GO:0001957(intramembranous ossification);GO:0003139(secondary heart field specification);GO:0003413(chondrocyte differentiation involved in endochondral bone morphogenesis);GO:0005515(protein binding);GO:0005634(nucleus);GO:0005737(cytoplasm);GO:0005813(centrosome);GO:0005829(cytosol);GO:0007275(multicellular org…	04310(Wnt signaling pathway);04390(Hippo signaling pathway);04550(Signaling pathways regulating pluripotency of stem cells);04934(Cushing syndrome);05165(Human papillomavirus infection);05200(Pathways in cancer);05210(Colorectal cancer);05213(Endometrial cancer);05217(Basal cell carcinoma);05224(Breast cancer);05225(Hepatocellular carcinoma);05226(Gastric cancer)	NA
ciRNA2788	-inf	down	5.46244e-07	0.027823	chr2	68490190	68515736	+	1	ciRNA	ENST00000529851	APLF	chr2:68490189-68515736	aprataxin and PNKP like factor [Source:HGNC Symbol;Acc:HGNC:28724]	GO:0000012(single strand break repair);GO:0000166(nucleotide binding);GO:0003906(DNA-(apurinic or apyrimidinic site) endonuclease activity);GO:0004520(endodeoxyribonuclease activity);GO:0004930(G protein-coupled receptor activity);GO:0004983(neuropeptide Y receptor activity);GO:0005515(protein binding);GO:0005634(nucleus);GO:0005654(nucleoplasm);GO:0005694(chromosome);GO:0005737(cytoplasm);GO:000…	NA	EC:4.2.99.18
hsa_circ_0008240	inf	up	5.47212e-07	0.0280392	chr9	126340508	126395697	+	5	circRNA	ENST00000361171	MVB12B	chr9:126327010-126340507|chr9:126395697-126421853	multivesicular body subunit 12B [Source:HGNC Symbol;Acc:HGNC:23368]	GO:0000813(ESCRT I complex);GO:0005515(protein binding);GO:0005634(nucleus);GO:0005768(endosome);GO:0005769(early endosome);GO:0005770(late endosome);GO:0005829(cytosol);GO:0005886(plasma membrane);GO:0008289(lipid binding);GO:0010008(endosome membrane);GO:0015031(protein transport);GO:0016020(membrane);GO:0016197(endosomal transport);GO:0019058(viral life cycle);GO:0019075(virus maturation);GO:0…	04144(Endocytosis)	NA
circRNA9693	inf	up	5.44608e-07	0.0280718	chr6	131948655	131948908	-	1	circRNA	ENST00000367976	CCN2	chr6:131949560-131949949	cellular communication network factor 2 [Source:HGNC Symbol;Acc:HGNC:2500]	GO:0001502(cartilage condensation);GO:0001503(ossification);GO:0001525(angiogenesis);GO:0001894(tissue homeostasis);GO:0001934(positive regulation of protein phosphorylation);GO:0001968(fibronectin binding);GO:0005178(integrin binding);GO:0005515(protein binding);GO:0005520(insulin-like growth factor binding);GO:0005576(extracellular region);GO:0005615(extracellular space);GO:0005801(cis-Golgi ne…	04371(Apelin signaling pathway);04390(Hippo signaling pathway)	NA
circRNA16515	-4.75278	down	5.51759e-07	0.0286087	chr10	15833631	15843272	-	6	circRNA	ENST00000277632	MINDY3	chr10:15821726-15833630|chr10:15843272-15847864	MINDY lysine 48 deubiquitinase 3 [Source:HGNC Symbol;Acc:HGNC:23578]	GO:0004843(thiol-dependent ubiquitin-specific protease activity);GO:0005515(protein binding);GO:0005634(nucleus);GO:0005654(nucleoplasm);GO:0006508(proteolysis);GO:0006915(apoptotic process);GO:0008233(peptidase activity);GO:0008234(cysteine-type peptidase activity);GO:0016787(hydrolase activity);GO:0016807(cysteine-type carboxypeptidase activity);GO:0031965(nuclear membrane);GO:0036459(thiol-dep…	NA	EC:3.4.19.12
circRNA5988	inf	up	5.53767e-07	0.0288817	chr1	75745807	75750546	+	3	circRNA	ENST00000529059	ACADM	chr1:75740110-75745806|chr1:75750546-75761122	acyl-CoA dehydrogenase medium chain [Source:HGNC Symbol;Acc:HGNC:89]	GO:0001889(liver development);GO:0003995(acyl-CoA dehydrogenase activity);GO:0005634(nucleus);GO:0005739(mitochondrion);GO:0005759(mitochondrial matrix);GO:0005978(glycogen biosynthetic process);GO:0006082(organic acid metabolic process);GO:0006111(regulation of gluconeogenesis);GO:0006629(lipid metabolic process);GO:0006631(fatty acid metabolic process);GO:0006635(fatty acid beta-oxidation);GO:0…	00071(Fatty acid degradation);00280(Valine, leucine and isoleucine degradation);00410(beta-Alanine metabolism);00640(Propanoate metabolism);03320(PPAR signaling pathway)	NA
circRNA12121	inf	up	5.54364e-07	0.029082	chr6	75702646	75703072	+	1	circRNA	ENST00000447266	SENP6	chr6:75697517-75702645|chr6:75703072-75709527	SUMO specific peptidase 6 [Source:HGNC Symbol;Acc:HGNC:20944]	GO:0005515(protein binding);GO:0005634(nucleus);GO:0005654(nucleoplasm);GO:0005737(cytoplasm);GO:0005829(cytosol);GO:0006508(proteolysis);GO:0008233(peptidase activity);GO:0008234(cysteine-type peptidase activity);GO:0016787(hydrolase activity);GO:0016925(protein sumoylation);GO:0016926(protein desumoylation);GO:0070139(SUMO-specific endopeptidase activity);GO:0070646(protein modification by smal…	NA	EC:3.4.22.68
hsa_circ_0018168	inf	up	5.52541e-07	0.0291549	chr10	34269657	34284245	-	2	circRNA	ENST00000545260	PARD3	chr10:34131583-34269656|chr10:34284245-34317106	par-3 family cell polarity regulator [Source:HGNC Symbol;Acc:HGNC:16051]	GO:0000226(microtubule cytoskeleton organization);GO:0005515(protein binding);GO:0005546(phosphatidylinositol-4,5-bisphosphate binding);GO:0005547(phosphatidylinositol-3,4,5-trisphosphate binding);GO:0005737(cytoplasm);GO:0005829(cytosol);GO:0005856(cytoskeleton);GO:0005886(plasma membrane);GO:0005911(cell-cell junction);GO:0005912(adherens junction);GO:0005923(bicellular tight junction);GO:00059…	04015(Rap1 signaling pathway);04062(Chemokine signaling pathway);04080(Neuroactive ligand-receptor interaction);04144(Endocytosis);04360(Axon guidance);04390(Hippo signaling pathway);04520(Adherens junction);04530(Tight junction);05165(Human papillomavirus infection)	NA
hsa_circ_0001005	2.49965	up	5.52497e-07	0.029321	chr2	53693884	53750941	-	7	circRNA	ENST00000406053	ASB3	chr2:53604915-53693883|chr2:53750941-53765376	ankyrin repeat and SOCS box containing 3 [Source:HGNC Symbol;Acc:HGNC:16013]	GO:0005515(protein binding);GO:0005829(cytosol);GO:0016567(protein ubiquitination);GO:0030315(T-tubule);GO:0035556(intracellular signal transduction);GO:0036371(protein localization to T-tubule);GO:0043687(post-translational protein modification);GO:0055117(regulation of cardiac muscle contraction)	NA	NA
hsa_circ_0102420	0.914323	up	5.54502e-07	0.0295966	chr14	64521487	64523402	+	1	circRNA	ENST00000358738	ZBTB1	chr14:64504946-64521486|chr14:64523402-64531860	zinc finger and BTB domain containing 1 [Source:HGNC Symbol;Acc:HGNC:20259]	GO:0000122(negative regulation of transcription by RNA polymerase II);GO:0000978(RNA polymerase II cis-regulatory region sequence-specific DNA binding);GO:0002376(immune system process);GO:0002711(positive regulation of T cell mediated immunity);GO:0003676(nucleic acid binding);GO:0003677(DNA binding);GO:0005515(protein binding);GO:0005634(nucleus);GO:0005654(nucleoplasm);GO:0006281(DNA repair);G…	NA	NA
hsa_circ_0128780	1.94668	up	5.63298e-07	0.0302378	chr5	21491321	21497196	+	3	circRNA	ENST00000508260	GUSBP1	chr5:21461866-21491320|chr5:21497196-21501691	GUSB pseudogene 1 [Source:HGNC Symbol;Acc:HGNC:13670]	NA	NA	NA
circRNA5607	2.12689	up	5.61507e-07	0.030313	chr3	142054116	142101841	-	3	circRNA	ENST00000467072	TFDP2	chr3:142005544-142054115|chr3:142101841-142149183	transcription factor Dp-2 [Source:HGNC Symbol;Acc:HGNC:11751]	GO:0000083(regulation of transcription involved in G1/S transition of mitotic cell cycle);GO:0000278(mitotic cell cycle);GO:0000790(nuclear chromatin);GO:0000977(RNA polymerase II regulatory region sequence-specific DNA binding);GO:0000981(DNA-binding transcription factor activity, RNA polymerase II-specific);GO:0001228(DNA-binding transcription activator activity, RNA polymerase II-specific);GO:…	04110(Cell cycle)	NA
circRNA14148	inf	up	5.59021e-07	0.0303492	chr17	50196629	50197217	+	3	circRNA	ENST00000495677	COL1A1	chr17:50196528-50196617|chr17:50197233-50197732	collagen type I alpha 1 chain [Source:HGNC Symbol;Acc:HGNC:2197]	GO:0001501(skeletal system development);GO:0001503(ossification);GO:0001568(blood vessel development);GO:0001649(osteoblast differentiation);GO:0001957(intramembranous ossification);GO:0001958(endochondral ossification);GO:0002020(protease binding);GO:0005201(extracellular matrix structural constituent);GO:0005515(protein binding);GO:0005576(extracellular region);GO:0005581(collagen trimer);GO:00…	04151(PI3K-Akt signaling pathway);04510(Focal adhesion);04512(ECM-receptor interaction);04611(Platelet activation);04926(Relaxin signaling pathway);04933(AGE-RAGE signaling pathway in diabetic complications);04974(Protein digestion and absorption);05146(Amoebiasis);05165(Human papillomavirus infection)	NA
hsa_circ_0047719	-3.15384	down	5.56549e-07	0.0303848	chr18	54271360	54277855	+	3	circRNA	ENST00000579534	POLI	chr18:54269661-54271359|chr18:54277855-54280666	DNA polymerase iota [Source:HGNC Symbol;Acc:HGNC:9182]	GO:0003677(DNA binding);GO:0003684(damaged DNA binding);GO:0003887(DNA-directed DNA polymerase activity);GO:0005515(protein binding);GO:0005622(intracellular);GO:0005634(nucleus);GO:0005654(nucleoplasm);GO:0006260(DNA replication);GO:0006281(DNA repair);GO:0006974(cellular response to DNA damage stimulus);GO:0016607(nuclear speck);GO:0016740(transferase activity);GO:0016779(nucleotidyltransferase…	03460(Fanconi anemia pathway)	EC:2.7.7.7
circRNA2845	2.18593	up	5.57012e-07	0.03058	chr5	65242104	65473952	-	14	circRNA	ENST00000381055	ADAMTS6	chr5:65226219-65242103|chr5:65473952-65481342	ADAM metallopeptidase with thrombospondin type 1 motif 6 [Source:HGNC Symbol;Acc:HGNC:222]	GO:0001822(kidney development);GO:0003279(cardiac septum development);GO:0004222(metalloendopeptidase activity);GO:0005576(extracellular region);GO:0006508(proteolysis);GO:0007507(heart development);GO:0008233(peptidase activity);GO:0008237(metallopeptidase activity);GO:0016787(hydrolase activity);GO:0030198(extracellular matrix organization);GO:0031012(extracellular matrix);GO:0035904(aorta deve…	NA	NA
circRNA23863	-inf	down	5.54539e-07	0.0306133	chr2	68490191	68578003	+	10	circRNA	ENST00000445692	APLF	chr2:68467827-68490190	aprataxin and PNKP like factor [Source:HGNC Symbol;Acc:HGNC:28724]	GO:0000012(single strand break repair);GO:0000166(nucleotide binding);GO:0003906(DNA-(apurinic or apyrimidinic site) endonuclease activity);GO:0004520(endodeoxyribonuclease activity);GO:0004930(G protein-coupled receptor activity);GO:0004983(neuropeptide Y receptor activity);GO:0005515(protein binding);GO:0005634(nucleus);GO:0005654(nucleoplasm);GO:0005694(chromosome);GO:0005737(cytoplasm);GO:000…	NA	EC:4.2.99.18
circRNA26297	-inf	down	5.59034e-07	0.031032	chr16	70226771	70246610	-	16	circRNA	ENST00000565246	SMG1P7	chr16:70222502-70226751	SMG1 pseudogene 7 [Source:HGNC Symbol;Acc:HGNC:49864]	NA	NA	NA
circRNA9393	inf	up	5.59865e-07	0.0312489	chr1	245017243	245083688	+	5	circRNA	ENST00000425550	EFCAB2	chr1:245083688-245086760	EF-hand calcium binding domain 2 [Source:HGNC Symbol;Acc:HGNC:28166]	GO:0005509(calcium ion binding);GO:0005737(cytoplasm);GO:0005856(cytoskeleton);GO:0005929(cilium);GO:0031514(motile cilium);GO:0042995(cell projection);GO:0097228(sperm principal piece)	NA	NA
hsa_circ_0006010	inf	up	5.56911e-07	0.0312538	chr7	32632543	32639365	-	3	circRNA	ENST00000417811	DPY19L1P1	chr7:32623439-32632543|chr7:32639365-32655987	DPY19L1 pseudogene 1 [Source:HGNC Symbol;Acc:HGNC:22395]	NA	NA	NA
hsa_circ_0098362	-inf	down	5.54319e-07	0.0312775	chr12	31398175	31409384	-	4	circRNA	ENST00000389082	DENND5B	chr12:31392696-31398174|chr12:31409384-31413435	DENN domain containing 5B [Source:HGNC Symbol;Acc:HGNC:28338]	GO:0005085(guanyl-nucleotide exchange factor activity);GO:0005515(protein binding);GO:0005829(cytosol);GO:0016020(membrane);GO:0016021(integral component of membrane);GO:0017112(Rab guanyl-nucleotide exchange factor activity);GO:1905885(positive regulation of triglyceride transport)	NA	NA
circRNA23960	-inf	down	5.51865e-07	0.0313073	chr13	102622878	102627924	+	3	circRNA	ENST00000651544	TPP2	chr13:102618846-102622877|chr13:102627924-102629482	tripeptidyl peptidase 2 [Source:HGNC Symbol;Acc:HGNC:12016]	GO:0000209(protein polyubiquitination);GO:0004175(endopeptidase activity);GO:0004177(aminopeptidase activity);GO:0004252(serine-type endopeptidase activity);GO:0005515(protein binding);GO:0005634(nucleus);GO:0005654(nucleoplasm);GO:0005737(cytoplasm);GO:0005829(cytosol);GO:0006508(proteolysis);GO:0008233(peptidase activity);GO:0008236(serine-type peptidase activity);GO:0008240(tripeptidyl-peptida…	NA	EC:3.4.14.10
circRNA28098	-inf	down	5.54777e-07	0.0316417	chr3	43299755	43303792	+	2	circRNA	ENST00000296088	SNRK	chr3:43286675-43299754|chr3:43303792-43332169	SNF related kinase [Source:HGNC Symbol;Acc:HGNC:30598]	GO:0000166(nucleotide binding);GO:0000287(magnesium ion binding);GO:0004672(protein kinase activity);GO:0004674(protein serine/threonine kinase activity);GO:0005524(ATP binding);GO:0005634(nucleus);GO:0005737(cytoplasm);GO:0006468(protein phosphorylation);GO:0016301(kinase activity);GO:0016310(phosphorylation);GO:0016740(transferase activity);GO:0030099(myeloid cell differentiation);GO:0035556(in…	NA	EC:2.7.11.1
hsa_circ_0006952	-2.68355	down	5.54948e-07	0.0318207	chr18	51054781	51067187	+	6	circRNA	ENST00000398417	SMAD4	chr18:51049324-51054780|chr18:51067187-51076637	SMAD family member 4 [Source:HGNC Symbol;Acc:HGNC:6770]	GO:0000122(negative regulation of transcription by RNA polymerase II);GO:0000790(nuclear chromatin);GO:0000976(transcription regulatory region sequence-specific DNA binding);GO:0000977(RNA polymerase II regulatory region sequence-specific DNA binding);GO:0000978(RNA polymerase II cis-regulatory region sequence-specific DNA binding);GO:0000981(DNA-binding transcription factor activity, RNA polymer…	04068(FoxO signaling pathway);04110(Cell cycle);04310(Wnt signaling pathway);04350(TGF-beta signaling pathway);04371(Apelin signaling pathway);04390(Hippo signaling pathway);04520(Adherens junction);04550(Signaling pathways regulating pluripotency of stem cells);04659(Th17 cell differentiation);04933(AGE-RAGE signaling pathway in diabetic complications);05161(Hepatitis B);05166(Human T-cell leuke…	NA
circRNA3422	inf	up	5.52949e-07	0.0318748	chr3	71112536	71493555	-	5	circRNA	ENST00000649528	FOXP1	chr3:71053773-71112535|chr3:71493555-71581548	forkhead box P1 [Source:HGNC Symbol;Acc:HGNC:3823]	GO:0000790(nuclear chromatin);GO:0000981(DNA-binding transcription factor activity, RNA polymerase II-specific);GO:0001046(core promoter sequence-specific DNA binding);GO:0002903(negative regulation of B cell apoptotic process);GO:0003677(DNA binding);GO:0003700(DNA-binding transcription factor activity);GO:0005515(protein binding);GO:0005634(nucleus);GO:0005654(nucleoplasm);GO:0006355(regulation…	05206(MicroRNAs in cancer)	NA
hsa_circ_0015491	-inf	down	5.51348e-07	0.0319506	chr1	180078463	180080661	+	2	circRNA	ENST00000367607	CEP350	chr1:180075221-180078462|chr1:180080661-180084017	centrosomal protein 350 [Source:HGNC Symbol;Acc:HGNC:24238]	GO:0005515(protein binding);GO:0005634(nucleus);GO:0005737(cytoplasm);GO:0005813(centrosome);GO:0005814(centriole);GO:0005815(microtubule organizing center);GO:0005819(spindle);GO:0005856(cytoskeleton);GO:0008017(microtubule binding);GO:0016020(membrane);GO:0034453(microtubule anchoring);GO:0042995(cell projection);GO:0071539(protein localization to centrosome);GO:1905515(non-motile cilium assemb…	NA	NA
hsa_circ_0001777	-inf	down	5.49067e-07	0.0319859	chr7	158788004	158799072	-	5	circRNA	ENST00000251527	ESYT2	chr7:158773396-158788003|chr7:158799072-158829088	extended synaptotagmin 2 [Source:HGNC Symbol;Acc:HGNC:22211]	GO:0005509(calcium ion binding);GO:0005515(protein binding);GO:0005544(calcium-dependent phospholipid binding);GO:0005783(endoplasmic reticulum);GO:0005789(endoplasmic reticulum membrane);GO:0005886(plasma membrane);GO:0005887(integral component of plasma membrane);GO:0006687(glycosphingolipid metabolic process);GO:0006869(lipid transport);GO:0006897(endocytosis);GO:0008289(lipid binding);GO:0008…	NA	NA
circRNA5558	2.76297	up	5.46993e-07	0.0320319	chr1	155921376	155921918	-	2	circRNA	ENST00000478002	KHDC4	chr1:155917672-155921375|chr1:155921918-155923627	KH domain containing 4, pre-mRNA splicing factor [Source:HGNC Symbol;Acc:HGNC:29145]	GO:0003723(RNA binding);GO:0005515(protein binding);GO:0005634(nucleus);GO:0005681(spliceosomal complex);GO:0005737(cytoplasm);GO:0006376(mRNA splice site selection);GO:0006397(mRNA processing);GO:0008380(RNA splicing)	NA	NA
hsa_circ_0007677	-inf	down	5.45712e-07	0.0321233	chr1	12299202	12304728	+	2	circRNA	ENST00000620676	VPS13D	chr1:12293704-12299201|chr1:12304728-12308430	vacuolar protein sorting 13 homolog D [Source:HGNC Symbol;Acc:HGNC:23595]	GO:0005515(protein binding);GO:0006623(protein targeting to vacuole);GO:0007005(mitochondrion organization);GO:0019898(extrinsic component of membrane);GO:0045053(protein retention in Golgi apparatus);GO:0070062(extracellular exosome);GO:1901526(positive regulation of mitophagy)	NA	NA
circRNA12218	inf	up	5.45107e-07	0.032254	chr15	88843356	88845624	+	2	circRNA	ENST00000352105	ACAN	chr15:88841867-88843355|chr15:88845882-88847243	aggrecan [Source:HGNC Symbol;Acc:HGNC:319]	GO:0001501(skeletal system development);GO:0001502(cartilage condensation);GO:0002063(chondrocyte development);GO:0005201(extracellular matrix structural constituent);GO:0005509(calcium ion binding);GO:0005515(protein binding);GO:0005540(hyaluronic acid binding);GO:0005576(extracellular region);GO:0005604(basement membrane);GO:0005796(Golgi lumen);GO:0006508(proteolysis);GO:0007155(cell adhesion)…	NA	NA
hsa_circ_0005648	inf	up	5.43828e-07	0.0323442	chr16	199062	208188	-	3	circRNA	ENST00000426094	LUC7L	chr16:193015-199061|chr16:208188-220648	LUC7 like [Source:HGNC Symbol;Acc:HGNC:6723]	GO:0003729(mRNA binding);GO:0005515(protein binding);GO:0005685(U1 snRNP);GO:0006376(mRNA splice site selection);GO:0042802(identical protein binding);GO:0045843(negative regulation of striated muscle tissue development);GO:0050733(RS domain binding);GO:0071004(U2-type prespliceosome)	NA	NA
circRNA5963	3.15036	up	5.42452e-07	0.0324278	chr6	131948659	131948905	-	1	circRNA	ENST00000367976	CCN2	chr6:131949560-131949949	cellular communication network factor 2 [Source:HGNC Symbol;Acc:HGNC:2500]	GO:0001502(cartilage condensation);GO:0001503(ossification);GO:0001525(angiogenesis);GO:0001894(tissue homeostasis);GO:0001934(positive regulation of protein phosphorylation);GO:0001968(fibronectin binding);GO:0005178(integrin binding);GO:0005515(protein binding);GO:0005520(insulin-like growth factor binding);GO:0005576(extracellular region);GO:0005615(extracellular space);GO:0005801(cis-Golgi ne…	04371(Apelin signaling pathway);04390(Hippo signaling pathway)	NA
hsa_circ_0008234	inf	up	5.46139e-07	0.0328148	chr3	71041328	71053773	-	4	circRNA	ENST00000649528	FOXP1	chr3:71015653-71041327|chr3:71053773-71112535	forkhead box P1 [Source:HGNC Symbol;Acc:HGNC:3823]	GO:0000790(nuclear chromatin);GO:0000981(DNA-binding transcription factor activity, RNA polymerase II-specific);GO:0001046(core promoter sequence-specific DNA binding);GO:0002903(negative regulation of B cell apoptotic process);GO:0003677(DNA binding);GO:0003700(DNA-binding transcription factor activity);GO:0005515(protein binding);GO:0005634(nucleus);GO:0005654(nucleoplasm);GO:0006355(regulation…	05206(MicroRNAs in cancer)	NA
hsa_circ_0137815	-inf	down	5.44619e-07	0.0328896	chr9	120989046	120991280	-	3	circRNA	ENST00000223642	C5	chr9:120982814-120989045|chr9:120991280-120996239	complement C5 [Source:HGNC Symbol;Acc:HGNC:1331]	GO:0000187(activation of MAPK activity);GO:0001701(in utero embryonic development);GO:0002376(immune system process);GO:0004866(endopeptidase inhibitor activity);GO:0005102(signaling receptor binding);GO:0005515(protein binding);GO:0005576(extracellular region);GO:0005579(membrane attack complex);GO:0005615(extracellular space);GO:0006935(chemotaxis);GO:0006954(inflammatory response);GO:0006956(c…	04080(Neuroactive ligand-receptor interaction);04610(Complement and coagulation cascades);05020(Prion diseases);05133(Pertussis);05150(Staphylococcus aureus infection);05168(Herpes simplex virus 1 infection);05322(Systemic lupus erythematosus)	NA
ciRNA1534	inf	up	5.45133e-07	0.0330868	chr7	70460582	70462015	-	1	ciRNA	ENST00000644939	AUTS2	chr7:70460581-70462015	activator of transcription and developmental regulator AUTS2 [Source:HGNC Symbol;Acc:HGNC:14262]	GO:0001764(neuron migration);GO:0003682(chromatin binding);GO:0005515(protein binding);GO:0005575(cellular_component);GO:0005634(nucleus);GO:0005737(cytoplasm);GO:0005856(cytoskeleton);GO:0010592(positive regulation of lamellipodium assembly);GO:0015629(actin cytoskeleton);GO:0030426(growth cone);GO:0031532(actin cytoskeleton reorganization);GO:0035022(positive regulation of Rac protein signal tr…	NA	NA
hsa_circ_0029941	3.6294	up	5.4598e-07	0.0333048	chr13	32648754	32678929	+	9	circRNA	ENST00000315596	PDS5B	chr13:32586593-32648753|chr13:32678929-32683877	PDS5 cohesin associated factor B [Source:HGNC Symbol;Acc:HGNC:20418]	GO:0000775(chromosome, centromeric region);GO:0000785(chromatin);GO:0003677(DNA binding);GO:0005515(protein binding);GO:0005634(nucleus);GO:0005654(nucleoplasm);GO:0005694(chromosome);GO:0005829(cytosol);GO:0006281(DNA repair);GO:0007049(cell cycle);GO:0007064(mitotic sister chromatid cohesion);GO:0008283(cell population proliferation);GO:0008285(negative regulation of cell population proliferati…	NA	NA
circRNA26337	-inf	down	5.49596e-07	0.033693	chr8	1876572	1885707	+	4	circRNA	ENST00000635773	KBTBD11-OT1	chr8:1869316-1876571|chr8:1885707-1893569	KBTBD11 overlapping transcript 1 [Source:NCBI gene (formerly Entrezgene);Acc:104266957]	GO:0005739(mitochondrion);GO:0016020(membrane);GO:0016021(integral component of membrane);GO:0098793(presynapse)	NA	NA
circRNA14300	inf	up	5.48818e-07	0.0338127	chr12	47995267	47997673	+	5	circRNA	ENST00000337299	COL2A1	chr12:47994477-47995255|chr12:47997707-47997871	collagen type II alpha 1 chain [Source:HGNC Symbol;Acc:HGNC:2200]	GO:0001501(skeletal system development);GO:0001502(cartilage condensation);GO:0001503(ossification);GO:0001894(tissue homeostasis);GO:0001958(endochondral ossification);GO:0002062(chondrocyte differentiation);GO:0003007(heart morphogenesis);GO:0005201(extracellular matrix structural constituent);GO:0005515(protein binding);GO:0005576(extracellular region);GO:0005581(collagen trimer);GO:0005585(co…	04151(PI3K-Akt signaling pathway);04510(Focal adhesion);04512(ECM-receptor interaction);04974(Protein digestion and absorption);05165(Human papillomavirus infection)	NA
hsa_circ_0009084	-4.94302	down	5.46365e-07	0.0338282	chr3	43549720	43565727	-	4	circRNA	ENST00000292246	ANO10	chr3:43432727-43549719|chr3:43565727-43574808	anoctamin 10 [Source:HGNC Symbol;Acc:HGNC:25519]	GO:0005227(calcium activated cation channel activity);GO:0005229(intracellular calcium activated chloride channel activity);GO:0005886(plasma membrane);GO:0006812(cation transport);GO:0006821(chloride transport);GO:0016020(membrane);GO:0016021(integral component of membrane);GO:0034220(ion transmembrane transport);GO:0043231(intracellular membrane-bounded organelle);GO:0055085(transmembrane trans…	NA	NA
hsa_circ_0010458	-inf	down	5.45025e-07	0.0339114	chr1	20840856	20865262	-	10	circRNA	ENST00000374935	EIF4G3	chr1:20829272-20840855|chr1:20865262-20879322	eukaryotic translation initiation factor 4 gamma 3 [Source:HGNC Symbol;Acc:HGNC:3298]	GO:0000339(RNA cap binding);GO:0003723(RNA binding);GO:0003729(mRNA binding);GO:0003743(translation initiation factor activity);GO:0005515(protein binding);GO:0005829(cytosol);GO:0006412(translation);GO:0006413(translational initiation);GO:0006417(regulation of translation);GO:0006446(regulation of translational initiation);GO:0008135(translation factor activity, RNA binding);GO:0016281(eukaryoti…	03013(RNA transport);05416(Viral myocarditis)	NA
circRNA5927	inf	up	5.42367e-07	0.0339115	chr11	46076755	46084302	-	3	circRNA	ENST00000533757	PHF21A	chr11:46084302-46092183	PHD finger protein 21A [Source:HGNC Symbol;Acc:HGNC:24156]	GO:0000118(histone deacetylase complex);GO:0000122(negative regulation of transcription by RNA polymerase II);GO:0003677(DNA binding);GO:0003682(chromatin binding);GO:0005515(protein binding);GO:0005634(nucleus);GO:0005654(nucleoplasm);GO:0006325(chromatin organization);GO:0007596(blood coagulation);GO:0046872(metal ion binding);GO:1990391(DNA repair complex)	NA	NA
hsa_circ_0116601	-3.49616	down	5.40668e-07	0.0339702	chr22	40881770	40886515	+	2	circRNA	ENST00000428799	XPNPEP3	chr22:40870139-40881769|chr22:40886515-40907586	X-prolyl aminopeptidase 3 [Source:HGNC Symbol;Acc:HGNC:28052]	GO:0003094(glomerular filtration);GO:0004177(aminopeptidase activity);GO:0005515(protein binding);GO:0005737(cytoplasm);GO:0005739(mitochondrion);GO:0006508(proteolysis);GO:0008233(peptidase activity);GO:0008237(metallopeptidase activity);GO:0016485(protein processing);GO:0016787(hydrolase activity);GO:0030145(manganese ion binding);GO:0042803(protein homodimerization activity);GO:0046872(metal i…	NA	EC:3.4.11.9
hsa_circ_0068681	inf	up	5.4434e-07	0.0343669	chr3	197051577	197119530	-	13	circRNA	ENST00000346964	DLG1	chr3:197044729-197051576|chr3:197119530-197130526	discs large MAGUK scaffold protein 1 [Source:HGNC Symbol;Acc:HGNC:2900]	GO:0000122(negative regulation of transcription by RNA polymerase II);GO:0000165(MAPK cascade);GO:0001657(ureteric bud development);GO:0001658(branching involved in ureteric bud morphogenesis);GO:0001771(immunological synapse formation);GO:0001772(immunological synapse);GO:0001935(endothelial cell proliferation);GO:0002088(lens development in camera-type eye);GO:0002369(T cell cytokine production…	04390(Hippo signaling pathway);04530(Tight junction);04660(T cell receptor signaling pathway);05165(Human papillomavirus infection);05166(Human T-cell leukemia virus 1 infection);05203(Viral carcinogenesis)	NA
hsa_circ_0008027	-inf	down	5.45126e-07	0.0345828	chr3	9750945	9751949	+	2	circRNA	ENST00000302003	OGG1	chr3:9750423-9750944|chr3:9751949-9754703	8-oxoguanine DNA glycosylase [Source:HGNC Symbol;Acc:HGNC:8125]	GO:0002526(acute inflammatory response);GO:0003677(DNA binding);GO:0003684(damaged DNA binding);GO:0003824(catalytic activity);GO:0004519(endonuclease activity);GO:0005515(protein binding);GO:0005634(nucleus);GO:0005654(nucleoplasm);GO:0005739(mitochondrion);GO:0006281(DNA repair);GO:0006284(base-excision repair);GO:0006285(base-excision repair, AP site formation);GO:0006289(nucleotide-excision r…	03410(Base excision repair)	4.2.99.18
circRNA5400	inf	up	5.48075e-07	0.0349371	chr3	146189799	146222092	-	1	intergenic	intergenic_circRNA	intergenic_circRNA	chr3:146189798-146222092	NA	NA	NA	NA
circRNA12294	inf	up	5.46279e-07	0.0349891	chr14	49825868	49831361	-	6	circRNA	ENST00000557380	NEMF	chr14:49820456-49825867|chr14:49831361-49832051	nuclear export mediator factor [Source:HGNC Symbol;Acc:HGNC:10663]	GO:0000049(tRNA binding);GO:0005634(nucleus);GO:0043023(ribosomal large subunit binding);GO:0051168(nuclear export);GO:0072344(rescue of stalled ribosome);GO:1990112(RQC complex);GO:1990116(ribosome-associated ubiquitin-dependent protein catabolic process)	NA	NA
hsa_circ_0016867	-2.69189	down	5.44402e-07	0.035035	chr1	230663141	230671640	+	5	circRNA	ENST00000366669	COG2	chr1:230660823-230663140|chr1:230671640-230674997	component of oligomeric golgi complex 2 [Source:HGNC Symbol;Acc:HGNC:6546]	GO:0000139(Golgi membrane);GO:0005515(protein binding);GO:0005794(Golgi apparatus);GO:0005795(Golgi stack);GO:0005829(cytosol);GO:0006888(endoplasmic reticulum to Golgi vesicle-mediated transport);GO:0006891(intra-Golgi vesicle-mediated transport);GO:0007030(Golgi organization);GO:0015031(protein transport);GO:0016020(membrane);GO:0017119(Golgi transport complex);GO:0032588(trans-Golgi network me…	NA	NA
ciRNA2771	-inf	down	5.44151e-07	0.0351848	chr2	196912882	196923125	-	1	ciRNA	ENST00000354764	PGAP1	chr2:196912881-196923125	post-GPI attachment to proteins inositol deacylase 1 [Source:HGNC Symbol;Acc:HGNC:25712]	GO:0004518(nuclease activity);GO:0005783(endoplasmic reticulum);GO:0005789(endoplasmic reticulum membrane);GO:0006505(GPI anchor metabolic process);GO:0006506(GPI anchor biosynthetic process);GO:0006888(endoplasmic reticulum to Golgi vesicle-mediated transport);GO:0007605(sensory perception of sound);GO:0009880(embryonic pattern specification);GO:0009948(anterior/posterior axis specification);GO:…	00563(Glycosylphosphatidylinositol (GPI)-anchor biosynthesis)	NA
hsa_circ_0103919	-2.65375	down	5.43106e-07	0.0352829	chr15	55365188	55372044	-	2	circRNA	ENST00000442196	CCPG1	chr15:55360944-55365187|chr15:55372044-55376948	cell cycle progression 1 [Source:HGNC Symbol;Acc:HGNC:24227]	GO:0003674(molecular_function);GO:0005515(protein binding);GO:0007049(cell cycle);GO:0008284(positive regulation of cell population proliferation);GO:0016020(membrane);GO:0016021(integral component of membrane);GO:0045787(positive regulation of cell cycle);GO:0045944(positive regulation of transcription by RNA polymerase II);GO:2001106(regulation of Rho guanyl-nucleotide exchange factor activity)	NA	NA
circRNA12311	inf	up	5.48753e-07	0.0358171	chr11	65499249	65499423	+	1	intergenic	intergenic_circRNA	intergenic_circRNA	chr11:65499248-65499423	NA	NA	NA	NA
hsa_circ_0089172	inf	up	5.52216e-07	0.0362116	chr9	131174055	131178410	+	3	circRNA	ENST00000359428	NUP214	chr9:131164144-131174054|chr9:131178410-131187288	nucleoporin 214 [Source:HGNC Symbol;Acc:HGNC:8064]	GO:0000055(ribosomal large subunit export from nucleus);GO:0000056(ribosomal small subunit export from nucleus);GO:0000278(mitotic cell cycle);GO:0005049(nuclear export signal receptor activity);GO:0005515(protein binding);GO:0005634(nucleus);GO:0005635(nuclear envelope);GO:0005643(nuclear pore);GO:0005654(nucleoplasm);GO:0005829(cytosol);GO:0006110(regulation of glycolytic process);GO:0006405(RN…	03013(RNA transport)	NA
hsa_circ_0015453	inf	up	5.50577e-07	0.036272	chr1	179347600	179348942	+	2	circRNA	ENST00000539888	SOAT1	chr1:179345076-179347599|chr1:179348942-179350295	sterol O-acyltransferase 1 [Source:HGNC Symbol;Acc:HGNC:11177]	GO:0000062(fatty-acyl-CoA binding);GO:0004772(sterol O-acyltransferase activity);GO:0005515(protein binding);GO:0005783(endoplasmic reticulum);GO:0005789(endoplasmic reticulum membrane);GO:0006629(lipid metabolic process);GO:0008202(steroid metabolic process);GO:0008203(cholesterol metabolic process);GO:0008374(O-acyltransferase activity);GO:0010742(macrophage derived foam cell differentiation);G…	00100(Steroid biosynthesis);04979(Cholesterol metabolism)	NA
circRNA7738	inf	up	5.51657e-07	0.0365114	chr5	65242104	65273447	-	4	circRNA	ENST00000381055	ADAMTS6	chr5:65226219-65242103|chr5:65273447-65291328	ADAM metallopeptidase with thrombospondin type 1 motif 6 [Source:HGNC Symbol;Acc:HGNC:222]	GO:0001822(kidney development);GO:0003279(cardiac septum development);GO:0004222(metalloendopeptidase activity);GO:0005576(extracellular region);GO:0006508(proteolysis);GO:0007507(heart development);GO:0008233(peptidase activity);GO:0008237(metallopeptidase activity);GO:0016787(hydrolase activity);GO:0030198(extracellular matrix organization);GO:0031012(extracellular matrix);GO:0035904(aorta deve…	NA	NA
hsa_circ_0004206	-2.11669	down	5.52901e-07	0.0367624	chr12	111933886	111943369	-	5	circRNA	ENST00000550831	TMEM116	chr12:111932659-111933885|chr12:111943369-111991757	transmembrane protein 116 [Source:HGNC Symbol;Acc:HGNC:25084]	GO:0003674(molecular_function);GO:0005575(cellular_component);GO:0008150(biological_process);GO:0016020(membrane);GO:0016021(integral component of membrane)	NA	NA
hsa_circ_0007772	1.94026	up	5.52194e-07	0.0368838	chr1	213129527	213176492	+	3	circRNA	ENST00000543354	RPS6KC1	chr1:213117410-213129526|chr1:213176492-213230496	ribosomal protein S6 kinase C1 [Source:HGNC Symbol;Acc:HGNC:10439]	GO:0000166(nucleotide binding);GO:0004672(protein kinase activity);GO:0004674(protein serine/threonine kinase activity);GO:0005515(protein binding);GO:0005524(ATP binding);GO:0005737(cytoplasm);GO:0005768(endosome);GO:0005769(early endosome);GO:0006468(protein phosphorylation);GO:0007165(signal transduction);GO:0008289(lipid binding);GO:0016020(membrane);GO:0016301(kinase activity);GO:0016310(pho…	NA	NA
hsa_circ_0114049	2.52888	up	5.49866e-07	0.036896	chr1	70292388	70300908	-	3	circRNA	ENST00000370944	ANKRD13C	chr1:70276844-70292387|chr1:70300908-70306223	ankyrin repeat domain 13C [Source:HGNC Symbol;Acc:HGNC:25374]	GO:0005102(signaling receptor binding);GO:0005515(protein binding);GO:0005737(cytoplasm);GO:0005783(endoplasmic reticulum);GO:0005789(endoplasmic reticulum membrane);GO:0006621(protein retention in ER lumen);GO:0010869(regulation of receptor biosynthetic process);GO:0016020(membrane);GO:0048471(perinuclear region of cytoplasm);GO:2000209(regulation of anoikis)	NA	NA
hsa_circ_0007387	-3.76676	down	5.47405e-07	0.0368978	chr2	63404048	63439871	-	4	circRNA	ENST00000272321	WDPCP	chr2:63382094-63404047|chr2:63439871-63484603	WD repeat containing planar cell polarity effector [Source:HGNC Symbol;Acc:HGNC:28027]	GO:0001822(kidney development);GO:0002093(auditory receptor cell morphogenesis);GO:0005515(protein binding);GO:0005737(cytoplasm);GO:0005856(cytoskeleton);GO:0005886(plasma membrane);GO:0005929(cilium);GO:0005930(axoneme);GO:0005938(cell cortex);GO:0007224(smoothened signaling pathway);GO:0007399(nervous system development);GO:0010762(regulation of fibroblast migration);GO:0016020(membrane);GO:00…	NA	NA
circRNA12667	4.01294	up	5.54618e-07	0.0375532	chr13	49993793	50044768	-	5	circRNA	ENST00000621282	DLEU2	chr13:49988621-49993792|chr13:50044768-50045117	deleted in lymphocytic leukemia 2 [Source:HGNC Symbol;Acc:HGNC:13748]	NA	NA	NA
hsa_circ_0103945	3.57774	up	5.53179e-07	0.0376245	chr15	56383952	56412436	+	7	circRNA	ENST00000352903	TEX9	chr15:56373504-56383951|chr15:56412436-56427604	testis expressed 9 [Source:HGNC Symbol;Acc:HGNC:29585]	GO:0005515(protein binding)	NA	NA
hsa_circ_0067745	-4.13878	down	5.53028e-07	0.0377828	chr3	154217869	154240579	+	3	circRNA	ENST00000356448	ARHGEF26	chr3:154194718-154217868|chr3:154240579-154253115	Rho guanine nucleotide exchange factor 26 [Source:HGNC Symbol;Acc:HGNC:24490]	GO:0001726(ruffle);GO:0001886(endothelial cell morphogenesis);GO:0005085(guanyl-nucleotide exchange factor activity);GO:0005089(Rho guanyl-nucleotide exchange factor activity);GO:0005515(protein binding);GO:0005829(cytosol);GO:0007186(G protein-coupled receptor signaling pathway);GO:0042995(cell projection);GO:0043065(positive regulation of apoptotic process);GO:0051056(regulation of small GTPase…	05100(Bacterial invasion of epithelial cells)	NA
hsa_circ_0111889	-4.54323	down	5.53303e-07	0.0379704	chr1	212329135	212345933	+	4	circRNA	ENST00000261461	PPP2R5A	chr1:212286291-212329134|chr1:212345933-212347346	protein phosphatase 2 regulatory subunit B'alpha [Source:HGNC Symbol;Acc:HGNC:9309]	GO:0000159(protein phosphatase type 2A complex);GO:0000775(chromosome, centromeric region);GO:0004721(phosphoprotein phosphatase activity);GO:0005515(protein binding);GO:0005634(nucleus);GO:0005694(chromosome);GO:0005737(cytoplasm);GO:0005813(centrosome);GO:0005829(cytosol);GO:0006470(protein dephosphorylation);GO:0007165(signal transduction);GO:0016020(membrane);GO:0019888(protein phosphatase re…	03015(mRNA surveillance pathway);04071(Sphingolipid signaling pathway);04114(Oocyte meiosis);04151(PI3K-Akt signaling pathway);04152(AMPK signaling pathway);04261(Adrenergic signaling in cardiomyocytes);04728(Dopaminergic synapse);05165(Human papillomavirus infection)	NA
hsa_circ_0030582	-inf	down	5.51533e-07	0.0380172	chr13	95115922	95188542	-	11	circRNA	ENST00000645237	ABCC4	chr13:95083290-95115921|chr13:95188542-95194835	ATP binding cassette subfamily C member 4 [Source:HGNC Symbol;Acc:HGNC:55]	GO:0000166(nucleotide binding);GO:0002576(platelet degranulation);GO:0005515(protein binding);GO:0005524(ATP binding);GO:0005886(plasma membrane);GO:0010033(response to organic substance);GO:0010243(response to organonitrogen compound);GO:0014070(response to organic cyclic compound);GO:0015562(efflux transmembrane transporter activity);GO:0015662(ion transmembrane transporter activity, phosphoryl…	01523(Antifolate resistance);02010(ABC transporters);04024(cAMP signaling pathway);04976(Bile secretion)	NA
circRNA26501	-inf	down	5.49934e-07	0.0380747	chr10	71828956	71831251	-	2	circRNA	ENST00000394934	PSAP	chr10:71828157-71828877|chr10:71831251-71831846	prosaposin [Source:HGNC Symbol;Acc:HGNC:9498]	GO:0001664(G protein-coupled receptor binding);GO:0001865(NK T cell differentiation);GO:0002020(protease binding);GO:0002576(platelet degranulation);GO:0003335(corneocyte development);GO:0004565(beta-galactosidase activity);GO:0005515(protein binding);GO:0005543(phospholipid binding);GO:0005576(extracellular region);GO:0005615(extracellular space);GO:0005737(cytoplasm);GO:0005764(lysosome);GO:000…	04142(Lysosome)	NA
hsa_circ_0120782	inf	up	5.49698e-07	0.038226	chr2	65500629	65501147	+	1	circRNA	ENST00000377977	AC007389	chr2:65476349-65500628|chr2:65501147-65691781	novel transcript	NA	NA	NA
circRNA20833	-3.42661	down	5.50579e-07	0.0384552	X	155415575	155419562	-	1	intergenic	intergenic_circRNA	intergenic_circRNA	X:155415574-155419562	NA	NA	NA	NA
hsa_circ_0079860	-4.39837	down	5.51679e-07	0.0387003	chr7	35879823	35890793	+	5	circRNA	ENST00000399034	SEPTIN7	chr7:35873775-35879822|chr7:35890793-35898247	septin 7 [Source:HGNC Symbol;Acc:HGNC:1717]	GO:0000166(nucleotide binding);GO:0000775(chromosome, centromeric region);GO:0000776(kinetochore);GO:0000777(condensed chromosome kinetochore);GO:0001725(stress fiber);GO:0003924(GTPase activity);GO:0005198(structural molecule activity);GO:0005515(protein binding);GO:0005525(GTP binding);GO:0005634(nucleus);GO:0005694(chromosome);GO:0005737(cytoplasm);GO:0005819(spindle);GO:0005829(cytosol);GO:00…	NA	NA
ciRNA63	inf	up	5.5052e-07	0.0387869	chr17	15742480	15742888	+	1	ciRNA	ENST00000413242	AC005324	chr17:15742479-15742908	novel transcript	NA	NA	NA
circRNA2300	2.47303	up	5.5209e-07	0.0390659	chr7	70762870	70771644	+	5	circRNA	ENST00000644939	AUTS2	chr7:70698620-70762869|chr7:70771644-70774027	activator of transcription and developmental regulator AUTS2 [Source:HGNC Symbol;Acc:HGNC:14262]	GO:0001764(neuron migration);GO:0003682(chromatin binding);GO:0005515(protein binding);GO:0005575(cellular_component);GO:0005634(nucleus);GO:0005737(cytoplasm);GO:0005856(cytoskeleton);GO:0010592(positive regulation of lamellipodium assembly);GO:0015629(actin cytoskeleton);GO:0030426(growth cone);GO:0031532(actin cytoskeleton reorganization);GO:0035022(positive regulation of Rac protein signal tr…	NA	NA
hsa_circ_0002372	inf	up	5.49956e-07	0.0390826	X	139814878	139826823	-	4	circRNA	ENST00000370557	ATP11C	X:139804599-139814877|X:139826823-139932015	ATPase phospholipid transporting 11C [Source:HGNC Symbol;Acc:HGNC:13554]	GO:0000166(nucleotide binding);GO:0000287(magnesium ion binding);GO:0002329(pre-B cell differentiation);GO:0005515(protein binding);GO:0005524(ATP binding);GO:0005765(lysosomal membrane);GO:0005783(endoplasmic reticulum);GO:0005789(endoplasmic reticulum membrane);GO:0005802(trans-Golgi network);GO:0005886(plasma membrane);GO:0006869(lipid transport);GO:0015914(phospholipid transport);GO:0016020(m…	NA	EC:7.6.2.1
hsa_circ_0083952	3.65567	up	5.53513e-07	0.0395042	chr8	38110379	38110833	+	2	circRNA	ENST00000545394	ASH2L	chr8:38106444-38110378|chr8:38110833-38114191	ASH2 like, histone lysine methyltransferase complex subunit [Source:HGNC Symbol;Acc:HGNC:744]	GO:0000976(transcription regulatory region sequence-specific DNA binding);GO:0003677(DNA binding);GO:0005515(protein binding);GO:0005634(nucleus);GO:0005654(nucleoplasm);GO:0005719(nuclear euchromatin);GO:0006325(chromatin organization);GO:0006974(cellular response to DNA damage stimulus);GO:0008013(beta-catenin binding);GO:0008284(positive regulation of cell population proliferation);GO:0030097(…	04934(Cushing syndrome)	NA
circRNA27986	-inf	down	5.51923e-07	0.0395591	chr1	197642712	197715074	-	8	circRNA	ENST00000367396	DENND1B	chr1:197617759-197642711|chr1:197715074-197772868	DENN domain containing 1B [Source:HGNC Symbol;Acc:HGNC:28404]	GO:0005085(guanyl-nucleotide exchange factor activity);GO:0005737(cytoplasm);GO:0005829(cytosol);GO:0006897(endocytosis);GO:0015031(protein transport);GO:0016607(nuclear speck);GO:0017112(Rab guanyl-nucleotide exchange factor activity);GO:0017137(Rab GTPase binding);GO:0030136(clathrin-coated vesicle);GO:0031410(cytoplasmic vesicle);GO:0032456(endocytic recycling);GO:0035745(T-helper 2 cell cytok…	NA	NA
hsa_circ_0002981	2.92977	up	5.57321e-07	0.040116	chr2	135748267	135761911	+	5	circRNA	ENST00000272638	UBXN4	chr2:135742011-135748266|chr2:135761911-135769768	UBX domain protein 4 [Source:HGNC Symbol;Acc:HGNC:14860]	GO:0005515(protein binding);GO:0005634(nucleus);GO:0005635(nuclear envelope);GO:0005783(endoplasmic reticulum);GO:0005789(endoplasmic reticulum membrane);GO:0005829(cytosol);GO:0006986(response to unfolded protein);GO:0016020(membrane);GO:0030433(ubiquitin-dependent ERAD pathway)	NA	NA
ciRNA1546	inf	up	5.57179e-07	0.0402757	chr1	26457167	26463433	-	1	ciRNA	ENST00000434391	DHDDS	chr1:26457166-26463433	dehydrodolichyl diphosphate synthase subunit [Source:HGNC Symbol;Acc:HGNC:20603]	GO:0002094(polyprenyltransferase activity);GO:0005515(protein binding);GO:0005783(endoplasmic reticulum);GO:0005789(endoplasmic reticulum membrane);GO:0006486(protein glycosylation);GO:0006489(dolichyl diphosphate biosynthetic process);GO:0006629(lipid metabolic process);GO:0016020(membrane);GO:0016094(polyprenol biosynthetic process);GO:0016740(transferase activity);GO:0016765(transferase activi…	00900(Terpenoid backbone biosynthesis)	EC:2.5.1.87
circRNA5188	inf	up	5.59338e-07	0.0406024	chr15	88848005	88849669	-	2	circRNA	ENST00000561243	ACAN	chr15:88847417-88847911|chr15:88849731-88851794	aggrecan [Source:HGNC Symbol;Acc:HGNC:319]	GO:0001501(skeletal system development);GO:0001502(cartilage condensation);GO:0002063(chondrocyte development);GO:0005201(extracellular matrix structural constituent);GO:0005509(calcium ion binding);GO:0005515(protein binding);GO:0005540(hyaluronic acid binding);GO:0005576(extracellular region);GO:0005604(basement membrane);GO:0005796(Golgi lumen);GO:0006508(proteolysis);GO:0007155(cell adhesion)…	NA	NA
hsa_circ_0098928	-4.63634	down	5.57244e-07	0.0406203	chr12	62484170	62501698	+	6	circRNA	ENST00000641654	MON2	chr12:62467318-62484169|chr12:62501698-62508285	MON2 homolog, regulator of endosome-to-Golgi trafficking [Source:HGNC Symbol;Acc:HGNC:29177]	GO:0005515(protein binding);GO:0005829(cytosol);GO:0006895(Golgi to endosome transport);GO:0015031(protein transport);GO:0070062(extracellular exosome)	NA	NA
hsa_circ_0095312	inf	up	5.56495e-07	0.0407354	chr11	126018330	126021520	-	3	circRNA	ENST00000392693	CDON	chr11:126017375-126018329|chr11:126021520-126023400	cell adhesion associated, oncogene regulated [Source:HGNC Symbol;Acc:HGNC:17104]	GO:0001708(cell fate specification);GO:0001934(positive regulation of protein phosphorylation);GO:0002088(lens development in camera-type eye);GO:0005515(protein binding);GO:0005886(plasma membrane);GO:0005887(integral component of plasma membrane);GO:0007155(cell adhesion);GO:0007224(smoothened signaling pathway);GO:0007520(myoblast fusion);GO:0009952(anterior/posterior pattern specification);GO…	04340(Hedgehog signaling pathway)	NA
hsa_circ_0000184	inf	up	5.54459e-07	0.0407555	chr1	215575901	215579137	+	4	circRNA	ENST00000259154	KCTD3	chr1:215574118-215575900|chr1:215579137-215579908	potassium channel tetramerization domain containing 3 [Source:HGNC Symbol;Acc:HGNC:21305]	GO:0005515(protein binding);GO:0005886(plasma membrane);GO:0016020(membrane);GO:0051260(protein homooligomerization)	NA	NA
circRNA7183	inf	up	5.54054e-07	0.0408947	chr20	2947982	2965202	+	3	circRNA	ENST00000380393	PTPRA	chr20:2923285-2947981|chr20:2965202-2975214	protein tyrosine phosphatase receptor type A [Source:HGNC Symbol;Acc:HGNC:9664]	GO:0000165(MAPK cascade);GO:0004721(phosphoprotein phosphatase activity);GO:0004725(protein tyrosine phosphatase activity);GO:0005001(transmembrane receptor protein tyrosine phosphatase activity);GO:0005515(protein binding);GO:0005886(plasma membrane);GO:0005887(integral component of plasma membrane);GO:0005925(focal adhesion);GO:0006468(protein phosphorylation);GO:0006470(protein dephosphorylati…	NA	NA
ciRNA2812	-inf	down	5.53985e-07	0.0410586	chr15	44331988	44339481	+	1	ciRNA	ENST00000299957	GOLM2	chr15:44331987-44339481	golgi membrane protein 2 [Source:HGNC Symbol;Acc:HGNC:24892]	GO:0005794(Golgi apparatus);GO:0016020(membrane);GO:0016021(integral component of membrane)	NA	NA
circRNA26651	-inf	down	5.52054e-07	0.0410838	chr18	9182383	9239556	+	7	circRNA	ENST00000400020	ANKRD12	chr18:9137873-9182382|chr18:9258931-9263790	ankyrin repeat domain 12 [Source:HGNC Symbol;Acc:HGNC:29135]	GO:0005515(protein binding);GO:0005634(nucleus);GO:0005654(nucleoplasm);GO:0005829(cytosol)	NA	NA
hsa_circ_0002182	inf	up	5.51373e-07	0.0412013	chr20	48953556	48969277	+	4	circRNA	ENST00000371917	ARFGEF2	chr20:48952884-48953555|chr20:48969277-48971119	ADP ribosylation factor guanine nucleotide exchange factor 2 [Source:HGNC Symbol;Acc:HGNC:15853]	GO:0000139(Golgi membrane);GO:0001881(receptor recycling);GO:0005085(guanyl-nucleotide exchange factor activity);GO:0005086(ARF guanyl-nucleotide exchange factor activity);GO:0005515(protein binding);GO:0005737(cytoplasm);GO:0005768(endosome);GO:0005794(Golgi apparatus);GO:0005802(trans-Golgi network);GO:0005815(microtubule organizing center);GO:0005829(cytosol);GO:0005856(cytoskeleton);GO:000587…	04144(Endocytosis)	NA
hsa_circ_0032436	3.7661	up	5.51084e-07	0.0413478	chr14	71019009	71036157	+	8	circRNA	ENST00000304743	PCNX1	chr14:71013202-71019008|chr14:71036157-71045132	pecanex 1 [Source:HGNC Symbol;Acc:HGNC:19740]	GO:0016020(membrane);GO:0016021(integral component of membrane)	NA	NA
hsa_circ_0132829	-inf	down	5.49041e-07	0.041362	chr7	102848660	102849400	+	1	ciRNA	ENST00000379305	FBXL13	chr7:102848659-102849400	F-box and leucine rich repeat protein 13 [Source:HGNC Symbol;Acc:HGNC:21658]	GO:0000209(protein polyubiquitination);GO:0005515(protein binding);GO:0005737(cytoplasm);GO:0005829(cytosol);GO:0005856(cytoskeleton);GO:0005929(cilium);GO:0006511(ubiquitin-dependent protein catabolic process);GO:0019005(SCF ubiquitin ligase complex);GO:0031146(SCF-dependent proteasomal ubiquitin-dependent protein catabolic process);GO:0031514(motile cilium);GO:0042995(cell projection);GO:004368…	NA	NA
circRNA9232	inf	up	5.48573e-07	0.041494	chr17	50185284	50185429	+	1	circRNA	ENST00000225964	COL1A1	chr17:50185648-50185778	collagen type I alpha 1 chain [Source:HGNC Symbol;Acc:HGNC:2197]	GO:0001501(skeletal system development);GO:0001503(ossification);GO:0001568(blood vessel development);GO:0001649(osteoblast differentiation);GO:0001957(intramembranous ossification);GO:0001958(endochondral ossification);GO:0002020(protease binding);GO:0005201(extracellular matrix structural constituent);GO:0005515(protein binding);GO:0005576(extracellular region);GO:0005581(collagen trimer);GO:00…	04151(PI3K-Akt signaling pathway);04510(Focal adhesion);04512(ECM-receptor interaction);04611(Platelet activation);04926(Relaxin signaling pathway);04933(AGE-RAGE signaling pathway in diabetic complications);04974(Protein digestion and absorption);05146(Amoebiasis);05165(Human papillomavirus infection)	NA
circRNA5660	inf	up	5.48763e-07	0.0416758	chr5	83537008	83555038	+	5	circRNA	ENST00000265077	VCAN	chr5:83522309-83537007|chr5:83555038-83572416	versican [Source:HGNC Symbol;Acc:HGNC:2464]	GO:0001501(skeletal system development);GO:0001649(osteoblast differentiation);GO:0001750(photoreceptor outer segment);GO:0005509(calcium ion binding);GO:0005515(protein binding);GO:0005539(glycosaminoglycan binding);GO:0005540(hyaluronic acid binding);GO:0005576(extracellular region);GO:0005615(extracellular space);GO:0005788(endoplasmic reticulum lumen);GO:0005796(Golgi lumen);GO:0007155(cell a…	04514(Cell adhesion molecules (CAMs))	NA
hsa_circ_0008649	-inf	down	5.47042e-07	0.0417119	chr9	127925107	127925979	-	2	circRNA	ENST00000388747	PIP5KL1	chr9:127922114-127925106|chr9:127925979-127927152	phosphatidylinositol-4-phosphate 5-kinase like 1 [Source:HGNC Symbol;Acc:HGNC:28711]	GO:0000166(nucleotide binding);GO:0001933(negative regulation of protein phosphorylation);GO:0005524(ATP binding);GO:0005737(cytoplasm);GO:0005829(cytosol);GO:0010917(negative regulation of mitochondrial membrane potential);GO:0016020(membrane);GO:0016301(kinase activity);GO:0016307(phosphatidylinositol phosphate kinase activity);GO:0016308(1-phosphatidylinositol-4-phosphate 5-kinase activity);GO…	00562(Inositol phosphate metabolism);04144(Endocytosis)	EC:2.7.1.68
circRNA23765	-inf	down	5.4913e-07	0.0420387	chr11	73707421	73720899	-	4	circRNA	ENST00000400470	RAB6A	chr11:73704215-73707420|chr11:73720899-73730765	RAB6A, member RAS oncogene family [Source:HGNC Symbol;Acc:HGNC:9786]	GO:0000139(Golgi membrane);GO:0000166(nucleotide binding);GO:0003924(GTPase activity);GO:0005515(protein binding);GO:0005525(GTP binding);GO:0005789(endoplasmic reticulum membrane);GO:0005794(Golgi apparatus);GO:0005802(trans-Golgi network);GO:0005829(cytosol);GO:0005886(plasma membrane);GO:0006886(intracellular protein transport);GO:0006890(retrograde vesicle-mediated transport, Golgi to endopla…	NA	NA
hsa_circ_0125177	inf	up	5.47179e-07	0.0420562	chr4	119268268	119272034	+	3	circRNA	ENST00000274030	USP53	chr4:119267482-119268267|chr4:119272034-119273631	ubiquitin specific peptidase 53 [Source:HGNC Symbol;Acc:HGNC:29255]	GO:0001508(action potential);GO:0005515(protein binding);GO:0005575(cellular_component);GO:0005911(cell-cell junction);GO:0005923(bicellular tight junction);GO:0006915(apoptotic process);GO:0007605(sensory perception of sound);GO:0008150(biological_process);GO:0010996(response to auditory stimulus);GO:0016579(protein deubiquitination);GO:0030054(cell junction);GO:0036459(thiol-dependent ubiquitin…	NA	NA
circRNA5912	2.6661	up	5.45422e-07	0.0420875	chr3	100862312	100902686	-	12	circRNA	ENST00000495063	ABI3BP	chr3:100851940-100862311|chr3:100902686-100926302	ABI family member 3 binding protein [Source:HGNC Symbol;Acc:HGNC:17265]	GO:0005201(extracellular matrix structural constituent);GO:0005515(protein binding);GO:0005576(extracellular region);GO:0005615(extracellular space);GO:0062023(collagen-containing extracellular matrix)	NA	NA
circRNA5350	inf	up	5.44065e-07	0.0421487	chr10	45939361	45965855	-	1	intergenic	intergenic_circRNA	intergenic_circRNA	chr10:45939360-45965855	NA	NA	NA	NA
hsa_circ_0088300	-2.57535	down	5.52926e-07	0.0430038	chr9	120831331	120833456	-	3	circRNA	ENST00000210313	PSMD5	chr9:120829208-120831330|chr9:120833456-120842736	proteasome 26S subunit, non-ATPase 5 [Source:HGNC Symbol;Acc:HGNC:9563]	GO:0000165(MAPK cascade);GO:0000209(protein polyubiquitination);GO:0000502(proteasome complex);GO:0002223(stimulatory C-type lectin receptor signaling pathway);GO:0002479(antigen processing and presentation of exogenous peptide antigen via MHC class I, TAP-dependent);GO:0005515(protein binding);GO:0005654(nucleoplasm);GO:0005829(cytosol);GO:0006521(regulation of cellular amino acid metabolic proc…	NA	NA
circRNA29685	-inf	down	5.50862e-07	0.0430113	chr15	63696125	63716473	-	6	circRNA	ENST00000561400	HERC1	chr15:63716473-63774694	HECT and RLD domain containing E3 ubiquitin protein ligase family member 1 [Source:HGNC Symbol;Acc:HGNC:4867]	GO:0004842(ubiquitin-protein transferase activity);GO:0005085(guanyl-nucleotide exchange factor activity);GO:0005086(ARF guanyl-nucleotide exchange factor activity);GO:0005515(protein binding);GO:0005737(cytoplasm);GO:0005794(Golgi apparatus);GO:0005829(cytosol);GO:0010507(negative regulation of autophagy);GO:0016020(membrane);GO:0016567(protein ubiquitination);GO:0016740(transferase activity);GO…	04120(Ubiquitin mediated proteolysis)	EC:2.3.2.26
circRNA14192	inf	up	5.53008e-07	0.0433475	chr2	189007537	189008990	+	1	intergenic	intergenic_circRNA	intergenic_circRNA	chr2:189007536-189008990	NA	NA	NA	NA
circRNA2825	-3.07165	down	5.51383e-07	0.0433883	chr5	55968276	55969855	-	2	circRNA	ENST00000381298	IL6ST	chr5:55964312-55968275|chr5:55969855-55976214	interleukin 6 signal transducer [Source:HGNC Symbol;Acc:HGNC:6021]	GO:0002675(positive regulation of acute inflammatory response);GO:0002821(positive regulation of adaptive immune response);GO:0004896(cytokine receptor activity);GO:0004897(ciliary neurotrophic factor receptor activity);GO:0004915(interleukin-6 receptor activity);GO:0004921(interleukin-11 receptor activity);GO:0004923(leukemia inhibitory factor receptor activity);GO:0004924(oncostatin-M receptor …	04060(Cytokine-cytokine receptor interaction);04550(Signaling pathways regulating pluripotency of stem cells);04630(Jak-STAT signaling pathway);04659(Th17 cell differentiation);05167(Kaposi sarcoma-associated herpesvirus infection);05200(Pathways in cancer);05203(Viral carcinogenesis)	NA
circRNA5089	0.431735	up	5.49548e-07	0.0434115	chr2	71396142	71418639	+	11	circRNA	ENST00000264447	ZNF638	chr2:71380565-71396141|chr2:71418639-71422814	zinc finger protein 638 [Source:HGNC Symbol;Acc:HGNC:17894]	GO:0003676(nucleic acid binding);GO:0003677(DNA binding);GO:0003690(double-stranded DNA binding);GO:0003723(RNA binding);GO:0005634(nucleus);GO:0005654(nucleoplasm);GO:0005737(cytoplasm);GO:0008270(zinc ion binding);GO:0008380(RNA splicing);GO:0016607(nuclear speck);GO:0043231(intracellular membrane-bounded organelle);GO:0046872(metal ion binding)	NA	NA
hsa_circ_0107359	inf	up	5.48817e-07	0.0435212	chr17	61972727	61983114	-	2	circRNA	ENST00000397786	MED13	chr17:61968258-61972726|chr17:61983114-61984170	mediator complex subunit 13 [Source:HGNC Symbol;Acc:HGNC:22474]	GO:0003712(transcription coregulator activity);GO:0003713(transcription coactivator activity);GO:0005634(nucleus);GO:0005654(nucleoplasm);GO:0006357(regulation of transcription by RNA polymerase II);GO:0006367(transcription initiation from RNA polymerase II promoter);GO:0016020(membrane);GO:0016592(mediator complex);GO:0030374(nuclear receptor transcription coactivator activity);GO:0042632(choles…	04919(Thyroid hormone signaling pathway)	NA
hsa_circ_0133850	inf	up	5.47523e-07	0.0435856	chr7	158901739	158906091	+	3	circRNA	ENST00000407559	WDR60	chr7:158891333-158901738|chr7:158906091-158911549	WD repeat domain 60 [Source:HGNC Symbol;Acc:HGNC:21862]	GO:0000242(pericentriolar material);GO:0000922(spindle pole);GO:0005515(protein binding);GO:0005615(extracellular space);GO:0005813(centrosome);GO:0005868(cytoplasmic dynein complex);GO:0005929(cilium);GO:0007018(microtubule-based movement);GO:0030030(cell projection organization);GO:0031021(interphase microtubule organizing center);GO:0035735(intraciliary transport involved in cilium assembly);G…	NA	NA
hsa_circ_0006135	3.24456	up	5.4547e-07	0.0435885	chr3	93995874	94003908	+	2	circRNA	ENST00000471138	ARL13B	chr3:93980482-93995873|chr3:94003908-94035330	ADP ribosylation factor like GTPase 13B [Source:HGNC Symbol;Acc:HGNC:25419]	GO:0000166(nucleotide binding);GO:0001947(heart looping);GO:0005515(protein binding);GO:0005525(GTP binding);GO:0005886(plasma membrane);GO:0005929(cilium);GO:0005930(axoneme);GO:0007224(smoothened signaling pathway);GO:0007368(determination of left/right symmetry);GO:0009953(dorsal/ventral pattern formation);GO:0010226(response to lithium ion);GO:0016020(membrane);GO:0021532(neural tube patterni…	NA	NA
circRNA14161	inf	up	5.43614e-07	0.043606	chr13	28256293	28281379	+	11	circRNA	ENST00000399613	PAN3	chr13:28220378-28256292|chr13:28281379-28287984	poly(A) specific ribonuclease subunit PAN3 [Source:HGNC Symbol;Acc:HGNC:29991]	GO:0000166(nucleotide binding);GO:0000288(nuclear-transcribed mRNA catabolic process, deadenylation-dependent decay);GO:0000289(nuclear-transcribed mRNA poly(A) tail shortening);GO:0000290(deadenylation-dependent decapping of nuclear-transcribed mRNA);GO:0000932(P-body);GO:0003723(RNA binding);GO:0004535(poly(A)-specific ribonuclease activity);GO:0004672(protein kinase activity);GO:0005515(protei…	03018(RNA degradation)	NA
circRNA23683	-inf	down	5.41811e-07	0.0436266	chr7	42591381	42598349	-	1	intergenic	intergenic_circRNA	intergenic_circRNA	chr7:42591380-42598349	NA	NA	NA	NA
circRNA2321	inf	up	5.41456e-07	0.0437632	chr7	85121741	85153739	-	2	circRNA	ENST00000444867	SEMA3D	chr7:85097965-85121740|chr7:85153739-85186677	semaphorin 3D [Source:HGNC Symbol;Acc:HGNC:10726]	GO:0001755(neural crest cell migration);GO:0005515(protein binding);GO:0005576(extracellular region);GO:0005615(extracellular space);GO:0005887(integral component of plasma membrane);GO:0007275(multicellular organism development);GO:0007399(nervous system development);GO:0007411(axon guidance);GO:0016020(membrane);GO:0016021(integral component of membrane);GO:0030154(cell differentiation);GO:0030…	04360(Axon guidance)	NA
circRNA23519	-inf	down	5.39477e-07	0.0437677	chr10	122392304	122424959	+	10	circRNA	ENST00000392799	PLEKHA1	chr10:122387983-122392303|chr10:122424959-122426942	pleckstrin homology domain containing A1 [Source:HGNC Symbol;Acc:HGNC:14335]	GO:0001553(luteinization);GO:0005515(protein binding);GO:0005634(nucleus);GO:0005654(nucleoplasm);GO:0005737(cytoplasm);GO:0005829(cytosol);GO:0005886(plasma membrane);GO:0006661(phosphatidylinositol biosynthetic process);GO:0007283(spermatogenesis);GO:0008209(androgen metabolic process);GO:0008210(estrogen metabolic process);GO:0008289(lipid binding);GO:0008585(female gonad development);GO:00097…	NA	NA
hsa_circ_0002191	inf	up	5.38816e-07	0.0438785	chr9	94773002	94801002	+	3	circRNA	ENST00000277198	AOPEP	chr9:94760580-94773001|chr9:94801002-94923985	aminopeptidase O (putative) [Source:HGNC Symbol;Acc:HGNC:1361]	GO:0002003(angiotensin maturation);GO:0004177(aminopeptidase activity);GO:0005634(nucleus);GO:0005730(nucleolus);GO:0005737(cytoplasm);GO:0005829(cytosol);GO:0006508(proteolysis);GO:0008233(peptidase activity);GO:0008237(metallopeptidase activity);GO:0008270(zinc ion binding);GO:0016787(hydrolase activity);GO:0046872(metal ion binding);GO:0070006(metalloaminopeptidase activity)	NA	NA
circRNA5904	-3.05758	down	5.36822e-07	0.0438798	chr10	12215741	12238485	+	5	circRNA	ENST00000378900	CDC123	chr10:12210322-12215740|chr10:12238485-12246149	cell division cycle 123 [Source:HGNC Symbol;Acc:HGNC:16827]	GO:0005737(cytoplasm);GO:0007049(cell cycle);GO:0007050(cell cycle arrest);GO:0008284(positive regulation of cell population proliferation);GO:0045948(positive regulation of translational initiation);GO:0051301(cell division);GO:1905143(eukaryotic translation initiation factor 2 complex assembly)	NA	NA
ciRNA902	-6.70437	down	5.36122e-07	0.0439862	chr6	31271073	31355592	-	1	ciRNA	ENST00000640615	HLA-B	chr6:31271072-31355592	major histocompatibility complex, class I, B [Source:HGNC Symbol;Acc:HGNC:4932]	GO:0000139(Golgi membrane);GO:0001916(positive regulation of T cell mediated cytotoxicity);GO:0002250(adaptive immune response);GO:0002376(immune system process);GO:0002474(antigen processing and presentation of peptide antigen via MHC class I);GO:0002479(antigen processing and presentation of exogenous peptide antigen via MHC class I, TAP-dependent);GO:0002480(antigen processing and presentation…	04144(Endocytosis);04145(Phagosome);04218(Cellular senescence);04514(Cell adhesion molecules (CAMs));04612(Antigen processing and presentation);04650(Natural killer cell mediated cytotoxicity);04940(Type I diabetes mellitus);05163(Human cytomegalovirus infection);05165(Human papillomavirus infection);05166(Human T-cell leukemia virus 1 infection);05167(Kaposi sarcoma-associated herpesvirus infect…	NA
circRNA12230	inf	up	5.42388e-07	0.0446657	chr3	129463561	129469417	+	3	circRNA	ENST00000511498	IFT122	chr3:129461501-129463560|chr3:129469417-129476315	intraflagellar transport 122 [Source:HGNC Symbol;Acc:HGNC:13556]	GO:0001843(neural tube closure);GO:0005515(protein binding);GO:0005654(nucleoplasm);GO:0005737(cytoplasm);GO:0005829(cytosol);GO:0005856(cytoskeleton);GO:0005929(cilium);GO:0007227(signal transduction downstream of smoothened);GO:0007275(multicellular organism development);GO:0009953(dorsal/ventral pattern formation);GO:0010172(embryonic body morphogenesis);GO:0016020(membrane);GO:0021914(negativ…	NA	NA
circRNA24369	-inf	down	5.43499e-07	0.0449229	chr10	48325897	48410168	+	6	circRNA	ENST00000374179	MAPK8	chr10:48308288-48325896|chr10:48410168-48420154	mitogen-activated protein kinase 8 [Source:HGNC Symbol;Acc:HGNC:6881]	GO:0000165(MAPK cascade);GO:0000166(nucleotide binding);GO:0004672(protein kinase activity);GO:0004674(protein serine/threonine kinase activity);GO:0004705(JUN kinase activity);GO:0004707(MAP kinase activity);GO:0005515(protein binding);GO:0005524(ATP binding);GO:0005634(nucleus);GO:0005654(nucleoplasm);GO:0005737(cytoplasm);GO:0005739(mitochondrion);GO:0005829(cytosol);GO:0006468(protein phospho…	01522(Endocrine resistance);04010(MAPK signaling pathway);04012(ErbB signaling pathway);04014(Ras signaling pathway);04024(cAMP signaling pathway);04068(FoxO signaling pathway);04071(Sphingolipid signaling pathway);04137(Mitophagy - animal);04140(Autophagy - animal);04141(Protein processing in endoplasmic reticulum);04210(Apoptosis);04215(Apoptosis - multiple species);04217(Necroptosis);04310(Wnt…	NA
circRNA5114	3.29295	up	5.41587e-07	0.0449301	chr12	111479071	111486824	-	4	circRNA	ENST00000647305	ATXN2	chr12:111470742-111479070|chr12:111486824-111488476	ataxin 2 [Source:HGNC Symbol;Acc:HGNC:10555]	GO:0002091(negative regulation of receptor internalization);GO:0003723(RNA binding);GO:0005154(epidermal growth factor receptor binding);GO:0005515(protein binding);GO:0005737(cytoplasm);GO:0005794(Golgi apparatus);GO:0005802(trans-Golgi network);GO:0005829(cytosol);GO:0005844(polysome);GO:0006417(regulation of translation);GO:0008022(protein C-terminus binding);GO:0010494(cytoplasmic stress gran…	NA	NA
hsa_circ_0032725	inf	up	5.41116e-07	0.045056	chr14	75782487	75783530	+	2	circRNA	ENST00000298832	TTLL5	chr14:75779702-75782486|chr14:75783530-75792915	tubulin tyrosine ligase like 5 [Source:HGNC Symbol;Acc:HGNC:19963]	GO:0000166(nucleotide binding);GO:0000226(microtubule cytoskeleton organization);GO:0005524(ATP binding);GO:0005634(nucleus);GO:0005737(cytoplasm);GO:0005813(centrosome);GO:0005829(cytosol);GO:0005856(cytoskeleton);GO:0005874(microtubule);GO:0005886(plasma membrane);GO:0005929(cilium);GO:0006464(cellular protein modification process);GO:0015631(tubulin binding);GO:0016874(ligase activity);GO:0018…	NA	NA
circRNA3122	inf	up	5.39419e-07	0.0450793	chr4	65404374	65420565	-	3	circRNA	ENST00000273854	EPHA5	chr4:65377063-65404373|chr4:65420565-65490376	EPH receptor A5 [Source:HGNC Symbol;Acc:HGNC:3389]	GO:0000166(nucleotide binding);GO:0004672(protein kinase activity);GO:0004713(protein tyrosine kinase activity);GO:0004714(transmembrane receptor protein tyrosine kinase activity);GO:0005003(ephrin receptor activity);GO:0005004(GPI-linked ephrin receptor activity);GO:0005005(transmembrane-ephrin receptor activity);GO:0005515(protein binding);GO:0005524(ATP binding);GO:0005791(rough endoplasmic re…	04360(Axon guidance)	NA
hsa_circ_0007072	-3.19308	down	5.40552e-07	0.0453388	chr15	65702305	65703008	-	2	circRNA	ENST00000443035	DENND4A	chr15:65701890-65702304|chr15:65703008-65706090	DENN domain containing 4A [Source:HGNC Symbol;Acc:HGNC:24321]	GO:0003677(DNA binding);GO:0005085(guanyl-nucleotide exchange factor activity);GO:0005515(protein binding);GO:0005634(nucleus);GO:0005829(cytosol);GO:0006355(regulation of transcription, DNA-templated);GO:0017112(Rab guanyl-nucleotide exchange factor activity)	NA	NA
hsa_circ_0005870	-2.90989	down	5.42708e-07	0.0456852	chr3	47037666	47046621	-	3	circRNA	ENST00000431180	SETD2	chr3:47019840-47037665|chr3:47046621-47056820	SET domain containing 2, histone lysine methyltransferase [Source:HGNC Symbol;Acc:HGNC:18420]	GO:0001525(angiogenesis);GO:0001570(vasculogenesis);GO:0001763(morphogenesis of a branching structure);GO:0001843(neural tube closure);GO:0002376(immune system process);GO:0005515(protein binding);GO:0005634(nucleus);GO:0005654(nucleoplasm);GO:0005694(chromosome);GO:0006281(DNA repair);GO:0006298(mismatch repair);GO:0006325(chromatin organization);GO:0006355(regulation of transcription, DNA-templ…	00310(Lysine degradation)	EC:2.1.1.43
circRNA5518	2.38588	up	5.47291e-07	0.0462378	chr1	51827797	51834170	-	2	circRNA	ENST00000475715	NRDC	chr1:51825382-51827796|chr1:51834170-51836131	nardilysin convertase [Source:HGNC Symbol;Acc:HGNC:7995]	GO:0003824(catalytic activity);GO:0004222(metalloendopeptidase activity);GO:0005515(protein binding);GO:0005739(mitochondrion);GO:0005829(cytosol);GO:0006508(proteolysis);GO:0008233(peptidase activity);GO:0008237(metallopeptidase activity);GO:0009986(cell surface);GO:0016787(hydrolase activity);GO:0046872(metal ion binding);GO:0048408(epidermal growth factor binding);GO:0051044(positive regulatio…	NA	EC:3.4.24.61
hsa_circ_0120536	inf	up	5.49221e-07	0.0465684	chr2	61076920	61103998	+	8	circRNA	ENST00000402291	KIAA1841	chr2:61073551-61076919|chr2:61103998-61106562	KIAA1841 [Source:HGNC Symbol;Acc:HGNC:29387]	NA	NA	NA
hsa_circ_0119868	-inf	down	5.49637e-07	0.0467714	chr2	33263294	33293282	+	6	circRNA	ENST00000404816	LTBP1	chr2:33262821-33263293|chr2:33293282-33300450	latent transforming growth factor beta binding protein 1 [Source:HGNC Symbol;Acc:HGNC:6714]	GO:0001527(microfibril);GO:0003281(ventricular septum development);GO:0005024(transforming growth factor beta-activated receptor activity);GO:0005201(extracellular matrix structural constituent);GO:0005509(calcium ion binding);GO:0005515(protein binding);GO:0005576(extracellular region);GO:0005788(endoplasmic reticulum lumen);GO:0007178(transmembrane receptor protein serine/threonine kinase signa…	04350(TGF-beta signaling pathway)	NA
circRNA9126	2.52858	up	5.48219e-07	0.0468179	chr2	63484605	63492940	-	4	circRNA	ENST00000490935	WDPCP	chr2:63492940-63650659	WD repeat containing planar cell polarity effector [Source:HGNC Symbol;Acc:HGNC:28027]	GO:0001822(kidney development);GO:0002093(auditory receptor cell morphogenesis);GO:0005515(protein binding);GO:0005737(cytoplasm);GO:0005856(cytoskeleton);GO:0005886(plasma membrane);GO:0005929(cilium);GO:0005930(axoneme);GO:0005938(cell cortex);GO:0007224(smoothened signaling pathway);GO:0007399(nervous system development);GO:0010762(regulation of fibroblast migration);GO:0016020(membrane);GO:00…	NA	NA
circRNA26235	-inf	down	5.46753e-07	0.0468594	chr2	26364303	26383347	+	4	circRNA	ENST00000447170	SELENOI	chr2:26346289-26364302|chr2:26383347-26384959	selenoprotein I [Source:HGNC Symbol;Acc:HGNC:29361]	GO:0004307(ethanolaminephosphotransferase activity);GO:0005789(endoplasmic reticulum membrane);GO:0005794(Golgi apparatus);GO:0006629(lipid metabolic process);GO:0006646(phosphatidylethanolamine biosynthetic process);GO:0008654(phospholipid biosynthetic process);GO:0016020(membrane);GO:0016021(integral component of membrane);GO:0016740(transferase activity);GO:0016780(phosphotransferase activity,…	00440(Phosphonate and phosphinate metabolism);00564(Glycerophospholipid metabolism);00565(Ether lipid metabolism)	EC:2.7.8.1
circRNA22067	-inf	down	5.45021e-07	0.0468773	X	2719661	2726373	+	5	circRNA	ENST00000611428	CD99	X:2717652-2719660|X:2726373-2733356	CD99 molecule (Xg blood group) [Source:HGNC Symbol;Acc:HGNC:7082]	GO:0005515(protein binding);GO:0005737(cytoplasm);GO:0005886(plasma membrane);GO:0005887(integral component of plasma membrane);GO:0005925(focal adhesion);GO:0007155(cell adhesion);GO:0016020(membrane);GO:0016021(integral component of membrane);GO:0034109(homotypic cell-cell adhesion);GO:0050776(regulation of immune response);GO:0072683(T cell extravasation);GO:2000391(positive regulation of neut…	04514(Cell adhesion molecules (CAMs));04670(Leukocyte transendothelial migration)	NA
hsa_circ_0055426	2.9317	up	5.43247e-07	0.0468904	chr2	85555484	85556260	-	2	circRNA	ENST00000233838	GGCX	chr2:85554306-85555483|chr2:85556260-85558439	gamma-glutamyl carboxylase [Source:HGNC Symbol;Acc:HGNC:4247]	GO:0005783(endoplasmic reticulum);GO:0005789(endoplasmic reticulum membrane);GO:0006464(cellular protein modification process);GO:0007596(blood coagulation);GO:0008488(gamma-glutamyl carboxylase activity);GO:0016020(membrane);GO:0016021(integral component of membrane);GO:0016829(lyase activity);GO:0017187(peptidyl-glutamic acid carboxylation);GO:0019842(vitamin binding)	00130(Ubiquinone and other terpenoid-quinone biosynthesis)	EC:4.1.1.90
hsa_circ_0021570	1.46456	up	5.43136e-07	0.0470464	chr11	32927157	32935435	+	3	circRNA	ENST00000650167	QSER1	chr11:32893334-32927156|chr11:32935435-32953856	glutamine and serine rich 1 [Source:HGNC Symbol;Acc:HGNC:26154]	NA	NA	NA
hsa_circ_0001246	-2.2011	down	5.41536e-07	0.047073	chr22	45700282	45740538	+	6	circRNA	ENST00000381061	ATXN10	chr22:45693078-45700281|chr22:45740538-45806958	ataxin 10 [Source:HGNC Symbol;Acc:HGNC:10549]	GO:0005515(protein binding);GO:0005615(extracellular space);GO:0005737(cytoplasm);GO:0005829(cytosol);GO:0005886(plasma membrane);GO:0007399(nervous system development);GO:0016020(membrane);GO:0019899(enzyme binding);GO:0030425(dendrite);GO:0031175(neuron projection development);GO:0042802(identical protein binding);GO:0043025(neuronal cell body);GO:0048471(perinuclear region of cytoplasm);GO:006…	NA	NA
circRNA10412	inf	up	5.40145e-07	0.0471169	chr15	64409613	64425631	+	5	circRNA	ENST00000261884	TRIP4	chr15:64406459-64409612|chr15:64425631-64445005	thyroid hormone receptor interactor 4 [Source:HGNC Symbol;Acc:HGNC:12310]	GO:0002020(protease binding);GO:0003713(transcription coactivator activity);GO:0005515(protein binding);GO:0005634(nucleus);GO:0005654(nucleoplasm);GO:0005737(cytoplasm);GO:0005813(centrosome);GO:0005815(microtubule organizing center);GO:0005829(cytosol);GO:0005856(cytoskeleton);GO:0006355(regulation of transcription, DNA-templated);GO:0008270(zinc ion binding);GO:0016604(nuclear body);GO:0016922…	NA	NA
circRNA23472	-inf	down	5.41411e-07	0.0473924	chr10	20859714	20899450	-	8	circRNA	ENST00000675747	NEBL	chr10:20858344-20859713|chr10:20899450-20945338	nebulette [Source:HGNC Symbol;Acc:HGNC:16932]	GO:0001725(stress fiber);GO:0003779(actin binding);GO:0005515(protein binding);GO:0005523(tropomyosin binding);GO:0005737(cytoplasm);GO:0008092(cytoskeletal protein binding);GO:0008307(structural constituent of muscle);GO:0030018(Z disc);GO:0031005(filamin binding);GO:0031674(I band);GO:0048747(muscle fiber development);GO:0051015(actin filament binding);GO:0070062(extracellular exosome);GO:00716…	NA	NA
hsa_circ_0054214	2.44858	up	5.39839e-07	0.0474195	chr2	39336920	39337581	-	2	circRNA	ENST00000263881	MAP4K3	chr2:39333574-39336919|chr2:39337581-39343387	mitogen-activated protein kinase kinase kinase kinase 3 [Source:HGNC Symbol;Acc:HGNC:6865]	GO:0000165(MAPK cascade);GO:0000166(nucleotide binding);GO:0000185(activation of MAPKKK activity);GO:0004672(protein kinase activity);GO:0004674(protein serine/threonine kinase activity);GO:0005515(protein binding);GO:0005524(ATP binding);GO:0006468(protein phosphorylation);GO:0007254(JNK cascade);GO:0008349(MAP kinase kinase kinase kinase activity);GO:0009411(response to UV);GO:0016301(kinase ac…	04010(MAPK signaling pathway)	NA
ciRNA20	2.7651	up	5.38328e-07	0.047451	chr11	8621344	8621644	-	1	ciRNA	ENST00000299550	TRIM66	chr11:8621321-8621644	tripartite motif containing 66 [Source:HGNC Symbol;Acc:HGNC:29005]	GO:0003682(chromatin binding);GO:0005515(protein binding);GO:0005634(nucleus);GO:0005654(nucleoplasm);GO:0008270(zinc ion binding);GO:0016235(aggresome);GO:0045892(negative regulation of transcription, DNA-templated);GO:0046872(metal ion binding)	NA	NA
ciRNA131	inf	up	5.37073e-07	0.0475041	chr7	891067	892254	+	1	ciRNA	ENST00000457861	SUN1	chr7:891066-892277	Sad1 and UNC84 domain containing 1 [Source:HGNC Symbol;Acc:HGNC:18587]	GO:0001503(ossification);GO:0005515(protein binding);GO:0005521(lamin binding);GO:0005634(nucleus);GO:0005635(nuclear envelope);GO:0005637(nuclear inner membrane);GO:0005639(integral component of nuclear inner membrane);GO:0005737(cytoplasm);GO:0006998(nuclear envelope organization);GO:0007129(synapsis);GO:0007283(spermatogenesis);GO:0009612(response to mechanical stimulus);GO:0016020(membrane);G…	NA	NA
circRNA29585	-inf	down	5.44733e-07	0.0483478	chr3	100555210	100568967	+	4	circRNA	ENST00000403410	TMEM45A	chr3:100519608-100555209|chr3:100568967-100576925	transmembrane protein 45A [Source:HGNC Symbol;Acc:HGNC:25480]	GO:0005515(protein binding);GO:0016020(membrane);GO:0016021(integral component of membrane)	NA	NA
hsa_circ_0130072	-inf	down	5.44214e-07	0.0484677	chr5	95736889	95755761	+	4	circRNA	ENST00000379982	RHOBTB3	chr5:95732084-95736888|chr5:95755761-95763507	Rho related BTB domain containing 3 [Source:HGNC Symbol;Acc:HGNC:18757]	GO:0000166(nucleotide binding);GO:0003924(GTPase activity);GO:0005515(protein binding);GO:0005524(ATP binding);GO:0005525(GTP binding);GO:0005737(cytoplasm);GO:0005794(Golgi apparatus);GO:0005829(cytosol);GO:0005856(cytoskeleton);GO:0005886(plasma membrane);GO:0005938(cell cortex);GO:0007015(actin filament organization);GO:0008360(regulation of cell shape);GO:0008584(male gonad development);GO:00…	NA	NA
hsa_circ_0096776	inf	up	5.42778e-07	0.0485053	chr11	93696320	93702919	+	4	circRNA	ENST00000325212	CEP295	chr11:93695634-93696319|chr11:93702919-93706744	centrosomal protein 295 [Source:HGNC Symbol;Acc:HGNC:29366]	GO:0005737(cytoplasm);GO:0005813(centrosome);GO:0005814(centriole);GO:0005815(microtubule organizing center);GO:0005819(spindle);GO:0005829(cytosol);GO:0005856(cytoskeleton);GO:0005886(plasma membrane);GO:0008017(microtubule binding);GO:0010825(positive regulation of centrosome duplication);GO:0046599(regulation of centriole replication);GO:1901985(positive regulation of protein acetylation);GO:1…	NA	NA
hsa_circ_0100479	2.96427	up	5.41019e-07	0.0485132	chr13	41466823	41468838	+	2	circRNA	ENST00000379359	RGCC	chr13:41458470-41466822|chr13:41468838-41470477	regulator of cell cycle [Source:HGNC Symbol;Acc:HGNC:20369]	GO:0001100(negative regulation of exit from mitosis);GO:0001937(negative regulation of endothelial cell proliferation);GO:0003331(positive regulation of extracellular matrix constituent secretion);GO:0005515(protein binding);GO:0005634(nucleus);GO:0005654(nucleoplasm);GO:0005730(nucleolus);GO:0005737(cytoplasm);GO:0005813(centrosome);GO:0005815(microtubule organizing center);GO:0005829(cytosol);G…	NA	NA
circRNA23599	-inf	down	5.43963e-07	0.0489431	chr2	58198580	58232112	-	6	circRNA	ENST00000402135	FANCL	chr2:58165874-58198579|chr2:58232112-58241218	FA complementation group L [Source:HGNC Symbol;Acc:HGNC:20748]	GO:0004842(ubiquitin-protein transferase activity);GO:0005515(protein binding);GO:0005634(nucleus);GO:0005635(nuclear envelope);GO:0005654(nucleoplasm);GO:0005737(cytoplasm);GO:0006281(DNA repair);GO:0006513(protein monoubiquitination);GO:0006974(cellular response to DNA damage stimulus);GO:0007276(gamete generation);GO:0016567(protein ubiquitination);GO:0016604(nuclear body);GO:0016740(transfera…	03460(Fanconi anemia pathway);04120(Ubiquitin mediated proteolysis)	EC:2.3.2.27
hsa_circ_0069760	-inf	down	5.43394e-07	0.0490576	chr4	54280316	54290554	+	7	circRNA	ENST00000507166	AC058822	chr4:54278515-54280315|chr4:54290554-54295124	novel FIP1L1-PDGFRA fusion protein	GO:0004672(protein kinase activity);GO:0004713(protein tyrosine kinase activity);GO:0004714(transmembrane receptor protein tyrosine kinase activity);GO:0005524(ATP binding);GO:0005634(nucleus);GO:0005654(nucleoplasm);GO:0006468(protein phosphorylation);GO:0007169(transmembrane receptor protein tyrosine kinase signaling pathway);GO:0018108(peptidyl-tyrosine phosphorylation)	NA	NA
circRNA5082	inf	up	5.42353e-07	0.049129	chr18	79410404	79411501	+	1	circRNA	ENST00000586434	NFATC1	chr18:79400479-79410403|chr18:79411501-79433579	nuclear factor of activated T cells 1 [Source:HGNC Symbol;Acc:HGNC:7775]	GO:0000790(nuclear chromatin);GO:0000977(RNA polymerase II regulatory region sequence-specific DNA binding);GO:0000978(RNA polymerase II cis-regulatory region sequence-specific DNA binding);GO:0000981(DNA-binding transcription factor activity, RNA polymerase II-specific);GO:0001085(RNA polymerase II transcription factor binding);GO:0001225(RNA polymerase II transcription coactivator binding);GO:0…	04010(MAPK signaling pathway);04022(cGMP-PKG signaling pathway);04024(cAMP signaling pathway);04218(Cellular senescence);04310(Wnt signaling pathway);04380(Osteoclast differentiation);04625(C-type lectin receptor signaling pathway);04650(Natural killer cell mediated cytotoxicity);04658(Th1 and Th2 cell differentiation);04659(Th17 cell differentiation);04660(T cell receptor signaling pathway);0466…	NA
circRNA9130	inf	up	5.42483e-07	0.0493063	chr18	79096477	79176907	+	7	circRNA	ENST00000307671	ATP9B	chr18:79069529-79096476|chr18:79176907-79193183	ATPase phospholipid transporting 9B (putative) [Source:HGNC Symbol;Acc:HGNC:13541]	GO:0000166(nucleotide binding);GO:0000287(magnesium ion binding);GO:0005524(ATP binding);GO:0005768(endosome);GO:0005794(Golgi apparatus);GO:0005802(trans-Golgi network);GO:0005886(plasma membrane);GO:0006890(retrograde vesicle-mediated transport, Golgi to endoplasmic reticulum);GO:0006897(endocytosis);GO:0015914(phospholipid transport);GO:0016020(membrane);GO:0016021(integral component of membra…	NA	EC:7.6.2.1
hsa_circ_0112218	inf	up	5.4121e-07	0.0493556	chr1	225185291	225207220	+	5	circRNA	ENST00000445597	DNAH14	chr1:225168028-225185290|chr1:225207220-225231072	dynein axonemal heavy chain 14 [Source:HGNC Symbol;Acc:HGNC:2945]	GO:0000166(nucleotide binding);GO:0003774(motor activity);GO:0003777(microtubule motor activity);GO:0005524(ATP binding);GO:0005737(cytoplasm);GO:0005856(cytoskeleton);GO:0005874(microtubule);GO:0005929(cilium);GO:0007018(microtubule-based movement);GO:0008569(ATP-dependent microtubule motor activity, minus-end-directed);GO:0030286(dynein complex);GO:0042995(cell projection);GO:0045505(dynein int…	05016(Huntington disease)	NA
hsa_circ_0015803	-inf	down	5.40583e-07	0.0494634	chr1	198232553	198297240	+	8	circRNA	ENST00000538004	NEK7	chr1:198157096-198232552|chr1:198297240-198319411	NIMA related kinase 7 [Source:HGNC Symbol;Acc:HGNC:13386]	GO:0000166(nucleotide binding);GO:0000922(spindle pole);GO:0004672(protein kinase activity);GO:0004674(protein serine/threonine kinase activity);GO:0005515(protein binding);GO:0005524(ATP binding);GO:0005634(nucleus);GO:0005654(nucleoplasm);GO:0005737(cytoplasm);GO:0005815(microtubule organizing center);GO:0005856(cytoskeleton);GO:0005874(microtubule);GO:0006468(protein phosphorylation);GO:000734…	04621(NOD-like receptor signaling pathway)	EC:2.7.11.1
circRNA2842	2.70057	up	5.39238e-07	0.0495047	chr5	65188016	65291470	-	12	circRNA	ENST00000381055	ADAMTS6	chr5:65173008-65188015|chr5:65291470-65299984	ADAM metallopeptidase with thrombospondin type 1 motif 6 [Source:HGNC Symbol;Acc:HGNC:222]	GO:0001822(kidney development);GO:0003279(cardiac septum development);GO:0004222(metalloendopeptidase activity);GO:0005576(extracellular region);GO:0006508(proteolysis);GO:0007507(heart development);GO:0008233(peptidase activity);GO:0008237(metallopeptidase activity);GO:0016787(hydrolase activity);GO:0030198(extracellular matrix organization);GO:0031012(extracellular matrix);GO:0035904(aorta deve…	NA	NA
circRNA8872	inf	up	5.37563e-07	0.0495149	chr9	120437295	120471878	-	7	circRNA	ENST00000360822	CDK5RAP2	chr9:120422741-120437294|chr9:120471878-120477349	CDK5 regulatory subunit associated protein 2 [Source:HGNC Symbol;Acc:HGNC:18672]	GO:0000086(G2/M transition of mitotic cell cycle);GO:0000132(establishment of mitotic spindle orientation);GO:0000226(microtubule cytoskeleton organization);GO:0000242(pericentriolar material);GO:0000922(spindle pole);GO:0000976(transcription regulatory region sequence-specific DNA binding);GO:0001578(microtubule bundle formation);GO:0005515(protein binding);GO:0005516(calmodulin binding);GO:0005…	NA	NA
hsa_circ_0057276	-4.74291	down	5.39223e-07	0.0498323	chr2	182962159	182967361	-	3	circRNA	ENST00000361354	NCKAP1	chr2:182957596-182962158|chr2:182967361-182976892	NCK associated protein 1 [Source:HGNC Symbol;Acc:HGNC:7666]	GO:0000902(cell morphogenesis);GO:0001726(ruffle);GO:0005515(protein binding);GO:0005829(cytosol);GO:0005886(plasma membrane);GO:0005925(focal adhesion);GO:0006915(apoptotic process);GO:0007417(central nervous system development);GO:0010592(positive regulation of lamellipodium assembly);GO:0016020(membrane);GO:0016021(integral component of membrane);GO:0016032(viral process);GO:0016477(cell migra…	04810(Regulation of actin cytoskeleton)	NA
circRNA9192	inf	up	5.38347e-07	0.0499155	chr2	69363546	69374113	-	3	circRNA	ENST00000674507	GFPT1	chr2:69359326-69363545|chr2:69374113-69387065	glutamine--fructose-6-phosphate transaminase 1 [Source:HGNC Symbol;Acc:HGNC:4241]	GO:0004360(glutamine-fructose-6-phosphate transaminase (isomerizing) activity);GO:0005829(cytosol);GO:0006002(fructose 6-phosphate metabolic process);GO:0006047(UDP-N-acetylglucosamine metabolic process);GO:0006048(UDP-N-acetylglucosamine biosynthetic process);GO:0006112(energy reserve metabolic process);GO:0006487(protein N-linked glycosylation);GO:0006541(glutamine metabolic process);GO:0008483…	00250(Alanine, aspartate and glutamate metabolism);00520(Amino sugar and nucleotide sugar metabolism);04931(Insulin resistance)	NA
circRNA31476	-inf	down	5.36958e-07	0.0499506	chr4	120710310	120811449	-	9	circRNA	ENST00000505484	PRDM5	chr4:120695275-120710309|chr4:120811449-120816453	PR/SET domain 5 [Source:HGNC Symbol;Acc:HGNC:9349]	GO:0000122(negative regulation of transcription by RNA polymerase II);GO:0000278(mitotic cell cycle);GO:0000976(transcription regulatory region sequence-specific DNA binding);GO:0000977(RNA polymerase II regulatory region sequence-specific DNA binding);GO:0000978(RNA polymerase II cis-regulatory region sequence-specific DNA binding);GO:0000981(DNA-binding transcription factor activity, RNA polyme…	NA	NA
