# Supplementary material for: Whole-Transcriptome Sequencing of Knee Joint Cartilage from Kashin–Beck Disease and Osteoarthritis Patients
Source: Int J Mol Sci. 2024 Apr 15;25(8):4348. doi: 10.3390/ijms25084348 (PMC11049856; doi:10.3390/ijms25084348)
Supplement: Supplementary file 1 [file ijms-25-04348-s001.zip › Supplementary Table S8_KBDVSOA_GO_enrichment_Gene.xlsx]

## Sheet: Sheet1
Supplementary Table S8. GO enrichment analysis results of differentially expressed circRNA between KBD and OA
GO_ID	GO_Term	GO_function	GO_class	Genes	S gene number	TS gene number	B gene number	TB gene number	pvalue
GO:0050776	regulation of immune response	biological_process	6	circRNA12487(COL2A1);circRNA14123(COL1A1);circRNA14135(COL1A1);circRNA14138(COL1A1);circRNA14144(COL1A1);circRNA14146(COL1A1);circRNA14148(COL1A1);circRNA14149(COL1A1);circRNA14150(COL1A1);circRNA14300(COL2A1);circRNA14404(COL3A1);circRNA16537(COL1A1);circRNA16767(COL2A1);circRNA16824(COL1A2);circRNA17683(COL1A1);circRNA22067(CD99);circRNA27986(DENND1B);circRNA5727(COL2A1);circRNA5743(COL2A1);cir…	8	221	38	7393	1.26655e-05
GO:0031012	extracellular matrix	cellular_component	4	circRNA12218(ACAN);circRNA12487(COL2A1);circRNA14123(COL1A1);circRNA14135(COL1A1);circRNA14138(COL1A1);circRNA14144(COL1A1);circRNA14146(COL1A1);circRNA14148(COL1A1);circRNA14149(COL1A1);circRNA14150(COL1A1);circRNA14300(COL2A1);circRNA14404(COL3A1);circRNA16537(COL1A1);circRNA16767(COL2A1);circRNA16824(COL1A2);circRNA17683(COL1A1);circRNA2842(ADAMTS6);circRNA2845(ADAMTS6);circRNA5041(FN1);circRN…	14	221	124	7393	1.78047e-05
GO:0048729	tissue morphogenesis	biological_process	5	circRNA9400(GCNT1);hsa_circ_0006952(SMAD4);hsa_circ_0068681(DLG1)	3	221	3	7393	2.63617e-05
GO:0048407	platelet-derived growth factor binding	molecular_function	6	circRNA12487(COL2A1);circRNA14123(COL1A1);circRNA14135(COL1A1);circRNA14138(COL1A1);circRNA14144(COL1A1);circRNA14146(COL1A1);circRNA14148(COL1A1);circRNA14149(COL1A1);circRNA14150(COL1A1);circRNA14300(COL2A1);circRNA14404(COL3A1);circRNA16537(COL1A1);circRNA16767(COL2A1);circRNA16824(COL1A2);circRNA17683(COL1A1);circRNA5727(COL2A1);circRNA5743(COL2A1);circRNA5747(COL2A1);circRNA5752(COL2A1);circ…	4	221	9	7393	8.70208e-05
GO:0007229	integrin-mediated signaling pathway	biological_process	6	circRNA14404(COL3A1);circRNA16794(PTK2);circRNA5041(FN1);circRNA5963(CCN2);circRNA9693(CCN2);hsa_circ_0005576(CDC42);hsa_circ_0005649(ERBIN);hsa_circ_0110303(VAV3);hsa_circ_0131958(DST)	8	221	52	7393	0.00013592
GO:0001502	cartilage condensation	biological_process	4	circRNA12218(ACAN);circRNA12487(COL2A1);circRNA14300(COL2A1);circRNA16767(COL2A1);circRNA5188(ACAN);circRNA5727(COL2A1);circRNA5743(COL2A1);circRNA5747(COL2A1);circRNA5752(COL2A1);circRNA5963(CCN2);circRNA9520(COL2A1);circRNA9693(CCN2);circRNA9717(SOX5);hsa_circ_0098192(SOX5)	4	221	10	7393	0.000141643
GO:0062023	collagen-containing extracellular matrix	cellular_component	5	circRNA12218(ACAN);circRNA12487(COL2A1);circRNA14123(COL1A1);circRNA14135(COL1A1);circRNA14138(COL1A1);circRNA14144(COL1A1);circRNA14146(COL1A1);circRNA14148(COL1A1);circRNA14149(COL1A1);circRNA14150(COL1A1);circRNA14300(COL2A1);circRNA14404(COL3A1);circRNA16537(COL1A1);circRNA16767(COL2A1);circRNA16824(COL1A2);circRNA17683(COL1A1);circRNA26501(PSAP);circRNA5041(FN1);circRNA5188(ACAN);circRNA5660…	15	221	172	7393	0.000183474
GO:0005201	extracellular matrix structural constituent	molecular_function	4	circRNA12218(ACAN);circRNA12487(COL2A1);circRNA14123(COL1A1);circRNA14135(COL1A1);circRNA14138(COL1A1);circRNA14144(COL1A1);circRNA14146(COL1A1);circRNA14148(COL1A1);circRNA14149(COL1A1);circRNA14150(COL1A1);circRNA14300(COL2A1);circRNA14404(COL3A1);circRNA16537(COL1A1);circRNA16767(COL2A1);circRNA16824(COL1A2);circRNA17683(COL1A1);circRNA5041(FN1);circRNA5188(ACAN);circRNA5713(BGN);circRNA5727(C…	9	221	78	7393	0.000491752
GO:0045503	dynein light chain binding	molecular_function	5	circRNA24008(DYNC1I1);hsa_circ_0012906(WDR78);hsa_circ_0133850(WDR60);hsa_circ_0135154(DYNC1I1)	3	221	6	7393	0.000493055
GO:0010718	positive regulation of epithelial to mesenchymal transition	biological_process	8	circRNA14123(COL1A1);circRNA14135(COL1A1);circRNA14138(COL1A1);circRNA14144(COL1A1);circRNA14146(COL1A1);circRNA14148(COL1A1);circRNA14149(COL1A1);circRNA14150(COL1A1);circRNA16537(COL1A1);circRNA17683(COL1A1);circRNA9232(COL1A1);circRNA9233(COL1A1);circRNA9238(COL1A1);hsa_circ_0002837(TGFB1);hsa_circ_0006952(SMAD4);hsa_circ_0045350(AXIN2);hsa_circ_0100479(RGCC)	5	221	24	7393	0.000609131
GO:0030198	extracellular matrix organization	biological_process	6	circRNA12218(ACAN);circRNA12487(COL2A1);circRNA14123(COL1A1);circRNA14135(COL1A1);circRNA14138(COL1A1);circRNA14144(COL1A1);circRNA14146(COL1A1);circRNA14148(COL1A1);circRNA14149(COL1A1);circRNA14150(COL1A1);circRNA14300(COL2A1);circRNA14404(COL3A1);circRNA16537(COL1A1);circRNA16767(COL2A1);circRNA16794(PTK2);circRNA16824(COL1A2);circRNA17683(COL1A1);circRNA2842(ADAMTS6);circRNA2845(ADAMTS6);circ…	12	221	135	7393	0.000683039
GO:0001957	intramembranous ossification	biological_process	6	circRNA14123(COL1A1);circRNA14135(COL1A1);circRNA14138(COL1A1);circRNA14144(COL1A1);circRNA14146(COL1A1);circRNA14148(COL1A1);circRNA14149(COL1A1);circRNA14150(COL1A1);circRNA16537(COL1A1);circRNA17683(COL1A1);circRNA9232(COL1A1);circRNA9233(COL1A1);circRNA9238(COL1A1);hsa_circ_0045350(AXIN2)	2	221	2	7393	0.000889677
GO:0005584	collagen type I trimer	cellular_component	6	circRNA14123(COL1A1);circRNA14135(COL1A1);circRNA14138(COL1A1);circRNA14144(COL1A1);circRNA14146(COL1A1);circRNA14148(COL1A1);circRNA14149(COL1A1);circRNA14150(COL1A1);circRNA16537(COL1A1);circRNA16824(COL1A2);circRNA17683(COL1A1);circRNA5862(COL1A2);circRNA5863(COL1A2);circRNA9232(COL1A1);circRNA9233(COL1A1);circRNA9238(COL1A1);circRNA9609(COL1A2);circRNA9611(COL1A2);circRNA9614(COL1A2);circRNA9…	2	221	2	7393	0.000889677
GO:0003413	chondrocyte differentiation involved in endochondral bone morphogenesis	biological_process	7	circRNA23615(TRIP11);hsa_circ_0045350(AXIN2)	2	221	2	7393	0.000889677
GO:0051216	cartilage development	biological_process	6	circRNA12487(COL2A1);circRNA14300(COL2A1);circRNA14322(SMAD5);circRNA16767(COL2A1);circRNA23615(TRIP11);circRNA4007(SATB2);circRNA5727(COL2A1);circRNA5743(COL2A1);circRNA5747(COL2A1);circRNA5752(COL2A1);circRNA9520(COL2A1);circRNA9717(SOX5);hsa_circ_0069064(EVC);hsa_circ_0098192(SOX5)	6	221	40	7393	0.00109263
GO:0005604	basement membrane	cellular_component	6	circRNA12218(ACAN);circRNA12487(COL2A1);circRNA14300(COL2A1);circRNA16767(COL2A1);circRNA5041(FN1);circRNA5188(ACAN);circRNA5727(COL2A1);circRNA5743(COL2A1);circRNA5747(COL2A1);circRNA5752(COL2A1);circRNA5998(SMOC2);circRNA9520(COL2A1);hsa_circ_0005649(ERBIN);hsa_circ_0068681(DLG1);hsa_circ_0131958(DST)	7	221	55	7393	0.00116079
GO:0002020	protease binding	molecular_function	6	circRNA10412(TRIP4);circRNA14123(COL1A1);circRNA14135(COL1A1);circRNA14138(COL1A1);circRNA14144(COL1A1);circRNA14146(COL1A1);circRNA14148(COL1A1);circRNA14149(COL1A1);circRNA14150(COL1A1);circRNA14404(COL3A1);circRNA16537(COL1A1);circRNA16824(COL1A2);circRNA17683(COL1A1);circRNA26501(PSAP);circRNA5041(FN1);circRNA5862(COL1A2);circRNA5863(COL1A2);circRNA5959(CFLAR);circRNA9232(COL1A1);circRNA9233(…	7	221	56	7393	0.00129355
GO:0045504	dynein heavy chain binding	molecular_function	5	circRNA24008(DYNC1I1);hsa_circ_0012906(WDR78);hsa_circ_0133850(WDR60);hsa_circ_0135154(DYNC1I1)	3	221	8	7393	0.00132044
GO:0009314	response to radiation	biological_process	5	circRNA14404(COL3A1);hsa_circ_0002837(TGFB1);hsa_circ_0004662(SOD2);hsa_circ_0008027(OGG1)	4	221	17	7393	0.00136106
GO:0042060	wound healing	biological_process	6	circRNA14123(COL1A1);circRNA14135(COL1A1);circRNA14138(COL1A1);circRNA14144(COL1A1);circRNA14146(COL1A1);circRNA14148(COL1A1);circRNA14149(COL1A1);circRNA14150(COL1A1);circRNA14404(COL3A1);circRNA16537(COL1A1);circRNA17683(COL1A1);circRNA5041(FN1);circRNA5822(FUT10);circRNA5959(CFLAR);circRNA9232(COL1A1);circRNA9233(COL1A1);circRNA9238(COL1A1);hsa_circ_0002837(TGFB1);hsa_circ_0131958(DST)	7	221	57	7393	0.00143789
GO:0032967	positive regulation of collagen biosynthetic process	biological_process	8	circRNA5963(CCN2);circRNA9693(CCN2);hsa_circ_0002837(TGFB1);hsa_circ_0100479(RGCC)	3	221	9	7393	0.00193714
GO:0071560	cellular response to transforming growth factor beta stimulus	biological_process	8	circRNA14123(COL1A1);circRNA14135(COL1A1);circRNA14138(COL1A1);circRNA14144(COL1A1);circRNA14146(COL1A1);circRNA14148(COL1A1);circRNA14149(COL1A1);circRNA14150(COL1A1);circRNA16537(COL1A1);circRNA16794(PTK2);circRNA17683(COL1A1);circRNA5676(EPB41L5);circRNA9232(COL1A1);circRNA9233(COL1A1);circRNA9238(COL1A1);circRNA9717(SOX5);hsa_circ_0002837(TGFB1);hsa_circ_0098192(SOX5)	5	221	31	7393	0.00205394
GO:0007179	transforming growth factor beta receptor signaling pathway	biological_process	8	circRNA14322(SMAD5);circRNA14404(COL3A1);circRNA16794(PTK2);circRNA16824(COL1A2);circRNA5862(COL1A2);circRNA5863(COL1A2);circRNA9609(COL1A2);circRNA9611(COL1A2);circRNA9614(COL1A2);circRNA9617(COL1A2);hsa_circ_0002837(TGFB1);hsa_circ_0006952(SMAD4);hsa_circ_0018168(PARD3)	7	221	61	7393	0.00214511
GO:0001501	skeletal system development	biological_process	6	circRNA12218(ACAN);circRNA12487(COL2A1);circRNA14123(COL1A1);circRNA14135(COL1A1);circRNA14138(COL1A1);circRNA14144(COL1A1);circRNA14146(COL1A1);circRNA14148(COL1A1);circRNA14149(COL1A1);circRNA14150(COL1A1);circRNA14300(COL2A1);circRNA14404(COL3A1);circRNA16537(COL1A1);circRNA16767(COL2A1);circRNA16824(COL1A2);circRNA17683(COL1A1);circRNA5188(ACAN);circRNA5660(VCAN);circRNA5727(COL2A1);circRNA57…	7	221	62	7393	0.00235799
GO:0007163	establishment or maintenance of cell polarity	biological_process	4	circRNA23886(CDC42BPB);hsa_circ_0005576(CDC42);hsa_circ_0018168(PARD3);hsa_circ_0068681(DLG1)	4	221	20	7393	0.00258241
GO:0032655	regulation of interleukin-12 production	biological_process	7	circRNA3422(FOXP1);ciRNA902(HLA-B);hsa_circ_0008234(FOXP1)	2	221	3	7393	0.00261631
GO:0032525	somite rostral/caudal axis specification	biological_process	7	circRNA5676(EPB41L5);hsa_circ_0006952(SMAD4)	2	221	3	7393	0.00261631
GO:1905146	lysosomal protein catabolic process	biological_process	10	circRNA26501(PSAP);hsa_circ_0087243(VPS13A)	2	221	3	7393	0.00261631
GO:0061448	connective tissue development	biological_process	6	circRNA5963(CCN2);circRNA9693(CCN2);hsa_circ_0002837(TGFB1)	2	221	3	7393	0.00261631
GO:0016476	regulation of embryonic cell shape	biological_process	9	circRNA9126(WDPCP);hsa_circ_0007387(WDPCP);hsa_circ_0079860(SEPTIN7)	2	221	3	7393	0.00261631
GO:0050777	negative regulation of immune response	biological_process	7	circRNA14404(COL3A1);hsa_circ_0002837(TGFB1)	2	221	3	7393	0.00261631
GO:0001763	morphogenesis of a branching structure	biological_process	5	hsa_circ_0002837(TGFB1);hsa_circ_0005870(SETD2)	2	221	3	7393	0.00261631
GO:0010172	embryonic body morphogenesis	biological_process	6	circRNA12230(IFT122);hsa_circ_0095312(CDON)	2	221	3	7393	0.00261631
GO:0004177	aminopeptidase activity	molecular_function	8	circRNA23960(TPP2);ciRNA2777(LVRN);hsa_circ_0002191(AOPEP);hsa_circ_0116601(XPNPEP3)	4	221	21	7393	0.00311621
GO:0030199	collagen fibril organization	biological_process	7	circRNA12218(ACAN);circRNA12487(COL2A1);circRNA14123(COL1A1);circRNA14135(COL1A1);circRNA14138(COL1A1);circRNA14144(COL1A1);circRNA14146(COL1A1);circRNA14148(COL1A1);circRNA14149(COL1A1);circRNA14150(COL1A1);circRNA14300(COL2A1);circRNA14404(COL3A1);circRNA16537(COL1A1);circRNA16767(COL2A1);circRNA16824(COL1A2);circRNA17683(COL1A1);circRNA5188(ACAN);circRNA5727(COL2A1);circRNA5743(COL2A1);circRNA…	5	221	35	7393	0.00356195
GO:0001503	ossification	biological_process	4	circRNA12487(COL2A1);circRNA14123(COL1A1);circRNA14135(COL1A1);circRNA14138(COL1A1);circRNA14144(COL1A1);circRNA14146(COL1A1);circRNA14148(COL1A1);circRNA14149(COL1A1);circRNA14150(COL1A1);circRNA14300(COL2A1);circRNA14322(SMAD5);circRNA16537(COL1A1);circRNA16767(COL2A1);circRNA17683(COL1A1);circRNA5727(COL2A1);circRNA5743(COL2A1);circRNA5747(COL2A1);circRNA5752(COL2A1);circRNA5963(CCN2);circRNA9…	6	221	51	7393	0.00390288
GO:0019882	antigen processing and presentation	biological_process	4	circRNA23765(RAB6A);circRNA26501(PSAP);ciRNA902(HLA-B)	3	221	12	7393	0.00474734
GO:0030021	extracellular matrix structural constituent conferring compression resistance	molecular_function	5	circRNA12218(ACAN);circRNA5188(ACAN);circRNA5660(VCAN);circRNA5713(BGN);hsa_circ_0073237(VCAN)	3	221	12	7393	0.00474734
GO:0009880	embryonic pattern specification	biological_process	5	circRNA14322(SMAD5);circRNA4007(SATB2);ciRNA2771(PGAP1)	3	221	12	7393	0.00474734
GO:0045197	establishment or maintenance of epithelial cell apical/basal polarity	biological_process	7	hsa_circ_0005649(ERBIN);hsa_circ_0018168(PARD3);hsa_circ_0068681(DLG1)	3	221	12	7393	0.00474734
GO:0060059	embryonic retina morphogenesis in camera-type eye	biological_process	6	hsa_circ_0013617(HIPK1);hsa_circ_0095312(CDON)	2	221	4	7393	0.0051295
GO:0051098	regulation of binding	biological_process	5	hsa_circ_0002837(TGFB1);hsa_circ_0006952(SMAD4)	2	221	4	7393	0.0051295
GO:0060351	cartilage development involved in endochondral bone morphogenesis	biological_process	7	circRNA12487(COL2A1);circRNA14123(COL1A1);circRNA14135(COL1A1);circRNA14138(COL1A1);circRNA14144(COL1A1);circRNA14146(COL1A1);circRNA14148(COL1A1);circRNA14149(COL1A1);circRNA14150(COL1A1);circRNA14300(COL2A1);circRNA16537(COL1A1);circRNA16767(COL2A1);circRNA17683(COL1A1);circRNA5727(COL2A1);circRNA5743(COL2A1);circRNA5747(COL2A1);circRNA5752(COL2A1);circRNA9232(COL1A1);circRNA9233(COL1A1);circRN…	2	221	4	7393	0.0051295
GO:0003360	brainstem development	biological_process	5	hsa_circ_0006952(SMAD4);hsa_circ_0089842(NLGN4X)	2	221	4	7393	0.0051295
GO:0030056	hemidesmosome	cellular_component	5	hsa_circ_0005649(ERBIN);hsa_circ_0131958(DST)	2	221	4	7393	0.0051295
GO:0005813	centrosome	cellular_component	7	circRNA10412(TRIP4);circRNA26193(USP33);circRNA28208(CEP70);circRNA8872(CDK5RAP2);hsa_circ_0005576(CDC42);hsa_circ_0006952(SMAD4);hsa_circ_0008433(PDE4B);hsa_circ_0013387(GPSM2);hsa_circ_0013617(HIPK1);hsa_circ_0015491(CEP350);hsa_circ_0032725(TTLL5);hsa_circ_0045350(AXIN2);hsa_circ_0047003(CEP192);hsa_circ_0067347(NEK11);hsa_circ_0096776(CEP295);hsa_circ_0100479(RGCC);hsa_circ_0111889(PPP2R5A);h…	18	221	310	7393	0.00519955
GO:0017112	Rab guanyl-nucleotide exchange factor activity	molecular_function	9	circRNA27986(DENND1B);circRNA29536(RIN2);hsa_circ_0007072(DENND4A);hsa_circ_0098362(DENND5B)	4	221	25	7393	0.005999
GO:0007492	endoderm development	biological_process	6	circRNA5676(EPB41L5);hsa_circ_0002837(TGFB1);hsa_circ_0006952(SMAD4)	3	221	13	7393	0.00603676
GO:0010592	positive regulation of lamellipodium assembly	biological_process	11	circRNA2300(AUTS2);ciRNA1534(AUTS2);hsa_circ_0005576(CDC42);hsa_circ_0057276(NCKAP1)	3	221	13	7393	0.00603676
GO:0030031	cell projection assembly	biological_process	6	hsa_circ_0005576(CDC42);hsa_circ_0057276(NCKAP1);hsa_circ_0110303(VAV3)	3	221	13	7393	0.00603676
GO:0007605	sensory perception of sound	biological_process	8	circRNA12487(COL2A1);circRNA14123(COL1A1);circRNA14135(COL1A1);circRNA14138(COL1A1);circRNA14144(COL1A1);circRNA14146(COL1A1);circRNA14148(COL1A1);circRNA14149(COL1A1);circRNA14150(COL1A1);circRNA14300(COL2A1);circRNA16537(COL1A1);circRNA16767(COL2A1);circRNA17683(COL1A1);circRNA26501(PSAP);circRNA5727(COL2A1);circRNA5743(COL2A1);circRNA5747(COL2A1);circRNA5752(COL2A1);circRNA9232(COL1A1);circRNA…	6	221	56	7393	0.00621947
GO:0071773	cellular response to BMP stimulus	biological_process	8	circRNA12487(COL2A1);circRNA14300(COL2A1);circRNA14322(SMAD5);circRNA16767(COL2A1);circRNA5727(COL2A1);circRNA5743(COL2A1);circRNA5747(COL2A1);circRNA5752(COL2A1);circRNA9520(COL2A1);hsa_circ_0006952(SMAD4)	3	221	14	7393	0.00751561
GO:0007224	smoothened signaling pathway	biological_process	6	circRNA9126(WDPCP);hsa_circ_0006135(ARL13B);hsa_circ_0007387(WDPCP);hsa_circ_0013617(HIPK1);hsa_circ_0069064(EVC);hsa_circ_0095312(CDON)	5	221	42	7393	0.00788381
GO:0048705	skeletal system morphogenesis	biological_process	6	circRNA12487(COL2A1);circRNA14123(COL1A1);circRNA14135(COL1A1);circRNA14138(COL1A1);circRNA14144(COL1A1);circRNA14146(COL1A1);circRNA14148(COL1A1);circRNA14149(COL1A1);circRNA14150(COL1A1);circRNA14300(COL2A1);circRNA16537(COL1A1);circRNA16767(COL2A1);circRNA17683(COL1A1);circRNA23519(PLEKHA1);circRNA5727(COL2A1);circRNA5743(COL2A1);circRNA5747(COL2A1);circRNA5752(COL2A1);circRNA9232(COL1A1);circ…	4	221	27	7393	0.00794405
GO:0030838	positive regulation of actin filament polymerization	biological_process	9	hsa_circ_0023475(FCHSD2);hsa_circ_0057276(NCKAP1);hsa_circ_0068681(DLG1);hsa_circ_0103284(FMN1)	4	221	27	7393	0.00794405
GO:0010606	positive regulation of cytoplasmic mRNA processing body assembly	biological_process	8	circRNA14161(PAN3);circRNA303(CNOT2)	2	221	5	7393	0.00838111
GO:0031063	regulation of histone deacetylation	biological_process	10	circRNA24369(MAPK8);hsa_circ_0008283(TADA2A)	2	221	5	7393	0.00838111
GO:0006047	UDP-N-acetylglucosamine metabolic process	biological_process	7	circRNA9192(GFPT1);hsa_circ_0013299(SLC35A3)	2	221	5	7393	0.00838111
GO:0001881	receptor recycling	biological_process	8	hsa_circ_0002182(ARFGEF2);hsa_circ_0003154(CAMLG)	2	221	5	7393	0.00838111
GO:0045053	protein retention in Golgi apparatus	biological_process	7	hsa_circ_0004222(VPS13D);hsa_circ_0007677(VPS13D);hsa_circ_0087243(VPS13A)	2	221	5	7393	0.00838111
GO:0034340	response to type I interferon	biological_process	7	hsa_circ_0005116(SP100);hsa_circ_0005870(SETD2)	2	221	5	7393	0.00838111
GO:0030020	extracellular matrix structural constituent conferring tensile strength	molecular_function	5	circRNA12487(COL2A1);circRNA14123(COL1A1);circRNA14135(COL1A1);circRNA14138(COL1A1);circRNA14144(COL1A1);circRNA14146(COL1A1);circRNA14148(COL1A1);circRNA14149(COL1A1);circRNA14150(COL1A1);circRNA14300(COL2A1);circRNA14404(COL3A1);circRNA16537(COL1A1);circRNA16767(COL2A1);circRNA16824(COL1A2);circRNA17683(COL1A1);circRNA5727(COL2A1);circRNA5743(COL2A1);circRNA5747(COL2A1);circRNA5752(COL2A1);circ…	4	221	28	7393	0.00905509
GO:0000242	pericentriolar material	cellular_component	7	circRNA8872(CDK5RAP2);hsa_circ_0047003(CEP192);hsa_circ_0133850(WDR60)	3	221	15	7393	0.00918996
GO:0008092	cytoskeletal protein binding	molecular_function	5	circRNA23472(NEBL);circRNA5676(EPB41L5);ciRNA279(TOR1AIP1);hsa_circ_0068681(DLG1);hsa_circ_0131958(DST)	5	221	45	7393	0.0105356
GO:0048704	embryonic skeletal system morphogenesis	biological_process	7	circRNA4007(SATB2);hsa_circ_0068681(DLG1);hsa_circ_0133850(WDR60)	3	221	16	7393	0.0110648
GO:0043552	positive regulation of phosphatidylinositol 3-kinase activity	biological_process	10	circRNA16794(PTK2);hsa_circ_0005576(CDC42);hsa_circ_0110303(VAV3)	3	221	16	7393	0.0110648
GO:0085029	extracellular matrix assembly	biological_process	6	circRNA16824(COL1A2);circRNA5862(COL1A2);circRNA5863(COL1A2);circRNA9609(COL1A2);circRNA9611(COL1A2);circRNA9614(COL1A2);circRNA9617(COL1A2);hsa_circ_0002837(TGFB1)	2	221	6	7393	0.0123251
GO:0018149	peptide cross-linking	biological_process	9	circRNA14404(COL3A1);circRNA5041(FN1)	2	221	6	7393	0.0123251
GO:2000573	positive regulation of DNA biosynthetic process	biological_process	9	circRNA5998(SMOC2);hsa_circ_0100479(RGCC)	2	221	6	7393	0.0123251
GO:1901522	positive regulation of transcription from RNA polymerase II promoter involved in cellular response to chemical stimulus	biological_process	11	circRNA14322(SMAD5);hsa_circ_0006952(SMAD4)	2	221	6	7393	0.0123251
GO:0043589	skin morphogenesis	biological_process	6	circRNA14123(COL1A1);circRNA14135(COL1A1);circRNA14138(COL1A1);circRNA14144(COL1A1);circRNA14146(COL1A1);circRNA14148(COL1A1);circRNA14149(COL1A1);circRNA14150(COL1A1);circRNA16537(COL1A1);circRNA16824(COL1A2);circRNA17683(COL1A1);circRNA5862(COL1A2);circRNA5863(COL1A2);circRNA9232(COL1A1);circRNA9233(COL1A1);circRNA9238(COL1A1);circRNA9609(COL1A2);circRNA9611(COL1A2);circRNA9614(COL1A2);circRNA9…	2	221	6	7393	0.0123251
GO:0051660	establishment of centrosome localization	biological_process	7	hsa_circ_0018168(PARD3);hsa_circ_0068681(DLG1)	2	221	6	7393	0.0123251
GO:0021799	cerebral cortex radially oriented cell migration	biological_process	10	circRNA5822(FUT10);circRNA5903(SOCS7)	2	221	6	7393	0.0123251
GO:0005539	glycosaminoglycan binding	molecular_function	5	circRNA5660(VCAN);circRNA5713(BGN);circRNA5998(SMOC2);hsa_circ_0073237(VCAN)	3	221	17	7393	0.0131442
GO:0070006	metalloaminopeptidase activity	molecular_function	9	ciRNA2777(LVRN);hsa_circ_0002191(AOPEP);hsa_circ_0116601(XPNPEP3)	3	221	17	7393	0.0131442
GO:0097730	non-motile cilium	cellular_component	5	circRNA12230(IFT122);hsa_circ_0006135(ARL13B);hsa_circ_0079860(SEPTIN7)	3	221	18	7393	0.0154312
GO:0043015	gamma-tubulin binding	molecular_function	7	circRNA28208(CEP70);circRNA8872(CDK5RAP2);hsa_circ_0008433(PDE4B)	3	221	18	7393	0.0154312
GO:0001568	blood vessel development	biological_process	5	circRNA14123(COL1A1);circRNA14135(COL1A1);circRNA14138(COL1A1);circRNA14144(COL1A1);circRNA14146(COL1A1);circRNA14148(COL1A1);circRNA14149(COL1A1);circRNA14150(COL1A1);circRNA14404(COL3A1);circRNA16537(COL1A1);circRNA16794(PTK2);circRNA16824(COL1A2);circRNA17683(COL1A1);circRNA5862(COL1A2);circRNA5863(COL1A2);circRNA9232(COL1A1);circRNA9233(COL1A1);circRNA9238(COL1A1);circRNA9609(COL1A2);circRNA9…	4	221	33	7393	0.0161171
GO:0071141	SMAD protein complex	cellular_component	5	circRNA14322(SMAD5);hsa_circ_0006952(SMAD4)	2	221	7	7393	0.0169177
GO:2000601	positive regulation of Arp2/3 complex-mediated actin nucleation	biological_process	11	hsa_circ_0023475(FCHSD2);hsa_circ_0057276(NCKAP1)	2	221	7	7393	0.0169177
GO:0005540	hyaluronic acid binding	molecular_function	6	circRNA12218(ACAN);circRNA5188(ACAN);circRNA5660(VCAN);hsa_circ_0073237(VCAN)	2	221	7	7393	0.0169177
GO:0006623	protein targeting to vacuole	biological_process	12	hsa_circ_0004222(VPS13D);hsa_circ_0007677(VPS13D);hsa_circ_0087243(VPS13A)	2	221	7	7393	0.0169177
GO:0030208	dermatan sulfate biosynthetic process	biological_process	9	circRNA5660(VCAN);circRNA5713(BGN);hsa_circ_0073237(VCAN)	2	221	7	7393	0.0169177
GO:0006956	complement activation	biological_process	5	hsa_circ_0100479(RGCC);hsa_circ_0137815(C5)	2	221	7	7393	0.0169177
GO:0005856	cytoskeleton	cellular_component	6	circRNA10412(TRIP4);circRNA12230(IFT122);circRNA16794(PTK2);circRNA2300(AUTS2);circRNA23615(TRIP11);circRNA23886(CDC42BPB);circRNA24008(DYNC1I1);circRNA26193(USP33);circRNA28208(CEP70);circRNA5676(EPB41L5);circRNA5694(TBCE);circRNA8872(CDK5RAP2);circRNA9126(WDPCP);circRNA9393(EFCAB2);ciRNA1534(AUTS2);hsa_circ_0002182(ARFGEF2);hsa_circ_0005576(CDC42);hsa_circ_0007387(WDPCP);hsa_circ_0013387(GPSM2)…	33	221	760	7393	0.0174018
GO:0008022	protein C-terminus binding	molecular_function	5	circRNA23835(FOXN3);circRNA5041(FN1);circRNA5114(ATXN2);circRNA5963(CCN2);circRNA9693(CCN2);hsa_circ_0004342(AFDN);hsa_circ_0013387(GPSM2);hsa_circ_0068681(DLG1);hsa_circ_0131958(DST)	8	221	111	7393	0.0177741
GO:0001657	ureteric bud development	biological_process	7	circRNA14322(SMAD5);hsa_circ_0002837(TGFB1);hsa_circ_0068681(DLG1)	3	221	19	7393	0.017928
GO:0070830	bicellular tight junction assembly	biological_process	9	hsa_circ_0004342(AFDN);hsa_circ_0018168(PARD3);hsa_circ_0068681(DLG1)	3	221	19	7393	0.017928
GO:0009612	response to mechanical stimulus	biological_process	5	circRNA14123(COL1A1);circRNA14135(COL1A1);circRNA14138(COL1A1);circRNA14144(COL1A1);circRNA14146(COL1A1);circRNA14148(COL1A1);circRNA14149(COL1A1);circRNA14150(COL1A1);circRNA14404(COL3A1);circRNA16537(COL1A1);circRNA17683(COL1A1);circRNA24369(MAPK8);circRNA9232(COL1A1);circRNA9233(COL1A1);circRNA9238(COL1A1);ciRNA131(SUN1)	4	221	35	7393	0.0196925
GO:0060325	face morphogenesis	biological_process	5	circRNA14123(COL1A1);circRNA14135(COL1A1);circRNA14138(COL1A1);circRNA14144(COL1A1);circRNA14146(COL1A1);circRNA14148(COL1A1);circRNA14149(COL1A1);circRNA14150(COL1A1);circRNA16537(COL1A1);circRNA17683(COL1A1);circRNA23519(PLEKHA1);circRNA9232(COL1A1);circRNA9233(COL1A1);circRNA9238(COL1A1);hsa_circ_0002837(TGFB1)	3	221	20	7393	0.020636
GO:0008138	protein tyrosine/serine/threonine phosphatase activity	molecular_function	9	hsa_circ_0028090(SSH1);hsa_circ_0106507(SSH2);hsa_circ_0132609(RNGTT)	3	221	20	7393	0.020636
GO:0006468	protein phosphorylation	biological_process	9	circRNA14161(PAN3);circRNA14322(SMAD5);circRNA16794(PTK2);circRNA22922(PDK1);circRNA23886(CDC42BPB);circRNA24369(MAPK8);circRNA28098(SNRK);circRNA3122(EPHA5);circRNA7183(PTPRA);hsa_circ_0000199(AKT3);hsa_circ_0002837(TGFB1);hsa_circ_0006006(PDK1);hsa_circ_0007772(RPS6KC1);hsa_circ_0008887(HIPK3);hsa_circ_0013617(HIPK1);hsa_circ_0015803(NEK7);hsa_circ_0017251(AKT3);hsa_circ_0054214(MAP4K3);hsa_cir…	18	221	360	7393	0.0219649
GO:0030207	chondroitin sulfate catabolic process	biological_process	9	circRNA5660(VCAN);circRNA5713(BGN);hsa_circ_0073237(VCAN)	2	221	8	7393	0.0221167
GO:1902041	regulation of extrinsic apoptotic signaling pathway via death domain receptors	biological_process	10	circRNA5959(CFLAR);hsa_circ_0005116(SP100)	2	221	8	7393	0.0221167
GO:0008631	intrinsic apoptotic signaling pathway in response to oxidative stress	biological_process	7	circRNA22922(PDK1);hsa_circ_0004662(SOD2);hsa_circ_0006006(PDK1)	2	221	8	7393	0.0221167
GO:0090102	cochlea development	biological_process	5	circRNA26501(PSAP);hsa_circ_0130191(SOBP)	2	221	8	7393	0.0221167
GO:0045589	regulation of regulatory T cell differentiation	biological_process	10	hsa_circ_0000707(CBFB);hsa_circ_0002837(TGFB1)	2	221	8	7393	0.0221167
GO:0022408	negative regulation of cell-cell adhesion	biological_process	7	circRNA16794(PTK2);circRNA5676(EPB41L5)	2	221	8	7393	0.0221167
GO:0060216	definitive hemopoiesis	biological_process	8	hsa_circ_0000707(CBFB);hsa_circ_0013617(HIPK1)	2	221	8	7393	0.0221167
GO:0030837	negative regulation of actin filament polymerization	biological_process	9	hsa_circ_0028090(SSH1);hsa_circ_0106507(SSH2)	2	221	8	7393	0.0221167
GO:0060021	roof of mouth development	biological_process	5	circRNA12487(COL2A1);circRNA14300(COL2A1);circRNA16767(COL2A1);circRNA23519(PLEKHA1);circRNA4007(SATB2);circRNA5727(COL2A1);circRNA5743(COL2A1);circRNA5747(COL2A1);circRNA5752(COL2A1);circRNA9126(WDPCP);circRNA9520(COL2A1);hsa_circ_0007387(WDPCP)	4	221	37	7393	0.0237211
GO:0005929	cilium	cellular_component	4	circRNA12230(IFT122);circRNA23615(TRIP11);circRNA9126(WDPCP);circRNA9393(EFCAB2);hsa_circ_0006135(ARL13B);hsa_circ_0007387(WDPCP);hsa_circ_0032725(TTLL5);hsa_circ_0069064(EVC);hsa_circ_0079860(SEPTIN7);hsa_circ_0112218(DNAH14);hsa_circ_0132829(FBXL13);hsa_circ_0132833(FBXL13);hsa_circ_0133850(WDR60)	11	221	187	7393	0.0242594
GO:0005938	cell cortex	cellular_component	7	circRNA16794(PTK2);circRNA5963(CCN2);circRNA9126(WDPCP);circRNA9693(CCN2);hsa_circ_0007387(WDPCP);hsa_circ_0013387(GPSM2);hsa_circ_0018168(PARD3);hsa_circ_0130072(RHOBTB3);hsa_circ_0131958(DST)	7	221	96	7393	0.0244451
GO:0060271	cilium assembly	biological_process	7	circRNA12230(IFT122);circRNA28208(CEP70);circRNA9126(WDPCP);hsa_circ_0001246(ATXN10);hsa_circ_0006135(ARL13B);hsa_circ_0007387(WDPCP);hsa_circ_0030582(ABCC4);hsa_circ_0079860(SEPTIN7);hsa_circ_0133850(WDR60)	8	221	119	7393	0.0258244
GO:0031252	cell leading edge	cellular_component	4	circRNA23886(CDC42BPB);circRNA5676(EPB41L5);hsa_circ_0028090(SSH1);hsa_circ_0131958(DST)	4	221	38	7393	0.0259092
GO:0002062	chondrocyte differentiation	biological_process	6	circRNA12487(COL2A1);circRNA14300(COL2A1);circRNA16767(COL2A1);circRNA4667(NFIB);circRNA5727(COL2A1);circRNA5743(COL2A1);circRNA5747(COL2A1);circRNA5752(COL2A1);circRNA9520(COL2A1);circRNA9717(SOX5);hsa_circ_0098192(SOX5)	3	221	22	7393	0.0266879
GO:0021702	cerebellar Purkinje cell differentiation	biological_process	7	circRNA26501(PSAP);circRNA29685(HERC1)	2	221	9	7393	0.0278823
GO:0071732	cellular response to nitric oxide	biological_process	8	circRNA5959(CFLAR);hsa_circ_0003929(MTR)	2	221	9	7393	0.0278823
GO:0030695	GTPase regulator activity	molecular_function	6	circRNA29536(RIN2);hsa_circ_0013387(GPSM2)	2	221	9	7393	0.0278823
GO:0016504	peptidase activator activity	molecular_function	6	circRNA5041(FN1);circRNA5959(CFLAR)	2	221	9	7393	0.0278823
GO:0005671	Ada2/Gcn5/Ada3 transcription activator complex	cellular_component	8	hsa_circ_0006614(YEATS2);hsa_circ_0008283(TADA2A)	2	221	9	7393	0.0278823
GO:0042118	endothelial cell activation	biological_process	5	circRNA3422(FOXP1);hsa_circ_0006952(SMAD4);hsa_circ_0008234(FOXP1)	2	221	9	7393	0.0278823
GO:0003279	cardiac septum development	biological_process	5	circRNA2842(ADAMTS6);circRNA2845(ADAMTS6);circRNA7738(ADAMTS6);hsa_circ_0006952(SMAD4)	2	221	9	7393	0.0278823
GO:0004535	poly(A)-specific ribonuclease activity	molecular_function	10	circRNA14161(PAN3);circRNA303(CNOT2)	2	221	9	7393	0.0278823
GO:0006376	mRNA splice site selection	biological_process	9	circRNA5558(KHDC4);hsa_circ_0005648(LUC7L)	2	221	9	7393	0.0278823
GO:0070411	I-SMAD binding	molecular_function	6	hsa_circ_0006952(SMAD4);hsa_circ_0045350(AXIN2)	2	221	9	7393	0.0278823
GO:0070986	left/right axis specification	biological_process	6	circRNA5676(EPB41L5);hsa_circ_0006135(ARL13B)	2	221	9	7393	0.0278823
GO:0010763	positive regulation of fibroblast migration	biological_process	9	circRNA16794(PTK2);hsa_circ_0002837(TGFB1)	2	221	9	7393	0.0278823
GO:0042995	cell projection	cellular_component	4	circRNA12230(IFT122);circRNA16794(PTK2);circRNA2300(AUTS2);circRNA23886(CDC42BPB);circRNA3122(EPHA5);circRNA5660(VCAN);circRNA9126(WDPCP);circRNA9393(EFCAB2);ciRNA1534(AUTS2);hsa_circ_0002182(ARFGEF2);hsa_circ_0005576(CDC42);hsa_circ_0006135(ARL13B);hsa_circ_0007387(WDPCP);hsa_circ_0008649(PIP5KL1);hsa_circ_0015491(CEP350);hsa_circ_0023475(FCHSD2);hsa_circ_0028090(SSH1);hsa_circ_0032725(TTLL5);hs…	25	221	561	7393	0.0280245
GO:0006508	proteolysis	biological_process	7	circRNA12121(SENP6);circRNA12218(ACAN);circRNA16515(MINDY3);circRNA23960(TPP2);circRNA26193(USP33);circRNA2842(ADAMTS6);circRNA2845(ADAMTS6);circRNA5188(ACAN);circRNA5518(NRDC);circRNA5959(CFLAR);circRNA7738(ADAMTS6);ciRNA2777(LVRN);hsa_circ_0002191(AOPEP);hsa_circ_0095144(USP47);hsa_circ_0103799(SPPL2A);hsa_circ_0104765(ADAMTSL3);hsa_circ_0116601(XPNPEP3)	14	221	266	7393	0.0280872
GO:0019005	SCF ubiquitin ligase complex	cellular_component	7	circRNA3077(FBXL5);hsa_circ_0024169(CUL5);hsa_circ_0095144(USP47);hsa_circ_0132829(FBXL13);hsa_circ_0132833(FBXL13)	4	221	39	7393	0.0282147
GO:0097016	L27 domain binding	molecular_function	6	hsa_circ_0068681(DLG1)	1	221	1	7393	0.0298931
GO:0034191	apolipoprotein A-I receptor binding	molecular_function	7	hsa_circ_0005576(CDC42)	1	221	1	7393	0.0298931
GO:0008192	RNA guanylyltransferase activity	molecular_function	8	hsa_circ_0132609(RNGTT)	1	221	1	7393	0.0298931
GO:0050185	phosphatidylinositol deacylase activity	molecular_function	7	ciRNA2771(PGAP1)	1	221	1	7393	0.0298931
GO:1901526	positive regulation of mitophagy	biological_process	11	hsa_circ_0004222(VPS13D);hsa_circ_0007677(VPS13D)	1	221	1	7393	0.0298931
GO:1905574	ganglioside GM2 binding	molecular_function	7	circRNA26501(PSAP)	1	221	1	7393	0.0298931
GO:0003251	positive regulation of cell proliferation involved in heart valve morphogenesis	biological_process	9	hsa_circ_0006952(SMAD4)	1	221	1	7393	0.0298931
GO:1905634	regulation of protein localization to chromatin	biological_process	8	hsa_circ_0005870(SETD2)	1	221	1	7393	0.0298931
GO:0060661	submandibular salivary gland formation	biological_process	5	hsa_circ_0005576(CDC42)	1	221	1	7393	0.0298931
GO:0032423	regulation of mismatch repair	biological_process	10	hsa_circ_0045350(AXIN2)	1	221	1	7393	0.0298931
GO:0032280	symmetric synapse	cellular_component	5	hsa_circ_0002182(ARFGEF2)	1	221	1	7393	0.0298931
GO:0007509	mesoderm migration involved in gastrulation	biological_process	9	circRNA5676(EPB41L5)	1	221	1	7393	0.0298931
GO:1901740	negative regulation of myoblast fusion	biological_process	11	circRNA5959(CFLAR)	1	221	1	7393	0.0298931
GO:0060751	branch elongation involved in mammary gland duct branching	biological_process	8	hsa_circ_0002837(TGFB1)	1	221	1	7393	0.0298931
GO:0021830	interneuron migration from the subpallium to the cortex	biological_process	11	hsa_circ_0006135(ARL13B)	1	221	1	7393	0.0298931
GO:0061141	lung ciliated cell differentiation	biological_process	8	circRNA4667(NFIB)	1	221	1	7393	0.0298931
GO:0035470	positive regulation of vascular wound healing	biological_process	9	circRNA5998(SMOC2)	1	221	1	7393	0.0298931
GO:0001100	negative regulation of exit from mitosis	biological_process	10	hsa_circ_0100479(RGCC)	1	221	1	7393	0.0298931
GO:0000096	sulfur amino acid metabolic process	biological_process	9	hsa_circ_0003929(MTR)	1	221	1	7393	0.0298931
GO:0003069	acetylcholine-mediated vasodilation involved in regulation of systemic arterial blood pressure	biological_process	8	hsa_circ_0004662(SOD2)	1	221	1	7393	0.0298931
GO:0072133	metanephric mesenchyme morphogenesis	biological_process	8	hsa_circ_0006952(SMAD4)	1	221	1	7393	0.0298931
GO:0033686	positive regulation of luteinizing hormone secretion	biological_process	10	hsa_circ_0006952(SMAD4)	1	221	1	7393	0.0298931
GO:0060689	cell differentiation involved in salivary gland development	biological_process	6	circRNA4667(NFIB)	1	221	1	7393	0.0298931
GO:1903845	negative regulation of cellular response to transforming growth factor beta stimulus	biological_process	8	circRNA5959(CFLAR)	1	221	1	7393	0.0298931
GO:0021902	commitment of neuronal cell to specific neuron type in forebrain	biological_process	8	circRNA4007(SATB2)	1	221	1	7393	0.0298931
GO:0019482	beta-alanine metabolic process	biological_process	9	hsa_circ_0126678(AASDH)	1	221	1	7393	0.0298931
GO:0008705	methionine synthase activity	molecular_function	8	hsa_circ_0003929(MTR)	1	221	1	7393	0.0298931
GO:1902595	regulation of DNA replication origin binding	biological_process	7	circRNA24369(MAPK8)	1	221	1	7393	0.0298931
GO:1990876	cytoplasmic side of nuclear pore	cellular_component	6	hsa_circ_0089172(NUP214)	1	221	1	7393	0.0298931
GO:0001865	NK T cell differentiation	biological_process	10	circRNA26501(PSAP)	1	221	1	7393	0.0298931
GO:1905575	ganglioside GM3 binding	molecular_function	8	circRNA26501(PSAP)	1	221	1	7393	0.0298931
GO:0070208	protein heterotrimerization	biological_process	9	circRNA16824(COL1A2);circRNA5862(COL1A2);circRNA5863(COL1A2);circRNA9609(COL1A2);circRNA9611(COL1A2);circRNA9614(COL1A2);circRNA9617(COL1A2)	1	221	1	7393	0.0298931
GO:1901256	regulation of macrophage colony-stimulating factor production	biological_process	7	circRNA3422(FOXP1);hsa_circ_0008234(FOXP1)	1	221	1	7393	0.0298931
GO:0060452	positive regulation of cardiac muscle contraction	biological_process	10	circRNA5963(CCN2);circRNA9693(CCN2)	1	221	1	7393	0.0298931
GO:1903764	regulation of potassium ion export across plasma membrane	biological_process	11	hsa_circ_0068681(DLG1)	1	221	1	7393	0.0298931
GO:0030432	peristalsis	biological_process	9	hsa_circ_0068681(DLG1)	1	221	1	7393	0.0298931
GO:0045066	regulatory T cell differentiation	biological_process	9	hsa_circ_0002837(TGFB1)	1	221	1	7393	0.0298931
GO:0003335	corneocyte development	biological_process	6	circRNA26501(PSAP)	1	221	1	7393	0.0298931
GO:0014008	positive regulation of microglia differentiation	biological_process	11	hsa_circ_0002837(TGFB1)	1	221	1	7393	0.0298931
GO:0043041	amino acid activation for nonribosomal peptide biosynthetic process	biological_process	10	hsa_circ_0126678(AASDH)	1	221	1	7393	0.0298931
GO:0004906	interferon-gamma receptor activity	molecular_function	8	hsa_circ_0002113(IFNGR2)	1	221	1	7393	0.0298931
GO:0006678	glucosylceramide metabolic process	biological_process	11	circRNA26501(PSAP)	1	221	1	7393	0.0298931
GO:0045175	basal protein localization	biological_process	6	hsa_circ_0005649(ERBIN)	1	221	1	7393	0.0298931
GO:0042558	pteridine-containing compound metabolic process	biological_process	6	hsa_circ_0003929(MTR)	1	221	1	7393	0.0298931
GO:0060022	hard palate development	biological_process	5	hsa_circ_0068681(DLG1)	1	221	1	7393	0.0298931
GO:0072134	nephrogenic mesenchyme morphogenesis	biological_process	8	hsa_circ_0006952(SMAD4)	1	221	1	7393	0.0298931
GO:1990188	euchromatin binding	molecular_function	5	hsa_circ_0083952(ASH2L)	1	221	1	7393	0.0298931
GO:1903286	regulation of potassium ion import	biological_process	11	hsa_circ_0068681(DLG1)	1	221	1	7393	0.0298931
GO:0005586	collagen type III trimer	cellular_component	6	circRNA14404(COL3A1)	1	221	1	7393	0.0298931
GO:0031673	H zone	cellular_component	5	hsa_circ_0131958(DST)	1	221	1	7393	0.0298931
GO:0045547	dehydrodolichyl diphosphate synthase activity	molecular_function	7	ciRNA1546(DHDDS)	1	221	1	7393	0.0298931
GO:0097541	axonemal basal plate	cellular_component	7	circRNA9126(WDPCP);hsa_circ_0007387(WDPCP)	1	221	1	7393	0.0298931
GO:0005585	collagen type II trimer	cellular_component	6	circRNA12487(COL2A1);circRNA14300(COL2A1);circRNA16767(COL2A1);circRNA5727(COL2A1);circRNA5743(COL2A1);circRNA5747(COL2A1);circRNA5752(COL2A1);circRNA9520(COL2A1)	1	221	1	7393	0.0298931
GO:0004484	mRNA guanylyltransferase activity	molecular_function	9	hsa_circ_0132609(RNGTT)	1	221	1	7393	0.0298931
GO:0070841	inclusion body assembly	biological_process	6	circRNA26501(PSAP)	1	221	1	7393	0.0298931
GO:0009817	defense response to fungus, incompatible interaction	biological_process	7	hsa_circ_0002837(TGFB1)	1	221	1	7393	0.0298931
GO:0032667	regulation of interleukin-23 production	biological_process	7	hsa_circ_0002837(TGFB1)	1	221	1	7393	0.0298931
GO:0048319	axial mesoderm morphogenesis	biological_process	7	circRNA5676(EPB41L5)	1	221	1	7393	0.0298931
GO:0034039	8-oxo-7,8-dihydroguanine DNA N-glycosylase activity	molecular_function	10	hsa_circ_0008027(OGG1)	1	221	1	7393	0.0298931
GO:1905932	positive regulation of vascular smooth muscle cell differentiation involved in phenotypic switching	biological_process	11	hsa_circ_0004662(SOD2)	1	221	1	7393	0.0298931
GO:0008488	gamma-glutamyl carboxylase activity	molecular_function	7	hsa_circ_0055426(GGCX)	1	221	1	7393	0.0298931
GO:1905305	negative regulation of cardiac myofibril assembly	biological_process	9	hsa_circ_0006952(SMAD4)	1	221	1	7393	0.0298931
GO:0031021	interphase microtubule organizing center	cellular_component	7	hsa_circ_0133850(WDR60)	1	221	1	7393	0.0298931
GO:0034736	cholesterol O-acyltransferase activity	molecular_function	9	hsa_circ_0015453(SOAT1)	1	221	1	7393	0.0298931
GO:1905576	ganglioside GT1b binding	molecular_function	7	circRNA26501(PSAP)	1	221	1	7393	0.0298931
GO:0001315	age-dependent response to reactive oxygen species	biological_process	7	hsa_circ_0004662(SOD2)	1	221	1	7393	0.0298931
GO:0015662	ion transmembrane transporter activity, phosphorylative mechanism	molecular_function	7	hsa_circ_0030582(ABCC4)	1	221	1	7393	0.0298931
GO:0005579	membrane attack complex	cellular_component	6	hsa_circ_0137815(C5)	1	221	1	7393	0.0298931
GO:1903893	positive regulation of ATF6-mediated unfolded protein response	biological_process	10	hsa_circ_0003039(ATF6)	1	221	1	7393	0.0298931
GO:0061040	female gonad morphogenesis	biological_process	6	hsa_circ_0006952(SMAD4)	1	221	1	7393	0.0298931
GO:1905653	positive regulation of artery morphogenesis	biological_process	8	hsa_circ_0000199(AKT3);hsa_circ_0017251(AKT3)	1	221	1	7393	0.0298931
GO:0033269	internode region of axon	cellular_component	6	hsa_circ_0018168(PARD3)	1	221	1	7393	0.0298931
GO:1905577	ganglioside GP1c binding	molecular_function	7	circRNA26501(PSAP)	1	221	1	7393	0.0298931
GO:0003829	beta-1,3-galactosyl-O-glycosyl-glycoprotein beta-1,6-N-acetylglucosaminyltransferase activity	molecular_function	8	circRNA9400(GCNT1)	1	221	1	7393	0.0298931
GO:0061181	regulation of chondrocyte development	biological_process	8	hsa_circ_0045350(AXIN2)	1	221	1	7393	0.0298931
GO:0003844	1,4-alpha-glucan branching enzyme activity	molecular_function	7	circRNA22700(GBE1)	1	221	1	7393	0.0298931
GO:0071638	negative regulation of monocyte chemotactic protein-1 production	biological_process	9	hsa_circ_0005649(ERBIN)	1	221	1	7393	0.0298931
GO:1904906	positive regulation of endothelial cell-matrix adhesion via fibronectin	biological_process	9	circRNA29536(RIN2)	1	221	1	7393	0.0298931
GO:0030882	lipid antigen binding	molecular_function	5	circRNA26501(PSAP)	1	221	1	7393	0.0298931
GO:0042482	positive regulation of odontogenesis	biological_process	9	hsa_circ_0002837(TGFB1)	1	221	1	7393	0.0298931
GO:0019075	virus maturation	biological_process	7	hsa_circ_0008240(MVB12B)	1	221	1	7393	0.0298931
GO:0032943	mononuclear cell proliferation	biological_process	5	hsa_circ_0002837(TGFB1)	1	221	1	7393	0.0298931
GO:0002094	polyprenyltransferase activity	molecular_function	7	ciRNA1546(DHDDS)	1	221	1	7393	0.0298931
GO:0102752	1,4-alpha-glucan branching enzyme activity (using a glucosylated glycogenin as primer for glycogen synthesis)	molecular_function	7	circRNA22700(GBE1)	1	221	1	7393	0.0298931
GO:1904423	dehydrodolichyl diphosphate synthase complex	cellular_component	6	ciRNA1546(DHDDS)	1	221	1	7393	0.0298931
GO:0002369	T cell cytokine production	biological_process	6	hsa_circ_0068681(DLG1)	1	221	1	7393	0.0298931
GO:0034021	response to silicon dioxide	biological_process	6	hsa_circ_0004662(SOD2)	1	221	1	7393	0.0298931
GO:0045007	depurination	biological_process	9	hsa_circ_0008027(OGG1)	1	221	1	7393	0.0298931
GO:0120043	stereocilium shaft	cellular_component	4	hsa_circ_0023475(FCHSD2)	1	221	1	7393	0.0298931
GO:0071691	cardiac muscle thin filament assembly	biological_process	7	circRNA23472(NEBL)	1	221	1	7393	0.0298931
GO:0070197	meiotic attachment of telomere to nuclear envelope	biological_process	6	ciRNA131(SUN1)	1	221	1	7393	0.0298931
GO:0014866	skeletal myofibril assembly	biological_process	8	circRNA5959(CFLAR)	1	221	1	7393	0.0298931
GO:0021871	forebrain regionalization	biological_process	6	ciRNA2771(PGAP1)	1	221	1	7393	0.0298931
GO:0060272	embryonic skeletal joint morphogenesis	biological_process	8	circRNA12487(COL2A1);circRNA14300(COL2A1);circRNA16767(COL2A1);circRNA5727(COL2A1);circRNA5743(COL2A1);circRNA5747(COL2A1);circRNA5752(COL2A1);circRNA9520(COL2A1)	1	221	1	7393	0.0298931
GO:0072537	fibroblast activation	biological_process	5	hsa_circ_0100479(RGCC)	1	221	1	7393	0.0298931
GO:0048773	erythrophore differentiation	biological_process	7	hsa_circ_0004662(SOD2)	1	221	1	7393	0.0298931
GO:1905572	ganglioside GM1 transport to membrane	biological_process	9	circRNA26501(PSAP)	1	221	1	7393	0.0298931
GO:0008534	oxidized purine nucleobase lesion DNA N-glycosylase activity	molecular_function	9	hsa_circ_0008027(OGG1)	1	221	1	7393	0.0298931
GO:0005176	ErbB-2 class receptor binding	molecular_function	6	hsa_circ_0005649(ERBIN)	1	221	1	7393	0.0298931
GO:0034505	tooth mineralization	biological_process	7	circRNA14123(COL1A1);circRNA14135(COL1A1);circRNA14138(COL1A1);circRNA14144(COL1A1);circRNA14146(COL1A1);circRNA14148(COL1A1);circRNA14149(COL1A1);circRNA14150(COL1A1);circRNA16537(COL1A1);circRNA17683(COL1A1);circRNA9232(COL1A1);circRNA9233(COL1A1);circRNA9238(COL1A1)	1	221	1	7393	0.0298931
GO:2001198	regulation of dendritic cell differentiation	biological_process	8	ciRNA902(HLA-B)	1	221	1	7393	0.0298931
GO:0003331	positive regulation of extracellular matrix constituent secretion	biological_process	9	hsa_circ_0100479(RGCC)	1	221	1	7393	0.0298931
GO:0002081	outer acrosomal membrane	cellular_component	7	circRNA23615(TRIP11)	1	221	1	7393	0.0298931
GO:0051101	regulation of DNA binding	biological_process	6	hsa_circ_0002837(TGFB1)	1	221	1	7393	0.0298931
GO:0002486	antigen processing and presentation of endogenous peptide antigen via MHC class I via ER pathway, TAP-independent	biological_process	9	ciRNA902(HLA-B)	1	221	1	7393	0.0298931
GO:0099645	neurotransmitter receptor localization to postsynaptic specialization membrane	biological_process	8	hsa_circ_0068681(DLG1)	1	221	1	7393	0.0298931
GO:0004983	neuropeptide Y receptor activity	molecular_function	8	circRNA23863(APLF);ciRNA2788(APLF)	1	221	1	7393	0.0298931
GO:0061035	regulation of cartilage development	biological_process	7	hsa_circ_0002837(TGFB1)	1	221	1	7393	0.0298931
GO:0090461	glutamate homeostasis	biological_process	10	hsa_circ_0006662(GLS)	1	221	1	7393	0.0298931
GO:0050355	triphosphatase activity	molecular_function	8	hsa_circ_0132609(RNGTT)	1	221	1	7393	0.0298931
GO:0002460	adaptive immune response based on somatic recombination of immune receptors built from immunoglobulin superfamily domains	biological_process	6	hsa_circ_0002837(TGFB1)	1	221	1	7393	0.0298931
GO:0010760	negative regulation of macrophage chemotaxis	biological_process	9	hsa_circ_0137815(C5)	1	221	1	7393	0.0298931
GO:0097500	receptor localization to non-motile cilium	biological_process	10	hsa_circ_0006135(ARL13B)	1	221	1	7393	0.0298931
GO:0010603	regulation of cytoplasmic mRNA processing body assembly	biological_process	7	circRNA5114(ATXN2)	1	221	1	7393	0.0298931
GO:2001202	negative regulation of transforming growth factor-beta secretion	biological_process	9	circRNA5041(FN1)	1	221	1	7393	0.0298931
GO:0048859	formation of anatomical boundary	biological_process	5	hsa_circ_0006952(SMAD4)	1	221	1	7393	0.0298931
GO:0070646	protein modification by small protein removal	biological_process	8	circRNA12121(SENP6)	1	221	1	7393	0.0298931
GO:0031251	PAN complex	cellular_component	4	circRNA14161(PAN3)	1	221	1	7393	0.0298931
GO:0046881	positive regulation of follicle-stimulating hormone secretion	biological_process	10	hsa_circ_0006952(SMAD4)	1	221	1	7393	0.0298931
GO:0090219	negative regulation of lipid kinase activity	biological_process	12	hsa_circ_0111889(PPP2R5A)	1	221	1	7393	0.0298931
GO:0070445	regulation of oligodendrocyte progenitor proliferation	biological_process	10	hsa_circ_0004342(AFDN)	1	221	1	7393	0.0298931
GO:0048332	mesoderm morphogenesis	biological_process	6	hsa_circ_0005870(SETD2)	1	221	1	7393	0.0298931
GO:1905573	ganglioside GM1 binding	molecular_function	7	circRNA26501(PSAP)	1	221	1	7393	0.0298931
GO:2001106	regulation of Rho guanyl-nucleotide exchange factor activity	biological_process	8	hsa_circ_0103919(CCPG1)	1	221	1	7393	0.0298931
GO:0034059	response to anoxia	biological_process	5	circRNA5963(CCN2);circRNA9693(CCN2)	1	221	1	7393	0.0298931
GO:2000209	regulation of anoikis	biological_process	9	hsa_circ_0114049(ANKRD13C)	1	221	1	7393	0.0298931
GO:1905313	transforming growth factor beta receptor signaling pathway involved in heart development	biological_process	9	hsa_circ_0002837(TGFB1)	1	221	1	7393	0.0298931
GO:0016094	polyprenol biosynthetic process	biological_process	9	ciRNA1546(DHDDS)	1	221	1	7393	0.0298931
GO:0021740	principal sensory nucleus of trigeminal nerve development	biological_process	7	circRNA4667(NFIB)	1	221	1	7393	0.0298931
GO:1905143	eukaryotic translation initiation factor 2 complex assembly	biological_process	7	circRNA5904(CDC123)	1	221	1	7393	0.0298931
GO:0031536	positive regulation of exit from mitosis	biological_process	10	hsa_circ_0002837(TGFB1)	1	221	1	7393	0.0298931
GO:0006931	substrate-dependent cell migration, cell attachment to substrate	biological_process	6	circRNA5676(EPB41L5)	1	221	1	7393	0.0298931
GO:0045655	regulation of monocyte differentiation	biological_process	9	circRNA3422(FOXP1);hsa_circ_0008234(FOXP1)	1	221	1	7393	0.0298931
GO:1903944	negative regulation of hepatocyte apoptotic process	biological_process	11	circRNA5959(CFLAR)	1	221	1	7393	0.0298931
GO:0045843	negative regulation of striated muscle tissue development	biological_process	9	hsa_circ_0005648(LUC7L)	1	221	1	7393	0.0298931
GO:0045187	regulation of circadian sleep/wake cycle, sleep	biological_process	7	hsa_circ_0114230(PER3)	1	221	1	7393	0.0298931
GO:0010878	cholesterol storage	biological_process	6	hsa_circ_0015453(SOAT1)	1	221	1	7393	0.0298931
GO:2000795	negative regulation of epithelial cell proliferation involved in lung morphogenesis	biological_process	9	circRNA4667(NFIB)	1	221	1	7393	0.0298931
GO:0099013	neuronal dense core vesicle lumen	cellular_component	5	hsa_circ_0087243(VPS13A)	1	221	1	7393	0.0298931
GO:0046977	TAP binding	molecular_function	5	ciRNA902(HLA-B)	1	221	1	7393	0.0298931
GO:0070202	regulation of establishment of protein localization to chromosome	biological_process	8	circRNA9218(SPIDR);ciRNA2431(SPIDR);hsa_circ_0136657(SPIDR)	1	221	1	7393	0.0298931
GO:1902850	microtubule cytoskeleton organization involved in mitosis	biological_process	8	hsa_circ_0005870(SETD2)	1	221	1	7393	0.0298931
GO:0010869	regulation of receptor biosynthetic process	biological_process	8	hsa_circ_0114049(ANKRD13C)	1	221	1	7393	0.0298931
GO:0044300	cerebellar mossy fiber	cellular_component	7	circRNA4667(NFIB)	1	221	1	7393	0.0298931
GO:1902618	cellular response to fluoride	biological_process	7	circRNA14123(COL1A1);circRNA14135(COL1A1);circRNA14138(COL1A1);circRNA14144(COL1A1);circRNA14146(COL1A1);circRNA14148(COL1A1);circRNA14149(COL1A1);circRNA14150(COL1A1);circRNA16537(COL1A1);circRNA17683(COL1A1);circRNA9232(COL1A1);circRNA9233(COL1A1);circRNA9238(COL1A1)	1	221	1	7393	0.0298931
GO:0001306	age-dependent response to oxidative stress	biological_process	6	hsa_circ_0004662(SOD2)	1	221	1	7393	0.0298931
GO:1901291	negative regulation of double-strand break repair via single-strand annealing	biological_process	12	hsa_circ_0008027(OGG1)	1	221	1	7393	0.0298931
GO:0032651	regulation of interleukin-1 beta production	biological_process	8	circRNA3422(FOXP1);hsa_circ_0008234(FOXP1)	1	221	1	7393	0.0298931
GO:0016404	15-hydroxyprostaglandin dehydrogenase (NAD+) activity	molecular_function	7	hsa_circ_0030582(ABCC4)	1	221	1	7393	0.0298931
GO:1903760	regulation of voltage-gated potassium channel activity involved in ventricular cardiac muscle cell action potential repolarization	biological_process	9	hsa_circ_0068681(DLG1)	1	221	1	7393	0.0298931
GO:0001839	neural plate morphogenesis	biological_process	8	circRNA5676(EPB41L5)	1	221	1	7393	0.0298931
GO:0006543	glutamine catabolic process	biological_process	12	hsa_circ_0006662(GLS)	1	221	1	7393	0.0298931
GO:0007227	signal transduction downstream of smoothened	biological_process	6	circRNA12230(IFT122)	1	221	1	7393	0.0298931
GO:0004772	sterol O-acyltransferase activity	molecular_function	8	hsa_circ_0015453(SOAT1)	1	221	1	7393	0.0298931
GO:0048010	vascular endothelial growth factor receptor signaling pathway	biological_process	8	circRNA16794(PTK2);hsa_circ_0005576(CDC42);hsa_circ_0057276(NCKAP1);hsa_circ_0110303(VAV3)	4	221	40	7393	0.0306387
GO:0072686	mitotic spindle	cellular_component	7	circRNA5607(TFDP2);hsa_circ_0005576(CDC42);hsa_circ_0006614(YEATS2);hsa_circ_0008283(TADA2A);hsa_circ_0057582(HECW2)	5	221	59	7393	0.0309125
GO:0038096	Fc-gamma receptor signaling pathway involved in phagocytosis	biological_process	8	circRNA16794(PTK2);hsa_circ_0005576(CDC42);hsa_circ_0057276(NCKAP1);hsa_circ_0110303(VAV3)	4	221	41	7393	0.0331819
GO:0060333	interferon-gamma-mediated signaling pathway	biological_process	7	ciRNA902(HLA-B);hsa_circ_0002113(IFNGR2);hsa_circ_0005116(SP100)	3	221	24	7393	0.0335844
GO:0004896	cytokine receptor activity	molecular_function	6	circRNA2825(IL6ST);ciRNA292(IL3RA);hsa_circ_0002113(IFNGR2)	3	221	24	7393	0.0335844
GO:0005049	nuclear export signal receptor activity	molecular_function	5	hsa_circ_0002745(RANBP17);hsa_circ_0089172(NUP214)	2	221	10	7393	0.0341762
GO:0017119	Golgi transport complex	cellular_component	7	hsa_circ_0005576(CDC42);hsa_circ_0016867(COG2)	2	221	10	7393	0.0341762
GO:0071556	integral component of lumenal side of endoplasmic reticulum membrane	cellular_component	8	ciRNA902(HLA-B);hsa_circ_0103799(SPPL2A)	2	221	10	7393	0.0341762
GO:0022904	respiratory electron transport chain	biological_process	7	ciRNA2838(AIFM2);hsa_circ_0004662(SOD2)	2	221	10	7393	0.0341762
GO:0008637	apoptotic mitochondrial changes	biological_process	7	ciRNA2838(AIFM2);hsa_circ_0004662(SOD2)	2	221	10	7393	0.0341762
GO:0010569	regulation of double-strand break repair via homologous recombination	biological_process	10	circRNA9218(SPIDR);ciRNA2431(SPIDR);hsa_circ_0005870(SETD2);hsa_circ_0136657(SPIDR)	2	221	10	7393	0.0341762
GO:0007018	microtubule-based movement	biological_process	5	circRNA24008(DYNC1I1);hsa_circ_0012906(WDR78);hsa_circ_0112218(DNAH14);hsa_circ_0133850(WDR60);hsa_circ_0135154(DYNC1I1)	4	221	42	7393	0.0358448
GO:0071944	cell periphery	cellular_component	4	circRNA3122(EPHA5);circRNA5998(SMOC2);hsa_circ_0005576(CDC42);hsa_circ_0008433(PDE4B)	4	221	42	7393	0.0358448
GO:0008233	peptidase activity	molecular_function	5	circRNA12121(SENP6);circRNA16515(MINDY3);circRNA23960(TPP2);circRNA26193(USP33);circRNA2842(ADAMTS6);circRNA2845(ADAMTS6);circRNA5518(NRDC);circRNA7738(ADAMTS6);ciRNA2777(LVRN);hsa_circ_0002191(AOPEP);hsa_circ_0095144(USP47);hsa_circ_0103799(SPPL2A);hsa_circ_0104765(ADAMTSL3);hsa_circ_0116601(XPNPEP3)	12	221	224	7393	0.035976
GO:0035556	intracellular signal transduction	biological_process	5	circRNA1882(NFATC1);circRNA23886(CDC42BPB);circRNA24369(MAPK8);circRNA28098(SNRK);circRNA5082(NFATC1);circRNA5903(SOCS7);circRNA5963(CCN2);circRNA9693(CCN2);hsa_circ_0000199(AKT3);hsa_circ_0001005(ASB3);hsa_circ_0002182(ARFGEF2);hsa_circ_0006952(SMAD4);hsa_circ_0017251(AKT3);hsa_circ_0054214(MAP4K3);hsa_circ_0067347(NEK11);hsa_circ_0110303(VAV3)	13	221	251	7393	0.0375767
GO:0005615	extracellular space	cellular_component	4	circRNA12487(COL2A1);circRNA14123(COL1A1);circRNA14135(COL1A1);circRNA14138(COL1A1);circRNA14144(COL1A1);circRNA14146(COL1A1);circRNA14148(COL1A1);circRNA14149(COL1A1);circRNA14150(COL1A1);circRNA14300(COL2A1);circRNA14404(COL3A1);circRNA16537(COL1A1);circRNA16767(COL2A1);circRNA16824(COL1A2);circRNA17683(COL1A1);circRNA2321(SEMA3D);circRNA26501(PSAP);circRNA5041(FN1);circRNA5660(VCAN);circRNA571…	19	221	411	7393	0.0381834
GO:0010613	positive regulation of cardiac muscle hypertrophy	biological_process	10	circRNA16794(PTK2);circRNA2825(IL6ST)	2	221	11	7393	0.040962
GO:0010575	positive regulation of vascular endothelial growth factor production	biological_process	8	circRNA2825(IL6ST);hsa_circ_0137815(C5)	2	221	11	7393	0.040962
GO:0051571	positive regulation of histone H3-K4 methylation	biological_process	12	circRNA2300(AUTS2);ciRNA1534(AUTS2);hsa_circ_0006952(SMAD4)	2	221	11	7393	0.040962
GO:0051298	centrosome duplication	biological_process	5	circRNA26193(USP33);hsa_circ_0047003(CEP192)	2	221	11	7393	0.040962
GO:0005086	ARF guanyl-nucleotide exchange factor activity	molecular_function	8	circRNA29685(HERC1);hsa_circ_0002182(ARFGEF2)	2	221	11	7393	0.040962
GO:0007498	mesoderm development	biological_process	6	circRNA5676(EPB41L5);hsa_circ_0006952(SMAD4)	2	221	11	7393	0.040962
GO:0030099	myeloid cell differentiation	biological_process	6	circRNA28098(SNRK);hsa_circ_0000707(CBFB)	2	221	11	7393	0.040962
GO:0043394	proteoglycan binding	molecular_function	5	circRNA12487(COL2A1);circRNA14300(COL2A1);circRNA16767(COL2A1);circRNA5041(FN1);circRNA5727(COL2A1);circRNA5743(COL2A1);circRNA5747(COL2A1);circRNA5752(COL2A1);circRNA9520(COL2A1)	2	221	11	7393	0.040962
GO:0005521	lamin binding	molecular_function	5	ciRNA131(SUN1);ciRNA279(TOR1AIP1)	2	221	11	7393	0.040962
GO:0007097	nuclear migration	biological_process	7	circRNA16794(PTK2);hsa_circ_0005576(CDC42)	2	221	11	7393	0.040962
GO:0045104	intermediate filament cytoskeleton organization	biological_process	7	hsa_circ_0005649(ERBIN);hsa_circ_0131958(DST)	2	221	11	7393	0.040962
GO:0055093	response to hyperoxia	biological_process	5	circRNA14123(COL1A1);circRNA14135(COL1A1);circRNA14138(COL1A1);circRNA14144(COL1A1);circRNA14146(COL1A1);circRNA14148(COL1A1);circRNA14149(COL1A1);circRNA14150(COL1A1);circRNA16537(COL1A1);circRNA17683(COL1A1);circRNA9232(COL1A1);circRNA9233(COL1A1);circRNA9238(COL1A1);hsa_circ_0004662(SOD2)	2	221	11	7393	0.040962
GO:0004672	protein kinase activity	molecular_function	7	circRNA14161(PAN3);circRNA16794(PTK2);circRNA22922(PDK1);circRNA23886(CDC42BPB);circRNA24369(MAPK8);circRNA28098(SNRK);circRNA3122(EPHA5);hsa_circ_0000199(AKT3);hsa_circ_0006006(PDK1);hsa_circ_0007772(RPS6KC1);hsa_circ_0008887(HIPK3);hsa_circ_0013617(HIPK1);hsa_circ_0015803(NEK7);hsa_circ_0017251(AKT3);hsa_circ_0054214(MAP4K3);hsa_circ_0067347(NEK11);hsa_circ_0069760(AC058822)	15	221	309	7393	0.0434212
GO:0005581	collagen trimer	cellular_component	4	circRNA12487(COL2A1);circRNA14123(COL1A1);circRNA14135(COL1A1);circRNA14138(COL1A1);circRNA14144(COL1A1);circRNA14146(COL1A1);circRNA14148(COL1A1);circRNA14149(COL1A1);circRNA14150(COL1A1);circRNA14300(COL2A1);circRNA14404(COL3A1);circRNA16537(COL1A1);circRNA16767(COL2A1);circRNA16824(COL1A2);circRNA17683(COL1A1);circRNA5727(COL2A1);circRNA5743(COL2A1);circRNA5747(COL2A1);circRNA5752(COL2A1);circ…	4	221	45	7393	0.0445555
GO:0004721	phosphoprotein phosphatase activity	molecular_function	8	circRNA7183(PTPRA);hsa_circ_0028090(SSH1);hsa_circ_0068681(DLG1);hsa_circ_0106507(SSH2);hsa_circ_0111889(PPP2R5A);hsa_circ_0132609(RNGTT)	6	221	87	7393	0.0453967
GO:0050680	negative regulation of epithelial cell proliferation	biological_process	8	circRNA12230(IFT122);hsa_circ_0002837(TGFB1);hsa_circ_0068681(DLG1)	3	221	27	7393	0.045485
GO:0007507	heart development	biological_process	6	circRNA12218(ACAN);circRNA14404(COL3A1);circRNA2842(ADAMTS6);circRNA2845(ADAMTS6);circRNA5041(FN1);circRNA5188(ACAN);circRNA5607(TFDP2);circRNA5988(ACADM);circRNA7738(ADAMTS6);hsa_circ_0002837(TGFB1);hsa_circ_0004662(SOD2)	8	221	134	7393	0.0471715
GO:0045766	positive regulation of angiogenesis	biological_process	8	circRNA5998(SMOC2);hsa_circ_0000199(AKT3);hsa_circ_0013617(HIPK1);hsa_circ_0017251(AKT3);hsa_circ_0137815(C5)	4	221	46	7393	0.0476998
GO:1904837	beta-catenin-TCF complex assembly	biological_process	7	hsa_circ_0045350(AXIN2);hsa_circ_0083952(ASH2L)	2	221	12	7393	0.048205
GO:0005868	cytoplasmic dynein complex	cellular_component	6	circRNA24008(DYNC1I1);hsa_circ_0133850(WDR60);hsa_circ_0135154(DYNC1I1)	2	221	12	7393	0.048205
GO:0048589	developmental growth	biological_process	4	circRNA26501(PSAP);hsa_circ_0006952(SMAD4)	2	221	12	7393	0.048205
GO:0006895	Golgi to endosome transport	biological_process	9	hsa_circ_0087243(VPS13A);hsa_circ_0098928(MON2)	2	221	12	7393	0.048205
GO:0008585	female gonad development	biological_process	7	circRNA23519(PLEKHA1);hsa_circ_0006952(SMAD4)	2	221	12	7393	0.048205
GO:0030111	regulation of Wnt signaling pathway	biological_process	8	hsa_circ_0000707(CBFB);hsa_circ_0045350(AXIN2)	2	221	12	7393	0.048205
GO:0050853	B cell receptor signaling pathway	biological_process	8	circRNA23519(PLEKHA1);hsa_circ_0110303(VAV3)	2	221	12	7393	0.048205
GO:0035902	response to immobilization stress	biological_process	5	hsa_circ_0002837(TGFB1);hsa_circ_0004662(SOD2)	2	221	12	7393	0.048205
GO:0098839	postsynaptic density membrane	cellular_component	5	hsa_circ_0068681(DLG1);hsa_circ_0089842(NLGN4X)	2	221	12	7393	0.048205
GO:0045664	regulation of neuron differentiation	biological_process	9	circRNA8872(CDK5RAP2);hsa_circ_0095312(CDON)	2	221	12	7393	0.048205
GO:0140326	ATPase-coupled intramembrane lipid transporter activity	molecular_function	5	circRNA9130(ATP9B);hsa_circ_0002372(ATP11C)	2	221	12	7393	0.048205
GO:0035735	intraciliary transport involved in cilium assembly	biological_process	8	circRNA12230(IFT122);circRNA23615(TRIP11);hsa_circ_0133850(WDR60)	3	221	28	7393	0.0498566
