# Supplementary material for: Whole-Transcriptome Sequencing of Knee Joint Cartilage from Kashin–Beck Disease and Osteoarthritis Patients
Source: Int J Mol Sci. 2024 Apr 15;25(8):4348. doi: 10.3390/ijms25084348 (PMC11049856; doi:10.3390/ijms25084348)
Supplement: Supplementary file 1 [file ijms-25-04348-s001.zip › Supplementary Table S9_KBDVSOA_KEGG_enrichment_Gene.xlsx]

## Sheet: Sheet1
Supplementary Table S9. KEGG enrichment analysis results of differentially expressed circRNA between KBD and OA
pathway_id	pathway_name	Genes	S gene number	TS gene number	B gene number	TB gene number	pvalue
ko04933	AGE-RAGE signaling pathway in diabetic complications	circRNA14123(COL1A1);circRNA14135(COL1A1);circRNA14138(COL1A1);circRNA14144(COL1A1);circRNA14146(COL1A1);circRNA14148(COL1A1);circRNA14149(COL1A1);circRNA14150(COL1A1);circRNA14404(COL3A1);circRNA16537(COL1A1);circRNA16824(COL1A2);circRNA17683(COL1A1);circRNA1882(NFATC1);circRNA24369(MAPK8);circRNA5041(FN1);circRNA5082(NFATC1);circRNA5862(COL1A2);circRNA5863(COL1A2);circRNA9232(COL1A1);circRNA923…	10	92	56	2991	5.13831e-06
ko05165	Human papillomavirus infection	circRNA12487(COL2A1);circRNA14123(COL1A1);circRNA14135(COL1A1);circRNA14138(COL1A1);circRNA14144(COL1A1);circRNA14146(COL1A1);circRNA14148(COL1A1);circRNA14149(COL1A1);circRNA14150(COL1A1);circRNA14300(COL2A1);circRNA16537(COL1A1);circRNA16767(COL2A1);circRNA16794(PTK2);circRNA16824(COL1A2);circRNA17683(COL1A1);circRNA5041(FN1);circRNA5727(COL2A1);circRNA5743(COL2A1);circRNA5747(COL2A1);circRNA57…	13	92	164	2991	0.00126025
ko05146	Amoebiasis	circRNA14123(COL1A1);circRNA14135(COL1A1);circRNA14138(COL1A1);circRNA14144(COL1A1);circRNA14146(COL1A1);circRNA14148(COL1A1);circRNA14149(COL1A1);circRNA14150(COL1A1);circRNA14404(COL3A1);circRNA16537(COL1A1);circRNA16794(PTK2);circRNA16824(COL1A2);circRNA17683(COL1A1);circRNA5041(FN1);circRNA5862(COL1A2);circRNA5863(COL1A2);circRNA9232(COL1A1);circRNA9233(COL1A1);circRNA9238(COL1A1);circRNA9609…	6	92	44	2991	0.00197677
