# Supplementary material for: Whole-Transcriptome Sequencing of Knee Joint Cartilage from Kashin–Beck Disease and Osteoarthritis Patients
Source: Int J Mol Sci. 2024 Apr 15;25(8):4348. doi: 10.3390/ijms25084348 (PMC11049856; doi:10.3390/ijms25084348)
Supplement: Supplementary file 1 [file ijms-25-04348-s001.zip › Supplementary Table S10.xlsx]

## Sheet: GO
Supplementary Table S10. GO enrichment analysis results of differentially expressed mRNAs, IncRNAs and cricRNAs between KBD and OA
GO_ID	GO_Term	GO_function	pvalue
			mRNA	lncRNA	circRNA
GO:0030509	BMP signaling pathway	biological_process	1.6695e-06	/	/
GO:0032332	positive regulation of chondrocyte differentiation	biological_process	0.00100801	/	/
GO:0002076	osteoblast development	biological_process	0.00100801	/	/
GO:0002063	chondrocyte development	biological_process	0.00111824	/	/
GO:0001958	endochondral ossification	biological_process	0.00219681	/	/
GO:0001503	ossification	biological_process	0.00225714	/	0.00390288
GO:0001649	osteoblast differentiation	biological_process	0.00238166	/	/
GO:0001899	negative regulation of cytolysis by symbiont of host cells	biological_process	0.00249051	/	/
GO:1900125	regulation of hyaluronan biosynthetic process	biological_process	0.00249051	/	/
GO:1990009	retinal cell apoptotic process	biological_process	0.00249051	/	/
GO:2000691	negative regulation of cardiac muscle cell myoblast differentiation	biological_process	0.00249051	/	/
GO:1904240	negative regulation of VCP-NPL4-UFD1 AAA ATPase complex assembly	biological_process	0.00249051	/	/
GO:0061751	neutral sphingomyelin phosphodiesterase activity	molecular_function	0.00249051	/	/
GO:0015774	polysaccharide transport	biological_process	0.00249051	/	/
GO:0007189	adenylate cyclase-activating G protein-coupled receptor signaling pathway	biological_process	0.00257632	/	/
GO:0048247	lymphocyte chemotaxis	biological_process	0.00268968	/	/
GO:0031333	negative regulation of protein-containing complex assembly	biological_process	0.00322967	/	/
GO:0030879	mammary gland development	biological_process	0.00322967	/	/
GO:0048469	cell maturation	biological_process	0.00381608	/	/
GO:0033872	[heparan sulfate]-glucosamine 3-sulfotransferase 3 activity	molecular_function	0.00497497	/	/
GO:0003433	chondrocyte development involved in endochondral bone morphogenesis	biological_process	0.00497497	/	/
GO:1905198	manchette assembly	biological_process	0.00497497	/	/
GO:0004991	parathyroid hormone receptor activity	molecular_function	0.00497497	/	/
GO:0034681	integrin alpha11-beta1 complex	cellular_component	0.00497497	/	/
GO:0061153	trachea gland development	biological_process	0.00497497	/	/
GO:0090520	sphingolipid mediated signaling pathway	biological_process	0.00497497	/	/
GO:0021873	forebrain neuroblast division	biological_process	0.00497497	/	/
GO:0051649	establishment of localization in cell	biological_process	0.00497497	/	/
GO:2000536	negative regulation of entry of bacterium into host cell	biological_process	0.00497497	/	/
GO:0002062	chondrocyte differentiation	biological_process	0.00512544	/	0.0266879
GO:0010862	positive regulation of pathway-restricted SMAD protein phosphorylation	biological_process	0.00536107	/	/
GO:0030282	bone mineralization	biological_process	0.0056016	/	/
GO:0001501	skeletal system development	biological_process	0.00614344	/	0.00235799
GO:0007204	positive regulation of cytosolic calcium ion concentration	biological_process	0.00625721	/	/
GO:0005298	proline:sodium symporter activity	molecular_function	0.00745339	/	/
GO:0140014	mitotic nuclear division	biological_process	0.00745339	/	/
GO:1900126	negative regulation of hyaluronan biosynthetic process	biological_process	0.00745339	/	/
GO:0097116	gephyrin clustering involved in postsynaptic density assembly	biological_process	0.00745339	/	/
GO:0038064	collagen receptor activity	molecular_function	0.00745339	/	/
GO:0071899	negative regulation of estrogen receptor binding	biological_process	0.00745339	/	/
GO:0061643	chemorepulsion of axon	biological_process	0.00745339	/	/
GO:1903070	negative regulation of ER-associated ubiquitin-dependent protein catabolic process	biological_process	0.00745339	/	/
GO:0008284	positive regulation of cell population proliferation	biological_process	0.00866124	/	/
GO:0060395	SMAD protein signal transduction	biological_process	0.00886185	/	/
GO:0043621	protein self-association	molecular_function	0.00947062	/	/
GO:0042475	odontogenesis of dentin-containing tooth	biological_process	0.00978184	/	/
GO:0098868	bone growth	biological_process	0.00992577	/	/
GO:0031630	regulation of synaptic vesicle fusion to presynaptic active zone membrane	biological_process	0.00992577	/	/
GO:0071442	positive regulation of histone H3-K14 acetylation	biological_process	0.00992577	/	/
GO:0060033	anatomical structure regression	biological_process	0.00992577	/	/
GO:1903061	positive regulation of protein lipidation	biological_process	0.00992577	/	/
GO:0030135	coated vesicle	cellular_component	0.00992577	/	/
GO:0021943	formation of radial glial scaffolds	biological_process	0.00992577	/	/
GO:1902842	negative regulation of netrin-activated signaling pathway	biological_process	0.00992577	/	/
GO:0038065	collagen-activated signaling pathway	biological_process	0.00992577	/	/
GO:0015820	leucine transport	biological_process	0.00992577	/	/
GO:0030223	neutrophil differentiation	biological_process	0.00992577	/	/
GO:0006684	sphingomyelin metabolic process	biological_process	0.00992577	/	/
GO:0032983	kainate selective glutamate receptor complex	cellular_component	0.00992577	/	/
GO:0071461	cellular response to redox state	biological_process	0.00992577	/	/
GO:0097118	neuroligin clustering involved in postsynaptic membrane assembly	biological_process	0.00992577	/	/
GO:0002051	osteoblast fate commitment	biological_process	0.00992577	/	/
GO:0004309	exopolyphosphatase activity	molecular_function	0.0123922	/	/
GO:0030072	peptide hormone secretion	biological_process	0.0123922	/	/
GO:0060561	apoptotic process involved in morphogenesis	biological_process	0.0123922	/	/
GO:0050974	detection of mechanical stimulus involved in sensory perception	biological_process	0.0123922	/	/
GO:0031727	CCR2 chemokine receptor binding	molecular_function	0.0123922	/	/
GO:0098639	collagen binding involved in cell-matrix adhesion	molecular_function	0.0123922	/	/
GO:0004565	beta-galactosidase activity	molecular_function	0.0123922	/	/
GO:0015277	kainate selective glutamate receptor activity	molecular_function	0.0123922	/	/
GO:0033564	anterior/posterior axon guidance	biological_process	0.0123922	/	/
GO:0071866	negative regulation of apoptotic process in bone marrow cell	biological_process	0.0123922	/	/
GO:0033153	T cell receptor V(D)J recombination	biological_process	0.0123922	/	/
GO:0097109	neuroligin family protein binding	molecular_function	0.0123922	/	/
GO:0070695	FHF complex	cellular_component	0.0123922	/	/
GO:0030284	estrogen receptor activity	molecular_function	0.0123922	/	/
GO:1903825	organic acid transmembrane transport	biological_process	0.0123922	/	/
GO:0061035	regulation of cartilage development	biological_process	0.0123922	/	0.0298931
GO:1902262	apoptotic process involved in blood vessel morphogenesis	biological_process	0.0123922	/	/
GO:0006798	polyphosphate catabolic process	biological_process	0.0123922	/	/
GO:0070915	lysophosphatidic acid receptor activity	molecular_function	0.0123922	/	/
GO:0032436	positive regulation of proteasomal ubiquitin-dependent protein catabolic process	biological_process	0.0142307	/	/
GO:0071864	positive regulation of cell proliferation in bone marrow	biological_process	0.0148525	/	/
GO:0045063	T-helper 1 cell differentiation	biological_process	0.0148525	/	/
GO:0002685	regulation of leukocyte migration	biological_process	0.0148525	/	/
GO:0097443	sorting endosome	cellular_component	0.0148525	/	/
GO:0045843	negative regulation of striated muscle tissue development	biological_process	0.0148525	/	0.0298931
GO:0030854	positive regulation of granulocyte differentiation	biological_process	0.0148525	/	/
GO:0042297	vocal learning	biological_process	0.0148525	/	/
GO:0023051	regulation of signaling	biological_process	0.0148525	/	/
GO:0097187	dentinogenesis	biological_process	0.0148525	/	/
GO:0097119	postsynaptic density protein 95 clustering	biological_process	0.0148525	/	/
GO:0060603	mammary gland duct morphogenesis	biological_process	0.0148525	/	/
GO:0070314	G1 to G0 transition	biological_process	0.0148525	/	/
GO:0040036	regulation of fibroblast growth factor receptor signaling pathway	biological_process	0.0148525	/	/
GO:0005125	cytokine activity	molecular_function	0.0151059	/	/
GO:0032713	negative regulation of interleukin-4 production	biological_process	0.0173069	/	/
GO:0042487	regulation of odontogenesis of dentin-containing tooth	biological_process	0.0173069	/	/
GO:0046632	alpha-beta T cell differentiation	biological_process	0.0173069	/	/
GO:0030868	smooth endoplasmic reticulum membrane	cellular_component	0.0173069	/	/
GO:0032488	Cdc42 protein signal transduction	biological_process	0.0173069	/	/
GO:0032696	negative regulation of interleukin-13 production	biological_process	0.0173069	/	/
GO:0032714	negative regulation of interleukin-5 production	biological_process	0.0173069	/	/
GO:0021861	forebrain radial glial cell differentiation	biological_process	0.0173069	/	/
GO:0060710	chorio-allantoic fusion	biological_process	0.0173069	/	/
GO:0071286	cellular response to magnesium ion	biological_process	0.0173069	/	/
GO:0030130	clathrin coat of trans-Golgi network vesicle	cellular_component	0.0173069	/	/
GO:0032051	clathrin light chain binding	molecular_function	0.0173069	/	/
GO:0060541	respiratory system development	biological_process	0.0173069	/	/
GO:0048341	paraxial mesoderm formation	biological_process	0.0173069	/	/
GO:0006685	sphingomyelin catabolic process	biological_process	0.0173069	/	/
GO:0004767	sphingomyelin phosphodiesterase activity	molecular_function	0.0173069	/	/
GO:0008467	[heparan sulfate]-glucosamine 3-sulfotransferase 1 activity	molecular_function	0.0173069	/	/
GO:0051838	cytolysis by host of symbiont cells	biological_process	0.0173069	/	/
GO:0019784	NEDD8-specific protease activity	molecular_function	0.0173069	/	/
GO:0045588	positive regulation of gamma-delta T cell differentiation	biological_process	0.0173069	/	/
GO:0004888	transmembrane signaling receptor activity	molecular_function	0.0187902	/	/
GO:0015824	proline transport	biological_process	0.0197554	/	/
GO:1901522	positive regulation of transcription from RNA polymerase II promoter involved in cellular response to chemical stimulus	biological_process	0.0197554	/	0.0123251
GO:0016462	pyrophosphatase activity	molecular_function	0.0197554	/	/
GO:0006929	substrate-dependent cell migration	biological_process	0.0197554	/	/
GO:0032732	positive regulation of interleukin-1 production	biological_process	0.0197554	/	/
GO:2000617	positive regulation of histone H3-K9 acetylation	biological_process	0.0197554	/	/
GO:0030132	clathrin coat of coated pit	cellular_component	0.0197554	/	/
GO:0071439	clathrin complex	cellular_component	0.0197554	/	/
GO:0045666	positive regulation of neuron differentiation	biological_process	0.0206815	/	/
GO:2000035	regulation of stem cell division	biological_process	0.0221978	/	/
GO:0060732	positive regulation of inositol phosphate biosynthetic process	biological_process	0.0221978	/	/
GO:1904153	negative regulation of retrograde protein transport, ER to cytosol	biological_process	0.0221978	/	/
GO:0006621	protein retention in ER lumen	biological_process	0.0221978	/	/
GO:0097104	postsynaptic membrane assembly	biological_process	0.0221978	/	/
GO:0006930	substrate-dependent cell migration, cell extension	biological_process	0.0246344	/	/
GO:0070016	armadillo repeat domain binding	molecular_function	0.0246344	/	/
GO:0009651	response to salt stress	biological_process	0.0246344	/	/
GO:0140052	cellular response to oxidised low-density lipoprotein particle stimulus	biological_process	0.0246344	/	/
GO:1990907	beta-catenin-TCF complex	cellular_component	0.0246344	/	/
GO:0070268	cornification	biological_process	0.024752	/	/
GO:0005200	structural constituent of cytoskeleton	molecular_function	0.0256977	/	/
GO:0006898	receptor-mediated endocytosis	biological_process	0.0256977	/	/
GO:0085029	extracellular matrix assembly	biological_process	0.027065	/	0.0123251
GO:0042391	regulation of membrane potential	biological_process	0.0281254	/	/
GO:0008381	mechanosensitive ion channel activity	molecular_function	0.0294896	/	/
GO:0045295	gamma-catenin binding	molecular_function	0.0294896	/	/
GO:0043586	tongue development	biological_process	0.0294896	/	/
GO:0042805	actinin binding	molecular_function	0.0294896	/	/
GO:0030897	HOPS complex	cellular_component	0.0294896	/	/
GO:2000304	positive regulation of ceramide biosynthetic process	biological_process	0.0294896	/	/
GO:0000151	ubiquitin ligase complex	cellular_component	0.0306419	/	/
GO:0050982	detection of mechanical stimulus	biological_process	0.0319084	/	/
GO:0008328	ionotropic glutamate receptor complex	cellular_component	0.0319084	/	/
GO:0032963	collagen metabolic process	biological_process	0.0319084	/	/
GO:0022407	regulation of cell-cell adhesion	biological_process	0.0319084	/	/
GO:0060389	pathway-restricted SMAD protein phosphorylation	biological_process	0.0319084	/	/
GO:0031424	keratinization	biological_process	0.0343095	/	/
GO:0015804	neutral amino acid transport	biological_process	0.0343213	/	/
GO:0062009	secondary palate development	biological_process	0.0343213	/	/
GO:0048246	macrophage chemotaxis	biological_process	0.0343213	/	/
GO:0070742	C2H2 zinc finger domain binding	molecular_function	0.0343213	/	/
GO:0034220	ion transmembrane transport	biological_process	0.0359125	/	/
GO:0005160	transforming growth factor beta receptor binding	molecular_function	0.0367284	/	/
GO:0030278	regulation of ossification	biological_process	0.0367284	/	/
GO:1903543	positive regulation of exosomal secretion	biological_process	0.0367284	/	/
GO:0003073	regulation of systemic arterial blood pressure	biological_process	0.0367284	/	/
GO:0045667	regulation of osteoblast differentiation	biological_process	0.0391295	/	/
GO:0071625	vocalization behavior	biological_process	0.0391295	/	/
GO:0008301	DNA binding, bending	molecular_function	0.0391295	/	/
GO:0007097	nuclear migration	biological_process	0.0391295	/	0.040962
GO:0008066	glutamate receptor activity	molecular_function	0.0391295	/	/
GO:0071682	endocytic vesicle lumen	cellular_component	0.0391295	/	/
GO:0000976	transcription regulatory region sequence-specific DNA binding	molecular_function	0.0407085	/	/
GO:0007165	signal transduction	biological_process	0.0409625	/	/
GO:0005882	intermediate filament	cellular_component	0.0409713	/	/
GO:0021542	dentate gyrus development	biological_process	0.0415249	/	/
GO:0005326	neurotransmitter transmembrane transporter activity	molecular_function	0.0415249	/	/
GO:0007158	neuron cell-cell adhesion	biological_process	0.0415249	/	/
GO:1901653	cellular response to peptide	biological_process	0.0415249	/	/
GO:0005328	neurotransmitter:sodium symporter activity	molecular_function	0.0415249	/	/
GO:0043923	positive regulation by host of viral transcription	biological_process	0.0415249	/	/
GO:0050708	regulation of protein secretion	biological_process	0.0415249	/	/
GO:1990837	sequence-specific double-stranded DNA binding	molecular_function	0.0416673	/	/
GO:0004970	ionotropic glutamate receptor activity	molecular_function	0.0439144	/	/
GO:0005242	inward rectifier potassium channel activity	molecular_function	0.0439144	/	/
GO:0030705	cytoskeleton-dependent intracellular transport	biological_process	0.0462981	/	/
GO:2000147	positive regulation of cell motility	biological_process	0.0462981	/	/
GO:0035066	positive regulation of histone acetylation	biological_process	0.0462981	/	/
GO:0031638	zymogen activation	biological_process	0.0462981	/	/
GO:0032924	activin receptor signaling pathway	biological_process	0.0462981	/	/
GO:0030517	negative regulation of axon extension	biological_process	0.0486759	/	/
GO:0000137	Golgi cis cisterna	cellular_component	0.0486759	/	/
GO:0050786	RAGE receptor binding	molecular_function	/	0.00162337	/
GO:0071636	positive regulation of transforming growth factor beta production	biological_process	/	0.00589077	/
GO:0099106	ion channel regulator activity	molecular_function	/	0.00756356	/
GO:0043269	regulation of ion transport	biological_process	/	0.0130302	/
GO:0044224	juxtaparanode region of axon	cellular_component	/	0.0165073	/
GO:0051106	positive regulation of DNA ligation	biological_process	/	0.0165436	/
GO:0002826	negative regulation of T-helper 1 type immune response	biological_process	/	0.0165436	/
GO:0042148	strand invasion	biological_process	/	0.022522	/
GO:1904631	response to glucoside	biological_process	/	0.0226491	/
GO:1900035	negative regulation of cellular response to heat	biological_process	/	0.0226491	/
GO:0046705	CDP biosynthetic process	biological_process	/	0.0226491	/
GO:0099025	anchored component of postsynaptic membrane	cellular_component	/	0.0226491	/
GO:0006225	UDP biosynthetic process	biological_process	/	0.0226491	/
GO:0071971	extracellular exosome assembly	biological_process	/	0.0226491	/
GO:0072254	metanephric glomerular mesangial cell differentiation	biological_process	/	0.0226491	/
GO:0036053	glomerular endothelium fenestra	cellular_component	/	0.0226491	/
GO:0032602	chemokine production	biological_process	/	0.0226491	/
GO:0033028	myeloid cell apoptotic process	biological_process	/	0.0226491	/
GO:0070488	neutrophil aggregation	biological_process	/	0.0226491	/
GO:0035581	sequestering of extracellular ligand from receptor	biological_process	/	0.0226491	/
GO:0072089	stem cell proliferation	biological_process	/	0.0250654	/
GO:0043199	sulfate binding	molecular_function	/	0.0295163	/
GO:0035910	ascending aorta morphogenesis	biological_process	/	0.0295163	/
GO:0048386	positive regulation of retinoic acid receptor signaling pathway	biological_process	/	0.0295163	/
GO:0072344	rescue of stalled ribosome	biological_process	/	0.0295163	/
GO:0043653	mitochondrial fragmentation involved in apoptotic process	biological_process	/	0.0301786	/
GO:0045743	positive regulation of fibroblast growth factor receptor signaling pathway	biological_process	/	0.0301786	/
GO:0060323	head morphogenesis	biological_process	/	0.0301786	/
GO:2000649	regulation of sodium ion transmembrane transporter activity	biological_process	/	0.0309045	/
GO:0033862	UMP kinase activity	molecular_function	/	0.0361537	/
GO:0042488	positive regulation of odontogenesis of dentin-containing tooth	biological_process	/	0.0361537	/
GO:0005035	death receptor activity	molecular_function	/	0.0361537	/
GO:1901898	negative regulation of relaxation of cardiac muscle	biological_process	/	0.0361537	/
GO:0098847	sequence-specific single stranded DNA binding	molecular_function	/	0.0361537	/
GO:0021782	glial cell development	biological_process	/	0.0375173	/
GO:0120183	positive regulation of focal adhesion disassembly	biological_process	/	0.0375173	/
GO:0048935	peripheral nervous system neuron development	biological_process	/	0.0421198	/
GO:0097502	mannosylation	biological_process	/	0.0456665	/
GO:0003289	atrial septum primum morphogenesis	biological_process	/	0.0465035	/
GO:1900748	positive regulation of vascular endothelial growth factor signaling pathway	biological_process	/	0.0465035	/
GO:0045569	TRAIL binding	molecular_function	/	0.0465035	/
GO:0050776	regulation of immune response	biological_process	/	/	1.26655e-05
GO:0031012	extracellular matrix	cellular_component	/	/	1.78047e-05
GO:0048729	tissue morphogenesis	biological_process	/	/	2.63617e-05
GO:0048407	platelet-derived growth factor binding	molecular_function	/	/	8.70208e-05
GO:0007229	integrin-mediated signaling pathway	biological_process	/	/	0.00013592
GO:0001502	cartilage condensation	biological_process	/	/	0.000141643
GO:0062023	collagen-containing extracellular matrix	cellular_component	/	/	0.000183474
GO:0005201	extracellular matrix structural constituent	molecular_function	/	/	0.000491752
GO:0045503	dynein light chain binding	molecular_function	/	/	0.000493055
GO:0010718	positive regulation of epithelial to mesenchymal transition	biological_process	/	/	0.000609131
GO:0030198	extracellular matrix organization	biological_process	/	/	0.000683039
GO:0001957	intramembranous ossification	biological_process	/	/	0.000889677
GO:0005584	collagen type I trimer	cellular_component	/	/	0.000889677
GO:0003413	chondrocyte differentiation involved in endochondral bone morphogenesis	biological_process	/	/	0.000889677
GO:0051216	cartilage development	biological_process	/	/	0.00109263
GO:0005604	basement membrane	cellular_component	/	/	0.00116079
GO:0002020	protease binding	molecular_function	/	/	0.00129355
GO:0045504	dynein heavy chain binding	molecular_function	/	/	0.00132044
GO:0009314	response to radiation	biological_process	/	/	0.00136106
GO:0042060	wound healing	biological_process	/	/	0.00143789
GO:0032967	positive regulation of collagen biosynthetic process	biological_process	/	/	0.00193714
GO:0071560	cellular response to transforming growth factor beta stimulus	biological_process	/	/	0.00205394
GO:0007179	transforming growth factor beta receptor signaling pathway	biological_process	/	/	0.00214511
GO:0007163	establishment or maintenance of cell polarity	biological_process	/	/	0.00258241
GO:0032655	regulation of interleukin-12 production	biological_process	/	/	0.00261631
GO:0032525	somite rostral/caudal axis specification	biological_process	/	/	0.00261631
GO:1905146	lysosomal protein catabolic process	biological_process	/	/	0.00261631
GO:0061448	connective tissue development	biological_process	/	/	0.00261631
GO:0016476	regulation of embryonic cell shape	biological_process	/	/	0.00261631
GO:0050777	negative regulation of immune response	biological_process	/	/	0.00261631
GO:0001763	morphogenesis of a branching structure	biological_process	/	/	0.00261631
GO:0010172	embryonic body morphogenesis	biological_process	/	/	0.00261631
GO:0004177	aminopeptidase activity	molecular_function	/	/	0.00311621
GO:0030199	collagen fibril organization	biological_process	/	/	0.00356195
GO:0019882	antigen processing and presentation	biological_process	/	/	0.00474734
GO:0030021	extracellular matrix structural constituent conferring compression resistance	molecular_function	/	/	0.00474734
GO:0009880	embryonic pattern specification	biological_process	/	/	0.00474734
GO:0045197	establishment or maintenance of epithelial cell apical/basal polarity	biological_process	/	/	0.00474734
GO:0060059	embryonic retina morphogenesis in camera-type eye	biological_process	/	/	0.0051295
GO:0051098	regulation of binding	biological_process	/	/	0.0051295
GO:0060351	cartilage development involved in endochondral bone morphogenesis	biological_process	/	/	0.0051295
GO:0003360	brainstem development	biological_process	/	/	0.0051295
GO:0030056	hemidesmosome	cellular_component	/	/	0.0051295
GO:0005813	centrosome	cellular_component	/	/	0.00519955
GO:0017112	Rab guanyl-nucleotide exchange factor activity	molecular_function	/	/	0.005999
GO:0007492	endoderm development	biological_process	/	/	0.00603676
GO:0010592	positive regulation of lamellipodium assembly	biological_process	/	/	0.00603676
GO:0030031	cell projection assembly	biological_process	/	/	0.00603676
GO:0007605	sensory perception of sound	biological_process	/	/	0.00621947
GO:0071773	cellular response to BMP stimulus	biological_process	/	/	0.00751561
GO:0007224	smoothened signaling pathway	biological_process	/	/	0.00788381
GO:0048705	skeletal system morphogenesis	biological_process	/	/	0.00794405
GO:0030838	positive regulation of actin filament polymerization	biological_process	/	/	0.00794405
GO:0010606	positive regulation of cytoplasmic mRNA processing body assembly	biological_process	/	/	0.00838111
GO:0031063	regulation of histone deacetylation	biological_process	/	/	0.00838111
GO:0006047	UDP-N-acetylglucosamine metabolic process	biological_process	/	/	0.00838111
GO:0001881	receptor recycling	biological_process	/	/	0.00838111
GO:0045053	protein retention in Golgi apparatus	biological_process	/	/	0.00838111
GO:0034340	response to type I interferon	biological_process	/	/	0.00838111
GO:0030020	extracellular matrix structural constituent conferring tensile strength	molecular_function	/	/	0.00905509
GO:0000242	pericentriolar material	cellular_component	/	/	0.00918996
GO:0008092	cytoskeletal protein binding	molecular_function	/	/	0.0105356
GO:0048704	embryonic skeletal system morphogenesis	biological_process	/	/	0.0110648
GO:0043552	positive regulation of phosphatidylinositol 3-kinase activity	biological_process	/	/	0.0110648
GO:0018149	peptide cross-linking	biological_process	/	/	0.0123251
GO:2000573	positive regulation of DNA biosynthetic process	biological_process	/	/	0.0123251
GO:0043589	skin morphogenesis	biological_process	/	/	0.0123251
GO:0051660	establishment of centrosome localization	biological_process	/	/	0.0123251
GO:0021799	cerebral cortex radially oriented cell migration	biological_process	/	/	0.0123251
GO:0005539	glycosaminoglycan binding	molecular_function	/	/	0.0131442
GO:0070006	metalloaminopeptidase activity	molecular_function	/	/	0.0131442
GO:0097730	non-motile cilium	cellular_component	/	/	0.0154312
GO:0043015	gamma-tubulin binding	molecular_function	/	/	0.0154312
GO:0001568	blood vessel development	biological_process	/	/	0.0161171
GO:0071141	SMAD protein complex	cellular_component	/	/	0.0169177
GO:2000601	positive regulation of Arp2/3 complex-mediated actin nucleation	biological_process	/	/	0.0169177
GO:0005540	hyaluronic acid binding	molecular_function	/	/	0.0169177
GO:0006623	protein targeting to vacuole	biological_process	/	/	0.0169177
GO:0030208	dermatan sulfate biosynthetic process	biological_process	/	/	0.0169177
GO:0006956	complement activation	biological_process	/	/	0.0169177
GO:0005856	cytoskeleton	cellular_component	/	/	0.0174018
GO:0008022	protein C-terminus binding	molecular_function	/	/	0.0177741
GO:0001657	ureteric bud development	biological_process	/	/	0.017928
GO:0070830	bicellular tight junction assembly	biological_process	/	/	0.017928
GO:0009612	response to mechanical stimulus	biological_process	/	/	0.0196925
GO:0060325	face morphogenesis	biological_process	/	/	0.020636
GO:0008138	protein tyrosine/serine/threonine phosphatase activity	molecular_function	/	/	0.020636
GO:0006468	protein phosphorylation	biological_process	/	/	0.0219649
GO:0030207	chondroitin sulfate catabolic process	biological_process	/	/	0.0221167
GO:1902041	regulation of extrinsic apoptotic signaling pathway via death domain receptors	biological_process	/	/	0.0221167
GO:0008631	intrinsic apoptotic signaling pathway in response to oxidative stress	biological_process	/	/	0.0221167
GO:0090102	cochlea development	biological_process	/	/	0.0221167
GO:0045589	regulation of regulatory T cell differentiation	biological_process	/	/	0.0221167
GO:0022408	negative regulation of cell-cell adhesion	biological_process	/	/	0.0221167
GO:0060216	definitive hemopoiesis	biological_process	/	/	0.0221167
GO:0030837	negative regulation of actin filament polymerization	biological_process	/	/	0.0221167
GO:0060021	roof of mouth development	biological_process	/	/	0.0237211
GO:0005929	cilium	cellular_component	/	/	0.0242594
GO:0005938	cell cortex	cellular_component	/	/	0.0244451
GO:0060271	cilium assembly	biological_process	/	/	0.0258244
GO:0031252	cell leading edge	cellular_component	/	/	0.0259092
GO:0021702	cerebellar Purkinje cell differentiation	biological_process	/	/	0.0278823
GO:0071732	cellular response to nitric oxide	biological_process	/	/	0.0278823
GO:0030695	GTPase regulator activity	molecular_function	/	/	0.0278823
GO:0016504	peptidase activator activity	molecular_function	/	/	0.0278823
GO:0005671	Ada2/Gcn5/Ada3 transcription activator complex	cellular_component	/	/	0.0278823
GO:0042118	endothelial cell activation	biological_process	/	/	0.0278823
GO:0003279	cardiac septum development	biological_process	/	/	0.0278823
GO:0004535	poly(A)-specific ribonuclease activity	molecular_function	/	/	0.0278823
GO:0006376	mRNA splice site selection	biological_process	/	/	0.0278823
GO:0070411	I-SMAD binding	molecular_function	/	/	0.0278823
GO:0070986	left/right axis specification	biological_process	/	/	0.0278823
GO:0010763	positive regulation of fibroblast migration	biological_process	/	/	0.0278823
GO:0042995	cell projection	cellular_component	/	/	0.0280245
GO:0006508	proteolysis	biological_process	/	/	0.0280872
GO:0019005	SCF ubiquitin ligase complex	cellular_component	/	/	0.0282147
GO:0097016	L27 domain binding	molecular_function	/	/	0.0298931
GO:0034191	apolipoprotein A-I receptor binding	molecular_function	/	/	0.0298931
GO:0008192	RNA guanylyltransferase activity	molecular_function	/	/	0.0298931
GO:0050185	phosphatidylinositol deacylase activity	molecular_function	/	/	0.0298931
GO:1901526	positive regulation of mitophagy	biological_process	/	/	0.0298931
GO:1905574	ganglioside GM2 binding	molecular_function	/	/	0.0298931
GO:0003251	positive regulation of cell proliferation involved in heart valve morphogenesis	biological_process	/	/	0.0298931
GO:1905634	regulation of protein localization to chromatin	biological_process	/	/	0.0298931
GO:0060661	submandibular salivary gland formation	biological_process	/	/	0.0298931
GO:0032423	regulation of mismatch repair	biological_process	/	/	0.0298931
GO:0032280	symmetric synapse	cellular_component	/	/	0.0298931
GO:0007509	mesoderm migration involved in gastrulation	biological_process	/	/	0.0298931
GO:1901740	negative regulation of myoblast fusion	biological_process	/	/	0.0298931
GO:0060751	branch elongation involved in mammary gland duct branching	biological_process	/	/	0.0298931
GO:0021830	interneuron migration from the subpallium to the cortex	biological_process	/	/	0.0298931
GO:0061141	lung ciliated cell differentiation	biological_process	/	/	0.0298931
GO:0035470	positive regulation of vascular wound healing	biological_process	/	/	0.0298931
GO:0001100	negative regulation of exit from mitosis	biological_process	/	/	0.0298931
GO:0000096	sulfur amino acid metabolic process	biological_process	/	/	0.0298931
GO:0003069	acetylcholine-mediated vasodilation involved in regulation of systemic arterial blood pressure	biological_process	/	/	0.0298931
GO:0072133	metanephric mesenchyme morphogenesis	biological_process	/	/	0.0298931
GO:0033686	positive regulation of luteinizing hormone secretion	biological_process	/	/	0.0298931
GO:0060689	cell differentiation involved in salivary gland development	biological_process	/	/	0.0298931
GO:1903845	negative regulation of cellular response to transforming growth factor beta stimulus	biological_process	/	/	0.0298931
GO:0021902	commitment of neuronal cell to specific neuron type in forebrain	biological_process	/	/	0.0298931
GO:0019482	beta-alanine metabolic process	biological_process	/	/	0.0298931
GO:0008705	methionine synthase activity	molecular_function	/	/	0.0298931
GO:1902595	regulation of DNA replication origin binding	biological_process	/	/	0.0298931
GO:1990876	cytoplasmic side of nuclear pore	cellular_component	/	/	0.0298931
GO:0001865	NK T cell differentiation	biological_process	/	/	0.0298931
GO:1905575	ganglioside GM3 binding	molecular_function	/	/	0.0298931
GO:0070208	protein heterotrimerization	biological_process	/	/	0.0298931
GO:1901256	regulation of macrophage colony-stimulating factor production	biological_process	/	/	0.0298931
GO:0060452	positive regulation of cardiac muscle contraction	biological_process	/	/	0.0298931
GO:1903764	regulation of potassium ion export across plasma membrane	biological_process	/	/	0.0298931
GO:0030432	peristalsis	biological_process	/	/	0.0298931
GO:0045066	regulatory T cell differentiation	biological_process	/	/	0.0298931
GO:0003335	corneocyte development	biological_process	/	/	0.0298931
GO:0014008	positive regulation of microglia differentiation	biological_process	/	/	0.0298931
GO:0043041	amino acid activation for nonribosomal peptide biosynthetic process	biological_process	/	/	0.0298931
GO:0004906	interferon-gamma receptor activity	molecular_function	/	/	0.0298931
GO:0006678	glucosylceramide metabolic process	biological_process	/	/	0.0298931
GO:0045175	basal protein localization	biological_process	/	/	0.0298931
GO:0042558	pteridine-containing compound metabolic process	biological_process	/	/	0.0298931
GO:0060022	hard palate development	biological_process	/	/	0.0298931
GO:0072134	nephrogenic mesenchyme morphogenesis	biological_process	/	/	0.0298931
GO:1990188	euchromatin binding	molecular_function	/	/	0.0298931
GO:1903286	regulation of potassium ion import	biological_process	/	/	0.0298931
GO:0005586	collagen type III trimer	cellular_component	/	/	0.0298931
GO:0031673	H zone	cellular_component	/	/	0.0298931
GO:0045547	dehydrodolichyl diphosphate synthase activity	molecular_function	/	/	0.0298931
GO:0097541	axonemal basal plate	cellular_component	/	/	0.0298931
GO:0005585	collagen type II trimer	cellular_component	/	/	0.0298931
GO:0004484	mRNA guanylyltransferase activity	molecular_function	/	/	0.0298931
GO:0070841	inclusion body assembly	biological_process	/	/	0.0298931
GO:0009817	defense response to fungus, incompatible interaction	biological_process	/	/	0.0298931
GO:0032667	regulation of interleukin-23 production	biological_process	/	/	0.0298931
GO:0048319	axial mesoderm morphogenesis	biological_process	/	/	0.0298931
GO:0034039	8-oxo-7,8-dihydroguanine DNA N-glycosylase activity	molecular_function	/	/	0.0298931
GO:1905932	positive regulation of vascular smooth muscle cell differentiation involved in phenotypic switching	biological_process	/	/	0.0298931
GO:0008488	gamma-glutamyl carboxylase activity	molecular_function	/	/	0.0298931
GO:1905305	negative regulation of cardiac myofibril assembly	biological_process	/	/	0.0298931
GO:0031021	interphase microtubule organizing center	cellular_component	/	/	0.0298931
GO:0034736	cholesterol O-acyltransferase activity	molecular_function	/	/	0.0298931
GO:1905576	ganglioside GT1b binding	molecular_function	/	/	0.0298931
GO:0001315	age-dependent response to reactive oxygen species	biological_process	/	/	0.0298931
GO:0015662	ion transmembrane transporter activity, phosphorylative mechanism	molecular_function	/	/	0.0298931
GO:0005579	membrane attack complex	cellular_component	/	/	0.0298931
GO:1903893	positive regulation of ATF6-mediated unfolded protein response	biological_process	/	/	0.0298931
GO:0061040	female gonad morphogenesis	biological_process	/	/	0.0298931
GO:1905653	positive regulation of artery morphogenesis	biological_process	/	/	0.0298931
GO:0033269	internode region of axon	cellular_component	/	/	0.0298931
GO:1905577	ganglioside GP1c binding	molecular_function	/	/	0.0298931
GO:0003829	beta-1,3-galactosyl-O-glycosyl-glycoprotein beta-1,6-N-acetylglucosaminyltransferase activity	molecular_function	/	/	0.0298931
GO:0061181	regulation of chondrocyte development	biological_process	/	/	0.0298931
GO:0003844	1,4-alpha-glucan branching enzyme activity	molecular_function	/	/	0.0298931
GO:0071638	negative regulation of monocyte chemotactic protein-1 production	biological_process	/	/	0.0298931
GO:1904906	positive regulation of endothelial cell-matrix adhesion via fibronectin	biological_process	/	/	0.0298931
GO:0030882	lipid antigen binding	molecular_function	/	/	0.0298931
GO:0042482	positive regulation of odontogenesis	biological_process	/	/	0.0298931
GO:0019075	virus maturation	biological_process	/	/	0.0298931
GO:0032943	mononuclear cell proliferation	biological_process	/	/	0.0298931
GO:0002094	polyprenyltransferase activity	molecular_function	/	/	0.0298931
GO:0102752	1,4-alpha-glucan branching enzyme activity (using a glucosylated glycogenin as primer for glycogen synthesis)	molecular_function	/	/	0.0298931
GO:1904423	dehydrodolichyl diphosphate synthase complex	cellular_component	/	/	0.0298931
GO:0002369	T cell cytokine production	biological_process	/	/	0.0298931
GO:0034021	response to silicon dioxide	biological_process	/	/	0.0298931
GO:0045007	depurination	biological_process	/	/	0.0298931
GO:0120043	stereocilium shaft	cellular_component	/	/	0.0298931
GO:0071691	cardiac muscle thin filament assembly	biological_process	/	/	0.0298931
GO:0070197	meiotic attachment of telomere to nuclear envelope	biological_process	/	/	0.0298931
GO:0014866	skeletal myofibril assembly	biological_process	/	/	0.0298931
GO:0021871	forebrain regionalization	biological_process	/	/	0.0298931
GO:0060272	embryonic skeletal joint morphogenesis	biological_process	/	/	0.0298931
GO:0072537	fibroblast activation	biological_process	/	/	0.0298931
GO:0048773	erythrophore differentiation	biological_process	/	/	0.0298931
GO:1905572	ganglioside GM1 transport to membrane	biological_process	/	/	0.0298931
GO:0008534	oxidized purine nucleobase lesion DNA N-glycosylase activity	molecular_function	/	/	0.0298931
GO:0005176	ErbB-2 class receptor binding	molecular_function	/	/	0.0298931
GO:0034505	tooth mineralization	biological_process	/	/	0.0298931
GO:2001198	regulation of dendritic cell differentiation	biological_process	/	/	0.0298931
GO:0003331	positive regulation of extracellular matrix constituent secretion	biological_process	/	/	0.0298931
GO:0002081	outer acrosomal membrane	cellular_component	/	/	0.0298931
GO:0051101	regulation of DNA binding	biological_process	/	/	0.0298931
GO:0002486	antigen processing and presentation of endogenous peptide antigen via MHC class I via ER pathway, TAP-independent	biological_process	/	/	0.0298931
GO:0099645	neurotransmitter receptor localization to postsynaptic specialization membrane	biological_process	/	/	0.0298931
GO:0004983	neuropeptide Y receptor activity	molecular_function	/	/	0.0298931
GO:0090461	glutamate homeostasis	biological_process	/	/	0.0298931
GO:0050355	triphosphatase activity	molecular_function	/	/	0.0298931
GO:0002460	adaptive immune response based on somatic recombination of immune receptors built from immunoglobulin superfamily domains	biological_process	/	/	0.0298931
GO:0010760	negative regulation of macrophage chemotaxis	biological_process	/	/	0.0298931
GO:0097500	receptor localization to non-motile cilium	biological_process	/	/	0.0298931
GO:0010603	regulation of cytoplasmic mRNA processing body assembly	biological_process	/	/	0.0298931
GO:2001202	negative regulation of transforming growth factor-beta secretion	biological_process	/	/	0.0298931
GO:0048859	formation of anatomical boundary	biological_process	/	/	0.0298931
GO:0070646	protein modification by small protein removal	biological_process	/	/	0.0298931
GO:0031251	PAN complex	cellular_component	/	/	0.0298931
GO:0046881	positive regulation of follicle-stimulating hormone secretion	biological_process	/	/	0.0298931
GO:0090219	negative regulation of lipid kinase activity	biological_process	/	/	0.0298931
GO:0070445	regulation of oligodendrocyte progenitor proliferation	biological_process	/	/	0.0298931
GO:0048332	mesoderm morphogenesis	biological_process	/	/	0.0298931
GO:1905573	ganglioside GM1 binding	molecular_function	/	/	0.0298931
GO:2001106	regulation of Rho guanyl-nucleotide exchange factor activity	biological_process	/	/	0.0298931
GO:0034059	response to anoxia	biological_process	/	/	0.0298931
GO:2000209	regulation of anoikis	biological_process	/	/	0.0298931
GO:1905313	transforming growth factor beta receptor signaling pathway involved in heart development	biological_process	/	/	0.0298931
GO:0016094	polyprenol biosynthetic process	biological_process	/	/	0.0298931
GO:0021740	principal sensory nucleus of trigeminal nerve development	biological_process	/	/	0.0298931
GO:1905143	eukaryotic translation initiation factor 2 complex assembly	biological_process	/	/	0.0298931
GO:0031536	positive regulation of exit from mitosis	biological_process	/	/	0.0298931
GO:0006931	substrate-dependent cell migration, cell attachment to substrate	biological_process	/	/	0.0298931
GO:0045655	regulation of monocyte differentiation	biological_process	/	/	0.0298931
GO:1903944	negative regulation of hepatocyte apoptotic process	biological_process	/	/	0.0298931
GO:0045187	regulation of circadian sleep/wake cycle, sleep	biological_process	/	/	0.0298931
GO:0010878	cholesterol storage	biological_process	/	/	0.0298931
GO:2000795	negative regulation of epithelial cell proliferation involved in lung morphogenesis	biological_process	/	/	0.0298931
GO:0099013	neuronal dense core vesicle lumen	cellular_component	/	/	0.0298931
GO:0046977	TAP binding	molecular_function	/	/	0.0298931
GO:0070202	regulation of establishment of protein localization to chromosome	biological_process	/	/	0.0298931
GO:1902850	microtubule cytoskeleton organization involved in mitosis	biological_process	/	/	0.0298931
GO:0010869	regulation of receptor biosynthetic process	biological_process	/	/	0.0298931
GO:0044300	cerebellar mossy fiber	cellular_component	/	/	0.0298931
GO:1902618	cellular response to fluoride	biological_process	/	/	0.0298931
GO:0001306	age-dependent response to oxidative stress	biological_process	/	/	0.0298931
GO:1901291	negative regulation of double-strand break repair via single-strand annealing	biological_process	/	/	0.0298931
GO:0032651	regulation of interleukin-1 beta production	biological_process	/	/	0.0298931
GO:0016404	15-hydroxyprostaglandin dehydrogenase (NAD+) activity	molecular_function	/	/	0.0298931
GO:1903760	regulation of voltage-gated potassium channel activity involved in ventricular cardiac muscle cell action potential repolarization	biological_process	/	/	0.0298931
GO:0001839	neural plate morphogenesis	biological_process	/	/	0.0298931
GO:0006543	glutamine catabolic process	biological_process	/	/	0.0298931
GO:0007227	signal transduction downstream of smoothened	biological_process	/	/	0.0298931
GO:0004772	sterol O-acyltransferase activity	molecular_function	/	/	0.0298931
GO:0048010	vascular endothelial growth factor receptor signaling pathway	biological_process	/	/	0.0306387
GO:0072686	mitotic spindle	cellular_component	/	/	0.0309125
GO:0038096	Fc-gamma receptor signaling pathway involved in phagocytosis	biological_process	/	/	0.0331819
GO:0060333	interferon-gamma-mediated signaling pathway	biological_process	/	/	0.0335844
GO:0004896	cytokine receptor activity	molecular_function	/	/	0.0335844
GO:0005049	nuclear export signal receptor activity	molecular_function	/	/	0.0341762
GO:0017119	Golgi transport complex	cellular_component	/	/	0.0341762
GO:0071556	integral component of lumenal side of endoplasmic reticulum membrane	cellular_component	/	/	0.0341762
GO:0022904	respiratory electron transport chain	biological_process	/	/	0.0341762
GO:0008637	apoptotic mitochondrial changes	biological_process	/	/	0.0341762
GO:0010569	regulation of double-strand break repair via homologous recombination	biological_process	/	/	0.0341762
GO:0007018	microtubule-based movement	biological_process	/	/	0.0358448
GO:0071944	cell periphery	cellular_component	/	/	0.0358448
GO:0008233	peptidase activity	molecular_function	/	/	0.035976
GO:0035556	intracellular signal transduction	biological_process	/	/	0.0375767
GO:0005615	extracellular space	cellular_component	/	/	0.0381834
GO:0010613	positive regulation of cardiac muscle hypertrophy	biological_process	/	/	0.040962
GO:0010575	positive regulation of vascular endothelial growth factor production	biological_process	/	/	0.040962
GO:0051571	positive regulation of histone H3-K4 methylation	biological_process	/	/	0.040962
GO:0051298	centrosome duplication	biological_process	/	/	0.040962
GO:0005086	ARF guanyl-nucleotide exchange factor activity	molecular_function	/	/	0.040962
GO:0007498	mesoderm development	biological_process	/	/	0.040962
GO:0030099	myeloid cell differentiation	biological_process	/	/	0.040962
GO:0043394	proteoglycan binding	molecular_function	/	/	0.040962
GO:0005521	lamin binding	molecular_function	/	/	0.040962
GO:0045104	intermediate filament cytoskeleton organization	biological_process	/	/	0.040962
GO:0055093	response to hyperoxia	biological_process	/	/	0.040962
GO:0004672	protein kinase activity	molecular_function	/	/	0.0434212
GO:0005581	collagen trimer	cellular_component	/	/	0.0445555
GO:0004721	phosphoprotein phosphatase activity	molecular_function	/	/	0.0453967
GO:0050680	negative regulation of epithelial cell proliferation	biological_process	/	/	0.045485
GO:0007507	heart development	biological_process	/	/	0.0471715
GO:0045766	positive regulation of angiogenesis	biological_process	/	/	0.0476998
GO:1904837	beta-catenin-TCF complex assembly	biological_process	/	/	0.048205
GO:0005868	cytoplasmic dynein complex	cellular_component	/	/	0.048205
GO:0048589	developmental growth	biological_process	/	/	0.048205
GO:0006895	Golgi to endosome transport	biological_process	/	/	0.048205
GO:0008585	female gonad development	biological_process	/	/	0.048205
GO:0030111	regulation of Wnt signaling pathway	biological_process	/	/	0.048205
GO:0050853	B cell receptor signaling pathway	biological_process	/	/	0.048205
GO:0035902	response to immobilization stress	biological_process	/	/	0.048205
GO:0098839	postsynaptic density membrane	cellular_component	/	/	0.048205
GO:0045664	regulation of neuron differentiation	biological_process	/	/	0.048205
GO:0140326	ATPase-coupled intramembrane lipid transporter activity	molecular_function	/	/	0.048205
GO:0035735	intraciliary transport involved in cilium assembly	biological_process	/	/	0.0498566
