# Supplementary material for: Whole-Transcriptome Sequencing of Knee Joint Cartilage from Kashin–Beck Disease and Osteoarthritis Patients
Source: Int J Mol Sci. 2024 Apr 15;25(8):4348. doi: 10.3390/ijms25084348 (PMC11049856; doi:10.3390/ijms25084348)
Supplement: Supplementary file 1 [file ijms-25-04348-s001.zip › Supplementary Table S11.xlsx]

## Sheet: KEGG
Supplementary Table S11. KEGG enrichment analysis results of differentially expressed mRNAs, IncRNAs and cricRNAs between KBD and OA
pathway_id	pathway_name	pvalue
		mRNA	lncRNA	circRNA
ko04961	Endocrine and other factor-regulated calcium reabsorption	0.000394909	/	/
ko05412	Arrhythmogenic right ventricular cardiomyopathy (ARVC)	0.0209471	/	/
ko04520	Adherens junction	0.0209471	/	/
ko04350	TGF-beta signaling pathway	0.0310838	/	/
ko04928	Parathyroid hormone synthesis, secretion and action	0.0427877	/	/
ko04933	AGE-RAGE signaling pathway in diabetic complications	/	/	5.13831e-06
ko05165	Human papillomavirus infection	/	/	0.00126025
ko05146	Amoebiasis	/	/	0.00197677
