# Supplementary material for: Whole-Transcriptome Sequencing of Knee Joint Cartilage from Kashin–Beck Disease and Osteoarthritis Patients
Source: Int J Mol Sci. 2024 Apr 15;25(8):4348. doi: 10.3390/ijms25084348 (PMC11049856; doi:10.3390/ijms25084348)
Supplement: Supplementary file 1 [file ijms-25-04348-s001.zip › Supplementary Table S12_KBDVSOA_lncRNA_targetPrediction_diff.xlsx]

## Sheet: Sheet1
Supplementary Table S12. Predicted results of the interaction between differentially expressed lncRNA and mRNA in KBD and OA
mRNA							Differentiall expression						lncRNA							Differentiall expression		function
transcript_name	class_code	chr	start	end	gene_id	gene_name	Significant	GO	KEGG	KO_ENTRY	EC	Description	transcript_name	class_code	chr	start	end	gene_id	gene_name	Significant	Known/novel	cis/trans	cis location	trans energy	Pearson Correlation Coefficient
ENST00000591295	0	chr17	44191805	44196079	MSTRG.93270	ATXN7L3	yes	GO:0000124(SAGA complex);GO:0003713(transcription coactivator activity);GO:0005515(protein binding);GO:0005634(nucleus);GO:0006325(chromatin organization);GO:0008270(zinc ion binding);GO:0010390(histone monoubiquitination);GO:0016578(histone deubiquitination);GO:0030374(nuclear receptor transcription coactivator activity);GO:0045893(positive regulation of transcription, DNA-templated);GO:0046872(…	NA	K11363	NA	ataxin 7 like 3 [Source:HGNC Symbol;Acc:HGNC:25416]	ENST00000667107	0	chr17	44176437	44186723	MSTRG.93264	ASB16-AS1	yes	known	cis	100K	NA	-0.128668
ENST00000538716	0	chr17	44186972	44192023	MSTRG.93269	TMUB2	yes	GO:0005515(protein binding);GO:0016020(membrane);GO:0016021(integral component of membrane);GO:0030433(ubiquitin-dependent ERAD pathway)	NA	NA	NA	transmembrane and ubiquitin like domain containing 2 [Source:HGNC Symbol;Acc:HGNC:28459]	ENST00000667107	0	chr17	44176437	44186723	MSTRG.93264	ASB16-AS1	yes	known	cis	100K	NA	0.234795
ENST00000397708	0	chr21	46235133	46286418	MSTRG.134394	MCM3AP	yes	GO:0002376(immune system process);GO:0003676(nucleic acid binding);GO:0003682(chromatin binding);GO:0004402(histone acetyltransferase activity);GO:0005515(protein binding);GO:0005634(nucleus);GO:0005635(nuclear envelope);GO:0005643(nuclear pore);GO:0005654(nucleoplasm);GO:0005694(chromosome);GO:0005737(cytoplasm);GO:0005829(cytosol);GO:0006406(mRNA export from nucleus);GO:0010484(H3 histone acety…	NA	NA	NA	minichromosome maintenance complex component 3 associated protein [Source:HGNC Symbol;Acc:HGNC:6946]	ENST00000670190	0	chr21	46229229	46246292	MSTRG.134393	MCM3AP-AS1	yes	known	cis	10K	NA	-0.0588235
ENST00000619795	0	chr9	35099776	35103195	MSTRG.218635	STOML2	yes	GO:0001772(immunological synapse);GO:0005102(signaling receptor binding);GO:0005515(protein binding);GO:0005737(cytoplasm);GO:0005739(mitochondrion);GO:0005743(mitochondrial inner membrane);GO:0005758(mitochondrial intermembrane space);GO:0005856(cytoskeleton);GO:0005886(plasma membrane);GO:0006851(mitochondrial calcium ion transmembrane transport);GO:0006874(cellular calcium ion homeostasis);GO:…	NA	NA	NA	stomatin like 2 [Source:HGNC Symbol;Acc:HGNC:14559]	ENST00000668332	0	chr9	35023840	35037060	MSTRG.218573	AL355377	yes	known	cis	100K	NA	-0.0588235
ENST00000548985	0	chr12	50112237	50120654	MSTRG.55287	COX14	yes	GO:0005515(protein binding);GO:0005739(mitochondrion);GO:0016020(membrane);GO:0016021(integral component of membrane);GO:0031966(mitochondrial membrane);GO:0033617(mitochondrial respiratory chain complex IV assembly)	04714(Thermogenesis)	K18181	NA	cytochrome c oxidase assembly factor COX14 [Source:HGNC Symbol;Acc:HGNC:28216]	ENST00000548468	0	chr12	50112197	50165880	MSTRG.55287	AC074032	yes	known	cis	1K	NA	-0.0394088
ENST00000645866	0	chr5	75372598	75511638	MSTRG.171433	CERT1	yes	GO:0000902(cell morphogenesis);GO:0001701(in utero embryonic development);GO:0003007(heart morphogenesis);GO:0005515(protein binding);GO:0005581(collagen trimer);GO:0005654(nucleoplasm);GO:0005737(cytoplasm);GO:0005739(mitochondrion);GO:0005783(endoplasmic reticulum);GO:0005789(endoplasmic reticulum membrane);GO:0005794(Golgi apparatus);GO:0005829(cytosol);GO:0006672(ceramide metabolic process);G…	NA	K08283	NA	ceramide transporter 1 [Source:HGNC Symbol;Acc:HGNC:2205]	ENST00000607296	0	chr5	75363760	75364242	MSTRG.171434	AC008897	yes	known	cis	10K	NA	-0.0880336
ENST00000642556	0	chr5	75372331	75511638	MSTRG.171433	CERT1	yes	GO:0000902(cell morphogenesis);GO:0001701(in utero embryonic development);GO:0003007(heart morphogenesis);GO:0005515(protein binding);GO:0005581(collagen trimer);GO:0005654(nucleoplasm);GO:0005737(cytoplasm);GO:0005739(mitochondrion);GO:0005783(endoplasmic reticulum);GO:0005789(endoplasmic reticulum membrane);GO:0005794(Golgi apparatus);GO:0005829(cytosol);GO:0006672(ceramide metabolic process);G…	NA	K08283	NA	ceramide transporter 1 [Source:HGNC Symbol;Acc:HGNC:2205]	ENST00000607296	0	chr5	75363760	75364242	MSTRG.171434	AC008897	yes	known	cis	10K	NA	-0.158735
ENST00000396504	0	chr22	41525804	41544489	MSTRG.136903	POLR3H	yes	GO:0002376(immune system process);GO:0003677(DNA binding);GO:0003899(DNA-directed 5'-3' RNA polymerase activity);GO:0005515(protein binding);GO:0005634(nucleus);GO:0005654(nucleoplasm);GO:0005666(RNA polymerase III complex);GO:0005813(centrosome);GO:0005829(cytosol);GO:0006139(nucleobase-containing compound metabolic process);GO:0006351(transcription, DNA-templated);GO:0006383(transcription by RN…	03020(RNA polymerase);04623(Cytosolic DNA-sensing pathway)	K03022	NA	RNA polymerase III subunit H [Source:HGNC Symbol;Acc:HGNC:30349]	MSTRG.136915.3	o	chr22	41598038	41600892	MSTRG.136915	DESI1	yes	novel	cis	100K	NA	0.372197
ENST00000595158	0	chr19	18571882	18577002	MSTRG.104224	UBA52	yes	GO:0000122(negative regulation of transcription by RNA polymerase II);GO:0000184(nuclear-transcribed mRNA catabolic process, nonsense-mediated decay);GO:0000187(activation of MAPK activity);GO:0000209(protein polyubiquitination);GO:0000715(nucleotide-excision repair, DNA damage recognition);GO:0000717(nucleotide-excision repair, DNA duplex unwinding);GO:0002755(MyD88-dependent toll-like receptor …	03010(Ribosome)	K02927	NA	ubiquitin A-52 residue ribosomal protein fusion product 1 [Source:HGNC Symbol;Acc:HGNC:12458]	MSTRG.104203.3	i	chr19	18500350	18520693	MSTRG.104203	ELL	yes	novel	cis	100K	NA	-0.0743129
ENST00000596304	0	chr19	18571730	18577002	MSTRG.104224	UBA52	yes	GO:0000122(negative regulation of transcription by RNA polymerase II);GO:0000184(nuclear-transcribed mRNA catabolic process, nonsense-mediated decay);GO:0000187(activation of MAPK activity);GO:0000209(protein polyubiquitination);GO:0000715(nucleotide-excision repair, DNA damage recognition);GO:0000717(nucleotide-excision repair, DNA duplex unwinding);GO:0002755(MyD88-dependent toll-like receptor …	03010(Ribosome)	K02927	NA	ubiquitin A-52 residue ribosomal protein fusion product 1 [Source:HGNC Symbol;Acc:HGNC:12458]	MSTRG.104203.3	i	chr19	18500350	18520693	MSTRG.104203	ELL	yes	novel	cis	100K	NA	-0.0588235
ENST00000596273	0	chr19	18571855	18577002	MSTRG.104224	UBA52	yes	GO:0000122(negative regulation of transcription by RNA polymerase II);GO:0000184(nuclear-transcribed mRNA catabolic process, nonsense-mediated decay);GO:0000187(activation of MAPK activity);GO:0000209(protein polyubiquitination);GO:0000715(nucleotide-excision repair, DNA damage recognition);GO:0000717(nucleotide-excision repair, DNA duplex unwinding);GO:0002755(MyD88-dependent toll-like receptor …	03010(Ribosome)	K02927	NA	ubiquitin A-52 residue ribosomal protein fusion product 1 [Source:HGNC Symbol;Acc:HGNC:12458]	MSTRG.104203.3	i	chr19	18500350	18520693	MSTRG.104203	ELL	yes	novel	cis	100K	NA	-0.0588235
ENST00000330233	0	chr14	105486317	105488794	MSTRG.76191	CRIP1	yes	GO:0005737(cytoplasm);GO:0006955(immune response);GO:0007507(heart development);GO:0008270(zinc ion binding);GO:0008630(intrinsic apoptotic signaling pathway in response to DNA damage);GO:0010033(response to organic substance);GO:0010043(response to zinc ion);GO:0010468(regulation of gene expression);GO:0042277(peptide binding);GO:0046872(metal ion binding);GO:0060741(prostate gland stromal morph…	NA	NA	NA	cysteine rich protein 1 [Source:HGNC Symbol;Acc:HGNC:2360]	MSTRG.76167.1	u	chr14	105552838	105553126	MSTRG.76167	.	yes	novel	cis	100K	NA	-0.0710645
ENST00000474141	0	chr7	100148912	100154212	MSTRG.200382	LAMTOR4	yes	GO:0005085(guanyl-nucleotide exchange factor activity);GO:0005515(protein binding);GO:0005764(lysosome);GO:0005765(lysosomal membrane);GO:0007050(cell cycle arrest);GO:0008361(regulation of cell size);GO:0016241(regulation of macroautophagy);GO:0032008(positive regulation of TOR signaling);GO:0043231(intracellular membrane-bounded organelle);GO:0060090(molecular adaptor activity);GO:0061462(prote…	04150(mTOR signaling pathway)	K20399	NA	late endosomal/lysosomal adaptor, MAPK and MTOR activator 4 [Source:HGNC Symbol;Acc:HGNC:33772]	MSTRG.200382.9	j	chr7	100149004	100154212	MSTRG.200382	LAMTOR4	yes	novel	cis	1K	NA	-0.0588235
ENST00000452041	0	chr7	100107078	100119416	MSTRG.200369	TAF6	yes	GO:0000124(SAGA complex);GO:0003677(DNA binding);GO:0003713(transcription coactivator activity);GO:0005515(protein binding);GO:0005634(nucleus);GO:0005654(nucleoplasm);GO:0005669(transcription factor TFIID complex);GO:0005829(cytosol);GO:0006325(chromatin organization);GO:0006352(DNA-templated transcription, initiation);GO:0006357(regulation of transcription by RNA polymerase II);GO:0006366(trans…	03022(Basal transcription factors)	K03131	NA	TATA-box binding protein associated factor 6 [Source:HGNC Symbol;Acc:HGNC:11540]	MSTRG.200382.9	j	chr7	100149004	100154212	MSTRG.200382	LAMTOR4	yes	novel	cis	100K	NA	-0.0588235
ENST00000437822	0	chr7	100107168	100119841	MSTRG.200369	TAF6	yes	GO:0000124(SAGA complex);GO:0003677(DNA binding);GO:0003713(transcription coactivator activity);GO:0005515(protein binding);GO:0005634(nucleus);GO:0005654(nucleoplasm);GO:0005669(transcription factor TFIID complex);GO:0005829(cytosol);GO:0006325(chromatin organization);GO:0006352(DNA-templated transcription, initiation);GO:0006357(regulation of transcription by RNA polymerase II);GO:0006366(trans…	03022(Basal transcription factors)	K03131	NA	TATA-box binding protein associated factor 6 [Source:HGNC Symbol;Acc:HGNC:11540]	MSTRG.200382.9	j	chr7	100149004	100154212	MSTRG.200382	LAMTOR4	yes	novel	cis	100K	NA	-0.0588235
ENST00000355803	0	chr16	1308880	1327095	MSTRG.82781	UBE2I	yes	GO:0000122(negative regulation of transcription by RNA polymerase II);GO:0000166(nucleotide binding);GO:0000795(synaptonemal complex);GO:0001221(transcription cofactor binding);GO:0003723(RNA binding);GO:0005515(protein binding);GO:0005524(ATP binding);GO:0005634(nucleus);GO:0005635(nuclear envelope);GO:0005654(nucleoplasm);GO:0005737(cytoplasm);GO:0005829(cytosol);GO:0006464(cellular protein mod…	03013(RNA transport);04064(NF-kappa B signaling pathway);04120(Ubiquitin mediated proteolysis);05206(MicroRNAs in cancer)	K10577	NA	ubiquitin conjugating enzyme E2 I [Source:HGNC Symbol;Acc:HGNC:12485]	MSTRG.82780.3	o	chr16	1307444	1309413	MSTRG.82780	AC120498	yes	novel	cis	10K	NA	-0.0551736
ENST00000530866	0	chr11	65539411	65559208	MSTRG.45872	LTBP3	yes	GO:0001501(skeletal system development);GO:0005509(calcium ion binding);GO:0005576(extracellular region);GO:0007179(transforming growth factor beta receptor signaling pathway);GO:0019838(growth factor binding);GO:0030502(negative regulation of bone mineralization);GO:0032331(negative regulation of chondrocyte differentiation);GO:0036363(transforming growth factor beta activation);GO:0045780(posit…	NA	K08023	NA	latent transforming growth factor beta binding protein 3 [Source:HGNC Symbol;Acc:HGNC:6716]	MSTRG.45867.16	j	chr11	65502729	65506516	MSTRG.45867	MALAT1	yes	novel	cis	100K	NA	-0.0588235
ENST00000324210	0	chr3	152268963	152466565	MSTRG.148693	MBNL1	yes	GO:0000381(regulation of alternative mRNA splicing, via spliceosome);GO:0001069(regulatory region RNA binding);GO:0001701(in utero embryonic development);GO:0003723(RNA binding);GO:0003725(double-stranded RNA binding);GO:0005515(protein binding);GO:0005634(nucleus);GO:0005654(nucleoplasm);GO:0005737(cytoplasm);GO:0005829(cytosol);GO:0006397(mRNA processing);GO:0007399(nervous system development);…	NA	K14943	NA	muscleblind like splicing regulator 1 [Source:HGNC Symbol;Acc:HGNC:6923]	MSTRG.148699.2	i	chr3	152353782	152390130	MSTRG.148699	MBNL1	yes	novel	cis	100K	NA	-0.0759132
ENST00000396504	0	chr22	41525804	41544489	MSTRG.136903	POLR3H	yes	GO:0002376(immune system process);GO:0003677(DNA binding);GO:0003899(DNA-directed 5'-3' RNA polymerase activity);GO:0005515(protein binding);GO:0005634(nucleus);GO:0005654(nucleoplasm);GO:0005666(RNA polymerase III complex);GO:0005813(centrosome);GO:0005829(cytosol);GO:0006139(nucleobase-containing compound metabolic process);GO:0006351(transcription, DNA-templated);GO:0006383(transcription by RN…	03020(RNA polymerase);04623(Cytosolic DNA-sensing pathway)	K03022	NA	RNA polymerase III subunit H [Source:HGNC Symbol;Acc:HGNC:30349]	MSTRG.136915.4	o	chr22	41598527	41600892	MSTRG.136915	DESI1	yes	novel	cis	100K	NA	-0.0798031
ENST00000584461	0	chr17	81868260	81871608	MSTRG.96294	ARHGDIA	yes	GO:0001772(immunological synapse);GO:0005094(Rho GDP-dissociation inhibitor activity);GO:0005096(GTPase activator activity);GO:0005504(fatty acid binding);GO:0005515(protein binding);GO:0005615(extracellular space);GO:0005634(nucleus);GO:0005737(cytoplasm);GO:0005829(cytosol);GO:0005856(cytoskeleton);GO:0007162(negative regulation of cell adhesion);GO:0007266(Rho protein signal transduction);GO:0…	04722(Neurotrophin signaling pathway);04962(Vasopressin-regulated water reabsorption)	NA	NA	Rho GDP dissociation inhibitor alpha [Source:HGNC Symbol;Acc:HGNC:678]	MSTRG.96313.2	u	chr17	81881594	81882425	MSTRG.96313	.	yes	novel	cis	100K	NA	-0.112938
ENST00000612333	0	chr6	10747759	10758834	MSTRG.180412	TMEM14B	yes	GO:0005515(protein binding);GO:0005743(mitochondrial inner membrane);GO:0006839(mitochondrial transport);GO:0007275(multicellular organism development);GO:0007399(nervous system development);GO:0016020(membrane);GO:0016021(integral component of membrane);GO:0021987(cerebral cortex development);GO:0031966(mitochondrial membrane);GO:0042802(identical protein binding);GO:0061351(neural precursor cel…	NA	NA	NA	transmembrane protein 14B [Source:HGNC Symbol;Acc:HGNC:21384]	MSTRG.180412.2	j	chr6	10723070	10758834	MSTRG.180412	TMEM14B	yes	novel	cis	100K	NA	-0.0610524
ENST00000536370	0	chr6	10762725	10838553	MSTRG.180417	MAK	yes	GO:0000165(MAPK cascade);GO:0000166(nucleotide binding);GO:0001750(photoreceptor outer segment);GO:0001917(photoreceptor inner segment);GO:0003713(transcription coactivator activity);GO:0004672(protein kinase activity);GO:0004674(protein serine/threonine kinase activity);GO:0004707(MAP kinase activity);GO:0005515(protein binding);GO:0005524(ATP binding);GO:0005634(nucleus);GO:0005737(cytoplasm);G…	NA	K08829	EC:2.7.11.22	male germ cell associated kinase [Source:HGNC Symbol;Acc:HGNC:6816]	MSTRG.180412.2	j	chr6	10723070	10758834	MSTRG.180412	TMEM14B	yes	novel	cis	100K	NA	-0.0606376
ENST00000521569	0	chr5	151666477	151687054	MSTRG.177331	SPARC	yes	GO:0001503(ossification);GO:0001937(negative regulation of endothelial cell proliferation);GO:0002576(platelet degranulation);GO:0005201(extracellular matrix structural constituent);GO:0005509(calcium ion binding);GO:0005515(protein binding);GO:0005518(collagen binding);GO:0005576(extracellular region);GO:0005604(basement membrane);GO:0005615(extracellular space);GO:0005634(nucleus);GO:0005737(cy…	NA	NA	NA	secreted protein acidic and cysteine rich [Source:HGNC Symbol;Acc:HGNC:11219]	MSTRG.177342.1	j	chr5	151741071	151758779	MSTRG.177342	ATOX1	yes	novel	cis	100K	NA	-0.0824279
ENST00000620366	0	chr5	176346065	176361807	MSTRG.179183	KIAA1191	yes	GO:0003674(molecular_function);GO:0005515(protein binding);GO:0005575(cellular_component);GO:0005737(cytoplasm);GO:0008150(biological_process);GO:0016491(oxidoreductase activity);GO:0055114(oxidation-reduction process)	NA	NA	NA	KIAA1191 [Source:HGNC Symbol;Acc:HGNC:29209]	MSTRG.179199.1	o	chr5	176443703	176481817	MSTRG.179199	FAF2	yes	novel	cis	100K	NA	-0.0956372
ENST00000368733	0	chr1	153390032	153391073	MSTRG.23345	S100A8	yes	GO:0001816(cytokine production);GO:0002224(toll-like receptor signaling pathway);GO:0002376(immune system process);GO:0002523(leukocyte migration involved in inflammatory response);GO:0002526(acute inflammatory response);GO:0002544(chronic inflammatory response);GO:0002793(positive regulation of peptide secretion);GO:0005509(calcium ion binding);GO:0005515(protein binding);GO:0005576(extracellula…	04657(IL-17 signaling pathway)	K21127	NA	S100 calcium binding protein A8 [Source:HGNC Symbol;Acc:HGNC:10498]	MSTRG.23340.1	u	chr1	153367980	153368192	MSTRG.23340	.	yes	novel	cis	100K	NA	-0.0728157
ENST00000368732	0	chr1	153390032	153391040	MSTRG.23345	S100A8	yes	GO:0001816(cytokine production);GO:0002224(toll-like receptor signaling pathway);GO:0002376(immune system process);GO:0002523(leukocyte migration involved in inflammatory response);GO:0002526(acute inflammatory response);GO:0002544(chronic inflammatory response);GO:0002793(positive regulation of peptide secretion);GO:0005509(calcium ion binding);GO:0005515(protein binding);GO:0005576(extracellula…	04657(IL-17 signaling pathway)	K21127	NA	S100 calcium binding protein A8 [Source:HGNC Symbol;Acc:HGNC:10498]	MSTRG.23340.1	u	chr1	153367980	153368192	MSTRG.23340	.	yes	novel	cis	100K	NA	-0.0938245
ENST00000518825	0	chr5	138781923	138935457	MSTRG.176168	CTNNA1	yes	GO:0001541(ovarian follicle development);GO:0001669(acrosomal vesicle);GO:0003723(RNA binding);GO:0005198(structural molecule activity);GO:0005515(protein binding);GO:0005737(cytoplasm);GO:0005829(cytosol);GO:0005856(cytoskeleton);GO:0005886(plasma membrane);GO:0005911(cell-cell junction);GO:0005912(adherens junction);GO:0005915(zonula adherens);GO:0005925(focal adhesion);GO:0007155(cell adhesion…	04390(Hippo signaling pathway);04520(Adherens junction);04670(Leukocyte transendothelial migration);05100(Bacterial invasion of epithelial cells);05200(Pathways in cancer);05213(Endometrial cancer);05226(Gastric cancer);05412(Arrhythmogenic right ventricular cardiomyopathy (ARVC))	K05691	NA	catenin alpha 1 [Source:HGNC Symbol;Acc:HGNC:2509]	MSTRG.176181.4	i	chr5	138776100	138777875	MSTRG.176181	CTNNA1	yes	novel	cis	10K	NA	-0.0743933
ENST00000342788	0	chr2	211375717	212538841	MSTRG.123920	ERBB4	yes	GO:0000165(MAPK cascade);GO:0000166(nucleotide binding);GO:0000976(transcription regulatory region sequence-specific DNA binding);GO:0001755(neural crest cell migration);GO:0001934(positive regulation of protein phosphorylation);GO:0004672(protein kinase activity);GO:0004713(protein tyrosine kinase activity);GO:0004714(transmembrane receptor protein tyrosine kinase activity);GO:0005154(epidermal …	04010(MAPK signaling pathway);04012(ErbB signaling pathway);04020(Calcium signaling pathway);04151(PI3K-Akt signaling pathway);05205(Proteoglycans in cancer)	K05085	EC:2.7.10.1	erb-b2 receptor tyrosine kinase 4 [Source:HGNC Symbol;Acc:HGNC:3432]	MSTRG.123900.1	u	chr2	211310036	211310985	MSTRG.123900	.	yes	novel	cis	100K	NA	0.31475
ENST00000330233	0	chr14	105486317	105488794	MSTRG.76191	CRIP1	yes	GO:0005737(cytoplasm);GO:0006955(immune response);GO:0007507(heart development);GO:0008270(zinc ion binding);GO:0008630(intrinsic apoptotic signaling pathway in response to DNA damage);GO:0010033(response to organic substance);GO:0010043(response to zinc ion);GO:0010468(regulation of gene expression);GO:0042277(peptide binding);GO:0046872(metal ion binding);GO:0060741(prostate gland stromal morph…	NA	NA	NA	cysteine rich protein 1 [Source:HGNC Symbol;Acc:HGNC:2360]	MSTRG.76168.1	u	chr14	105553521	105553782	MSTRG.76168	.	yes	novel	cis	100K	NA	-0.0710356
ENST00000242576	0	chr12	109097597	109110992	MSTRG.60096	UNG	yes	GO:0003684(damaged DNA binding);GO:0004844(uracil DNA N-glycosylase activity);GO:0005515(protein binding);GO:0005634(nucleus);GO:0005654(nucleoplasm);GO:0005739(mitochondrion);GO:0006281(DNA repair);GO:0006284(base-excision repair);GO:0006974(cellular response to DNA damage stimulus);GO:0016032(viral process);GO:0016446(somatic hypermutation of immunoglobulin genes);GO:0016447(somatic recombinati…	03410(Base excision repair);05340(Primary immunodeficiency)	K03648	EC:3.2.2.27	uracil DNA glycosylase [Source:HGNC Symbol;Acc:HGNC:12572]	MSTRG.60063.1	i	chr12	109019131	109019827	MSTRG.60063	SVOP	yes	novel	cis	100K	NA	-0.0965048
ENST00000392472	0	chr3	187234084	187292022	MSTRG.151098	MASP1	yes	GO:0001867(complement activation, lectin pathway);GO:0002376(immune system process);GO:0004252(serine-type endopeptidase activity);GO:0005509(calcium ion binding);GO:0005515(protein binding);GO:0005576(extracellular region);GO:0005615(extracellular space);GO:0005654(nucleoplasm);GO:0005829(cytosol);GO:0006508(proteolysis);GO:0006898(receptor-mediated endocytosis);GO:0006956(complement activation)…	04610(Complement and coagulation cascades);05150(Staphylococcus aureus infection)	K03992	EC:3.4.21.-	mannan binding lectin serine peptidase 1 [Source:HGNC Symbol;Acc:HGNC:6901]	MSTRG.151086.1	u	chr3	187304213	187304458	MSTRG.151086	.	yes	novel	cis	100K	NA	-0.0866708
ENST00000622947	0	chr5	141094606	141098703	MSTRG.176391	PCDHB2	yes	GO:0005509(calcium ion binding);GO:0005886(plasma membrane);GO:0005887(integral component of plasma membrane);GO:0007155(cell adhesion);GO:0007156(homophilic cell adhesion via plasma membrane adhesion molecules);GO:0007268(chemical synaptic transmission);GO:0007399(nervous system development);GO:0007416(synapse assembly);GO:0016020(membrane);GO:0016021(integral component of membrane);GO:0016339(c…	NA	K16494	NA	protocadherin beta 2 [Source:HGNC Symbol;Acc:HGNC:8687]	MSTRG.176351.1	u	chr5	141027750	141028231	MSTRG.176351	.	yes	novel	cis	100K	NA	-0.0927772
ENST00000534378	0	chr19	15115016	15125786	MSTRG.103832	ILVBL	yes	GO:0000287(magnesium ion binding);GO:0001561(fatty acid alpha-oxidation);GO:0003674(molecular_function);GO:0003824(catalytic activity);GO:0003984(acetolactate synthase activity);GO:0005515(protein binding);GO:0005783(endoplasmic reticulum);GO:0005789(endoplasmic reticulum membrane);GO:0005948(acetolactate synthase complex);GO:0006629(lipid metabolic process);GO:0006631(fatty acid metabolic proces…	NA	K11259	EC:2.2.1.-	ilvB acetolactate synthase like [Source:HGNC Symbol;Acc:HGNC:6041]	MSTRG.103828.1	u	chr19	15144753	15145021	MSTRG.103828	.	yes	novel	cis	100K	NA	-0.062722
ENST00000609336	0	chr20	50795031	50882676	MSTRG.130146	BCAS4	yes	GO:0005737(cytoplasm);GO:0031083(BLOC-1 complex)	NA	K08366	NA	breast carcinoma amplified sequence 4 [Source:HGNC Symbol;Acc:HGNC:14367]	MSTRG.130096.1	u	chr20	50712628	50713307	MSTRG.130096	.	yes	novel	cis	100K	NA	-0.0588235
ENST00000409761	0	chr7	24573415	24688686	MSTRG.194916	MPP6	yes	GO:0005515(protein binding);GO:0005886(plasma membrane);GO:0016020(membrane);GO:0065003(protein-containing complex assembly);GO:0070062(extracellular exosome)	NA	NA	NA	membrane palmitoylated protein 6 [Source:HGNC Symbol;Acc:HGNC:18167]	MSTRG.194910.1	u	chr7	24564574	24565057	MSTRG.194910	.	yes	novel	cis	10K	NA	-0.0603991
ENST00000256733	0	chr11	18245240	18248668	MSTRG.42426	SAA2	yes	GO:0005515(protein binding);GO:0005576(extracellular region);GO:0006953(acute-phase response);GO:0034364(high-density lipoprotein particle);GO:0070062(extracellular exosome)	NA	K17310	NA	serum amyloid A2 [Source:HGNC Symbol;Acc:HGNC:10514]	MSTRG.42410.1	i	chr11	18212450	18212726	MSTRG.42410	SLC25A51P4	yes	novel	cis	100K	NA	-0.0588235
ENST00000414546	0	chr11	18239223	18248668	MSTRG.42426	SAA2	yes	GO:0005515(protein binding);GO:0005576(extracellular region);GO:0006953(acute-phase response);GO:0034364(high-density lipoprotein particle);GO:0070062(extracellular exosome)	NA	K17310	NA	serum amyloid A2 [Source:HGNC Symbol;Acc:HGNC:10514]	MSTRG.42410.1	i	chr11	18212450	18212726	MSTRG.42410	SLC25A51P4	yes	novel	cis	100K	NA	-0.0588235
ENST00000395069	0	chr12	49347038	49352143	MSTRG.55167	DNAJC22	yes	GO:0005515(protein binding);GO:0016020(membrane);GO:0016021(integral component of membrane)	NA	K19370	NA	DnaJ heat shock protein family (Hsp40) member C22 [Source:HGNC Symbol;Acc:HGNC:25802]	MSTRG.55211.1	i	chr12	49313731	49313949	MSTRG.55211	AC125611	yes	novel	cis	100K	NA	-0.0588235
ENST00000439986	0	chr18	59430939	59697469	MSTRG.100402	CCBE1	yes	GO:0001525(angiogenesis);GO:0001945(lymph vessel development);GO:0001946(lymphangiogenesis);GO:0002020(protease binding);GO:0002040(sprouting angiogenesis);GO:0003016(respiratory system process);GO:0005509(calcium ion binding);GO:0005515(protein binding);GO:0005518(collagen binding);GO:0005576(extracellular region);GO:0005581(collagen trimer);GO:0005615(extracellular space);GO:0007275(multicellul…	NA	K19638	NA	collagen and calcium binding EGF domains 1 [Source:HGNC Symbol;Acc:HGNC:29426]	MSTRG.100404.1	i	chr18	59475301	59475635	MSTRG.100404	CCBE1	yes	novel	cis	100K	NA	-0.0588235
ENST00000350198	0	chr2	101697703	101894689	MSTRG.115729	MAP4K4	yes	GO:0000166(nucleotide binding);GO:0001953(negative regulation of cell-matrix adhesion);GO:0004111(creatine kinase activity);GO:0004672(protein kinase activity);GO:0004674(protein serine/threonine kinase activity);GO:0005515(protein binding);GO:0005524(ATP binding);GO:0005737(cytoplasm);GO:0005925(focal adhesion);GO:0006468(protein phosphorylation);GO:0008017(microtubule binding);GO:0010977(negati…	04010(MAPK signaling pathway)	K04407	EC:2.7.11.1	mitogen-activated protein kinase kinase kinase kinase 4 [Source:HGNC Symbol;Acc:HGNC:6866]	MSTRG.115730.2	i	chr2	101727656	101750457	MSTRG.115730	MAP4K4	yes	novel	cis	100K	NA	-0.0588426
ENST00000428064	0	chr2	108534456	108673029	MSTRG.116236	LIMS1	yes	GO:0005515(protein binding);GO:0005737(cytoplasm);GO:0005829(cytosol);GO:0005886(plasma membrane);GO:0005911(cell-cell junction);GO:0005925(focal adhesion);GO:0007569(cell aging);GO:0008270(zinc ion binding);GO:0010628(positive regulation of gene expression);GO:0010811(positive regulation of cell-substrate adhesion);GO:0016020(membrane);GO:0019901(protein kinase binding);GO:0030054(cell junction)…	NA	NA	NA	LIM zinc finger domain containing 1 [Source:HGNC Symbol;Acc:HGNC:6616]	MSTRG.116241.2	i	chr2	108552593	108603496	MSTRG.116241	LIMS1	yes	novel	cis	100K	NA	-0.106546
ENST00000429635	0	chr12	47076600	47080093	MSTRG.54939	AMIGO2	yes	GO:0005515(protein binding);GO:0005634(nucleus);GO:0005886(plasma membrane);GO:0007155(cell adhesion);GO:0007156(homophilic cell adhesion via plasma membrane adhesion molecules);GO:0007157(heterophilic cell-cell adhesion via plasma membrane cell adhesion molecules);GO:0007420(brain development);GO:0016020(membrane);GO:0016021(integral component of membrane);GO:0043066(negative regulation of apopt…	NA	K22529	NA	adhesion molecule with Ig like domain 2 [Source:HGNC Symbol;Acc:HGNC:24073]	MSTRG.54851.1	u	chr12	47045374	47046012	MSTRG.54851	.	yes	novel	cis	100K	NA	-0.0588235
ENST00000652233	0	chr4	151120310	151228033	MSTRG.163379	SH3D19	yes	GO:0005515(protein binding);GO:0005634(nucleus);GO:0005654(nucleoplasm);GO:0005737(cytoplasm);GO:0005829(cytosol);GO:0005886(plasma membrane);GO:0007010(cytoskeleton organization);GO:0022604(regulation of cell morphogenesis);GO:0051044(positive regulation of membrane protein ectodomain proteolysis)	NA	NA	NA	SH3 domain containing 19 [Source:HGNC Symbol;Acc:HGNC:30418]	MSTRG.163380.2	i	chr4	151105133	151116220	MSTRG.163380	SH3D19	yes	novel	cis	100K	NA	0.998657
ENST00000374145	0	chr1	26788177	26800659	MSTRG.14410	PIGV	yes	GO:0000009(alpha-1,6-mannosyltransferase activity);GO:0000030(mannosyltransferase activity);GO:0004376(glycolipid mannosyltransferase activity);GO:0004584(dolichyl-phosphate-mannose-glycolipid alpha-mannosyltransferase activity);GO:0005783(endoplasmic reticulum);GO:0005789(endoplasmic reticulum membrane);GO:0006506(GPI anchor biosynthetic process);GO:0016020(membrane);GO:0016021(integral componen…	00563(Glycosylphosphatidylinositol (GPI)-anchor biosynthesis)	K07542	EC:2.4.1.-	phosphatidylinositol glycan anchor biosynthesis class V [Source:HGNC Symbol;Acc:HGNC:26031]	MSTRG.14414.3	i	chr1	26709720	26726494	MSTRG.14414	ARID1A	yes	novel	cis	100K	NA	-0.104411
ENST00000368600	0	chr1	153968243	153974361	MSTRG.23463	CREB3L4	yes	GO:0000139(Golgi membrane);GO:0000790(nuclear chromatin);GO:0000977(RNA polymerase II regulatory region sequence-specific DNA binding);GO:0000981(DNA-binding transcription factor activity, RNA polymerase II-specific);GO:0001228(DNA-binding transcription activator activity, RNA polymerase II-specific);GO:0003677(DNA binding);GO:0003700(DNA-binding transcription factor activity);GO:0005515(protein …	04022(cGMP-PKG signaling pathway);04024(cAMP signaling pathway);04151(PI3K-Akt signaling pathway);04152(AMPK signaling pathway);04211(Longevity regulating pathway);04261(Adrenergic signaling in cardiomyocytes);04668(TNF signaling pathway);04714(Thermogenesis);04725(Cholinergic synapse);04728(Dopaminergic synapse);04911(Insulin secretion);04915(Estrogen signaling pathway);04916(Melanogenesis);0491…	K09048	NA	cAMP responsive element binding protein 3 like 4 [Source:HGNC Symbol;Acc:HGNC:18854]	MSTRG.23467.2	o	chr1	153992385	153994577	MSTRG.23467	NUP210L	yes	novel	cis	100K	NA	-0.0920016
ENST00000638323	0	chr16	1153241	1221809	MSTRG.82773	CACNA1H	yes	GO:0001518(voltage-gated sodium channel complex);GO:0005216(ion channel activity);GO:0005244(voltage-gated ion channel activity);GO:0005245(voltage-gated calcium channel activity);GO:0005248(voltage-gated sodium channel activity);GO:0005261(cation channel activity);GO:0005262(calcium channel activity);GO:0005515(protein binding);GO:0005886(plasma membrane);GO:0005887(integral component of plasma …	04010(MAPK signaling pathway);04020(Calcium signaling pathway);04713(Circadian entrainment);04925(Aldosterone synthesis and secretion);04927(Cortisol synthesis and secretion);04934(Cushing syndrome)	NA	NA	calcium voltage-gated channel subunit alpha1 H [Source:HGNC Symbol;Acc:HGNC:1395]	MSTRG.82757.1	u	chr16	1151421	1151761	MSTRG.82757	.	yes	novel	cis	10K	NA	-0.0705394
ENST00000565831	0	chr16	1153738	1221809	MSTRG.82773	CACNA1H	yes	GO:0001518(voltage-gated sodium channel complex);GO:0005216(ion channel activity);GO:0005244(voltage-gated ion channel activity);GO:0005245(voltage-gated calcium channel activity);GO:0005248(voltage-gated sodium channel activity);GO:0005261(cation channel activity);GO:0005262(calcium channel activity);GO:0005515(protein binding);GO:0005886(plasma membrane);GO:0005887(integral component of plasma …	04010(MAPK signaling pathway);04020(Calcium signaling pathway);04713(Circadian entrainment);04925(Aldosterone synthesis and secretion);04927(Cortisol synthesis and secretion);04934(Cushing syndrome)	NA	NA	calcium voltage-gated channel subunit alpha1 H [Source:HGNC Symbol;Acc:HGNC:1395]	MSTRG.82757.1	u	chr16	1151421	1151761	MSTRG.82757	.	yes	novel	cis	10K	NA	-0.0588235
ENST00000402092	0	chr2	241315928	241354027	MSTRG.126260	SEPTIN2	yes	GO:0000145(exocyst);GO:0000166(nucleotide binding);GO:0000775(chromosome, centromeric region);GO:0000776(kinetochore);GO:0000777(condensed chromosome kinetochore);GO:0003924(GTPase activity);GO:0005515(protein binding);GO:0005525(GTP binding);GO:0005634(nucleus);GO:0005654(nucleoplasm);GO:0005694(chromosome);GO:0005737(cytoplasm);GO:0005819(spindle);GO:0005856(cytoskeleton);GO:0005886(plasma memb…	05100(Bacterial invasion of epithelial cells)	K16942	NA	septin 2 [Source:HGNC Symbol;Acc:HGNC:7729]	MSTRG.126259.3	i	chr2	241281229	241290659	MSTRG.126259	HDLBP	yes	novel	cis	100K	NA	-0.0995432
ENST00000518825	0	chr5	138781923	138935457	MSTRG.176168	CTNNA1	yes	GO:0001541(ovarian follicle development);GO:0001669(acrosomal vesicle);GO:0003723(RNA binding);GO:0005198(structural molecule activity);GO:0005515(protein binding);GO:0005737(cytoplasm);GO:0005829(cytosol);GO:0005856(cytoskeleton);GO:0005886(plasma membrane);GO:0005911(cell-cell junction);GO:0005912(adherens junction);GO:0005915(zonula adherens);GO:0005925(focal adhesion);GO:0007155(cell adhesion…	04390(Hippo signaling pathway);04520(Adherens junction);04670(Leukocyte transendothelial migration);05100(Bacterial invasion of epithelial cells);05200(Pathways in cancer);05213(Endometrial cancer);05226(Gastric cancer);05412(Arrhythmogenic right ventricular cardiomyopathy (ARVC))	K05691	NA	catenin alpha 1 [Source:HGNC Symbol;Acc:HGNC:2509]	MSTRG.176181.5	i	chr5	138776103	138777875	MSTRG.176181	CTNNA1	yes	novel	cis	10K	NA	-0.0668185
ENST00000261034	0	chr3	112562072	112585579	MSTRG.145487	SLC35A5	yes	GO:0000139(Golgi membrane);GO:0005515(protein binding);GO:0005794(Golgi apparatus);GO:0008643(carbohydrate transport);GO:0015165(pyrimidine nucleotide-sugar transmembrane transporter activity);GO:0016020(membrane);GO:0016021(integral component of membrane);GO:0030173(integral component of Golgi membrane);GO:0090481(pyrimidine nucleotide-sugar transmembrane transport)	NA	K15274	NA	solute carrier family 35 member A5 [Source:HGNC Symbol;Acc:HGNC:20792]	MSTRG.145483.5	j	chr3	112499379	112562046	MSTRG.145483	ATG3	yes	novel	cis	100K	NA	-0.0588235
ENST00000361175	0	chr10	87659613	87747874	MSTRG.37403	PAPSS2	yes	GO:0000103(sulfate assimilation);GO:0000166(nucleotide binding);GO:0001501(skeletal system development);GO:0003824(catalytic activity);GO:0004020(adenylylsulfate kinase activity);GO:0004781(sulfate adenylyltransferase (ATP) activity);GO:0005515(protein binding);GO:0005524(ATP binding);GO:0005829(cytosol);GO:0007596(blood coagulation);GO:0008152(metabolic process);GO:0016301(kinase activity);GO:00…	00230(Purine metabolism);00450(Selenocompound metabolism);00920(Sulfur metabolism)	K13811	2.7.1.25;EC:2.7.7.4	3'-phosphoadenosine 5'-phosphosulfate synthase 2 [Source:HGNC Symbol;Acc:HGNC:8604]	MSTRG.37410.2	i	chr10	87689833	87701197	MSTRG.37410	PAPSS2	yes	novel	cis	100K	NA	-0.0877321
ENST00000394353	0	chr9	121286123	121332843	MSTRG.223641	GSN	yes	GO:0001726(ruffle);GO:0002102(podosome);GO:0003779(actin binding);GO:0005509(calcium ion binding);GO:0005515(protein binding);GO:0005546(phosphatidylinositol-4,5-bisphosphate binding);GO:0005576(extracellular region);GO:0005615(extracellular space);GO:0005634(nucleus);GO:0005737(cytoplasm);GO:0005829(cytosol);GO:0005856(cytoskeleton);GO:0005886(plasma membrane);GO:0005925(focal adhesion);GO:00069…	04666(Fc gamma R-mediated phagocytosis);04810(Regulation of actin cytoskeleton);05203(Viral carcinogenesis)	K05768	NA	gelsolin [Source:HGNC Symbol;Acc:HGNC:4620]	MSTRG.223645.1	i	chr9	121297896	121299782	MSTRG.223645	GSN	yes	novel	cis	100K	NA	0.242628
ENST00000419333	0	chr3	196229842	196270541	MSTRG.151764	PCYT1A	yes	GO:0003824(catalytic activity);GO:0004105(choline-phosphate cytidylyltransferase activity);GO:0005515(protein binding);GO:0005516(calmodulin binding);GO:0005635(nuclear envelope);GO:0005737(cytoplasm);GO:0005783(endoplasmic reticulum);GO:0005789(endoplasmic reticulum membrane);GO:0005829(cytosol);GO:0005886(plasma membrane);GO:0006629(lipid metabolic process);GO:0006656(phosphatidylcholine biosyn…	00440(Phosphonate and phosphinate metabolism);00564(Glycerophospholipid metabolism);05231(Choline metabolism in cancer)	NA	NA	phosphate cytidylyltransferase 1, choline, alpha [Source:HGNC Symbol;Acc:HGNC:8754]	MSTRG.151736.1	u	chr3	196173978	196174585	MSTRG.151736	.	yes	novel	cis	100K	NA	-0.0669696
ENST00000585922	0	chr17	41812695	41818278	MSTRG.93006	FKBP10	yes	GO:0000413(protein peptidyl-prolyl isomerization);GO:0001701(in utero embryonic development);GO:0003755(peptidyl-prolyl cis-trans isomerase activity);GO:0005509(calcium ion binding);GO:0005528(FK506 binding);GO:0005758(mitochondrial intermembrane space);GO:0005783(endoplasmic reticulum);GO:0005788(endoplasmic reticulum lumen);GO:0016020(membrane);GO:0016853(isomerase activity);GO:0017185(peptidyl…	NA	K09575	EC:5.2.1.8	FKBP prolyl isomerase 10 [Source:HGNC Symbol;Acc:HGNC:18169]	MSTRG.93009.1	i	chr17	41837033	41837411	MSTRG.93009	KLHL10	yes	novel	cis	100K	NA	-0.0692553
ENST00000396249	0	chr14	39114306	39136973	MSTRG.70704	GEMIN2	yes	GO:0000245(spliceosomal complex assembly);GO:0000375(RNA splicing, via transesterification reactions);GO:0000387(spliceosomal snRNP assembly);GO:0005515(protein binding);GO:0005634(nucleus);GO:0005654(nucleoplasm);GO:0005681(spliceosomal complex);GO:0005730(nucleolus);GO:0005737(cytoplasm);GO:0005829(cytosol);GO:0006397(mRNA processing);GO:0008380(RNA splicing);GO:0016604(nuclear body);GO:0032797…	03013(RNA transport)	NA	NA	gem nuclear organelle associated protein 2 [Source:HGNC Symbol;Acc:HGNC:10884]	MSTRG.70714.6	j	chr14	39150186	39170532	MSTRG.70714	TRAPPC6B	yes	novel	cis	100K	NA	0.362998
ENST00000560890	0	chr15	63276018	63309362	MSTRG.79663	APH1B	yes	GO:0004175(endopeptidase activity);GO:0005515(protein binding);GO:0005783(endoplasmic reticulum);GO:0005886(plasma membrane);GO:0005887(integral component of plasma membrane);GO:0007219(Notch signaling pathway);GO:0007220(Notch receptor processing);GO:0007626(locomotory behavior);GO:0008233(peptidase activity);GO:0010008(endosome membrane);GO:0016020(membrane);GO:0016021(integral component of mem…	04330(Notch signaling pathway);05010(Alzheimer disease)	K06172	NA	aph-1 homolog B, gamma-secretase subunit [Source:HGNC Symbol;Acc:HGNC:24080]	MSTRG.79660.1	i	chr15	63257786	63258418	MSTRG.79660	RAB8B	yes	novel	cis	100K	NA	-0.0198802
ENST00000469762	0	chr3	160399650	160434954	MSTRG.149193	SMC4	yes	GO:0000070(mitotic sister chromatid segregation);GO:0000166(nucleotide binding);GO:0000775(chromosome, centromeric region);GO:0000796(condensin complex);GO:0000797(condensin core heterodimer);GO:0000799(nuclear condensin complex);GO:0003697(single-stranded DNA binding);GO:0005515(protein binding);GO:0005524(ATP binding);GO:0005634(nucleus);GO:0005654(nucleoplasm);GO:0005694(chromosome);GO:0005737…	NA	NA	NA	structural maintenance of chromosomes 4 [Source:HGNC Symbol;Acc:HGNC:14013]	MSTRG.149150.1	u	chr3	160489078	160489470	MSTRG.149150	.	yes	novel	cis	100K	NA	-0.195139
ENST00000293618	0	chr12	50400809	50480004	MSTRG.55327	LARP4	yes	GO:0003676(nucleic acid binding);GO:0003723(RNA binding);GO:0005515(protein binding);GO:0005737(cytoplasm);GO:0005829(cytosol);GO:0005844(polysome);GO:0006412(translation);GO:0007010(cytoskeleton organization);GO:0008143(poly(A) binding);GO:0010494(cytoplasmic stress granule);GO:0016020(membrane);GO:0022604(regulation of cell morphogenesis);GO:0022627(cytosolic small ribosomal subunit);GO:0045727…	NA	K18763	NA	La ribonucleoprotein 4 [Source:HGNC Symbol;Acc:HGNC:24320]	MSTRG.55331.1	i	chr12	50430694	50431283	MSTRG.55331	LARP4	yes	novel	cis	100K	NA	-0.111164
ENST00000311637	0	chr20	51596514	51768656	MSTRG.130200	ATP9A	yes	GO:0000166(nucleotide binding);GO:0000287(magnesium ion binding);GO:0002020(protease binding);GO:0005524(ATP binding);GO:0005768(endosome);GO:0005769(early endosome);GO:0005794(Golgi apparatus);GO:0005802(trans-Golgi network);GO:0005886(plasma membrane);GO:0006890(retrograde vesicle-mediated transport, Golgi to endoplasmic reticulum);GO:0006897(endocytosis);GO:0015914(phospholipid transport);GO:0…	NA	K01530	EC:7.6.2.1	ATPase phospholipid transporting 9A (putative) [Source:HGNC Symbol;Acc:HGNC:13540]	MSTRG.130181.1	x	chr20	51542755	51562578	MSTRG.130181	NFATC2	yes	novel	cis	100K	NA	-0.185577
ENST00000594975	0	chr19	16361889	16472085	MSTRG.103970	EPS15L1	yes	GO:0005509(calcium ion binding);GO:0005515(protein binding);GO:0005634(nucleus);GO:0005829(cytosol);GO:0005886(plasma membrane);GO:0005905(clathrin-coated pit);GO:0006897(endocytosis);GO:0016020(membrane);GO:0016197(endosomal transport);GO:0030132(clathrin coat of coated pit);GO:0042059(negative regulation of epidermal growth factor receptor signaling pathway);GO:0045296(cadherin binding);GO:0046…	04144(Endocytosis)	K12472	NA	epidermal growth factor receptor pathway substrate 15 like 1 [Source:HGNC Symbol;Acc:HGNC:24634]	MSTRG.103959.1	i	chr19	16311645	16312212	MSTRG.103959	AC020911	yes	novel	cis	100K	NA	-0.0604405
ENST00000642416	0	chr1	27534661	27604431	MSTRG.14534	AHDC1	yes	GO:0003677(DNA binding)	NA	K22592	NA	AT-hook DNA binding motif containing 1 [Source:HGNC Symbol;Acc:HGNC:25230]	MSTRG.14531.1	u	chr1	27512675	27513323	MSTRG.14531	.	yes	novel	cis	100K	NA	-0.0998648
ENST00000404814	0	chr14	94378389	94390693	MSTRG.75180	SERPINA1	yes	GO:0000139(Golgi membrane);GO:0002020(protease binding);GO:0002576(platelet degranulation);GO:0004867(serine-type endopeptidase inhibitor activity);GO:0005515(protein binding);GO:0005576(extracellular region);GO:0005615(extracellular space);GO:0005783(endoplasmic reticulum);GO:0005788(endoplasmic reticulum lumen);GO:0005794(Golgi apparatus);GO:0006888(endoplasmic reticulum to Golgi vesicle-mediat…	04610(Complement and coagulation cascades)	K03984	NA	serpin family A member 1 [Source:HGNC Symbol;Acc:HGNC:8941]	MSTRG.75154.1	u	chr14	94345986	94346189	MSTRG.75154	.	yes	novel	cis	100K	NA	-0.0243687
ENST00000529690	0	chr8	109574653	109608075	MSTRG.213533	SYBU	yes	GO:0000139(Golgi membrane);GO:0005515(protein binding);GO:0005737(cytoplasm);GO:0005794(Golgi apparatus);GO:0005856(cytoskeleton);GO:0005874(microtubule);GO:0005881(cytoplasmic microtubule);GO:0008017(microtubule binding);GO:0016020(membrane);GO:0016021(integral component of membrane);GO:0017075(syntaxin-1 binding);GO:0019894(kinesin binding);GO:0019896(axonal transport of mitochondrion);GO:00314…	NA	NA	NA	syntabulin [Source:HGNC Symbol;Acc:HGNC:26011]	MSTRG.213466.1	i	chr8	109545000	109545785	MSTRG.213466	EBAG9	yes	novel	cis	100K	NA	-0.000372826
ENST00000440310	0	chr8	109574188	109645593	MSTRG.213533	SYBU	yes	GO:0000139(Golgi membrane);GO:0005515(protein binding);GO:0005737(cytoplasm);GO:0005794(Golgi apparatus);GO:0005856(cytoskeleton);GO:0005874(microtubule);GO:0005881(cytoplasmic microtubule);GO:0008017(microtubule binding);GO:0016020(membrane);GO:0016021(integral component of membrane);GO:0017075(syntaxin-1 binding);GO:0019894(kinesin binding);GO:0019896(axonal transport of mitochondrion);GO:00314…	NA	NA	NA	syntabulin [Source:HGNC Symbol;Acc:HGNC:26011]	MSTRG.213466.1	i	chr8	109545000	109545785	MSTRG.213466	EBAG9	yes	novel	cis	100K	NA	-0.05522
ENST00000605259	0	chr9	61861625	61863200	MSTRG.219340	AL391987	yes	NA	NA	NA	NA	NA	MSTRG.219339.1	i	chr9	61857602	61859934	MSTRG.219339	FAM27C	yes	novel	cis	10K	NA	0.999776
