# Supplementary material for: Whole-Transcriptome Sequencing of Knee Joint Cartilage from Kashin–Beck Disease and Osteoarthritis Patients
Source: Int J Mol Sci. 2024 Apr 15;25(8):4348. doi: 10.3390/ijms25084348 (PMC11049856; doi:10.3390/ijms25084348)
Supplement: Supplementary file 1 [file ijms-25-04348-s001.zip › Supplementary Table S13_predicted_miRNAs_bind_to_circRNAs.xlsx]

## Sheet: Sheet1
Supplementary Table S13. Predicted results of the interaction between differentially expressed circRNA and miRNA in KBD and OA
circRNA	chr	start	end	strand	exon Count	circType	isoformName	geneName	hosting gene type	flankIntron	gene Discription	GO	KEGG	EC	miRNA	Site Type	TargetScan_score	TargetScan_score_percentile	miranda_score	miranda_Energy
hsa_circ_0126678	chr4	56371451	56384341	-	4	circRNA	ENST00000451613	AASDH	mRNA	chr4:56355423-56371450|chr4:56384341-56387361	aminoadipate-semialdehyde dehydrogenase [Source:HGNC Symbol;Acc:HGNC:23993]	GO:0000166(nucleotide binding);GO:0003824(catalytic activity);GO:0005515(protein binding);GO:0005524(ATP binding);GO:0006629(lipid metabolic process);GO:0006631(fatty acid metabolic process);GO:0016874(ligase activity);GO:0016878(acid-thiol ligase activity);GO:0019482(beta-alanine metabolic process);GO:0043041(amino acid activation for nonribosomal peptide biosynthetic process)	NA	NA	hsa-miR-103a-3p	m8	-0.3235	94	154	-23.43
hsa_circ_0126678	chr4	56371451	56384341	-	4	circRNA	ENST00000451613	AASDH	mRNA	chr4:56355423-56371450|chr4:56384341-56387361	aminoadipate-semialdehyde dehydrogenase [Source:HGNC Symbol;Acc:HGNC:23993]	GO:0000166(nucleotide binding);GO:0003824(catalytic activity);GO:0005515(protein binding);GO:0005524(ATP binding);GO:0006629(lipid metabolic process);GO:0006631(fatty acid metabolic process);GO:0016874(ligase activity);GO:0016878(acid-thiol ligase activity);GO:0019482(beta-alanine metabolic process);GO:0043041(amino acid activation for nonribosomal peptide biosynthetic process)	NA	NA	hsa-miR-107	m8	-0.3235	94	154	-22.31
hsa_circ_0126678	chr4	56371451	56384341	-	4	circRNA	ENST00000451613	AASDH	mRNA	chr4:56355423-56371450|chr4:56384341-56387361	aminoadipate-semialdehyde dehydrogenase [Source:HGNC Symbol;Acc:HGNC:23993]	GO:0000166(nucleotide binding);GO:0003824(catalytic activity);GO:0005515(protein binding);GO:0005524(ATP binding);GO:0006629(lipid metabolic process);GO:0006631(fatty acid metabolic process);GO:0016874(ligase activity);GO:0016878(acid-thiol ligase activity);GO:0019482(beta-alanine metabolic process);GO:0043041(amino acid activation for nonribosomal peptide biosynthetic process)	NA	NA	hsa-miR-128-3p	8mer	-0.44115	99	151	-16.64
hsa_circ_0126678	chr4	56371451	56384341	-	4	circRNA	ENST00000451613	AASDH	mRNA	chr4:56355423-56371450|chr4:56384341-56387361	aminoadipate-semialdehyde dehydrogenase [Source:HGNC Symbol;Acc:HGNC:23993]	GO:0000166(nucleotide binding);GO:0003824(catalytic activity);GO:0005515(protein binding);GO:0005524(ATP binding);GO:0006629(lipid metabolic process);GO:0006631(fatty acid metabolic process);GO:0016874(ligase activity);GO:0016878(acid-thiol ligase activity);GO:0019482(beta-alanine metabolic process);GO:0043041(amino acid activation for nonribosomal peptide biosynthetic process)	NA	NA	hsa-miR-130a-5p	8mer	-0.3653	95	158	-14.68
hsa_circ_0126678	chr4	56371451	56384341	-	4	circRNA	ENST00000451613	AASDH	mRNA	chr4:56355423-56371450|chr4:56384341-56387361	aminoadipate-semialdehyde dehydrogenase [Source:HGNC Symbol;Acc:HGNC:23993]	GO:0000166(nucleotide binding);GO:0003824(catalytic activity);GO:0005515(protein binding);GO:0005524(ATP binding);GO:0006629(lipid metabolic process);GO:0006631(fatty acid metabolic process);GO:0016874(ligase activity);GO:0016878(acid-thiol ligase activity);GO:0019482(beta-alanine metabolic process);GO:0043041(amino acid activation for nonribosomal peptide biosynthetic process)	NA	NA	hsa-miR-132-3p	m8	-0.2525	93	152	-14.13
hsa_circ_0126678	chr4	56371451	56384341	-	4	circRNA	ENST00000451613	AASDH	mRNA	chr4:56355423-56371450|chr4:56384341-56387361	aminoadipate-semialdehyde dehydrogenase [Source:HGNC Symbol;Acc:HGNC:23993]	GO:0000166(nucleotide binding);GO:0003824(catalytic activity);GO:0005515(protein binding);GO:0005524(ATP binding);GO:0006629(lipid metabolic process);GO:0006631(fatty acid metabolic process);GO:0016874(ligase activity);GO:0016878(acid-thiol ligase activity);GO:0019482(beta-alanine metabolic process);GO:0043041(amino acid activation for nonribosomal peptide biosynthetic process)	NA	NA	hsa-miR-15a-5p	m8	-0.271	91	150	-15.2
hsa_circ_0126678	chr4	56371451	56384341	-	4	circRNA	ENST00000451613	AASDH	mRNA	chr4:56355423-56371450|chr4:56384341-56387361	aminoadipate-semialdehyde dehydrogenase [Source:HGNC Symbol;Acc:HGNC:23993]	GO:0000166(nucleotide binding);GO:0003824(catalytic activity);GO:0005515(protein binding);GO:0005524(ATP binding);GO:0006629(lipid metabolic process);GO:0006631(fatty acid metabolic process);GO:0016874(ligase activity);GO:0016878(acid-thiol ligase activity);GO:0019482(beta-alanine metabolic process);GO:0043041(amino acid activation for nonribosomal peptide biosynthetic process)	NA	NA	hsa-miR-15b-5p	m8	-0.2555	90	158	-19.79
hsa_circ_0126678	chr4	56371451	56384341	-	4	circRNA	ENST00000451613	AASDH	mRNA	chr4:56355423-56371450|chr4:56384341-56387361	aminoadipate-semialdehyde dehydrogenase [Source:HGNC Symbol;Acc:HGNC:23993]	GO:0000166(nucleotide binding);GO:0003824(catalytic activity);GO:0005515(protein binding);GO:0005524(ATP binding);GO:0006629(lipid metabolic process);GO:0006631(fatty acid metabolic process);GO:0016874(ligase activity);GO:0016878(acid-thiol ligase activity);GO:0019482(beta-alanine metabolic process);GO:0043041(amino acid activation for nonribosomal peptide biosynthetic process)	NA	NA	hsa-miR-16-1-3p	8mer	-0.3623	96	146	-15.4
hsa_circ_0126678	chr4	56371451	56384341	-	4	circRNA	ENST00000451613	AASDH	mRNA	chr4:56355423-56371450|chr4:56384341-56387361	aminoadipate-semialdehyde dehydrogenase [Source:HGNC Symbol;Acc:HGNC:23993]	GO:0000166(nucleotide binding);GO:0003824(catalytic activity);GO:0005515(protein binding);GO:0005524(ATP binding);GO:0006629(lipid metabolic process);GO:0006631(fatty acid metabolic process);GO:0016874(ligase activity);GO:0016878(acid-thiol ligase activity);GO:0019482(beta-alanine metabolic process);GO:0043041(amino acid activation for nonribosomal peptide biosynthetic process)	NA	NA	hsa-miR-16-5p	m8	-0.271	91	149	-14.44
hsa_circ_0126678	chr4	56371451	56384341	-	4	circRNA	ENST00000451613	AASDH	mRNA	chr4:56355423-56371450|chr4:56384341-56387361	aminoadipate-semialdehyde dehydrogenase [Source:HGNC Symbol;Acc:HGNC:23993]	GO:0000166(nucleotide binding);GO:0003824(catalytic activity);GO:0005515(protein binding);GO:0005524(ATP binding);GO:0006629(lipid metabolic process);GO:0006631(fatty acid metabolic process);GO:0016874(ligase activity);GO:0016878(acid-thiol ligase activity);GO:0019482(beta-alanine metabolic process);GO:0043041(amino acid activation for nonribosomal peptide biosynthetic process)	NA	NA	hsa-miR-212-3p	m8	-0.2215	89	150	-10.18
hsa_circ_0126678	chr4	56371451	56384341	-	4	circRNA	ENST00000451613	AASDH	mRNA	chr4:56355423-56371450|chr4:56384341-56387361	aminoadipate-semialdehyde dehydrogenase [Source:HGNC Symbol;Acc:HGNC:23993]	GO:0000166(nucleotide binding);GO:0003824(catalytic activity);GO:0005515(protein binding);GO:0005524(ATP binding);GO:0006629(lipid metabolic process);GO:0006631(fatty acid metabolic process);GO:0016874(ligase activity);GO:0016878(acid-thiol ligase activity);GO:0019482(beta-alanine metabolic process);GO:0043041(amino acid activation for nonribosomal peptide biosynthetic process)	NA	NA	hsa-miR-216a-3p	8mer	-0.4391	99	141	-15.7
hsa_circ_0126678	chr4	56371451	56384341	-	4	circRNA	ENST00000451613	AASDH	mRNA	chr4:56355423-56371450|chr4:56384341-56387361	aminoadipate-semialdehyde dehydrogenase [Source:HGNC Symbol;Acc:HGNC:23993]	GO:0000166(nucleotide binding);GO:0003824(catalytic activity);GO:0005515(protein binding);GO:0005524(ATP binding);GO:0006629(lipid metabolic process);GO:0006631(fatty acid metabolic process);GO:0016874(ligase activity);GO:0016878(acid-thiol ligase activity);GO:0019482(beta-alanine metabolic process);GO:0043041(amino acid activation for nonribosomal peptide biosynthetic process)	NA	NA	hsa-miR-219a-1-3p	8mer	-0.47135	99	147	-15.91
hsa_circ_0126678	chr4	56371451	56384341	-	4	circRNA	ENST00000451613	AASDH	mRNA	chr4:56355423-56371450|chr4:56384341-56387361	aminoadipate-semialdehyde dehydrogenase [Source:HGNC Symbol;Acc:HGNC:23993]	GO:0000166(nucleotide binding);GO:0003824(catalytic activity);GO:0005515(protein binding);GO:0005524(ATP binding);GO:0006629(lipid metabolic process);GO:0006631(fatty acid metabolic process);GO:0016874(ligase activity);GO:0016878(acid-thiol ligase activity);GO:0019482(beta-alanine metabolic process);GO:0043041(amino acid activation for nonribosomal peptide biosynthetic process)	NA	NA	hsa-miR-22-5p	8mer	-0.36115	92	156	-18.67
hsa_circ_0126678	chr4	56371451	56384341	-	4	circRNA	ENST00000451613	AASDH	mRNA	chr4:56355423-56371450|chr4:56384341-56387361	aminoadipate-semialdehyde dehydrogenase [Source:HGNC Symbol;Acc:HGNC:23993]	GO:0000166(nucleotide binding);GO:0003824(catalytic activity);GO:0005515(protein binding);GO:0005524(ATP binding);GO:0006629(lipid metabolic process);GO:0006631(fatty acid metabolic process);GO:0016874(ligase activity);GO:0016878(acid-thiol ligase activity);GO:0019482(beta-alanine metabolic process);GO:0043041(amino acid activation for nonribosomal peptide biosynthetic process)	NA	NA	hsa-miR-27a-3p	m8	-0.2155	84	147	-14.58
hsa_circ_0126678	chr4	56371451	56384341	-	4	circRNA	ENST00000451613	AASDH	mRNA	chr4:56355423-56371450|chr4:56384341-56387361	aminoadipate-semialdehyde dehydrogenase [Source:HGNC Symbol;Acc:HGNC:23993]	GO:0000166(nucleotide binding);GO:0003824(catalytic activity);GO:0005515(protein binding);GO:0005524(ATP binding);GO:0006629(lipid metabolic process);GO:0006631(fatty acid metabolic process);GO:0016874(ligase activity);GO:0016878(acid-thiol ligase activity);GO:0019482(beta-alanine metabolic process);GO:0043041(amino acid activation for nonribosomal peptide biosynthetic process)	NA	NA	hsa-miR-27b-3p	m8	-0.2155	84	147	-14.58
hsa_circ_0126678	chr4	56371451	56384341	-	4	circRNA	ENST00000451613	AASDH	mRNA	chr4:56355423-56371450|chr4:56384341-56387361	aminoadipate-semialdehyde dehydrogenase [Source:HGNC Symbol;Acc:HGNC:23993]	GO:0000166(nucleotide binding);GO:0003824(catalytic activity);GO:0005515(protein binding);GO:0005524(ATP binding);GO:0006629(lipid metabolic process);GO:0006631(fatty acid metabolic process);GO:0016874(ligase activity);GO:0016878(acid-thiol ligase activity);GO:0019482(beta-alanine metabolic process);GO:0043041(amino acid activation for nonribosomal peptide biosynthetic process)	NA	NA	hsa-miR-33a-3p	8mer	-0.39115	98	154	-16.56
hsa_circ_0030582	chr13	95115922	95188542	-	11	circRNA	ENST00000645237	ABCC4	mRNA	chr13:95083290-95115921|chr13:95188542-95194835	ATP binding cassette subfamily C member 4 [Source:HGNC Symbol;Acc:HGNC:55]	GO:0000166(nucleotide binding);GO:0002576(platelet degranulation);GO:0005515(protein binding);GO:0005524(ATP binding);GO:0005886(plasma membrane);GO:0010033(response to organic substance);GO:0010243(response to organonitrogen compound);GO:0014070(response to organic cyclic compound);GO:0015562(efflux transmembrane transporter activity);GO:0015662(ion transmembrane transporter activity, phosphoryl…	01523(Antifolate resistance);02010(ABC transporters);04024(cAMP signaling pathway);04976(Bile secretion)	NA	hsa-miR-128-1-5p	m8	-0.1715	93	157	-29.25
hsa_circ_0030582	chr13	95115922	95188542	-	11	circRNA	ENST00000645237	ABCC4	mRNA	chr13:95083290-95115921|chr13:95188542-95194835	ATP binding cassette subfamily C member 4 [Source:HGNC Symbol;Acc:HGNC:55]	GO:0000166(nucleotide binding);GO:0002576(platelet degranulation);GO:0005515(protein binding);GO:0005524(ATP binding);GO:0005886(plasma membrane);GO:0010033(response to organic substance);GO:0010243(response to organonitrogen compound);GO:0014070(response to organic cyclic compound);GO:0015562(efflux transmembrane transporter activity);GO:0015662(ion transmembrane transporter activity, phosphoryl…	01523(Antifolate resistance);02010(ABC transporters);04024(cAMP signaling pathway);04976(Bile secretion)	NA	hsa-miR-139-5p	m8	-0.245	90	146	-13.41
hsa_circ_0030582	chr13	95115922	95188542	-	11	circRNA	ENST00000645237	ABCC4	mRNA	chr13:95083290-95115921|chr13:95188542-95194835	ATP binding cassette subfamily C member 4 [Source:HGNC Symbol;Acc:HGNC:55]	GO:0000166(nucleotide binding);GO:0002576(platelet degranulation);GO:0005515(protein binding);GO:0005524(ATP binding);GO:0005886(plasma membrane);GO:0010033(response to organic substance);GO:0010243(response to organonitrogen compound);GO:0014070(response to organic cyclic compound);GO:0015562(efflux transmembrane transporter activity);GO:0015662(ion transmembrane transporter activity, phosphoryl…	01523(Antifolate resistance);02010(ABC transporters);04024(cAMP signaling pathway);04976(Bile secretion)	NA	hsa-miR-16-2-3p	1a	-0.13275	53	141	-10.61
hsa_circ_0030582	chr13	95115922	95188542	-	11	circRNA	ENST00000645237	ABCC4	mRNA	chr13:95083290-95115921|chr13:95188542-95194835	ATP binding cassette subfamily C member 4 [Source:HGNC Symbol;Acc:HGNC:55]	GO:0000166(nucleotide binding);GO:0002576(platelet degranulation);GO:0005515(protein binding);GO:0005524(ATP binding);GO:0005886(plasma membrane);GO:0010033(response to organic substance);GO:0010243(response to organonitrogen compound);GO:0014070(response to organic cyclic compound);GO:0015562(efflux transmembrane transporter activity);GO:0015662(ion transmembrane transporter activity, phosphoryl…	01523(Antifolate resistance);02010(ABC transporters);04024(cAMP signaling pathway);04976(Bile secretion)	NA	hsa-miR-17-3p	m8	-0.156	74	145	-17.51
hsa_circ_0030582	chr13	95115922	95188542	-	11	circRNA	ENST00000645237	ABCC4	mRNA	chr13:95083290-95115921|chr13:95188542-95194835	ATP binding cassette subfamily C member 4 [Source:HGNC Symbol;Acc:HGNC:55]	GO:0000166(nucleotide binding);GO:0002576(platelet degranulation);GO:0005515(protein binding);GO:0005524(ATP binding);GO:0005886(plasma membrane);GO:0010033(response to organic substance);GO:0010243(response to organonitrogen compound);GO:0014070(response to organic cyclic compound);GO:0015562(efflux transmembrane transporter activity);GO:0015662(ion transmembrane transporter activity, phosphoryl…	01523(Antifolate resistance);02010(ABC transporters);04024(cAMP signaling pathway);04976(Bile secretion)	NA	hsa-miR-18a-3p	8mer	-0.2273	91	141	-19.64
hsa_circ_0030582	chr13	95115922	95188542	-	11	circRNA	ENST00000645237	ABCC4	mRNA	chr13:95083290-95115921|chr13:95188542-95194835	ATP binding cassette subfamily C member 4 [Source:HGNC Symbol;Acc:HGNC:55]	GO:0000166(nucleotide binding);GO:0002576(platelet degranulation);GO:0005515(protein binding);GO:0005524(ATP binding);GO:0005886(plasma membrane);GO:0010033(response to organic substance);GO:0010243(response to organonitrogen compound);GO:0014070(response to organic cyclic compound);GO:0015562(efflux transmembrane transporter activity);GO:0015662(ion transmembrane transporter activity, phosphoryl…	01523(Antifolate resistance);02010(ABC transporters);04024(cAMP signaling pathway);04976(Bile secretion)	NA	hsa-miR-199a-5p	1a	-0.0972	50	145	-22.8
hsa_circ_0030582	chr13	95115922	95188542	-	11	circRNA	ENST00000645237	ABCC4	mRNA	chr13:95083290-95115921|chr13:95188542-95194835	ATP binding cassette subfamily C member 4 [Source:HGNC Symbol;Acc:HGNC:55]	GO:0000166(nucleotide binding);GO:0002576(platelet degranulation);GO:0005515(protein binding);GO:0005524(ATP binding);GO:0005886(plasma membrane);GO:0010033(response to organic substance);GO:0010243(response to organonitrogen compound);GO:0014070(response to organic cyclic compound);GO:0015562(efflux transmembrane transporter activity);GO:0015662(ion transmembrane transporter activity, phosphoryl…	01523(Antifolate resistance);02010(ABC transporters);04024(cAMP signaling pathway);04976(Bile secretion)	NA	hsa-miR-27a-3p	m8	-0.1185	55	145	-14.27
hsa_circ_0030582	chr13	95115922	95188542	-	11	circRNA	ENST00000645237	ABCC4	mRNA	chr13:95083290-95115921|chr13:95188542-95194835	ATP binding cassette subfamily C member 4 [Source:HGNC Symbol;Acc:HGNC:55]	GO:0000166(nucleotide binding);GO:0002576(platelet degranulation);GO:0005515(protein binding);GO:0005524(ATP binding);GO:0005886(plasma membrane);GO:0010033(response to organic substance);GO:0010243(response to organonitrogen compound);GO:0014070(response to organic cyclic compound);GO:0015562(efflux transmembrane transporter activity);GO:0015662(ion transmembrane transporter activity, phosphoryl…	01523(Antifolate resistance);02010(ABC transporters);04024(cAMP signaling pathway);04976(Bile secretion)	NA	hsa-miR-29a-3p	m8	-0.187	76	159	-18.69
hsa_circ_0030582	chr13	95115922	95188542	-	11	circRNA	ENST00000645237	ABCC4	mRNA	chr13:95083290-95115921|chr13:95188542-95194835	ATP binding cassette subfamily C member 4 [Source:HGNC Symbol;Acc:HGNC:55]	GO:0000166(nucleotide binding);GO:0002576(platelet degranulation);GO:0005515(protein binding);GO:0005524(ATP binding);GO:0005886(plasma membrane);GO:0010033(response to organic substance);GO:0010243(response to organonitrogen compound);GO:0014070(response to organic cyclic compound);GO:0015562(efflux transmembrane transporter activity);GO:0015662(ion transmembrane transporter activity, phosphoryl…	01523(Antifolate resistance);02010(ABC transporters);04024(cAMP signaling pathway);04976(Bile secretion)	NA	hsa-miR-29b-3p	m8	-0.156	66	159	-17.36
hsa_circ_0030582	chr13	95115922	95188542	-	11	circRNA	ENST00000645237	ABCC4	mRNA	chr13:95083290-95115921|chr13:95188542-95194835	ATP binding cassette subfamily C member 4 [Source:HGNC Symbol;Acc:HGNC:55]	GO:0000166(nucleotide binding);GO:0002576(platelet degranulation);GO:0005515(protein binding);GO:0005524(ATP binding);GO:0005886(plasma membrane);GO:0010033(response to organic substance);GO:0010243(response to organonitrogen compound);GO:0014070(response to organic cyclic compound);GO:0015562(efflux transmembrane transporter activity);GO:0015662(ion transmembrane transporter activity, phosphoryl…	01523(Antifolate resistance);02010(ABC transporters);04024(cAMP signaling pathway);04976(Bile secretion)	NA	hsa-miR-31-3p	8mer	-0.37715	97	157	-17.64
circRNA5912	chr3	100862312	100902686	-	12	circRNA	ENST00000495063	ABI3BP	mRNA	chr3:100851940-100862311|chr3:100902686-100926302	ABI family member 3 binding protein [Source:HGNC Symbol;Acc:HGNC:17265]	GO:0005201(extracellular matrix structural constituent);GO:0005515(protein binding);GO:0005576(extracellular region);GO:0005615(extracellular space);GO:0062023(collagen-containing extracellular matrix)	NA	NA	hsa-miR-103a-1-5p	8mer	-0.2832	89	147	-12.71
circRNA5912	chr3	100862312	100902686	-	12	circRNA	ENST00000495063	ABI3BP	mRNA	chr3:100851940-100862311|chr3:100902686-100926302	ABI family member 3 binding protein [Source:HGNC Symbol;Acc:HGNC:17265]	GO:0005201(extracellular matrix structural constituent);GO:0005515(protein binding);GO:0005576(extracellular region);GO:0005615(extracellular space);GO:0062023(collagen-containing extracellular matrix)	NA	NA	hsa-miR-103a-2-5p	8mer	-0.2832	89	147	-11.4
circRNA5912	chr3	100862312	100902686	-	12	circRNA	ENST00000495063	ABI3BP	mRNA	chr3:100851940-100862311|chr3:100902686-100926302	ABI family member 3 binding protein [Source:HGNC Symbol;Acc:HGNC:17265]	GO:0005201(extracellular matrix structural constituent);GO:0005515(protein binding);GO:0005576(extracellular region);GO:0005615(extracellular space);GO:0062023(collagen-containing extracellular matrix)	NA	NA	hsa-miR-106a-3p	8mer	-0.41115	98	145	-10.59
circRNA5912	chr3	100862312	100902686	-	12	circRNA	ENST00000495063	ABI3BP	mRNA	chr3:100851940-100862311|chr3:100902686-100926302	ABI family member 3 binding protein [Source:HGNC Symbol;Acc:HGNC:17265]	GO:0005201(extracellular matrix structural constituent);GO:0005515(protein binding);GO:0005576(extracellular region);GO:0005615(extracellular space);GO:0062023(collagen-containing extracellular matrix)	NA	NA	hsa-miR-132-3p	m8	-0.2165	88	145	-12.5
circRNA5912	chr3	100862312	100902686	-	12	circRNA	ENST00000495063	ABI3BP	mRNA	chr3:100851940-100862311|chr3:100902686-100926302	ABI family member 3 binding protein [Source:HGNC Symbol;Acc:HGNC:17265]	GO:0005201(extracellular matrix structural constituent);GO:0005515(protein binding);GO:0005576(extracellular region);GO:0005615(extracellular space);GO:0062023(collagen-containing extracellular matrix)	NA	NA	hsa-miR-135a-5p	m8	-0.212	81	164	-25.59
circRNA5912	chr3	100862312	100902686	-	12	circRNA	ENST00000495063	ABI3BP	mRNA	chr3:100851940-100862311|chr3:100902686-100926302	ABI family member 3 binding protein [Source:HGNC Symbol;Acc:HGNC:17265]	GO:0005201(extracellular matrix structural constituent);GO:0005515(protein binding);GO:0005576(extracellular region);GO:0005615(extracellular space);GO:0062023(collagen-containing extracellular matrix)	NA	NA	hsa-miR-147a	m8	-0.158	76	146	-12
circRNA5912	chr3	100862312	100902686	-	12	circRNA	ENST00000495063	ABI3BP	mRNA	chr3:100851940-100862311|chr3:100902686-100926302	ABI family member 3 binding protein [Source:HGNC Symbol;Acc:HGNC:17265]	GO:0005201(extracellular matrix structural constituent);GO:0005515(protein binding);GO:0005576(extracellular region);GO:0005615(extracellular space);GO:0062023(collagen-containing extracellular matrix)	NA	NA	hsa-miR-15b-3p	1a	-0.1724	71	142	-11.67
circRNA5912	chr3	100862312	100902686	-	12	circRNA	ENST00000495063	ABI3BP	mRNA	chr3:100851940-100862311|chr3:100902686-100926302	ABI family member 3 binding protein [Source:HGNC Symbol;Acc:HGNC:17265]	GO:0005201(extracellular matrix structural constituent);GO:0005515(protein binding);GO:0005576(extracellular region);GO:0005615(extracellular space);GO:0062023(collagen-containing extracellular matrix)	NA	NA	hsa-miR-182-5p	m8	-0.178	70	150	-18.24
circRNA5912	chr3	100862312	100902686	-	12	circRNA	ENST00000495063	ABI3BP	mRNA	chr3:100851940-100862311|chr3:100902686-100926302	ABI family member 3 binding protein [Source:HGNC Symbol;Acc:HGNC:17265]	GO:0005201(extracellular matrix structural constituent);GO:0005515(protein binding);GO:0005576(extracellular region);GO:0005615(extracellular space);GO:0062023(collagen-containing extracellular matrix)	NA	NA	hsa-miR-199a-3p	m8	-0.298	94	147	-13.44
circRNA5912	chr3	100862312	100902686	-	12	circRNA	ENST00000495063	ABI3BP	mRNA	chr3:100851940-100862311|chr3:100902686-100926302	ABI family member 3 binding protein [Source:HGNC Symbol;Acc:HGNC:17265]	GO:0005201(extracellular matrix structural constituent);GO:0005515(protein binding);GO:0005576(extracellular region);GO:0005615(extracellular space);GO:0062023(collagen-containing extracellular matrix)	NA	NA	hsa-miR-199a-5p	m8	-0.232	87	145	-12.72
circRNA5912	chr3	100862312	100902686	-	12	circRNA	ENST00000495063	ABI3BP	mRNA	chr3:100851940-100862311|chr3:100902686-100926302	ABI family member 3 binding protein [Source:HGNC Symbol;Acc:HGNC:17265]	GO:0005201(extracellular matrix structural constituent);GO:0005515(protein binding);GO:0005576(extracellular region);GO:0005615(extracellular space);GO:0062023(collagen-containing extracellular matrix)	NA	NA	hsa-miR-199b-3p	m8	-0.298	94	147	-13.44
circRNA5912	chr3	100862312	100902686	-	12	circRNA	ENST00000495063	ABI3BP	mRNA	chr3:100851940-100862311|chr3:100902686-100926302	ABI family member 3 binding protein [Source:HGNC Symbol;Acc:HGNC:17265]	GO:0005201(extracellular matrix structural constituent);GO:0005515(protein binding);GO:0005576(extracellular region);GO:0005615(extracellular space);GO:0062023(collagen-containing extracellular matrix)	NA	NA	hsa-miR-199b-5p	m8	-0.232	87	147	-15.75
circRNA5912	chr3	100862312	100902686	-	12	circRNA	ENST00000495063	ABI3BP	mRNA	chr3:100851940-100862311|chr3:100902686-100926302	ABI family member 3 binding protein [Source:HGNC Symbol;Acc:HGNC:17265]	GO:0005201(extracellular matrix structural constituent);GO:0005515(protein binding);GO:0005576(extracellular region);GO:0005615(extracellular space);GO:0062023(collagen-containing extracellular matrix)	NA	NA	hsa-miR-208a-5p	m8	-0.147	64	146	-15.88
circRNA5912	chr3	100862312	100902686	-	12	circRNA	ENST00000495063	ABI3BP	mRNA	chr3:100851940-100862311|chr3:100902686-100926302	ABI family member 3 binding protein [Source:HGNC Symbol;Acc:HGNC:17265]	GO:0005201(extracellular matrix structural constituent);GO:0005515(protein binding);GO:0005576(extracellular region);GO:0005615(extracellular space);GO:0062023(collagen-containing extracellular matrix)	NA	NA	hsa-miR-212-3p	m8	-0.232	90	145	-12.2
circRNA5912	chr3	100862312	100902686	-	12	circRNA	ENST00000495063	ABI3BP	mRNA	chr3:100851940-100862311|chr3:100902686-100926302	ABI family member 3 binding protein [Source:HGNC Symbol;Acc:HGNC:17265]	GO:0005201(extracellular matrix structural constituent);GO:0005515(protein binding);GO:0005576(extracellular region);GO:0005615(extracellular space);GO:0062023(collagen-containing extracellular matrix)	NA	NA	hsa-miR-215-3p	8mer	-0.3952	97	145	-15.2
circRNA5912	chr3	100862312	100902686	-	12	circRNA	ENST00000495063	ABI3BP	mRNA	chr3:100851940-100862311|chr3:100902686-100926302	ABI family member 3 binding protein [Source:HGNC Symbol;Acc:HGNC:17265]	GO:0005201(extracellular matrix structural constituent);GO:0005515(protein binding);GO:0005576(extracellular region);GO:0005615(extracellular space);GO:0062023(collagen-containing extracellular matrix)	NA	NA	hsa-miR-216a-5p	m8	-0.2015	82	141	-10.38
circRNA5912	chr3	100862312	100902686	-	12	circRNA	ENST00000495063	ABI3BP	mRNA	chr3:100851940-100862311|chr3:100902686-100926302	ABI family member 3 binding protein [Source:HGNC Symbol;Acc:HGNC:17265]	GO:0005201(extracellular matrix structural constituent);GO:0005515(protein binding);GO:0005576(extracellular region);GO:0005615(extracellular space);GO:0062023(collagen-containing extracellular matrix)	NA	NA	hsa-miR-30a-3p	m8	-0.133	54	149	-14.19
ciRNA63	chr17	15742480	15742888	+	1	ciRNA	ENST00000413242	AC005324	mRNA	chr17:15742479-15742908	novel transcript	NA	NA	NA	hsa-miR-210-5p	m8	-0.104	68	140	-14.79
ciRNA63	chr17	15742480	15742888	+	1	ciRNA	ENST00000413242	AC005324	mRNA	chr17:15742479-15742908	novel transcript	NA	NA	NA	hsa-miR-214-5p	m8	-0.093	69	146	-20.53
hsa_circ_0120782	chr2	65500629	65501147	+	1	circRNA	ENST00000377977	AC007389	mRNA	chr2:65476349-65500628|chr2:65501147-65691781	novel transcript	NA	NA	NA	hsa-miR-132-3p	m8	-0.186	80	146	-14.47
hsa_circ_0120782	chr2	65500629	65501147	+	1	circRNA	ENST00000377977	AC007389	mRNA	chr2:65476349-65500628|chr2:65501147-65691781	novel transcript	NA	NA	NA	hsa-miR-15a-5p	m8	-0.1445	61	171	-19.49
hsa_circ_0120782	chr2	65500629	65501147	+	1	circRNA	ENST00000377977	AC007389	mRNA	chr2:65476349-65500628|chr2:65501147-65691781	novel transcript	NA	NA	NA	hsa-miR-15b-5p	m8	-0.1445	61	158	-15.72
hsa_circ_0120782	chr2	65500629	65501147	+	1	circRNA	ENST00000377977	AC007389	mRNA	chr2:65476349-65500628|chr2:65501147-65691781	novel transcript	NA	NA	NA	hsa-miR-16-5p	m8	-0.1445	61	151	-14.44
hsa_circ_0120782	chr2	65500629	65501147	+	1	circRNA	ENST00000377977	AC007389	mRNA	chr2:65476349-65500628|chr2:65501147-65691781	novel transcript	NA	NA	NA	hsa-miR-181b-3p	m8	-0.111	50	157	-15.53
hsa_circ_0120782	chr2	65500629	65501147	+	1	circRNA	ENST00000377977	AC007389	mRNA	chr2:65476349-65500628|chr2:65501147-65691781	novel transcript	NA	NA	NA	hsa-miR-212-3p	m8	-0.155	71	140	-11.73
hsa_circ_0005959	chr19	58294098	58295581	+	1	circRNA	ENST00000637233	AC020915	mRNA	chr19:58286205-58294097|chr19:58295581-58306087	novel protein	GO:0003676(nucleic acid binding);GO:0006355(regulation of transcription, DNA-templated)	NA	NA	hsa-let-7a-3p	m8	-0.239	88	157	-14.14
hsa_circ_0005959	chr19	58294098	58295581	+	1	circRNA	ENST00000637233	AC020915	mRNA	chr19:58286205-58294097|chr19:58295581-58306087	novel protein	GO:0003676(nucleic acid binding);GO:0006355(regulation of transcription, DNA-templated)	NA	NA	hsa-let-7b-3p	m8	-0.239	89	166	-17.73
hsa_circ_0005959	chr19	58294098	58295581	+	1	circRNA	ENST00000637233	AC020915	mRNA	chr19:58286205-58294097|chr19:58295581-58306087	novel protein	GO:0003676(nucleic acid binding);GO:0006355(regulation of transcription, DNA-templated)	NA	NA	hsa-let-7f-1-3p	m8	-0.208	80	162	-16.39
hsa_circ_0005959	chr19	58294098	58295581	+	1	circRNA	ENST00000637233	AC020915	mRNA	chr19:58286205-58294097|chr19:58295581-58306087	novel protein	GO:0003676(nucleic acid binding);GO:0006355(regulation of transcription, DNA-templated)	NA	NA	hsa-miR-101-5p	m8	-0.1575	69	157	-18.64
hsa_circ_0005959	chr19	58294098	58295581	+	1	circRNA	ENST00000637233	AC020915	mRNA	chr19:58286205-58294097|chr19:58295581-58306087	novel protein	GO:0003676(nucleic acid binding);GO:0006355(regulation of transcription, DNA-templated)	NA	NA	hsa-miR-125b-5p	8mer	-0.3832	97	144	-16.45
hsa_circ_0005959	chr19	58294098	58295581	+	1	circRNA	ENST00000637233	AC020915	mRNA	chr19:58286205-58294097|chr19:58295581-58306087	novel protein	GO:0003676(nucleic acid binding);GO:0006355(regulation of transcription, DNA-templated)	NA	NA	hsa-miR-135a-2-3p	8mer	-0.1962	83	151	-18.98
hsa_circ_0005959	chr19	58294098	58295581	+	1	circRNA	ENST00000637233	AC020915	mRNA	chr19:58286205-58294097|chr19:58295581-58306087	novel protein	GO:0003676(nucleic acid binding);GO:0006355(regulation of transcription, DNA-templated)	NA	NA	hsa-miR-135a-5p	8mer	-0.1452	60	157	-24.02
hsa_circ_0005959	chr19	58294098	58295581	+	1	circRNA	ENST00000637233	AC020915	mRNA	chr19:58286205-58294097|chr19:58295581-58306087	novel protein	GO:0003676(nucleic acid binding);GO:0006355(regulation of transcription, DNA-templated)	NA	NA	hsa-miR-18a-3p	m8	-0.143	78	156	-30.96
hsa_circ_0005959	chr19	58294098	58295581	+	1	circRNA	ENST00000637233	AC020915	mRNA	chr19:58286205-58294097|chr19:58295581-58306087	novel protein	GO:0003676(nucleic acid binding);GO:0006355(regulation of transcription, DNA-templated)	NA	NA	hsa-miR-199a-5p	8mer	-0.1552	72	147	-19.41
hsa_circ_0005959	chr19	58294098	58295581	+	1	circRNA	ENST00000637233	AC020915	mRNA	chr19:58286205-58294097|chr19:58295581-58306087	novel protein	GO:0003676(nucleic acid binding);GO:0006355(regulation of transcription, DNA-templated)	NA	NA	hsa-miR-199b-5p	8mer	-0.1552	72	151	-19.76
hsa_circ_0005959	chr19	58294098	58295581	+	1	circRNA	ENST00000637233	AC020915	mRNA	chr19:58286205-58294097|chr19:58295581-58306087	novel protein	GO:0003676(nucleic acid binding);GO:0006355(regulation of transcription, DNA-templated)	NA	NA	hsa-miR-204-3p	8mer	-0.34925	96	147	-21.06
hsa_circ_0005959	chr19	58294098	58295581	+	1	circRNA	ENST00000637233	AC020915	mRNA	chr19:58286205-58294097|chr19:58295581-58306087	novel protein	GO:0003676(nucleic acid binding);GO:0006355(regulation of transcription, DNA-templated)	NA	NA	hsa-miR-210-3p	m8	-0.121	63	150	-21.21
hsa_circ_0005959	chr19	58294098	58295581	+	1	circRNA	ENST00000637233	AC020915	mRNA	chr19:58286205-58294097|chr19:58295581-58306087	novel protein	GO:0003676(nucleic acid binding);GO:0006355(regulation of transcription, DNA-templated)	NA	NA	hsa-miR-214-5p	m8	-0.1495	83	158	-19.9
hsa_circ_0005959	chr19	58294098	58295581	+	1	circRNA	ENST00000637233	AC020915	mRNA	chr19:58286205-58294097|chr19:58295581-58306087	novel protein	GO:0003676(nucleic acid binding);GO:0006355(regulation of transcription, DNA-templated)	NA	NA	hsa-miR-93-3p	8mer	-0.2362	88	144	-14.88
hsa_circ_0005959	chr19	58294098	58295581	+	1	circRNA	ENST00000637233	AC020915	mRNA	chr19:58286205-58294097|chr19:58295581-58306087	novel protein	GO:0003676(nucleic acid binding);GO:0006355(regulation of transcription, DNA-templated)	NA	NA	hsa-miR-98-3p	m8	-0.239	88	162	-13.44
hsa_circ_0069760	chr4	54280316	54290554	+	7	circRNA	ENST00000507166	AC058822	mRNA	chr4:54278515-54280315|chr4:54290554-54295124	novel FIP1L1-PDGFRA fusion protein	GO:0004672(protein kinase activity);GO:0004713(protein tyrosine kinase activity);GO:0004714(transmembrane receptor protein tyrosine kinase activity);GO:0005524(ATP binding);GO:0005634(nucleus);GO:0005654(nucleoplasm);GO:0006468(protein phosphorylation);GO:0007169(transmembrane receptor protein tyrosine kinase signaling pathway);GO:0018108(peptidyl-tyrosine phosphorylation)	NA	NA	hsa-miR-101-5p	m8	-0.22	86	147	-11.25
hsa_circ_0069760	chr4	54280316	54290554	+	7	circRNA	ENST00000507166	AC058822	mRNA	chr4:54278515-54280315|chr4:54290554-54295124	novel FIP1L1-PDGFRA fusion protein	GO:0004672(protein kinase activity);GO:0004713(protein tyrosine kinase activity);GO:0004714(transmembrane receptor protein tyrosine kinase activity);GO:0005524(ATP binding);GO:0005634(nucleus);GO:0005654(nucleoplasm);GO:0006468(protein phosphorylation);GO:0007169(transmembrane receptor protein tyrosine kinase signaling pathway);GO:0018108(peptidyl-tyrosine phosphorylation)	NA	NA	hsa-miR-10b-3p	m8	-0.1525	61	140	-11.25
hsa_circ_0069760	chr4	54280316	54290554	+	7	circRNA	ENST00000507166	AC058822	mRNA	chr4:54278515-54280315|chr4:54290554-54295124	novel FIP1L1-PDGFRA fusion protein	GO:0004672(protein kinase activity);GO:0004713(protein tyrosine kinase activity);GO:0004714(transmembrane receptor protein tyrosine kinase activity);GO:0005524(ATP binding);GO:0005634(nucleus);GO:0005654(nucleoplasm);GO:0006468(protein phosphorylation);GO:0007169(transmembrane receptor protein tyrosine kinase signaling pathway);GO:0018108(peptidyl-tyrosine phosphorylation)	NA	NA	hsa-miR-130a-5p	m8	-0.3745	95	166	-12.57
hsa_circ_0069760	chr4	54280316	54290554	+	7	circRNA	ENST00000507166	AC058822	mRNA	chr4:54278515-54280315|chr4:54290554-54295124	novel FIP1L1-PDGFRA fusion protein	GO:0004672(protein kinase activity);GO:0004713(protein tyrosine kinase activity);GO:0004714(transmembrane receptor protein tyrosine kinase activity);GO:0005524(ATP binding);GO:0005634(nucleus);GO:0005654(nucleoplasm);GO:0006468(protein phosphorylation);GO:0007169(transmembrane receptor protein tyrosine kinase signaling pathway);GO:0018108(peptidyl-tyrosine phosphorylation)	NA	NA	hsa-miR-15b-3p	m8	-0.121	52	149	-17.72
hsa_circ_0069760	chr4	54280316	54290554	+	7	circRNA	ENST00000507166	AC058822	mRNA	chr4:54278515-54280315|chr4:54290554-54295124	novel FIP1L1-PDGFRA fusion protein	GO:0004672(protein kinase activity);GO:0004713(protein tyrosine kinase activity);GO:0004714(transmembrane receptor protein tyrosine kinase activity);GO:0005524(ATP binding);GO:0005634(nucleus);GO:0005654(nucleoplasm);GO:0006468(protein phosphorylation);GO:0007169(transmembrane receptor protein tyrosine kinase signaling pathway);GO:0018108(peptidyl-tyrosine phosphorylation)	NA	NA	hsa-miR-211-3p	8mer	-0.3172	96	150	-21.58
hsa_circ_0069760	chr4	54280316	54290554	+	7	circRNA	ENST00000507166	AC058822	mRNA	chr4:54278515-54280315|chr4:54290554-54295124	novel FIP1L1-PDGFRA fusion protein	GO:0004672(protein kinase activity);GO:0004713(protein tyrosine kinase activity);GO:0004714(transmembrane receptor protein tyrosine kinase activity);GO:0005524(ATP binding);GO:0005634(nucleus);GO:0005654(nucleoplasm);GO:0006468(protein phosphorylation);GO:0007169(transmembrane receptor protein tyrosine kinase signaling pathway);GO:0018108(peptidyl-tyrosine phosphorylation)	NA	NA	hsa-miR-214-3p	m8	-0.165	77	142	-15.57
hsa_circ_0069760	chr4	54280316	54290554	+	7	circRNA	ENST00000507166	AC058822	mRNA	chr4:54278515-54280315|chr4:54290554-54295124	novel FIP1L1-PDGFRA fusion protein	GO:0004672(protein kinase activity);GO:0004713(protein tyrosine kinase activity);GO:0004714(transmembrane receptor protein tyrosine kinase activity);GO:0005524(ATP binding);GO:0005634(nucleus);GO:0005654(nucleoplasm);GO:0006468(protein phosphorylation);GO:0007169(transmembrane receptor protein tyrosine kinase signaling pathway);GO:0018108(peptidyl-tyrosine phosphorylation)	NA	NA	hsa-miR-33a-5p	m8	-0.209	86	147	-19
hsa_circ_0069760	chr4	54280316	54290554	+	7	circRNA	ENST00000507166	AC058822	mRNA	chr4:54278515-54280315|chr4:54290554-54295124	novel FIP1L1-PDGFRA fusion protein	GO:0004672(protein kinase activity);GO:0004713(protein tyrosine kinase activity);GO:0004714(transmembrane receptor protein tyrosine kinase activity);GO:0005524(ATP binding);GO:0005634(nucleus);GO:0005654(nucleoplasm);GO:0006468(protein phosphorylation);GO:0007169(transmembrane receptor protein tyrosine kinase signaling pathway);GO:0018108(peptidyl-tyrosine phosphorylation)	NA	NA	hsa-miR-7-1-3p	m8	-0.1255	54	152	-14.92
hsa_circ_0069760	chr4	54280316	54290554	+	7	circRNA	ENST00000507166	AC058822	mRNA	chr4:54278515-54280315|chr4:54290554-54295124	novel FIP1L1-PDGFRA fusion protein	GO:0004672(protein kinase activity);GO:0004713(protein tyrosine kinase activity);GO:0004714(transmembrane receptor protein tyrosine kinase activity);GO:0005524(ATP binding);GO:0005634(nucleus);GO:0005654(nucleoplasm);GO:0006468(protein phosphorylation);GO:0007169(transmembrane receptor protein tyrosine kinase signaling pathway);GO:0018108(peptidyl-tyrosine phosphorylation)	NA	NA	hsa-miR-7-2-3p	m8	-0.1255	54	152	-14.92
hsa_circ_0069760	chr4	54280316	54290554	+	7	circRNA	ENST00000507166	AC058822	mRNA	chr4:54278515-54280315|chr4:54290554-54295124	novel FIP1L1-PDGFRA fusion protein	GO:0004672(protein kinase activity);GO:0004713(protein tyrosine kinase activity);GO:0004714(transmembrane receptor protein tyrosine kinase activity);GO:0005524(ATP binding);GO:0005634(nucleus);GO:0005654(nucleoplasm);GO:0006468(protein phosphorylation);GO:0007169(transmembrane receptor protein tyrosine kinase signaling pathway);GO:0018108(peptidyl-tyrosine phosphorylation)	NA	NA	hsa-miR-95-5p	m8	-0.178	66	148	-11.73
circRNA5988	chr1	75745807	75750546	+	3	circRNA	ENST00000529059	ACADM	mRNA	chr1:75740110-75745806|chr1:75750546-75761122	acyl-CoA dehydrogenase medium chain [Source:HGNC Symbol;Acc:HGNC:89]	GO:0001889(liver development);GO:0003995(acyl-CoA dehydrogenase activity);GO:0005634(nucleus);GO:0005739(mitochondrion);GO:0005759(mitochondrial matrix);GO:0005978(glycogen biosynthetic process);GO:0006082(organic acid metabolic process);GO:0006111(regulation of gluconeogenesis);GO:0006629(lipid metabolic process);GO:0006631(fatty acid metabolic process);GO:0006635(fatty acid beta-oxidation);GO:0…	00071(Fatty acid degradation);00280(Valine, leucine and isoleucine degradation);00410(beta-Alanine metabolism);00640(Propanoate metabolism);03320(PPAR signaling pathway)	NA	hsa-miR-28-5p	m8	-0.273	95	143	-12.84
circRNA5988	chr1	75745807	75750546	+	3	circRNA	ENST00000529059	ACADM	mRNA	chr1:75740110-75745806|chr1:75750546-75761122	acyl-CoA dehydrogenase medium chain [Source:HGNC Symbol;Acc:HGNC:89]	GO:0001889(liver development);GO:0003995(acyl-CoA dehydrogenase activity);GO:0005634(nucleus);GO:0005739(mitochondrion);GO:0005759(mitochondrial matrix);GO:0005978(glycogen biosynthetic process);GO:0006082(organic acid metabolic process);GO:0006111(regulation of gluconeogenesis);GO:0006629(lipid metabolic process);GO:0006631(fatty acid metabolic process);GO:0006635(fatty acid beta-oxidation);GO:0…	00071(Fatty acid degradation);00280(Valine, leucine and isoleucine degradation);00410(beta-Alanine metabolism);00640(Propanoate metabolism);03320(PPAR signaling pathway)	NA	hsa-miR-29a-3p	m8	-0.118	52	144	-16.62
circRNA5988	chr1	75745807	75750546	+	3	circRNA	ENST00000529059	ACADM	mRNA	chr1:75740110-75745806|chr1:75750546-75761122	acyl-CoA dehydrogenase medium chain [Source:HGNC Symbol;Acc:HGNC:89]	GO:0001889(liver development);GO:0003995(acyl-CoA dehydrogenase activity);GO:0005634(nucleus);GO:0005739(mitochondrion);GO:0005759(mitochondrial matrix);GO:0005978(glycogen biosynthetic process);GO:0006082(organic acid metabolic process);GO:0006111(regulation of gluconeogenesis);GO:0006629(lipid metabolic process);GO:0006631(fatty acid metabolic process);GO:0006635(fatty acid beta-oxidation);GO:0…	00071(Fatty acid degradation);00280(Valine, leucine and isoleucine degradation);00410(beta-Alanine metabolism);00640(Propanoate metabolism);03320(PPAR signaling pathway)	NA	hsa-miR-29b-1-5p	8mer	-0.4172	97	151	-12.54
circRNA5988	chr1	75745807	75750546	+	3	circRNA	ENST00000529059	ACADM	mRNA	chr1:75740110-75745806|chr1:75750546-75761122	acyl-CoA dehydrogenase medium chain [Source:HGNC Symbol;Acc:HGNC:89]	GO:0001889(liver development);GO:0003995(acyl-CoA dehydrogenase activity);GO:0005634(nucleus);GO:0005739(mitochondrion);GO:0005759(mitochondrial matrix);GO:0005978(glycogen biosynthetic process);GO:0006082(organic acid metabolic process);GO:0006111(regulation of gluconeogenesis);GO:0006629(lipid metabolic process);GO:0006631(fatty acid metabolic process);GO:0006635(fatty acid beta-oxidation);GO:0…	00071(Fatty acid degradation);00280(Valine, leucine and isoleucine degradation);00410(beta-Alanine metabolism);00640(Propanoate metabolism);03320(PPAR signaling pathway)	NA	hsa-miR-29b-3p	m8	-0.1335	58	142	-16.38
circRNA12218	chr15	88843356	88845624	+	2	circRNA	ENST00000352105	ACAN	mRNA	chr15:88841867-88843355|chr15:88845882-88847243	aggrecan [Source:HGNC Symbol;Acc:HGNC:319]	GO:0001501(skeletal system development);GO:0001502(cartilage condensation);GO:0002063(chondrocyte development);GO:0005201(extracellular matrix structural constituent);GO:0005509(calcium ion binding);GO:0005515(protein binding);GO:0005540(hyaluronic acid binding);GO:0005576(extracellular region);GO:0005604(basement membrane);GO:0005796(Golgi lumen);GO:0006508(proteolysis);GO:0007155(cell adhesion)…	NA	NA	hsa-miR-132-5p	m8	-0.073	52	140	-18.66
circRNA12218	chr15	88843356	88845624	+	2	circRNA	ENST00000352105	ACAN	mRNA	chr15:88841867-88843355|chr15:88845882-88847243	aggrecan [Source:HGNC Symbol;Acc:HGNC:319]	GO:0001501(skeletal system development);GO:0001502(cartilage condensation);GO:0002063(chondrocyte development);GO:0005201(extracellular matrix structural constituent);GO:0005509(calcium ion binding);GO:0005515(protein binding);GO:0005540(hyaluronic acid binding);GO:0005576(extracellular region);GO:0005604(basement membrane);GO:0005796(Golgi lumen);GO:0006508(proteolysis);GO:0007155(cell adhesion)…	NA	NA	hsa-miR-205-3p	8mer	-0.1834	79	156	-18.83
circRNA12218	chr15	88843356	88845624	+	2	circRNA	ENST00000352105	ACAN	mRNA	chr15:88841867-88843355|chr15:88845882-88847243	aggrecan [Source:HGNC Symbol;Acc:HGNC:319]	GO:0001501(skeletal system development);GO:0001502(cartilage condensation);GO:0002063(chondrocyte development);GO:0005201(extracellular matrix structural constituent);GO:0005509(calcium ion binding);GO:0005515(protein binding);GO:0005540(hyaluronic acid binding);GO:0005576(extracellular region);GO:0005604(basement membrane);GO:0005796(Golgi lumen);GO:0006508(proteolysis);GO:0007155(cell adhesion)…	NA	NA	hsa-miR-221-5p	m8	-0.164	81	148	-15.72
circRNA5188	chr15	88848005	88849669	-	2	circRNA	ENST00000561243	ACAN	mRNA	chr15:88847417-88847911|chr15:88849731-88851794	aggrecan [Source:HGNC Symbol;Acc:HGNC:319]	GO:0001501(skeletal system development);GO:0001502(cartilage condensation);GO:0002063(chondrocyte development);GO:0005201(extracellular matrix structural constituent);GO:0005509(calcium ion binding);GO:0005515(protein binding);GO:0005540(hyaluronic acid binding);GO:0005576(extracellular region);GO:0005604(basement membrane);GO:0005796(Golgi lumen);GO:0006508(proteolysis);GO:0007155(cell adhesion)…	NA	NA	hsa-miR-23a-3p	m8	-0.18	73	148	-15.67
circRNA12218	chr15	88843356	88845624	+	2	circRNA	ENST00000352105	ACAN	mRNA	chr15:88841867-88843355|chr15:88845882-88847243	aggrecan [Source:HGNC Symbol;Acc:HGNC:319]	GO:0001501(skeletal system development);GO:0001502(cartilage condensation);GO:0002063(chondrocyte development);GO:0005201(extracellular matrix structural constituent);GO:0005509(calcium ion binding);GO:0005515(protein binding);GO:0005540(hyaluronic acid binding);GO:0005576(extracellular region);GO:0005604(basement membrane);GO:0005796(Golgi lumen);GO:0006508(proteolysis);GO:0007155(cell adhesion)…	NA	NA	hsa-miR-23a-5p	m8	-0.1545	76	173	-33.2
circRNA5188	chr15	88848005	88849669	-	2	circRNA	ENST00000561243	ACAN	mRNA	chr15:88847417-88847911|chr15:88849731-88851794	aggrecan [Source:HGNC Symbol;Acc:HGNC:319]	GO:0001501(skeletal system development);GO:0001502(cartilage condensation);GO:0002063(chondrocyte development);GO:0005201(extracellular matrix structural constituent);GO:0005509(calcium ion binding);GO:0005515(protein binding);GO:0005540(hyaluronic acid binding);GO:0005576(extracellular region);GO:0005604(basement membrane);GO:0005796(Golgi lumen);GO:0006508(proteolysis);GO:0007155(cell adhesion)…	NA	NA	hsa-miR-23b-3p	m8	-0.18	73	145	-16.9
circRNA12218	chr15	88843356	88845624	+	2	circRNA	ENST00000352105	ACAN	mRNA	chr15:88841867-88843355|chr15:88845882-88847243	aggrecan [Source:HGNC Symbol;Acc:HGNC:319]	GO:0001501(skeletal system development);GO:0001502(cartilage condensation);GO:0002063(chondrocyte development);GO:0005201(extracellular matrix structural constituent);GO:0005509(calcium ion binding);GO:0005515(protein binding);GO:0005540(hyaluronic acid binding);GO:0005576(extracellular region);GO:0005604(basement membrane);GO:0005796(Golgi lumen);GO:0006508(proteolysis);GO:0007155(cell adhesion)…	NA	NA	hsa-miR-23b-5p	m8	-0.108	62	148	-22.69
circRNA5188	chr15	88848005	88849669	-	2	circRNA	ENST00000561243	ACAN	mRNA	chr15:88847417-88847911|chr15:88849731-88851794	aggrecan [Source:HGNC Symbol;Acc:HGNC:319]	GO:0001501(skeletal system development);GO:0001502(cartilage condensation);GO:0002063(chondrocyte development);GO:0005201(extracellular matrix structural constituent);GO:0005509(calcium ion binding);GO:0005515(protein binding);GO:0005540(hyaluronic acid binding);GO:0005576(extracellular region);GO:0005604(basement membrane);GO:0005796(Golgi lumen);GO:0006508(proteolysis);GO:0007155(cell adhesion)…	NA	NA	hsa-miR-31-3p	8mer	-0.15015	75	148	-18.3
circRNA12218	chr15	88843356	88845624	+	2	circRNA	ENST00000352105	ACAN	mRNA	chr15:88841867-88843355|chr15:88845882-88847243	aggrecan [Source:HGNC Symbol;Acc:HGNC:319]	GO:0001501(skeletal system development);GO:0001502(cartilage condensation);GO:0002063(chondrocyte development);GO:0005201(extracellular matrix structural constituent);GO:0005509(calcium ion binding);GO:0005515(protein binding);GO:0005540(hyaluronic acid binding);GO:0005576(extracellular region);GO:0005604(basement membrane);GO:0005796(Golgi lumen);GO:0006508(proteolysis);GO:0007155(cell adhesion)…	NA	NA	hsa-miR-34a-5p	m8	-0.107	53	149	-19.29
circRNA5188	chr15	88848005	88849669	-	2	circRNA	ENST00000561243	ACAN	mRNA	chr15:88847417-88847911|chr15:88849731-88851794	aggrecan [Source:HGNC Symbol;Acc:HGNC:319]	GO:0001501(skeletal system development);GO:0001502(cartilage condensation);GO:0002063(chondrocyte development);GO:0005201(extracellular matrix structural constituent);GO:0005509(calcium ion binding);GO:0005515(protein binding);GO:0005540(hyaluronic acid binding);GO:0005576(extracellular region);GO:0005604(basement membrane);GO:0005796(Golgi lumen);GO:0006508(proteolysis);GO:0007155(cell adhesion)…	NA	NA	hsa-miR-92a-2-5p	m8	-0.0955	67	148	-20.24
circRNA2842	chr5	65188016	65291470	-	12	circRNA	ENST00000381055	ADAMTS6	mRNA	chr5:65173008-65188015|chr5:65291470-65299984	ADAM metallopeptidase with thrombospondin type 1 motif 6 [Source:HGNC Symbol;Acc:HGNC:222]	GO:0001822(kidney development);GO:0003279(cardiac septum development);GO:0004222(metalloendopeptidase activity);GO:0005576(extracellular region);GO:0006508(proteolysis);GO:0007507(heart development);GO:0008233(peptidase activity);GO:0008237(metallopeptidase activity);GO:0016787(hydrolase activity);GO:0030198(extracellular matrix organization);GO:0031012(extracellular matrix);GO:0035904(aorta deve…	NA	NA	hsa-let-7a-5p	8mer	-0.2581	89	143	-16.62
circRNA2842	chr5	65188016	65291470	-	12	circRNA	ENST00000381055	ADAMTS6	mRNA	chr5:65173008-65188015|chr5:65291470-65299984	ADAM metallopeptidase with thrombospondin type 1 motif 6 [Source:HGNC Symbol;Acc:HGNC:222]	GO:0001822(kidney development);GO:0003279(cardiac septum development);GO:0004222(metalloendopeptidase activity);GO:0005576(extracellular region);GO:0006508(proteolysis);GO:0007507(heart development);GO:0008233(peptidase activity);GO:0008237(metallopeptidase activity);GO:0016787(hydrolase activity);GO:0030198(extracellular matrix organization);GO:0031012(extracellular matrix);GO:0035904(aorta deve…	NA	NA	hsa-let-7b-5p	8mer	-0.2581	90	146	-16.11
circRNA2842	chr5	65188016	65291470	-	12	circRNA	ENST00000381055	ADAMTS6	mRNA	chr5:65173008-65188015|chr5:65291470-65299984	ADAM metallopeptidase with thrombospondin type 1 motif 6 [Source:HGNC Symbol;Acc:HGNC:222]	GO:0001822(kidney development);GO:0003279(cardiac septum development);GO:0004222(metalloendopeptidase activity);GO:0005576(extracellular region);GO:0006508(proteolysis);GO:0007507(heart development);GO:0008233(peptidase activity);GO:0008237(metallopeptidase activity);GO:0016787(hydrolase activity);GO:0030198(extracellular matrix organization);GO:0031012(extracellular matrix);GO:0035904(aorta deve…	NA	NA	hsa-let-7c-5p	8mer	-0.2581	89	143	-15.76
circRNA2842	chr5	65188016	65291470	-	12	circRNA	ENST00000381055	ADAMTS6	mRNA	chr5:65173008-65188015|chr5:65291470-65299984	ADAM metallopeptidase with thrombospondin type 1 motif 6 [Source:HGNC Symbol;Acc:HGNC:222]	GO:0001822(kidney development);GO:0003279(cardiac septum development);GO:0004222(metalloendopeptidase activity);GO:0005576(extracellular region);GO:0006508(proteolysis);GO:0007507(heart development);GO:0008233(peptidase activity);GO:0008237(metallopeptidase activity);GO:0016787(hydrolase activity);GO:0030198(extracellular matrix organization);GO:0031012(extracellular matrix);GO:0035904(aorta deve…	NA	NA	hsa-let-7d-5p	8mer	-0.2622	90	143	-13.87
circRNA2842	chr5	65188016	65291470	-	12	circRNA	ENST00000381055	ADAMTS6	mRNA	chr5:65173008-65188015|chr5:65291470-65299984	ADAM metallopeptidase with thrombospondin type 1 motif 6 [Source:HGNC Symbol;Acc:HGNC:222]	GO:0001822(kidney development);GO:0003279(cardiac septum development);GO:0004222(metalloendopeptidase activity);GO:0005576(extracellular region);GO:0006508(proteolysis);GO:0007507(heart development);GO:0008233(peptidase activity);GO:0008237(metallopeptidase activity);GO:0016787(hydrolase activity);GO:0030198(extracellular matrix organization);GO:0031012(extracellular matrix);GO:0035904(aorta deve…	NA	NA	hsa-let-7e-5p	8mer	-0.2581	89	151	-20.09
circRNA2842	chr5	65188016	65291470	-	12	circRNA	ENST00000381055	ADAMTS6	mRNA	chr5:65173008-65188015|chr5:65291470-65299984	ADAM metallopeptidase with thrombospondin type 1 motif 6 [Source:HGNC Symbol;Acc:HGNC:222]	GO:0001822(kidney development);GO:0003279(cardiac septum development);GO:0004222(metalloendopeptidase activity);GO:0005576(extracellular region);GO:0006508(proteolysis);GO:0007507(heart development);GO:0008233(peptidase activity);GO:0008237(metallopeptidase activity);GO:0016787(hydrolase activity);GO:0030198(extracellular matrix organization);GO:0031012(extracellular matrix);GO:0035904(aorta deve…	NA	NA	hsa-let-7f-5p	8mer	-0.2581	89	147	-16.21
circRNA2842	chr5	65188016	65291470	-	12	circRNA	ENST00000381055	ADAMTS6	mRNA	chr5:65173008-65188015|chr5:65291470-65299984	ADAM metallopeptidase with thrombospondin type 1 motif 6 [Source:HGNC Symbol;Acc:HGNC:222]	GO:0001822(kidney development);GO:0003279(cardiac septum development);GO:0004222(metalloendopeptidase activity);GO:0005576(extracellular region);GO:0006508(proteolysis);GO:0007507(heart development);GO:0008233(peptidase activity);GO:0008237(metallopeptidase activity);GO:0016787(hydrolase activity);GO:0030198(extracellular matrix organization);GO:0031012(extracellular matrix);GO:0035904(aorta deve…	NA	NA	hsa-let-7g-5p	8mer	-0.2581	89	147	-15.67
circRNA2842	chr5	65188016	65291470	-	12	circRNA	ENST00000381055	ADAMTS6	mRNA	chr5:65173008-65188015|chr5:65291470-65299984	ADAM metallopeptidase with thrombospondin type 1 motif 6 [Source:HGNC Symbol;Acc:HGNC:222]	GO:0001822(kidney development);GO:0003279(cardiac septum development);GO:0004222(metalloendopeptidase activity);GO:0005576(extracellular region);GO:0006508(proteolysis);GO:0007507(heart development);GO:0008233(peptidase activity);GO:0008237(metallopeptidase activity);GO:0016787(hydrolase activity);GO:0030198(extracellular matrix organization);GO:0031012(extracellular matrix);GO:0035904(aorta deve…	NA	NA	hsa-let-7i-5p	8mer	-0.26015	90	159	-18.1
circRNA2845	chr5	65242104	65473952	-	14	circRNA	ENST00000381055	ADAMTS6	mRNA	chr5:65226219-65242103|chr5:65473952-65481342	ADAM metallopeptidase with thrombospondin type 1 motif 6 [Source:HGNC Symbol;Acc:HGNC:222]	GO:0001822(kidney development);GO:0003279(cardiac septum development);GO:0004222(metalloendopeptidase activity);GO:0005576(extracellular region);GO:0006508(proteolysis);GO:0007507(heart development);GO:0008233(peptidase activity);GO:0008237(metallopeptidase activity);GO:0016787(hydrolase activity);GO:0030198(extracellular matrix organization);GO:0031012(extracellular matrix);GO:0035904(aorta deve…	NA	NA	hsa-miR-106a-3p	m8	-0.136	64	151	-11.25
circRNA2845	chr5	65242104	65473952	-	14	circRNA	ENST00000381055	ADAMTS6	mRNA	chr5:65226219-65242103|chr5:65473952-65481342	ADAM metallopeptidase with thrombospondin type 1 motif 6 [Source:HGNC Symbol;Acc:HGNC:222]	GO:0001822(kidney development);GO:0003279(cardiac septum development);GO:0004222(metalloendopeptidase activity);GO:0005576(extracellular region);GO:0006508(proteolysis);GO:0007507(heart development);GO:0008233(peptidase activity);GO:0008237(metallopeptidase activity);GO:0016787(hydrolase activity);GO:0030198(extracellular matrix organization);GO:0031012(extracellular matrix);GO:0035904(aorta deve…	NA	NA	hsa-miR-106a-5p	m8	-0.1895	84	158	-15.43
circRNA2842	chr5	65188016	65291470	-	12	circRNA	ENST00000381055	ADAMTS6	mRNA	chr5:65173008-65188015|chr5:65291470-65299984	ADAM metallopeptidase with thrombospondin type 1 motif 6 [Source:HGNC Symbol;Acc:HGNC:222]	GO:0001822(kidney development);GO:0003279(cardiac septum development);GO:0004222(metalloendopeptidase activity);GO:0005576(extracellular region);GO:0006508(proteolysis);GO:0007507(heart development);GO:0008233(peptidase activity);GO:0008237(metallopeptidase activity);GO:0016787(hydrolase activity);GO:0030198(extracellular matrix organization);GO:0031012(extracellular matrix);GO:0035904(aorta deve…	NA	NA	hsa-miR-10b-3p	1a	-0.12865	52	147	-20.89
circRNA2842	chr5	65188016	65291470	-	12	circRNA	ENST00000381055	ADAMTS6	mRNA	chr5:65173008-65188015|chr5:65291470-65299984	ADAM metallopeptidase with thrombospondin type 1 motif 6 [Source:HGNC Symbol;Acc:HGNC:222]	GO:0001822(kidney development);GO:0003279(cardiac septum development);GO:0004222(metalloendopeptidase activity);GO:0005576(extracellular region);GO:0006508(proteolysis);GO:0007507(heart development);GO:0008233(peptidase activity);GO:0008237(metallopeptidase activity);GO:0016787(hydrolase activity);GO:0030198(extracellular matrix organization);GO:0031012(extracellular matrix);GO:0035904(aorta deve…	NA	NA	hsa-miR-128-1-5p	1a	-0.0873	74	142	-22.85
circRNA2845	chr5	65242104	65473952	-	14	circRNA	ENST00000381055	ADAMTS6	mRNA	chr5:65226219-65242103|chr5:65473952-65481342	ADAM metallopeptidase with thrombospondin type 1 motif 6 [Source:HGNC Symbol;Acc:HGNC:222]	GO:0001822(kidney development);GO:0003279(cardiac septum development);GO:0004222(metalloendopeptidase activity);GO:0005576(extracellular region);GO:0006508(proteolysis);GO:0007507(heart development);GO:0008233(peptidase activity);GO:0008237(metallopeptidase activity);GO:0016787(hydrolase activity);GO:0030198(extracellular matrix organization);GO:0031012(extracellular matrix);GO:0035904(aorta deve…	NA	NA	hsa-miR-128-1-5p	1a	-0.05865	59	142	-22.85
circRNA2842	chr5	65188016	65291470	-	12	circRNA	ENST00000381055	ADAMTS6	mRNA	chr5:65173008-65188015|chr5:65291470-65299984	ADAM metallopeptidase with thrombospondin type 1 motif 6 [Source:HGNC Symbol;Acc:HGNC:222]	GO:0001822(kidney development);GO:0003279(cardiac septum development);GO:0004222(metalloendopeptidase activity);GO:0005576(extracellular region);GO:0006508(proteolysis);GO:0007507(heart development);GO:0008233(peptidase activity);GO:0008237(metallopeptidase activity);GO:0016787(hydrolase activity);GO:0030198(extracellular matrix organization);GO:0031012(extracellular matrix);GO:0035904(aorta deve…	NA	NA	hsa-miR-128-3p	8mer	-0.2972	95	144	-16.68
circRNA2845	chr5	65242104	65473952	-	14	circRNA	ENST00000381055	ADAMTS6	mRNA	chr5:65226219-65242103|chr5:65473952-65481342	ADAM metallopeptidase with thrombospondin type 1 motif 6 [Source:HGNC Symbol;Acc:HGNC:222]	GO:0001822(kidney development);GO:0003279(cardiac septum development);GO:0004222(metalloendopeptidase activity);GO:0005576(extracellular region);GO:0006508(proteolysis);GO:0007507(heart development);GO:0008233(peptidase activity);GO:0008237(metallopeptidase activity);GO:0016787(hydrolase activity);GO:0030198(extracellular matrix organization);GO:0031012(extracellular matrix);GO:0035904(aorta deve…	NA	NA	hsa-miR-128-3p	1a	-0.1371	68	144	-16.68
circRNA7738	chr5	65242104	65273447	-	4	circRNA	ENST00000381055	ADAMTS6	mRNA	chr5:65226219-65242103|chr5:65273447-65291328	ADAM metallopeptidase with thrombospondin type 1 motif 6 [Source:HGNC Symbol;Acc:HGNC:222]	GO:0001822(kidney development);GO:0003279(cardiac septum development);GO:0004222(metalloendopeptidase activity);GO:0005576(extracellular region);GO:0006508(proteolysis);GO:0007507(heart development);GO:0008233(peptidase activity);GO:0008237(metallopeptidase activity);GO:0016787(hydrolase activity);GO:0030198(extracellular matrix organization);GO:0031012(extracellular matrix);GO:0035904(aorta deve…	NA	NA	hsa-miR-128-3p	m8	-0.189	84	144	-16.68
circRNA2845	chr5	65242104	65473952	-	14	circRNA	ENST00000381055	ADAMTS6	mRNA	chr5:65226219-65242103|chr5:65473952-65481342	ADAM metallopeptidase with thrombospondin type 1 motif 6 [Source:HGNC Symbol;Acc:HGNC:222]	GO:0001822(kidney development);GO:0003279(cardiac septum development);GO:0004222(metalloendopeptidase activity);GO:0005576(extracellular region);GO:0006508(proteolysis);GO:0007507(heart development);GO:0008233(peptidase activity);GO:0008237(metallopeptidase activity);GO:0016787(hydrolase activity);GO:0030198(extracellular matrix organization);GO:0031012(extracellular matrix);GO:0035904(aorta deve…	NA	NA	hsa-miR-129-5p	1a	-0.11775	63	146	-22.2
circRNA2845	chr5	65242104	65473952	-	14	circRNA	ENST00000381055	ADAMTS6	mRNA	chr5:65226219-65242103|chr5:65473952-65481342	ADAM metallopeptidase with thrombospondin type 1 motif 6 [Source:HGNC Symbol;Acc:HGNC:222]	GO:0001822(kidney development);GO:0003279(cardiac septum development);GO:0004222(metalloendopeptidase activity);GO:0005576(extracellular region);GO:0006508(proteolysis);GO:0007507(heart development);GO:0008233(peptidase activity);GO:0008237(metallopeptidase activity);GO:0016787(hydrolase activity);GO:0030198(extracellular matrix organization);GO:0031012(extracellular matrix);GO:0035904(aorta deve…	NA	NA	hsa-miR-133a-5p	m8	-0.202	84	140	-12.51
circRNA2845	chr5	65242104	65473952	-	14	circRNA	ENST00000381055	ADAMTS6	mRNA	chr5:65226219-65242103|chr5:65473952-65481342	ADAM metallopeptidase with thrombospondin type 1 motif 6 [Source:HGNC Symbol;Acc:HGNC:222]	GO:0001822(kidney development);GO:0003279(cardiac septum development);GO:0004222(metalloendopeptidase activity);GO:0005576(extracellular region);GO:0006508(proteolysis);GO:0007507(heart development);GO:0008233(peptidase activity);GO:0008237(metallopeptidase activity);GO:0016787(hydrolase activity);GO:0030198(extracellular matrix organization);GO:0031012(extracellular matrix);GO:0035904(aorta deve…	NA	NA	hsa-miR-135a-3p	1a	-0.1232	55	141	-21.73
circRNA7738	chr5	65242104	65273447	-	4	circRNA	ENST00000381055	ADAMTS6	mRNA	chr5:65226219-65242103|chr5:65273447-65291328	ADAM metallopeptidase with thrombospondin type 1 motif 6 [Source:HGNC Symbol;Acc:HGNC:222]	GO:0001822(kidney development);GO:0003279(cardiac septum development);GO:0004222(metalloendopeptidase activity);GO:0005576(extracellular region);GO:0006508(proteolysis);GO:0007507(heart development);GO:0008233(peptidase activity);GO:0008237(metallopeptidase activity);GO:0016787(hydrolase activity);GO:0030198(extracellular matrix organization);GO:0031012(extracellular matrix);GO:0035904(aorta deve…	NA	NA	hsa-miR-135a-3p	1a	-0.1232	55	141	-21.73
circRNA2842	chr5	65188016	65291470	-	12	circRNA	ENST00000381055	ADAMTS6	mRNA	chr5:65173008-65188015|chr5:65291470-65299984	ADAM metallopeptidase with thrombospondin type 1 motif 6 [Source:HGNC Symbol;Acc:HGNC:222]	GO:0001822(kidney development);GO:0003279(cardiac septum development);GO:0004222(metalloendopeptidase activity);GO:0005576(extracellular region);GO:0006508(proteolysis);GO:0007507(heart development);GO:0008233(peptidase activity);GO:0008237(metallopeptidase activity);GO:0016787(hydrolase activity);GO:0030198(extracellular matrix organization);GO:0031012(extracellular matrix);GO:0035904(aorta deve…	NA	NA	hsa-miR-139-3p	m8	-0.0815	60	159	-30.1
circRNA2845	chr5	65242104	65473952	-	14	circRNA	ENST00000381055	ADAMTS6	mRNA	chr5:65226219-65242103|chr5:65473952-65481342	ADAM metallopeptidase with thrombospondin type 1 motif 6 [Source:HGNC Symbol;Acc:HGNC:222]	GO:0001822(kidney development);GO:0003279(cardiac septum development);GO:0004222(metalloendopeptidase activity);GO:0005576(extracellular region);GO:0006508(proteolysis);GO:0007507(heart development);GO:0008233(peptidase activity);GO:0008237(metallopeptidase activity);GO:0016787(hydrolase activity);GO:0030198(extracellular matrix organization);GO:0031012(extracellular matrix);GO:0035904(aorta deve…	NA	NA	hsa-miR-139-3p	m8	-0.0965	69	159	-30.1
circRNA7738	chr5	65242104	65273447	-	4	circRNA	ENST00000381055	ADAMTS6	mRNA	chr5:65226219-65242103|chr5:65273447-65291328	ADAM metallopeptidase with thrombospondin type 1 motif 6 [Source:HGNC Symbol;Acc:HGNC:222]	GO:0001822(kidney development);GO:0003279(cardiac septum development);GO:0004222(metalloendopeptidase activity);GO:0005576(extracellular region);GO:0006508(proteolysis);GO:0007507(heart development);GO:0008233(peptidase activity);GO:0008237(metallopeptidase activity);GO:0016787(hydrolase activity);GO:0030198(extracellular matrix organization);GO:0031012(extracellular matrix);GO:0035904(aorta deve…	NA	NA	hsa-miR-139-3p	m8	-0.0965	69	159	-30.1
circRNA2842	chr5	65188016	65291470	-	12	circRNA	ENST00000381055	ADAMTS6	mRNA	chr5:65173008-65188015|chr5:65291470-65299984	ADAM metallopeptidase with thrombospondin type 1 motif 6 [Source:HGNC Symbol;Acc:HGNC:222]	GO:0001822(kidney development);GO:0003279(cardiac septum development);GO:0004222(metalloendopeptidase activity);GO:0005576(extracellular region);GO:0006508(proteolysis);GO:0007507(heart development);GO:0008233(peptidase activity);GO:0008237(metallopeptidase activity);GO:0016787(hydrolase activity);GO:0030198(extracellular matrix organization);GO:0031012(extracellular matrix);GO:0035904(aorta deve…	NA	NA	hsa-miR-15b-3p	8mer	-0.23115	84	145	-11.51
circRNA2845	chr5	65242104	65473952	-	14	circRNA	ENST00000381055	ADAMTS6	mRNA	chr5:65226219-65242103|chr5:65473952-65481342	ADAM metallopeptidase with thrombospondin type 1 motif 6 [Source:HGNC Symbol;Acc:HGNC:222]	GO:0001822(kidney development);GO:0003279(cardiac septum development);GO:0004222(metalloendopeptidase activity);GO:0005576(extracellular region);GO:0006508(proteolysis);GO:0007507(heart development);GO:0008233(peptidase activity);GO:0008237(metallopeptidase activity);GO:0016787(hydrolase activity);GO:0030198(extracellular matrix organization);GO:0031012(extracellular matrix);GO:0035904(aorta deve…	NA	NA	hsa-miR-16-2-3p	m8	-0.153	62	154	-16.61
circRNA2845	chr5	65242104	65473952	-	14	circRNA	ENST00000381055	ADAMTS6	mRNA	chr5:65226219-65242103|chr5:65473952-65481342	ADAM metallopeptidase with thrombospondin type 1 motif 6 [Source:HGNC Symbol;Acc:HGNC:222]	GO:0001822(kidney development);GO:0003279(cardiac septum development);GO:0004222(metalloendopeptidase activity);GO:0005576(extracellular region);GO:0006508(proteolysis);GO:0007507(heart development);GO:0008233(peptidase activity);GO:0008237(metallopeptidase activity);GO:0016787(hydrolase activity);GO:0030198(extracellular matrix organization);GO:0031012(extracellular matrix);GO:0035904(aorta deve…	NA	NA	hsa-miR-17-5p	m8	-0.1895	84	158	-15.05
circRNA2845	chr5	65242104	65473952	-	14	circRNA	ENST00000381055	ADAMTS6	mRNA	chr5:65226219-65242103|chr5:65473952-65481342	ADAM metallopeptidase with thrombospondin type 1 motif 6 [Source:HGNC Symbol;Acc:HGNC:222]	GO:0001822(kidney development);GO:0003279(cardiac septum development);GO:0004222(metalloendopeptidase activity);GO:0005576(extracellular region);GO:0006508(proteolysis);GO:0007507(heart development);GO:0008233(peptidase activity);GO:0008237(metallopeptidase activity);GO:0016787(hydrolase activity);GO:0030198(extracellular matrix organization);GO:0031012(extracellular matrix);GO:0035904(aorta deve…	NA	NA	hsa-miR-182-5p	8mer	-0.2273	82	166	-24.39
circRNA2842	chr5	65188016	65291470	-	12	circRNA	ENST00000381055	ADAMTS6	mRNA	chr5:65173008-65188015|chr5:65291470-65299984	ADAM metallopeptidase with thrombospondin type 1 motif 6 [Source:HGNC Symbol;Acc:HGNC:222]	GO:0001822(kidney development);GO:0003279(cardiac septum development);GO:0004222(metalloendopeptidase activity);GO:0005576(extracellular region);GO:0006508(proteolysis);GO:0007507(heart development);GO:0008233(peptidase activity);GO:0008237(metallopeptidase activity);GO:0016787(hydrolase activity);GO:0030198(extracellular matrix organization);GO:0031012(extracellular matrix);GO:0035904(aorta deve…	NA	NA	hsa-miR-18a-3p	m8	-0.187	87	159	-24.88
circRNA2842	chr5	65188016	65291470	-	12	circRNA	ENST00000381055	ADAMTS6	mRNA	chr5:65173008-65188015|chr5:65291470-65299984	ADAM metallopeptidase with thrombospondin type 1 motif 6 [Source:HGNC Symbol;Acc:HGNC:222]	GO:0001822(kidney development);GO:0003279(cardiac septum development);GO:0004222(metalloendopeptidase activity);GO:0005576(extracellular region);GO:0006508(proteolysis);GO:0007507(heart development);GO:0008233(peptidase activity);GO:0008237(metallopeptidase activity);GO:0016787(hydrolase activity);GO:0030198(extracellular matrix organization);GO:0031012(extracellular matrix);GO:0035904(aorta deve…	NA	NA	hsa-miR-18a-5p	m8	-0.139	65	145	-16.65
circRNA2845	chr5	65242104	65473952	-	14	circRNA	ENST00000381055	ADAMTS6	mRNA	chr5:65226219-65242103|chr5:65473952-65481342	ADAM metallopeptidase with thrombospondin type 1 motif 6 [Source:HGNC Symbol;Acc:HGNC:222]	GO:0001822(kidney development);GO:0003279(cardiac septum development);GO:0004222(metalloendopeptidase activity);GO:0005576(extracellular region);GO:0006508(proteolysis);GO:0007507(heart development);GO:0008233(peptidase activity);GO:0008237(metallopeptidase activity);GO:0016787(hydrolase activity);GO:0030198(extracellular matrix organization);GO:0031012(extracellular matrix);GO:0035904(aorta deve…	NA	NA	hsa-miR-18a-5p	m8	-0.16	73	145	-16.65
circRNA7738	chr5	65242104	65273447	-	4	circRNA	ENST00000381055	ADAMTS6	mRNA	chr5:65226219-65242103|chr5:65273447-65291328	ADAM metallopeptidase with thrombospondin type 1 motif 6 [Source:HGNC Symbol;Acc:HGNC:222]	GO:0001822(kidney development);GO:0003279(cardiac septum development);GO:0004222(metalloendopeptidase activity);GO:0005576(extracellular region);GO:0006508(proteolysis);GO:0007507(heart development);GO:0008233(peptidase activity);GO:0008237(metallopeptidase activity);GO:0016787(hydrolase activity);GO:0030198(extracellular matrix organization);GO:0031012(extracellular matrix);GO:0035904(aorta deve…	NA	NA	hsa-miR-18a-5p	m8	-0.16	73	145	-16.65
circRNA2842	chr5	65188016	65291470	-	12	circRNA	ENST00000381055	ADAMTS6	mRNA	chr5:65173008-65188015|chr5:65291470-65299984	ADAM metallopeptidase with thrombospondin type 1 motif 6 [Source:HGNC Symbol;Acc:HGNC:222]	GO:0001822(kidney development);GO:0003279(cardiac septum development);GO:0004222(metalloendopeptidase activity);GO:0005576(extracellular region);GO:0006508(proteolysis);GO:0007507(heart development);GO:0008233(peptidase activity);GO:0008237(metallopeptidase activity);GO:0016787(hydrolase activity);GO:0030198(extracellular matrix organization);GO:0031012(extracellular matrix);GO:0035904(aorta deve…	NA	NA	hsa-miR-196a-3p	1a	-0.15785	75	148	-17.72
circRNA2845	chr5	65242104	65473952	-	14	circRNA	ENST00000381055	ADAMTS6	mRNA	chr5:65226219-65242103|chr5:65473952-65481342	ADAM metallopeptidase with thrombospondin type 1 motif 6 [Source:HGNC Symbol;Acc:HGNC:222]	GO:0001822(kidney development);GO:0003279(cardiac septum development);GO:0004222(metalloendopeptidase activity);GO:0005576(extracellular region);GO:0006508(proteolysis);GO:0007507(heart development);GO:0008233(peptidase activity);GO:0008237(metallopeptidase activity);GO:0016787(hydrolase activity);GO:0030198(extracellular matrix organization);GO:0031012(extracellular matrix);GO:0035904(aorta deve…	NA	NA	hsa-miR-196a-3p	8mer	-0.32005	95	147	-11.68
circRNA2845	chr5	65242104	65473952	-	14	circRNA	ENST00000381055	ADAMTS6	mRNA	chr5:65226219-65242103|chr5:65473952-65481342	ADAM metallopeptidase with thrombospondin type 1 motif 6 [Source:HGNC Symbol;Acc:HGNC:222]	GO:0001822(kidney development);GO:0003279(cardiac septum development);GO:0004222(metalloendopeptidase activity);GO:0005576(extracellular region);GO:0006508(proteolysis);GO:0007507(heart development);GO:0008233(peptidase activity);GO:0008237(metallopeptidase activity);GO:0016787(hydrolase activity);GO:0030198(extracellular matrix organization);GO:0031012(extracellular matrix);GO:0035904(aorta deve…	NA	NA	hsa-miR-19a-5p	m8	-0.18	77	145	-11.54
circRNA2845	chr5	65242104	65473952	-	14	circRNA	ENST00000381055	ADAMTS6	mRNA	chr5:65226219-65242103|chr5:65473952-65481342	ADAM metallopeptidase with thrombospondin type 1 motif 6 [Source:HGNC Symbol;Acc:HGNC:222]	GO:0001822(kidney development);GO:0003279(cardiac septum development);GO:0004222(metalloendopeptidase activity);GO:0005576(extracellular region);GO:0006508(proteolysis);GO:0007507(heart development);GO:0008233(peptidase activity);GO:0008237(metallopeptidase activity);GO:0016787(hydrolase activity);GO:0030198(extracellular matrix organization);GO:0031012(extracellular matrix);GO:0035904(aorta deve…	NA	NA	hsa-miR-19b-1-5p	m8	-0.18	76	152	-15.41
circRNA2845	chr5	65242104	65473952	-	14	circRNA	ENST00000381055	ADAMTS6	mRNA	chr5:65226219-65242103|chr5:65473952-65481342	ADAM metallopeptidase with thrombospondin type 1 motif 6 [Source:HGNC Symbol;Acc:HGNC:222]	GO:0001822(kidney development);GO:0003279(cardiac septum development);GO:0004222(metalloendopeptidase activity);GO:0005576(extracellular region);GO:0006508(proteolysis);GO:0007507(heart development);GO:0008233(peptidase activity);GO:0008237(metallopeptidase activity);GO:0016787(hydrolase activity);GO:0030198(extracellular matrix organization);GO:0031012(extracellular matrix);GO:0035904(aorta deve…	NA	NA	hsa-miR-19b-2-5p	m8	-0.18	76	154	-14.84
circRNA2842	chr5	65188016	65291470	-	12	circRNA	ENST00000381055	ADAMTS6	mRNA	chr5:65173008-65188015|chr5:65291470-65299984	ADAM metallopeptidase with thrombospondin type 1 motif 6 [Source:HGNC Symbol;Acc:HGNC:222]	GO:0001822(kidney development);GO:0003279(cardiac septum development);GO:0004222(metalloendopeptidase activity);GO:0005576(extracellular region);GO:0006508(proteolysis);GO:0007507(heart development);GO:0008233(peptidase activity);GO:0008237(metallopeptidase activity);GO:0016787(hydrolase activity);GO:0030198(extracellular matrix organization);GO:0031012(extracellular matrix);GO:0035904(aorta deve…	NA	NA	hsa-miR-200b-3p	m8	-0.175	70	152	-11.53
circRNA2845	chr5	65242104	65473952	-	14	circRNA	ENST00000381055	ADAMTS6	mRNA	chr5:65226219-65242103|chr5:65473952-65481342	ADAM metallopeptidase with thrombospondin type 1 motif 6 [Source:HGNC Symbol;Acc:HGNC:222]	GO:0001822(kidney development);GO:0003279(cardiac septum development);GO:0004222(metalloendopeptidase activity);GO:0005576(extracellular region);GO:0006508(proteolysis);GO:0007507(heart development);GO:0008233(peptidase activity);GO:0008237(metallopeptidase activity);GO:0016787(hydrolase activity);GO:0030198(extracellular matrix organization);GO:0031012(extracellular matrix);GO:0035904(aorta deve…	NA	NA	hsa-miR-200b-3p	1a	-0.1372	54	152	-18.14
circRNA7738	chr5	65242104	65273447	-	4	circRNA	ENST00000381055	ADAMTS6	mRNA	chr5:65226219-65242103|chr5:65273447-65291328	ADAM metallopeptidase with thrombospondin type 1 motif 6 [Source:HGNC Symbol;Acc:HGNC:222]	GO:0001822(kidney development);GO:0003279(cardiac septum development);GO:0004222(metalloendopeptidase activity);GO:0005576(extracellular region);GO:0006508(proteolysis);GO:0007507(heart development);GO:0008233(peptidase activity);GO:0008237(metallopeptidase activity);GO:0016787(hydrolase activity);GO:0030198(extracellular matrix organization);GO:0031012(extracellular matrix);GO:0035904(aorta deve…	NA	NA	hsa-miR-200b-3p	m8	-0.188	74	152	-11.53
circRNA2842	chr5	65188016	65291470	-	12	circRNA	ENST00000381055	ADAMTS6	mRNA	chr5:65173008-65188015|chr5:65291470-65299984	ADAM metallopeptidase with thrombospondin type 1 motif 6 [Source:HGNC Symbol;Acc:HGNC:222]	GO:0001822(kidney development);GO:0003279(cardiac septum development);GO:0004222(metalloendopeptidase activity);GO:0005576(extracellular region);GO:0006508(proteolysis);GO:0007507(heart development);GO:0008233(peptidase activity);GO:0008237(metallopeptidase activity);GO:0016787(hydrolase activity);GO:0030198(extracellular matrix organization);GO:0031012(extracellular matrix);GO:0035904(aorta deve…	NA	NA	hsa-miR-20a-3p	m8	-0.126	51	154	-11.33
circRNA2845	chr5	65242104	65473952	-	14	circRNA	ENST00000381055	ADAMTS6	mRNA	chr5:65226219-65242103|chr5:65473952-65481342	ADAM metallopeptidase with thrombospondin type 1 motif 6 [Source:HGNC Symbol;Acc:HGNC:222]	GO:0001822(kidney development);GO:0003279(cardiac septum development);GO:0004222(metalloendopeptidase activity);GO:0005576(extracellular region);GO:0006508(proteolysis);GO:0007507(heart development);GO:0008233(peptidase activity);GO:0008237(metallopeptidase activity);GO:0016787(hydrolase activity);GO:0030198(extracellular matrix organization);GO:0031012(extracellular matrix);GO:0035904(aorta deve…	NA	NA	hsa-miR-20a-3p	m8	-0.161	66	150	-12.91
circRNA2845	chr5	65242104	65473952	-	14	circRNA	ENST00000381055	ADAMTS6	mRNA	chr5:65226219-65242103|chr5:65473952-65481342	ADAM metallopeptidase with thrombospondin type 1 motif 6 [Source:HGNC Symbol;Acc:HGNC:222]	GO:0001822(kidney development);GO:0003279(cardiac septum development);GO:0004222(metalloendopeptidase activity);GO:0005576(extracellular region);GO:0006508(proteolysis);GO:0007507(heart development);GO:0008233(peptidase activity);GO:0008237(metallopeptidase activity);GO:0016787(hydrolase activity);GO:0030198(extracellular matrix organization);GO:0031012(extracellular matrix);GO:0035904(aorta deve…	NA	NA	hsa-miR-20a-5p	m8	-0.2205	88	163	-18.2
circRNA2842	chr5	65188016	65291470	-	12	circRNA	ENST00000381055	ADAMTS6	mRNA	chr5:65173008-65188015|chr5:65291470-65299984	ADAM metallopeptidase with thrombospondin type 1 motif 6 [Source:HGNC Symbol;Acc:HGNC:222]	GO:0001822(kidney development);GO:0003279(cardiac septum development);GO:0004222(metalloendopeptidase activity);GO:0005576(extracellular region);GO:0006508(proteolysis);GO:0007507(heart development);GO:0008233(peptidase activity);GO:0008237(metallopeptidase activity);GO:0016787(hydrolase activity);GO:0030198(extracellular matrix organization);GO:0031012(extracellular matrix);GO:0035904(aorta deve…	NA	NA	hsa-miR-21-3p	8mer	-0.283	93	143	-11.93
circRNA2845	chr5	65242104	65473952	-	14	circRNA	ENST00000381055	ADAMTS6	mRNA	chr5:65226219-65242103|chr5:65473952-65481342	ADAM metallopeptidase with thrombospondin type 1 motif 6 [Source:HGNC Symbol;Acc:HGNC:222]	GO:0001822(kidney development);GO:0003279(cardiac septum development);GO:0004222(metalloendopeptidase activity);GO:0005576(extracellular region);GO:0006508(proteolysis);GO:0007507(heart development);GO:0008233(peptidase activity);GO:0008237(metallopeptidase activity);GO:0016787(hydrolase activity);GO:0030198(extracellular matrix organization);GO:0031012(extracellular matrix);GO:0035904(aorta deve…	NA	NA	hsa-miR-21-3p	8mer	-0.28205	93	146	-11.93
circRNA7738	chr5	65242104	65273447	-	4	circRNA	ENST00000381055	ADAMTS6	mRNA	chr5:65226219-65242103|chr5:65273447-65291328	ADAM metallopeptidase with thrombospondin type 1 motif 6 [Source:HGNC Symbol;Acc:HGNC:222]	GO:0001822(kidney development);GO:0003279(cardiac septum development);GO:0004222(metalloendopeptidase activity);GO:0005576(extracellular region);GO:0006508(proteolysis);GO:0007507(heart development);GO:0008233(peptidase activity);GO:0008237(metallopeptidase activity);GO:0016787(hydrolase activity);GO:0030198(extracellular matrix organization);GO:0031012(extracellular matrix);GO:0035904(aorta deve…	NA	NA	hsa-miR-21-3p	8mer	-0.307	95	143	-11.93
circRNA2842	chr5	65188016	65291470	-	12	circRNA	ENST00000381055	ADAMTS6	mRNA	chr5:65173008-65188015|chr5:65291470-65299984	ADAM metallopeptidase with thrombospondin type 1 motif 6 [Source:HGNC Symbol;Acc:HGNC:222]	GO:0001822(kidney development);GO:0003279(cardiac septum development);GO:0004222(metalloendopeptidase activity);GO:0005576(extracellular region);GO:0006508(proteolysis);GO:0007507(heart development);GO:0008233(peptidase activity);GO:0008237(metallopeptidase activity);GO:0016787(hydrolase activity);GO:0030198(extracellular matrix organization);GO:0031012(extracellular matrix);GO:0035904(aorta deve…	NA	NA	hsa-miR-216a-3p	8mer	-0.30335	96	165	-25.5
circRNA2845	chr5	65242104	65473952	-	14	circRNA	ENST00000381055	ADAMTS6	mRNA	chr5:65226219-65242103|chr5:65473952-65481342	ADAM metallopeptidase with thrombospondin type 1 motif 6 [Source:HGNC Symbol;Acc:HGNC:222]	GO:0001822(kidney development);GO:0003279(cardiac septum development);GO:0004222(metalloendopeptidase activity);GO:0005576(extracellular region);GO:0006508(proteolysis);GO:0007507(heart development);GO:0008233(peptidase activity);GO:0008237(metallopeptidase activity);GO:0016787(hydrolase activity);GO:0030198(extracellular matrix organization);GO:0031012(extracellular matrix);GO:0035904(aorta deve…	NA	NA	hsa-miR-216a-3p	1a	-0.1793	82	165	-25.5
circRNA7738	chr5	65242104	65273447	-	4	circRNA	ENST00000381055	ADAMTS6	mRNA	chr5:65226219-65242103|chr5:65273447-65291328	ADAM metallopeptidase with thrombospondin type 1 motif 6 [Source:HGNC Symbol;Acc:HGNC:222]	GO:0001822(kidney development);GO:0003279(cardiac septum development);GO:0004222(metalloendopeptidase activity);GO:0005576(extracellular region);GO:0006508(proteolysis);GO:0007507(heart development);GO:0008233(peptidase activity);GO:0008237(metallopeptidase activity);GO:0016787(hydrolase activity);GO:0030198(extracellular matrix organization);GO:0031012(extracellular matrix);GO:0035904(aorta deve…	NA	NA	hsa-miR-216a-3p	m8	-0.189	84	165	-25.5
circRNA2845	chr5	65242104	65473952	-	14	circRNA	ENST00000381055	ADAMTS6	mRNA	chr5:65226219-65242103|chr5:65473952-65481342	ADAM metallopeptidase with thrombospondin type 1 motif 6 [Source:HGNC Symbol;Acc:HGNC:222]	GO:0001822(kidney development);GO:0003279(cardiac septum development);GO:0004222(metalloendopeptidase activity);GO:0005576(extracellular region);GO:0006508(proteolysis);GO:0007507(heart development);GO:0008233(peptidase activity);GO:0008237(metallopeptidase activity);GO:0016787(hydrolase activity);GO:0030198(extracellular matrix organization);GO:0031012(extracellular matrix);GO:0035904(aorta deve…	NA	NA	hsa-miR-216a-5p	m8	-0.192	80	154	-16.92
circRNA2845	chr5	65242104	65473952	-	14	circRNA	ENST00000381055	ADAMTS6	mRNA	chr5:65226219-65242103|chr5:65473952-65481342	ADAM metallopeptidase with thrombospondin type 1 motif 6 [Source:HGNC Symbol;Acc:HGNC:222]	GO:0001822(kidney development);GO:0003279(cardiac septum development);GO:0004222(metalloendopeptidase activity);GO:0005576(extracellular region);GO:0006508(proteolysis);GO:0007507(heart development);GO:0008233(peptidase activity);GO:0008237(metallopeptidase activity);GO:0016787(hydrolase activity);GO:0030198(extracellular matrix organization);GO:0031012(extracellular matrix);GO:0035904(aorta deve…	NA	NA	hsa-miR-217-5p	m8	-0.1785	74	142	-12.11
circRNA2845	chr5	65242104	65473952	-	14	circRNA	ENST00000381055	ADAMTS6	mRNA	chr5:65226219-65242103|chr5:65473952-65481342	ADAM metallopeptidase with thrombospondin type 1 motif 6 [Source:HGNC Symbol;Acc:HGNC:222]	GO:0001822(kidney development);GO:0003279(cardiac septum development);GO:0004222(metalloendopeptidase activity);GO:0005576(extracellular region);GO:0006508(proteolysis);GO:0007507(heart development);GO:0008233(peptidase activity);GO:0008237(metallopeptidase activity);GO:0016787(hydrolase activity);GO:0030198(extracellular matrix organization);GO:0031012(extracellular matrix);GO:0035904(aorta deve…	NA	NA	hsa-miR-218-2-3p	m8	-0.2175	86	154	-18.99
circRNA2845	chr5	65242104	65473952	-	14	circRNA	ENST00000381055	ADAMTS6	mRNA	chr5:65226219-65242103|chr5:65473952-65481342	ADAM metallopeptidase with thrombospondin type 1 motif 6 [Source:HGNC Symbol;Acc:HGNC:222]	GO:0001822(kidney development);GO:0003279(cardiac septum development);GO:0004222(metalloendopeptidase activity);GO:0005576(extracellular region);GO:0006508(proteolysis);GO:0007507(heart development);GO:0008233(peptidase activity);GO:0008237(metallopeptidase activity);GO:0016787(hydrolase activity);GO:0030198(extracellular matrix organization);GO:0031012(extracellular matrix);GO:0035904(aorta deve…	NA	NA	hsa-miR-22-3p	m8	-0.2245	86	145	-18.32
circRNA2842	chr5	65188016	65291470	-	12	circRNA	ENST00000381055	ADAMTS6	mRNA	chr5:65173008-65188015|chr5:65291470-65299984	ADAM metallopeptidase with thrombospondin type 1 motif 6 [Source:HGNC Symbol;Acc:HGNC:222]	GO:0001822(kidney development);GO:0003279(cardiac septum development);GO:0004222(metalloendopeptidase activity);GO:0005576(extracellular region);GO:0006508(proteolysis);GO:0007507(heart development);GO:0008233(peptidase activity);GO:0008237(metallopeptidase activity);GO:0016787(hydrolase activity);GO:0030198(extracellular matrix organization);GO:0031012(extracellular matrix);GO:0035904(aorta deve…	NA	NA	hsa-miR-24-3p	m8	-0.2265	94	161	-23.87
circRNA2842	chr5	65188016	65291470	-	12	circRNA	ENST00000381055	ADAMTS6	mRNA	chr5:65173008-65188015|chr5:65291470-65299984	ADAM metallopeptidase with thrombospondin type 1 motif 6 [Source:HGNC Symbol;Acc:HGNC:222]	GO:0001822(kidney development);GO:0003279(cardiac septum development);GO:0004222(metalloendopeptidase activity);GO:0005576(extracellular region);GO:0006508(proteolysis);GO:0007507(heart development);GO:0008233(peptidase activity);GO:0008237(metallopeptidase activity);GO:0016787(hydrolase activity);GO:0030198(extracellular matrix organization);GO:0031012(extracellular matrix);GO:0035904(aorta deve…	NA	NA	hsa-miR-27a-3p	m8	-0.254	89	159	-14.91
circRNA2845	chr5	65242104	65473952	-	14	circRNA	ENST00000381055	ADAMTS6	mRNA	chr5:65226219-65242103|chr5:65473952-65481342	ADAM metallopeptidase with thrombospondin type 1 motif 6 [Source:HGNC Symbol;Acc:HGNC:222]	GO:0001822(kidney development);GO:0003279(cardiac septum development);GO:0004222(metalloendopeptidase activity);GO:0005576(extracellular region);GO:0006508(proteolysis);GO:0007507(heart development);GO:0008233(peptidase activity);GO:0008237(metallopeptidase activity);GO:0016787(hydrolase activity);GO:0030198(extracellular matrix organization);GO:0031012(extracellular matrix);GO:0035904(aorta deve…	NA	NA	hsa-miR-27a-3p	8mer	-0.42125	97	159	-16.27
circRNA7738	chr5	65242104	65273447	-	4	circRNA	ENST00000381055	ADAMTS6	mRNA	chr5:65226219-65242103|chr5:65273447-65291328	ADAM metallopeptidase with thrombospondin type 1 motif 6 [Source:HGNC Symbol;Acc:HGNC:222]	GO:0001822(kidney development);GO:0003279(cardiac septum development);GO:0004222(metalloendopeptidase activity);GO:0005576(extracellular region);GO:0006508(proteolysis);GO:0007507(heart development);GO:0008233(peptidase activity);GO:0008237(metallopeptidase activity);GO:0016787(hydrolase activity);GO:0030198(extracellular matrix organization);GO:0031012(extracellular matrix);GO:0035904(aorta deve…	NA	NA	hsa-miR-27a-3p	m8	-0.113	52	159	-14.59
circRNA2845	chr5	65242104	65473952	-	14	circRNA	ENST00000381055	ADAMTS6	mRNA	chr5:65226219-65242103|chr5:65473952-65481342	ADAM metallopeptidase with thrombospondin type 1 motif 6 [Source:HGNC Symbol;Acc:HGNC:222]	GO:0001822(kidney development);GO:0003279(cardiac septum development);GO:0004222(metalloendopeptidase activity);GO:0005576(extracellular region);GO:0006508(proteolysis);GO:0007507(heart development);GO:0008233(peptidase activity);GO:0008237(metallopeptidase activity);GO:0016787(hydrolase activity);GO:0030198(extracellular matrix organization);GO:0031012(extracellular matrix);GO:0035904(aorta deve…	NA	NA	hsa-miR-27a-5p	m8	-0.194	89	153	-19.25
circRNA2842	chr5	65188016	65291470	-	12	circRNA	ENST00000381055	ADAMTS6	mRNA	chr5:65173008-65188015|chr5:65291470-65299984	ADAM metallopeptidase with thrombospondin type 1 motif 6 [Source:HGNC Symbol;Acc:HGNC:222]	GO:0001822(kidney development);GO:0003279(cardiac septum development);GO:0004222(metalloendopeptidase activity);GO:0005576(extracellular region);GO:0006508(proteolysis);GO:0007507(heart development);GO:0008233(peptidase activity);GO:0008237(metallopeptidase activity);GO:0016787(hydrolase activity);GO:0030198(extracellular matrix organization);GO:0031012(extracellular matrix);GO:0035904(aorta deve…	NA	NA	hsa-miR-27b-3p	m8	-0.285	91	159	-19.62
circRNA2845	chr5	65242104	65473952	-	14	circRNA	ENST00000381055	ADAMTS6	mRNA	chr5:65226219-65242103|chr5:65473952-65481342	ADAM metallopeptidase with thrombospondin type 1 motif 6 [Source:HGNC Symbol;Acc:HGNC:222]	GO:0001822(kidney development);GO:0003279(cardiac septum development);GO:0004222(metalloendopeptidase activity);GO:0005576(extracellular region);GO:0006508(proteolysis);GO:0007507(heart development);GO:0008233(peptidase activity);GO:0008237(metallopeptidase activity);GO:0016787(hydrolase activity);GO:0030198(extracellular matrix organization);GO:0031012(extracellular matrix);GO:0035904(aorta deve…	NA	NA	hsa-miR-27b-3p	8mer	-0.42125	97	159	-18.16
circRNA7738	chr5	65242104	65273447	-	4	circRNA	ENST00000381055	ADAMTS6	mRNA	chr5:65226219-65242103|chr5:65273447-65291328	ADAM metallopeptidase with thrombospondin type 1 motif 6 [Source:HGNC Symbol;Acc:HGNC:222]	GO:0001822(kidney development);GO:0003279(cardiac septum development);GO:0004222(metalloendopeptidase activity);GO:0005576(extracellular region);GO:0006508(proteolysis);GO:0007507(heart development);GO:0008233(peptidase activity);GO:0008237(metallopeptidase activity);GO:0016787(hydrolase activity);GO:0030198(extracellular matrix organization);GO:0031012(extracellular matrix);GO:0035904(aorta deve…	NA	NA	hsa-miR-27b-3p	m8	-0.113	52	159	-15.29
circRNA2842	chr5	65188016	65291470	-	12	circRNA	ENST00000381055	ADAMTS6	mRNA	chr5:65173008-65188015|chr5:65291470-65299984	ADAM metallopeptidase with thrombospondin type 1 motif 6 [Source:HGNC Symbol;Acc:HGNC:222]	GO:0001822(kidney development);GO:0003279(cardiac septum development);GO:0004222(metalloendopeptidase activity);GO:0005576(extracellular region);GO:0006508(proteolysis);GO:0007507(heart development);GO:0008233(peptidase activity);GO:0008237(metallopeptidase activity);GO:0016787(hydrolase activity);GO:0030198(extracellular matrix organization);GO:0031012(extracellular matrix);GO:0035904(aorta deve…	NA	NA	hsa-miR-29b-1-5p	1a	-0.1604	65	147	-20.16
circRNA2842	chr5	65188016	65291470	-	12	circRNA	ENST00000381055	ADAMTS6	mRNA	chr5:65173008-65188015|chr5:65291470-65299984	ADAM metallopeptidase with thrombospondin type 1 motif 6 [Source:HGNC Symbol;Acc:HGNC:222]	GO:0001822(kidney development);GO:0003279(cardiac septum development);GO:0004222(metalloendopeptidase activity);GO:0005576(extracellular region);GO:0006508(proteolysis);GO:0007507(heart development);GO:0008233(peptidase activity);GO:0008237(metallopeptidase activity);GO:0016787(hydrolase activity);GO:0030198(extracellular matrix organization);GO:0031012(extracellular matrix);GO:0035904(aorta deve…	NA	NA	hsa-miR-30b-3p	8mer	-0.3202	98	150	-18.68
circRNA2845	chr5	65242104	65473952	-	14	circRNA	ENST00000381055	ADAMTS6	mRNA	chr5:65226219-65242103|chr5:65473952-65481342	ADAM metallopeptidase with thrombospondin type 1 motif 6 [Source:HGNC Symbol;Acc:HGNC:222]	GO:0001822(kidney development);GO:0003279(cardiac septum development);GO:0004222(metalloendopeptidase activity);GO:0005576(extracellular region);GO:0006508(proteolysis);GO:0007507(heart development);GO:0008233(peptidase activity);GO:0008237(metallopeptidase activity);GO:0016787(hydrolase activity);GO:0030198(extracellular matrix organization);GO:0031012(extracellular matrix);GO:0035904(aorta deve…	NA	NA	hsa-miR-30b-3p	8mer	-0.2352	94	150	-18.68
circRNA2845	chr5	65242104	65473952	-	14	circRNA	ENST00000381055	ADAMTS6	mRNA	chr5:65226219-65242103|chr5:65473952-65481342	ADAM metallopeptidase with thrombospondin type 1 motif 6 [Source:HGNC Symbol;Acc:HGNC:222]	GO:0001822(kidney development);GO:0003279(cardiac septum development);GO:0004222(metalloendopeptidase activity);GO:0005576(extracellular region);GO:0006508(proteolysis);GO:0007507(heart development);GO:0008233(peptidase activity);GO:0008237(metallopeptidase activity);GO:0016787(hydrolase activity);GO:0030198(extracellular matrix organization);GO:0031012(extracellular matrix);GO:0035904(aorta deve…	NA	NA	hsa-miR-30c-2-3p	1a	-0.0402	56	152	-14.2
circRNA2845	chr5	65242104	65473952	-	14	circRNA	ENST00000381055	ADAMTS6	mRNA	chr5:65226219-65242103|chr5:65473952-65481342	ADAM metallopeptidase with thrombospondin type 1 motif 6 [Source:HGNC Symbol;Acc:HGNC:222]	GO:0001822(kidney development);GO:0003279(cardiac septum development);GO:0004222(metalloendopeptidase activity);GO:0005576(extracellular region);GO:0006508(proteolysis);GO:0007507(heart development);GO:0008233(peptidase activity);GO:0008237(metallopeptidase activity);GO:0016787(hydrolase activity);GO:0030198(extracellular matrix organization);GO:0031012(extracellular matrix);GO:0035904(aorta deve…	NA	NA	hsa-miR-33a-3p	m8	-0.1635	62	156	-23.31
circRNA2842	chr5	65188016	65291470	-	12	circRNA	ENST00000381055	ADAMTS6	mRNA	chr5:65173008-65188015|chr5:65291470-65299984	ADAM metallopeptidase with thrombospondin type 1 motif 6 [Source:HGNC Symbol;Acc:HGNC:222]	GO:0001822(kidney development);GO:0003279(cardiac septum development);GO:0004222(metalloendopeptidase activity);GO:0005576(extracellular region);GO:0006508(proteolysis);GO:0007507(heart development);GO:0008233(peptidase activity);GO:0008237(metallopeptidase activity);GO:0016787(hydrolase activity);GO:0030198(extracellular matrix organization);GO:0031012(extracellular matrix);GO:0035904(aorta deve…	NA	NA	hsa-miR-34a-5p	m8	-0.1325	64	145	-14.02
circRNA2842	chr5	65188016	65291470	-	12	circRNA	ENST00000381055	ADAMTS6	mRNA	chr5:65173008-65188015|chr5:65291470-65299984	ADAM metallopeptidase with thrombospondin type 1 motif 6 [Source:HGNC Symbol;Acc:HGNC:222]	GO:0001822(kidney development);GO:0003279(cardiac septum development);GO:0004222(metalloendopeptidase activity);GO:0005576(extracellular region);GO:0006508(proteolysis);GO:0007507(heart development);GO:0008233(peptidase activity);GO:0008237(metallopeptidase activity);GO:0016787(hydrolase activity);GO:0030198(extracellular matrix organization);GO:0031012(extracellular matrix);GO:0035904(aorta deve…	NA	NA	hsa-miR-92a-3p	m8	-0.13	71	161	-24.08
circRNA2845	chr5	65242104	65473952	-	14	circRNA	ENST00000381055	ADAMTS6	mRNA	chr5:65226219-65242103|chr5:65473952-65481342	ADAM metallopeptidase with thrombospondin type 1 motif 6 [Source:HGNC Symbol;Acc:HGNC:222]	GO:0001822(kidney development);GO:0003279(cardiac septum development);GO:0004222(metalloendopeptidase activity);GO:0005576(extracellular region);GO:0006508(proteolysis);GO:0007507(heart development);GO:0008233(peptidase activity);GO:0008237(metallopeptidase activity);GO:0016787(hydrolase activity);GO:0030198(extracellular matrix organization);GO:0031012(extracellular matrix);GO:0035904(aorta deve…	NA	NA	hsa-miR-93-5p	m8	-0.1895	85	154	-17.13
circRNA2845	chr5	65242104	65473952	-	14	circRNA	ENST00000381055	ADAMTS6	mRNA	chr5:65226219-65242103|chr5:65473952-65481342	ADAM metallopeptidase with thrombospondin type 1 motif 6 [Source:HGNC Symbol;Acc:HGNC:222]	GO:0001822(kidney development);GO:0003279(cardiac septum development);GO:0004222(metalloendopeptidase activity);GO:0005576(extracellular region);GO:0006508(proteolysis);GO:0007507(heart development);GO:0008233(peptidase activity);GO:0008237(metallopeptidase activity);GO:0016787(hydrolase activity);GO:0030198(extracellular matrix organization);GO:0031012(extracellular matrix);GO:0035904(aorta deve…	NA	NA	hsa-miR-96-3p	m8	-0.215	83	152	-18.73
circRNA2842	chr5	65188016	65291470	-	12	circRNA	ENST00000381055	ADAMTS6	mRNA	chr5:65173008-65188015|chr5:65291470-65299984	ADAM metallopeptidase with thrombospondin type 1 motif 6 [Source:HGNC Symbol;Acc:HGNC:222]	GO:0001822(kidney development);GO:0003279(cardiac septum development);GO:0004222(metalloendopeptidase activity);GO:0005576(extracellular region);GO:0006508(proteolysis);GO:0007507(heart development);GO:0008233(peptidase activity);GO:0008237(metallopeptidase activity);GO:0016787(hydrolase activity);GO:0030198(extracellular matrix organization);GO:0031012(extracellular matrix);GO:0035904(aorta deve…	NA	NA	hsa-miR-98-5p	8mer	-0.2581	89	143	-13.74
hsa_circ_0104765	chr15	83923904	83943082	+	3	circRNA	ENST00000567476	ADAMTSL3	mRNA	chr15:83913378-83923903|chr15:83943082-83970483	ADAMTS like 3 [Source:HGNC Symbol;Acc:HGNC:14633]	GO:0004222(metalloendopeptidase activity);GO:0005515(protein binding);GO:0005576(extracellular region);GO:0006508(proteolysis);GO:0008233(peptidase activity);GO:0030198(extracellular matrix organization);GO:0031012(extracellular matrix);GO:0043231(intracellular membrane-bounded organelle)	NA	NA	hsa-miR-212-5p	8mer	-0.3832	96	149	-15.09
hsa_circ_0104765	chr15	83923904	83943082	+	3	circRNA	ENST00000567476	ADAMTSL3	mRNA	chr15:83913378-83923903|chr15:83943082-83970483	ADAMTS like 3 [Source:HGNC Symbol;Acc:HGNC:14633]	GO:0004222(metalloendopeptidase activity);GO:0005515(protein binding);GO:0005576(extracellular region);GO:0006508(proteolysis);GO:0008233(peptidase activity);GO:0030198(extracellular matrix organization);GO:0031012(extracellular matrix);GO:0043231(intracellular membrane-bounded organelle)	NA	NA	hsa-miR-215-3p	m8	-0.161	72	149	-19.7
hsa_circ_0104765	chr15	83923904	83943082	+	3	circRNA	ENST00000567476	ADAMTSL3	mRNA	chr15:83913378-83923903|chr15:83943082-83970483	ADAMTS like 3 [Source:HGNC Symbol;Acc:HGNC:14633]	GO:0004222(metalloendopeptidase activity);GO:0005515(protein binding);GO:0005576(extracellular region);GO:0006508(proteolysis);GO:0008233(peptidase activity);GO:0030198(extracellular matrix organization);GO:0031012(extracellular matrix);GO:0043231(intracellular membrane-bounded organelle)	NA	NA	hsa-miR-221-5p	8mer	-0.2953	94	154	-19.27
hsa_circ_0104765	chr15	83923904	83943082	+	3	circRNA	ENST00000567476	ADAMTSL3	mRNA	chr15:83913378-83923903|chr15:83943082-83970483	ADAMTS like 3 [Source:HGNC Symbol;Acc:HGNC:14633]	GO:0004222(metalloendopeptidase activity);GO:0005515(protein binding);GO:0005576(extracellular region);GO:0006508(proteolysis);GO:0008233(peptidase activity);GO:0030198(extracellular matrix organization);GO:0031012(extracellular matrix);GO:0043231(intracellular membrane-bounded organelle)	NA	NA	hsa-miR-22-3p	m8	-0.251	90	150	-22.67
hsa_circ_0104765	chr15	83923904	83943082	+	3	circRNA	ENST00000567476	ADAMTSL3	mRNA	chr15:83913378-83923903|chr15:83943082-83970483	ADAMTS like 3 [Source:HGNC Symbol;Acc:HGNC:14633]	GO:0004222(metalloendopeptidase activity);GO:0005515(protein binding);GO:0005576(extracellular region);GO:0006508(proteolysis);GO:0008233(peptidase activity);GO:0030198(extracellular matrix organization);GO:0031012(extracellular matrix);GO:0043231(intracellular membrane-bounded organelle)	NA	NA	hsa-miR-26b-3p	8mer	-0.26515	87	147	-13.63
hsa_circ_0104765	chr15	83923904	83943082	+	3	circRNA	ENST00000567476	ADAMTSL3	mRNA	chr15:83913378-83923903|chr15:83943082-83970483	ADAMTS like 3 [Source:HGNC Symbol;Acc:HGNC:14633]	GO:0004222(metalloendopeptidase activity);GO:0005515(protein binding);GO:0005576(extracellular region);GO:0006508(proteolysis);GO:0008233(peptidase activity);GO:0030198(extracellular matrix organization);GO:0031012(extracellular matrix);GO:0043231(intracellular membrane-bounded organelle)	NA	NA	hsa-miR-96-5p	m8	-0.235	89	152	-16.26
hsa_circ_0137263	chr8	89647740	89725641	-	1	ciRNA	ENST00000661105	AF117829	mRNA	chr8:89647739-89725641	novel transcript	NA	NA	NA	hsa-let-7a-2-3p	m8	-0.1715	73	149	-25.56
hsa_circ_0137263	chr8	89647740	89725641	-	1	ciRNA	ENST00000661105	AF117829	mRNA	chr8:89647739-89725641	novel transcript	NA	NA	NA	hsa-let-7a-3p	8mer	-0.2443	89	158	-15.72
hsa_circ_0137263	chr8	89647740	89725641	-	1	ciRNA	ENST00000661105	AF117829	mRNA	chr8:89647739-89725641	novel transcript	NA	NA	NA	hsa-let-7a-5p	1a	-0.1123	54	155	-17.6
hsa_circ_0137263	chr8	89647740	89725641	-	1	ciRNA	ENST00000661105	AF117829	mRNA	chr8:89647739-89725641	novel transcript	NA	NA	NA	hsa-let-7b-3p	8mer	-0.2402	89	155	-19.9
hsa_circ_0137263	chr8	89647740	89725641	-	1	ciRNA	ENST00000661105	AF117829	mRNA	chr8:89647739-89725641	novel transcript	NA	NA	NA	hsa-let-7b-5p	1a	-0.10175	50	159	-26.34
hsa_circ_0137263	chr8	89647740	89725641	-	1	ciRNA	ENST00000661105	AF117829	mRNA	chr8:89647739-89725641	novel transcript	NA	NA	NA	hsa-let-7c-3p	m8	-0.204	80	152	-20.84
hsa_circ_0137263	chr8	89647740	89725641	-	1	ciRNA	ENST00000661105	AF117829	mRNA	chr8:89647739-89725641	novel transcript	NA	NA	NA	hsa-let-7c-5p	1a	-0.1123	54	151	-20.64
hsa_circ_0137263	chr8	89647740	89725641	-	1	ciRNA	ENST00000661105	AF117829	mRNA	chr8:89647739-89725641	novel transcript	NA	NA	NA	hsa-let-7d-5p	m8	-0.137	63	155	-22.26
hsa_circ_0137263	chr8	89647740	89725641	-	1	ciRNA	ENST00000661105	AF117829	mRNA	chr8:89647739-89725641	novel transcript	NA	NA	NA	hsa-let-7e-5p	1a	-0.1123	54	163	-25.34
hsa_circ_0137263	chr8	89647740	89725641	-	1	ciRNA	ENST00000661105	AF117829	mRNA	chr8:89647739-89725641	novel transcript	NA	NA	NA	hsa-let-7f-1-3p	8mer	-0.24225	88	152	-15.33
hsa_circ_0137263	chr8	89647740	89725641	-	1	ciRNA	ENST00000661105	AF117829	mRNA	chr8:89647739-89725641	novel transcript	NA	NA	NA	hsa-let-7f-2-3p	m8	-0.13	59	156	-21.56
hsa_circ_0137263	chr8	89647740	89725641	-	1	ciRNA	ENST00000661105	AF117829	mRNA	chr8:89647739-89725641	novel transcript	NA	NA	NA	hsa-let-7f-5p	1a	-0.1123	54	159	-19.73
hsa_circ_0137263	chr8	89647740	89725641	-	1	ciRNA	ENST00000661105	AF117829	mRNA	chr8:89647739-89725641	novel transcript	NA	NA	NA	hsa-let-7g-3p	m8	-0.1405	63	154	-22.39
hsa_circ_0137263	chr8	89647740	89725641	-	1	ciRNA	ENST00000661105	AF117829	mRNA	chr8:89647739-89725641	novel transcript	NA	NA	NA	hsa-let-7g-5p	1a	-0.1123	54	166	-23.15
hsa_circ_0137263	chr8	89647740	89725641	-	1	ciRNA	ENST00000661105	AF117829	mRNA	chr8:89647739-89725641	novel transcript	NA	NA	NA	hsa-let-7i-5p	1a	-0.1104	54	156	-23.91
hsa_circ_0137263	chr8	89647740	89725641	-	1	ciRNA	ENST00000661105	AF117829	mRNA	chr8:89647739-89725641	novel transcript	NA	NA	NA	hsa-miR-100-3p	8mer	-0.2282	87	157	-25.3
hsa_circ_0137263	chr8	89647740	89725641	-	1	ciRNA	ENST00000661105	AF117829	mRNA	chr8:89647739-89725641	novel transcript	NA	NA	NA	hsa-miR-101-3p	1a	-0.14775	68	157	-21.36
hsa_circ_0137263	chr8	89647740	89725641	-	1	ciRNA	ENST00000661105	AF117829	mRNA	chr8:89647739-89725641	novel transcript	NA	NA	NA	hsa-miR-101-5p	1a	-0.1562	69	152	-19.28
hsa_circ_0137263	chr8	89647740	89725641	-	1	ciRNA	ENST00000661105	AF117829	mRNA	chr8:89647739-89725641	novel transcript	NA	NA	NA	hsa-miR-103a-1-5p	m8	-0.155	62	159	-26.21
hsa_circ_0137263	chr8	89647740	89725641	-	1	ciRNA	ENST00000661105	AF117829	mRNA	chr8:89647739-89725641	novel transcript	NA	NA	NA	hsa-miR-103a-2-5p	m8	-0.155	62	159	-26.1
hsa_circ_0137263	chr8	89647740	89725641	-	1	ciRNA	ENST00000661105	AF117829	mRNA	chr8:89647739-89725641	novel transcript	NA	NA	NA	hsa-miR-103a-3p	m8	-0.107	52	168	-21.72
hsa_circ_0137263	chr8	89647740	89725641	-	1	ciRNA	ENST00000661105	AF117829	mRNA	chr8:89647739-89725641	novel transcript	NA	NA	NA	hsa-miR-105-5p	m8	-0.157	68	159	-20.84
hsa_circ_0137263	chr8	89647740	89725641	-	1	ciRNA	ENST00000661105	AF117829	mRNA	chr8:89647739-89725641	novel transcript	NA	NA	NA	hsa-miR-106a-3p	8mer	-0.1752	78	160	-15.67
hsa_circ_0137263	chr8	89647740	89725641	-	1	ciRNA	ENST00000661105	AF117829	mRNA	chr8:89647739-89725641	novel transcript	NA	NA	NA	hsa-miR-106a-5p	8mer	-0.2212	89	167	-20.04
hsa_circ_0137263	chr8	89647740	89725641	-	1	ciRNA	ENST00000661105	AF117829	mRNA	chr8:89647739-89725641	novel transcript	NA	NA	NA	hsa-miR-107	m8	-0.107	52	168	-22.71
hsa_circ_0137263	chr8	89647740	89725641	-	1	ciRNA	ENST00000661105	AF117829	mRNA	chr8:89647739-89725641	novel transcript	NA	NA	NA	hsa-miR-10a-3p	1a	-0.26395	97	153	-23.22
hsa_circ_0137263	chr8	89647740	89725641	-	1	ciRNA	ENST00000661105	AF117829	mRNA	chr8:89647739-89725641	novel transcript	NA	NA	NA	hsa-miR-10a-5p	1a	-0.07275	54	152	-24.81
hsa_circ_0137263	chr8	89647740	89725641	-	1	ciRNA	ENST00000661105	AF117829	mRNA	chr8:89647739-89725641	novel transcript	NA	NA	NA	hsa-miR-10b-3p	8mer	-0.1912	74	156	-20.12
hsa_circ_0137263	chr8	89647740	89725641	-	1	ciRNA	ENST00000661105	AF117829	mRNA	chr8:89647739-89725641	novel transcript	NA	NA	NA	hsa-miR-10b-5p	m8	-0.0825	60	153	-21.91
hsa_circ_0137263	chr8	89647740	89725641	-	1	ciRNA	ENST00000661105	AF117829	mRNA	chr8:89647739-89725641	novel transcript	NA	NA	NA	hsa-miR-122-3p	m8	-0.09	58	171	-22.09
hsa_circ_0137263	chr8	89647740	89725641	-	1	ciRNA	ENST00000661105	AF117829	mRNA	chr8:89647739-89725641	novel transcript	NA	NA	NA	hsa-miR-122-5p	8mer	-0.1172	77	158	-30.48
hsa_circ_0137263	chr8	89647740	89725641	-	1	ciRNA	ENST00000661105	AF117829	mRNA	chr8:89647739-89725641	novel transcript	NA	NA	NA	hsa-miR-124-3p	m8	-0.1665	74	165	-20.73
hsa_circ_0137263	chr8	89647740	89725641	-	1	ciRNA	ENST00000661105	AF117829	mRNA	chr8:89647739-89725641	novel transcript	NA	NA	NA	hsa-miR-124-5p	m8	-0.247	88	156	-19.52
hsa_circ_0137263	chr8	89647740	89725641	-	1	ciRNA	ENST00000661105	AF117829	mRNA	chr8:89647739-89725641	novel transcript	NA	NA	NA	hsa-miR-125b-5p	1a	-0.10875	58	178	-32.37
hsa_circ_0137263	chr8	89647740	89725641	-	1	ciRNA	ENST00000661105	AF117829	mRNA	chr8:89647739-89725641	novel transcript	NA	NA	NA	hsa-miR-128-1-5p	1a	-0.05465	57	140	-20.96
hsa_circ_0137263	chr8	89647740	89725641	-	1	ciRNA	ENST00000661105	AF117829	mRNA	chr8:89647739-89725641	novel transcript	NA	NA	NA	hsa-miR-128-3p	m8	-0.17	79	174	-28.59
hsa_circ_0137263	chr8	89647740	89725641	-	1	ciRNA	ENST00000661105	AF117829	mRNA	chr8:89647739-89725641	novel transcript	NA	NA	NA	hsa-miR-129-1-3p	8mer	-0.1992	84	159	-19.53
hsa_circ_0137263	chr8	89647740	89725641	-	1	ciRNA	ENST00000661105	AF117829	mRNA	chr8:89647739-89725641	novel transcript	NA	NA	NA	hsa-miR-129-5p	1a	-0.15975	78	160	-19.73
hsa_circ_0137263	chr8	89647740	89725641	-	1	ciRNA	ENST00000661105	AF117829	mRNA	chr8:89647739-89725641	novel transcript	NA	NA	NA	hsa-miR-130a-3p	m8	-0.109	53	163	-19.84
hsa_circ_0137263	chr8	89647740	89725641	-	1	ciRNA	ENST00000661105	AF117829	mRNA	chr8:89647739-89725641	novel transcript	NA	NA	NA	hsa-miR-130a-5p	m8	-0.1305	52	175	-23.17
hsa_circ_0137263	chr8	89647740	89725641	-	1	ciRNA	ENST00000661105	AF117829	mRNA	chr8:89647739-89725641	novel transcript	NA	NA	NA	hsa-miR-132-3p	8mer	-0.1752	77	159	-25.4
hsa_circ_0137263	chr8	89647740	89725641	-	1	ciRNA	ENST00000661105	AF117829	mRNA	chr8:89647739-89725641	novel transcript	NA	NA	NA	hsa-miR-133a-3p	1a	-0.1942	77	158	-22.71
hsa_circ_0137263	chr8	89647740	89725641	-	1	ciRNA	ENST00000661105	AF117829	mRNA	chr8:89647739-89725641	novel transcript	NA	NA	NA	hsa-miR-133a-5p	1a	-0.0993	53	168	-21.79
hsa_circ_0137263	chr8	89647740	89725641	-	1	ciRNA	ENST00000661105	AF117829	mRNA	chr8:89647739-89725641	novel transcript	NA	NA	NA	hsa-miR-135a-2-3p	8mer	-0.1783	77	156	-25.88
hsa_circ_0137263	chr8	89647740	89725641	-	1	ciRNA	ENST00000661105	AF117829	mRNA	chr8:89647739-89725641	novel transcript	NA	NA	NA	hsa-miR-135a-3p	m8	-0.1955	83	149	-22.48
hsa_circ_0137263	chr8	89647740	89725641	-	1	ciRNA	ENST00000661105	AF117829	mRNA	chr8:89647739-89725641	novel transcript	NA	NA	NA	hsa-miR-139-5p	8mer	-0.13215	66	151	-21.47
hsa_circ_0137263	chr8	89647740	89725641	-	1	ciRNA	ENST00000661105	AF117829	mRNA	chr8:89647739-89725641	novel transcript	NA	NA	NA	hsa-miR-1-3p	m8	-0.164	72	164	-18.68
hsa_circ_0137263	chr8	89647740	89725641	-	1	ciRNA	ENST00000661105	AF117829	mRNA	chr8:89647739-89725641	novel transcript	NA	NA	NA	hsa-miR-147a	1a	-0.10275	53	163	-20.69
hsa_circ_0137263	chr8	89647740	89725641	-	1	ciRNA	ENST00000661105	AF117829	mRNA	chr8:89647739-89725641	novel transcript	NA	NA	NA	hsa-miR-148a-3p	8mer	-0.2055	83	159	-22.13
hsa_circ_0137263	chr8	89647740	89725641	-	1	ciRNA	ENST00000661105	AF117829	mRNA	chr8:89647739-89725641	novel transcript	NA	NA	NA	hsa-miR-148a-5p	8mer	-0.18825	71	158	-22.06
hsa_circ_0137263	chr8	89647740	89725641	-	1	ciRNA	ENST00000661105	AF117829	mRNA	chr8:89647739-89725641	novel transcript	NA	NA	NA	hsa-miR-15a-3p	m8	-0.194	85	153	-23.05
hsa_circ_0137263	chr8	89647740	89725641	-	1	ciRNA	ENST00000661105	AF117829	mRNA	chr8:89647739-89725641	novel transcript	NA	NA	NA	hsa-miR-15a-5p	m8	-0.2025	79	167	-27.14
hsa_circ_0137263	chr8	89647740	89725641	-	1	ciRNA	ENST00000661105	AF117829	mRNA	chr8:89647739-89725641	novel transcript	NA	NA	NA	hsa-miR-15b-3p	1a	-0.1472	63	167	-18.4
hsa_circ_0137263	chr8	89647740	89725641	-	1	ciRNA	ENST00000661105	AF117829	mRNA	chr8:89647739-89725641	novel transcript	NA	NA	NA	hsa-miR-15b-5p	m8	-0.187	76	179	-28.01
hsa_circ_0137263	chr8	89647740	89725641	-	1	ciRNA	ENST00000661105	AF117829	mRNA	chr8:89647739-89725641	novel transcript	NA	NA	NA	hsa-miR-16-1-3p	m8	-0.1355	55	164	-29.03
hsa_circ_0137263	chr8	89647740	89725641	-	1	ciRNA	ENST00000661105	AF117829	mRNA	chr8:89647739-89725641	novel transcript	NA	NA	NA	hsa-miR-16-2-3p	8mer	-0.2372	86	166	-21.56
hsa_circ_0137263	chr8	89647740	89725641	-	1	ciRNA	ENST00000661105	AF117829	mRNA	chr8:89647739-89725641	novel transcript	NA	NA	NA	hsa-miR-16-5p	m8	-0.138	59	163	-23.9
hsa_circ_0137263	chr8	89647740	89725641	-	1	ciRNA	ENST00000661105	AF117829	mRNA	chr8:89647739-89725641	novel transcript	NA	NA	NA	hsa-miR-17-3p	m8	-0.159	75	156	-22.5
hsa_circ_0137263	chr8	89647740	89725641	-	1	ciRNA	ENST00000661105	AF117829	mRNA	chr8:89647739-89725641	novel transcript	NA	NA	NA	hsa-miR-17-5p	8mer	-0.2212	89	167	-21.35
hsa_circ_0137263	chr8	89647740	89725641	-	1	ciRNA	ENST00000661105	AF117829	mRNA	chr8:89647739-89725641	novel transcript	NA	NA	NA	hsa-miR-181a-2-3p	m8	-0.142	65	156	-28.45
hsa_circ_0137263	chr8	89647740	89725641	-	1	ciRNA	ENST00000661105	AF117829	mRNA	chr8:89647739-89725641	novel transcript	NA	NA	NA	hsa-miR-181a-3p	8mer	-0.1863	78	160	-18.35
hsa_circ_0137263	chr8	89647740	89725641	-	1	ciRNA	ENST00000661105	AF117829	mRNA	chr8:89647739-89725641	novel transcript	NA	NA	NA	hsa-miR-181a-5p	m8	-0.121	52	164	-18.5
hsa_circ_0137263	chr8	89647740	89725641	-	1	ciRNA	ENST00000661105	AF117829	mRNA	chr8:89647739-89725641	novel transcript	NA	NA	NA	hsa-miR-181b-3p	m8	-0.1125	51	155	-17.46
hsa_circ_0137263	chr8	89647740	89725641	-	1	ciRNA	ENST00000661105	AF117829	mRNA	chr8:89647739-89725641	novel transcript	NA	NA	NA	hsa-miR-181b-5p	m8	-0.121	52	161	-23.55
hsa_circ_0137263	chr8	89647740	89725641	-	1	ciRNA	ENST00000661105	AF117829	mRNA	chr8:89647739-89725641	novel transcript	NA	NA	NA	hsa-miR-181c-3p	m8	-0.089	57	150	-20.15
hsa_circ_0137263	chr8	89647740	89725641	-	1	ciRNA	ENST00000661105	AF117829	mRNA	chr8:89647739-89725641	novel transcript	NA	NA	NA	hsa-miR-181c-5p	1a	-0.12975	57	160	-18.89
hsa_circ_0137263	chr8	89647740	89725641	-	1	ciRNA	ENST00000661105	AF117829	mRNA	chr8:89647739-89725641	novel transcript	NA	NA	NA	hsa-miR-182-3p	m8	-0.111	58	156	-20.68
hsa_circ_0137263	chr8	89647740	89725641	-	1	ciRNA	ENST00000661105	AF117829	mRNA	chr8:89647739-89725641	novel transcript	NA	NA	NA	hsa-miR-182-5p	8mer	-0.2542	86	184	-34.35
hsa_circ_0137263	chr8	89647740	89725641	-	1	ciRNA	ENST00000661105	AF117829	mRNA	chr8:89647739-89725641	novel transcript	NA	NA	NA	hsa-miR-183-3p	m8	-0.1105	51	156	-20.85
hsa_circ_0137263	chr8	89647740	89725641	-	1	ciRNA	ENST00000661105	AF117829	mRNA	chr8:89647739-89725641	novel transcript	NA	NA	NA	hsa-miR-183-5p	m8	-0.11	53	160	-17.46
hsa_circ_0137263	chr8	89647740	89725641	-	1	ciRNA	ENST00000661105	AF117829	mRNA	chr8:89647739-89725641	novel transcript	NA	NA	NA	hsa-miR-187-3p	8mer	-0.1112	53	149	-21.91
hsa_circ_0137263	chr8	89647740	89725641	-	1	ciRNA	ENST00000661105	AF117829	mRNA	chr8:89647739-89725641	novel transcript	NA	NA	NA	hsa-miR-187-5p	8mer	-0.13225	62	159	-22.74
hsa_circ_0137263	chr8	89647740	89725641	-	1	ciRNA	ENST00000661105	AF117829	mRNA	chr8:89647739-89725641	novel transcript	NA	NA	NA	hsa-miR-18a-3p	1a	-0.09665	62	169	-33.36
hsa_circ_0137263	chr8	89647740	89725641	-	1	ciRNA	ENST00000661105	AF117829	mRNA	chr8:89647739-89725641	novel transcript	NA	NA	NA	hsa-miR-18a-5p	m8	-0.115	56	164	-28.74
hsa_circ_0137263	chr8	89647740	89725641	-	1	ciRNA	ENST00000661105	AF117829	mRNA	chr8:89647739-89725641	novel transcript	NA	NA	NA	hsa-miR-192-3p	m8	-0.2005	80	156	-22.64
hsa_circ_0137263	chr8	89647740	89725641	-	1	ciRNA	ENST00000661105	AF117829	mRNA	chr8:89647739-89725641	novel transcript	NA	NA	NA	hsa-miR-192-5p	8mer	-0.13325	72	148	-21.2
hsa_circ_0137263	chr8	89647740	89725641	-	1	ciRNA	ENST00000661105	AF117829	mRNA	chr8:89647739-89725641	novel transcript	NA	NA	NA	hsa-miR-196a-1-3p	m8	-0.2075	81	157	-15.98
hsa_circ_0137263	chr8	89647740	89725641	-	1	ciRNA	ENST00000661105	AF117829	mRNA	chr8:89647739-89725641	novel transcript	NA	NA	NA	hsa-miR-196a-3p	8mer	-0.2082	86	158	-20.18
hsa_circ_0137263	chr8	89647740	89725641	-	1	ciRNA	ENST00000661105	AF117829	mRNA	chr8:89647739-89725641	novel transcript	NA	NA	NA	hsa-miR-196a-5p	8mer	-0.15535	69	150	-22.21
hsa_circ_0137263	chr8	89647740	89725641	-	1	ciRNA	ENST00000661105	AF117829	mRNA	chr8:89647739-89725641	novel transcript	NA	NA	NA	hsa-miR-197-3p	m8	-0.1425	73	159	-33.39
hsa_circ_0137263	chr8	89647740	89725641	-	1	ciRNA	ENST00000661105	AF117829	mRNA	chr8:89647739-89725641	novel transcript	NA	NA	NA	hsa-miR-197-5p	8mer	-0.1462	70	156	-32.73
hsa_circ_0137263	chr8	89647740	89725641	-	1	ciRNA	ENST00000661105	AF117829	mRNA	chr8:89647739-89725641	novel transcript	NA	NA	NA	hsa-miR-198	m8	-0.149	72	161	-28.15
hsa_circ_0137263	chr8	89647740	89725641	-	1	ciRNA	ENST00000661105	AF117829	mRNA	chr8:89647739-89725641	novel transcript	NA	NA	NA	hsa-miR-199a-5p	8mer	-0.2832	91	153	-28.41
hsa_circ_0137263	chr8	89647740	89725641	-	1	ciRNA	ENST00000661105	AF117829	mRNA	chr8:89647739-89725641	novel transcript	NA	NA	NA	hsa-miR-199b-5p	8mer	-0.2832	91	157	-25.64
hsa_circ_0137263	chr8	89647740	89725641	-	1	ciRNA	ENST00000661105	AF117829	mRNA	chr8:89647739-89725641	novel transcript	NA	NA	NA	hsa-miR-19a-3p	8mer	-0.27635	89	170	-18.95
hsa_circ_0137263	chr8	89647740	89725641	-	1	ciRNA	ENST00000661105	AF117829	mRNA	chr8:89647739-89725641	novel transcript	NA	NA	NA	hsa-miR-19a-5p	1a	-0.1383	61	147	-14.24
hsa_circ_0137263	chr8	89647740	89725641	-	1	ciRNA	ENST00000661105	AF117829	mRNA	chr8:89647739-89725641	novel transcript	NA	NA	NA	hsa-miR-19b-1-5p	1a	-0.14885	65	153	-23.97
hsa_circ_0137263	chr8	89647740	89725641	-	1	ciRNA	ENST00000661105	AF117829	mRNA	chr8:89647739-89725641	novel transcript	NA	NA	NA	hsa-miR-19b-2-5p	1a	-0.14885	65	151	-21.02
hsa_circ_0137263	chr8	89647740	89725641	-	1	ciRNA	ENST00000661105	AF117829	mRNA	chr8:89647739-89725641	novel transcript	NA	NA	NA	hsa-miR-19b-3p	8mer	-0.2784	89	174	-20.38
hsa_circ_0137263	chr8	89647740	89725641	-	1	ciRNA	ENST00000661105	AF117829	mRNA	chr8:89647739-89725641	novel transcript	NA	NA	NA	hsa-miR-200b-5p	1a	-0.10465	52	157	-29.54
hsa_circ_0137263	chr8	89647740	89725641	-	1	ciRNA	ENST00000661105	AF117829	mRNA	chr8:89647739-89725641	novel transcript	NA	NA	NA	hsa-miR-203a-3p	m8	-0.188	81	158	-22.74
hsa_circ_0137263	chr8	89647740	89725641	-	1	ciRNA	ENST00000661105	AF117829	mRNA	chr8:89647739-89725641	novel transcript	NA	NA	NA	hsa-miR-203a-5p	8mer	-0.2352	89	168	-20.31
hsa_circ_0137263	chr8	89647740	89725641	-	1	ciRNA	ENST00000661105	AF117829	mRNA	chr8:89647739-89725641	novel transcript	NA	NA	NA	hsa-miR-204-3p	m8	-0.107	58	153	-26.76
hsa_circ_0137263	chr8	89647740	89725641	-	1	ciRNA	ENST00000661105	AF117829	mRNA	chr8:89647739-89725641	novel transcript	NA	NA	NA	hsa-miR-204-5p	8mer	-0.2772	90	159	-25.6
hsa_circ_0137263	chr8	89647740	89725641	-	1	ciRNA	ENST00000661105	AF117829	mRNA	chr8:89647739-89725641	novel transcript	NA	NA	NA	hsa-miR-205-3p	1a	-0.1584	70	165	-27.79
hsa_circ_0137263	chr8	89647740	89725641	-	1	ciRNA	ENST00000661105	AF117829	mRNA	chr8:89647739-89725641	novel transcript	NA	NA	NA	hsa-miR-205-5p	8mer	-0.1982	80	159	-27.24
hsa_circ_0137263	chr8	89647740	89725641	-	1	ciRNA	ENST00000661105	AF117829	mRNA	chr8:89647739-89725641	novel transcript	NA	NA	NA	hsa-miR-208a-3p	m8	-0.176	90	171	-19.28
hsa_circ_0137263	chr8	89647740	89725641	-	1	ciRNA	ENST00000661105	AF117829	mRNA	chr8:89647739-89725641	novel transcript	NA	NA	NA	hsa-miR-208a-5p	8mer	-0.2141	85	153	-16.11
hsa_circ_0137263	chr8	89647740	89725641	-	1	ciRNA	ENST00000661105	AF117829	mRNA	chr8:89647739-89725641	novel transcript	NA	NA	NA	hsa-miR-20a-3p	8mer	-0.23145	84	166	-19.14
hsa_circ_0137263	chr8	89647740	89725641	-	1	ciRNA	ENST00000661105	AF117829	mRNA	chr8:89647739-89725641	novel transcript	NA	NA	NA	hsa-miR-20a-5p	8mer	-0.2212	89	167	-20.48
hsa_circ_0137263	chr8	89647740	89725641	-	1	ciRNA	ENST00000661105	AF117829	mRNA	chr8:89647739-89725641	novel transcript	NA	NA	NA	hsa-miR-210-3p	m8	-0.23	89	160	-23.11
hsa_circ_0137263	chr8	89647740	89725641	-	1	ciRNA	ENST00000661105	AF117829	mRNA	chr8:89647739-89725641	novel transcript	NA	NA	NA	hsa-miR-210-5p	1a	-0.09965	67	156	-31.13
hsa_circ_0137263	chr8	89647740	89725641	-	1	ciRNA	ENST00000661105	AF117829	mRNA	chr8:89647739-89725641	novel transcript	NA	NA	NA	hsa-miR-211-3p	1a	-0.11585	65	158	-30.14
hsa_circ_0137263	chr8	89647740	89725641	-	1	ciRNA	ENST00000661105	AF117829	mRNA	chr8:89647739-89725641	novel transcript	NA	NA	NA	hsa-miR-211-5p	8mer	-0.2772	90	161	-28.47
hsa_circ_0137263	chr8	89647740	89725641	-	1	ciRNA	ENST00000661105	AF117829	mRNA	chr8:89647739-89725641	novel transcript	NA	NA	NA	hsa-miR-212-3p	8mer	-0.17725	78	165	-27.42
hsa_circ_0137263	chr8	89647740	89725641	-	1	ciRNA	ENST00000661105	AF117829	mRNA	chr8:89647739-89725641	novel transcript	NA	NA	NA	hsa-miR-212-5p	m8	-0.206	84	176	-24.79
hsa_circ_0137263	chr8	89647740	89725641	-	1	ciRNA	ENST00000661105	AF117829	mRNA	chr8:89647739-89725641	novel transcript	NA	NA	NA	hsa-miR-21-3p	8mer	-0.2832	93	151	-25.62
hsa_circ_0137263	chr8	89647740	89725641	-	1	ciRNA	ENST00000661105	AF117829	mRNA	chr8:89647739-89725641	novel transcript	NA	NA	NA	hsa-miR-214-3p	m8	-0.181	82	146	-23.3
hsa_circ_0137263	chr8	89647740	89725641	-	1	ciRNA	ENST00000661105	AF117829	mRNA	chr8:89647739-89725641	novel transcript	NA	NA	NA	hsa-miR-214-5p	1a	-0.03965	51	143	-22.58
hsa_circ_0137263	chr8	89647740	89725641	-	1	ciRNA	ENST00000661105	AF117829	mRNA	chr8:89647739-89725641	novel transcript	NA	NA	NA	hsa-miR-215-3p	8mer	-0.1862	79	171	-24.14
hsa_circ_0137263	chr8	89647740	89725641	-	1	ciRNA	ENST00000661105	AF117829	mRNA	chr8:89647739-89725641	novel transcript	NA	NA	NA	hsa-miR-215-5p	8mer	-0.13325	72	148	-18.32
hsa_circ_0137263	chr8	89647740	89725641	-	1	ciRNA	ENST00000661105	AF117829	mRNA	chr8:89647739-89725641	novel transcript	NA	NA	NA	hsa-miR-21-5p	m8	-0.1525	66	156	-25.69
hsa_circ_0137263	chr8	89647740	89725641	-	1	ciRNA	ENST00000661105	AF117829	mRNA	chr8:89647739-89725641	novel transcript	NA	NA	NA	hsa-miR-216a-3p	m8	-0.1545	75	169	-29.27
hsa_circ_0137263	chr8	89647740	89725641	-	1	ciRNA	ENST00000661105	AF117829	mRNA	chr8:89647739-89725641	novel transcript	NA	NA	NA	hsa-miR-216a-5p	8mer	-0.26825	92	170	-23.41
hsa_circ_0137263	chr8	89647740	89725641	-	1	ciRNA	ENST00000661105	AF117829	mRNA	chr8:89647739-89725641	novel transcript	NA	NA	NA	hsa-miR-217-5p	m8	-0.1315	56	158	-22.99
hsa_circ_0137263	chr8	89647740	89725641	-	1	ciRNA	ENST00000661105	AF117829	mRNA	chr8:89647739-89725641	novel transcript	NA	NA	NA	hsa-miR-218-1-3p	1a	-0.19165	78	158	-18.19
hsa_circ_0137263	chr8	89647740	89725641	-	1	ciRNA	ENST00000661105	AF117829	mRNA	chr8:89647739-89725641	novel transcript	NA	NA	NA	hsa-miR-218-2-3p	8mer	-0.25315	91	159	-23.97
hsa_circ_0137263	chr8	89647740	89725641	-	1	ciRNA	ENST00000661105	AF117829	mRNA	chr8:89647739-89725641	novel transcript	NA	NA	NA	hsa-miR-218-5p	8mer	-0.19215	77	162	-14.48
hsa_circ_0137263	chr8	89647740	89725641	-	1	ciRNA	ENST00000661105	AF117829	mRNA	chr8:89647739-89725641	novel transcript	NA	NA	NA	hsa-miR-219a-1-3p	8mer	-0.1132	52	155	-23.74
hsa_circ_0137263	chr8	89647740	89725641	-	1	ciRNA	ENST00000661105	AF117829	mRNA	chr8:89647739-89725641	novel transcript	NA	NA	NA	hsa-miR-219a-5p	m8	-0.106	54	145	-14.26
hsa_circ_0137263	chr8	89647740	89725641	-	1	ciRNA	ENST00000661105	AF117829	mRNA	chr8:89647739-89725641	novel transcript	NA	NA	NA	hsa-miR-221-3p	m8	-0.211	85	156	-19.07
hsa_circ_0137263	chr8	89647740	89725641	-	1	ciRNA	ENST00000661105	AF117829	mRNA	chr8:89647739-89725641	novel transcript	NA	NA	NA	hsa-miR-221-5p	m8	-0.0745	54	161	-19.52
hsa_circ_0137263	chr8	89647740	89725641	-	1	ciRNA	ENST00000661105	AF117829	mRNA	chr8:89647739-89725641	novel transcript	NA	NA	NA	hsa-miR-222-3p	m8	-0.18	78	150	-22.69
hsa_circ_0137263	chr8	89647740	89725641	-	1	ciRNA	ENST00000661105	AF117829	mRNA	chr8:89647739-89725641	novel transcript	NA	NA	NA	hsa-miR-222-5p	8mer	-0.1254	57	174	-25.06
hsa_circ_0137263	chr8	89647740	89725641	-	1	ciRNA	ENST00000661105	AF117829	mRNA	chr8:89647739-89725641	novel transcript	NA	NA	NA	hsa-miR-223-3p	8mer	-0.2122	81	158	-21.1
hsa_circ_0137263	chr8	89647740	89725641	-	1	ciRNA	ENST00000661105	AF117829	mRNA	chr8:89647739-89725641	novel transcript	NA	NA	NA	hsa-miR-223-5p	m8	-0.1405	63	158	-17.47
hsa_circ_0137263	chr8	89647740	89725641	-	1	ciRNA	ENST00000661105	AF117829	mRNA	chr8:89647739-89725641	novel transcript	NA	NA	NA	hsa-miR-22-3p	1a	-0.1572	70	169	-25.07
hsa_circ_0137263	chr8	89647740	89725641	-	1	ciRNA	ENST00000661105	AF117829	mRNA	chr8:89647739-89725641	novel transcript	NA	NA	NA	hsa-miR-224-3p	m8	-0.2505	91	160	-24.62
hsa_circ_0137263	chr8	89647740	89725641	-	1	ciRNA	ENST00000661105	AF117829	mRNA	chr8:89647739-89725641	novel transcript	NA	NA	NA	hsa-miR-224-5p	8mer	-0.1572	69	159	-25.79
hsa_circ_0137263	chr8	89647740	89725641	-	1	ciRNA	ENST00000661105	AF117829	mRNA	chr8:89647739-89725641	novel transcript	NA	NA	NA	hsa-miR-22-5p	m8	-0.1735	65	155	-20.7
hsa_circ_0137263	chr8	89647740	89725641	-	1	ciRNA	ENST00000661105	AF117829	mRNA	chr8:89647739-89725641	novel transcript	NA	NA	NA	hsa-miR-23a-3p	1a	-0.1684	70	159	-25.41
hsa_circ_0137263	chr8	89647740	89725641	-	1	ciRNA	ENST00000661105	AF117829	mRNA	chr8:89647739-89725641	novel transcript	NA	NA	NA	hsa-miR-23a-5p	8mer	-0.1852	83	146	-36.07
hsa_circ_0137263	chr8	89647740	89725641	-	1	ciRNA	ENST00000661105	AF117829	mRNA	chr8:89647739-89725641	novel transcript	NA	NA	NA	hsa-miR-23b-3p	1a	-0.1684	70	166	-24.91
hsa_circ_0137263	chr8	89647740	89725641	-	1	ciRNA	ENST00000661105	AF117829	mRNA	chr8:89647739-89725641	novel transcript	NA	NA	NA	hsa-miR-23b-5p	8mer	-0.18725	83	155	-28.4
hsa_circ_0137263	chr8	89647740	89725641	-	1	ciRNA	ENST00000661105	AF117829	mRNA	chr8:89647739-89725641	novel transcript	NA	NA	NA	hsa-miR-24-1-5p	8mer	-0.21815	87	151	-20.44
hsa_circ_0137263	chr8	89647740	89725641	-	1	ciRNA	ENST00000661105	AF117829	mRNA	chr8:89647739-89725641	novel transcript	NA	NA	NA	hsa-miR-24-2-5p	8mer	-0.21815	87	153	-20.27
hsa_circ_0137263	chr8	89647740	89725641	-	1	ciRNA	ENST00000661105	AF117829	mRNA	chr8:89647739-89725641	novel transcript	NA	NA	NA	hsa-miR-24-3p	m8	-0.112	79	169	-25.9
hsa_circ_0137263	chr8	89647740	89725641	-	1	ciRNA	ENST00000661105	AF117829	mRNA	chr8:89647739-89725641	novel transcript	NA	NA	NA	hsa-miR-25-3p	m8	-0.102	57	154	-25.48
hsa_circ_0137263	chr8	89647740	89725641	-	1	ciRNA	ENST00000661105	AF117829	mRNA	chr8:89647739-89725641	novel transcript	NA	NA	NA	hsa-miR-25-5p	m8	-0.046	62	151	-22.09
hsa_circ_0137263	chr8	89647740	89725641	-	1	ciRNA	ENST00000661105	AF117829	mRNA	chr8:89647739-89725641	novel transcript	NA	NA	NA	hsa-miR-26a-1-3p	m8	-0.156	68	161	-22.65
hsa_circ_0137263	chr8	89647740	89725641	-	1	ciRNA	ENST00000661105	AF117829	mRNA	chr8:89647739-89725641	novel transcript	NA	NA	NA	hsa-miR-26a-5p	m8	-0.135	65	159	-21.92
hsa_circ_0137263	chr8	89647740	89725641	-	1	ciRNA	ENST00000661105	AF117829	mRNA	chr8:89647739-89725641	novel transcript	NA	NA	NA	hsa-miR-26b-3p	m8	-0.138	54	161	-20.77
hsa_circ_0137263	chr8	89647740	89725641	-	1	ciRNA	ENST00000661105	AF117829	mRNA	chr8:89647739-89725641	novel transcript	NA	NA	NA	hsa-miR-26b-5p	m8	-0.135	65	155	-19.53
hsa_circ_0137263	chr8	89647740	89725641	-	1	ciRNA	ENST00000661105	AF117829	mRNA	chr8:89647739-89725641	novel transcript	NA	NA	NA	hsa-miR-27a-3p	m8	-0.124	57	167	-22.5
hsa_circ_0137263	chr8	89647740	89725641	-	1	ciRNA	ENST00000661105	AF117829	mRNA	chr8:89647739-89725641	novel transcript	NA	NA	NA	hsa-miR-27a-5p	8mer	-0.1462	78	146	-21.3
hsa_circ_0137263	chr8	89647740	89725641	-	1	ciRNA	ENST00000661105	AF117829	mRNA	chr8:89647739-89725641	novel transcript	NA	NA	NA	hsa-miR-27b-3p	m8	-0.124	57	167	-25.95
hsa_circ_0137263	chr8	89647740	89725641	-	1	ciRNA	ENST00000661105	AF117829	mRNA	chr8:89647739-89725641	novel transcript	NA	NA	NA	hsa-miR-27b-5p	m8	-0.203	89	159	-14.43
hsa_circ_0137263	chr8	89647740	89725641	-	1	ciRNA	ENST00000661105	AF117829	mRNA	chr8:89647739-89725641	novel transcript	NA	NA	NA	hsa-miR-28-5p	m8	-0.171	80	164	-22.8
hsa_circ_0137263	chr8	89647740	89725641	-	1	ciRNA	ENST00000661105	AF117829	mRNA	chr8:89647739-89725641	novel transcript	NA	NA	NA	hsa-miR-29a-3p	8mer	-0.24725	89	163	-26.16
hsa_circ_0137263	chr8	89647740	89725641	-	1	ciRNA	ENST00000661105	AF117829	mRNA	chr8:89647739-89725641	novel transcript	NA	NA	NA	hsa-miR-29a-5p	m8	-0.138	52	162	-21.82
hsa_circ_0137263	chr8	89647740	89725641	-	1	ciRNA	ENST00000661105	AF117829	mRNA	chr8:89647739-89725641	novel transcript	NA	NA	NA	hsa-miR-29b-1-5p	m8	-0.1305	53	164	-24.32
hsa_circ_0137263	chr8	89647740	89725641	-	1	ciRNA	ENST00000661105	AF117829	mRNA	chr8:89647739-89725641	novel transcript	NA	NA	NA	hsa-miR-29b-2-5p	8mer	-0.3812	96	163	-25.29
hsa_circ_0137263	chr8	89647740	89725641	-	1	ciRNA	ENST00000661105	AF117829	mRNA	chr8:89647739-89725641	novel transcript	NA	NA	NA	hsa-miR-29b-3p	8mer	-0.24725	89	168	-25.68
hsa_circ_0137263	chr8	89647740	89725641	-	1	ciRNA	ENST00000661105	AF117829	mRNA	chr8:89647739-89725641	novel transcript	NA	NA	NA	hsa-miR-30a-3p	m8	-0.1295	52	160	-19.09
hsa_circ_0137263	chr8	89647740	89725641	-	1	ciRNA	ENST00000661105	AF117829	mRNA	chr8:89647739-89725641	novel transcript	NA	NA	NA	hsa-miR-30a-5p	m8	-0.232	84	160	-17.29
hsa_circ_0137263	chr8	89647740	89725641	-	1	ciRNA	ENST00000661105	AF117829	mRNA	chr8:89647739-89725641	novel transcript	NA	NA	NA	hsa-miR-30b-3p	8mer	-0.1051	74	168	-29.14
hsa_circ_0137263	chr8	89647740	89725641	-	1	ciRNA	ENST00000661105	AF117829	mRNA	chr8:89647739-89725641	novel transcript	NA	NA	NA	hsa-miR-30b-5p	m8	-0.2165	80	156	-20
hsa_circ_0137263	chr8	89647740	89725641	-	1	ciRNA	ENST00000661105	AF117829	mRNA	chr8:89647739-89725641	novel transcript	NA	NA	NA	hsa-miR-30c-2-3p	m8	-0.108	75	161	-23.02
hsa_circ_0137263	chr8	89647740	89725641	-	1	ciRNA	ENST00000661105	AF117829	mRNA	chr8:89647739-89725641	novel transcript	NA	NA	NA	hsa-miR-30c-5p	m8	-0.2165	80	154	-21.74
hsa_circ_0137263	chr8	89647740	89725641	-	1	ciRNA	ENST00000661105	AF117829	mRNA	chr8:89647739-89725641	novel transcript	NA	NA	NA	hsa-miR-30d-3p	m8	-0.1295	52	163	-19.54
hsa_circ_0137263	chr8	89647740	89725641	-	1	ciRNA	ENST00000661105	AF117829	mRNA	chr8:89647739-89725641	novel transcript	NA	NA	NA	hsa-miR-30d-5p	m8	-0.232	84	160	-20.11
hsa_circ_0137263	chr8	89647740	89725641	-	1	ciRNA	ENST00000661105	AF117829	mRNA	chr8:89647739-89725641	novel transcript	NA	NA	NA	hsa-miR-31-3p	8mer	-0.2112	88	161	-20.63
hsa_circ_0137263	chr8	89647740	89725641	-	1	ciRNA	ENST00000661105	AF117829	mRNA	chr8:89647739-89725641	novel transcript	NA	NA	NA	hsa-miR-31-5p	8mer	-0.2332	88	149	-20.76
hsa_circ_0137263	chr8	89647740	89725641	-	1	ciRNA	ENST00000661105	AF117829	mRNA	chr8:89647739-89725641	novel transcript	NA	NA	NA	hsa-miR-32-3p	1a	-0.1762	81	165	-13.35
hsa_circ_0137263	chr8	89647740	89725641	-	1	ciRNA	ENST00000661105	AF117829	mRNA	chr8:89647739-89725641	novel transcript	NA	NA	NA	hsa-miR-32-5p	m8	-0.102	54	158	-18.86
hsa_circ_0137263	chr8	89647740	89725641	-	1	ciRNA	ENST00000661105	AF117829	mRNA	chr8:89647739-89725641	novel transcript	NA	NA	NA	hsa-miR-33a-3p	m8	-0.1585	60	159	-18.5
hsa_circ_0137263	chr8	89647740	89725641	-	1	ciRNA	ENST00000661105	AF117829	mRNA	chr8:89647739-89725641	novel transcript	NA	NA	NA	hsa-miR-33a-5p	8mer	-0.13515	64	150	-19.85
hsa_circ_0137263	chr8	89647740	89725641	-	1	ciRNA	ENST00000661105	AF117829	mRNA	chr8:89647739-89725641	novel transcript	NA	NA	NA	hsa-miR-34a-3p	8mer	-0.1782	74	163	-24.16
hsa_circ_0137263	chr8	89647740	89725641	-	1	ciRNA	ENST00000661105	AF117829	mRNA	chr8:89647739-89725641	novel transcript	NA	NA	NA	hsa-miR-7-1-3p	m8	-0.127	55	161	-17.67
hsa_circ_0137263	chr8	89647740	89725641	-	1	ciRNA	ENST00000661105	AF117829	mRNA	chr8:89647739-89725641	novel transcript	NA	NA	NA	hsa-miR-7-2-3p	m8	-0.1425	63	157	-14.68
hsa_circ_0137263	chr8	89647740	89725641	-	1	ciRNA	ENST00000661105	AF117829	mRNA	chr8:89647739-89725641	novel transcript	NA	NA	NA	hsa-miR-7-5p	8mer	-0.2702	88	164	-22.39
hsa_circ_0137263	chr8	89647740	89725641	-	1	ciRNA	ENST00000661105	AF117829	mRNA	chr8:89647739-89725641	novel transcript	NA	NA	NA	hsa-miR-92a-1-5p	m8	-0.134	70	158	-22.07
hsa_circ_0137263	chr8	89647740	89725641	-	1	ciRNA	ENST00000661105	AF117829	mRNA	chr8:89647739-89725641	novel transcript	NA	NA	NA	hsa-miR-92a-2-5p	8mer	-0.2982	96	153	-25.66
hsa_circ_0137263	chr8	89647740	89725641	-	1	ciRNA	ENST00000661105	AF117829	mRNA	chr8:89647739-89725641	novel transcript	NA	NA	NA	hsa-miR-92a-3p	m8	-0.1175	66	152	-26.58
hsa_circ_0137263	chr8	89647740	89725641	-	1	ciRNA	ENST00000661105	AF117829	mRNA	chr8:89647739-89725641	novel transcript	NA	NA	NA	hsa-miR-93-3p	1a	-0.1422	66	162	-25.58
hsa_circ_0137263	chr8	89647740	89725641	-	1	ciRNA	ENST00000661105	AF117829	mRNA	chr8:89647739-89725641	novel transcript	NA	NA	NA	hsa-miR-93-5p	8mer	-0.2212	90	159	-25.77
hsa_circ_0137263	chr8	89647740	89725641	-	1	ciRNA	ENST00000661105	AF117829	mRNA	chr8:89647739-89725641	novel transcript	NA	NA	NA	hsa-miR-95-3p	8mer	-0.1392	69	154	-18.61
hsa_circ_0137263	chr8	89647740	89725641	-	1	ciRNA	ENST00000661105	AF117829	mRNA	chr8:89647739-89725641	novel transcript	NA	NA	NA	hsa-miR-95-5p	m8	-0.1485	54	161	-14.81
hsa_circ_0137263	chr8	89647740	89725641	-	1	ciRNA	ENST00000661105	AF117829	mRNA	chr8:89647739-89725641	novel transcript	NA	NA	NA	hsa-miR-96-3p	m8	-0.1645	68	162	-21.48
hsa_circ_0137263	chr8	89647740	89725641	-	1	ciRNA	ENST00000661105	AF117829	mRNA	chr8:89647739-89725641	novel transcript	NA	NA	NA	hsa-miR-96-5p	8mer	-0.1772	78	159	-19.59
hsa_circ_0137263	chr8	89647740	89725641	-	1	ciRNA	ENST00000661105	AF117829	mRNA	chr8:89647739-89725641	novel transcript	NA	NA	NA	hsa-miR-98-3p	8mer	-0.2443	89	145	-15
hsa_circ_0137263	chr8	89647740	89725641	-	1	ciRNA	ENST00000661105	AF117829	mRNA	chr8:89647739-89725641	novel transcript	NA	NA	NA	hsa-miR-98-5p	1a	-0.1123	54	155	-20.94
hsa_circ_0137263	chr8	89647740	89725641	-	1	ciRNA	ENST00000661105	AF117829	mRNA	chr8:89647739-89725641	novel transcript	NA	NA	NA	hsa-miR-99a-3p	m8	-0.157	81	149	-18.06
hsa_circ_0004342	chr6	167870386	167889326	+	5	circRNA	ENST00000344191	AFDN	mRNA	chr6:167864746-167870385|chr6:167889326-167890861	afadin, adherens junction formation factor [Source:HGNC Symbol;Acc:HGNC:7137]	GO:0005515(protein binding);GO:0005654(nucleoplasm);GO:0005737(cytoplasm);GO:0005829(cytosol);GO:0005886(plasma membrane);GO:0005911(cell-cell junction);GO:0005912(adherens junction);GO:0007155(cell adhesion);GO:0007165(signal transduction);GO:0007267(cell-cell signaling);GO:0008022(protein C-terminus binding);GO:0010628(positive regulation of gene expression);GO:0016607(nuclear speck);GO:0017016…	04014(Ras signaling pathway);04015(Rap1 signaling pathway);04024(cAMP signaling pathway);04520(Adherens junction);04530(Tight junction);04670(Leukocyte transendothelial migration)	NA	hsa-let-7c-3p	8mer	-0.3703	97	153	-11.72
hsa_circ_0004342	chr6	167870386	167889326	+	5	circRNA	ENST00000344191	AFDN	mRNA	chr6:167864746-167870385|chr6:167889326-167890861	afadin, adherens junction formation factor [Source:HGNC Symbol;Acc:HGNC:7137]	GO:0005515(protein binding);GO:0005654(nucleoplasm);GO:0005737(cytoplasm);GO:0005829(cytosol);GO:0005886(plasma membrane);GO:0005911(cell-cell junction);GO:0005912(adherens junction);GO:0007155(cell adhesion);GO:0007165(signal transduction);GO:0007267(cell-cell signaling);GO:0008022(protein C-terminus binding);GO:0010628(positive regulation of gene expression);GO:0016607(nuclear speck);GO:0017016…	04014(Ras signaling pathway);04015(Rap1 signaling pathway);04024(cAMP signaling pathway);04520(Adherens junction);04530(Tight junction);04670(Leukocyte transendothelial migration)	NA	hsa-miR-129-5p	m8	-0.1615	79	153	-12.23
hsa_circ_0004342	chr6	167870386	167889326	+	5	circRNA	ENST00000344191	AFDN	mRNA	chr6:167864746-167870385|chr6:167889326-167890861	afadin, adherens junction formation factor [Source:HGNC Symbol;Acc:HGNC:7137]	GO:0005515(protein binding);GO:0005654(nucleoplasm);GO:0005737(cytoplasm);GO:0005829(cytosol);GO:0005886(plasma membrane);GO:0005911(cell-cell junction);GO:0005912(adherens junction);GO:0007155(cell adhesion);GO:0007165(signal transduction);GO:0007267(cell-cell signaling);GO:0008022(protein C-terminus binding);GO:0010628(positive regulation of gene expression);GO:0016607(nuclear speck);GO:0017016…	04014(Ras signaling pathway);04015(Rap1 signaling pathway);04024(cAMP signaling pathway);04520(Adherens junction);04530(Tight junction);04670(Leukocyte transendothelial migration)	NA	hsa-miR-130a-5p	8mer	-0.29525	91	162	-19.28
hsa_circ_0004342	chr6	167870386	167889326	+	5	circRNA	ENST00000344191	AFDN	mRNA	chr6:167864746-167870385|chr6:167889326-167890861	afadin, adherens junction formation factor [Source:HGNC Symbol;Acc:HGNC:7137]	GO:0005515(protein binding);GO:0005654(nucleoplasm);GO:0005737(cytoplasm);GO:0005829(cytosol);GO:0005886(plasma membrane);GO:0005911(cell-cell junction);GO:0005912(adherens junction);GO:0007155(cell adhesion);GO:0007165(signal transduction);GO:0007267(cell-cell signaling);GO:0008022(protein C-terminus binding);GO:0010628(positive regulation of gene expression);GO:0016607(nuclear speck);GO:0017016…	04014(Ras signaling pathway);04015(Rap1 signaling pathway);04024(cAMP signaling pathway);04520(Adherens junction);04530(Tight junction);04670(Leukocyte transendothelial migration)	NA	hsa-miR-135a-2-3p	8mer	-0.4561	99	145	-15.33
hsa_circ_0004342	chr6	167870386	167889326	+	5	circRNA	ENST00000344191	AFDN	mRNA	chr6:167864746-167870385|chr6:167889326-167890861	afadin, adherens junction formation factor [Source:HGNC Symbol;Acc:HGNC:7137]	GO:0005515(protein binding);GO:0005654(nucleoplasm);GO:0005737(cytoplasm);GO:0005829(cytosol);GO:0005886(plasma membrane);GO:0005911(cell-cell junction);GO:0005912(adherens junction);GO:0007155(cell adhesion);GO:0007165(signal transduction);GO:0007267(cell-cell signaling);GO:0008022(protein C-terminus binding);GO:0010628(positive regulation of gene expression);GO:0016607(nuclear speck);GO:0017016…	04014(Ras signaling pathway);04015(Rap1 signaling pathway);04024(cAMP signaling pathway);04520(Adherens junction);04530(Tight junction);04670(Leukocyte transendothelial migration)	NA	hsa-miR-148a-5p	m8	-0.161	61	158	-19.16
hsa_circ_0004342	chr6	167870386	167889326	+	5	circRNA	ENST00000344191	AFDN	mRNA	chr6:167864746-167870385|chr6:167889326-167890861	afadin, adherens junction formation factor [Source:HGNC Symbol;Acc:HGNC:7137]	GO:0005515(protein binding);GO:0005654(nucleoplasm);GO:0005737(cytoplasm);GO:0005829(cytosol);GO:0005886(plasma membrane);GO:0005911(cell-cell junction);GO:0005912(adherens junction);GO:0007155(cell adhesion);GO:0007165(signal transduction);GO:0007267(cell-cell signaling);GO:0008022(protein C-terminus binding);GO:0010628(positive regulation of gene expression);GO:0016607(nuclear speck);GO:0017016…	04014(Ras signaling pathway);04015(Rap1 signaling pathway);04024(cAMP signaling pathway);04520(Adherens junction);04530(Tight junction);04670(Leukocyte transendothelial migration)	NA	hsa-miR-214-3p	m8	-0.2365	90	140	-15.39
hsa_circ_0004342	chr6	167870386	167889326	+	5	circRNA	ENST00000344191	AFDN	mRNA	chr6:167864746-167870385|chr6:167889326-167890861	afadin, adherens junction formation factor [Source:HGNC Symbol;Acc:HGNC:7137]	GO:0005515(protein binding);GO:0005654(nucleoplasm);GO:0005737(cytoplasm);GO:0005829(cytosol);GO:0005886(plasma membrane);GO:0005911(cell-cell junction);GO:0005912(adherens junction);GO:0007155(cell adhesion);GO:0007165(signal transduction);GO:0007267(cell-cell signaling);GO:0008022(protein C-terminus binding);GO:0010628(positive regulation of gene expression);GO:0016607(nuclear speck);GO:0017016…	04014(Ras signaling pathway);04015(Rap1 signaling pathway);04024(cAMP signaling pathway);04520(Adherens junction);04530(Tight junction);04670(Leukocyte transendothelial migration)	NA	hsa-miR-214-5p	8mer	-0.33225	97	146	-17.91
hsa_circ_0004342	chr6	167870386	167889326	+	5	circRNA	ENST00000344191	AFDN	mRNA	chr6:167864746-167870385|chr6:167889326-167890861	afadin, adherens junction formation factor [Source:HGNC Symbol;Acc:HGNC:7137]	GO:0005515(protein binding);GO:0005654(nucleoplasm);GO:0005737(cytoplasm);GO:0005829(cytosol);GO:0005886(plasma membrane);GO:0005911(cell-cell junction);GO:0005912(adherens junction);GO:0007155(cell adhesion);GO:0007165(signal transduction);GO:0007267(cell-cell signaling);GO:0008022(protein C-terminus binding);GO:0010628(positive regulation of gene expression);GO:0016607(nuclear speck);GO:0017016…	04014(Ras signaling pathway);04015(Rap1 signaling pathway);04024(cAMP signaling pathway);04520(Adherens junction);04530(Tight junction);04670(Leukocyte transendothelial migration)	NA	hsa-miR-218-2-3p	m8	-0.237	89	155	-14.52
hsa_circ_0004342	chr6	167870386	167889326	+	5	circRNA	ENST00000344191	AFDN	mRNA	chr6:167864746-167870385|chr6:167889326-167890861	afadin, adherens junction formation factor [Source:HGNC Symbol;Acc:HGNC:7137]	GO:0005515(protein binding);GO:0005654(nucleoplasm);GO:0005737(cytoplasm);GO:0005829(cytosol);GO:0005886(plasma membrane);GO:0005911(cell-cell junction);GO:0005912(adherens junction);GO:0007155(cell adhesion);GO:0007165(signal transduction);GO:0007267(cell-cell signaling);GO:0008022(protein C-terminus binding);GO:0010628(positive regulation of gene expression);GO:0016607(nuclear speck);GO:0017016…	04014(Ras signaling pathway);04015(Rap1 signaling pathway);04024(cAMP signaling pathway);04520(Adherens junction);04530(Tight junction);04670(Leukocyte transendothelial migration)	NA	hsa-miR-29b-1-5p	m8	-0.1285	52	149	-20.48
hsa_circ_0004342	chr6	167870386	167889326	+	5	circRNA	ENST00000344191	AFDN	mRNA	chr6:167864746-167870385|chr6:167889326-167890861	afadin, adherens junction formation factor [Source:HGNC Symbol;Acc:HGNC:7137]	GO:0005515(protein binding);GO:0005654(nucleoplasm);GO:0005737(cytoplasm);GO:0005829(cytosol);GO:0005886(plasma membrane);GO:0005911(cell-cell junction);GO:0005912(adherens junction);GO:0007155(cell adhesion);GO:0007165(signal transduction);GO:0007267(cell-cell signaling);GO:0008022(protein C-terminus binding);GO:0010628(positive regulation of gene expression);GO:0016607(nuclear speck);GO:0017016…	04014(Ras signaling pathway);04015(Rap1 signaling pathway);04024(cAMP signaling pathway);04520(Adherens junction);04530(Tight junction);04670(Leukocyte transendothelial migration)	NA	hsa-miR-29b-2-5p	1a	-0.1882	78	150	-19.96
hsa_circ_0004342	chr6	167870386	167889326	+	5	circRNA	ENST00000344191	AFDN	mRNA	chr6:167864746-167870385|chr6:167889326-167890861	afadin, adherens junction formation factor [Source:HGNC Symbol;Acc:HGNC:7137]	GO:0005515(protein binding);GO:0005654(nucleoplasm);GO:0005737(cytoplasm);GO:0005829(cytosol);GO:0005886(plasma membrane);GO:0005911(cell-cell junction);GO:0005912(adherens junction);GO:0007155(cell adhesion);GO:0007165(signal transduction);GO:0007267(cell-cell signaling);GO:0008022(protein C-terminus binding);GO:0010628(positive regulation of gene expression);GO:0016607(nuclear speck);GO:0017016…	04014(Ras signaling pathway);04015(Rap1 signaling pathway);04024(cAMP signaling pathway);04520(Adherens junction);04530(Tight junction);04670(Leukocyte transendothelial migration)	NA	hsa-miR-7-1-3p	m8	-0.165	71	152	-13.91
hsa_circ_0004342	chr6	167870386	167889326	+	5	circRNA	ENST00000344191	AFDN	mRNA	chr6:167864746-167870385|chr6:167889326-167890861	afadin, adherens junction formation factor [Source:HGNC Symbol;Acc:HGNC:7137]	GO:0005515(protein binding);GO:0005654(nucleoplasm);GO:0005737(cytoplasm);GO:0005829(cytosol);GO:0005886(plasma membrane);GO:0005911(cell-cell junction);GO:0005912(adherens junction);GO:0007155(cell adhesion);GO:0007165(signal transduction);GO:0007267(cell-cell signaling);GO:0008022(protein C-terminus binding);GO:0010628(positive regulation of gene expression);GO:0016607(nuclear speck);GO:0017016…	04014(Ras signaling pathway);04015(Rap1 signaling pathway);04024(cAMP signaling pathway);04520(Adherens junction);04530(Tight junction);04670(Leukocyte transendothelial migration)	NA	hsa-miR-7-2-3p	m8	-0.165	71	153	-14.01
ciRNA2838	chr10	70121899	70123244	-	1	ciRNA	ENST00000373248	AIFM2	mRNA	chr10:70121898-70123244	apoptosis inducing factor mitochondria associated 2 [Source:HGNC Symbol;Acc:HGNC:21411]	GO:0003677(DNA binding);GO:0004174(electron-transferring-flavoprotein dehydrogenase activity);GO:0005515(protein binding);GO:0005615(extracellular space);GO:0005634(nucleus);GO:0005737(cytoplasm);GO:0005739(mitochondrion);GO:0005741(mitochondrial outer membrane);GO:0005811(lipid droplet);GO:0005829(cytosol);GO:0005886(plasma membrane);GO:0006743(ubiquinone metabolic process);GO:0008637(apoptotic …	04115(p53 signaling pathway)	NA	hsa-miR-181a-5p	m8	-0.1765	73	146	-12.98
ciRNA2838	chr10	70121899	70123244	-	1	ciRNA	ENST00000373248	AIFM2	mRNA	chr10:70121898-70123244	apoptosis inducing factor mitochondria associated 2 [Source:HGNC Symbol;Acc:HGNC:21411]	GO:0003677(DNA binding);GO:0004174(electron-transferring-flavoprotein dehydrogenase activity);GO:0005515(protein binding);GO:0005615(extracellular space);GO:0005634(nucleus);GO:0005737(cytoplasm);GO:0005739(mitochondrion);GO:0005741(mitochondrial outer membrane);GO:0005811(lipid droplet);GO:0005829(cytosol);GO:0005886(plasma membrane);GO:0006743(ubiquinone metabolic process);GO:0008637(apoptotic …	04115(p53 signaling pathway)	NA	hsa-miR-181b-5p	m8	-0.1765	73	145	-20.25
ciRNA2838	chr10	70121899	70123244	-	1	ciRNA	ENST00000373248	AIFM2	mRNA	chr10:70121898-70123244	apoptosis inducing factor mitochondria associated 2 [Source:HGNC Symbol;Acc:HGNC:21411]	GO:0003677(DNA binding);GO:0004174(electron-transferring-flavoprotein dehydrogenase activity);GO:0005515(protein binding);GO:0005615(extracellular space);GO:0005634(nucleus);GO:0005737(cytoplasm);GO:0005739(mitochondrion);GO:0005741(mitochondrial outer membrane);GO:0005811(lipid droplet);GO:0005829(cytosol);GO:0005886(plasma membrane);GO:0006743(ubiquinone metabolic process);GO:0008637(apoptotic …	04115(p53 signaling pathway)	NA	hsa-miR-181c-5p	m8	-0.1765	75	140	-11.08
ciRNA2838	chr10	70121899	70123244	-	1	ciRNA	ENST00000373248	AIFM2	mRNA	chr10:70121898-70123244	apoptosis inducing factor mitochondria associated 2 [Source:HGNC Symbol;Acc:HGNC:21411]	GO:0003677(DNA binding);GO:0004174(electron-transferring-flavoprotein dehydrogenase activity);GO:0005515(protein binding);GO:0005615(extracellular space);GO:0005634(nucleus);GO:0005737(cytoplasm);GO:0005739(mitochondrion);GO:0005741(mitochondrial outer membrane);GO:0005811(lipid droplet);GO:0005829(cytosol);GO:0005886(plasma membrane);GO:0006743(ubiquinone metabolic process);GO:0008637(apoptotic …	04115(p53 signaling pathway)	NA	hsa-miR-187-5p	m8	-0.2195	86	170	-29.26
ciRNA2838	chr10	70121899	70123244	-	1	ciRNA	ENST00000373248	AIFM2	mRNA	chr10:70121898-70123244	apoptosis inducing factor mitochondria associated 2 [Source:HGNC Symbol;Acc:HGNC:21411]	GO:0003677(DNA binding);GO:0004174(electron-transferring-flavoprotein dehydrogenase activity);GO:0005515(protein binding);GO:0005615(extracellular space);GO:0005634(nucleus);GO:0005737(cytoplasm);GO:0005739(mitochondrion);GO:0005741(mitochondrial outer membrane);GO:0005811(lipid droplet);GO:0005829(cytosol);GO:0005886(plasma membrane);GO:0006743(ubiquinone metabolic process);GO:0008637(apoptotic …	04115(p53 signaling pathway)	NA	hsa-miR-196a-3p	m8	-0.2025	85	158	-18.93
ciRNA2838	chr10	70121899	70123244	-	1	ciRNA	ENST00000373248	AIFM2	mRNA	chr10:70121898-70123244	apoptosis inducing factor mitochondria associated 2 [Source:HGNC Symbol;Acc:HGNC:21411]	GO:0003677(DNA binding);GO:0004174(electron-transferring-flavoprotein dehydrogenase activity);GO:0005515(protein binding);GO:0005615(extracellular space);GO:0005634(nucleus);GO:0005737(cytoplasm);GO:0005739(mitochondrion);GO:0005741(mitochondrial outer membrane);GO:0005811(lipid droplet);GO:0005829(cytosol);GO:0005886(plasma membrane);GO:0006743(ubiquinone metabolic process);GO:0008637(apoptotic …	04115(p53 signaling pathway)	NA	hsa-miR-19a-5p	m8	-0.1715	75	152	-12
ciRNA2838	chr10	70121899	70123244	-	1	ciRNA	ENST00000373248	AIFM2	mRNA	chr10:70121898-70123244	apoptosis inducing factor mitochondria associated 2 [Source:HGNC Symbol;Acc:HGNC:21411]	GO:0003677(DNA binding);GO:0004174(electron-transferring-flavoprotein dehydrogenase activity);GO:0005515(protein binding);GO:0005615(extracellular space);GO:0005634(nucleus);GO:0005737(cytoplasm);GO:0005739(mitochondrion);GO:0005741(mitochondrial outer membrane);GO:0005811(lipid droplet);GO:0005829(cytosol);GO:0005886(plasma membrane);GO:0006743(ubiquinone metabolic process);GO:0008637(apoptotic …	04115(p53 signaling pathway)	NA	hsa-miR-19b-1-5p	m8	-0.156	68	151	-11.89
ciRNA2838	chr10	70121899	70123244	-	1	ciRNA	ENST00000373248	AIFM2	mRNA	chr10:70121898-70123244	apoptosis inducing factor mitochondria associated 2 [Source:HGNC Symbol;Acc:HGNC:21411]	GO:0003677(DNA binding);GO:0004174(electron-transferring-flavoprotein dehydrogenase activity);GO:0005515(protein binding);GO:0005615(extracellular space);GO:0005634(nucleus);GO:0005737(cytoplasm);GO:0005739(mitochondrion);GO:0005741(mitochondrial outer membrane);GO:0005811(lipid droplet);GO:0005829(cytosol);GO:0005886(plasma membrane);GO:0006743(ubiquinone metabolic process);GO:0008637(apoptotic …	04115(p53 signaling pathway)	NA	hsa-miR-19b-2-5p	m8	-0.156	68	151	-11.89
ciRNA2838	chr10	70121899	70123244	-	1	ciRNA	ENST00000373248	AIFM2	mRNA	chr10:70121898-70123244	apoptosis inducing factor mitochondria associated 2 [Source:HGNC Symbol;Acc:HGNC:21411]	GO:0003677(DNA binding);GO:0004174(electron-transferring-flavoprotein dehydrogenase activity);GO:0005515(protein binding);GO:0005615(extracellular space);GO:0005634(nucleus);GO:0005737(cytoplasm);GO:0005739(mitochondrion);GO:0005741(mitochondrial outer membrane);GO:0005811(lipid droplet);GO:0005829(cytosol);GO:0005886(plasma membrane);GO:0006743(ubiquinone metabolic process);GO:0008637(apoptotic …	04115(p53 signaling pathway)	NA	hsa-miR-21-3p	m8	-0.2365	87	154	-24.14
ciRNA2838	chr10	70121899	70123244	-	1	ciRNA	ENST00000373248	AIFM2	mRNA	chr10:70121898-70123244	apoptosis inducing factor mitochondria associated 2 [Source:HGNC Symbol;Acc:HGNC:21411]	GO:0003677(DNA binding);GO:0004174(electron-transferring-flavoprotein dehydrogenase activity);GO:0005515(protein binding);GO:0005615(extracellular space);GO:0005634(nucleus);GO:0005737(cytoplasm);GO:0005739(mitochondrion);GO:0005741(mitochondrial outer membrane);GO:0005811(lipid droplet);GO:0005829(cytosol);GO:0005886(plasma membrane);GO:0006743(ubiquinone metabolic process);GO:0008637(apoptotic …	04115(p53 signaling pathway)	NA	hsa-miR-221-5p	m8	-0.145	77	152	-16.74
ciRNA2838	chr10	70121899	70123244	-	1	ciRNA	ENST00000373248	AIFM2	mRNA	chr10:70121898-70123244	apoptosis inducing factor mitochondria associated 2 [Source:HGNC Symbol;Acc:HGNC:21411]	GO:0003677(DNA binding);GO:0004174(electron-transferring-flavoprotein dehydrogenase activity);GO:0005515(protein binding);GO:0005615(extracellular space);GO:0005634(nucleus);GO:0005737(cytoplasm);GO:0005739(mitochondrion);GO:0005741(mitochondrial outer membrane);GO:0005811(lipid droplet);GO:0005829(cytosol);GO:0005886(plasma membrane);GO:0006743(ubiquinone metabolic process);GO:0008637(apoptotic …	04115(p53 signaling pathway)	NA	hsa-miR-222-5p	8mer	-0.4252	98	146	-13.67
ciRNA2838	chr10	70121899	70123244	-	1	ciRNA	ENST00000373248	AIFM2	mRNA	chr10:70121898-70123244	apoptosis inducing factor mitochondria associated 2 [Source:HGNC Symbol;Acc:HGNC:21411]	GO:0003677(DNA binding);GO:0004174(electron-transferring-flavoprotein dehydrogenase activity);GO:0005515(protein binding);GO:0005615(extracellular space);GO:0005634(nucleus);GO:0005737(cytoplasm);GO:0005739(mitochondrion);GO:0005741(mitochondrial outer membrane);GO:0005811(lipid droplet);GO:0005829(cytosol);GO:0005886(plasma membrane);GO:0006743(ubiquinone metabolic process);GO:0008637(apoptotic …	04115(p53 signaling pathway)	NA	hsa-miR-25-3p	m8	-0.104	58	157	-25.27
ciRNA2838	chr10	70121899	70123244	-	1	ciRNA	ENST00000373248	AIFM2	mRNA	chr10:70121898-70123244	apoptosis inducing factor mitochondria associated 2 [Source:HGNC Symbol;Acc:HGNC:21411]	GO:0003677(DNA binding);GO:0004174(electron-transferring-flavoprotein dehydrogenase activity);GO:0005515(protein binding);GO:0005615(extracellular space);GO:0005634(nucleus);GO:0005737(cytoplasm);GO:0005739(mitochondrion);GO:0005741(mitochondrial outer membrane);GO:0005811(lipid droplet);GO:0005829(cytosol);GO:0005886(plasma membrane);GO:0006743(ubiquinone metabolic process);GO:0008637(apoptotic …	04115(p53 signaling pathway)	NA	hsa-miR-30a-3p	8mer	-0.41325	97	149	-13.27
ciRNA2838	chr10	70121899	70123244	-	1	ciRNA	ENST00000373248	AIFM2	mRNA	chr10:70121898-70123244	apoptosis inducing factor mitochondria associated 2 [Source:HGNC Symbol;Acc:HGNC:21411]	GO:0003677(DNA binding);GO:0004174(electron-transferring-flavoprotein dehydrogenase activity);GO:0005515(protein binding);GO:0005615(extracellular space);GO:0005634(nucleus);GO:0005737(cytoplasm);GO:0005739(mitochondrion);GO:0005741(mitochondrial outer membrane);GO:0005811(lipid droplet);GO:0005829(cytosol);GO:0005886(plasma membrane);GO:0006743(ubiquinone metabolic process);GO:0008637(apoptotic …	04115(p53 signaling pathway)	NA	hsa-miR-30a-5p	m8	-0.2115	81	151	-13.49
ciRNA2838	chr10	70121899	70123244	-	1	ciRNA	ENST00000373248	AIFM2	mRNA	chr10:70121898-70123244	apoptosis inducing factor mitochondria associated 2 [Source:HGNC Symbol;Acc:HGNC:21411]	GO:0003677(DNA binding);GO:0004174(electron-transferring-flavoprotein dehydrogenase activity);GO:0005515(protein binding);GO:0005615(extracellular space);GO:0005634(nucleus);GO:0005737(cytoplasm);GO:0005739(mitochondrion);GO:0005741(mitochondrial outer membrane);GO:0005811(lipid droplet);GO:0005829(cytosol);GO:0005886(plasma membrane);GO:0006743(ubiquinone metabolic process);GO:0008637(apoptotic …	04115(p53 signaling pathway)	NA	hsa-miR-30b-3p	m8	-0.127	79	164	-24.25
ciRNA2838	chr10	70121899	70123244	-	1	ciRNA	ENST00000373248	AIFM2	mRNA	chr10:70121898-70123244	apoptosis inducing factor mitochondria associated 2 [Source:HGNC Symbol;Acc:HGNC:21411]	GO:0003677(DNA binding);GO:0004174(electron-transferring-flavoprotein dehydrogenase activity);GO:0005515(protein binding);GO:0005615(extracellular space);GO:0005634(nucleus);GO:0005737(cytoplasm);GO:0005739(mitochondrion);GO:0005741(mitochondrial outer membrane);GO:0005811(lipid droplet);GO:0005829(cytosol);GO:0005886(plasma membrane);GO:0006743(ubiquinone metabolic process);GO:0008637(apoptotic …	04115(p53 signaling pathway)	NA	hsa-miR-30d-3p	8mer	-0.41325	97	150	-13.94
ciRNA2838	chr10	70121899	70123244	-	1	ciRNA	ENST00000373248	AIFM2	mRNA	chr10:70121898-70123244	apoptosis inducing factor mitochondria associated 2 [Source:HGNC Symbol;Acc:HGNC:21411]	GO:0003677(DNA binding);GO:0004174(electron-transferring-flavoprotein dehydrogenase activity);GO:0005515(protein binding);GO:0005615(extracellular space);GO:0005634(nucleus);GO:0005737(cytoplasm);GO:0005739(mitochondrion);GO:0005741(mitochondrial outer membrane);GO:0005811(lipid droplet);GO:0005829(cytosol);GO:0005886(plasma membrane);GO:0006743(ubiquinone metabolic process);GO:0008637(apoptotic …	04115(p53 signaling pathway)	NA	hsa-miR-30d-5p	m8	-0.2115	81	151	-13.49
ciRNA2838	chr10	70121899	70123244	-	1	ciRNA	ENST00000373248	AIFM2	mRNA	chr10:70121898-70123244	apoptosis inducing factor mitochondria associated 2 [Source:HGNC Symbol;Acc:HGNC:21411]	GO:0003677(DNA binding);GO:0004174(electron-transferring-flavoprotein dehydrogenase activity);GO:0005515(protein binding);GO:0005615(extracellular space);GO:0005634(nucleus);GO:0005737(cytoplasm);GO:0005739(mitochondrion);GO:0005741(mitochondrial outer membrane);GO:0005811(lipid droplet);GO:0005829(cytosol);GO:0005886(plasma membrane);GO:0006743(ubiquinone metabolic process);GO:0008637(apoptotic …	04115(p53 signaling pathway)	NA	hsa-miR-32-5p	m8	-0.104	55	144	-12.53
ciRNA2838	chr10	70121899	70123244	-	1	ciRNA	ENST00000373248	AIFM2	mRNA	chr10:70121898-70123244	apoptosis inducing factor mitochondria associated 2 [Source:HGNC Symbol;Acc:HGNC:21411]	GO:0003677(DNA binding);GO:0004174(electron-transferring-flavoprotein dehydrogenase activity);GO:0005515(protein binding);GO:0005615(extracellular space);GO:0005634(nucleus);GO:0005737(cytoplasm);GO:0005739(mitochondrion);GO:0005741(mitochondrial outer membrane);GO:0005811(lipid droplet);GO:0005829(cytosol);GO:0005886(plasma membrane);GO:0006743(ubiquinone metabolic process);GO:0008637(apoptotic …	04115(p53 signaling pathway)	NA	hsa-miR-92a-2-5p	m8	-0.092	66	140	-16.73
ciRNA2838	chr10	70121899	70123244	-	1	ciRNA	ENST00000373248	AIFM2	mRNA	chr10:70121898-70123244	apoptosis inducing factor mitochondria associated 2 [Source:HGNC Symbol;Acc:HGNC:21411]	GO:0003677(DNA binding);GO:0004174(electron-transferring-flavoprotein dehydrogenase activity);GO:0005515(protein binding);GO:0005615(extracellular space);GO:0005634(nucleus);GO:0005737(cytoplasm);GO:0005739(mitochondrion);GO:0005741(mitochondrial outer membrane);GO:0005811(lipid droplet);GO:0005829(cytosol);GO:0005886(plasma membrane);GO:0006743(ubiquinone metabolic process);GO:0008637(apoptotic …	04115(p53 signaling pathway)	NA	hsa-miR-92a-3p	m8	-0.104	61	155	-26.92
hsa_circ_0017251	chr1	243613671	243695716	-	6	circRNA	ENST00000336199	AKT3	mRNA	chr1:243573048-243613670|chr1:243695716-243843124	AKT serine/threonine kinase 3 [Source:HGNC Symbol;Acc:HGNC:393]	GO:0000002(mitochondrial genome maintenance);GO:0000166(nucleotide binding);GO:0001938(positive regulation of endothelial cell proliferation);GO:0004672(protein kinase activity);GO:0004674(protein serine/threonine kinase activity);GO:0005515(protein binding);GO:0005524(ATP binding);GO:0005634(nucleus);GO:0005737(cytoplasm);GO:0006468(protein phosphorylation);GO:0007165(signal transduction);GO:001…	01521(EGFR tyrosine kinase inhibitor resistance);01522(Endocrine resistance);01524(Platinum drug resistance);04010(MAPK signaling pathway);04012(ErbB signaling pathway);04014(Ras signaling pathway);04015(Rap1 signaling pathway);04022(cGMP-PKG signaling pathway);04024(cAMP signaling pathway);04062(Chemokine signaling pathway);04066(HIF-1 signaling pathway);04068(FoxO signaling pathway);04071(Sphin…	EC:2.7.11.1	hsa-miR-106a-3p	1a	-0.2105	85	148	-14.53
hsa_circ_0017251	chr1	243613671	243695716	-	6	circRNA	ENST00000336199	AKT3	mRNA	chr1:243573048-243613670|chr1:243695716-243843124	AKT serine/threonine kinase 3 [Source:HGNC Symbol;Acc:HGNC:393]	GO:0000002(mitochondrial genome maintenance);GO:0000166(nucleotide binding);GO:0001938(positive regulation of endothelial cell proliferation);GO:0004672(protein kinase activity);GO:0004674(protein serine/threonine kinase activity);GO:0005515(protein binding);GO:0005524(ATP binding);GO:0005634(nucleus);GO:0005737(cytoplasm);GO:0006468(protein phosphorylation);GO:0007165(signal transduction);GO:001…	01521(EGFR tyrosine kinase inhibitor resistance);01522(Endocrine resistance);01524(Platinum drug resistance);04010(MAPK signaling pathway);04012(ErbB signaling pathway);04014(Ras signaling pathway);04015(Rap1 signaling pathway);04022(cGMP-PKG signaling pathway);04024(cAMP signaling pathway);04062(Chemokine signaling pathway);04066(HIF-1 signaling pathway);04068(FoxO signaling pathway);04071(Sphin…	EC:2.7.11.1	hsa-miR-106a-5p	m8	-0.188	84	152	-18.7
hsa_circ_0000199	chr1	243545510	243573048	-	4	circRNA	ENST00000336199	AKT3	mRNA	chr1:243512426-243545509|chr1:243573048-243613670	AKT serine/threonine kinase 3 [Source:HGNC Symbol;Acc:HGNC:393]	GO:0000002(mitochondrial genome maintenance);GO:0000166(nucleotide binding);GO:0001938(positive regulation of endothelial cell proliferation);GO:0004672(protein kinase activity);GO:0004674(protein serine/threonine kinase activity);GO:0005515(protein binding);GO:0005524(ATP binding);GO:0005634(nucleus);GO:0005737(cytoplasm);GO:0006468(protein phosphorylation);GO:0007165(signal transduction);GO:001…	01521(EGFR tyrosine kinase inhibitor resistance);01522(Endocrine resistance);01524(Platinum drug resistance);04010(MAPK signaling pathway);04012(ErbB signaling pathway);04014(Ras signaling pathway);04015(Rap1 signaling pathway);04022(cGMP-PKG signaling pathway);04024(cAMP signaling pathway);04062(Chemokine signaling pathway);04066(HIF-1 signaling pathway);04068(FoxO signaling pathway);04071(Sphin…	EC:2.7.11.1	hsa-miR-122-5p	1a	-0.12785	80	143	-22.84
hsa_circ_0000199	chr1	243545510	243573048	-	4	circRNA	ENST00000336199	AKT3	mRNA	chr1:243512426-243545509|chr1:243573048-243613670	AKT serine/threonine kinase 3 [Source:HGNC Symbol;Acc:HGNC:393]	GO:0000002(mitochondrial genome maintenance);GO:0000166(nucleotide binding);GO:0001938(positive regulation of endothelial cell proliferation);GO:0004672(protein kinase activity);GO:0004674(protein serine/threonine kinase activity);GO:0005515(protein binding);GO:0005524(ATP binding);GO:0005634(nucleus);GO:0005737(cytoplasm);GO:0006468(protein phosphorylation);GO:0007165(signal transduction);GO:001…	01521(EGFR tyrosine kinase inhibitor resistance);01522(Endocrine resistance);01524(Platinum drug resistance);04010(MAPK signaling pathway);04012(ErbB signaling pathway);04014(Ras signaling pathway);04015(Rap1 signaling pathway);04022(cGMP-PKG signaling pathway);04024(cAMP signaling pathway);04062(Chemokine signaling pathway);04066(HIF-1 signaling pathway);04068(FoxO signaling pathway);04071(Sphin…	EC:2.7.11.1	hsa-miR-1-3p	m8	-0.236	87	150	-14.5
hsa_circ_0017251	chr1	243613671	243695716	-	6	circRNA	ENST00000336199	AKT3	mRNA	chr1:243573048-243613670|chr1:243695716-243843124	AKT serine/threonine kinase 3 [Source:HGNC Symbol;Acc:HGNC:393]	GO:0000002(mitochondrial genome maintenance);GO:0000166(nucleotide binding);GO:0001938(positive regulation of endothelial cell proliferation);GO:0004672(protein kinase activity);GO:0004674(protein serine/threonine kinase activity);GO:0005515(protein binding);GO:0005524(ATP binding);GO:0005634(nucleus);GO:0005737(cytoplasm);GO:0006468(protein phosphorylation);GO:0007165(signal transduction);GO:001…	01521(EGFR tyrosine kinase inhibitor resistance);01522(Endocrine resistance);01524(Platinum drug resistance);04010(MAPK signaling pathway);04012(ErbB signaling pathway);04014(Ras signaling pathway);04015(Rap1 signaling pathway);04022(cGMP-PKG signaling pathway);04024(cAMP signaling pathway);04062(Chemokine signaling pathway);04066(HIF-1 signaling pathway);04068(FoxO signaling pathway);04071(Sphin…	EC:2.7.11.1	hsa-miR-17-3p	8mer	-0.2582	92	140	-19.39
hsa_circ_0017251	chr1	243613671	243695716	-	6	circRNA	ENST00000336199	AKT3	mRNA	chr1:243573048-243613670|chr1:243695716-243843124	AKT serine/threonine kinase 3 [Source:HGNC Symbol;Acc:HGNC:393]	GO:0000002(mitochondrial genome maintenance);GO:0000166(nucleotide binding);GO:0001938(positive regulation of endothelial cell proliferation);GO:0004672(protein kinase activity);GO:0004674(protein serine/threonine kinase activity);GO:0005515(protein binding);GO:0005524(ATP binding);GO:0005634(nucleus);GO:0005737(cytoplasm);GO:0006468(protein phosphorylation);GO:0007165(signal transduction);GO:001…	01521(EGFR tyrosine kinase inhibitor resistance);01522(Endocrine resistance);01524(Platinum drug resistance);04010(MAPK signaling pathway);04012(ErbB signaling pathway);04014(Ras signaling pathway);04015(Rap1 signaling pathway);04022(cGMP-PKG signaling pathway);04024(cAMP signaling pathway);04062(Chemokine signaling pathway);04066(HIF-1 signaling pathway);04068(FoxO signaling pathway);04071(Sphin…	EC:2.7.11.1	hsa-miR-17-5p	m8	-0.188	84	152	-17.07
hsa_circ_0017251	chr1	243613671	243695716	-	6	circRNA	ENST00000336199	AKT3	mRNA	chr1:243573048-243613670|chr1:243695716-243843124	AKT serine/threonine kinase 3 [Source:HGNC Symbol;Acc:HGNC:393]	GO:0000002(mitochondrial genome maintenance);GO:0000166(nucleotide binding);GO:0001938(positive regulation of endothelial cell proliferation);GO:0004672(protein kinase activity);GO:0004674(protein serine/threonine kinase activity);GO:0005515(protein binding);GO:0005524(ATP binding);GO:0005634(nucleus);GO:0005737(cytoplasm);GO:0006468(protein phosphorylation);GO:0007165(signal transduction);GO:001…	01521(EGFR tyrosine kinase inhibitor resistance);01522(Endocrine resistance);01524(Platinum drug resistance);04010(MAPK signaling pathway);04012(ErbB signaling pathway);04014(Ras signaling pathway);04015(Rap1 signaling pathway);04022(cGMP-PKG signaling pathway);04024(cAMP signaling pathway);04062(Chemokine signaling pathway);04066(HIF-1 signaling pathway);04068(FoxO signaling pathway);04071(Sphin…	EC:2.7.11.1	hsa-miR-181a-2-3p	1a	-0.15875	71	145	-15.93
hsa_circ_0000199	chr1	243545510	243573048	-	4	circRNA	ENST00000336199	AKT3	mRNA	chr1:243512426-243545509|chr1:243573048-243613670	AKT serine/threonine kinase 3 [Source:HGNC Symbol;Acc:HGNC:393]	GO:0000002(mitochondrial genome maintenance);GO:0000166(nucleotide binding);GO:0001938(positive regulation of endothelial cell proliferation);GO:0004672(protein kinase activity);GO:0004674(protein serine/threonine kinase activity);GO:0005515(protein binding);GO:0005524(ATP binding);GO:0005634(nucleus);GO:0005737(cytoplasm);GO:0006468(protein phosphorylation);GO:0007165(signal transduction);GO:001…	01521(EGFR tyrosine kinase inhibitor resistance);01522(Endocrine resistance);01524(Platinum drug resistance);04010(MAPK signaling pathway);04012(ErbB signaling pathway);04014(Ras signaling pathway);04015(Rap1 signaling pathway);04022(cGMP-PKG signaling pathway);04024(cAMP signaling pathway);04062(Chemokine signaling pathway);04066(HIF-1 signaling pathway);04068(FoxO signaling pathway);04071(Sphin…	EC:2.7.11.1	hsa-miR-198	1a	-0.2254	87	147	-23.22
hsa_circ_0017251	chr1	243613671	243695716	-	6	circRNA	ENST00000336199	AKT3	mRNA	chr1:243573048-243613670|chr1:243695716-243843124	AKT serine/threonine kinase 3 [Source:HGNC Symbol;Acc:HGNC:393]	GO:0000002(mitochondrial genome maintenance);GO:0000166(nucleotide binding);GO:0001938(positive regulation of endothelial cell proliferation);GO:0004672(protein kinase activity);GO:0004674(protein serine/threonine kinase activity);GO:0005515(protein binding);GO:0005524(ATP binding);GO:0005634(nucleus);GO:0005737(cytoplasm);GO:0006468(protein phosphorylation);GO:0007165(signal transduction);GO:001…	01521(EGFR tyrosine kinase inhibitor resistance);01522(Endocrine resistance);01524(Platinum drug resistance);04010(MAPK signaling pathway);04012(ErbB signaling pathway);04014(Ras signaling pathway);04015(Rap1 signaling pathway);04022(cGMP-PKG signaling pathway);04024(cAMP signaling pathway);04062(Chemokine signaling pathway);04066(HIF-1 signaling pathway);04068(FoxO signaling pathway);04071(Sphin…	EC:2.7.11.1	hsa-miR-199a-3p	m8	-0.2125	84	154	-22.58
hsa_circ_0017251	chr1	243613671	243695716	-	6	circRNA	ENST00000336199	AKT3	mRNA	chr1:243573048-243613670|chr1:243695716-243843124	AKT serine/threonine kinase 3 [Source:HGNC Symbol;Acc:HGNC:393]	GO:0000002(mitochondrial genome maintenance);GO:0000166(nucleotide binding);GO:0001938(positive regulation of endothelial cell proliferation);GO:0004672(protein kinase activity);GO:0004674(protein serine/threonine kinase activity);GO:0005515(protein binding);GO:0005524(ATP binding);GO:0005634(nucleus);GO:0005737(cytoplasm);GO:0006468(protein phosphorylation);GO:0007165(signal transduction);GO:001…	01521(EGFR tyrosine kinase inhibitor resistance);01522(Endocrine resistance);01524(Platinum drug resistance);04010(MAPK signaling pathway);04012(ErbB signaling pathway);04014(Ras signaling pathway);04015(Rap1 signaling pathway);04022(cGMP-PKG signaling pathway);04024(cAMP signaling pathway);04062(Chemokine signaling pathway);04066(HIF-1 signaling pathway);04068(FoxO signaling pathway);04071(Sphin…	EC:2.7.11.1	hsa-miR-199b-3p	m8	-0.2125	84	154	-22.58
hsa_circ_0017251	chr1	243613671	243695716	-	6	circRNA	ENST00000336199	AKT3	mRNA	chr1:243573048-243613670|chr1:243695716-243843124	AKT serine/threonine kinase 3 [Source:HGNC Symbol;Acc:HGNC:393]	GO:0000002(mitochondrial genome maintenance);GO:0000166(nucleotide binding);GO:0001938(positive regulation of endothelial cell proliferation);GO:0004672(protein kinase activity);GO:0004674(protein serine/threonine kinase activity);GO:0005515(protein binding);GO:0005524(ATP binding);GO:0005634(nucleus);GO:0005737(cytoplasm);GO:0006468(protein phosphorylation);GO:0007165(signal transduction);GO:001…	01521(EGFR tyrosine kinase inhibitor resistance);01522(Endocrine resistance);01524(Platinum drug resistance);04010(MAPK signaling pathway);04012(ErbB signaling pathway);04014(Ras signaling pathway);04015(Rap1 signaling pathway);04022(cGMP-PKG signaling pathway);04024(cAMP signaling pathway);04062(Chemokine signaling pathway);04066(HIF-1 signaling pathway);04068(FoxO signaling pathway);04071(Sphin…	EC:2.7.11.1	hsa-miR-203a-3p	m8	-0.204	84	151	-11.06
hsa_circ_0017251	chr1	243613671	243695716	-	6	circRNA	ENST00000336199	AKT3	mRNA	chr1:243573048-243613670|chr1:243695716-243843124	AKT serine/threonine kinase 3 [Source:HGNC Symbol;Acc:HGNC:393]	GO:0000002(mitochondrial genome maintenance);GO:0000166(nucleotide binding);GO:0001938(positive regulation of endothelial cell proliferation);GO:0004672(protein kinase activity);GO:0004674(protein serine/threonine kinase activity);GO:0005515(protein binding);GO:0005524(ATP binding);GO:0005634(nucleus);GO:0005737(cytoplasm);GO:0006468(protein phosphorylation);GO:0007165(signal transduction);GO:001…	01521(EGFR tyrosine kinase inhibitor resistance);01522(Endocrine resistance);01524(Platinum drug resistance);04010(MAPK signaling pathway);04012(ErbB signaling pathway);04014(Ras signaling pathway);04015(Rap1 signaling pathway);04022(cGMP-PKG signaling pathway);04024(cAMP signaling pathway);04062(Chemokine signaling pathway);04066(HIF-1 signaling pathway);04068(FoxO signaling pathway);04071(Sphin…	EC:2.7.11.1	hsa-miR-204-5p	8mer	-0.2732	90	145	-19.67
hsa_circ_0017251	chr1	243613671	243695716	-	6	circRNA	ENST00000336199	AKT3	mRNA	chr1:243573048-243613670|chr1:243695716-243843124	AKT serine/threonine kinase 3 [Source:HGNC Symbol;Acc:HGNC:393]	GO:0000002(mitochondrial genome maintenance);GO:0000166(nucleotide binding);GO:0001938(positive regulation of endothelial cell proliferation);GO:0004672(protein kinase activity);GO:0004674(protein serine/threonine kinase activity);GO:0005515(protein binding);GO:0005524(ATP binding);GO:0005634(nucleus);GO:0005737(cytoplasm);GO:0006468(protein phosphorylation);GO:0007165(signal transduction);GO:001…	01521(EGFR tyrosine kinase inhibitor resistance);01522(Endocrine resistance);01524(Platinum drug resistance);04010(MAPK signaling pathway);04012(ErbB signaling pathway);04014(Ras signaling pathway);04015(Rap1 signaling pathway);04022(cGMP-PKG signaling pathway);04024(cAMP signaling pathway);04062(Chemokine signaling pathway);04066(HIF-1 signaling pathway);04068(FoxO signaling pathway);04071(Sphin…	EC:2.7.11.1	hsa-miR-205-3p	1a	-0.1312	58	142	-17.48
hsa_circ_0017251	chr1	243613671	243695716	-	6	circRNA	ENST00000336199	AKT3	mRNA	chr1:243573048-243613670|chr1:243695716-243843124	AKT serine/threonine kinase 3 [Source:HGNC Symbol;Acc:HGNC:393]	GO:0000002(mitochondrial genome maintenance);GO:0000166(nucleotide binding);GO:0001938(positive regulation of endothelial cell proliferation);GO:0004672(protein kinase activity);GO:0004674(protein serine/threonine kinase activity);GO:0005515(protein binding);GO:0005524(ATP binding);GO:0005634(nucleus);GO:0005737(cytoplasm);GO:0006468(protein phosphorylation);GO:0007165(signal transduction);GO:001…	01521(EGFR tyrosine kinase inhibitor resistance);01522(Endocrine resistance);01524(Platinum drug resistance);04010(MAPK signaling pathway);04012(ErbB signaling pathway);04014(Ras signaling pathway);04015(Rap1 signaling pathway);04022(cGMP-PKG signaling pathway);04024(cAMP signaling pathway);04062(Chemokine signaling pathway);04066(HIF-1 signaling pathway);04068(FoxO signaling pathway);04071(Sphin…	EC:2.7.11.1	hsa-miR-20a-5p	m8	-0.2035	86	153	-17.97
hsa_circ_0017251	chr1	243613671	243695716	-	6	circRNA	ENST00000336199	AKT3	mRNA	chr1:243573048-243613670|chr1:243695716-243843124	AKT serine/threonine kinase 3 [Source:HGNC Symbol;Acc:HGNC:393]	GO:0000002(mitochondrial genome maintenance);GO:0000166(nucleotide binding);GO:0001938(positive regulation of endothelial cell proliferation);GO:0004672(protein kinase activity);GO:0004674(protein serine/threonine kinase activity);GO:0005515(protein binding);GO:0005524(ATP binding);GO:0005634(nucleus);GO:0005737(cytoplasm);GO:0006468(protein phosphorylation);GO:0007165(signal transduction);GO:001…	01521(EGFR tyrosine kinase inhibitor resistance);01522(Endocrine resistance);01524(Platinum drug resistance);04010(MAPK signaling pathway);04012(ErbB signaling pathway);04014(Ras signaling pathway);04015(Rap1 signaling pathway);04022(cGMP-PKG signaling pathway);04024(cAMP signaling pathway);04062(Chemokine signaling pathway);04066(HIF-1 signaling pathway);04068(FoxO signaling pathway);04071(Sphin…	EC:2.7.11.1	hsa-miR-211-5p	8mer	-0.2732	90	140	-13.71
hsa_circ_0017251	chr1	243613671	243695716	-	6	circRNA	ENST00000336199	AKT3	mRNA	chr1:243573048-243613670|chr1:243695716-243843124	AKT serine/threonine kinase 3 [Source:HGNC Symbol;Acc:HGNC:393]	GO:0000002(mitochondrial genome maintenance);GO:0000166(nucleotide binding);GO:0001938(positive regulation of endothelial cell proliferation);GO:0004672(protein kinase activity);GO:0004674(protein serine/threonine kinase activity);GO:0005515(protein binding);GO:0005524(ATP binding);GO:0005634(nucleus);GO:0005737(cytoplasm);GO:0006468(protein phosphorylation);GO:0007165(signal transduction);GO:001…	01521(EGFR tyrosine kinase inhibitor resistance);01522(Endocrine resistance);01524(Platinum drug resistance);04010(MAPK signaling pathway);04012(ErbB signaling pathway);04014(Ras signaling pathway);04015(Rap1 signaling pathway);04022(cGMP-PKG signaling pathway);04024(cAMP signaling pathway);04062(Chemokine signaling pathway);04066(HIF-1 signaling pathway);04068(FoxO signaling pathway);04071(Sphin…	EC:2.7.11.1	hsa-miR-30a-3p	m8	-0.237	85	166	-21.31
hsa_circ_0017251	chr1	243613671	243695716	-	6	circRNA	ENST00000336199	AKT3	mRNA	chr1:243573048-243613670|chr1:243695716-243843124	AKT serine/threonine kinase 3 [Source:HGNC Symbol;Acc:HGNC:393]	GO:0000002(mitochondrial genome maintenance);GO:0000166(nucleotide binding);GO:0001938(positive regulation of endothelial cell proliferation);GO:0004672(protein kinase activity);GO:0004674(protein serine/threonine kinase activity);GO:0005515(protein binding);GO:0005524(ATP binding);GO:0005634(nucleus);GO:0005737(cytoplasm);GO:0006468(protein phosphorylation);GO:0007165(signal transduction);GO:001…	01521(EGFR tyrosine kinase inhibitor resistance);01522(Endocrine resistance);01524(Platinum drug resistance);04010(MAPK signaling pathway);04012(ErbB signaling pathway);04014(Ras signaling pathway);04015(Rap1 signaling pathway);04022(cGMP-PKG signaling pathway);04024(cAMP signaling pathway);04062(Chemokine signaling pathway);04066(HIF-1 signaling pathway);04068(FoxO signaling pathway);04071(Sphin…	EC:2.7.11.1	hsa-miR-30d-3p	m8	-0.237	85	171	-22.28
hsa_circ_0017251	chr1	243613671	243695716	-	6	circRNA	ENST00000336199	AKT3	mRNA	chr1:243573048-243613670|chr1:243695716-243843124	AKT serine/threonine kinase 3 [Source:HGNC Symbol;Acc:HGNC:393]	GO:0000002(mitochondrial genome maintenance);GO:0000166(nucleotide binding);GO:0001938(positive regulation of endothelial cell proliferation);GO:0004672(protein kinase activity);GO:0004674(protein serine/threonine kinase activity);GO:0005515(protein binding);GO:0005524(ATP binding);GO:0005634(nucleus);GO:0005737(cytoplasm);GO:0006468(protein phosphorylation);GO:0007165(signal transduction);GO:001…	01521(EGFR tyrosine kinase inhibitor resistance);01522(Endocrine resistance);01524(Platinum drug resistance);04010(MAPK signaling pathway);04012(ErbB signaling pathway);04014(Ras signaling pathway);04015(Rap1 signaling pathway);04022(cGMP-PKG signaling pathway);04024(cAMP signaling pathway);04062(Chemokine signaling pathway);04066(HIF-1 signaling pathway);04068(FoxO signaling pathway);04071(Sphin…	EC:2.7.11.1	hsa-miR-93-5p	m8	-0.188	85	152	-16.22
circRNA26651	chr18	9182383	9239556	+	7	circRNA	ENST00000400020	ANKRD12	mRNA	chr18:9137873-9182382|chr18:9258931-9263790	ankyrin repeat domain 12 [Source:HGNC Symbol;Acc:HGNC:29135]	GO:0005515(protein binding);GO:0005634(nucleus);GO:0005654(nucleoplasm);GO:0005829(cytosol)	NA	NA	hsa-let-7a-2-3p	m8	-0.2315	88	148	-13.79
circRNA26651	chr18	9182383	9239556	+	7	circRNA	ENST00000400020	ANKRD12	mRNA	chr18:9137873-9182382|chr18:9258931-9263790	ankyrin repeat domain 12 [Source:HGNC Symbol;Acc:HGNC:29135]	GO:0005515(protein binding);GO:0005634(nucleus);GO:0005654(nucleoplasm);GO:0005829(cytosol)	NA	NA	hsa-miR-103a-1-5p	8mer	-0.24355	84	167	-21.56
circRNA26651	chr18	9182383	9239556	+	7	circRNA	ENST00000400020	ANKRD12	mRNA	chr18:9137873-9182382|chr18:9258931-9263790	ankyrin repeat domain 12 [Source:HGNC Symbol;Acc:HGNC:29135]	GO:0005515(protein binding);GO:0005634(nucleus);GO:0005654(nucleoplasm);GO:0005829(cytosol)	NA	NA	hsa-miR-103a-2-5p	8mer	-0.24355	84	167	-20.25
circRNA26651	chr18	9182383	9239556	+	7	circRNA	ENST00000400020	ANKRD12	mRNA	chr18:9137873-9182382|chr18:9258931-9263790	ankyrin repeat domain 12 [Source:HGNC Symbol;Acc:HGNC:29135]	GO:0005515(protein binding);GO:0005634(nucleus);GO:0005654(nucleoplasm);GO:0005829(cytosol)	NA	NA	hsa-miR-10b-3p	8mer	-0.2252	82	144	-11.1
circRNA26651	chr18	9182383	9239556	+	7	circRNA	ENST00000400020	ANKRD12	mRNA	chr18:9137873-9182382|chr18:9258931-9263790	ankyrin repeat domain 12 [Source:HGNC Symbol;Acc:HGNC:29135]	GO:0005515(protein binding);GO:0005634(nucleus);GO:0005654(nucleoplasm);GO:0005829(cytosol)	NA	NA	hsa-miR-122-5p	1a	-0.0982	73	146	-16.65
circRNA26651	chr18	9182383	9239556	+	7	circRNA	ENST00000400020	ANKRD12	mRNA	chr18:9137873-9182382|chr18:9258931-9263790	ankyrin repeat domain 12 [Source:HGNC Symbol;Acc:HGNC:29135]	GO:0005515(protein binding);GO:0005634(nucleus);GO:0005654(nucleoplasm);GO:0005829(cytosol)	NA	NA	hsa-miR-124-5p	8mer	-0.1472	68	154	-16.27
circRNA26651	chr18	9182383	9239556	+	7	circRNA	ENST00000400020	ANKRD12	mRNA	chr18:9137873-9182382|chr18:9258931-9263790	ankyrin repeat domain 12 [Source:HGNC Symbol;Acc:HGNC:29135]	GO:0005515(protein binding);GO:0005634(nucleus);GO:0005654(nucleoplasm);GO:0005829(cytosol)	NA	NA	hsa-miR-129-5p	m8	-0.133	69	150	-12.84
circRNA26651	chr18	9182383	9239556	+	7	circRNA	ENST00000400020	ANKRD12	mRNA	chr18:9137873-9182382|chr18:9258931-9263790	ankyrin repeat domain 12 [Source:HGNC Symbol;Acc:HGNC:29135]	GO:0005515(protein binding);GO:0005634(nucleus);GO:0005654(nucleoplasm);GO:0005829(cytosol)	NA	NA	hsa-miR-130a-5p	8mer	-0.2601	87	165	-20.06
circRNA26651	chr18	9182383	9239556	+	7	circRNA	ENST00000400020	ANKRD12	mRNA	chr18:9137873-9182382|chr18:9258931-9263790	ankyrin repeat domain 12 [Source:HGNC Symbol;Acc:HGNC:29135]	GO:0005515(protein binding);GO:0005634(nucleus);GO:0005654(nucleoplasm);GO:0005829(cytosol)	NA	NA	hsa-miR-135a-5p	1a	-0.1512	62	140	-11.24
circRNA26651	chr18	9182383	9239556	+	7	circRNA	ENST00000400020	ANKRD12	mRNA	chr18:9137873-9182382|chr18:9258931-9263790	ankyrin repeat domain 12 [Source:HGNC Symbol;Acc:HGNC:29135]	GO:0005515(protein binding);GO:0005634(nucleus);GO:0005654(nucleoplasm);GO:0005829(cytosol)	NA	NA	hsa-miR-137-5p	8mer	-0.1322	61	161	-20.21
circRNA26651	chr18	9182383	9239556	+	7	circRNA	ENST00000400020	ANKRD12	mRNA	chr18:9137873-9182382|chr18:9258931-9263790	ankyrin repeat domain 12 [Source:HGNC Symbol;Acc:HGNC:29135]	GO:0005515(protein binding);GO:0005634(nucleus);GO:0005654(nucleoplasm);GO:0005829(cytosol)	NA	NA	hsa-miR-1-3p	8mer	-0.2192	85	151	-15.84
circRNA26651	chr18	9182383	9239556	+	7	circRNA	ENST00000400020	ANKRD12	mRNA	chr18:9137873-9182382|chr18:9258931-9263790	ankyrin repeat domain 12 [Source:HGNC Symbol;Acc:HGNC:29135]	GO:0005515(protein binding);GO:0005634(nucleus);GO:0005654(nucleoplasm);GO:0005829(cytosol)	NA	NA	hsa-miR-148a-5p	8mer	-0.2331	84	154	-13.17
circRNA26651	chr18	9182383	9239556	+	7	circRNA	ENST00000400020	ANKRD12	mRNA	chr18:9137873-9182382|chr18:9258931-9263790	ankyrin repeat domain 12 [Source:HGNC Symbol;Acc:HGNC:29135]	GO:0005515(protein binding);GO:0005634(nucleus);GO:0005654(nucleoplasm);GO:0005829(cytosol)	NA	NA	hsa-miR-15a-5p	1a	-0.1302	55	147	-18.4
circRNA26651	chr18	9182383	9239556	+	7	circRNA	ENST00000400020	ANKRD12	mRNA	chr18:9137873-9182382|chr18:9258931-9263790	ankyrin repeat domain 12 [Source:HGNC Symbol;Acc:HGNC:29135]	GO:0005515(protein binding);GO:0005634(nucleus);GO:0005654(nucleoplasm);GO:0005829(cytosol)	NA	NA	hsa-miR-15b-5p	1a	-0.14075	60	146	-22.96
circRNA26651	chr18	9182383	9239556	+	7	circRNA	ENST00000400020	ANKRD12	mRNA	chr18:9137873-9182382|chr18:9258931-9263790	ankyrin repeat domain 12 [Source:HGNC Symbol;Acc:HGNC:29135]	GO:0005515(protein binding);GO:0005634(nucleus);GO:0005654(nucleoplasm);GO:0005829(cytosol)	NA	NA	hsa-miR-16-1-3p	1a	-0.1502	61	162	-19.1
circRNA26651	chr18	9182383	9239556	+	7	circRNA	ENST00000400020	ANKRD12	mRNA	chr18:9137873-9182382|chr18:9258931-9263790	ankyrin repeat domain 12 [Source:HGNC Symbol;Acc:HGNC:29135]	GO:0005515(protein binding);GO:0005634(nucleus);GO:0005654(nucleoplasm);GO:0005829(cytosol)	NA	NA	hsa-miR-16-5p	1a	-0.1513	64	151	-17.94
circRNA26651	chr18	9182383	9239556	+	7	circRNA	ENST00000400020	ANKRD12	mRNA	chr18:9137873-9182382|chr18:9258931-9263790	ankyrin repeat domain 12 [Source:HGNC Symbol;Acc:HGNC:29135]	GO:0005515(protein binding);GO:0005634(nucleus);GO:0005654(nucleoplasm);GO:0005829(cytosol)	NA	NA	hsa-miR-17-3p	8mer	-0.1745	80	148	-21.5
circRNA26651	chr18	9182383	9239556	+	7	circRNA	ENST00000400020	ANKRD12	mRNA	chr18:9137873-9182382|chr18:9258931-9263790	ankyrin repeat domain 12 [Source:HGNC Symbol;Acc:HGNC:29135]	GO:0005515(protein binding);GO:0005634(nucleus);GO:0005654(nucleoplasm);GO:0005829(cytosol)	NA	NA	hsa-miR-181a-5p	m8	-0.16	68	149	-13.56
circRNA26651	chr18	9182383	9239556	+	7	circRNA	ENST00000400020	ANKRD12	mRNA	chr18:9137873-9182382|chr18:9258931-9263790	ankyrin repeat domain 12 [Source:HGNC Symbol;Acc:HGNC:29135]	GO:0005515(protein binding);GO:0005634(nucleus);GO:0005654(nucleoplasm);GO:0005829(cytosol)	NA	NA	hsa-miR-181b-5p	m8	-0.16	68	152	-13.75
circRNA26651	chr18	9182383	9239556	+	7	circRNA	ENST00000400020	ANKRD12	mRNA	chr18:9137873-9182382|chr18:9258931-9263790	ankyrin repeat domain 12 [Source:HGNC Symbol;Acc:HGNC:29135]	GO:0005515(protein binding);GO:0005634(nucleus);GO:0005654(nucleoplasm);GO:0005829(cytosol)	NA	NA	hsa-miR-181c-5p	m8	-0.1445	63	151	-12.96
circRNA26651	chr18	9182383	9239556	+	7	circRNA	ENST00000400020	ANKRD12	mRNA	chr18:9137873-9182382|chr18:9258931-9263790	ankyrin repeat domain 12 [Source:HGNC Symbol;Acc:HGNC:29135]	GO:0005515(protein binding);GO:0005634(nucleus);GO:0005654(nucleoplasm);GO:0005829(cytosol)	NA	NA	hsa-miR-182-5p	8mer	-0.1892	74	159	-16.15
circRNA26651	chr18	9182383	9239556	+	7	circRNA	ENST00000400020	ANKRD12	mRNA	chr18:9137873-9182382|chr18:9258931-9263790	ankyrin repeat domain 12 [Source:HGNC Symbol;Acc:HGNC:29135]	GO:0005515(protein binding);GO:0005634(nucleus);GO:0005654(nucleoplasm);GO:0005829(cytosol)	NA	NA	hsa-miR-183-5p	m8	-0.105	50	153	-16.2
circRNA26651	chr18	9182383	9239556	+	7	circRNA	ENST00000400020	ANKRD12	mRNA	chr18:9137873-9182382|chr18:9258931-9263790	ankyrin repeat domain 12 [Source:HGNC Symbol;Acc:HGNC:29135]	GO:0005515(protein binding);GO:0005634(nucleus);GO:0005654(nucleoplasm);GO:0005829(cytosol)	NA	NA	hsa-miR-197-3p	8mer	-0.3242	96	152	-14.33
circRNA26651	chr18	9182383	9239556	+	7	circRNA	ENST00000400020	ANKRD12	mRNA	chr18:9137873-9182382|chr18:9258931-9263790	ankyrin repeat domain 12 [Source:HGNC Symbol;Acc:HGNC:29135]	GO:0005515(protein binding);GO:0005634(nucleus);GO:0005654(nucleoplasm);GO:0005829(cytosol)	NA	NA	hsa-miR-197-5p	8mer	-0.1893	80	149	-16.04
circRNA26651	chr18	9182383	9239556	+	7	circRNA	ENST00000400020	ANKRD12	mRNA	chr18:9137873-9182382|chr18:9258931-9263790	ankyrin repeat domain 12 [Source:HGNC Symbol;Acc:HGNC:29135]	GO:0005515(protein binding);GO:0005634(nucleus);GO:0005654(nucleoplasm);GO:0005829(cytosol)	NA	NA	hsa-miR-19a-5p	1a	-0.1583	70	153	-14.38
circRNA26651	chr18	9182383	9239556	+	7	circRNA	ENST00000400020	ANKRD12	mRNA	chr18:9137873-9182382|chr18:9258931-9263790	ankyrin repeat domain 12 [Source:HGNC Symbol;Acc:HGNC:29135]	GO:0005515(protein binding);GO:0005634(nucleus);GO:0005654(nucleoplasm);GO:0005829(cytosol)	NA	NA	hsa-miR-19b-1-5p	1a	-0.1583	69	152	-15.5
circRNA26651	chr18	9182383	9239556	+	7	circRNA	ENST00000400020	ANKRD12	mRNA	chr18:9137873-9182382|chr18:9258931-9263790	ankyrin repeat domain 12 [Source:HGNC Symbol;Acc:HGNC:29135]	GO:0005515(protein binding);GO:0005634(nucleus);GO:0005654(nucleoplasm);GO:0005829(cytosol)	NA	NA	hsa-miR-19b-2-5p	1a	-0.1583	69	155	-17.23
circRNA26651	chr18	9182383	9239556	+	7	circRNA	ENST00000400020	ANKRD12	mRNA	chr18:9137873-9182382|chr18:9258931-9263790	ankyrin repeat domain 12 [Source:HGNC Symbol;Acc:HGNC:29135]	GO:0005515(protein binding);GO:0005634(nucleus);GO:0005654(nucleoplasm);GO:0005829(cytosol)	NA	NA	hsa-miR-203a-3p	8mer	-0.22025	88	151	-14.57
circRNA26651	chr18	9182383	9239556	+	7	circRNA	ENST00000400020	ANKRD12	mRNA	chr18:9137873-9182382|chr18:9258931-9263790	ankyrin repeat domain 12 [Source:HGNC Symbol;Acc:HGNC:29135]	GO:0005515(protein binding);GO:0005634(nucleus);GO:0005654(nucleoplasm);GO:0005829(cytosol)	NA	NA	hsa-miR-204-3p	m8	-0.142	71	145	-22.16
circRNA26651	chr18	9182383	9239556	+	7	circRNA	ENST00000400020	ANKRD12	mRNA	chr18:9137873-9182382|chr18:9258931-9263790	ankyrin repeat domain 12 [Source:HGNC Symbol;Acc:HGNC:29135]	GO:0005515(protein binding);GO:0005634(nucleus);GO:0005654(nucleoplasm);GO:0005829(cytosol)	NA	NA	hsa-miR-20a-3p	m8	-0.157	65	154	-14.75
circRNA26651	chr18	9182383	9239556	+	7	circRNA	ENST00000400020	ANKRD12	mRNA	chr18:9137873-9182382|chr18:9258931-9263790	ankyrin repeat domain 12 [Source:HGNC Symbol;Acc:HGNC:29135]	GO:0005515(protein binding);GO:0005634(nucleus);GO:0005654(nucleoplasm);GO:0005829(cytosol)	NA	NA	hsa-miR-215-3p	m8	-0.129	61	157	-14.44
circRNA26651	chr18	9182383	9239556	+	7	circRNA	ENST00000400020	ANKRD12	mRNA	chr18:9137873-9182382|chr18:9258931-9263790	ankyrin repeat domain 12 [Source:HGNC Symbol;Acc:HGNC:29135]	GO:0005515(protein binding);GO:0005634(nucleus);GO:0005654(nucleoplasm);GO:0005829(cytosol)	NA	NA	hsa-miR-215-5p	m8	-0.117	65	148	-12.18
circRNA26651	chr18	9182383	9239556	+	7	circRNA	ENST00000400020	ANKRD12	mRNA	chr18:9137873-9182382|chr18:9258931-9263790	ankyrin repeat domain 12 [Source:HGNC Symbol;Acc:HGNC:29135]	GO:0005515(protein binding);GO:0005634(nucleus);GO:0005654(nucleoplasm);GO:0005829(cytosol)	NA	NA	hsa-miR-216a-5p	m8	-0.17	74	153	-13.05
circRNA26651	chr18	9182383	9239556	+	7	circRNA	ENST00000400020	ANKRD12	mRNA	chr18:9137873-9182382|chr18:9258931-9263790	ankyrin repeat domain 12 [Source:HGNC Symbol;Acc:HGNC:29135]	GO:0005515(protein binding);GO:0005634(nucleus);GO:0005654(nucleoplasm);GO:0005829(cytosol)	NA	NA	hsa-miR-217-3p	8mer	-0.2102	81	143	-14.88
circRNA26651	chr18	9182383	9239556	+	7	circRNA	ENST00000400020	ANKRD12	mRNA	chr18:9137873-9182382|chr18:9258931-9263790	ankyrin repeat domain 12 [Source:HGNC Symbol;Acc:HGNC:29135]	GO:0005515(protein binding);GO:0005634(nucleus);GO:0005654(nucleoplasm);GO:0005829(cytosol)	NA	NA	hsa-miR-217-5p	m8	-0.1975	80	140	-10.26
circRNA26651	chr18	9182383	9239556	+	7	circRNA	ENST00000400020	ANKRD12	mRNA	chr18:9137873-9182382|chr18:9258931-9263790	ankyrin repeat domain 12 [Source:HGNC Symbol;Acc:HGNC:29135]	GO:0005515(protein binding);GO:0005634(nucleus);GO:0005654(nucleoplasm);GO:0005829(cytosol)	NA	NA	hsa-miR-218-2-3p	1a	-0.10665	50	142	-17.12
circRNA26651	chr18	9182383	9239556	+	7	circRNA	ENST00000400020	ANKRD12	mRNA	chr18:9137873-9182382|chr18:9258931-9263790	ankyrin repeat domain 12 [Source:HGNC Symbol;Acc:HGNC:29135]	GO:0005515(protein binding);GO:0005634(nucleus);GO:0005654(nucleoplasm);GO:0005829(cytosol)	NA	NA	hsa-miR-218-5p	8mer	-0.24725	88	151	-12.79
circRNA26651	chr18	9182383	9239556	+	7	circRNA	ENST00000400020	ANKRD12	mRNA	chr18:9137873-9182382|chr18:9258931-9263790	ankyrin repeat domain 12 [Source:HGNC Symbol;Acc:HGNC:29135]	GO:0005515(protein binding);GO:0005634(nucleus);GO:0005654(nucleoplasm);GO:0005829(cytosol)	NA	NA	hsa-miR-219a-1-3p	8mer	-0.2632	90	149	-18.03
circRNA26651	chr18	9182383	9239556	+	7	circRNA	ENST00000400020	ANKRD12	mRNA	chr18:9137873-9182382|chr18:9258931-9263790	ankyrin repeat domain 12 [Source:HGNC Symbol;Acc:HGNC:29135]	GO:0005515(protein binding);GO:0005634(nucleus);GO:0005654(nucleoplasm);GO:0005829(cytosol)	NA	NA	hsa-miR-221-3p	8mer	-0.15425	71	152	-18.62
circRNA26651	chr18	9182383	9239556	+	7	circRNA	ENST00000400020	ANKRD12	mRNA	chr18:9137873-9182382|chr18:9258931-9263790	ankyrin repeat domain 12 [Source:HGNC Symbol;Acc:HGNC:29135]	GO:0005515(protein binding);GO:0005634(nucleus);GO:0005654(nucleoplasm);GO:0005829(cytosol)	NA	NA	hsa-miR-221-5p	8mer	-0.1402	75	149	-17.38
circRNA26651	chr18	9182383	9239556	+	7	circRNA	ENST00000400020	ANKRD12	mRNA	chr18:9137873-9182382|chr18:9258931-9263790	ankyrin repeat domain 12 [Source:HGNC Symbol;Acc:HGNC:29135]	GO:0005515(protein binding);GO:0005634(nucleus);GO:0005654(nucleoplasm);GO:0005829(cytosol)	NA	NA	hsa-miR-222-3p	8mer	-0.15425	71	153	-20.97
circRNA26651	chr18	9182383	9239556	+	7	circRNA	ENST00000400020	ANKRD12	mRNA	chr18:9137873-9182382|chr18:9258931-9263790	ankyrin repeat domain 12 [Source:HGNC Symbol;Acc:HGNC:29135]	GO:0005515(protein binding);GO:0005634(nucleus);GO:0005654(nucleoplasm);GO:0005829(cytosol)	NA	NA	hsa-miR-223-3p	m8	-0.1905	76	163	-12.68
circRNA26651	chr18	9182383	9239556	+	7	circRNA	ENST00000400020	ANKRD12	mRNA	chr18:9137873-9182382|chr18:9258931-9263790	ankyrin repeat domain 12 [Source:HGNC Symbol;Acc:HGNC:29135]	GO:0005515(protein binding);GO:0005634(nucleus);GO:0005654(nucleoplasm);GO:0005829(cytosol)	NA	NA	hsa-miR-223-5p	8mer	-0.3183	94	155	-14.75
circRNA26651	chr18	9182383	9239556	+	7	circRNA	ENST00000400020	ANKRD12	mRNA	chr18:9137873-9182382|chr18:9258931-9263790	ankyrin repeat domain 12 [Source:HGNC Symbol;Acc:HGNC:29135]	GO:0005515(protein binding);GO:0005634(nucleus);GO:0005654(nucleoplasm);GO:0005829(cytosol)	NA	NA	hsa-miR-22-5p	m8	-0.1875	69	147	-21.34
circRNA26651	chr18	9182383	9239556	+	7	circRNA	ENST00000400020	ANKRD12	mRNA	chr18:9137873-9182382|chr18:9258931-9263790	ankyrin repeat domain 12 [Source:HGNC Symbol;Acc:HGNC:29135]	GO:0005515(protein binding);GO:0005634(nucleus);GO:0005654(nucleoplasm);GO:0005829(cytosol)	NA	NA	hsa-miR-23a-3p	8mer	-0.27715	89	154	-19.03
circRNA26651	chr18	9182383	9239556	+	7	circRNA	ENST00000400020	ANKRD12	mRNA	chr18:9137873-9182382|chr18:9258931-9263790	ankyrin repeat domain 12 [Source:HGNC Symbol;Acc:HGNC:29135]	GO:0005515(protein binding);GO:0005634(nucleus);GO:0005654(nucleoplasm);GO:0005829(cytosol)	NA	NA	hsa-miR-23b-3p	8mer	-0.2751	89	149	-18.69
circRNA26651	chr18	9182383	9239556	+	7	circRNA	ENST00000400020	ANKRD12	mRNA	chr18:9137873-9182382|chr18:9258931-9263790	ankyrin repeat domain 12 [Source:HGNC Symbol;Acc:HGNC:29135]	GO:0005515(protein binding);GO:0005634(nucleus);GO:0005654(nucleoplasm);GO:0005829(cytosol)	NA	NA	hsa-miR-26a-1-3p	m8	-0.138	61	158	-14.99
circRNA26651	chr18	9182383	9239556	+	7	circRNA	ENST00000400020	ANKRD12	mRNA	chr18:9137873-9182382|chr18:9258931-9263790	ankyrin repeat domain 12 [Source:HGNC Symbol;Acc:HGNC:29135]	GO:0005515(protein binding);GO:0005634(nucleus);GO:0005654(nucleoplasm);GO:0005829(cytosol)	NA	NA	hsa-miR-26b-3p	m8	-0.132	52	156	-17.75
circRNA26651	chr18	9182383	9239556	+	7	circRNA	ENST00000400020	ANKRD12	mRNA	chr18:9137873-9182382|chr18:9258931-9263790	ankyrin repeat domain 12 [Source:HGNC Symbol;Acc:HGNC:29135]	GO:0005515(protein binding);GO:0005634(nucleus);GO:0005654(nucleoplasm);GO:0005829(cytosol)	NA	NA	hsa-miR-27a-3p	1a	-0.1103	51	143	-16.46
circRNA26651	chr18	9182383	9239556	+	7	circRNA	ENST00000400020	ANKRD12	mRNA	chr18:9137873-9182382|chr18:9258931-9263790	ankyrin repeat domain 12 [Source:HGNC Symbol;Acc:HGNC:29135]	GO:0005515(protein binding);GO:0005634(nucleus);GO:0005654(nucleoplasm);GO:0005829(cytosol)	NA	NA	hsa-miR-27b-3p	1a	-0.1103	51	141	-14.27
circRNA26651	chr18	9182383	9239556	+	7	circRNA	ENST00000400020	ANKRD12	mRNA	chr18:9137873-9182382|chr18:9258931-9263790	ankyrin repeat domain 12 [Source:HGNC Symbol;Acc:HGNC:29135]	GO:0005515(protein binding);GO:0005634(nucleus);GO:0005654(nucleoplasm);GO:0005829(cytosol)	NA	NA	hsa-miR-29a-5p	8mer	-0.2382	83	152	-14.78
circRNA26651	chr18	9182383	9239556	+	7	circRNA	ENST00000400020	ANKRD12	mRNA	chr18:9137873-9182382|chr18:9258931-9263790	ankyrin repeat domain 12 [Source:HGNC Symbol;Acc:HGNC:29135]	GO:0005515(protein binding);GO:0005634(nucleus);GO:0005654(nucleoplasm);GO:0005829(cytosol)	NA	NA	hsa-miR-29b-1-5p	1a	-0.1412	58	148	-28.8
circRNA26651	chr18	9182383	9239556	+	7	circRNA	ENST00000400020	ANKRD12	mRNA	chr18:9137873-9182382|chr18:9258931-9263790	ankyrin repeat domain 12 [Source:HGNC Symbol;Acc:HGNC:29135]	GO:0005515(protein binding);GO:0005634(nucleus);GO:0005654(nucleoplasm);GO:0005829(cytosol)	NA	NA	hsa-miR-29b-2-5p	1a	-0.11665	52	145	-14.27
circRNA26651	chr18	9182383	9239556	+	7	circRNA	ENST00000400020	ANKRD12	mRNA	chr18:9137873-9182382|chr18:9258931-9263790	ankyrin repeat domain 12 [Source:HGNC Symbol;Acc:HGNC:29135]	GO:0005515(protein binding);GO:0005634(nucleus);GO:0005654(nucleoplasm);GO:0005829(cytosol)	NA	NA	hsa-miR-30a-3p	8mer	-0.39515	96	152	-15.97
circRNA26651	chr18	9182383	9239556	+	7	circRNA	ENST00000400020	ANKRD12	mRNA	chr18:9137873-9182382|chr18:9258931-9263790	ankyrin repeat domain 12 [Source:HGNC Symbol;Acc:HGNC:29135]	GO:0005515(protein binding);GO:0005634(nucleus);GO:0005654(nucleoplasm);GO:0005829(cytosol)	NA	NA	hsa-miR-30b-3p	1a	-0.0902	70	164	-31.47
circRNA26651	chr18	9182383	9239556	+	7	circRNA	ENST00000400020	ANKRD12	mRNA	chr18:9137873-9182382|chr18:9258931-9263790	ankyrin repeat domain 12 [Source:HGNC Symbol;Acc:HGNC:29135]	GO:0005515(protein binding);GO:0005634(nucleus);GO:0005654(nucleoplasm);GO:0005829(cytosol)	NA	NA	hsa-miR-30c-2-3p	8mer	-0.1422	83	163	-24.79
circRNA26651	chr18	9182383	9239556	+	7	circRNA	ENST00000400020	ANKRD12	mRNA	chr18:9137873-9182382|chr18:9258931-9263790	ankyrin repeat domain 12 [Source:HGNC Symbol;Acc:HGNC:29135]	GO:0005515(protein binding);GO:0005634(nucleus);GO:0005654(nucleoplasm);GO:0005829(cytosol)	NA	NA	hsa-miR-30d-3p	8mer	-0.39515	96	150	-13.63
circRNA26651	chr18	9182383	9239556	+	7	circRNA	ENST00000400020	ANKRD12	mRNA	chr18:9137873-9182382|chr18:9258931-9263790	ankyrin repeat domain 12 [Source:HGNC Symbol;Acc:HGNC:29135]	GO:0005515(protein binding);GO:0005634(nucleus);GO:0005654(nucleoplasm);GO:0005829(cytosol)	NA	NA	hsa-miR-31-5p	8mer	-0.23815	88	141	-12.12
circRNA26651	chr18	9182383	9239556	+	7	circRNA	ENST00000400020	ANKRD12	mRNA	chr18:9137873-9182382|chr18:9258931-9263790	ankyrin repeat domain 12 [Source:HGNC Symbol;Acc:HGNC:29135]	GO:0005515(protein binding);GO:0005634(nucleus);GO:0005654(nucleoplasm);GO:0005829(cytosol)	NA	NA	hsa-miR-33a-3p	m8	-0.154	58	140	-13.78
circRNA26651	chr18	9182383	9239556	+	7	circRNA	ENST00000400020	ANKRD12	mRNA	chr18:9137873-9182382|chr18:9258931-9263790	ankyrin repeat domain 12 [Source:HGNC Symbol;Acc:HGNC:29135]	GO:0005515(protein binding);GO:0005634(nucleus);GO:0005654(nucleoplasm);GO:0005829(cytosol)	NA	NA	hsa-miR-34a-3p	m8	-0.1865	77	145	-17.43
circRNA26651	chr18	9182383	9239556	+	7	circRNA	ENST00000400020	ANKRD12	mRNA	chr18:9137873-9182382|chr18:9258931-9263790	ankyrin repeat domain 12 [Source:HGNC Symbol;Acc:HGNC:29135]	GO:0005515(protein binding);GO:0005634(nucleus);GO:0005654(nucleoplasm);GO:0005829(cytosol)	NA	NA	hsa-miR-7-5p	8mer	-0.3082	91	177	-20.53
circRNA26651	chr18	9182383	9239556	+	7	circRNA	ENST00000400020	ANKRD12	mRNA	chr18:9137873-9182382|chr18:9258931-9263790	ankyrin repeat domain 12 [Source:HGNC Symbol;Acc:HGNC:29135]	GO:0005515(protein binding);GO:0005634(nucleus);GO:0005654(nucleoplasm);GO:0005829(cytosol)	NA	NA	hsa-miR-96-5p	8mer	-0.20925	85	164	-18.63
hsa_circ_0114049	chr1	70292388	70300908	-	3	circRNA	ENST00000370944	ANKRD13C	mRNA	chr1:70276844-70292387|chr1:70300908-70306223	ankyrin repeat domain 13C [Source:HGNC Symbol;Acc:HGNC:25374]	GO:0005102(signaling receptor binding);GO:0005515(protein binding);GO:0005737(cytoplasm);GO:0005783(endoplasmic reticulum);GO:0005789(endoplasmic reticulum membrane);GO:0006621(protein retention in ER lumen);GO:0010869(regulation of receptor biosynthetic process);GO:0016020(membrane);GO:0048471(perinuclear region of cytoplasm);GO:2000209(regulation of anoikis)	NA	NA	hsa-miR-181b-3p	8mer	-0.37725	97	140	-10.49
hsa_circ_0114049	chr1	70292388	70300908	-	3	circRNA	ENST00000370944	ANKRD13C	mRNA	chr1:70276844-70292387|chr1:70300908-70306223	ankyrin repeat domain 13C [Source:HGNC Symbol;Acc:HGNC:25374]	GO:0005102(signaling receptor binding);GO:0005515(protein binding);GO:0005737(cytoplasm);GO:0005783(endoplasmic reticulum);GO:0005789(endoplasmic reticulum membrane);GO:0006621(protein retention in ER lumen);GO:0010869(regulation of receptor biosynthetic process);GO:0016020(membrane);GO:0048471(perinuclear region of cytoplasm);GO:2000209(regulation of anoikis)	NA	NA	hsa-miR-96-5p	m8	-0.2195	87	145	-13.04
hsa_circ_0009084	chr3	43549720	43565727	-	4	circRNA	ENST00000292246	ANO10	mRNA	chr3:43432727-43549719|chr3:43565727-43574808	anoctamin 10 [Source:HGNC Symbol;Acc:HGNC:25519]	GO:0005227(calcium activated cation channel activity);GO:0005229(intracellular calcium activated chloride channel activity);GO:0005886(plasma membrane);GO:0006812(cation transport);GO:0006821(chloride transport);GO:0016020(membrane);GO:0016021(integral component of membrane);GO:0034220(ion transmembrane transport);GO:0043231(intracellular membrane-bounded organelle);GO:0055085(transmembrane trans…	NA	NA	hsa-miR-18a-5p	m8	-0.1985	83	149	-14.5
hsa_circ_0009084	chr3	43549720	43565727	-	4	circRNA	ENST00000292246	ANO10	mRNA	chr3:43432727-43549719|chr3:43565727-43574808	anoctamin 10 [Source:HGNC Symbol;Acc:HGNC:25519]	GO:0005227(calcium activated cation channel activity);GO:0005229(intracellular calcium activated chloride channel activity);GO:0005886(plasma membrane);GO:0006812(cation transport);GO:0006821(chloride transport);GO:0016020(membrane);GO:0016021(integral component of membrane);GO:0034220(ion transmembrane transport);GO:0043231(intracellular membrane-bounded organelle);GO:0055085(transmembrane trans…	NA	NA	hsa-miR-20a-3p	m8	-0.1985	78	140	-13.57
hsa_circ_0009084	chr3	43549720	43565727	-	4	circRNA	ENST00000292246	ANO10	mRNA	chr3:43432727-43549719|chr3:43565727-43574808	anoctamin 10 [Source:HGNC Symbol;Acc:HGNC:25519]	GO:0005227(calcium activated cation channel activity);GO:0005229(intracellular calcium activated chloride channel activity);GO:0005886(plasma membrane);GO:0006812(cation transport);GO:0006821(chloride transport);GO:0016020(membrane);GO:0016021(integral component of membrane);GO:0034220(ion transmembrane transport);GO:0043231(intracellular membrane-bounded organelle);GO:0055085(transmembrane trans…	NA	NA	hsa-miR-217-5p	m8	-0.2375	87	141	-14.77
hsa_circ_0009084	chr3	43549720	43565727	-	4	circRNA	ENST00000292246	ANO10	mRNA	chr3:43432727-43549719|chr3:43565727-43574808	anoctamin 10 [Source:HGNC Symbol;Acc:HGNC:25519]	GO:0005227(calcium activated cation channel activity);GO:0005229(intracellular calcium activated chloride channel activity);GO:0005886(plasma membrane);GO:0006812(cation transport);GO:0006821(chloride transport);GO:0016020(membrane);GO:0016021(integral component of membrane);GO:0034220(ion transmembrane transport);GO:0043231(intracellular membrane-bounded organelle);GO:0055085(transmembrane trans…	NA	NA	hsa-miR-30b-3p	m8	-0.2325	94	150	-21.72
hsa_circ_0009084	chr3	43549720	43565727	-	4	circRNA	ENST00000292246	ANO10	mRNA	chr3:43432727-43549719|chr3:43565727-43574808	anoctamin 10 [Source:HGNC Symbol;Acc:HGNC:25519]	GO:0005227(calcium activated cation channel activity);GO:0005229(intracellular calcium activated chloride channel activity);GO:0005886(plasma membrane);GO:0006812(cation transport);GO:0006821(chloride transport);GO:0016020(membrane);GO:0016021(integral component of membrane);GO:0034220(ion transmembrane transport);GO:0043231(intracellular membrane-bounded organelle);GO:0055085(transmembrane trans…	NA	NA	hsa-miR-34a-3p	m8	-0.13	56	148	-16.4
hsa_circ_0002191	chr9	94773002	94801002	+	3	circRNA	ENST00000277198	AOPEP	mRNA	chr9:94760580-94773001|chr9:94801002-94923985	aminopeptidase O (putative) [Source:HGNC Symbol;Acc:HGNC:1361]	GO:0002003(angiotensin maturation);GO:0004177(aminopeptidase activity);GO:0005634(nucleus);GO:0005730(nucleolus);GO:0005737(cytoplasm);GO:0005829(cytosol);GO:0006508(proteolysis);GO:0008233(peptidase activity);GO:0008237(metallopeptidase activity);GO:0008270(zinc ion binding);GO:0016787(hydrolase activity);GO:0046872(metal ion binding);GO:0070006(metalloaminopeptidase activity)	NA	NA	hsa-miR-211-3p	m8	-0.139	73	140	-21.54
hsa_circ_0002191	chr9	94773002	94801002	+	3	circRNA	ENST00000277198	AOPEP	mRNA	chr9:94760580-94773001|chr9:94801002-94923985	aminopeptidase O (putative) [Source:HGNC Symbol;Acc:HGNC:1361]	GO:0002003(angiotensin maturation);GO:0004177(aminopeptidase activity);GO:0005634(nucleus);GO:0005730(nucleolus);GO:0005737(cytoplasm);GO:0005829(cytosol);GO:0006508(proteolysis);GO:0008233(peptidase activity);GO:0008237(metallopeptidase activity);GO:0008270(zinc ion binding);GO:0016787(hydrolase activity);GO:0046872(metal ion binding);GO:0070006(metalloaminopeptidase activity)	NA	NA	hsa-miR-21-3p	m8	-0.195	76	144	-15.76
hsa_circ_0002191	chr9	94773002	94801002	+	3	circRNA	ENST00000277198	AOPEP	mRNA	chr9:94760580-94773001|chr9:94801002-94923985	aminopeptidase O (putative) [Source:HGNC Symbol;Acc:HGNC:1361]	GO:0002003(angiotensin maturation);GO:0004177(aminopeptidase activity);GO:0005634(nucleus);GO:0005730(nucleolus);GO:0005737(cytoplasm);GO:0005829(cytosol);GO:0006508(proteolysis);GO:0008233(peptidase activity);GO:0008237(metallopeptidase activity);GO:0008270(zinc ion binding);GO:0016787(hydrolase activity);GO:0046872(metal ion binding);GO:0070006(metalloaminopeptidase activity)	NA	NA	hsa-miR-221-5p	8mer	-0.32815	96	149	-14.71
hsa_circ_0002191	chr9	94773002	94801002	+	3	circRNA	ENST00000277198	AOPEP	mRNA	chr9:94760580-94773001|chr9:94801002-94923985	aminopeptidase O (putative) [Source:HGNC Symbol;Acc:HGNC:1361]	GO:0002003(angiotensin maturation);GO:0004177(aminopeptidase activity);GO:0005634(nucleus);GO:0005730(nucleolus);GO:0005737(cytoplasm);GO:0005829(cytosol);GO:0006508(proteolysis);GO:0008233(peptidase activity);GO:0008237(metallopeptidase activity);GO:0008270(zinc ion binding);GO:0016787(hydrolase activity);GO:0046872(metal ion binding);GO:0070006(metalloaminopeptidase activity)	NA	NA	hsa-miR-30c-2-3p	m8	-0.177	89	141	-12
hsa_circ_0002191	chr9	94773002	94801002	+	3	circRNA	ENST00000277198	AOPEP	mRNA	chr9:94760580-94773001|chr9:94801002-94923985	aminopeptidase O (putative) [Source:HGNC Symbol;Acc:HGNC:1361]	GO:0002003(angiotensin maturation);GO:0004177(aminopeptidase activity);GO:0005634(nucleus);GO:0005730(nucleolus);GO:0005737(cytoplasm);GO:0005829(cytosol);GO:0006508(proteolysis);GO:0008233(peptidase activity);GO:0008237(metallopeptidase activity);GO:0008270(zinc ion binding);GO:0016787(hydrolase activity);GO:0046872(metal ion binding);GO:0070006(metalloaminopeptidase activity)	NA	NA	hsa-miR-93-3p	m8	-0.149	68	145	-15.93
ciRNA2788	chr2	68490190	68515736	+	1	ciRNA	ENST00000529851	APLF	mRNA	chr2:68490189-68515736	aprataxin and PNKP like factor [Source:HGNC Symbol;Acc:HGNC:28724]	GO:0000012(single strand break repair);GO:0000166(nucleotide binding);GO:0003906(DNA-(apurinic or apyrimidinic site) endonuclease activity);GO:0004520(endodeoxyribonuclease activity);GO:0004930(G protein-coupled receptor activity);GO:0004983(neuropeptide Y receptor activity);GO:0005515(protein binding);GO:0005634(nucleus);GO:0005654(nucleoplasm);GO:0005694(chromosome);GO:0005737(cytoplasm);GO:000…	NA	EC:4.2.99.18	hsa-let-7a-2-3p	1a	-0.1782	76	149	-16.4
ciRNA2788	chr2	68490190	68515736	+	1	ciRNA	ENST00000529851	APLF	mRNA	chr2:68490189-68515736	aprataxin and PNKP like factor [Source:HGNC Symbol;Acc:HGNC:28724]	GO:0000012(single strand break repair);GO:0000166(nucleotide binding);GO:0003906(DNA-(apurinic or apyrimidinic site) endonuclease activity);GO:0004520(endodeoxyribonuclease activity);GO:0004930(G protein-coupled receptor activity);GO:0004983(neuropeptide Y receptor activity);GO:0005515(protein binding);GO:0005634(nucleus);GO:0005654(nucleoplasm);GO:0005694(chromosome);GO:0005737(cytoplasm);GO:000…	NA	EC:4.2.99.18	hsa-let-7a-3p	m8	-0.173	70	150	-17.42
circRNA23863	chr2	68490191	68578003	+	10	circRNA	ENST00000445692	APLF	mRNA	chr2:68467827-68490190	aprataxin and PNKP like factor [Source:HGNC Symbol;Acc:HGNC:28724]	GO:0000012(single strand break repair);GO:0000166(nucleotide binding);GO:0003906(DNA-(apurinic or apyrimidinic site) endonuclease activity);GO:0004520(endodeoxyribonuclease activity);GO:0004930(G protein-coupled receptor activity);GO:0004983(neuropeptide Y receptor activity);GO:0005515(protein binding);GO:0005634(nucleus);GO:0005654(nucleoplasm);GO:0005694(chromosome);GO:0005737(cytoplasm);GO:000…	NA	EC:4.2.99.18	hsa-let-7a-3p	8mer	-0.5352	99	147	-16.56
ciRNA2788	chr2	68490190	68515736	+	1	ciRNA	ENST00000529851	APLF	mRNA	chr2:68490189-68515736	aprataxin and PNKP like factor [Source:HGNC Symbol;Acc:HGNC:28724]	GO:0000012(single strand break repair);GO:0000166(nucleotide binding);GO:0003906(DNA-(apurinic or apyrimidinic site) endonuclease activity);GO:0004520(endodeoxyribonuclease activity);GO:0004930(G protein-coupled receptor activity);GO:0004983(neuropeptide Y receptor activity);GO:0005515(protein binding);GO:0005634(nucleus);GO:0005654(nucleoplasm);GO:0005694(chromosome);GO:0005737(cytoplasm);GO:000…	NA	EC:4.2.99.18	hsa-let-7a-5p	m8	-0.161	72	155	-17.34
ciRNA2788	chr2	68490190	68515736	+	1	ciRNA	ENST00000529851	APLF	mRNA	chr2:68490189-68515736	aprataxin and PNKP like factor [Source:HGNC Symbol;Acc:HGNC:28724]	GO:0000012(single strand break repair);GO:0000166(nucleotide binding);GO:0003906(DNA-(apurinic or apyrimidinic site) endonuclease activity);GO:0004520(endodeoxyribonuclease activity);GO:0004930(G protein-coupled receptor activity);GO:0004983(neuropeptide Y receptor activity);GO:0005515(protein binding);GO:0005634(nucleus);GO:0005654(nucleoplasm);GO:0005694(chromosome);GO:0005737(cytoplasm);GO:000…	NA	EC:4.2.99.18	hsa-let-7b-3p	m8	-0.173	72	149	-27.12
circRNA23863	chr2	68490191	68578003	+	10	circRNA	ENST00000445692	APLF	mRNA	chr2:68467827-68490190	aprataxin and PNKP like factor [Source:HGNC Symbol;Acc:HGNC:28724]	GO:0000012(single strand break repair);GO:0000166(nucleotide binding);GO:0003906(DNA-(apurinic or apyrimidinic site) endonuclease activity);GO:0004520(endodeoxyribonuclease activity);GO:0004930(G protein-coupled receptor activity);GO:0004983(neuropeptide Y receptor activity);GO:0005515(protein binding);GO:0005634(nucleus);GO:0005654(nucleoplasm);GO:0005694(chromosome);GO:0005737(cytoplasm);GO:000…	NA	EC:4.2.99.18	hsa-let-7b-3p	8mer	-0.5352	99	146	-18.37
ciRNA2788	chr2	68490190	68515736	+	1	ciRNA	ENST00000529851	APLF	mRNA	chr2:68490189-68515736	aprataxin and PNKP like factor [Source:HGNC Symbol;Acc:HGNC:28724]	GO:0000012(single strand break repair);GO:0000166(nucleotide binding);GO:0003906(DNA-(apurinic or apyrimidinic site) endonuclease activity);GO:0004520(endodeoxyribonuclease activity);GO:0004930(G protein-coupled receptor activity);GO:0004983(neuropeptide Y receptor activity);GO:0005515(protein binding);GO:0005634(nucleus);GO:0005654(nucleoplasm);GO:0005694(chromosome);GO:0005737(cytoplasm);GO:000…	NA	EC:4.2.99.18	hsa-let-7b-5p	m8	-0.161	73	151	-20.01
ciRNA2788	chr2	68490190	68515736	+	1	ciRNA	ENST00000529851	APLF	mRNA	chr2:68490189-68515736	aprataxin and PNKP like factor [Source:HGNC Symbol;Acc:HGNC:28724]	GO:0000012(single strand break repair);GO:0000166(nucleotide binding);GO:0003906(DNA-(apurinic or apyrimidinic site) endonuclease activity);GO:0004520(endodeoxyribonuclease activity);GO:0004930(G protein-coupled receptor activity);GO:0004983(neuropeptide Y receptor activity);GO:0005515(protein binding);GO:0005634(nucleus);GO:0005654(nucleoplasm);GO:0005694(chromosome);GO:0005737(cytoplasm);GO:000…	NA	EC:4.2.99.18	hsa-let-7c-3p	1a	-0.1782	73	147	-11.33
ciRNA2788	chr2	68490190	68515736	+	1	ciRNA	ENST00000529851	APLF	mRNA	chr2:68490189-68515736	aprataxin and PNKP like factor [Source:HGNC Symbol;Acc:HGNC:28724]	GO:0000012(single strand break repair);GO:0000166(nucleotide binding);GO:0003906(DNA-(apurinic or apyrimidinic site) endonuclease activity);GO:0004520(endodeoxyribonuclease activity);GO:0004930(G protein-coupled receptor activity);GO:0004983(neuropeptide Y receptor activity);GO:0005515(protein binding);GO:0005634(nucleus);GO:0005654(nucleoplasm);GO:0005694(chromosome);GO:0005737(cytoplasm);GO:000…	NA	EC:4.2.99.18	hsa-let-7c-5p	m8	-0.161	72	153	-20.01
ciRNA2788	chr2	68490190	68515736	+	1	ciRNA	ENST00000529851	APLF	mRNA	chr2:68490189-68515736	aprataxin and PNKP like factor [Source:HGNC Symbol;Acc:HGNC:28724]	GO:0000012(single strand break repair);GO:0000166(nucleotide binding);GO:0003906(DNA-(apurinic or apyrimidinic site) endonuclease activity);GO:0004520(endodeoxyribonuclease activity);GO:0004930(G protein-coupled receptor activity);GO:0004983(neuropeptide Y receptor activity);GO:0005515(protein binding);GO:0005634(nucleus);GO:0005654(nucleoplasm);GO:0005694(chromosome);GO:0005737(cytoplasm);GO:000…	NA	EC:4.2.99.18	hsa-let-7d-3p	8mer	-0.25025	90	156	-14.65
ciRNA2788	chr2	68490190	68515736	+	1	ciRNA	ENST00000529851	APLF	mRNA	chr2:68490189-68515736	aprataxin and PNKP like factor [Source:HGNC Symbol;Acc:HGNC:28724]	GO:0000012(single strand break repair);GO:0000166(nucleotide binding);GO:0003906(DNA-(apurinic or apyrimidinic site) endonuclease activity);GO:0004520(endodeoxyribonuclease activity);GO:0004930(G protein-coupled receptor activity);GO:0004983(neuropeptide Y receptor activity);GO:0005515(protein binding);GO:0005634(nucleus);GO:0005654(nucleoplasm);GO:0005694(chromosome);GO:0005737(cytoplasm);GO:000…	NA	EC:4.2.99.18	hsa-let-7d-5p	m8	-0.161	72	155	-18.51
ciRNA2788	chr2	68490190	68515736	+	1	ciRNA	ENST00000529851	APLF	mRNA	chr2:68490189-68515736	aprataxin and PNKP like factor [Source:HGNC Symbol;Acc:HGNC:28724]	GO:0000012(single strand break repair);GO:0000166(nucleotide binding);GO:0003906(DNA-(apurinic or apyrimidinic site) endonuclease activity);GO:0004520(endodeoxyribonuclease activity);GO:0004930(G protein-coupled receptor activity);GO:0004983(neuropeptide Y receptor activity);GO:0005515(protein binding);GO:0005634(nucleus);GO:0005654(nucleoplasm);GO:0005694(chromosome);GO:0005737(cytoplasm);GO:000…	NA	EC:4.2.99.18	hsa-let-7e-5p	m8	-0.161	72	159	-24.71
ciRNA2788	chr2	68490190	68515736	+	1	ciRNA	ENST00000529851	APLF	mRNA	chr2:68490189-68515736	aprataxin and PNKP like factor [Source:HGNC Symbol;Acc:HGNC:28724]	GO:0000012(single strand break repair);GO:0000166(nucleotide binding);GO:0003906(DNA-(apurinic or apyrimidinic site) endonuclease activity);GO:0004520(endodeoxyribonuclease activity);GO:0004930(G protein-coupled receptor activity);GO:0004983(neuropeptide Y receptor activity);GO:0005515(protein binding);GO:0005634(nucleus);GO:0005654(nucleoplasm);GO:0005694(chromosome);GO:0005737(cytoplasm);GO:000…	NA	EC:4.2.99.18	hsa-let-7f-1-3p	m8	-0.142	58	149	-15.81
circRNA23863	chr2	68490191	68578003	+	10	circRNA	ENST00000445692	APLF	mRNA	chr2:68467827-68490190	aprataxin and PNKP like factor [Source:HGNC Symbol;Acc:HGNC:28724]	GO:0000012(single strand break repair);GO:0000166(nucleotide binding);GO:0003906(DNA-(apurinic or apyrimidinic site) endonuclease activity);GO:0004520(endodeoxyribonuclease activity);GO:0004930(G protein-coupled receptor activity);GO:0004983(neuropeptide Y receptor activity);GO:0005515(protein binding);GO:0005634(nucleus);GO:0005654(nucleoplasm);GO:0005694(chromosome);GO:0005737(cytoplasm);GO:000…	NA	EC:4.2.99.18	hsa-let-7f-1-3p	8mer	-0.5352	99	143	-10.87
ciRNA2788	chr2	68490190	68515736	+	1	ciRNA	ENST00000529851	APLF	mRNA	chr2:68490189-68515736	aprataxin and PNKP like factor [Source:HGNC Symbol;Acc:HGNC:28724]	GO:0000012(single strand break repair);GO:0000166(nucleotide binding);GO:0003906(DNA-(apurinic or apyrimidinic site) endonuclease activity);GO:0004520(endodeoxyribonuclease activity);GO:0004930(G protein-coupled receptor activity);GO:0004983(neuropeptide Y receptor activity);GO:0005515(protein binding);GO:0005634(nucleus);GO:0005654(nucleoplasm);GO:0005694(chromosome);GO:0005737(cytoplasm);GO:000…	NA	EC:4.2.99.18	hsa-let-7f-2-3p	m8	-0.2075	85	151	-16.45
circRNA23863	chr2	68490191	68578003	+	10	circRNA	ENST00000445692	APLF	mRNA	chr2:68467827-68490190	aprataxin and PNKP like factor [Source:HGNC Symbol;Acc:HGNC:28724]	GO:0000012(single strand break repair);GO:0000166(nucleotide binding);GO:0003906(DNA-(apurinic or apyrimidinic site) endonuclease activity);GO:0004520(endodeoxyribonuclease activity);GO:0004930(G protein-coupled receptor activity);GO:0004983(neuropeptide Y receptor activity);GO:0005515(protein binding);GO:0005634(nucleus);GO:0005654(nucleoplasm);GO:0005694(chromosome);GO:0005737(cytoplasm);GO:000…	NA	EC:4.2.99.18	hsa-let-7f-2-3p	1a	-0.2282	88	148	-13.86
ciRNA2788	chr2	68490190	68515736	+	1	ciRNA	ENST00000529851	APLF	mRNA	chr2:68490189-68515736	aprataxin and PNKP like factor [Source:HGNC Symbol;Acc:HGNC:28724]	GO:0000012(single strand break repair);GO:0000166(nucleotide binding);GO:0003906(DNA-(apurinic or apyrimidinic site) endonuclease activity);GO:0004520(endodeoxyribonuclease activity);GO:0004930(G protein-coupled receptor activity);GO:0004983(neuropeptide Y receptor activity);GO:0005515(protein binding);GO:0005634(nucleus);GO:0005654(nucleoplasm);GO:0005694(chromosome);GO:0005737(cytoplasm);GO:000…	NA	EC:4.2.99.18	hsa-let-7f-5p	m8	-0.1765	77	156	-19.01
ciRNA2788	chr2	68490190	68515736	+	1	ciRNA	ENST00000529851	APLF	mRNA	chr2:68490189-68515736	aprataxin and PNKP like factor [Source:HGNC Symbol;Acc:HGNC:28724]	GO:0000012(single strand break repair);GO:0000166(nucleotide binding);GO:0003906(DNA-(apurinic or apyrimidinic site) endonuclease activity);GO:0004520(endodeoxyribonuclease activity);GO:0004930(G protein-coupled receptor activity);GO:0004983(neuropeptide Y receptor activity);GO:0005515(protein binding);GO:0005634(nucleus);GO:0005654(nucleoplasm);GO:0005694(chromosome);GO:0005737(cytoplasm);GO:000…	NA	EC:4.2.99.18	hsa-let-7g-3p	1a	-0.1782	76	153	-19.28
ciRNA2788	chr2	68490190	68515736	+	1	ciRNA	ENST00000529851	APLF	mRNA	chr2:68490189-68515736	aprataxin and PNKP like factor [Source:HGNC Symbol;Acc:HGNC:28724]	GO:0000012(single strand break repair);GO:0000166(nucleotide binding);GO:0003906(DNA-(apurinic or apyrimidinic site) endonuclease activity);GO:0004520(endodeoxyribonuclease activity);GO:0004930(G protein-coupled receptor activity);GO:0004983(neuropeptide Y receptor activity);GO:0005515(protein binding);GO:0005634(nucleus);GO:0005654(nucleoplasm);GO:0005694(chromosome);GO:0005737(cytoplasm);GO:000…	NA	EC:4.2.99.18	hsa-let-7g-5p	m8	-0.1765	77	167	-21.33
ciRNA2788	chr2	68490190	68515736	+	1	ciRNA	ENST00000529851	APLF	mRNA	chr2:68490189-68515736	aprataxin and PNKP like factor [Source:HGNC Symbol;Acc:HGNC:28724]	GO:0000012(single strand break repair);GO:0000166(nucleotide binding);GO:0003906(DNA-(apurinic or apyrimidinic site) endonuclease activity);GO:0004520(endodeoxyribonuclease activity);GO:0004930(G protein-coupled receptor activity);GO:0004983(neuropeptide Y receptor activity);GO:0005515(protein binding);GO:0005634(nucleus);GO:0005654(nucleoplasm);GO:0005694(chromosome);GO:0005737(cytoplasm);GO:000…	NA	EC:4.2.99.18	hsa-let-7i-5p	m8	-0.1765	77	159	-16.2
ciRNA2788	chr2	68490190	68515736	+	1	ciRNA	ENST00000529851	APLF	mRNA	chr2:68490189-68515736	aprataxin and PNKP like factor [Source:HGNC Symbol;Acc:HGNC:28724]	GO:0000012(single strand break repair);GO:0000166(nucleotide binding);GO:0003906(DNA-(apurinic or apyrimidinic site) endonuclease activity);GO:0004520(endodeoxyribonuclease activity);GO:0004930(G protein-coupled receptor activity);GO:0004983(neuropeptide Y receptor activity);GO:0005515(protein binding);GO:0005634(nucleus);GO:0005654(nucleoplasm);GO:0005694(chromosome);GO:0005737(cytoplasm);GO:000…	NA	EC:4.2.99.18	hsa-miR-100-3p	m8	-0.146	65	160	-17.68
ciRNA2788	chr2	68490190	68515736	+	1	ciRNA	ENST00000529851	APLF	mRNA	chr2:68490189-68515736	aprataxin and PNKP like factor [Source:HGNC Symbol;Acc:HGNC:28724]	GO:0000012(single strand break repair);GO:0000166(nucleotide binding);GO:0003906(DNA-(apurinic or apyrimidinic site) endonuclease activity);GO:0004520(endodeoxyribonuclease activity);GO:0004930(G protein-coupled receptor activity);GO:0004983(neuropeptide Y receptor activity);GO:0005515(protein binding);GO:0005634(nucleus);GO:0005654(nucleoplasm);GO:0005694(chromosome);GO:0005737(cytoplasm);GO:000…	NA	EC:4.2.99.18	hsa-miR-101-5p	m8	-0.183	77	159	-14.63
ciRNA2788	chr2	68490190	68515736	+	1	ciRNA	ENST00000529851	APLF	mRNA	chr2:68490189-68515736	aprataxin and PNKP like factor [Source:HGNC Symbol;Acc:HGNC:28724]	GO:0000012(single strand break repair);GO:0000166(nucleotide binding);GO:0003906(DNA-(apurinic or apyrimidinic site) endonuclease activity);GO:0004520(endodeoxyribonuclease activity);GO:0004930(G protein-coupled receptor activity);GO:0004983(neuropeptide Y receptor activity);GO:0005515(protein binding);GO:0005634(nucleus);GO:0005654(nucleoplasm);GO:0005694(chromosome);GO:0005737(cytoplasm);GO:000…	NA	EC:4.2.99.18	hsa-miR-103a-1-5p	m8	-0.1385	56	150	-17.06
circRNA23863	chr2	68490191	68578003	+	10	circRNA	ENST00000445692	APLF	mRNA	chr2:68467827-68490190	aprataxin and PNKP like factor [Source:HGNC Symbol;Acc:HGNC:28724]	GO:0000012(single strand break repair);GO:0000166(nucleotide binding);GO:0003906(DNA-(apurinic or apyrimidinic site) endonuclease activity);GO:0004520(endodeoxyribonuclease activity);GO:0004930(G protein-coupled receptor activity);GO:0004983(neuropeptide Y receptor activity);GO:0005515(protein binding);GO:0005634(nucleus);GO:0005654(nucleoplasm);GO:0005694(chromosome);GO:0005737(cytoplasm);GO:000…	NA	EC:4.2.99.18	hsa-miR-103a-1-5p	1a	-0.15565	62	159	-22.65
ciRNA2788	chr2	68490190	68515736	+	1	ciRNA	ENST00000529851	APLF	mRNA	chr2:68490189-68515736	aprataxin and PNKP like factor [Source:HGNC Symbol;Acc:HGNC:28724]	GO:0000012(single strand break repair);GO:0000166(nucleotide binding);GO:0003906(DNA-(apurinic or apyrimidinic site) endonuclease activity);GO:0004520(endodeoxyribonuclease activity);GO:0004930(G protein-coupled receptor activity);GO:0004983(neuropeptide Y receptor activity);GO:0005515(protein binding);GO:0005634(nucleus);GO:0005654(nucleoplasm);GO:0005694(chromosome);GO:0005737(cytoplasm);GO:000…	NA	EC:4.2.99.18	hsa-miR-103a-2-5p	m8	-0.1385	56	150	-17.87
circRNA23863	chr2	68490191	68578003	+	10	circRNA	ENST00000445692	APLF	mRNA	chr2:68467827-68490190	aprataxin and PNKP like factor [Source:HGNC Symbol;Acc:HGNC:28724]	GO:0000012(single strand break repair);GO:0000166(nucleotide binding);GO:0003906(DNA-(apurinic or apyrimidinic site) endonuclease activity);GO:0004520(endodeoxyribonuclease activity);GO:0004930(G protein-coupled receptor activity);GO:0004983(neuropeptide Y receptor activity);GO:0005515(protein binding);GO:0005634(nucleus);GO:0005654(nucleoplasm);GO:0005694(chromosome);GO:0005737(cytoplasm);GO:000…	NA	EC:4.2.99.18	hsa-miR-103a-2-5p	1a	-0.15565	62	159	-18.8
ciRNA2788	chr2	68490190	68515736	+	1	ciRNA	ENST00000529851	APLF	mRNA	chr2:68490189-68515736	aprataxin and PNKP like factor [Source:HGNC Symbol;Acc:HGNC:28724]	GO:0000012(single strand break repair);GO:0000166(nucleotide binding);GO:0003906(DNA-(apurinic or apyrimidinic site) endonuclease activity);GO:0004520(endodeoxyribonuclease activity);GO:0004930(G protein-coupled receptor activity);GO:0004983(neuropeptide Y receptor activity);GO:0005515(protein binding);GO:0005634(nucleus);GO:0005654(nucleoplasm);GO:0005694(chromosome);GO:0005737(cytoplasm);GO:000…	NA	EC:4.2.99.18	hsa-miR-103a-3p	8mer	-0.20825	83	148	-14.21
ciRNA2788	chr2	68490190	68515736	+	1	ciRNA	ENST00000529851	APLF	mRNA	chr2:68490189-68515736	aprataxin and PNKP like factor [Source:HGNC Symbol;Acc:HGNC:28724]	GO:0000012(single strand break repair);GO:0000166(nucleotide binding);GO:0003906(DNA-(apurinic or apyrimidinic site) endonuclease activity);GO:0004520(endodeoxyribonuclease activity);GO:0004930(G protein-coupled receptor activity);GO:0004983(neuropeptide Y receptor activity);GO:0005515(protein binding);GO:0005634(nucleus);GO:0005654(nucleoplasm);GO:0005694(chromosome);GO:0005737(cytoplasm);GO:000…	NA	EC:4.2.99.18	hsa-miR-105-5p	8mer	-0.16725	72	157	-20.11
circRNA23863	chr2	68490191	68578003	+	10	circRNA	ENST00000445692	APLF	mRNA	chr2:68467827-68490190	aprataxin and PNKP like factor [Source:HGNC Symbol;Acc:HGNC:28724]	GO:0000012(single strand break repair);GO:0000166(nucleotide binding);GO:0003906(DNA-(apurinic or apyrimidinic site) endonuclease activity);GO:0004520(endodeoxyribonuclease activity);GO:0004930(G protein-coupled receptor activity);GO:0004983(neuropeptide Y receptor activity);GO:0005515(protein binding);GO:0005634(nucleus);GO:0005654(nucleoplasm);GO:0005694(chromosome);GO:0005737(cytoplasm);GO:000…	NA	EC:4.2.99.18	hsa-miR-105-5p	8mer	-0.37825	96	154	-14.9
ciRNA2788	chr2	68490190	68515736	+	1	ciRNA	ENST00000529851	APLF	mRNA	chr2:68490189-68515736	aprataxin and PNKP like factor [Source:HGNC Symbol;Acc:HGNC:28724]	GO:0000012(single strand break repair);GO:0000166(nucleotide binding);GO:0003906(DNA-(apurinic or apyrimidinic site) endonuclease activity);GO:0004520(endodeoxyribonuclease activity);GO:0004930(G protein-coupled receptor activity);GO:0004983(neuropeptide Y receptor activity);GO:0005515(protein binding);GO:0005634(nucleus);GO:0005654(nucleoplasm);GO:0005694(chromosome);GO:0005737(cytoplasm);GO:000…	NA	EC:4.2.99.18	hsa-miR-106a-3p	8mer	-0.18315	80	152	-14.97
circRNA23863	chr2	68490191	68578003	+	10	circRNA	ENST00000445692	APLF	mRNA	chr2:68467827-68490190	aprataxin and PNKP like factor [Source:HGNC Symbol;Acc:HGNC:28724]	GO:0000012(single strand break repair);GO:0000166(nucleotide binding);GO:0003906(DNA-(apurinic or apyrimidinic site) endonuclease activity);GO:0004520(endodeoxyribonuclease activity);GO:0004930(G protein-coupled receptor activity);GO:0004983(neuropeptide Y receptor activity);GO:0005515(protein binding);GO:0005634(nucleus);GO:0005654(nucleoplasm);GO:0005694(chromosome);GO:0005737(cytoplasm);GO:000…	NA	EC:4.2.99.18	hsa-miR-106a-3p	m8	-0.243	90	160	-11.69
ciRNA2788	chr2	68490190	68515736	+	1	ciRNA	ENST00000529851	APLF	mRNA	chr2:68490189-68515736	aprataxin and PNKP like factor [Source:HGNC Symbol;Acc:HGNC:28724]	GO:0000012(single strand break repair);GO:0000166(nucleotide binding);GO:0003906(DNA-(apurinic or apyrimidinic site) endonuclease activity);GO:0004520(endodeoxyribonuclease activity);GO:0004930(G protein-coupled receptor activity);GO:0004983(neuropeptide Y receptor activity);GO:0005515(protein binding);GO:0005634(nucleus);GO:0005654(nucleoplasm);GO:0005694(chromosome);GO:0005737(cytoplasm);GO:000…	NA	EC:4.2.99.18	hsa-miR-106a-5p	1a	-0.1004	61	165	-20.08
ciRNA2788	chr2	68490190	68515736	+	1	ciRNA	ENST00000529851	APLF	mRNA	chr2:68490189-68515736	aprataxin and PNKP like factor [Source:HGNC Symbol;Acc:HGNC:28724]	GO:0000012(single strand break repair);GO:0000166(nucleotide binding);GO:0003906(DNA-(apurinic or apyrimidinic site) endonuclease activity);GO:0004520(endodeoxyribonuclease activity);GO:0004930(G protein-coupled receptor activity);GO:0004983(neuropeptide Y receptor activity);GO:0005515(protein binding);GO:0005634(nucleus);GO:0005654(nucleoplasm);GO:0005694(chromosome);GO:0005737(cytoplasm);GO:000…	NA	EC:4.2.99.18	hsa-miR-107	8mer	-0.20825	83	148	-12.53
ciRNA2788	chr2	68490190	68515736	+	1	ciRNA	ENST00000529851	APLF	mRNA	chr2:68490189-68515736	aprataxin and PNKP like factor [Source:HGNC Symbol;Acc:HGNC:28724]	GO:0000012(single strand break repair);GO:0000166(nucleotide binding);GO:0003906(DNA-(apurinic or apyrimidinic site) endonuclease activity);GO:0004520(endodeoxyribonuclease activity);GO:0004930(G protein-coupled receptor activity);GO:0004983(neuropeptide Y receptor activity);GO:0005515(protein binding);GO:0005634(nucleus);GO:0005654(nucleoplasm);GO:0005694(chromosome);GO:0005737(cytoplasm);GO:000…	NA	EC:4.2.99.18	hsa-miR-10a-3p	m8	-0.1965	94	150	-17.25
circRNA23863	chr2	68490191	68578003	+	10	circRNA	ENST00000445692	APLF	mRNA	chr2:68467827-68490190	aprataxin and PNKP like factor [Source:HGNC Symbol;Acc:HGNC:28724]	GO:0000012(single strand break repair);GO:0000166(nucleotide binding);GO:0003906(DNA-(apurinic or apyrimidinic site) endonuclease activity);GO:0004520(endodeoxyribonuclease activity);GO:0004930(G protein-coupled receptor activity);GO:0004983(neuropeptide Y receptor activity);GO:0005515(protein binding);GO:0005634(nucleus);GO:0005654(nucleoplasm);GO:0005694(chromosome);GO:0005737(cytoplasm);GO:000…	NA	EC:4.2.99.18	hsa-miR-122-3p	m8	-0.1745	84	155	-15.24
ciRNA2788	chr2	68490190	68515736	+	1	ciRNA	ENST00000529851	APLF	mRNA	chr2:68490189-68515736	aprataxin and PNKP like factor [Source:HGNC Symbol;Acc:HGNC:28724]	GO:0000012(single strand break repair);GO:0000166(nucleotide binding);GO:0003906(DNA-(apurinic or apyrimidinic site) endonuclease activity);GO:0004520(endodeoxyribonuclease activity);GO:0004930(G protein-coupled receptor activity);GO:0004983(neuropeptide Y receptor activity);GO:0005515(protein binding);GO:0005634(nucleus);GO:0005654(nucleoplasm);GO:0005694(chromosome);GO:0005737(cytoplasm);GO:000…	NA	EC:4.2.99.18	hsa-miR-124-3p	m8	-0.1505	68	146	-14.51
ciRNA2788	chr2	68490190	68515736	+	1	ciRNA	ENST00000529851	APLF	mRNA	chr2:68490189-68515736	aprataxin and PNKP like factor [Source:HGNC Symbol;Acc:HGNC:28724]	GO:0000012(single strand break repair);GO:0000166(nucleotide binding);GO:0003906(DNA-(apurinic or apyrimidinic site) endonuclease activity);GO:0004520(endodeoxyribonuclease activity);GO:0004930(G protein-coupled receptor activity);GO:0004983(neuropeptide Y receptor activity);GO:0005515(protein binding);GO:0005634(nucleus);GO:0005654(nucleoplasm);GO:0005694(chromosome);GO:0005737(cytoplasm);GO:000…	NA	EC:4.2.99.18	hsa-miR-125b-5p	8mer	-0.1653	78	160	-19.11
ciRNA2788	chr2	68490190	68515736	+	1	ciRNA	ENST00000529851	APLF	mRNA	chr2:68490189-68515736	aprataxin and PNKP like factor [Source:HGNC Symbol;Acc:HGNC:28724]	GO:0000012(single strand break repair);GO:0000166(nucleotide binding);GO:0003906(DNA-(apurinic or apyrimidinic site) endonuclease activity);GO:0004520(endodeoxyribonuclease activity);GO:0004930(G protein-coupled receptor activity);GO:0004983(neuropeptide Y receptor activity);GO:0005515(protein binding);GO:0005634(nucleus);GO:0005654(nucleoplasm);GO:0005694(chromosome);GO:0005737(cytoplasm);GO:000…	NA	EC:4.2.99.18	hsa-miR-128-3p	1a	-0.16675	78	145	-19
ciRNA2788	chr2	68490190	68515736	+	1	ciRNA	ENST00000529851	APLF	mRNA	chr2:68490189-68515736	aprataxin and PNKP like factor [Source:HGNC Symbol;Acc:HGNC:28724]	GO:0000012(single strand break repair);GO:0000166(nucleotide binding);GO:0003906(DNA-(apurinic or apyrimidinic site) endonuclease activity);GO:0004520(endodeoxyribonuclease activity);GO:0004930(G protein-coupled receptor activity);GO:0004983(neuropeptide Y receptor activity);GO:0005515(protein binding);GO:0005634(nucleus);GO:0005654(nucleoplasm);GO:0005694(chromosome);GO:0005737(cytoplasm);GO:000…	NA	EC:4.2.99.18	hsa-miR-129-1-3p	8mer	-0.2052	85	148	-15.92
ciRNA2788	chr2	68490190	68515736	+	1	ciRNA	ENST00000529851	APLF	mRNA	chr2:68490189-68515736	aprataxin and PNKP like factor [Source:HGNC Symbol;Acc:HGNC:28724]	GO:0000012(single strand break repair);GO:0000166(nucleotide binding);GO:0003906(DNA-(apurinic or apyrimidinic site) endonuclease activity);GO:0004520(endodeoxyribonuclease activity);GO:0004930(G protein-coupled receptor activity);GO:0004983(neuropeptide Y receptor activity);GO:0005515(protein binding);GO:0005634(nucleus);GO:0005654(nucleoplasm);GO:0005694(chromosome);GO:0005737(cytoplasm);GO:000…	NA	EC:4.2.99.18	hsa-miR-129-5p	m8	-0.125	66	154	-10.89
circRNA23863	chr2	68490191	68578003	+	10	circRNA	ENST00000445692	APLF	mRNA	chr2:68467827-68490190	aprataxin and PNKP like factor [Source:HGNC Symbol;Acc:HGNC:28724]	GO:0000012(single strand break repair);GO:0000166(nucleotide binding);GO:0003906(DNA-(apurinic or apyrimidinic site) endonuclease activity);GO:0004520(endodeoxyribonuclease activity);GO:0004930(G protein-coupled receptor activity);GO:0004983(neuropeptide Y receptor activity);GO:0005515(protein binding);GO:0005634(nucleus);GO:0005654(nucleoplasm);GO:0005694(chromosome);GO:0005737(cytoplasm);GO:000…	NA	EC:4.2.99.18	hsa-miR-129-5p	m8	-0.178	83	155	-18.48
ciRNA2788	chr2	68490190	68515736	+	1	ciRNA	ENST00000529851	APLF	mRNA	chr2:68490189-68515736	aprataxin and PNKP like factor [Source:HGNC Symbol;Acc:HGNC:28724]	GO:0000012(single strand break repair);GO:0000166(nucleotide binding);GO:0003906(DNA-(apurinic or apyrimidinic site) endonuclease activity);GO:0004520(endodeoxyribonuclease activity);GO:0004930(G protein-coupled receptor activity);GO:0004983(neuropeptide Y receptor activity);GO:0005515(protein binding);GO:0005634(nucleus);GO:0005654(nucleoplasm);GO:0005694(chromosome);GO:0005737(cytoplasm);GO:000…	NA	EC:4.2.99.18	hsa-miR-130a-3p	m8	-0.103	51	155	-24.59
ciRNA2788	chr2	68490190	68515736	+	1	ciRNA	ENST00000529851	APLF	mRNA	chr2:68490189-68515736	aprataxin and PNKP like factor [Source:HGNC Symbol;Acc:HGNC:28724]	GO:0000012(single strand break repair);GO:0000166(nucleotide binding);GO:0003906(DNA-(apurinic or apyrimidinic site) endonuclease activity);GO:0004520(endodeoxyribonuclease activity);GO:0004930(G protein-coupled receptor activity);GO:0004983(neuropeptide Y receptor activity);GO:0005515(protein binding);GO:0005634(nucleus);GO:0005654(nucleoplasm);GO:0005694(chromosome);GO:0005737(cytoplasm);GO:000…	NA	EC:4.2.99.18	hsa-miR-130a-5p	m8	-0.2655	88	154	-14.56
ciRNA2788	chr2	68490190	68515736	+	1	ciRNA	ENST00000529851	APLF	mRNA	chr2:68490189-68515736	aprataxin and PNKP like factor [Source:HGNC Symbol;Acc:HGNC:28724]	GO:0000012(single strand break repair);GO:0000166(nucleotide binding);GO:0003906(DNA-(apurinic or apyrimidinic site) endonuclease activity);GO:0004520(endodeoxyribonuclease activity);GO:0004930(G protein-coupled receptor activity);GO:0004983(neuropeptide Y receptor activity);GO:0005515(protein binding);GO:0005634(nucleus);GO:0005654(nucleoplasm);GO:0005694(chromosome);GO:0005737(cytoplasm);GO:000…	NA	EC:4.2.99.18	hsa-miR-133a-3p	1a	-0.14185	60	144	-10.58
ciRNA2788	chr2	68490190	68515736	+	1	ciRNA	ENST00000529851	APLF	mRNA	chr2:68490189-68515736	aprataxin and PNKP like factor [Source:HGNC Symbol;Acc:HGNC:28724]	GO:0000012(single strand break repair);GO:0000166(nucleotide binding);GO:0003906(DNA-(apurinic or apyrimidinic site) endonuclease activity);GO:0004520(endodeoxyribonuclease activity);GO:0004930(G protein-coupled receptor activity);GO:0004983(neuropeptide Y receptor activity);GO:0005515(protein binding);GO:0005634(nucleus);GO:0005654(nucleoplasm);GO:0005694(chromosome);GO:0005737(cytoplasm);GO:000…	NA	EC:4.2.99.18	hsa-miR-133a-5p	8mer	-0.13625	69	145	-16.1
circRNA23863	chr2	68490191	68578003	+	10	circRNA	ENST00000445692	APLF	mRNA	chr2:68467827-68490190	aprataxin and PNKP like factor [Source:HGNC Symbol;Acc:HGNC:28724]	GO:0000012(single strand break repair);GO:0000166(nucleotide binding);GO:0003906(DNA-(apurinic or apyrimidinic site) endonuclease activity);GO:0004520(endodeoxyribonuclease activity);GO:0004930(G protein-coupled receptor activity);GO:0004983(neuropeptide Y receptor activity);GO:0005515(protein binding);GO:0005634(nucleus);GO:0005654(nucleoplasm);GO:0005694(chromosome);GO:0005737(cytoplasm);GO:000…	NA	EC:4.2.99.18	hsa-miR-133a-5p	8mer	-0.30225	94	145	-16.1
ciRNA2788	chr2	68490190	68515736	+	1	ciRNA	ENST00000529851	APLF	mRNA	chr2:68490189-68515736	aprataxin and PNKP like factor [Source:HGNC Symbol;Acc:HGNC:28724]	GO:0000012(single strand break repair);GO:0000166(nucleotide binding);GO:0003906(DNA-(apurinic or apyrimidinic site) endonuclease activity);GO:0004520(endodeoxyribonuclease activity);GO:0004930(G protein-coupled receptor activity);GO:0004983(neuropeptide Y receptor activity);GO:0005515(protein binding);GO:0005634(nucleus);GO:0005654(nucleoplasm);GO:0005694(chromosome);GO:0005737(cytoplasm);GO:000…	NA	EC:4.2.99.18	hsa-miR-135a-2-3p	1a	-0.1443	64	150	-22.47
ciRNA2788	chr2	68490190	68515736	+	1	ciRNA	ENST00000529851	APLF	mRNA	chr2:68490189-68515736	aprataxin and PNKP like factor [Source:HGNC Symbol;Acc:HGNC:28724]	GO:0000012(single strand break repair);GO:0000166(nucleotide binding);GO:0003906(DNA-(apurinic or apyrimidinic site) endonuclease activity);GO:0004520(endodeoxyribonuclease activity);GO:0004930(G protein-coupled receptor activity);GO:0004983(neuropeptide Y receptor activity);GO:0005515(protein binding);GO:0005634(nucleus);GO:0005654(nucleoplasm);GO:0005694(chromosome);GO:0005737(cytoplasm);GO:000…	NA	EC:4.2.99.18	hsa-miR-135a-3p	m8	-0.155	70	151	-21.24
circRNA23863	chr2	68490191	68578003	+	10	circRNA	ENST00000445692	APLF	mRNA	chr2:68467827-68490190	aprataxin and PNKP like factor [Source:HGNC Symbol;Acc:HGNC:28724]	GO:0000012(single strand break repair);GO:0000166(nucleotide binding);GO:0003906(DNA-(apurinic or apyrimidinic site) endonuclease activity);GO:0004520(endodeoxyribonuclease activity);GO:0004930(G protein-coupled receptor activity);GO:0004983(neuropeptide Y receptor activity);GO:0005515(protein binding);GO:0005634(nucleus);GO:0005654(nucleoplasm);GO:0005694(chromosome);GO:0005737(cytoplasm);GO:000…	NA	EC:4.2.99.18	hsa-miR-135a-3p	1a	-0.1242	56	152	-22.07
circRNA23863	chr2	68490191	68578003	+	10	circRNA	ENST00000445692	APLF	mRNA	chr2:68467827-68490190	aprataxin and PNKP like factor [Source:HGNC Symbol;Acc:HGNC:28724]	GO:0000012(single strand break repair);GO:0000166(nucleotide binding);GO:0003906(DNA-(apurinic or apyrimidinic site) endonuclease activity);GO:0004520(endodeoxyribonuclease activity);GO:0004930(G protein-coupled receptor activity);GO:0004983(neuropeptide Y receptor activity);GO:0005515(protein binding);GO:0005634(nucleus);GO:0005654(nucleoplasm);GO:0005694(chromosome);GO:0005737(cytoplasm);GO:000…	NA	EC:4.2.99.18	hsa-miR-135a-5p	8mer	-0.2512	89	163	-12.71
ciRNA2788	chr2	68490190	68515736	+	1	ciRNA	ENST00000529851	APLF	mRNA	chr2:68490189-68515736	aprataxin and PNKP like factor [Source:HGNC Symbol;Acc:HGNC:28724]	GO:0000012(single strand break repair);GO:0000166(nucleotide binding);GO:0003906(DNA-(apurinic or apyrimidinic site) endonuclease activity);GO:0004520(endodeoxyribonuclease activity);GO:0004930(G protein-coupled receptor activity);GO:0004983(neuropeptide Y receptor activity);GO:0005515(protein binding);GO:0005634(nucleus);GO:0005654(nucleoplasm);GO:0005694(chromosome);GO:0005737(cytoplasm);GO:000…	NA	EC:4.2.99.18	hsa-miR-139-5p	m8	-0.201	84	145	-17.07
ciRNA2788	chr2	68490190	68515736	+	1	ciRNA	ENST00000529851	APLF	mRNA	chr2:68490189-68515736	aprataxin and PNKP like factor [Source:HGNC Symbol;Acc:HGNC:28724]	GO:0000012(single strand break repair);GO:0000166(nucleotide binding);GO:0003906(DNA-(apurinic or apyrimidinic site) endonuclease activity);GO:0004520(endodeoxyribonuclease activity);GO:0004930(G protein-coupled receptor activity);GO:0004983(neuropeptide Y receptor activity);GO:0005515(protein binding);GO:0005634(nucleus);GO:0005654(nucleoplasm);GO:0005694(chromosome);GO:0005737(cytoplasm);GO:000…	NA	EC:4.2.99.18	hsa-miR-1-3p	m8	-0.1075	50	140	-17.29
ciRNA2788	chr2	68490190	68515736	+	1	ciRNA	ENST00000529851	APLF	mRNA	chr2:68490189-68515736	aprataxin and PNKP like factor [Source:HGNC Symbol;Acc:HGNC:28724]	GO:0000012(single strand break repair);GO:0000166(nucleotide binding);GO:0003906(DNA-(apurinic or apyrimidinic site) endonuclease activity);GO:0004520(endodeoxyribonuclease activity);GO:0004930(G protein-coupled receptor activity);GO:0004983(neuropeptide Y receptor activity);GO:0005515(protein binding);GO:0005634(nucleus);GO:0005654(nucleoplasm);GO:0005694(chromosome);GO:0005737(cytoplasm);GO:000…	NA	EC:4.2.99.18	hsa-miR-147a	m8	-0.097	51	154	-21.38
circRNA23863	chr2	68490191	68578003	+	10	circRNA	ENST00000445692	APLF	mRNA	chr2:68467827-68490190	aprataxin and PNKP like factor [Source:HGNC Symbol;Acc:HGNC:28724]	GO:0000012(single strand break repair);GO:0000166(nucleotide binding);GO:0003906(DNA-(apurinic or apyrimidinic site) endonuclease activity);GO:0004520(endodeoxyribonuclease activity);GO:0004930(G protein-coupled receptor activity);GO:0004983(neuropeptide Y receptor activity);GO:0005515(protein binding);GO:0005634(nucleus);GO:0005654(nucleoplasm);GO:0005694(chromosome);GO:0005737(cytoplasm);GO:000…	NA	EC:4.2.99.18	hsa-miR-147a	1a	-0.1242	63	156	-18.8
ciRNA2788	chr2	68490190	68515736	+	1	ciRNA	ENST00000529851	APLF	mRNA	chr2:68490189-68515736	aprataxin and PNKP like factor [Source:HGNC Symbol;Acc:HGNC:28724]	GO:0000012(single strand break repair);GO:0000166(nucleotide binding);GO:0003906(DNA-(apurinic or apyrimidinic site) endonuclease activity);GO:0004520(endodeoxyribonuclease activity);GO:0004930(G protein-coupled receptor activity);GO:0004983(neuropeptide Y receptor activity);GO:0005515(protein binding);GO:0005634(nucleus);GO:0005654(nucleoplasm);GO:0005694(chromosome);GO:0005737(cytoplasm);GO:000…	NA	EC:4.2.99.18	hsa-miR-148a-5p	m8	-0.177	67	152	-13.62
ciRNA2788	chr2	68490190	68515736	+	1	ciRNA	ENST00000529851	APLF	mRNA	chr2:68490189-68515736	aprataxin and PNKP like factor [Source:HGNC Symbol;Acc:HGNC:28724]	GO:0000012(single strand break repair);GO:0000166(nucleotide binding);GO:0003906(DNA-(apurinic or apyrimidinic site) endonuclease activity);GO:0004520(endodeoxyribonuclease activity);GO:0004930(G protein-coupled receptor activity);GO:0004983(neuropeptide Y receptor activity);GO:0005515(protein binding);GO:0005634(nucleus);GO:0005654(nucleoplasm);GO:0005694(chromosome);GO:0005737(cytoplasm);GO:000…	NA	EC:4.2.99.18	hsa-miR-15a-3p	8mer	-0.17615	82	142	-19.09
ciRNA2788	chr2	68490190	68515736	+	1	ciRNA	ENST00000529851	APLF	mRNA	chr2:68490189-68515736	aprataxin and PNKP like factor [Source:HGNC Symbol;Acc:HGNC:28724]	GO:0000012(single strand break repair);GO:0000166(nucleotide binding);GO:0003906(DNA-(apurinic or apyrimidinic site) endonuclease activity);GO:0004520(endodeoxyribonuclease activity);GO:0004930(G protein-coupled receptor activity);GO:0004983(neuropeptide Y receptor activity);GO:0005515(protein binding);GO:0005634(nucleus);GO:0005654(nucleoplasm);GO:0005694(chromosome);GO:0005737(cytoplasm);GO:000…	NA	EC:4.2.99.18	hsa-miR-15a-5p	8mer	-0.2222	84	155	-24.7
ciRNA2788	chr2	68490190	68515736	+	1	ciRNA	ENST00000529851	APLF	mRNA	chr2:68490189-68515736	aprataxin and PNKP like factor [Source:HGNC Symbol;Acc:HGNC:28724]	GO:0000012(single strand break repair);GO:0000166(nucleotide binding);GO:0003906(DNA-(apurinic or apyrimidinic site) endonuclease activity);GO:0004520(endodeoxyribonuclease activity);GO:0004930(G protein-coupled receptor activity);GO:0004983(neuropeptide Y receptor activity);GO:0005515(protein binding);GO:0005634(nucleus);GO:0005654(nucleoplasm);GO:0005694(chromosome);GO:0005737(cytoplasm);GO:000…	NA	EC:4.2.99.18	hsa-miR-15b-5p	8mer	-0.2222	84	151	-23.64
circRNA23863	chr2	68490191	68578003	+	10	circRNA	ENST00000445692	APLF	mRNA	chr2:68467827-68490190	aprataxin and PNKP like factor [Source:HGNC Symbol;Acc:HGNC:28724]	GO:0000012(single strand break repair);GO:0000166(nucleotide binding);GO:0003906(DNA-(apurinic or apyrimidinic site) endonuclease activity);GO:0004520(endodeoxyribonuclease activity);GO:0004930(G protein-coupled receptor activity);GO:0004983(neuropeptide Y receptor activity);GO:0005515(protein binding);GO:0005634(nucleus);GO:0005654(nucleoplasm);GO:0005694(chromosome);GO:0005737(cytoplasm);GO:000…	NA	EC:4.2.99.18	hsa-miR-16-1-3p	8mer	-0.32525	94	148	-11.34
ciRNA2788	chr2	68490190	68515736	+	1	ciRNA	ENST00000529851	APLF	mRNA	chr2:68490189-68515736	aprataxin and PNKP like factor [Source:HGNC Symbol;Acc:HGNC:28724]	GO:0000012(single strand break repair);GO:0000166(nucleotide binding);GO:0003906(DNA-(apurinic or apyrimidinic site) endonuclease activity);GO:0004520(endodeoxyribonuclease activity);GO:0004930(G protein-coupled receptor activity);GO:0004983(neuropeptide Y receptor activity);GO:0005515(protein binding);GO:0005634(nucleus);GO:0005654(nucleoplasm);GO:0005694(chromosome);GO:0005737(cytoplasm);GO:000…	NA	EC:4.2.99.18	hsa-miR-16-2-3p	m8	-0.144	58	151	-10.44
ciRNA2788	chr2	68490190	68515736	+	1	ciRNA	ENST00000529851	APLF	mRNA	chr2:68490189-68515736	aprataxin and PNKP like factor [Source:HGNC Symbol;Acc:HGNC:28724]	GO:0000012(single strand break repair);GO:0000166(nucleotide binding);GO:0003906(DNA-(apurinic or apyrimidinic site) endonuclease activity);GO:0004520(endodeoxyribonuclease activity);GO:0004930(G protein-coupled receptor activity);GO:0004983(neuropeptide Y receptor activity);GO:0005515(protein binding);GO:0005634(nucleus);GO:0005654(nucleoplasm);GO:0005694(chromosome);GO:0005737(cytoplasm);GO:000…	NA	EC:4.2.99.18	hsa-miR-16-5p	8mer	-0.2304	85	149	-14.41
ciRNA2788	chr2	68490190	68515736	+	1	ciRNA	ENST00000529851	APLF	mRNA	chr2:68490189-68515736	aprataxin and PNKP like factor [Source:HGNC Symbol;Acc:HGNC:28724]	GO:0000012(single strand break repair);GO:0000166(nucleotide binding);GO:0003906(DNA-(apurinic or apyrimidinic site) endonuclease activity);GO:0004520(endodeoxyribonuclease activity);GO:0004930(G protein-coupled receptor activity);GO:0004983(neuropeptide Y receptor activity);GO:0005515(protein binding);GO:0005634(nucleus);GO:0005654(nucleoplasm);GO:0005694(chromosome);GO:0005737(cytoplasm);GO:000…	NA	EC:4.2.99.18	hsa-miR-17-3p	8mer	-0.1582	75	152	-19.55
ciRNA2788	chr2	68490190	68515736	+	1	ciRNA	ENST00000529851	APLF	mRNA	chr2:68490189-68515736	aprataxin and PNKP like factor [Source:HGNC Symbol;Acc:HGNC:28724]	GO:0000012(single strand break repair);GO:0000166(nucleotide binding);GO:0003906(DNA-(apurinic or apyrimidinic site) endonuclease activity);GO:0004520(endodeoxyribonuclease activity);GO:0004930(G protein-coupled receptor activity);GO:0004983(neuropeptide Y receptor activity);GO:0005515(protein binding);GO:0005634(nucleus);GO:0005654(nucleoplasm);GO:0005694(chromosome);GO:0005737(cytoplasm);GO:000…	NA	EC:4.2.99.18	hsa-miR-17-5p	1a	-0.1004	61	165	-24.32
ciRNA2788	chr2	68490190	68515736	+	1	ciRNA	ENST00000529851	APLF	mRNA	chr2:68490189-68515736	aprataxin and PNKP like factor [Source:HGNC Symbol;Acc:HGNC:28724]	GO:0000012(single strand break repair);GO:0000166(nucleotide binding);GO:0003906(DNA-(apurinic or apyrimidinic site) endonuclease activity);GO:0004520(endodeoxyribonuclease activity);GO:0004930(G protein-coupled receptor activity);GO:0004983(neuropeptide Y receptor activity);GO:0005515(protein binding);GO:0005634(nucleus);GO:0005654(nucleoplasm);GO:0005694(chromosome);GO:0005737(cytoplasm);GO:000…	NA	EC:4.2.99.18	hsa-miR-181a-2-3p	8mer	-0.1713	75	159	-20.24
circRNA23863	chr2	68490191	68578003	+	10	circRNA	ENST00000445692	APLF	mRNA	chr2:68467827-68490190	aprataxin and PNKP like factor [Source:HGNC Symbol;Acc:HGNC:28724]	GO:0000012(single strand break repair);GO:0000166(nucleotide binding);GO:0003906(DNA-(apurinic or apyrimidinic site) endonuclease activity);GO:0004520(endodeoxyribonuclease activity);GO:0004930(G protein-coupled receptor activity);GO:0004983(neuropeptide Y receptor activity);GO:0005515(protein binding);GO:0005634(nucleus);GO:0005654(nucleoplasm);GO:0005694(chromosome);GO:0005737(cytoplasm);GO:000…	NA	EC:4.2.99.18	hsa-miR-181a-2-3p	8mer	-0.3413	94	159	-20.24
ciRNA2788	chr2	68490190	68515736	+	1	ciRNA	ENST00000529851	APLF	mRNA	chr2:68490189-68515736	aprataxin and PNKP like factor [Source:HGNC Symbol;Acc:HGNC:28724]	GO:0000012(single strand break repair);GO:0000166(nucleotide binding);GO:0003906(DNA-(apurinic or apyrimidinic site) endonuclease activity);GO:0004520(endodeoxyribonuclease activity);GO:0004930(G protein-coupled receptor activity);GO:0004983(neuropeptide Y receptor activity);GO:0005515(protein binding);GO:0005634(nucleus);GO:0005654(nucleoplasm);GO:0005694(chromosome);GO:0005737(cytoplasm);GO:000…	NA	EC:4.2.99.18	hsa-miR-181a-5p	m8	-0.211	83	156	-15.52
circRNA23863	chr2	68490191	68578003	+	10	circRNA	ENST00000445692	APLF	mRNA	chr2:68467827-68490190	aprataxin and PNKP like factor [Source:HGNC Symbol;Acc:HGNC:28724]	GO:0000012(single strand break repair);GO:0000166(nucleotide binding);GO:0003906(DNA-(apurinic or apyrimidinic site) endonuclease activity);GO:0004520(endodeoxyribonuclease activity);GO:0004930(G protein-coupled receptor activity);GO:0004983(neuropeptide Y receptor activity);GO:0005515(protein binding);GO:0005634(nucleus);GO:0005654(nucleoplasm);GO:0005694(chromosome);GO:0005737(cytoplasm);GO:000…	NA	EC:4.2.99.18	hsa-miR-181a-5p	1a	-0.1873	77	149	-17.11
ciRNA2788	chr2	68490190	68515736	+	1	ciRNA	ENST00000529851	APLF	mRNA	chr2:68490189-68515736	aprataxin and PNKP like factor [Source:HGNC Symbol;Acc:HGNC:28724]	GO:0000012(single strand break repair);GO:0000166(nucleotide binding);GO:0003906(DNA-(apurinic or apyrimidinic site) endonuclease activity);GO:0004520(endodeoxyribonuclease activity);GO:0004930(G protein-coupled receptor activity);GO:0004983(neuropeptide Y receptor activity);GO:0005515(protein binding);GO:0005634(nucleus);GO:0005654(nucleoplasm);GO:0005694(chromosome);GO:0005737(cytoplasm);GO:000…	NA	EC:4.2.99.18	hsa-miR-181b-3p	8mer	-0.186	77	155	-14.47
ciRNA2788	chr2	68490190	68515736	+	1	ciRNA	ENST00000529851	APLF	mRNA	chr2:68490189-68515736	aprataxin and PNKP like factor [Source:HGNC Symbol;Acc:HGNC:28724]	GO:0000012(single strand break repair);GO:0000166(nucleotide binding);GO:0003906(DNA-(apurinic or apyrimidinic site) endonuclease activity);GO:0004520(endodeoxyribonuclease activity);GO:0004930(G protein-coupled receptor activity);GO:0004983(neuropeptide Y receptor activity);GO:0005515(protein binding);GO:0005634(nucleus);GO:0005654(nucleoplasm);GO:0005694(chromosome);GO:0005737(cytoplasm);GO:000…	NA	EC:4.2.99.18	hsa-miR-181b-5p	m8	-0.211	83	152	-21.56
circRNA23863	chr2	68490191	68578003	+	10	circRNA	ENST00000445692	APLF	mRNA	chr2:68467827-68490190	aprataxin and PNKP like factor [Source:HGNC Symbol;Acc:HGNC:28724]	GO:0000012(single strand break repair);GO:0000166(nucleotide binding);GO:0003906(DNA-(apurinic or apyrimidinic site) endonuclease activity);GO:0004520(endodeoxyribonuclease activity);GO:0004930(G protein-coupled receptor activity);GO:0004983(neuropeptide Y receptor activity);GO:0005515(protein binding);GO:0005634(nucleus);GO:0005654(nucleoplasm);GO:0005694(chromosome);GO:0005737(cytoplasm);GO:000…	NA	EC:4.2.99.18	hsa-miR-181b-5p	1a	-0.1873	77	153	-16.78
ciRNA2788	chr2	68490190	68515736	+	1	ciRNA	ENST00000529851	APLF	mRNA	chr2:68490189-68515736	aprataxin and PNKP like factor [Source:HGNC Symbol;Acc:HGNC:28724]	GO:0000012(single strand break repair);GO:0000166(nucleotide binding);GO:0003906(DNA-(apurinic or apyrimidinic site) endonuclease activity);GO:0004520(endodeoxyribonuclease activity);GO:0004930(G protein-coupled receptor activity);GO:0004983(neuropeptide Y receptor activity);GO:0005515(protein binding);GO:0005634(nucleus);GO:0005654(nucleoplasm);GO:0005694(chromosome);GO:0005737(cytoplasm);GO:000…	NA	EC:4.2.99.18	hsa-miR-181c-5p	m8	-0.211	83	155	-17.73
circRNA23863	chr2	68490191	68578003	+	10	circRNA	ENST00000445692	APLF	mRNA	chr2:68467827-68490190	aprataxin and PNKP like factor [Source:HGNC Symbol;Acc:HGNC:28724]	GO:0000012(single strand break repair);GO:0000166(nucleotide binding);GO:0003906(DNA-(apurinic or apyrimidinic site) endonuclease activity);GO:0004520(endodeoxyribonuclease activity);GO:0004930(G protein-coupled receptor activity);GO:0004983(neuropeptide Y receptor activity);GO:0005515(protein binding);GO:0005634(nucleus);GO:0005654(nucleoplasm);GO:0005694(chromosome);GO:0005737(cytoplasm);GO:000…	NA	EC:4.2.99.18	hsa-miR-181c-5p	1a	-0.1662	71	151	-17.63
ciRNA2788	chr2	68490190	68515736	+	1	ciRNA	ENST00000529851	APLF	mRNA	chr2:68490189-68515736	aprataxin and PNKP like factor [Source:HGNC Symbol;Acc:HGNC:28724]	GO:0000012(single strand break repair);GO:0000166(nucleotide binding);GO:0003906(DNA-(apurinic or apyrimidinic site) endonuclease activity);GO:0004520(endodeoxyribonuclease activity);GO:0004930(G protein-coupled receptor activity);GO:0004983(neuropeptide Y receptor activity);GO:0005515(protein binding);GO:0005634(nucleus);GO:0005654(nucleoplasm);GO:0005694(chromosome);GO:0005737(cytoplasm);GO:000…	NA	EC:4.2.99.18	hsa-miR-182-5p	m8	-0.1335	55	155	-24.93
ciRNA2788	chr2	68490190	68515736	+	1	ciRNA	ENST00000529851	APLF	mRNA	chr2:68490189-68515736	aprataxin and PNKP like factor [Source:HGNC Symbol;Acc:HGNC:28724]	GO:0000012(single strand break repair);GO:0000166(nucleotide binding);GO:0003906(DNA-(apurinic or apyrimidinic site) endonuclease activity);GO:0004520(endodeoxyribonuclease activity);GO:0004930(G protein-coupled receptor activity);GO:0004983(neuropeptide Y receptor activity);GO:0005515(protein binding);GO:0005634(nucleus);GO:0005654(nucleoplasm);GO:0005694(chromosome);GO:0005737(cytoplasm);GO:000…	NA	EC:4.2.99.18	hsa-miR-183-5p	m8	-0.128	61	152	-20.86
ciRNA2788	chr2	68490190	68515736	+	1	ciRNA	ENST00000529851	APLF	mRNA	chr2:68490189-68515736	aprataxin and PNKP like factor [Source:HGNC Symbol;Acc:HGNC:28724]	GO:0000012(single strand break repair);GO:0000166(nucleotide binding);GO:0003906(DNA-(apurinic or apyrimidinic site) endonuclease activity);GO:0004520(endodeoxyribonuclease activity);GO:0004930(G protein-coupled receptor activity);GO:0004983(neuropeptide Y receptor activity);GO:0005515(protein binding);GO:0005634(nucleus);GO:0005654(nucleoplasm);GO:0005694(chromosome);GO:0005737(cytoplasm);GO:000…	NA	EC:4.2.99.18	hsa-miR-187-3p	8mer	-0.2162	85	150	-25.68
ciRNA2788	chr2	68490190	68515736	+	1	ciRNA	ENST00000529851	APLF	mRNA	chr2:68490189-68515736	aprataxin and PNKP like factor [Source:HGNC Symbol;Acc:HGNC:28724]	GO:0000012(single strand break repair);GO:0000166(nucleotide binding);GO:0003906(DNA-(apurinic or apyrimidinic site) endonuclease activity);GO:0004520(endodeoxyribonuclease activity);GO:0004930(G protein-coupled receptor activity);GO:0004983(neuropeptide Y receptor activity);GO:0005515(protein binding);GO:0005634(nucleus);GO:0005654(nucleoplasm);GO:0005694(chromosome);GO:0005737(cytoplasm);GO:000…	NA	EC:4.2.99.18	hsa-miR-187-5p	8mer	-0.1412	65	143	-11.01
ciRNA2788	chr2	68490190	68515736	+	1	ciRNA	ENST00000529851	APLF	mRNA	chr2:68490189-68515736	aprataxin and PNKP like factor [Source:HGNC Symbol;Acc:HGNC:28724]	GO:0000012(single strand break repair);GO:0000166(nucleotide binding);GO:0003906(DNA-(apurinic or apyrimidinic site) endonuclease activity);GO:0004520(endodeoxyribonuclease activity);GO:0004930(G protein-coupled receptor activity);GO:0004983(neuropeptide Y receptor activity);GO:0005515(protein binding);GO:0005634(nucleus);GO:0005654(nucleoplasm);GO:0005694(chromosome);GO:0005737(cytoplasm);GO:000…	NA	EC:4.2.99.18	hsa-miR-18a-3p	m8	-0.1055	65	153	-26.05
ciRNA2788	chr2	68490190	68515736	+	1	ciRNA	ENST00000529851	APLF	mRNA	chr2:68490189-68515736	aprataxin and PNKP like factor [Source:HGNC Symbol;Acc:HGNC:28724]	GO:0000012(single strand break repair);GO:0000166(nucleotide binding);GO:0003906(DNA-(apurinic or apyrimidinic site) endonuclease activity);GO:0004520(endodeoxyribonuclease activity);GO:0004930(G protein-coupled receptor activity);GO:0004983(neuropeptide Y receptor activity);GO:0005515(protein binding);GO:0005634(nucleus);GO:0005654(nucleoplasm);GO:0005694(chromosome);GO:0005737(cytoplasm);GO:000…	NA	EC:4.2.99.18	hsa-miR-18a-5p	1a	-0.1542	71	141	-18.09
ciRNA2788	chr2	68490190	68515736	+	1	ciRNA	ENST00000529851	APLF	mRNA	chr2:68490189-68515736	aprataxin and PNKP like factor [Source:HGNC Symbol;Acc:HGNC:28724]	GO:0000012(single strand break repair);GO:0000166(nucleotide binding);GO:0003906(DNA-(apurinic or apyrimidinic site) endonuclease activity);GO:0004520(endodeoxyribonuclease activity);GO:0004930(G protein-coupled receptor activity);GO:0004983(neuropeptide Y receptor activity);GO:0005515(protein binding);GO:0005634(nucleus);GO:0005654(nucleoplasm);GO:0005694(chromosome);GO:0005737(cytoplasm);GO:000…	NA	EC:4.2.99.18	hsa-miR-192-3p	m8	-0.2435	89	141	-16.97
ciRNA2788	chr2	68490190	68515736	+	1	ciRNA	ENST00000529851	APLF	mRNA	chr2:68490189-68515736	aprataxin and PNKP like factor [Source:HGNC Symbol;Acc:HGNC:28724]	GO:0000012(single strand break repair);GO:0000166(nucleotide binding);GO:0003906(DNA-(apurinic or apyrimidinic site) endonuclease activity);GO:0004520(endodeoxyribonuclease activity);GO:0004930(G protein-coupled receptor activity);GO:0004983(neuropeptide Y receptor activity);GO:0005515(protein binding);GO:0005634(nucleus);GO:0005654(nucleoplasm);GO:0005694(chromosome);GO:0005737(cytoplasm);GO:000…	NA	EC:4.2.99.18	hsa-miR-192-5p	m8	-0.139	74	152	-17.49
ciRNA2788	chr2	68490190	68515736	+	1	ciRNA	ENST00000529851	APLF	mRNA	chr2:68490189-68515736	aprataxin and PNKP like factor [Source:HGNC Symbol;Acc:HGNC:28724]	GO:0000012(single strand break repair);GO:0000166(nucleotide binding);GO:0003906(DNA-(apurinic or apyrimidinic site) endonuclease activity);GO:0004520(endodeoxyribonuclease activity);GO:0004930(G protein-coupled receptor activity);GO:0004983(neuropeptide Y receptor activity);GO:0005515(protein binding);GO:0005634(nucleus);GO:0005654(nucleoplasm);GO:0005694(chromosome);GO:0005737(cytoplasm);GO:000…	NA	EC:4.2.99.18	hsa-miR-196a-1-3p	8mer	-0.2262	86	153	-12.6
circRNA23863	chr2	68490191	68578003	+	10	circRNA	ENST00000445692	APLF	mRNA	chr2:68467827-68490190	aprataxin and PNKP like factor [Source:HGNC Symbol;Acc:HGNC:28724]	GO:0000012(single strand break repair);GO:0000166(nucleotide binding);GO:0003906(DNA-(apurinic or apyrimidinic site) endonuclease activity);GO:0004520(endodeoxyribonuclease activity);GO:0004930(G protein-coupled receptor activity);GO:0004983(neuropeptide Y receptor activity);GO:0005515(protein binding);GO:0005634(nucleus);GO:0005654(nucleoplasm);GO:0005694(chromosome);GO:0005737(cytoplasm);GO:000…	NA	EC:4.2.99.18	hsa-miR-196a-3p	1a	-0.09175	53	167	-16.85
ciRNA2788	chr2	68490190	68515736	+	1	ciRNA	ENST00000529851	APLF	mRNA	chr2:68490189-68515736	aprataxin and PNKP like factor [Source:HGNC Symbol;Acc:HGNC:28724]	GO:0000012(single strand break repair);GO:0000166(nucleotide binding);GO:0003906(DNA-(apurinic or apyrimidinic site) endonuclease activity);GO:0004520(endodeoxyribonuclease activity);GO:0004930(G protein-coupled receptor activity);GO:0004983(neuropeptide Y receptor activity);GO:0005515(protein binding);GO:0005634(nucleus);GO:0005654(nucleoplasm);GO:0005694(chromosome);GO:0005737(cytoplasm);GO:000…	NA	EC:4.2.99.18	hsa-miR-196a-5p	m8	-0.14	63	154	-21.29
ciRNA2788	chr2	68490190	68515736	+	1	ciRNA	ENST00000529851	APLF	mRNA	chr2:68490189-68515736	aprataxin and PNKP like factor [Source:HGNC Symbol;Acc:HGNC:28724]	GO:0000012(single strand break repair);GO:0000166(nucleotide binding);GO:0003906(DNA-(apurinic or apyrimidinic site) endonuclease activity);GO:0004520(endodeoxyribonuclease activity);GO:0004930(G protein-coupled receptor activity);GO:0004983(neuropeptide Y receptor activity);GO:0005515(protein binding);GO:0005634(nucleus);GO:0005654(nucleoplasm);GO:0005694(chromosome);GO:0005737(cytoplasm);GO:000…	NA	EC:4.2.99.18	hsa-miR-197-3p	8mer	-0.1533	76	156	-22.28
ciRNA2788	chr2	68490190	68515736	+	1	ciRNA	ENST00000529851	APLF	mRNA	chr2:68490189-68515736	aprataxin and PNKP like factor [Source:HGNC Symbol;Acc:HGNC:28724]	GO:0000012(single strand break repair);GO:0000166(nucleotide binding);GO:0003906(DNA-(apurinic or apyrimidinic site) endonuclease activity);GO:0004520(endodeoxyribonuclease activity);GO:0004930(G protein-coupled receptor activity);GO:0004983(neuropeptide Y receptor activity);GO:0005515(protein binding);GO:0005634(nucleus);GO:0005654(nucleoplasm);GO:0005694(chromosome);GO:0005737(cytoplasm);GO:000…	NA	EC:4.2.99.18	hsa-miR-198	8mer	-0.2012	84	155	-27.73
circRNA23863	chr2	68490191	68578003	+	10	circRNA	ENST00000445692	APLF	mRNA	chr2:68467827-68490190	aprataxin and PNKP like factor [Source:HGNC Symbol;Acc:HGNC:28724]	GO:0000012(single strand break repair);GO:0000166(nucleotide binding);GO:0003906(DNA-(apurinic or apyrimidinic site) endonuclease activity);GO:0004520(endodeoxyribonuclease activity);GO:0004930(G protein-coupled receptor activity);GO:0004983(neuropeptide Y receptor activity);GO:0005515(protein binding);GO:0005634(nucleus);GO:0005654(nucleoplasm);GO:0005694(chromosome);GO:0005737(cytoplasm);GO:000…	NA	EC:4.2.99.18	hsa-miR-199a-3p	m8	-0.1385	61	151	-18.47
ciRNA2788	chr2	68490190	68515736	+	1	ciRNA	ENST00000529851	APLF	mRNA	chr2:68490189-68515736	aprataxin and PNKP like factor [Source:HGNC Symbol;Acc:HGNC:28724]	GO:0000012(single strand break repair);GO:0000166(nucleotide binding);GO:0003906(DNA-(apurinic or apyrimidinic site) endonuclease activity);GO:0004520(endodeoxyribonuclease activity);GO:0004930(G protein-coupled receptor activity);GO:0004983(neuropeptide Y receptor activity);GO:0005515(protein binding);GO:0005634(nucleus);GO:0005654(nucleoplasm);GO:0005694(chromosome);GO:0005737(cytoplasm);GO:000…	NA	EC:4.2.99.18	hsa-miR-199a-5p	1a	-0.1112	55	144	-16.06
circRNA23863	chr2	68490191	68578003	+	10	circRNA	ENST00000445692	APLF	mRNA	chr2:68467827-68490190	aprataxin and PNKP like factor [Source:HGNC Symbol;Acc:HGNC:28724]	GO:0000012(single strand break repair);GO:0000166(nucleotide binding);GO:0003906(DNA-(apurinic or apyrimidinic site) endonuclease activity);GO:0004520(endodeoxyribonuclease activity);GO:0004930(G protein-coupled receptor activity);GO:0004983(neuropeptide Y receptor activity);GO:0005515(protein binding);GO:0005634(nucleus);GO:0005654(nucleoplasm);GO:0005694(chromosome);GO:0005737(cytoplasm);GO:000…	NA	EC:4.2.99.18	hsa-miR-199b-3p	m8	-0.1385	61	151	-18.47
ciRNA2788	chr2	68490190	68515736	+	1	ciRNA	ENST00000529851	APLF	mRNA	chr2:68490189-68515736	aprataxin and PNKP like factor [Source:HGNC Symbol;Acc:HGNC:28724]	GO:0000012(single strand break repair);GO:0000166(nucleotide binding);GO:0003906(DNA-(apurinic or apyrimidinic site) endonuclease activity);GO:0004520(endodeoxyribonuclease activity);GO:0004930(G protein-coupled receptor activity);GO:0004983(neuropeptide Y receptor activity);GO:0005515(protein binding);GO:0005634(nucleus);GO:0005654(nucleoplasm);GO:0005694(chromosome);GO:0005737(cytoplasm);GO:000…	NA	EC:4.2.99.18	hsa-miR-199b-5p	1a	-0.12175	59	145	-14.4
circRNA23863	chr2	68490191	68578003	+	10	circRNA	ENST00000445692	APLF	mRNA	chr2:68467827-68490190	aprataxin and PNKP like factor [Source:HGNC Symbol;Acc:HGNC:28724]	GO:0000012(single strand break repair);GO:0000166(nucleotide binding);GO:0003906(DNA-(apurinic or apyrimidinic site) endonuclease activity);GO:0004520(endodeoxyribonuclease activity);GO:0004930(G protein-coupled receptor activity);GO:0004983(neuropeptide Y receptor activity);GO:0005515(protein binding);GO:0005634(nucleus);GO:0005654(nucleoplasm);GO:0005694(chromosome);GO:0005737(cytoplasm);GO:000…	NA	EC:4.2.99.18	hsa-miR-19a-5p	1a	-0.1482	66	150	-11.22
circRNA23863	chr2	68490191	68578003	+	10	circRNA	ENST00000445692	APLF	mRNA	chr2:68467827-68490190	aprataxin and PNKP like factor [Source:HGNC Symbol;Acc:HGNC:28724]	GO:0000012(single strand break repair);GO:0000166(nucleotide binding);GO:0003906(DNA-(apurinic or apyrimidinic site) endonuclease activity);GO:0004520(endodeoxyribonuclease activity);GO:0004930(G protein-coupled receptor activity);GO:0004983(neuropeptide Y receptor activity);GO:0005515(protein binding);GO:0005634(nucleus);GO:0005654(nucleoplasm);GO:0005694(chromosome);GO:0005737(cytoplasm);GO:000…	NA	EC:4.2.99.18	hsa-miR-19b-1-5p	1a	-0.15875	69	156	-21.96
ciRNA2788	chr2	68490190	68515736	+	1	ciRNA	ENST00000529851	APLF	mRNA	chr2:68490189-68515736	aprataxin and PNKP like factor [Source:HGNC Symbol;Acc:HGNC:28724]	GO:0000012(single strand break repair);GO:0000166(nucleotide binding);GO:0003906(DNA-(apurinic or apyrimidinic site) endonuclease activity);GO:0004520(endodeoxyribonuclease activity);GO:0004930(G protein-coupled receptor activity);GO:0004983(neuropeptide Y receptor activity);GO:0005515(protein binding);GO:0005634(nucleus);GO:0005654(nucleoplasm);GO:0005694(chromosome);GO:0005737(cytoplasm);GO:000…	NA	EC:4.2.99.18	hsa-miR-200b-3p	m8	-0.195	76	154	-13.36
ciRNA2788	chr2	68490190	68515736	+	1	ciRNA	ENST00000529851	APLF	mRNA	chr2:68490189-68515736	aprataxin and PNKP like factor [Source:HGNC Symbol;Acc:HGNC:28724]	GO:0000012(single strand break repair);GO:0000166(nucleotide binding);GO:0003906(DNA-(apurinic or apyrimidinic site) endonuclease activity);GO:0004520(endodeoxyribonuclease activity);GO:0004930(G protein-coupled receptor activity);GO:0004983(neuropeptide Y receptor activity);GO:0005515(protein binding);GO:0005634(nucleus);GO:0005654(nucleoplasm);GO:0005694(chromosome);GO:0005737(cytoplasm);GO:000…	NA	EC:4.2.99.18	hsa-miR-200b-5p	1a	-0.1893	84	142	-19.34
ciRNA2788	chr2	68490190	68515736	+	1	ciRNA	ENST00000529851	APLF	mRNA	chr2:68490189-68515736	aprataxin and PNKP like factor [Source:HGNC Symbol;Acc:HGNC:28724]	GO:0000012(single strand break repair);GO:0000166(nucleotide binding);GO:0003906(DNA-(apurinic or apyrimidinic site) endonuclease activity);GO:0004520(endodeoxyribonuclease activity);GO:0004930(G protein-coupled receptor activity);GO:0004983(neuropeptide Y receptor activity);GO:0005515(protein binding);GO:0005634(nucleus);GO:0005654(nucleoplasm);GO:0005694(chromosome);GO:0005737(cytoplasm);GO:000…	NA	EC:4.2.99.18	hsa-miR-203a-3p	1a	-0.1673	75	150	-15.28
circRNA23863	chr2	68490191	68578003	+	10	circRNA	ENST00000445692	APLF	mRNA	chr2:68467827-68490190	aprataxin and PNKP like factor [Source:HGNC Symbol;Acc:HGNC:28724]	GO:0000012(single strand break repair);GO:0000166(nucleotide binding);GO:0003906(DNA-(apurinic or apyrimidinic site) endonuclease activity);GO:0004520(endodeoxyribonuclease activity);GO:0004930(G protein-coupled receptor activity);GO:0004983(neuropeptide Y receptor activity);GO:0005515(protein binding);GO:0005634(nucleus);GO:0005654(nucleoplasm);GO:0005694(chromosome);GO:0005737(cytoplasm);GO:000…	NA	EC:4.2.99.18	hsa-miR-203a-3p	m8	-0.152	69	145	-12.94
ciRNA2788	chr2	68490190	68515736	+	1	ciRNA	ENST00000529851	APLF	mRNA	chr2:68490189-68515736	aprataxin and PNKP like factor [Source:HGNC Symbol;Acc:HGNC:28724]	GO:0000012(single strand break repair);GO:0000166(nucleotide binding);GO:0003906(DNA-(apurinic or apyrimidinic site) endonuclease activity);GO:0004520(endodeoxyribonuclease activity);GO:0004930(G protein-coupled receptor activity);GO:0004983(neuropeptide Y receptor activity);GO:0005515(protein binding);GO:0005634(nucleus);GO:0005654(nucleoplasm);GO:0005694(chromosome);GO:0005737(cytoplasm);GO:000…	NA	EC:4.2.99.18	hsa-miR-203a-5p	8mer	-0.1842	81	145	-17.52
ciRNA2788	chr2	68490190	68515736	+	1	ciRNA	ENST00000529851	APLF	mRNA	chr2:68490189-68515736	aprataxin and PNKP like factor [Source:HGNC Symbol;Acc:HGNC:28724]	GO:0000012(single strand break repair);GO:0000166(nucleotide binding);GO:0003906(DNA-(apurinic or apyrimidinic site) endonuclease activity);GO:0004520(endodeoxyribonuclease activity);GO:0004930(G protein-coupled receptor activity);GO:0004983(neuropeptide Y receptor activity);GO:0005515(protein binding);GO:0005634(nucleus);GO:0005654(nucleoplasm);GO:0005694(chromosome);GO:0005737(cytoplasm);GO:000…	NA	EC:4.2.99.18	hsa-miR-204-5p	8mer	-0.14825	65	155	-23.16
ciRNA2788	chr2	68490190	68515736	+	1	ciRNA	ENST00000529851	APLF	mRNA	chr2:68490189-68515736	aprataxin and PNKP like factor [Source:HGNC Symbol;Acc:HGNC:28724]	GO:0000012(single strand break repair);GO:0000166(nucleotide binding);GO:0003906(DNA-(apurinic or apyrimidinic site) endonuclease activity);GO:0004520(endodeoxyribonuclease activity);GO:0004930(G protein-coupled receptor activity);GO:0004983(neuropeptide Y receptor activity);GO:0005515(protein binding);GO:0005634(nucleus);GO:0005654(nucleoplasm);GO:0005694(chromosome);GO:0005737(cytoplasm);GO:000…	NA	EC:4.2.99.18	hsa-miR-205-3p	8mer	-0.25825	92	155	-17.12
ciRNA2788	chr2	68490190	68515736	+	1	ciRNA	ENST00000529851	APLF	mRNA	chr2:68490189-68515736	aprataxin and PNKP like factor [Source:HGNC Symbol;Acc:HGNC:28724]	GO:0000012(single strand break repair);GO:0000166(nucleotide binding);GO:0003906(DNA-(apurinic or apyrimidinic site) endonuclease activity);GO:0004520(endodeoxyribonuclease activity);GO:0004930(G protein-coupled receptor activity);GO:0004983(neuropeptide Y receptor activity);GO:0005515(protein binding);GO:0005634(nucleus);GO:0005654(nucleoplasm);GO:0005694(chromosome);GO:0005737(cytoplasm);GO:000…	NA	EC:4.2.99.18	hsa-miR-205-5p	m8	-0.1425	65	146	-15.14
ciRNA2788	chr2	68490190	68515736	+	1	ciRNA	ENST00000529851	APLF	mRNA	chr2:68490189-68515736	aprataxin and PNKP like factor [Source:HGNC Symbol;Acc:HGNC:28724]	GO:0000012(single strand break repair);GO:0000166(nucleotide binding);GO:0003906(DNA-(apurinic or apyrimidinic site) endonuclease activity);GO:0004520(endodeoxyribonuclease activity);GO:0004930(G protein-coupled receptor activity);GO:0004983(neuropeptide Y receptor activity);GO:0005515(protein binding);GO:0005634(nucleus);GO:0005654(nucleoplasm);GO:0005694(chromosome);GO:0005737(cytoplasm);GO:000…	NA	EC:4.2.99.18	hsa-miR-208a-5p	8mer	-0.26725	92	149	-16.08
circRNA23863	chr2	68490191	68578003	+	10	circRNA	ENST00000445692	APLF	mRNA	chr2:68467827-68490190	aprataxin and PNKP like factor [Source:HGNC Symbol;Acc:HGNC:28724]	GO:0000012(single strand break repair);GO:0000166(nucleotide binding);GO:0003906(DNA-(apurinic or apyrimidinic site) endonuclease activity);GO:0004520(endodeoxyribonuclease activity);GO:0004930(G protein-coupled receptor activity);GO:0004983(neuropeptide Y receptor activity);GO:0005515(protein binding);GO:0005634(nucleus);GO:0005654(nucleoplasm);GO:0005694(chromosome);GO:0005737(cytoplasm);GO:000…	NA	EC:4.2.99.18	hsa-miR-20a-3p	m8	-0.137	56	144	-13.61
ciRNA2788	chr2	68490190	68515736	+	1	ciRNA	ENST00000529851	APLF	mRNA	chr2:68490189-68515736	aprataxin and PNKP like factor [Source:HGNC Symbol;Acc:HGNC:28724]	GO:0000012(single strand break repair);GO:0000166(nucleotide binding);GO:0003906(DNA-(apurinic or apyrimidinic site) endonuclease activity);GO:0004520(endodeoxyribonuclease activity);GO:0004930(G protein-coupled receptor activity);GO:0004983(neuropeptide Y receptor activity);GO:0005515(protein binding);GO:0005634(nucleus);GO:0005654(nucleoplasm);GO:0005694(chromosome);GO:0005737(cytoplasm);GO:000…	NA	EC:4.2.99.18	hsa-miR-20a-5p	1a	-0.08985	57	165	-22.21
ciRNA2788	chr2	68490190	68515736	+	1	ciRNA	ENST00000529851	APLF	mRNA	chr2:68490189-68515736	aprataxin and PNKP like factor [Source:HGNC Symbol;Acc:HGNC:28724]	GO:0000012(single strand break repair);GO:0000166(nucleotide binding);GO:0003906(DNA-(apurinic or apyrimidinic site) endonuclease activity);GO:0004520(endodeoxyribonuclease activity);GO:0004930(G protein-coupled receptor activity);GO:0004983(neuropeptide Y receptor activity);GO:0005515(protein binding);GO:0005634(nucleus);GO:0005654(nucleoplasm);GO:0005694(chromosome);GO:0005737(cytoplasm);GO:000…	NA	EC:4.2.99.18	hsa-miR-210-5p	1a	-0.0813	59	141	-26.17
ciRNA2788	chr2	68490190	68515736	+	1	ciRNA	ENST00000529851	APLF	mRNA	chr2:68490189-68515736	aprataxin and PNKP like factor [Source:HGNC Symbol;Acc:HGNC:28724]	GO:0000012(single strand break repair);GO:0000166(nucleotide binding);GO:0003906(DNA-(apurinic or apyrimidinic site) endonuclease activity);GO:0004520(endodeoxyribonuclease activity);GO:0004930(G protein-coupled receptor activity);GO:0004983(neuropeptide Y receptor activity);GO:0005515(protein binding);GO:0005634(nucleus);GO:0005654(nucleoplasm);GO:0005694(chromosome);GO:0005737(cytoplasm);GO:000…	NA	EC:4.2.99.18	hsa-miR-211-3p	m8	-0.101	59	157	-24.66
ciRNA2788	chr2	68490190	68515736	+	1	ciRNA	ENST00000529851	APLF	mRNA	chr2:68490189-68515736	aprataxin and PNKP like factor [Source:HGNC Symbol;Acc:HGNC:28724]	GO:0000012(single strand break repair);GO:0000166(nucleotide binding);GO:0003906(DNA-(apurinic or apyrimidinic site) endonuclease activity);GO:0004520(endodeoxyribonuclease activity);GO:0004930(G protein-coupled receptor activity);GO:0004983(neuropeptide Y receptor activity);GO:0005515(protein binding);GO:0005634(nucleus);GO:0005654(nucleoplasm);GO:0005694(chromosome);GO:0005737(cytoplasm);GO:000…	NA	EC:4.2.99.18	hsa-miR-211-5p	8mer	-0.1503	65	163	-24.97
ciRNA2788	chr2	68490190	68515736	+	1	ciRNA	ENST00000529851	APLF	mRNA	chr2:68490189-68515736	aprataxin and PNKP like factor [Source:HGNC Symbol;Acc:HGNC:28724]	GO:0000012(single strand break repair);GO:0000166(nucleotide binding);GO:0003906(DNA-(apurinic or apyrimidinic site) endonuclease activity);GO:0004520(endodeoxyribonuclease activity);GO:0004930(G protein-coupled receptor activity);GO:0004983(neuropeptide Y receptor activity);GO:0005515(protein binding);GO:0005634(nucleus);GO:0005654(nucleoplasm);GO:0005694(chromosome);GO:0005737(cytoplasm);GO:000…	NA	EC:4.2.99.18	hsa-miR-21-3p	8mer	-0.29625	94	149	-12.8
ciRNA2788	chr2	68490190	68515736	+	1	ciRNA	ENST00000529851	APLF	mRNA	chr2:68490189-68515736	aprataxin and PNKP like factor [Source:HGNC Symbol;Acc:HGNC:28724]	GO:0000012(single strand break repair);GO:0000166(nucleotide binding);GO:0003906(DNA-(apurinic or apyrimidinic site) endonuclease activity);GO:0004520(endodeoxyribonuclease activity);GO:0004930(G protein-coupled receptor activity);GO:0004983(neuropeptide Y receptor activity);GO:0005515(protein binding);GO:0005634(nucleus);GO:0005654(nucleoplasm);GO:0005694(chromosome);GO:0005737(cytoplasm);GO:000…	NA	EC:4.2.99.18	hsa-miR-214-3p	m8	-0.144	70	147	-24.93
ciRNA2788	chr2	68490190	68515736	+	1	ciRNA	ENST00000529851	APLF	mRNA	chr2:68490189-68515736	aprataxin and PNKP like factor [Source:HGNC Symbol;Acc:HGNC:28724]	GO:0000012(single strand break repair);GO:0000166(nucleotide binding);GO:0003906(DNA-(apurinic or apyrimidinic site) endonuclease activity);GO:0004520(endodeoxyribonuclease activity);GO:0004930(G protein-coupled receptor activity);GO:0004983(neuropeptide Y receptor activity);GO:0005515(protein binding);GO:0005634(nucleus);GO:0005654(nucleoplasm);GO:0005694(chromosome);GO:0005737(cytoplasm);GO:000…	NA	EC:4.2.99.18	hsa-miR-215-3p	8mer	-0.23125	87	161	-21.75
ciRNA2788	chr2	68490190	68515736	+	1	ciRNA	ENST00000529851	APLF	mRNA	chr2:68490189-68515736	aprataxin and PNKP like factor [Source:HGNC Symbol;Acc:HGNC:28724]	GO:0000012(single strand break repair);GO:0000166(nucleotide binding);GO:0003906(DNA-(apurinic or apyrimidinic site) endonuclease activity);GO:0004520(endodeoxyribonuclease activity);GO:0004930(G protein-coupled receptor activity);GO:0004983(neuropeptide Y receptor activity);GO:0005515(protein binding);GO:0005634(nucleus);GO:0005654(nucleoplasm);GO:0005694(chromosome);GO:0005737(cytoplasm);GO:000…	NA	EC:4.2.99.18	hsa-miR-215-5p	m8	-0.139	74	152	-13.39
ciRNA2788	chr2	68490190	68515736	+	1	ciRNA	ENST00000529851	APLF	mRNA	chr2:68490189-68515736	aprataxin and PNKP like factor [Source:HGNC Symbol;Acc:HGNC:28724]	GO:0000012(single strand break repair);GO:0000166(nucleotide binding);GO:0003906(DNA-(apurinic or apyrimidinic site) endonuclease activity);GO:0004520(endodeoxyribonuclease activity);GO:0004930(G protein-coupled receptor activity);GO:0004983(neuropeptide Y receptor activity);GO:0005515(protein binding);GO:0005634(nucleus);GO:0005654(nucleoplasm);GO:0005694(chromosome);GO:0005737(cytoplasm);GO:000…	NA	EC:4.2.99.18	hsa-miR-21-5p	1a	-0.13065	58	141	-14.53
ciRNA2788	chr2	68490190	68515736	+	1	ciRNA	ENST00000529851	APLF	mRNA	chr2:68490189-68515736	aprataxin and PNKP like factor [Source:HGNC Symbol;Acc:HGNC:28724]	GO:0000012(single strand break repair);GO:0000166(nucleotide binding);GO:0003906(DNA-(apurinic or apyrimidinic site) endonuclease activity);GO:0004520(endodeoxyribonuclease activity);GO:0004930(G protein-coupled receptor activity);GO:0004983(neuropeptide Y receptor activity);GO:0005515(protein binding);GO:0005634(nucleus);GO:0005654(nucleoplasm);GO:0005694(chromosome);GO:0005737(cytoplasm);GO:000…	NA	EC:4.2.99.18	hsa-miR-216a-3p	1a	-0.16675	78	150	-22.45
ciRNA2788	chr2	68490190	68515736	+	1	ciRNA	ENST00000529851	APLF	mRNA	chr2:68490189-68515736	aprataxin and PNKP like factor [Source:HGNC Symbol;Acc:HGNC:28724]	GO:0000012(single strand break repair);GO:0000166(nucleotide binding);GO:0003906(DNA-(apurinic or apyrimidinic site) endonuclease activity);GO:0004520(endodeoxyribonuclease activity);GO:0004930(G protein-coupled receptor activity);GO:0004983(neuropeptide Y receptor activity);GO:0005515(protein binding);GO:0005634(nucleus);GO:0005654(nucleoplasm);GO:0005694(chromosome);GO:0005737(cytoplasm);GO:000…	NA	EC:4.2.99.18	hsa-miR-216a-5p	m8	-0.179	77	163	-20.41
ciRNA2788	chr2	68490190	68515736	+	1	ciRNA	ENST00000529851	APLF	mRNA	chr2:68490189-68515736	aprataxin and PNKP like factor [Source:HGNC Symbol;Acc:HGNC:28724]	GO:0000012(single strand break repair);GO:0000166(nucleotide binding);GO:0003906(DNA-(apurinic or apyrimidinic site) endonuclease activity);GO:0004520(endodeoxyribonuclease activity);GO:0004930(G protein-coupled receptor activity);GO:0004983(neuropeptide Y receptor activity);GO:0005515(protein binding);GO:0005634(nucleus);GO:0005654(nucleoplasm);GO:0005694(chromosome);GO:0005737(cytoplasm);GO:000…	NA	EC:4.2.99.18	hsa-miR-217-3p	m8	-0.2475	89	155	-15.86
ciRNA2788	chr2	68490190	68515736	+	1	ciRNA	ENST00000529851	APLF	mRNA	chr2:68490189-68515736	aprataxin and PNKP like factor [Source:HGNC Symbol;Acc:HGNC:28724]	GO:0000012(single strand break repair);GO:0000166(nucleotide binding);GO:0003906(DNA-(apurinic or apyrimidinic site) endonuclease activity);GO:0004520(endodeoxyribonuclease activity);GO:0004930(G protein-coupled receptor activity);GO:0004983(neuropeptide Y receptor activity);GO:0005515(protein binding);GO:0005634(nucleus);GO:0005654(nucleoplasm);GO:0005694(chromosome);GO:0005737(cytoplasm);GO:000…	NA	EC:4.2.99.18	hsa-miR-217-5p	1a	-0.1522	65	140	-12.38
ciRNA2788	chr2	68490190	68515736	+	1	ciRNA	ENST00000529851	APLF	mRNA	chr2:68490189-68515736	aprataxin and PNKP like factor [Source:HGNC Symbol;Acc:HGNC:28724]	GO:0000012(single strand break repair);GO:0000166(nucleotide binding);GO:0003906(DNA-(apurinic or apyrimidinic site) endonuclease activity);GO:0004520(endodeoxyribonuclease activity);GO:0004930(G protein-coupled receptor activity);GO:0004983(neuropeptide Y receptor activity);GO:0005515(protein binding);GO:0005634(nucleus);GO:0005654(nucleoplasm);GO:0005694(chromosome);GO:0005737(cytoplasm);GO:000…	NA	EC:4.2.99.18	hsa-miR-218-1-3p	8mer	-0.1742	72	146	-14.42
ciRNA2788	chr2	68490190	68515736	+	1	ciRNA	ENST00000529851	APLF	mRNA	chr2:68490189-68515736	aprataxin and PNKP like factor [Source:HGNC Symbol;Acc:HGNC:28724]	GO:0000012(single strand break repair);GO:0000166(nucleotide binding);GO:0003906(DNA-(apurinic or apyrimidinic site) endonuclease activity);GO:0004520(endodeoxyribonuclease activity);GO:0004930(G protein-coupled receptor activity);GO:0004983(neuropeptide Y receptor activity);GO:0005515(protein binding);GO:0005634(nucleus);GO:0005654(nucleoplasm);GO:0005694(chromosome);GO:0005737(cytoplasm);GO:000…	NA	EC:4.2.99.18	hsa-miR-218-2-3p	8mer	-0.2541	91	142	-10.04
ciRNA2788	chr2	68490190	68515736	+	1	ciRNA	ENST00000529851	APLF	mRNA	chr2:68490189-68515736	aprataxin and PNKP like factor [Source:HGNC Symbol;Acc:HGNC:28724]	GO:0000012(single strand break repair);GO:0000166(nucleotide binding);GO:0003906(DNA-(apurinic or apyrimidinic site) endonuclease activity);GO:0004520(endodeoxyribonuclease activity);GO:0004930(G protein-coupled receptor activity);GO:0004983(neuropeptide Y receptor activity);GO:0005515(protein binding);GO:0005634(nucleus);GO:0005654(nucleoplasm);GO:0005694(chromosome);GO:0005737(cytoplasm);GO:000…	NA	EC:4.2.99.18	hsa-miR-218-5p	1a	-0.21175	82	153	-15.52
ciRNA2788	chr2	68490190	68515736	+	1	ciRNA	ENST00000529851	APLF	mRNA	chr2:68490189-68515736	aprataxin and PNKP like factor [Source:HGNC Symbol;Acc:HGNC:28724]	GO:0000012(single strand break repair);GO:0000166(nucleotide binding);GO:0003906(DNA-(apurinic or apyrimidinic site) endonuclease activity);GO:0004520(endodeoxyribonuclease activity);GO:0004930(G protein-coupled receptor activity);GO:0004983(neuropeptide Y receptor activity);GO:0005515(protein binding);GO:0005634(nucleus);GO:0005654(nucleoplasm);GO:0005694(chromosome);GO:0005737(cytoplasm);GO:000…	NA	EC:4.2.99.18	hsa-miR-219a-5p	8mer	-0.1152	58	151	-14.53
ciRNA2788	chr2	68490190	68515736	+	1	ciRNA	ENST00000529851	APLF	mRNA	chr2:68490189-68515736	aprataxin and PNKP like factor [Source:HGNC Symbol;Acc:HGNC:28724]	GO:0000012(single strand break repair);GO:0000166(nucleotide binding);GO:0003906(DNA-(apurinic or apyrimidinic site) endonuclease activity);GO:0004520(endodeoxyribonuclease activity);GO:0004930(G protein-coupled receptor activity);GO:0004983(neuropeptide Y receptor activity);GO:0005515(protein binding);GO:0005634(nucleus);GO:0005654(nucleoplasm);GO:0005694(chromosome);GO:0005737(cytoplasm);GO:000…	NA	EC:4.2.99.18	hsa-miR-221-5p	8mer	-0.17525	84	150	-15.68
circRNA23863	chr2	68490191	68578003	+	10	circRNA	ENST00000445692	APLF	mRNA	chr2:68467827-68490190	aprataxin and PNKP like factor [Source:HGNC Symbol;Acc:HGNC:28724]	GO:0000012(single strand break repair);GO:0000166(nucleotide binding);GO:0003906(DNA-(apurinic or apyrimidinic site) endonuclease activity);GO:0004520(endodeoxyribonuclease activity);GO:0004930(G protein-coupled receptor activity);GO:0004983(neuropeptide Y receptor activity);GO:0005515(protein binding);GO:0005634(nucleus);GO:0005654(nucleoplasm);GO:0005694(chromosome);GO:0005737(cytoplasm);GO:000…	NA	EC:4.2.99.18	hsa-miR-221-5p	m8	-0.1785	84	151	-17.33
ciRNA2788	chr2	68490190	68515736	+	1	ciRNA	ENST00000529851	APLF	mRNA	chr2:68490189-68515736	aprataxin and PNKP like factor [Source:HGNC Symbol;Acc:HGNC:28724]	GO:0000012(single strand break repair);GO:0000166(nucleotide binding);GO:0003906(DNA-(apurinic or apyrimidinic site) endonuclease activity);GO:0004520(endodeoxyribonuclease activity);GO:0004930(G protein-coupled receptor activity);GO:0004983(neuropeptide Y receptor activity);GO:0005515(protein binding);GO:0005634(nucleus);GO:0005654(nucleoplasm);GO:0005694(chromosome);GO:0005737(cytoplasm);GO:000…	NA	EC:4.2.99.18	hsa-miR-222-5p	1a	-0.11465	52	143	-18.52
circRNA23863	chr2	68490191	68578003	+	10	circRNA	ENST00000445692	APLF	mRNA	chr2:68467827-68490190	aprataxin and PNKP like factor [Source:HGNC Symbol;Acc:HGNC:28724]	GO:0000012(single strand break repair);GO:0000166(nucleotide binding);GO:0003906(DNA-(apurinic or apyrimidinic site) endonuclease activity);GO:0004520(endodeoxyribonuclease activity);GO:0004930(G protein-coupled receptor activity);GO:0004983(neuropeptide Y receptor activity);GO:0005515(protein binding);GO:0005634(nucleus);GO:0005654(nucleoplasm);GO:0005694(chromosome);GO:0005737(cytoplasm);GO:000…	NA	EC:4.2.99.18	hsa-miR-222-5p	m8	-0.161	73	144	-14.66
ciRNA2788	chr2	68490190	68515736	+	1	ciRNA	ENST00000529851	APLF	mRNA	chr2:68490189-68515736	aprataxin and PNKP like factor [Source:HGNC Symbol;Acc:HGNC:28724]	GO:0000012(single strand break repair);GO:0000166(nucleotide binding);GO:0003906(DNA-(apurinic or apyrimidinic site) endonuclease activity);GO:0004520(endodeoxyribonuclease activity);GO:0004930(G protein-coupled receptor activity);GO:0004983(neuropeptide Y receptor activity);GO:0005515(protein binding);GO:0005634(nucleus);GO:0005654(nucleoplasm);GO:0005694(chromosome);GO:0005737(cytoplasm);GO:000…	NA	EC:4.2.99.18	hsa-miR-223-5p	8mer	-0.3493	96	160	-19
ciRNA2788	chr2	68490190	68515736	+	1	ciRNA	ENST00000529851	APLF	mRNA	chr2:68490189-68515736	aprataxin and PNKP like factor [Source:HGNC Symbol;Acc:HGNC:28724]	GO:0000012(single strand break repair);GO:0000166(nucleotide binding);GO:0003906(DNA-(apurinic or apyrimidinic site) endonuclease activity);GO:0004520(endodeoxyribonuclease activity);GO:0004930(G protein-coupled receptor activity);GO:0004983(neuropeptide Y receptor activity);GO:0005515(protein binding);GO:0005634(nucleus);GO:0005654(nucleoplasm);GO:0005694(chromosome);GO:0005737(cytoplasm);GO:000…	NA	EC:4.2.99.18	hsa-miR-224-3p	1a	-0.11875	52	154	-15.39
circRNA23863	chr2	68490191	68578003	+	10	circRNA	ENST00000445692	APLF	mRNA	chr2:68467827-68490190	aprataxin and PNKP like factor [Source:HGNC Symbol;Acc:HGNC:28724]	GO:0000012(single strand break repair);GO:0000166(nucleotide binding);GO:0003906(DNA-(apurinic or apyrimidinic site) endonuclease activity);GO:0004520(endodeoxyribonuclease activity);GO:0004930(G protein-coupled receptor activity);GO:0004983(neuropeptide Y receptor activity);GO:0005515(protein binding);GO:0005634(nucleus);GO:0005654(nucleoplasm);GO:0005694(chromosome);GO:0005737(cytoplasm);GO:000…	NA	EC:4.2.99.18	hsa-miR-224-3p	m8	-0.1435	63	157	-17.56
ciRNA2788	chr2	68490190	68515736	+	1	ciRNA	ENST00000529851	APLF	mRNA	chr2:68490189-68515736	aprataxin and PNKP like factor [Source:HGNC Symbol;Acc:HGNC:28724]	GO:0000012(single strand break repair);GO:0000166(nucleotide binding);GO:0003906(DNA-(apurinic or apyrimidinic site) endonuclease activity);GO:0004520(endodeoxyribonuclease activity);GO:0004930(G protein-coupled receptor activity);GO:0004983(neuropeptide Y receptor activity);GO:0005515(protein binding);GO:0005634(nucleus);GO:0005654(nucleoplasm);GO:0005694(chromosome);GO:0005737(cytoplasm);GO:000…	NA	EC:4.2.99.18	hsa-miR-22-5p	8mer	-0.1912	69	147	-22.87
circRNA23863	chr2	68490191	68578003	+	10	circRNA	ENST00000445692	APLF	mRNA	chr2:68467827-68490190	aprataxin and PNKP like factor [Source:HGNC Symbol;Acc:HGNC:28724]	GO:0000012(single strand break repair);GO:0000166(nucleotide binding);GO:0003906(DNA-(apurinic or apyrimidinic site) endonuclease activity);GO:0004520(endodeoxyribonuclease activity);GO:0004930(G protein-coupled receptor activity);GO:0004983(neuropeptide Y receptor activity);GO:0005515(protein binding);GO:0005634(nucleus);GO:0005654(nucleoplasm);GO:0005694(chromosome);GO:0005737(cytoplasm);GO:000…	NA	EC:4.2.99.18	hsa-miR-22-5p	1a	-0.1606	61	148	-18.41
ciRNA2788	chr2	68490190	68515736	+	1	ciRNA	ENST00000529851	APLF	mRNA	chr2:68490189-68515736	aprataxin and PNKP like factor [Source:HGNC Symbol;Acc:HGNC:28724]	GO:0000012(single strand break repair);GO:0000166(nucleotide binding);GO:0003906(DNA-(apurinic or apyrimidinic site) endonuclease activity);GO:0004520(endodeoxyribonuclease activity);GO:0004930(G protein-coupled receptor activity);GO:0004983(neuropeptide Y receptor activity);GO:0005515(protein binding);GO:0005634(nucleus);GO:0005654(nucleoplasm);GO:0005694(chromosome);GO:0005737(cytoplasm);GO:000…	NA	EC:4.2.99.18	hsa-miR-23a-3p	m8	-0.1885	75	151	-22.87
ciRNA2788	chr2	68490190	68515736	+	1	ciRNA	ENST00000529851	APLF	mRNA	chr2:68490189-68515736	aprataxin and PNKP like factor [Source:HGNC Symbol;Acc:HGNC:28724]	GO:0000012(single strand break repair);GO:0000166(nucleotide binding);GO:0003906(DNA-(apurinic or apyrimidinic site) endonuclease activity);GO:0004520(endodeoxyribonuclease activity);GO:0004930(G protein-coupled receptor activity);GO:0004983(neuropeptide Y receptor activity);GO:0005515(protein binding);GO:0005634(nucleus);GO:0005654(nucleoplasm);GO:0005694(chromosome);GO:0005737(cytoplasm);GO:000…	NA	EC:4.2.99.18	hsa-miR-23b-3p	m8	-0.1885	76	151	-22.87
ciRNA2788	chr2	68490190	68515736	+	1	ciRNA	ENST00000529851	APLF	mRNA	chr2:68490189-68515736	aprataxin and PNKP like factor [Source:HGNC Symbol;Acc:HGNC:28724]	GO:0000012(single strand break repair);GO:0000166(nucleotide binding);GO:0003906(DNA-(apurinic or apyrimidinic site) endonuclease activity);GO:0004520(endodeoxyribonuclease activity);GO:0004930(G protein-coupled receptor activity);GO:0004983(neuropeptide Y receptor activity);GO:0005515(protein binding);GO:0005634(nucleus);GO:0005654(nucleoplasm);GO:0005694(chromosome);GO:0005737(cytoplasm);GO:000…	NA	EC:4.2.99.18	hsa-miR-24-3p	8mer	-0.2682	96	161	-22.06
ciRNA2788	chr2	68490190	68515736	+	1	ciRNA	ENST00000529851	APLF	mRNA	chr2:68490189-68515736	aprataxin and PNKP like factor [Source:HGNC Symbol;Acc:HGNC:28724]	GO:0000012(single strand break repair);GO:0000166(nucleotide binding);GO:0003906(DNA-(apurinic or apyrimidinic site) endonuclease activity);GO:0004520(endodeoxyribonuclease activity);GO:0004930(G protein-coupled receptor activity);GO:0004983(neuropeptide Y receptor activity);GO:0005515(protein binding);GO:0005634(nucleus);GO:0005654(nucleoplasm);GO:0005694(chromosome);GO:0005737(cytoplasm);GO:000…	NA	EC:4.2.99.18	hsa-miR-25-3p	m8	-0.111	61	154	-23.36
circRNA23863	chr2	68490191	68578003	+	10	circRNA	ENST00000445692	APLF	mRNA	chr2:68467827-68490190	aprataxin and PNKP like factor [Source:HGNC Symbol;Acc:HGNC:28724]	GO:0000012(single strand break repair);GO:0000166(nucleotide binding);GO:0003906(DNA-(apurinic or apyrimidinic site) endonuclease activity);GO:0004520(endodeoxyribonuclease activity);GO:0004930(G protein-coupled receptor activity);GO:0004983(neuropeptide Y receptor activity);GO:0005515(protein binding);GO:0005634(nucleus);GO:0005654(nucleoplasm);GO:0005694(chromosome);GO:0005737(cytoplasm);GO:000…	NA	EC:4.2.99.18	hsa-miR-25-3p	1a	-0.12585	67	146	-19.54
ciRNA2788	chr2	68490190	68515736	+	1	ciRNA	ENST00000529851	APLF	mRNA	chr2:68490189-68515736	aprataxin and PNKP like factor [Source:HGNC Symbol;Acc:HGNC:28724]	GO:0000012(single strand break repair);GO:0000166(nucleotide binding);GO:0003906(DNA-(apurinic or apyrimidinic site) endonuclease activity);GO:0004520(endodeoxyribonuclease activity);GO:0004930(G protein-coupled receptor activity);GO:0004983(neuropeptide Y receptor activity);GO:0005515(protein binding);GO:0005634(nucleus);GO:0005654(nucleoplasm);GO:0005694(chromosome);GO:0005737(cytoplasm);GO:000…	NA	EC:4.2.99.18	hsa-miR-25-5p	m8	-0.073	71	153	-23.3
ciRNA2788	chr2	68490190	68515736	+	1	ciRNA	ENST00000529851	APLF	mRNA	chr2:68490189-68515736	aprataxin and PNKP like factor [Source:HGNC Symbol;Acc:HGNC:28724]	GO:0000012(single strand break repair);GO:0000166(nucleotide binding);GO:0003906(DNA-(apurinic or apyrimidinic site) endonuclease activity);GO:0004520(endodeoxyribonuclease activity);GO:0004930(G protein-coupled receptor activity);GO:0004983(neuropeptide Y receptor activity);GO:0005515(protein binding);GO:0005634(nucleus);GO:0005654(nucleoplasm);GO:0005694(chromosome);GO:0005737(cytoplasm);GO:000…	NA	EC:4.2.99.18	hsa-miR-26a-1-3p	8mer	-0.31625	95	156	-21.16
circRNA23863	chr2	68490191	68578003	+	10	circRNA	ENST00000445692	APLF	mRNA	chr2:68467827-68490190	aprataxin and PNKP like factor [Source:HGNC Symbol;Acc:HGNC:28724]	GO:0000012(single strand break repair);GO:0000166(nucleotide binding);GO:0003906(DNA-(apurinic or apyrimidinic site) endonuclease activity);GO:0004520(endodeoxyribonuclease activity);GO:0004930(G protein-coupled receptor activity);GO:0004983(neuropeptide Y receptor activity);GO:0005515(protein binding);GO:0005634(nucleus);GO:0005654(nucleoplasm);GO:0005694(chromosome);GO:0005737(cytoplasm);GO:000…	NA	EC:4.2.99.18	hsa-miR-26a-1-3p	8mer	-0.2732	92	155	-12.28
ciRNA2788	chr2	68490190	68515736	+	1	ciRNA	ENST00000529851	APLF	mRNA	chr2:68490189-68515736	aprataxin and PNKP like factor [Source:HGNC Symbol;Acc:HGNC:28724]	GO:0000012(single strand break repair);GO:0000166(nucleotide binding);GO:0003906(DNA-(apurinic or apyrimidinic site) endonuclease activity);GO:0004520(endodeoxyribonuclease activity);GO:0004930(G protein-coupled receptor activity);GO:0004983(neuropeptide Y receptor activity);GO:0005515(protein binding);GO:0005634(nucleus);GO:0005654(nucleoplasm);GO:0005694(chromosome);GO:0005737(cytoplasm);GO:000…	NA	EC:4.2.99.18	hsa-miR-26a-5p	1a	-0.1532	72	141	-18.43
ciRNA2788	chr2	68490190	68515736	+	1	ciRNA	ENST00000529851	APLF	mRNA	chr2:68490189-68515736	aprataxin and PNKP like factor [Source:HGNC Symbol;Acc:HGNC:28724]	GO:0000012(single strand break repair);GO:0000166(nucleotide binding);GO:0003906(DNA-(apurinic or apyrimidinic site) endonuclease activity);GO:0004520(endodeoxyribonuclease activity);GO:0004930(G protein-coupled receptor activity);GO:0004983(neuropeptide Y receptor activity);GO:0005515(protein binding);GO:0005634(nucleus);GO:0005654(nucleoplasm);GO:0005694(chromosome);GO:0005737(cytoplasm);GO:000…	NA	EC:4.2.99.18	hsa-miR-26b-3p	8mer	-0.2642	87	154	-20.81
ciRNA2788	chr2	68490190	68515736	+	1	ciRNA	ENST00000529851	APLF	mRNA	chr2:68490189-68515736	aprataxin and PNKP like factor [Source:HGNC Symbol;Acc:HGNC:28724]	GO:0000012(single strand break repair);GO:0000166(nucleotide binding);GO:0003906(DNA-(apurinic or apyrimidinic site) endonuclease activity);GO:0004520(endodeoxyribonuclease activity);GO:0004930(G protein-coupled receptor activity);GO:0004983(neuropeptide Y receptor activity);GO:0005515(protein binding);GO:0005634(nucleus);GO:0005654(nucleoplasm);GO:0005694(chromosome);GO:0005737(cytoplasm);GO:000…	NA	EC:4.2.99.18	hsa-miR-26b-5p	1a	-0.1532	71	144	-18.58
ciRNA2788	chr2	68490190	68515736	+	1	ciRNA	ENST00000529851	APLF	mRNA	chr2:68490189-68515736	aprataxin and PNKP like factor [Source:HGNC Symbol;Acc:HGNC:28724]	GO:0000012(single strand break repair);GO:0000166(nucleotide binding);GO:0003906(DNA-(apurinic or apyrimidinic site) endonuclease activity);GO:0004520(endodeoxyribonuclease activity);GO:0004930(G protein-coupled receptor activity);GO:0004983(neuropeptide Y receptor activity);GO:0005515(protein binding);GO:0005634(nucleus);GO:0005654(nucleoplasm);GO:0005694(chromosome);GO:0005737(cytoplasm);GO:000…	NA	EC:4.2.99.18	hsa-miR-27a-3p	m8	-0.2425	87	145	-20.02
ciRNA2788	chr2	68490190	68515736	+	1	ciRNA	ENST00000529851	APLF	mRNA	chr2:68490189-68515736	aprataxin and PNKP like factor [Source:HGNC Symbol;Acc:HGNC:28724]	GO:0000012(single strand break repair);GO:0000166(nucleotide binding);GO:0003906(DNA-(apurinic or apyrimidinic site) endonuclease activity);GO:0004520(endodeoxyribonuclease activity);GO:0004930(G protein-coupled receptor activity);GO:0004983(neuropeptide Y receptor activity);GO:0005515(protein binding);GO:0005634(nucleus);GO:0005654(nucleoplasm);GO:0005694(chromosome);GO:0005737(cytoplasm);GO:000…	NA	EC:4.2.99.18	hsa-miR-27a-5p	8mer	-0.18625	88	154	-16.94
circRNA23863	chr2	68490191	68578003	+	10	circRNA	ENST00000445692	APLF	mRNA	chr2:68467827-68490190	aprataxin and PNKP like factor [Source:HGNC Symbol;Acc:HGNC:28724]	GO:0000012(single strand break repair);GO:0000166(nucleotide binding);GO:0003906(DNA-(apurinic or apyrimidinic site) endonuclease activity);GO:0004520(endodeoxyribonuclease activity);GO:0004930(G protein-coupled receptor activity);GO:0004983(neuropeptide Y receptor activity);GO:0005515(protein binding);GO:0005634(nucleus);GO:0005654(nucleoplasm);GO:0005694(chromosome);GO:0005737(cytoplasm);GO:000…	NA	EC:4.2.99.18	hsa-miR-27a-5p	m8	-0.216	92	146	-17.46
ciRNA2788	chr2	68490190	68515736	+	1	ciRNA	ENST00000529851	APLF	mRNA	chr2:68490189-68515736	aprataxin and PNKP like factor [Source:HGNC Symbol;Acc:HGNC:28724]	GO:0000012(single strand break repair);GO:0000166(nucleotide binding);GO:0003906(DNA-(apurinic or apyrimidinic site) endonuclease activity);GO:0004520(endodeoxyribonuclease activity);GO:0004930(G protein-coupled receptor activity);GO:0004983(neuropeptide Y receptor activity);GO:0005515(protein binding);GO:0005634(nucleus);GO:0005654(nucleoplasm);GO:0005694(chromosome);GO:0005737(cytoplasm);GO:000…	NA	EC:4.2.99.18	hsa-miR-27b-3p	m8	-0.2425	87	147	-19.93
ciRNA2788	chr2	68490190	68515736	+	1	ciRNA	ENST00000529851	APLF	mRNA	chr2:68490189-68515736	aprataxin and PNKP like factor [Source:HGNC Symbol;Acc:HGNC:28724]	GO:0000012(single strand break repair);GO:0000166(nucleotide binding);GO:0003906(DNA-(apurinic or apyrimidinic site) endonuclease activity);GO:0004520(endodeoxyribonuclease activity);GO:0004930(G protein-coupled receptor activity);GO:0004983(neuropeptide Y receptor activity);GO:0005515(protein binding);GO:0005634(nucleus);GO:0005654(nucleoplasm);GO:0005694(chromosome);GO:0005737(cytoplasm);GO:000…	NA	EC:4.2.99.18	hsa-miR-27b-5p	8mer	-0.17215	83	159	-24.43
ciRNA2788	chr2	68490190	68515736	+	1	ciRNA	ENST00000529851	APLF	mRNA	chr2:68490189-68515736	aprataxin and PNKP like factor [Source:HGNC Symbol;Acc:HGNC:28724]	GO:0000012(single strand break repair);GO:0000166(nucleotide binding);GO:0003906(DNA-(apurinic or apyrimidinic site) endonuclease activity);GO:0004520(endodeoxyribonuclease activity);GO:0004930(G protein-coupled receptor activity);GO:0004983(neuropeptide Y receptor activity);GO:0005515(protein binding);GO:0005634(nucleus);GO:0005654(nucleoplasm);GO:0005694(chromosome);GO:0005737(cytoplasm);GO:000…	NA	EC:4.2.99.18	hsa-miR-28-3p	m8	-0.1325	63	158	-25.76
ciRNA2788	chr2	68490190	68515736	+	1	ciRNA	ENST00000529851	APLF	mRNA	chr2:68490189-68515736	aprataxin and PNKP like factor [Source:HGNC Symbol;Acc:HGNC:28724]	GO:0000012(single strand break repair);GO:0000166(nucleotide binding);GO:0003906(DNA-(apurinic or apyrimidinic site) endonuclease activity);GO:0004520(endodeoxyribonuclease activity);GO:0004930(G protein-coupled receptor activity);GO:0004983(neuropeptide Y receptor activity);GO:0005515(protein binding);GO:0005634(nucleus);GO:0005654(nucleoplasm);GO:0005694(chromosome);GO:0005737(cytoplasm);GO:000…	NA	EC:4.2.99.18	hsa-miR-29a-3p	8mer	-0.18015	75	162	-17.87
circRNA23863	chr2	68490191	68578003	+	10	circRNA	ENST00000445692	APLF	mRNA	chr2:68467827-68490190	aprataxin and PNKP like factor [Source:HGNC Symbol;Acc:HGNC:28724]	GO:0000012(single strand break repair);GO:0000166(nucleotide binding);GO:0003906(DNA-(apurinic or apyrimidinic site) endonuclease activity);GO:0004520(endodeoxyribonuclease activity);GO:0004930(G protein-coupled receptor activity);GO:0004983(neuropeptide Y receptor activity);GO:0005515(protein binding);GO:0005634(nucleus);GO:0005654(nucleoplasm);GO:0005694(chromosome);GO:0005737(cytoplasm);GO:000…	NA	EC:4.2.99.18	hsa-miR-29a-3p	8mer	-0.45715	99	146	-17.87
ciRNA2788	chr2	68490190	68515736	+	1	ciRNA	ENST00000529851	APLF	mRNA	chr2:68490189-68515736	aprataxin and PNKP like factor [Source:HGNC Symbol;Acc:HGNC:28724]	GO:0000012(single strand break repair);GO:0000166(nucleotide binding);GO:0003906(DNA-(apurinic or apyrimidinic site) endonuclease activity);GO:0004520(endodeoxyribonuclease activity);GO:0004930(G protein-coupled receptor activity);GO:0004983(neuropeptide Y receptor activity);GO:0005515(protein binding);GO:0005634(nucleus);GO:0005654(nucleoplasm);GO:0005694(chromosome);GO:0005737(cytoplasm);GO:000…	NA	EC:4.2.99.18	hsa-miR-29a-5p	8mer	-0.2141	78	161	-16.77
ciRNA2788	chr2	68490190	68515736	+	1	ciRNA	ENST00000529851	APLF	mRNA	chr2:68490189-68515736	aprataxin and PNKP like factor [Source:HGNC Symbol;Acc:HGNC:28724]	GO:0000012(single strand break repair);GO:0000166(nucleotide binding);GO:0003906(DNA-(apurinic or apyrimidinic site) endonuclease activity);GO:0004520(endodeoxyribonuclease activity);GO:0004930(G protein-coupled receptor activity);GO:0004983(neuropeptide Y receptor activity);GO:0005515(protein binding);GO:0005634(nucleus);GO:0005654(nucleoplasm);GO:0005694(chromosome);GO:0005737(cytoplasm);GO:000…	NA	EC:4.2.99.18	hsa-miR-29b-1-5p	8mer	-0.15325	63	165	-23.95
ciRNA2788	chr2	68490190	68515736	+	1	ciRNA	ENST00000529851	APLF	mRNA	chr2:68490189-68515736	aprataxin and PNKP like factor [Source:HGNC Symbol;Acc:HGNC:28724]	GO:0000012(single strand break repair);GO:0000166(nucleotide binding);GO:0003906(DNA-(apurinic or apyrimidinic site) endonuclease activity);GO:0004520(endodeoxyribonuclease activity);GO:0004930(G protein-coupled receptor activity);GO:0004983(neuropeptide Y receptor activity);GO:0005515(protein binding);GO:0005634(nucleus);GO:0005654(nucleoplasm);GO:0005694(chromosome);GO:0005737(cytoplasm);GO:000…	NA	EC:4.2.99.18	hsa-miR-29b-2-5p	m8	-0.167	72	159	-23.39
circRNA23863	chr2	68490191	68578003	+	10	circRNA	ENST00000445692	APLF	mRNA	chr2:68467827-68490190	aprataxin and PNKP like factor [Source:HGNC Symbol;Acc:HGNC:28724]	GO:0000012(single strand break repair);GO:0000166(nucleotide binding);GO:0003906(DNA-(apurinic or apyrimidinic site) endonuclease activity);GO:0004520(endodeoxyribonuclease activity);GO:0004930(G protein-coupled receptor activity);GO:0004983(neuropeptide Y receptor activity);GO:0005515(protein binding);GO:0005634(nucleus);GO:0005654(nucleoplasm);GO:0005694(chromosome);GO:0005737(cytoplasm);GO:000…	NA	EC:4.2.99.18	hsa-miR-29b-2-5p	m8	-0.159	69	147	-18.7
ciRNA2788	chr2	68490190	68515736	+	1	ciRNA	ENST00000529851	APLF	mRNA	chr2:68490189-68515736	aprataxin and PNKP like factor [Source:HGNC Symbol;Acc:HGNC:28724]	GO:0000012(single strand break repair);GO:0000166(nucleotide binding);GO:0003906(DNA-(apurinic or apyrimidinic site) endonuclease activity);GO:0004520(endodeoxyribonuclease activity);GO:0004930(G protein-coupled receptor activity);GO:0004983(neuropeptide Y receptor activity);GO:0005515(protein binding);GO:0005634(nucleus);GO:0005654(nucleoplasm);GO:0005694(chromosome);GO:0005737(cytoplasm);GO:000…	NA	EC:4.2.99.18	hsa-miR-29b-3p	8mer	-0.18015	74	166	-20.76
circRNA23863	chr2	68490191	68578003	+	10	circRNA	ENST00000445692	APLF	mRNA	chr2:68467827-68490190	aprataxin and PNKP like factor [Source:HGNC Symbol;Acc:HGNC:28724]	GO:0000012(single strand break repair);GO:0000166(nucleotide binding);GO:0003906(DNA-(apurinic or apyrimidinic site) endonuclease activity);GO:0004520(endodeoxyribonuclease activity);GO:0004930(G protein-coupled receptor activity);GO:0004983(neuropeptide Y receptor activity);GO:0005515(protein binding);GO:0005634(nucleus);GO:0005654(nucleoplasm);GO:0005694(chromosome);GO:0005737(cytoplasm);GO:000…	NA	EC:4.2.99.18	hsa-miR-29b-3p	8mer	-0.45715	99	156	-20.76
ciRNA2788	chr2	68490190	68515736	+	1	ciRNA	ENST00000529851	APLF	mRNA	chr2:68490189-68515736	aprataxin and PNKP like factor [Source:HGNC Symbol;Acc:HGNC:28724]	GO:0000012(single strand break repair);GO:0000166(nucleotide binding);GO:0003906(DNA-(apurinic or apyrimidinic site) endonuclease activity);GO:0004520(endodeoxyribonuclease activity);GO:0004930(G protein-coupled receptor activity);GO:0004983(neuropeptide Y receptor activity);GO:0005515(protein binding);GO:0005634(nucleus);GO:0005654(nucleoplasm);GO:0005694(chromosome);GO:0005737(cytoplasm);GO:000…	NA	EC:4.2.99.18	hsa-miR-30a-3p	8mer	-0.1905	75	158	-17.27
circRNA23863	chr2	68490191	68578003	+	10	circRNA	ENST00000445692	APLF	mRNA	chr2:68467827-68490190	aprataxin and PNKP like factor [Source:HGNC Symbol;Acc:HGNC:28724]	GO:0000012(single strand break repair);GO:0000166(nucleotide binding);GO:0003906(DNA-(apurinic or apyrimidinic site) endonuclease activity);GO:0004520(endodeoxyribonuclease activity);GO:0004930(G protein-coupled receptor activity);GO:0004983(neuropeptide Y receptor activity);GO:0005515(protein binding);GO:0005634(nucleus);GO:0005654(nucleoplasm);GO:0005694(chromosome);GO:0005737(cytoplasm);GO:000…	NA	EC:4.2.99.18	hsa-miR-30a-3p	8mer	-0.1763	71	141	-11.6
ciRNA2788	chr2	68490190	68515736	+	1	ciRNA	ENST00000529851	APLF	mRNA	chr2:68490189-68515736	aprataxin and PNKP like factor [Source:HGNC Symbol;Acc:HGNC:28724]	GO:0000012(single strand break repair);GO:0000166(nucleotide binding);GO:0003906(DNA-(apurinic or apyrimidinic site) endonuclease activity);GO:0004520(endodeoxyribonuclease activity);GO:0004930(G protein-coupled receptor activity);GO:0004983(neuropeptide Y receptor activity);GO:0005515(protein binding);GO:0005634(nucleus);GO:0005654(nucleoplasm);GO:0005694(chromosome);GO:0005737(cytoplasm);GO:000…	NA	EC:4.2.99.18	hsa-miR-30a-5p	m8	-0.1365	58	163	-16.4
ciRNA2788	chr2	68490190	68515736	+	1	ciRNA	ENST00000529851	APLF	mRNA	chr2:68490189-68515736	aprataxin and PNKP like factor [Source:HGNC Symbol;Acc:HGNC:28724]	GO:0000012(single strand break repair);GO:0000166(nucleotide binding);GO:0003906(DNA-(apurinic or apyrimidinic site) endonuclease activity);GO:0004520(endodeoxyribonuclease activity);GO:0004930(G protein-coupled receptor activity);GO:0004983(neuropeptide Y receptor activity);GO:0005515(protein binding);GO:0005634(nucleus);GO:0005654(nucleoplasm);GO:0005694(chromosome);GO:0005737(cytoplasm);GO:000…	NA	EC:4.2.99.18	hsa-miR-30b-3p	8mer	-0.05315	56	170	-25.57
circRNA23863	chr2	68490191	68578003	+	10	circRNA	ENST00000445692	APLF	mRNA	chr2:68467827-68490190	aprataxin and PNKP like factor [Source:HGNC Symbol;Acc:HGNC:28724]	GO:0000012(single strand break repair);GO:0000166(nucleotide binding);GO:0003906(DNA-(apurinic or apyrimidinic site) endonuclease activity);GO:0004520(endodeoxyribonuclease activity);GO:0004930(G protein-coupled receptor activity);GO:0004983(neuropeptide Y receptor activity);GO:0005515(protein binding);GO:0005634(nucleus);GO:0005654(nucleoplasm);GO:0005694(chromosome);GO:0005737(cytoplasm);GO:000…	NA	EC:4.2.99.18	hsa-miR-30b-3p	m8	-0.098	72	154	-19.69
ciRNA2788	chr2	68490190	68515736	+	1	ciRNA	ENST00000529851	APLF	mRNA	chr2:68490189-68515736	aprataxin and PNKP like factor [Source:HGNC Symbol;Acc:HGNC:28724]	GO:0000012(single strand break repair);GO:0000166(nucleotide binding);GO:0003906(DNA-(apurinic or apyrimidinic site) endonuclease activity);GO:0004520(endodeoxyribonuclease activity);GO:0004930(G protein-coupled receptor activity);GO:0004983(neuropeptide Y receptor activity);GO:0005515(protein binding);GO:0005634(nucleus);GO:0005654(nucleoplasm);GO:0005694(chromosome);GO:0005737(cytoplasm);GO:000…	NA	EC:4.2.99.18	hsa-miR-30b-5p	m8	-0.121	50	162	-17.15
circRNA23863	chr2	68490191	68578003	+	10	circRNA	ENST00000445692	APLF	mRNA	chr2:68467827-68490190	aprataxin and PNKP like factor [Source:HGNC Symbol;Acc:HGNC:28724]	GO:0000012(single strand break repair);GO:0000166(nucleotide binding);GO:0003906(DNA-(apurinic or apyrimidinic site) endonuclease activity);GO:0004520(endodeoxyribonuclease activity);GO:0004930(G protein-coupled receptor activity);GO:0004983(neuropeptide Y receptor activity);GO:0005515(protein binding);GO:0005634(nucleus);GO:0005654(nucleoplasm);GO:0005694(chromosome);GO:0005737(cytoplasm);GO:000…	NA	EC:4.2.99.18	hsa-miR-30c-2-3p	m8	-0.307	98	148	-16.55
ciRNA2788	chr2	68490190	68515736	+	1	ciRNA	ENST00000529851	APLF	mRNA	chr2:68490189-68515736	aprataxin and PNKP like factor [Source:HGNC Symbol;Acc:HGNC:28724]	GO:0000012(single strand break repair);GO:0000166(nucleotide binding);GO:0003906(DNA-(apurinic or apyrimidinic site) endonuclease activity);GO:0004520(endodeoxyribonuclease activity);GO:0004930(G protein-coupled receptor activity);GO:0004983(neuropeptide Y receptor activity);GO:0005515(protein binding);GO:0005634(nucleus);GO:0005654(nucleoplasm);GO:0005694(chromosome);GO:0005737(cytoplasm);GO:000…	NA	EC:4.2.99.18	hsa-miR-30c-5p	m8	-0.121	50	155	-15.28
ciRNA2788	chr2	68490190	68515736	+	1	ciRNA	ENST00000529851	APLF	mRNA	chr2:68490189-68515736	aprataxin and PNKP like factor [Source:HGNC Symbol;Acc:HGNC:28724]	GO:0000012(single strand break repair);GO:0000166(nucleotide binding);GO:0003906(DNA-(apurinic or apyrimidinic site) endonuclease activity);GO:0004520(endodeoxyribonuclease activity);GO:0004930(G protein-coupled receptor activity);GO:0004983(neuropeptide Y receptor activity);GO:0005515(protein binding);GO:0005634(nucleus);GO:0005654(nucleoplasm);GO:0005694(chromosome);GO:0005737(cytoplasm);GO:000…	NA	EC:4.2.99.18	hsa-miR-30d-3p	8mer	-0.1905	75	160	-18.78
circRNA23863	chr2	68490191	68578003	+	10	circRNA	ENST00000445692	APLF	mRNA	chr2:68467827-68490190	aprataxin and PNKP like factor [Source:HGNC Symbol;Acc:HGNC:28724]	GO:0000012(single strand break repair);GO:0000166(nucleotide binding);GO:0003906(DNA-(apurinic or apyrimidinic site) endonuclease activity);GO:0004520(endodeoxyribonuclease activity);GO:0004930(G protein-coupled receptor activity);GO:0004983(neuropeptide Y receptor activity);GO:0005515(protein binding);GO:0005634(nucleus);GO:0005654(nucleoplasm);GO:0005694(chromosome);GO:0005737(cytoplasm);GO:000…	NA	EC:4.2.99.18	hsa-miR-30d-3p	8mer	-0.1763	70	152	-17.88
ciRNA2788	chr2	68490190	68515736	+	1	ciRNA	ENST00000529851	APLF	mRNA	chr2:68490189-68515736	aprataxin and PNKP like factor [Source:HGNC Symbol;Acc:HGNC:28724]	GO:0000012(single strand break repair);GO:0000166(nucleotide binding);GO:0003906(DNA-(apurinic or apyrimidinic site) endonuclease activity);GO:0004520(endodeoxyribonuclease activity);GO:0004930(G protein-coupled receptor activity);GO:0004983(neuropeptide Y receptor activity);GO:0005515(protein binding);GO:0005634(nucleus);GO:0005654(nucleoplasm);GO:0005694(chromosome);GO:0005737(cytoplasm);GO:000…	NA	EC:4.2.99.18	hsa-miR-30d-5p	m8	-0.1365	58	155	-14.61
ciRNA2788	chr2	68490190	68515736	+	1	ciRNA	ENST00000529851	APLF	mRNA	chr2:68490189-68515736	aprataxin and PNKP like factor [Source:HGNC Symbol;Acc:HGNC:28724]	GO:0000012(single strand break repair);GO:0000166(nucleotide binding);GO:0003906(DNA-(apurinic or apyrimidinic site) endonuclease activity);GO:0004520(endodeoxyribonuclease activity);GO:0004930(G protein-coupled receptor activity);GO:0004983(neuropeptide Y receptor activity);GO:0005515(protein binding);GO:0005634(nucleus);GO:0005654(nucleoplasm);GO:0005694(chromosome);GO:0005737(cytoplasm);GO:000…	NA	EC:4.2.99.18	hsa-miR-31-3p	1a	-0.1094	58	144	-15.91
ciRNA2788	chr2	68490190	68515736	+	1	ciRNA	ENST00000529851	APLF	mRNA	chr2:68490189-68515736	aprataxin and PNKP like factor [Source:HGNC Symbol;Acc:HGNC:28724]	GO:0000012(single strand break repair);GO:0000166(nucleotide binding);GO:0003906(DNA-(apurinic or apyrimidinic site) endonuclease activity);GO:0004520(endodeoxyribonuclease activity);GO:0004930(G protein-coupled receptor activity);GO:0004983(neuropeptide Y receptor activity);GO:0005515(protein binding);GO:0005634(nucleus);GO:0005654(nucleoplasm);GO:0005694(chromosome);GO:0005737(cytoplasm);GO:000…	NA	EC:4.2.99.18	hsa-miR-31-5p	8mer	-0.2072	84	154	-23.95
ciRNA2788	chr2	68490190	68515736	+	1	ciRNA	ENST00000529851	APLF	mRNA	chr2:68490189-68515736	aprataxin and PNKP like factor [Source:HGNC Symbol;Acc:HGNC:28724]	GO:0000012(single strand break repair);GO:0000166(nucleotide binding);GO:0003906(DNA-(apurinic or apyrimidinic site) endonuclease activity);GO:0004520(endodeoxyribonuclease activity);GO:0004930(G protein-coupled receptor activity);GO:0004983(neuropeptide Y receptor activity);GO:0005515(protein binding);GO:0005634(nucleus);GO:0005654(nucleoplasm);GO:0005694(chromosome);GO:0005737(cytoplasm);GO:000…	NA	EC:4.2.99.18	hsa-miR-32-3p	m8	-0.1635	77	163	-17.66
ciRNA2788	chr2	68490190	68515736	+	1	ciRNA	ENST00000529851	APLF	mRNA	chr2:68490189-68515736	aprataxin and PNKP like factor [Source:HGNC Symbol;Acc:HGNC:28724]	GO:0000012(single strand break repair);GO:0000166(nucleotide binding);GO:0003906(DNA-(apurinic or apyrimidinic site) endonuclease activity);GO:0004520(endodeoxyribonuclease activity);GO:0004930(G protein-coupled receptor activity);GO:0004983(neuropeptide Y receptor activity);GO:0005515(protein binding);GO:0005634(nucleus);GO:0005654(nucleoplasm);GO:0005694(chromosome);GO:0005737(cytoplasm);GO:000…	NA	EC:4.2.99.18	hsa-miR-32-5p	m8	-0.111	58	161	-16.26
circRNA23863	chr2	68490191	68578003	+	10	circRNA	ENST00000445692	APLF	mRNA	chr2:68467827-68490190	aprataxin and PNKP like factor [Source:HGNC Symbol;Acc:HGNC:28724]	GO:0000012(single strand break repair);GO:0000166(nucleotide binding);GO:0003906(DNA-(apurinic or apyrimidinic site) endonuclease activity);GO:0004520(endodeoxyribonuclease activity);GO:0004930(G protein-coupled receptor activity);GO:0004983(neuropeptide Y receptor activity);GO:0005515(protein binding);GO:0005634(nucleus);GO:0005654(nucleoplasm);GO:0005694(chromosome);GO:0005737(cytoplasm);GO:000…	NA	EC:4.2.99.18	hsa-miR-32-5p	1a	-0.1153	60	161	-16.63
ciRNA2788	chr2	68490190	68515736	+	1	ciRNA	ENST00000529851	APLF	mRNA	chr2:68490189-68515736	aprataxin and PNKP like factor [Source:HGNC Symbol;Acc:HGNC:28724]	GO:0000012(single strand break repair);GO:0000166(nucleotide binding);GO:0003906(DNA-(apurinic or apyrimidinic site) endonuclease activity);GO:0004520(endodeoxyribonuclease activity);GO:0004930(G protein-coupled receptor activity);GO:0004983(neuropeptide Y receptor activity);GO:0005515(protein binding);GO:0005634(nucleus);GO:0005654(nucleoplasm);GO:0005694(chromosome);GO:0005737(cytoplasm);GO:000…	NA	EC:4.2.99.18	hsa-miR-33a-3p	8mer	-0.15525	59	158	-19.26
circRNA23863	chr2	68490191	68578003	+	10	circRNA	ENST00000445692	APLF	mRNA	chr2:68467827-68490190	aprataxin and PNKP like factor [Source:HGNC Symbol;Acc:HGNC:28724]	GO:0000012(single strand break repair);GO:0000166(nucleotide binding);GO:0003906(DNA-(apurinic or apyrimidinic site) endonuclease activity);GO:0004520(endodeoxyribonuclease activity);GO:0004930(G protein-coupled receptor activity);GO:0004983(neuropeptide Y receptor activity);GO:0005515(protein binding);GO:0005634(nucleus);GO:0005654(nucleoplasm);GO:0005694(chromosome);GO:0005737(cytoplasm);GO:000…	NA	EC:4.2.99.18	hsa-miR-33a-3p	m8	-0.1675	64	157	-13.45
ciRNA2788	chr2	68490190	68515736	+	1	ciRNA	ENST00000529851	APLF	mRNA	chr2:68490189-68515736	aprataxin and PNKP like factor [Source:HGNC Symbol;Acc:HGNC:28724]	GO:0000012(single strand break repair);GO:0000166(nucleotide binding);GO:0003906(DNA-(apurinic or apyrimidinic site) endonuclease activity);GO:0004520(endodeoxyribonuclease activity);GO:0004930(G protein-coupled receptor activity);GO:0004983(neuropeptide Y receptor activity);GO:0005515(protein binding);GO:0005634(nucleus);GO:0005654(nucleoplasm);GO:0005694(chromosome);GO:0005737(cytoplasm);GO:000…	NA	EC:4.2.99.18	hsa-miR-33a-5p	m8	-0.2625	93	163	-21.36
circRNA23863	chr2	68490191	68578003	+	10	circRNA	ENST00000445692	APLF	mRNA	chr2:68467827-68490190	aprataxin and PNKP like factor [Source:HGNC Symbol;Acc:HGNC:28724]	GO:0000012(single strand break repair);GO:0000166(nucleotide binding);GO:0003906(DNA-(apurinic or apyrimidinic site) endonuclease activity);GO:0004520(endodeoxyribonuclease activity);GO:0004930(G protein-coupled receptor activity);GO:0004983(neuropeptide Y receptor activity);GO:0005515(protein binding);GO:0005634(nucleus);GO:0005654(nucleoplasm);GO:0005694(chromosome);GO:0005737(cytoplasm);GO:000…	NA	EC:4.2.99.18	hsa-miR-33a-5p	1a	-0.1732	78	152	-17.64
ciRNA2788	chr2	68490190	68515736	+	1	ciRNA	ENST00000529851	APLF	mRNA	chr2:68490189-68515736	aprataxin and PNKP like factor [Source:HGNC Symbol;Acc:HGNC:28724]	GO:0000012(single strand break repair);GO:0000166(nucleotide binding);GO:0003906(DNA-(apurinic or apyrimidinic site) endonuclease activity);GO:0004520(endodeoxyribonuclease activity);GO:0004930(G protein-coupled receptor activity);GO:0004983(neuropeptide Y receptor activity);GO:0005515(protein binding);GO:0005634(nucleus);GO:0005654(nucleoplasm);GO:0005694(chromosome);GO:0005737(cytoplasm);GO:000…	NA	EC:4.2.99.18	hsa-miR-34a-3p	m8	-0.223	86	155	-14.91
circRNA23863	chr2	68490191	68578003	+	10	circRNA	ENST00000445692	APLF	mRNA	chr2:68467827-68490190	aprataxin and PNKP like factor [Source:HGNC Symbol;Acc:HGNC:28724]	GO:0000012(single strand break repair);GO:0000166(nucleotide binding);GO:0003906(DNA-(apurinic or apyrimidinic site) endonuclease activity);GO:0004520(endodeoxyribonuclease activity);GO:0004930(G protein-coupled receptor activity);GO:0004983(neuropeptide Y receptor activity);GO:0005515(protein binding);GO:0005634(nucleus);GO:0005654(nucleoplasm);GO:0005694(chromosome);GO:0005737(cytoplasm);GO:000…	NA	EC:4.2.99.18	hsa-miR-34a-3p	8mer	-0.25825	92	150	-10.22
ciRNA2788	chr2	68490190	68515736	+	1	ciRNA	ENST00000529851	APLF	mRNA	chr2:68490189-68515736	aprataxin and PNKP like factor [Source:HGNC Symbol;Acc:HGNC:28724]	GO:0000012(single strand break repair);GO:0000166(nucleotide binding);GO:0003906(DNA-(apurinic or apyrimidinic site) endonuclease activity);GO:0004520(endodeoxyribonuclease activity);GO:0004930(G protein-coupled receptor activity);GO:0004983(neuropeptide Y receptor activity);GO:0005515(protein binding);GO:0005634(nucleus);GO:0005654(nucleoplasm);GO:0005694(chromosome);GO:0005737(cytoplasm);GO:000…	NA	EC:4.2.99.18	hsa-miR-34a-5p	m8	-0.1995	82	151	-20.58
ciRNA2788	chr2	68490190	68515736	+	1	ciRNA	ENST00000529851	APLF	mRNA	chr2:68490189-68515736	aprataxin and PNKP like factor [Source:HGNC Symbol;Acc:HGNC:28724]	GO:0000012(single strand break repair);GO:0000166(nucleotide binding);GO:0003906(DNA-(apurinic or apyrimidinic site) endonuclease activity);GO:0004520(endodeoxyribonuclease activity);GO:0004930(G protein-coupled receptor activity);GO:0004983(neuropeptide Y receptor activity);GO:0005515(protein binding);GO:0005634(nucleus);GO:0005654(nucleoplasm);GO:0005694(chromosome);GO:0005737(cytoplasm);GO:000…	NA	EC:4.2.99.18	hsa-miR-7-1-3p	8mer	-0.21915	86	142	-15.75
ciRNA2788	chr2	68490190	68515736	+	1	ciRNA	ENST00000529851	APLF	mRNA	chr2:68490189-68515736	aprataxin and PNKP like factor [Source:HGNC Symbol;Acc:HGNC:28724]	GO:0000012(single strand break repair);GO:0000166(nucleotide binding);GO:0003906(DNA-(apurinic or apyrimidinic site) endonuclease activity);GO:0004520(endodeoxyribonuclease activity);GO:0004930(G protein-coupled receptor activity);GO:0004983(neuropeptide Y receptor activity);GO:0005515(protein binding);GO:0005634(nucleus);GO:0005654(nucleoplasm);GO:0005694(chromosome);GO:0005737(cytoplasm);GO:000…	NA	EC:4.2.99.18	hsa-miR-7-2-3p	8mer	-0.21915	86	147	-14.67
ciRNA2788	chr2	68490190	68515736	+	1	ciRNA	ENST00000529851	APLF	mRNA	chr2:68490189-68515736	aprataxin and PNKP like factor [Source:HGNC Symbol;Acc:HGNC:28724]	GO:0000012(single strand break repair);GO:0000166(nucleotide binding);GO:0003906(DNA-(apurinic or apyrimidinic site) endonuclease activity);GO:0004520(endodeoxyribonuclease activity);GO:0004930(G protein-coupled receptor activity);GO:0004983(neuropeptide Y receptor activity);GO:0005515(protein binding);GO:0005634(nucleus);GO:0005654(nucleoplasm);GO:0005694(chromosome);GO:0005737(cytoplasm);GO:000…	NA	EC:4.2.99.18	hsa-miR-92a-1-5p	1a	-0.10185	56	151	-25.09
ciRNA2788	chr2	68490190	68515736	+	1	ciRNA	ENST00000529851	APLF	mRNA	chr2:68490189-68515736	aprataxin and PNKP like factor [Source:HGNC Symbol;Acc:HGNC:28724]	GO:0000012(single strand break repair);GO:0000166(nucleotide binding);GO:0003906(DNA-(apurinic or apyrimidinic site) endonuclease activity);GO:0004520(endodeoxyribonuclease activity);GO:0004930(G protein-coupled receptor activity);GO:0004983(neuropeptide Y receptor activity);GO:0005515(protein binding);GO:0005634(nucleus);GO:0005654(nucleoplasm);GO:0005694(chromosome);GO:0005737(cytoplasm);GO:000…	NA	EC:4.2.99.18	hsa-miR-92a-2-5p	m8	-0.073	58	154	-23.73
ciRNA2788	chr2	68490190	68515736	+	1	ciRNA	ENST00000529851	APLF	mRNA	chr2:68490189-68515736	aprataxin and PNKP like factor [Source:HGNC Symbol;Acc:HGNC:28724]	GO:0000012(single strand break repair);GO:0000166(nucleotide binding);GO:0003906(DNA-(apurinic or apyrimidinic site) endonuclease activity);GO:0004520(endodeoxyribonuclease activity);GO:0004930(G protein-coupled receptor activity);GO:0004983(neuropeptide Y receptor activity);GO:0005515(protein binding);GO:0005634(nucleus);GO:0005654(nucleoplasm);GO:0005694(chromosome);GO:0005737(cytoplasm);GO:000…	NA	EC:4.2.99.18	hsa-miR-92a-3p	m8	-0.111	64	151	-15.46
circRNA23863	chr2	68490191	68578003	+	10	circRNA	ENST00000445692	APLF	mRNA	chr2:68467827-68490190	aprataxin and PNKP like factor [Source:HGNC Symbol;Acc:HGNC:28724]	GO:0000012(single strand break repair);GO:0000166(nucleotide binding);GO:0003906(DNA-(apurinic or apyrimidinic site) endonuclease activity);GO:0004520(endodeoxyribonuclease activity);GO:0004930(G protein-coupled receptor activity);GO:0004983(neuropeptide Y receptor activity);GO:0005515(protein binding);GO:0005634(nucleus);GO:0005654(nucleoplasm);GO:0005694(chromosome);GO:0005737(cytoplasm);GO:000…	NA	EC:4.2.99.18	hsa-miR-92a-3p	1a	-0.08365	52	143	-16.85
ciRNA2788	chr2	68490190	68515736	+	1	ciRNA	ENST00000529851	APLF	mRNA	chr2:68490189-68515736	aprataxin and PNKP like factor [Source:HGNC Symbol;Acc:HGNC:28724]	GO:0000012(single strand break repair);GO:0000166(nucleotide binding);GO:0003906(DNA-(apurinic or apyrimidinic site) endonuclease activity);GO:0004520(endodeoxyribonuclease activity);GO:0004930(G protein-coupled receptor activity);GO:0004983(neuropeptide Y receptor activity);GO:0005515(protein binding);GO:0005634(nucleus);GO:0005654(nucleoplasm);GO:0005694(chromosome);GO:0005737(cytoplasm);GO:000…	NA	EC:4.2.99.18	hsa-miR-93-3p	m8	-0.1185	56	155	-18.31
circRNA23863	chr2	68490191	68578003	+	10	circRNA	ENST00000445692	APLF	mRNA	chr2:68467827-68490190	aprataxin and PNKP like factor [Source:HGNC Symbol;Acc:HGNC:28724]	GO:0000012(single strand break repair);GO:0000166(nucleotide binding);GO:0003906(DNA-(apurinic or apyrimidinic site) endonuclease activity);GO:0004520(endodeoxyribonuclease activity);GO:0004930(G protein-coupled receptor activity);GO:0004983(neuropeptide Y receptor activity);GO:0005515(protein binding);GO:0005634(nucleus);GO:0005654(nucleoplasm);GO:0005694(chromosome);GO:0005737(cytoplasm);GO:000…	NA	EC:4.2.99.18	hsa-miR-93-3p	8mer	-0.36015	96	147	-20.29
ciRNA2788	chr2	68490190	68515736	+	1	ciRNA	ENST00000529851	APLF	mRNA	chr2:68490189-68515736	aprataxin and PNKP like factor [Source:HGNC Symbol;Acc:HGNC:28724]	GO:0000012(single strand break repair);GO:0000166(nucleotide binding);GO:0003906(DNA-(apurinic or apyrimidinic site) endonuclease activity);GO:0004520(endodeoxyribonuclease activity);GO:0004930(G protein-coupled receptor activity);GO:0004983(neuropeptide Y receptor activity);GO:0005515(protein binding);GO:0005634(nucleus);GO:0005654(nucleoplasm);GO:0005694(chromosome);GO:0005737(cytoplasm);GO:000…	NA	EC:4.2.99.18	hsa-miR-93-5p	1a	-0.06875	52	165	-27.7
ciRNA2788	chr2	68490190	68515736	+	1	ciRNA	ENST00000529851	APLF	mRNA	chr2:68490189-68515736	aprataxin and PNKP like factor [Source:HGNC Symbol;Acc:HGNC:28724]	GO:0000012(single strand break repair);GO:0000166(nucleotide binding);GO:0003906(DNA-(apurinic or apyrimidinic site) endonuclease activity);GO:0004520(endodeoxyribonuclease activity);GO:0004930(G protein-coupled receptor activity);GO:0004983(neuropeptide Y receptor activity);GO:0005515(protein binding);GO:0005634(nucleus);GO:0005654(nucleoplasm);GO:0005694(chromosome);GO:0005737(cytoplasm);GO:000…	NA	EC:4.2.99.18	hsa-miR-95-5p	m8	-0.23	82	162	-18.65
circRNA23863	chr2	68490191	68578003	+	10	circRNA	ENST00000445692	APLF	mRNA	chr2:68467827-68490190	aprataxin and PNKP like factor [Source:HGNC Symbol;Acc:HGNC:28724]	GO:0000012(single strand break repair);GO:0000166(nucleotide binding);GO:0003906(DNA-(apurinic or apyrimidinic site) endonuclease activity);GO:0004520(endodeoxyribonuclease activity);GO:0004930(G protein-coupled receptor activity);GO:0004983(neuropeptide Y receptor activity);GO:0005515(protein binding);GO:0005634(nucleus);GO:0005654(nucleoplasm);GO:0005694(chromosome);GO:0005737(cytoplasm);GO:000…	NA	EC:4.2.99.18	hsa-miR-95-5p	8mer	-0.3012	93	169	-21.06
ciRNA2788	chr2	68490190	68515736	+	1	ciRNA	ENST00000529851	APLF	mRNA	chr2:68490189-68515736	aprataxin and PNKP like factor [Source:HGNC Symbol;Acc:HGNC:28724]	GO:0000012(single strand break repair);GO:0000166(nucleotide binding);GO:0003906(DNA-(apurinic or apyrimidinic site) endonuclease activity);GO:0004520(endodeoxyribonuclease activity);GO:0004930(G protein-coupled receptor activity);GO:0004983(neuropeptide Y receptor activity);GO:0005515(protein binding);GO:0005634(nucleus);GO:0005654(nucleoplasm);GO:0005694(chromosome);GO:0005737(cytoplasm);GO:000…	NA	EC:4.2.99.18	hsa-miR-96-3p	m8	-0.175	72	161	-14.41
ciRNA2788	chr2	68490190	68515736	+	1	ciRNA	ENST00000529851	APLF	mRNA	chr2:68490189-68515736	aprataxin and PNKP like factor [Source:HGNC Symbol;Acc:HGNC:28724]	GO:0000012(single strand break repair);GO:0000166(nucleotide binding);GO:0003906(DNA-(apurinic or apyrimidinic site) endonuclease activity);GO:0004520(endodeoxyribonuclease activity);GO:0004930(G protein-coupled receptor activity);GO:0004983(neuropeptide Y receptor activity);GO:0005515(protein binding);GO:0005634(nucleus);GO:0005654(nucleoplasm);GO:0005694(chromosome);GO:0005737(cytoplasm);GO:000…	NA	EC:4.2.99.18	hsa-miR-96-5p	1a	-0.13275	61	143	-17.67
ciRNA2788	chr2	68490190	68515736	+	1	ciRNA	ENST00000529851	APLF	mRNA	chr2:68490189-68515736	aprataxin and PNKP like factor [Source:HGNC Symbol;Acc:HGNC:28724]	GO:0000012(single strand break repair);GO:0000166(nucleotide binding);GO:0003906(DNA-(apurinic or apyrimidinic site) endonuclease activity);GO:0004520(endodeoxyribonuclease activity);GO:0004930(G protein-coupled receptor activity);GO:0004983(neuropeptide Y receptor activity);GO:0005515(protein binding);GO:0005634(nucleus);GO:0005654(nucleoplasm);GO:0005694(chromosome);GO:0005737(cytoplasm);GO:000…	NA	EC:4.2.99.18	hsa-miR-98-3p	m8	-0.204	80	157	-18.9
circRNA23863	chr2	68490191	68578003	+	10	circRNA	ENST00000445692	APLF	mRNA	chr2:68467827-68490190	aprataxin and PNKP like factor [Source:HGNC Symbol;Acc:HGNC:28724]	GO:0000012(single strand break repair);GO:0000166(nucleotide binding);GO:0003906(DNA-(apurinic or apyrimidinic site) endonuclease activity);GO:0004520(endodeoxyribonuclease activity);GO:0004930(G protein-coupled receptor activity);GO:0004983(neuropeptide Y receptor activity);GO:0005515(protein binding);GO:0005634(nucleus);GO:0005654(nucleoplasm);GO:0005694(chromosome);GO:0005737(cytoplasm);GO:000…	NA	EC:4.2.99.18	hsa-miR-98-3p	8mer	-0.54135	99	144	-19.92
ciRNA2788	chr2	68490190	68515736	+	1	ciRNA	ENST00000529851	APLF	mRNA	chr2:68490189-68515736	aprataxin and PNKP like factor [Source:HGNC Symbol;Acc:HGNC:28724]	GO:0000012(single strand break repair);GO:0000166(nucleotide binding);GO:0003906(DNA-(apurinic or apyrimidinic site) endonuclease activity);GO:0004520(endodeoxyribonuclease activity);GO:0004930(G protein-coupled receptor activity);GO:0004983(neuropeptide Y receptor activity);GO:0005515(protein binding);GO:0005634(nucleus);GO:0005654(nucleoplasm);GO:0005694(chromosome);GO:0005737(cytoplasm);GO:000…	NA	EC:4.2.99.18	hsa-miR-98-5p	m8	-0.161	73	157	-18.51
circRNA23863	chr2	68490191	68578003	+	10	circRNA	ENST00000445692	APLF	mRNA	chr2:68467827-68490190	aprataxin and PNKP like factor [Source:HGNC Symbol;Acc:HGNC:28724]	GO:0000012(single strand break repair);GO:0000166(nucleotide binding);GO:0003906(DNA-(apurinic or apyrimidinic site) endonuclease activity);GO:0004520(endodeoxyribonuclease activity);GO:0004930(G protein-coupled receptor activity);GO:0004983(neuropeptide Y receptor activity);GO:0005515(protein binding);GO:0005634(nucleus);GO:0005654(nucleoplasm);GO:0005694(chromosome);GO:0005737(cytoplasm);GO:000…	NA	EC:4.2.99.18	hsa-miR-98-5p	1a	-0.12665	60	148	-18.62
hsa_circ_0002182	chr20	48953556	48969277	+	4	circRNA	ENST00000371917	ARFGEF2	mRNA	chr20:48952884-48953555|chr20:48969277-48971119	ADP ribosylation factor guanine nucleotide exchange factor 2 [Source:HGNC Symbol;Acc:HGNC:15853]	GO:0000139(Golgi membrane);GO:0001881(receptor recycling);GO:0005085(guanyl-nucleotide exchange factor activity);GO:0005086(ARF guanyl-nucleotide exchange factor activity);GO:0005515(protein binding);GO:0005737(cytoplasm);GO:0005768(endosome);GO:0005794(Golgi apparatus);GO:0005802(trans-Golgi network);GO:0005815(microtubule organizing center);GO:0005829(cytosol);GO:0005856(cytoskeleton);GO:000587…	04144(Endocytosis)	NA	hsa-miR-103a-1-5p	8mer	-0.3672	95	153	-16.23
hsa_circ_0002182	chr20	48953556	48969277	+	4	circRNA	ENST00000371917	ARFGEF2	mRNA	chr20:48952884-48953555|chr20:48969277-48971119	ADP ribosylation factor guanine nucleotide exchange factor 2 [Source:HGNC Symbol;Acc:HGNC:15853]	GO:0000139(Golgi membrane);GO:0001881(receptor recycling);GO:0005085(guanyl-nucleotide exchange factor activity);GO:0005086(ARF guanyl-nucleotide exchange factor activity);GO:0005515(protein binding);GO:0005737(cytoplasm);GO:0005768(endosome);GO:0005794(Golgi apparatus);GO:0005802(trans-Golgi network);GO:0005815(microtubule organizing center);GO:0005829(cytosol);GO:0005856(cytoskeleton);GO:000587…	04144(Endocytosis)	NA	hsa-miR-103a-2-5p	8mer	-0.3672	95	153	-14.92
hsa_circ_0002182	chr20	48953556	48969277	+	4	circRNA	ENST00000371917	ARFGEF2	mRNA	chr20:48952884-48953555|chr20:48969277-48971119	ADP ribosylation factor guanine nucleotide exchange factor 2 [Source:HGNC Symbol;Acc:HGNC:15853]	GO:0000139(Golgi membrane);GO:0001881(receptor recycling);GO:0005085(guanyl-nucleotide exchange factor activity);GO:0005086(ARF guanyl-nucleotide exchange factor activity);GO:0005515(protein binding);GO:0005737(cytoplasm);GO:0005768(endosome);GO:0005794(Golgi apparatus);GO:0005802(trans-Golgi network);GO:0005815(microtubule organizing center);GO:0005829(cytosol);GO:0005856(cytoskeleton);GO:000587…	04144(Endocytosis)	NA	hsa-miR-197-3p	8mer	-0.2373	91	161	-26.07
hsa_circ_0002182	chr20	48953556	48969277	+	4	circRNA	ENST00000371917	ARFGEF2	mRNA	chr20:48952884-48953555|chr20:48969277-48971119	ADP ribosylation factor guanine nucleotide exchange factor 2 [Source:HGNC Symbol;Acc:HGNC:15853]	GO:0000139(Golgi membrane);GO:0001881(receptor recycling);GO:0005085(guanyl-nucleotide exchange factor activity);GO:0005086(ARF guanyl-nucleotide exchange factor activity);GO:0005515(protein binding);GO:0005737(cytoplasm);GO:0005768(endosome);GO:0005794(Golgi apparatus);GO:0005802(trans-Golgi network);GO:0005815(microtubule organizing center);GO:0005829(cytosol);GO:0005856(cytoskeleton);GO:000587…	04144(Endocytosis)	NA	hsa-miR-214-5p	8mer	-0.3532	98	146	-22.47
hsa_circ_0002182	chr20	48953556	48969277	+	4	circRNA	ENST00000371917	ARFGEF2	mRNA	chr20:48952884-48953555|chr20:48969277-48971119	ADP ribosylation factor guanine nucleotide exchange factor 2 [Source:HGNC Symbol;Acc:HGNC:15853]	GO:0000139(Golgi membrane);GO:0001881(receptor recycling);GO:0005085(guanyl-nucleotide exchange factor activity);GO:0005086(ARF guanyl-nucleotide exchange factor activity);GO:0005515(protein binding);GO:0005737(cytoplasm);GO:0005768(endosome);GO:0005794(Golgi apparatus);GO:0005802(trans-Golgi network);GO:0005815(microtubule organizing center);GO:0005829(cytosol);GO:0005856(cytoskeleton);GO:000587…	04144(Endocytosis)	NA	hsa-miR-218-5p	m8	-0.179	73	153	-15.07
hsa_circ_0002182	chr20	48953556	48969277	+	4	circRNA	ENST00000371917	ARFGEF2	mRNA	chr20:48952884-48953555|chr20:48969277-48971119	ADP ribosylation factor guanine nucleotide exchange factor 2 [Source:HGNC Symbol;Acc:HGNC:15853]	GO:0000139(Golgi membrane);GO:0001881(receptor recycling);GO:0005085(guanyl-nucleotide exchange factor activity);GO:0005086(ARF guanyl-nucleotide exchange factor activity);GO:0005515(protein binding);GO:0005737(cytoplasm);GO:0005768(endosome);GO:0005794(Golgi apparatus);GO:0005802(trans-Golgi network);GO:0005815(microtubule organizing center);GO:0005829(cytosol);GO:0005856(cytoskeleton);GO:000587…	04144(Endocytosis)	NA	hsa-miR-221-5p	m8	-0.158	80	151	-17.34
hsa_circ_0002182	chr20	48953556	48969277	+	4	circRNA	ENST00000371917	ARFGEF2	mRNA	chr20:48952884-48953555|chr20:48969277-48971119	ADP ribosylation factor guanine nucleotide exchange factor 2 [Source:HGNC Symbol;Acc:HGNC:15853]	GO:0000139(Golgi membrane);GO:0001881(receptor recycling);GO:0005085(guanyl-nucleotide exchange factor activity);GO:0005086(ARF guanyl-nucleotide exchange factor activity);GO:0005515(protein binding);GO:0005737(cytoplasm);GO:0005768(endosome);GO:0005794(Golgi apparatus);GO:0005802(trans-Golgi network);GO:0005815(microtubule organizing center);GO:0005829(cytosol);GO:0005856(cytoskeleton);GO:000587…	04144(Endocytosis)	NA	hsa-miR-29b-2-5p	1a	-0.1282	57	140	-16.22
hsa_circ_0002182	chr20	48953556	48969277	+	4	circRNA	ENST00000371917	ARFGEF2	mRNA	chr20:48952884-48953555|chr20:48969277-48971119	ADP ribosylation factor guanine nucleotide exchange factor 2 [Source:HGNC Symbol;Acc:HGNC:15853]	GO:0000139(Golgi membrane);GO:0001881(receptor recycling);GO:0005085(guanyl-nucleotide exchange factor activity);GO:0005086(ARF guanyl-nucleotide exchange factor activity);GO:0005515(protein binding);GO:0005737(cytoplasm);GO:0005768(endosome);GO:0005794(Golgi apparatus);GO:0005802(trans-Golgi network);GO:0005815(microtubule organizing center);GO:0005829(cytosol);GO:0005856(cytoskeleton);GO:000587…	04144(Endocytosis)	NA	hsa-miR-30c-2-3p	m8	-0.1585	86	153	-20.19
hsa_circ_0002182	chr20	48953556	48969277	+	4	circRNA	ENST00000371917	ARFGEF2	mRNA	chr20:48952884-48953555|chr20:48969277-48971119	ADP ribosylation factor guanine nucleotide exchange factor 2 [Source:HGNC Symbol;Acc:HGNC:15853]	GO:0000139(Golgi membrane);GO:0001881(receptor recycling);GO:0005085(guanyl-nucleotide exchange factor activity);GO:0005086(ARF guanyl-nucleotide exchange factor activity);GO:0005515(protein binding);GO:0005737(cytoplasm);GO:0005768(endosome);GO:0005794(Golgi apparatus);GO:0005802(trans-Golgi network);GO:0005815(microtubule organizing center);GO:0005829(cytosol);GO:0005856(cytoskeleton);GO:000587…	04144(Endocytosis)	NA	hsa-miR-93-3p	8mer	-0.30225	93	159	-17.6
circRNA26290	chr4	147906639	147955374	+	6	circRNA	ENST00000507661	ARHGAP10	mRNA	chr4:147881932-147906638|chr4:147955374-147965024	Rho GTPase activating protein 10 [Source:HGNC Symbol;Acc:HGNC:26099]	GO:0005096(GTPase activator activity);GO:0005515(protein binding);GO:0005737(cytoplasm);GO:0005829(cytosol);GO:0005886(plasma membrane);GO:0007010(cytoskeleton organization);GO:0007165(signal transduction);GO:0016020(membrane);GO:0043066(negative regulation of apoptotic process);GO:0043547(positive regulation of GTPase activity);GO:0048471(perinuclear region of cytoplasm);GO:0051056(regulation of…	05100(Bacterial invasion of epithelial cells)	NA	hsa-let-7c-3p	m8	-0.174	71	151	-16.04
circRNA26290	chr4	147906639	147955374	+	6	circRNA	ENST00000507661	ARHGAP10	mRNA	chr4:147881932-147906638|chr4:147955374-147965024	Rho GTPase activating protein 10 [Source:HGNC Symbol;Acc:HGNC:26099]	GO:0005096(GTPase activator activity);GO:0005515(protein binding);GO:0005737(cytoplasm);GO:0005829(cytosol);GO:0005886(plasma membrane);GO:0007010(cytoskeleton organization);GO:0007165(signal transduction);GO:0016020(membrane);GO:0043066(negative regulation of apoptotic process);GO:0043547(positive regulation of GTPase activity);GO:0048471(perinuclear region of cytoplasm);GO:0051056(regulation of…	05100(Bacterial invasion of epithelial cells)	NA	hsa-miR-124-3p	m8	-0.2445	91	146	-15.72
circRNA26290	chr4	147906639	147955374	+	6	circRNA	ENST00000507661	ARHGAP10	mRNA	chr4:147881932-147906638|chr4:147955374-147965024	Rho GTPase activating protein 10 [Source:HGNC Symbol;Acc:HGNC:26099]	GO:0005096(GTPase activator activity);GO:0005515(protein binding);GO:0005737(cytoplasm);GO:0005829(cytosol);GO:0005886(plasma membrane);GO:0007010(cytoskeleton organization);GO:0007165(signal transduction);GO:0016020(membrane);GO:0043066(negative regulation of apoptotic process);GO:0043547(positive regulation of GTPase activity);GO:0048471(perinuclear region of cytoplasm);GO:0051056(regulation of…	05100(Bacterial invasion of epithelial cells)	NA	hsa-miR-200b-3p	m8	-0.231	85	140	-10.87
circRNA26290	chr4	147906639	147955374	+	6	circRNA	ENST00000507661	ARHGAP10	mRNA	chr4:147881932-147906638|chr4:147955374-147965024	Rho GTPase activating protein 10 [Source:HGNC Symbol;Acc:HGNC:26099]	GO:0005096(GTPase activator activity);GO:0005515(protein binding);GO:0005737(cytoplasm);GO:0005829(cytosol);GO:0005886(plasma membrane);GO:0007010(cytoskeleton organization);GO:0007165(signal transduction);GO:0016020(membrane);GO:0043066(negative regulation of apoptotic process);GO:0043547(positive regulation of GTPase activity);GO:0048471(perinuclear region of cytoplasm);GO:0051056(regulation of…	05100(Bacterial invasion of epithelial cells)	NA	hsa-miR-7-5p	8mer	-0.3782	96	160	-20.9
circRNA26290	chr4	147906639	147955374	+	6	circRNA	ENST00000507661	ARHGAP10	mRNA	chr4:147881932-147906638|chr4:147955374-147965024	Rho GTPase activating protein 10 [Source:HGNC Symbol;Acc:HGNC:26099]	GO:0005096(GTPase activator activity);GO:0005515(protein binding);GO:0005737(cytoplasm);GO:0005829(cytosol);GO:0005886(plasma membrane);GO:0007010(cytoskeleton organization);GO:0007165(signal transduction);GO:0016020(membrane);GO:0043066(negative regulation of apoptotic process);GO:0043547(positive regulation of GTPase activity);GO:0048471(perinuclear region of cytoplasm);GO:0051056(regulation of…	05100(Bacterial invasion of epithelial cells)	NA	hsa-miR-95-3p	8mer	-0.3402	94	150	-20.03
circRNA17620	chr10	31908173	31910563	-	2	circRNA	ENST00000375250	ARHGAP12	mRNA	chr10:31861658-31908172|chr10:31910563-31928683	Rho GTPase activating protein 12 [Source:HGNC Symbol;Acc:HGNC:16348]	GO:0001891(phagocytic cup);GO:0002011(morphogenesis of an epithelial sheet);GO:0005096(GTPase activator activity);GO:0005515(protein binding);GO:0005737(cytoplasm);GO:0005829(cytosol);GO:0006911(phagocytosis, engulfment);GO:0007015(actin filament organization);GO:0007165(signal transduction);GO:0043087(regulation of GTPase activity);GO:0043547(positive regulation of GTPase activity);GO:0051056(re…	NA	NA	hsa-miR-10b-3p	m8	-0.2465	85	158	-15.69
circRNA17620	chr10	31908173	31910563	-	2	circRNA	ENST00000375250	ARHGAP12	mRNA	chr10:31861658-31908172|chr10:31910563-31928683	Rho GTPase activating protein 12 [Source:HGNC Symbol;Acc:HGNC:16348]	GO:0001891(phagocytic cup);GO:0002011(morphogenesis of an epithelial sheet);GO:0005096(GTPase activator activity);GO:0005515(protein binding);GO:0005737(cytoplasm);GO:0005829(cytosol);GO:0006911(phagocytosis, engulfment);GO:0007015(actin filament organization);GO:0007165(signal transduction);GO:0043087(regulation of GTPase activity);GO:0043547(positive regulation of GTPase activity);GO:0051056(re…	NA	NA	hsa-miR-135a-5p	8mer	-0.4672	99	152	-13
circRNA17620	chr10	31908173	31910563	-	2	circRNA	ENST00000375250	ARHGAP12	mRNA	chr10:31861658-31908172|chr10:31910563-31928683	Rho GTPase activating protein 12 [Source:HGNC Symbol;Acc:HGNC:16348]	GO:0001891(phagocytic cup);GO:0002011(morphogenesis of an epithelial sheet);GO:0005096(GTPase activator activity);GO:0005515(protein binding);GO:0005737(cytoplasm);GO:0005829(cytosol);GO:0006911(phagocytosis, engulfment);GO:0007015(actin filament organization);GO:0007165(signal transduction);GO:0043087(regulation of GTPase activity);GO:0043547(positive regulation of GTPase activity);GO:0051056(re…	NA	NA	hsa-miR-20a-3p	8mer	-0.4031	97	150	-12.68
circRNA17620	chr10	31908173	31910563	-	2	circRNA	ENST00000375250	ARHGAP12	mRNA	chr10:31861658-31908172|chr10:31910563-31928683	Rho GTPase activating protein 12 [Source:HGNC Symbol;Acc:HGNC:16348]	GO:0001891(phagocytic cup);GO:0002011(morphogenesis of an epithelial sheet);GO:0005096(GTPase activator activity);GO:0005515(protein binding);GO:0005737(cytoplasm);GO:0005829(cytosol);GO:0006911(phagocytosis, engulfment);GO:0007015(actin filament organization);GO:0007165(signal transduction);GO:0043087(regulation of GTPase activity);GO:0043547(positive regulation of GTPase activity);GO:0051056(re…	NA	NA	hsa-miR-23a-3p	8mer	-0.39225	96	150	-14.36
circRNA17620	chr10	31908173	31910563	-	2	circRNA	ENST00000375250	ARHGAP12	mRNA	chr10:31861658-31908172|chr10:31910563-31928683	Rho GTPase activating protein 12 [Source:HGNC Symbol;Acc:HGNC:16348]	GO:0001891(phagocytic cup);GO:0002011(morphogenesis of an epithelial sheet);GO:0005096(GTPase activator activity);GO:0005515(protein binding);GO:0005737(cytoplasm);GO:0005829(cytosol);GO:0006911(phagocytosis, engulfment);GO:0007015(actin filament organization);GO:0007165(signal transduction);GO:0043087(regulation of GTPase activity);GO:0043547(positive regulation of GTPase activity);GO:0051056(re…	NA	NA	hsa-miR-23b-3p	8mer	-0.39225	96	140	-11.15
circRNA17620	chr10	31908173	31910563	-	2	circRNA	ENST00000375250	ARHGAP12	mRNA	chr10:31861658-31908172|chr10:31910563-31928683	Rho GTPase activating protein 12 [Source:HGNC Symbol;Acc:HGNC:16348]	GO:0001891(phagocytic cup);GO:0002011(morphogenesis of an epithelial sheet);GO:0005096(GTPase activator activity);GO:0005515(protein binding);GO:0005737(cytoplasm);GO:0005829(cytosol);GO:0006911(phagocytosis, engulfment);GO:0007015(actin filament organization);GO:0007165(signal transduction);GO:0043087(regulation of GTPase activity);GO:0043547(positive regulation of GTPase activity);GO:0051056(re…	NA	NA	hsa-miR-26a-1-3p	m8	-0.135	60	152	-19.29
circRNA17620	chr10	31908173	31910563	-	2	circRNA	ENST00000375250	ARHGAP12	mRNA	chr10:31861658-31908172|chr10:31910563-31928683	Rho GTPase activating protein 12 [Source:HGNC Symbol;Acc:HGNC:16348]	GO:0001891(phagocytic cup);GO:0002011(morphogenesis of an epithelial sheet);GO:0005096(GTPase activator activity);GO:0005515(protein binding);GO:0005737(cytoplasm);GO:0005829(cytosol);GO:0006911(phagocytosis, engulfment);GO:0007015(actin filament organization);GO:0007165(signal transduction);GO:0043087(regulation of GTPase activity);GO:0043547(positive regulation of GTPase activity);GO:0051056(re…	NA	NA	hsa-miR-30c-2-3p	m8	-0.2385	95	169	-29.37
circRNA17620	chr10	31908173	31910563	-	2	circRNA	ENST00000375250	ARHGAP12	mRNA	chr10:31861658-31908172|chr10:31910563-31928683	Rho GTPase activating protein 12 [Source:HGNC Symbol;Acc:HGNC:16348]	GO:0001891(phagocytic cup);GO:0002011(morphogenesis of an epithelial sheet);GO:0005096(GTPase activator activity);GO:0005515(protein binding);GO:0005737(cytoplasm);GO:0005829(cytosol);GO:0006911(phagocytosis, engulfment);GO:0007015(actin filament organization);GO:0007165(signal transduction);GO:0043087(regulation of GTPase activity);GO:0043547(positive regulation of GTPase activity);GO:0051056(re…	NA	NA	hsa-miR-96-5p	1a	-0.1122	51	148	-15.22
hsa_circ_0067745	chr3	154217869	154240579	+	3	circRNA	ENST00000356448	ARHGEF26	mRNA	chr3:154194718-154217868|chr3:154240579-154253115	Rho guanine nucleotide exchange factor 26 [Source:HGNC Symbol;Acc:HGNC:24490]	GO:0001726(ruffle);GO:0001886(endothelial cell morphogenesis);GO:0005085(guanyl-nucleotide exchange factor activity);GO:0005089(Rho guanyl-nucleotide exchange factor activity);GO:0005515(protein binding);GO:0005829(cytosol);GO:0007186(G protein-coupled receptor signaling pathway);GO:0042995(cell projection);GO:0043065(positive regulation of apoptotic process);GO:0051056(regulation of small GTPase…	05100(Bacterial invasion of epithelial cells)	NA	hsa-miR-128-3p	m8	-0.2195	89	140	-11.75
hsa_circ_0067745	chr3	154217869	154240579	+	3	circRNA	ENST00000356448	ARHGEF26	mRNA	chr3:154194718-154217868|chr3:154240579-154253115	Rho guanine nucleotide exchange factor 26 [Source:HGNC Symbol;Acc:HGNC:24490]	GO:0001726(ruffle);GO:0001886(endothelial cell morphogenesis);GO:0005085(guanyl-nucleotide exchange factor activity);GO:0005089(Rho guanyl-nucleotide exchange factor activity);GO:0005515(protein binding);GO:0005829(cytosol);GO:0007186(G protein-coupled receptor signaling pathway);GO:0042995(cell projection);GO:0043065(positive regulation of apoptotic process);GO:0051056(regulation of small GTPase…	05100(Bacterial invasion of epithelial cells)	NA	hsa-miR-130a-5p	m8	-0.173	69	147	-13.09
hsa_circ_0067745	chr3	154217869	154240579	+	3	circRNA	ENST00000356448	ARHGEF26	mRNA	chr3:154194718-154217868|chr3:154240579-154253115	Rho guanine nucleotide exchange factor 26 [Source:HGNC Symbol;Acc:HGNC:24490]	GO:0001726(ruffle);GO:0001886(endothelial cell morphogenesis);GO:0005085(guanyl-nucleotide exchange factor activity);GO:0005089(Rho guanyl-nucleotide exchange factor activity);GO:0005515(protein binding);GO:0005829(cytosol);GO:0007186(G protein-coupled receptor signaling pathway);GO:0042995(cell projection);GO:0043065(positive regulation of apoptotic process);GO:0051056(regulation of small GTPase…	05100(Bacterial invasion of epithelial cells)	NA	hsa-miR-216a-3p	m8	-0.235	91	153	-16.11
hsa_circ_0067745	chr3	154217869	154240579	+	3	circRNA	ENST00000356448	ARHGEF26	mRNA	chr3:154194718-154217868|chr3:154240579-154253115	Rho guanine nucleotide exchange factor 26 [Source:HGNC Symbol;Acc:HGNC:24490]	GO:0001726(ruffle);GO:0001886(endothelial cell morphogenesis);GO:0005085(guanyl-nucleotide exchange factor activity);GO:0005089(Rho guanyl-nucleotide exchange factor activity);GO:0005515(protein binding);GO:0005829(cytosol);GO:0007186(G protein-coupled receptor signaling pathway);GO:0042995(cell projection);GO:0043065(positive regulation of apoptotic process);GO:0051056(regulation of small GTPase…	05100(Bacterial invasion of epithelial cells)	NA	hsa-miR-22-5p	8mer	-0.27825	86	152	-19.45
hsa_circ_0067745	chr3	154217869	154240579	+	3	circRNA	ENST00000356448	ARHGEF26	mRNA	chr3:154194718-154217868|chr3:154240579-154253115	Rho guanine nucleotide exchange factor 26 [Source:HGNC Symbol;Acc:HGNC:24490]	GO:0001726(ruffle);GO:0001886(endothelial cell morphogenesis);GO:0005085(guanyl-nucleotide exchange factor activity);GO:0005089(Rho guanyl-nucleotide exchange factor activity);GO:0005515(protein binding);GO:0005829(cytosol);GO:0007186(G protein-coupled receptor signaling pathway);GO:0042995(cell projection);GO:0043065(positive regulation of apoptotic process);GO:0051056(regulation of small GTPase…	05100(Bacterial invasion of epithelial cells)	NA	hsa-miR-26b-3p	m8	-0.1565	62	145	-15.29
hsa_circ_0006135	chr3	93995874	94003908	+	2	circRNA	ENST00000471138	ARL13B	mRNA	chr3:93980482-93995873|chr3:94003908-94035330	ADP ribosylation factor like GTPase 13B [Source:HGNC Symbol;Acc:HGNC:25419]	GO:0000166(nucleotide binding);GO:0001947(heart looping);GO:0005515(protein binding);GO:0005525(GTP binding);GO:0005886(plasma membrane);GO:0005929(cilium);GO:0005930(axoneme);GO:0007224(smoothened signaling pathway);GO:0007368(determination of left/right symmetry);GO:0009953(dorsal/ventral pattern formation);GO:0010226(response to lithium ion);GO:0016020(membrane);GO:0021532(neural tube patterni…	NA	NA	hsa-miR-10b-3p	m8	-0.1655	66	145	-12.57
hsa_circ_0006135	chr3	93995874	94003908	+	2	circRNA	ENST00000471138	ARL13B	mRNA	chr3:93980482-93995873|chr3:94003908-94035330	ADP ribosylation factor like GTPase 13B [Source:HGNC Symbol;Acc:HGNC:25419]	GO:0000166(nucleotide binding);GO:0001947(heart looping);GO:0005515(protein binding);GO:0005525(GTP binding);GO:0005886(plasma membrane);GO:0005929(cilium);GO:0005930(axoneme);GO:0007224(smoothened signaling pathway);GO:0007368(determination of left/right symmetry);GO:0009953(dorsal/ventral pattern formation);GO:0010226(response to lithium ion);GO:0016020(membrane);GO:0021532(neural tube patterni…	NA	NA	hsa-miR-130a-5p	m8	-0.156	62	146	-19.06
hsa_circ_0006135	chr3	93995874	94003908	+	2	circRNA	ENST00000471138	ARL13B	mRNA	chr3:93980482-93995873|chr3:94003908-94035330	ADP ribosylation factor like GTPase 13B [Source:HGNC Symbol;Acc:HGNC:25419]	GO:0000166(nucleotide binding);GO:0001947(heart looping);GO:0005515(protein binding);GO:0005525(GTP binding);GO:0005886(plasma membrane);GO:0005929(cilium);GO:0005930(axoneme);GO:0007224(smoothened signaling pathway);GO:0007368(determination of left/right symmetry);GO:0009953(dorsal/ventral pattern formation);GO:0010226(response to lithium ion);GO:0016020(membrane);GO:0021532(neural tube patterni…	NA	NA	hsa-miR-204-5p	8mer	-0.30205	92	146	-14.43
hsa_circ_0006135	chr3	93995874	94003908	+	2	circRNA	ENST00000471138	ARL13B	mRNA	chr3:93980482-93995873|chr3:94003908-94035330	ADP ribosylation factor like GTPase 13B [Source:HGNC Symbol;Acc:HGNC:25419]	GO:0000166(nucleotide binding);GO:0001947(heart looping);GO:0005515(protein binding);GO:0005525(GTP binding);GO:0005886(plasma membrane);GO:0005929(cilium);GO:0005930(axoneme);GO:0007224(smoothened signaling pathway);GO:0007368(determination of left/right symmetry);GO:0009953(dorsal/ventral pattern formation);GO:0010226(response to lithium ion);GO:0016020(membrane);GO:0021532(neural tube patterni…	NA	NA	hsa-miR-211-5p	8mer	-0.3041	92	146	-14.86
hsa_circ_0006135	chr3	93995874	94003908	+	2	circRNA	ENST00000471138	ARL13B	mRNA	chr3:93980482-93995873|chr3:94003908-94035330	ADP ribosylation factor like GTPase 13B [Source:HGNC Symbol;Acc:HGNC:25419]	GO:0000166(nucleotide binding);GO:0001947(heart looping);GO:0005515(protein binding);GO:0005525(GTP binding);GO:0005886(plasma membrane);GO:0005929(cilium);GO:0005930(axoneme);GO:0007224(smoothened signaling pathway);GO:0007368(determination of left/right symmetry);GO:0009953(dorsal/ventral pattern formation);GO:0010226(response to lithium ion);GO:0016020(membrane);GO:0021532(neural tube patterni…	NA	NA	hsa-miR-221-3p	m8	-0.1625	74	152	-19.16
hsa_circ_0006135	chr3	93995874	94003908	+	2	circRNA	ENST00000471138	ARL13B	mRNA	chr3:93980482-93995873|chr3:94003908-94035330	ADP ribosylation factor like GTPase 13B [Source:HGNC Symbol;Acc:HGNC:25419]	GO:0000166(nucleotide binding);GO:0001947(heart looping);GO:0005515(protein binding);GO:0005525(GTP binding);GO:0005886(plasma membrane);GO:0005929(cilium);GO:0005930(axoneme);GO:0007224(smoothened signaling pathway);GO:0007368(determination of left/right symmetry);GO:0009953(dorsal/ventral pattern formation);GO:0010226(response to lithium ion);GO:0016020(membrane);GO:0021532(neural tube patterni…	NA	NA	hsa-miR-222-3p	m8	-0.1625	74	152	-21.77
hsa_circ_0006135	chr3	93995874	94003908	+	2	circRNA	ENST00000471138	ARL13B	mRNA	chr3:93980482-93995873|chr3:94003908-94035330	ADP ribosylation factor like GTPase 13B [Source:HGNC Symbol;Acc:HGNC:25419]	GO:0000166(nucleotide binding);GO:0001947(heart looping);GO:0005515(protein binding);GO:0005525(GTP binding);GO:0005886(plasma membrane);GO:0005929(cilium);GO:0005930(axoneme);GO:0007224(smoothened signaling pathway);GO:0007368(determination of left/right symmetry);GO:0009953(dorsal/ventral pattern formation);GO:0010226(response to lithium ion);GO:0016020(membrane);GO:0021532(neural tube patterni…	NA	NA	hsa-miR-224-5p	1a	-0.1531	68	154	-18.29
hsa_circ_0006135	chr3	93995874	94003908	+	2	circRNA	ENST00000471138	ARL13B	mRNA	chr3:93980482-93995873|chr3:94003908-94035330	ADP ribosylation factor like GTPase 13B [Source:HGNC Symbol;Acc:HGNC:25419]	GO:0000166(nucleotide binding);GO:0001947(heart looping);GO:0005515(protein binding);GO:0005525(GTP binding);GO:0005886(plasma membrane);GO:0005929(cilium);GO:0005930(axoneme);GO:0007224(smoothened signaling pathway);GO:0007368(determination of left/right symmetry);GO:0009953(dorsal/ventral pattern formation);GO:0010226(response to lithium ion);GO:0016020(membrane);GO:0021532(neural tube patterni…	NA	NA	hsa-miR-28-5p	8mer	-0.4233	99	152	-15.96
hsa_circ_0006135	chr3	93995874	94003908	+	2	circRNA	ENST00000471138	ARL13B	mRNA	chr3:93980482-93995873|chr3:94003908-94035330	ADP ribosylation factor like GTPase 13B [Source:HGNC Symbol;Acc:HGNC:25419]	GO:0000166(nucleotide binding);GO:0001947(heart looping);GO:0005515(protein binding);GO:0005525(GTP binding);GO:0005886(plasma membrane);GO:0005929(cilium);GO:0005930(axoneme);GO:0007224(smoothened signaling pathway);GO:0007368(determination of left/right symmetry);GO:0009953(dorsal/ventral pattern formation);GO:0010226(response to lithium ion);GO:0016020(membrane);GO:0021532(neural tube patterni…	NA	NA	hsa-miR-7-1-3p	m8	-0.228	88	141	-13
hsa_circ_0006135	chr3	93995874	94003908	+	2	circRNA	ENST00000471138	ARL13B	mRNA	chr3:93980482-93995873|chr3:94003908-94035330	ADP ribosylation factor like GTPase 13B [Source:HGNC Symbol;Acc:HGNC:25419]	GO:0000166(nucleotide binding);GO:0001947(heart looping);GO:0005515(protein binding);GO:0005525(GTP binding);GO:0005886(plasma membrane);GO:0005929(cilium);GO:0005930(axoneme);GO:0007224(smoothened signaling pathway);GO:0007368(determination of left/right symmetry);GO:0009953(dorsal/ventral pattern formation);GO:0010226(response to lithium ion);GO:0016020(membrane);GO:0021532(neural tube patterni…	NA	NA	hsa-miR-7-2-3p	m8	-0.2125	85	145	-13.82
hsa_circ_0001005	chr2	53693884	53750941	-	7	circRNA	ENST00000406053	ASB3	mRNA	chr2:53604915-53693883|chr2:53750941-53765376	ankyrin repeat and SOCS box containing 3 [Source:HGNC Symbol;Acc:HGNC:16013]	GO:0005515(protein binding);GO:0005829(cytosol);GO:0016567(protein ubiquitination);GO:0030315(T-tubule);GO:0035556(intracellular signal transduction);GO:0036371(protein localization to T-tubule);GO:0043687(post-translational protein modification);GO:0055117(regulation of cardiac muscle contraction)	NA	NA	hsa-miR-15a-5p	m8	-0.186	75	151	-14.41
hsa_circ_0001005	chr2	53693884	53750941	-	7	circRNA	ENST00000406053	ASB3	mRNA	chr2:53604915-53693883|chr2:53750941-53765376	ankyrin repeat and SOCS box containing 3 [Source:HGNC Symbol;Acc:HGNC:16013]	GO:0005515(protein binding);GO:0005829(cytosol);GO:0016567(protein ubiquitination);GO:0030315(T-tubule);GO:0035556(intracellular signal transduction);GO:0036371(protein localization to T-tubule);GO:0043687(post-translational protein modification);GO:0055117(regulation of cardiac muscle contraction)	NA	NA	hsa-miR-15b-5p	m8	-0.186	76	147	-12.44
hsa_circ_0001005	chr2	53693884	53750941	-	7	circRNA	ENST00000406053	ASB3	mRNA	chr2:53604915-53693883|chr2:53750941-53765376	ankyrin repeat and SOCS box containing 3 [Source:HGNC Symbol;Acc:HGNC:16013]	GO:0005515(protein binding);GO:0005829(cytosol);GO:0016567(protein ubiquitination);GO:0030315(T-tubule);GO:0035556(intracellular signal transduction);GO:0036371(protein localization to T-tubule);GO:0043687(post-translational protein modification);GO:0055117(regulation of cardiac muscle contraction)	NA	NA	hsa-miR-16-5p	m8	-0.186	75	154	-16.13
hsa_circ_0001005	chr2	53693884	53750941	-	7	circRNA	ENST00000406053	ASB3	mRNA	chr2:53604915-53693883|chr2:53750941-53765376	ankyrin repeat and SOCS box containing 3 [Source:HGNC Symbol;Acc:HGNC:16013]	GO:0005515(protein binding);GO:0005829(cytosol);GO:0016567(protein ubiquitination);GO:0030315(T-tubule);GO:0035556(intracellular signal transduction);GO:0036371(protein localization to T-tubule);GO:0043687(post-translational protein modification);GO:0055117(regulation of cardiac muscle contraction)	NA	NA	hsa-miR-205-3p	1a	-0.1292	58	143	-14.07
hsa_circ_0001005	chr2	53693884	53750941	-	7	circRNA	ENST00000406053	ASB3	mRNA	chr2:53604915-53693883|chr2:53750941-53765376	ankyrin repeat and SOCS box containing 3 [Source:HGNC Symbol;Acc:HGNC:16013]	GO:0005515(protein binding);GO:0005829(cytosol);GO:0016567(protein ubiquitination);GO:0030315(T-tubule);GO:0035556(intracellular signal transduction);GO:0036371(protein localization to T-tubule);GO:0043687(post-translational protein modification);GO:0055117(regulation of cardiac muscle contraction)	NA	NA	hsa-miR-216a-3p	1a	-0.1293	65	140	-20.41
hsa_circ_0001005	chr2	53693884	53750941	-	7	circRNA	ENST00000406053	ASB3	mRNA	chr2:53604915-53693883|chr2:53750941-53765376	ankyrin repeat and SOCS box containing 3 [Source:HGNC Symbol;Acc:HGNC:16013]	GO:0005515(protein binding);GO:0005829(cytosol);GO:0016567(protein ubiquitination);GO:0030315(T-tubule);GO:0035556(intracellular signal transduction);GO:0036371(protein localization to T-tubule);GO:0043687(post-translational protein modification);GO:0055117(regulation of cardiac muscle contraction)	NA	NA	hsa-miR-218-1-3p	m8	-0.282	91	146	-22.5
hsa_circ_0001005	chr2	53693884	53750941	-	7	circRNA	ENST00000406053	ASB3	mRNA	chr2:53604915-53693883|chr2:53750941-53765376	ankyrin repeat and SOCS box containing 3 [Source:HGNC Symbol;Acc:HGNC:16013]	GO:0005515(protein binding);GO:0005829(cytosol);GO:0016567(protein ubiquitination);GO:0030315(T-tubule);GO:0035556(intracellular signal transduction);GO:0036371(protein localization to T-tubule);GO:0043687(post-translational protein modification);GO:0055117(regulation of cardiac muscle contraction)	NA	NA	hsa-miR-218-2-3p	8mer	-0.37315	97	147	-13.33
hsa_circ_0001005	chr2	53693884	53750941	-	7	circRNA	ENST00000406053	ASB3	mRNA	chr2:53604915-53693883|chr2:53750941-53765376	ankyrin repeat and SOCS box containing 3 [Source:HGNC Symbol;Acc:HGNC:16013]	GO:0005515(protein binding);GO:0005829(cytosol);GO:0016567(protein ubiquitination);GO:0030315(T-tubule);GO:0035556(intracellular signal transduction);GO:0036371(protein localization to T-tubule);GO:0043687(post-translational protein modification);GO:0055117(regulation of cardiac muscle contraction)	NA	NA	hsa-miR-218-5p	8mer	-0.4722	99	142	-13.91
hsa_circ_0001005	chr2	53693884	53750941	-	7	circRNA	ENST00000406053	ASB3	mRNA	chr2:53604915-53693883|chr2:53750941-53765376	ankyrin repeat and SOCS box containing 3 [Source:HGNC Symbol;Acc:HGNC:16013]	GO:0005515(protein binding);GO:0005829(cytosol);GO:0016567(protein ubiquitination);GO:0030315(T-tubule);GO:0035556(intracellular signal transduction);GO:0036371(protein localization to T-tubule);GO:0043687(post-translational protein modification);GO:0055117(regulation of cardiac muscle contraction)	NA	NA	hsa-miR-221-5p	8mer	-0.4053	98	156	-18.37
hsa_circ_0001005	chr2	53693884	53750941	-	7	circRNA	ENST00000406053	ASB3	mRNA	chr2:53604915-53693883|chr2:53750941-53765376	ankyrin repeat and SOCS box containing 3 [Source:HGNC Symbol;Acc:HGNC:16013]	GO:0005515(protein binding);GO:0005829(cytosol);GO:0016567(protein ubiquitination);GO:0030315(T-tubule);GO:0035556(intracellular signal transduction);GO:0036371(protein localization to T-tubule);GO:0043687(post-translational protein modification);GO:0055117(regulation of cardiac muscle contraction)	NA	NA	hsa-miR-25-3p	m8	-0.219	90	149	-14.8
hsa_circ_0001005	chr2	53693884	53750941	-	7	circRNA	ENST00000406053	ASB3	mRNA	chr2:53604915-53693883|chr2:53750941-53765376	ankyrin repeat and SOCS box containing 3 [Source:HGNC Symbol;Acc:HGNC:16013]	GO:0005515(protein binding);GO:0005829(cytosol);GO:0016567(protein ubiquitination);GO:0030315(T-tubule);GO:0035556(intracellular signal transduction);GO:0036371(protein localization to T-tubule);GO:0043687(post-translational protein modification);GO:0055117(regulation of cardiac muscle contraction)	NA	NA	hsa-miR-27a-3p	m8	-0.1325	61	140	-13.11
hsa_circ_0001005	chr2	53693884	53750941	-	7	circRNA	ENST00000406053	ASB3	mRNA	chr2:53604915-53693883|chr2:53750941-53765376	ankyrin repeat and SOCS box containing 3 [Source:HGNC Symbol;Acc:HGNC:16013]	GO:0005515(protein binding);GO:0005829(cytosol);GO:0016567(protein ubiquitination);GO:0030315(T-tubule);GO:0035556(intracellular signal transduction);GO:0036371(protein localization to T-tubule);GO:0043687(post-translational protein modification);GO:0055117(regulation of cardiac muscle contraction)	NA	NA	hsa-miR-27a-5p	m8	-0.18	87	148	-17.76
hsa_circ_0001005	chr2	53693884	53750941	-	7	circRNA	ENST00000406053	ASB3	mRNA	chr2:53604915-53693883|chr2:53750941-53765376	ankyrin repeat and SOCS box containing 3 [Source:HGNC Symbol;Acc:HGNC:16013]	GO:0005515(protein binding);GO:0005829(cytosol);GO:0016567(protein ubiquitination);GO:0030315(T-tubule);GO:0035556(intracellular signal transduction);GO:0036371(protein localization to T-tubule);GO:0043687(post-translational protein modification);GO:0055117(regulation of cardiac muscle contraction)	NA	NA	hsa-miR-27b-3p	m8	-0.1325	61	140	-12.69
hsa_circ_0001005	chr2	53693884	53750941	-	7	circRNA	ENST00000406053	ASB3	mRNA	chr2:53604915-53693883|chr2:53750941-53765376	ankyrin repeat and SOCS box containing 3 [Source:HGNC Symbol;Acc:HGNC:16013]	GO:0005515(protein binding);GO:0005829(cytosol);GO:0016567(protein ubiquitination);GO:0030315(T-tubule);GO:0035556(intracellular signal transduction);GO:0036371(protein localization to T-tubule);GO:0043687(post-translational protein modification);GO:0055117(regulation of cardiac muscle contraction)	NA	NA	hsa-miR-32-5p	m8	-0.219	88	155	-10.9
hsa_circ_0001005	chr2	53693884	53750941	-	7	circRNA	ENST00000406053	ASB3	mRNA	chr2:53604915-53693883|chr2:53750941-53765376	ankyrin repeat and SOCS box containing 3 [Source:HGNC Symbol;Acc:HGNC:16013]	GO:0005515(protein binding);GO:0005829(cytosol);GO:0016567(protein ubiquitination);GO:0030315(T-tubule);GO:0035556(intracellular signal transduction);GO:0036371(protein localization to T-tubule);GO:0043687(post-translational protein modification);GO:0055117(regulation of cardiac muscle contraction)	NA	NA	hsa-miR-92a-3p	m8	-0.188	86	140	-11.26
hsa_circ_0001005	chr2	53693884	53750941	-	7	circRNA	ENST00000406053	ASB3	mRNA	chr2:53604915-53693883|chr2:53750941-53765376	ankyrin repeat and SOCS box containing 3 [Source:HGNC Symbol;Acc:HGNC:16013]	GO:0005515(protein binding);GO:0005829(cytosol);GO:0016567(protein ubiquitination);GO:0030315(T-tubule);GO:0035556(intracellular signal transduction);GO:0036371(protein localization to T-tubule);GO:0043687(post-translational protein modification);GO:0055117(regulation of cardiac muscle contraction)	NA	NA	hsa-miR-93-3p	m8	-0.149	68	155	-19.01
hsa_circ_0083952	chr8	38110379	38110833	+	2	circRNA	ENST00000545394	ASH2L	mRNA	chr8:38106444-38110378|chr8:38110833-38114191	ASH2 like, histone lysine methyltransferase complex subunit [Source:HGNC Symbol;Acc:HGNC:744]	GO:0000976(transcription regulatory region sequence-specific DNA binding);GO:0003677(DNA binding);GO:0005515(protein binding);GO:0005634(nucleus);GO:0005654(nucleoplasm);GO:0005719(nuclear euchromatin);GO:0006325(chromatin organization);GO:0006974(cellular response to DNA damage stimulus);GO:0008013(beta-catenin binding);GO:0008284(positive regulation of cell population proliferation);GO:0030097(…	04934(Cushing syndrome)	NA	hsa-miR-105-3p	8mer	-0.41325	97	161	-19.28
hsa_circ_0083952	chr8	38110379	38110833	+	2	circRNA	ENST00000545394	ASH2L	mRNA	chr8:38106444-38110378|chr8:38110833-38114191	ASH2 like, histone lysine methyltransferase complex subunit [Source:HGNC Symbol;Acc:HGNC:744]	GO:0000976(transcription regulatory region sequence-specific DNA binding);GO:0003677(DNA binding);GO:0005515(protein binding);GO:0005634(nucleus);GO:0005654(nucleoplasm);GO:0005719(nuclear euchromatin);GO:0006325(chromatin organization);GO:0006974(cellular response to DNA damage stimulus);GO:0008013(beta-catenin binding);GO:0008284(positive regulation of cell population proliferation);GO:0030097(…	04934(Cushing syndrome)	NA	hsa-miR-106a-3p	8mer	-0.4333	99	156	-11.07
hsa_circ_0083952	chr8	38110379	38110833	+	2	circRNA	ENST00000545394	ASH2L	mRNA	chr8:38106444-38110378|chr8:38110833-38114191	ASH2 like, histone lysine methyltransferase complex subunit [Source:HGNC Symbol;Acc:HGNC:744]	GO:0000976(transcription regulatory region sequence-specific DNA binding);GO:0003677(DNA binding);GO:0005515(protein binding);GO:0005634(nucleus);GO:0005654(nucleoplasm);GO:0005719(nuclear euchromatin);GO:0006325(chromatin organization);GO:0006974(cellular response to DNA damage stimulus);GO:0008013(beta-catenin binding);GO:0008284(positive regulation of cell population proliferation);GO:0030097(…	04934(Cushing syndrome)	NA	hsa-miR-124-3p	8mer	-0.40915	98	141	-14.89
hsa_circ_0003039	chr1	161778244	161784096	+	3	circRNA	ENST00000367942	ATF6	mRNA	chr1:161766442-161778243|chr1:161784096-161791407	activating transcription factor 6 [Source:HGNC Symbol;Acc:HGNC:791]	GO:0000139(Golgi membrane);GO:0000790(nuclear chromatin);GO:0000976(transcription regulatory region sequence-specific DNA binding);GO:0000977(RNA polymerase II regulatory region sequence-specific DNA binding);GO:0000978(RNA polymerase II cis-regulatory region sequence-specific DNA binding);GO:0000981(DNA-binding transcription factor activity, RNA polymerase II-specific);GO:0001228(DNA-binding tra…	04141(Protein processing in endoplasmic reticulum);05010(Alzheimer disease)	NA	hsa-let-7a-2-3p	m8	-0.245	89	140	-13.5
hsa_circ_0003039	chr1	161778244	161784096	+	3	circRNA	ENST00000367942	ATF6	mRNA	chr1:161766442-161778243|chr1:161784096-161791407	activating transcription factor 6 [Source:HGNC Symbol;Acc:HGNC:791]	GO:0000139(Golgi membrane);GO:0000790(nuclear chromatin);GO:0000976(transcription regulatory region sequence-specific DNA binding);GO:0000977(RNA polymerase II regulatory region sequence-specific DNA binding);GO:0000978(RNA polymerase II cis-regulatory region sequence-specific DNA binding);GO:0000981(DNA-binding transcription factor activity, RNA polymerase II-specific);GO:0001228(DNA-binding tra…	04141(Protein processing in endoplasmic reticulum);05010(Alzheimer disease)	NA	hsa-let-7g-3p	m8	-0.276	92	141	-15.25
hsa_circ_0003039	chr1	161778244	161784096	+	3	circRNA	ENST00000367942	ATF6	mRNA	chr1:161766442-161778243|chr1:161784096-161791407	activating transcription factor 6 [Source:HGNC Symbol;Acc:HGNC:791]	GO:0000139(Golgi membrane);GO:0000790(nuclear chromatin);GO:0000976(transcription regulatory region sequence-specific DNA binding);GO:0000977(RNA polymerase II regulatory region sequence-specific DNA binding);GO:0000978(RNA polymerase II cis-regulatory region sequence-specific DNA binding);GO:0000981(DNA-binding transcription factor activity, RNA polymerase II-specific);GO:0001228(DNA-binding tra…	04141(Protein processing in endoplasmic reticulum);05010(Alzheimer disease)	NA	hsa-miR-139-3p	m8	-0.23	96	148	-17.43
hsa_circ_0003039	chr1	161778244	161784096	+	3	circRNA	ENST00000367942	ATF6	mRNA	chr1:161766442-161778243|chr1:161784096-161791407	activating transcription factor 6 [Source:HGNC Symbol;Acc:HGNC:791]	GO:0000139(Golgi membrane);GO:0000790(nuclear chromatin);GO:0000976(transcription regulatory region sequence-specific DNA binding);GO:0000977(RNA polymerase II regulatory region sequence-specific DNA binding);GO:0000978(RNA polymerase II cis-regulatory region sequence-specific DNA binding);GO:0000981(DNA-binding transcription factor activity, RNA polymerase II-specific);GO:0001228(DNA-binding tra…	04141(Protein processing in endoplasmic reticulum);05010(Alzheimer disease)	NA	hsa-miR-181a-2-3p	8mer	-0.2963	92	159	-25
hsa_circ_0003039	chr1	161778244	161784096	+	3	circRNA	ENST00000367942	ATF6	mRNA	chr1:161766442-161778243|chr1:161784096-161791407	activating transcription factor 6 [Source:HGNC Symbol;Acc:HGNC:791]	GO:0000139(Golgi membrane);GO:0000790(nuclear chromatin);GO:0000976(transcription regulatory region sequence-specific DNA binding);GO:0000977(RNA polymerase II regulatory region sequence-specific DNA binding);GO:0000978(RNA polymerase II cis-regulatory region sequence-specific DNA binding);GO:0000981(DNA-binding transcription factor activity, RNA polymerase II-specific);GO:0001228(DNA-binding tra…	04141(Protein processing in endoplasmic reticulum);05010(Alzheimer disease)	NA	hsa-miR-219a-1-3p	8mer	-0.4122	97	151	-17.47
hsa_circ_0002372	X	139814878	139826823	-	4	circRNA	ENST00000370557	ATP11C	mRNA	X:139804599-139814877|X:139826823-139932015	ATPase phospholipid transporting 11C [Source:HGNC Symbol;Acc:HGNC:13554]	GO:0000166(nucleotide binding);GO:0000287(magnesium ion binding);GO:0002329(pre-B cell differentiation);GO:0005515(protein binding);GO:0005524(ATP binding);GO:0005765(lysosomal membrane);GO:0005783(endoplasmic reticulum);GO:0005789(endoplasmic reticulum membrane);GO:0005802(trans-Golgi network);GO:0005886(plasma membrane);GO:0006869(lipid transport);GO:0015914(phospholipid transport);GO:0016020(m…	NA	EC:7.6.2.1	hsa-let-7c-3p	m8	-0.135	56	140	-10.26
hsa_circ_0002372	X	139814878	139826823	-	4	circRNA	ENST00000370557	ATP11C	mRNA	X:139804599-139814877|X:139826823-139932015	ATPase phospholipid transporting 11C [Source:HGNC Symbol;Acc:HGNC:13554]	GO:0000166(nucleotide binding);GO:0000287(magnesium ion binding);GO:0002329(pre-B cell differentiation);GO:0005515(protein binding);GO:0005524(ATP binding);GO:0005765(lysosomal membrane);GO:0005783(endoplasmic reticulum);GO:0005789(endoplasmic reticulum membrane);GO:0005802(trans-Golgi network);GO:0005886(plasma membrane);GO:0006869(lipid transport);GO:0015914(phospholipid transport);GO:0016020(m…	NA	EC:7.6.2.1	hsa-miR-106a-3p	m8	-0.3225	95	172	-19.44
hsa_circ_0002372	X	139814878	139826823	-	4	circRNA	ENST00000370557	ATP11C	mRNA	X:139804599-139814877|X:139826823-139932015	ATPase phospholipid transporting 11C [Source:HGNC Symbol;Acc:HGNC:13554]	GO:0000166(nucleotide binding);GO:0000287(magnesium ion binding);GO:0002329(pre-B cell differentiation);GO:0005515(protein binding);GO:0005524(ATP binding);GO:0005765(lysosomal membrane);GO:0005783(endoplasmic reticulum);GO:0005789(endoplasmic reticulum membrane);GO:0005802(trans-Golgi network);GO:0005886(plasma membrane);GO:0006869(lipid transport);GO:0015914(phospholipid transport);GO:0016020(m…	NA	EC:7.6.2.1	hsa-miR-10b-3p	m8	-0.296	89	151	-16.89
hsa_circ_0002372	X	139814878	139826823	-	4	circRNA	ENST00000370557	ATP11C	mRNA	X:139804599-139814877|X:139826823-139932015	ATPase phospholipid transporting 11C [Source:HGNC Symbol;Acc:HGNC:13554]	GO:0000166(nucleotide binding);GO:0000287(magnesium ion binding);GO:0002329(pre-B cell differentiation);GO:0005515(protein binding);GO:0005524(ATP binding);GO:0005765(lysosomal membrane);GO:0005783(endoplasmic reticulum);GO:0005789(endoplasmic reticulum membrane);GO:0005802(trans-Golgi network);GO:0005886(plasma membrane);GO:0006869(lipid transport);GO:0015914(phospholipid transport);GO:0016020(m…	NA	EC:7.6.2.1	hsa-miR-210-3p	m8	-0.135	68	168	-29.17
hsa_circ_0002372	X	139814878	139826823	-	4	circRNA	ENST00000370557	ATP11C	mRNA	X:139804599-139814877|X:139826823-139932015	ATPase phospholipid transporting 11C [Source:HGNC Symbol;Acc:HGNC:13554]	GO:0000166(nucleotide binding);GO:0000287(magnesium ion binding);GO:0002329(pre-B cell differentiation);GO:0005515(protein binding);GO:0005524(ATP binding);GO:0005765(lysosomal membrane);GO:0005783(endoplasmic reticulum);GO:0005789(endoplasmic reticulum membrane);GO:0005802(trans-Golgi network);GO:0005886(plasma membrane);GO:0006869(lipid transport);GO:0015914(phospholipid transport);GO:0016020(m…	NA	EC:7.6.2.1	hsa-miR-26a-1-3p	m8	-0.3075	94	151	-10.65
hsa_circ_0002372	X	139814878	139826823	-	4	circRNA	ENST00000370557	ATP11C	mRNA	X:139804599-139814877|X:139826823-139932015	ATPase phospholipid transporting 11C [Source:HGNC Symbol;Acc:HGNC:13554]	GO:0000166(nucleotide binding);GO:0000287(magnesium ion binding);GO:0002329(pre-B cell differentiation);GO:0005515(protein binding);GO:0005524(ATP binding);GO:0005765(lysosomal membrane);GO:0005783(endoplasmic reticulum);GO:0005789(endoplasmic reticulum membrane);GO:0005802(trans-Golgi network);GO:0005886(plasma membrane);GO:0006869(lipid transport);GO:0015914(phospholipid transport);GO:0016020(m…	NA	EC:7.6.2.1	hsa-miR-30c-2-3p	8mer	-0.49615	99	149	-14.63
hsa_circ_0043837	chr17	42498924	42501304	+	3	circRNA	ENST00000393829	ATP6V0A1	mRNA	chr17:42495716-42498923|chr17:42501304-42507519	ATPase H+ transporting V0 subunit a1 [Source:HGNC Symbol;Acc:HGNC:865]	GO:0000220(vacuolar proton-transporting V-type ATPase, V0 domain);GO:0005515(protein binding);GO:0005737(cytoplasm);GO:0005765(lysosomal membrane);GO:0005794(Golgi apparatus);GO:0005829(cytosol);GO:0005886(plasma membrane);GO:0006811(ion transport);GO:0007035(vacuolar acidification);GO:0008286(insulin receptor signaling pathway);GO:0010008(endosome membrane);GO:0015078(proton transmembrane transp…	00190(Oxidative phosphorylation);04142(Lysosome);04145(Phagosome);04721(Synaptic vesicle cycle);04966(Collecting duct acid secretion);05110(Vibrio cholerae infection);05120(Epithelial cell signaling in Helicobacter pylori infection);05152(Tuberculosis);05165(Human papillomavirus infection);05323(Rheumatoid arthritis)	NA	hsa-miR-103a-1-5p	m8	-0.1595	63	146	-12.06
hsa_circ_0043837	chr17	42498924	42501304	+	3	circRNA	ENST00000393829	ATP6V0A1	mRNA	chr17:42495716-42498923|chr17:42501304-42507519	ATPase H+ transporting V0 subunit a1 [Source:HGNC Symbol;Acc:HGNC:865]	GO:0000220(vacuolar proton-transporting V-type ATPase, V0 domain);GO:0005515(protein binding);GO:0005737(cytoplasm);GO:0005765(lysosomal membrane);GO:0005794(Golgi apparatus);GO:0005829(cytosol);GO:0005886(plasma membrane);GO:0006811(ion transport);GO:0007035(vacuolar acidification);GO:0008286(insulin receptor signaling pathway);GO:0010008(endosome membrane);GO:0015078(proton transmembrane transp…	00190(Oxidative phosphorylation);04142(Lysosome);04145(Phagosome);04721(Synaptic vesicle cycle);04966(Collecting duct acid secretion);05110(Vibrio cholerae infection);05120(Epithelial cell signaling in Helicobacter pylori infection);05152(Tuberculosis);05165(Human papillomavirus infection);05323(Rheumatoid arthritis)	NA	hsa-miR-103a-3p	m8	-0.198	82	147	-20.07
hsa_circ_0043837	chr17	42498924	42501304	+	3	circRNA	ENST00000393829	ATP6V0A1	mRNA	chr17:42495716-42498923|chr17:42501304-42507519	ATPase H+ transporting V0 subunit a1 [Source:HGNC Symbol;Acc:HGNC:865]	GO:0000220(vacuolar proton-transporting V-type ATPase, V0 domain);GO:0005515(protein binding);GO:0005737(cytoplasm);GO:0005765(lysosomal membrane);GO:0005794(Golgi apparatus);GO:0005829(cytosol);GO:0005886(plasma membrane);GO:0006811(ion transport);GO:0007035(vacuolar acidification);GO:0008286(insulin receptor signaling pathway);GO:0010008(endosome membrane);GO:0015078(proton transmembrane transp…	00190(Oxidative phosphorylation);04142(Lysosome);04145(Phagosome);04721(Synaptic vesicle cycle);04966(Collecting duct acid secretion);05110(Vibrio cholerae infection);05120(Epithelial cell signaling in Helicobacter pylori infection);05152(Tuberculosis);05165(Human papillomavirus infection);05323(Rheumatoid arthritis)	NA	hsa-miR-105-5p	m8	-0.338	95	151	-16.56
hsa_circ_0043837	chr17	42498924	42501304	+	3	circRNA	ENST00000393829	ATP6V0A1	mRNA	chr17:42495716-42498923|chr17:42501304-42507519	ATPase H+ transporting V0 subunit a1 [Source:HGNC Symbol;Acc:HGNC:865]	GO:0000220(vacuolar proton-transporting V-type ATPase, V0 domain);GO:0005515(protein binding);GO:0005737(cytoplasm);GO:0005765(lysosomal membrane);GO:0005794(Golgi apparatus);GO:0005829(cytosol);GO:0005886(plasma membrane);GO:0006811(ion transport);GO:0007035(vacuolar acidification);GO:0008286(insulin receptor signaling pathway);GO:0010008(endosome membrane);GO:0015078(proton transmembrane transp…	00190(Oxidative phosphorylation);04142(Lysosome);04145(Phagosome);04721(Synaptic vesicle cycle);04966(Collecting duct acid secretion);05110(Vibrio cholerae infection);05120(Epithelial cell signaling in Helicobacter pylori infection);05152(Tuberculosis);05165(Human papillomavirus infection);05323(Rheumatoid arthritis)	NA	hsa-miR-107	m8	-0.198	82	147	-20.07
hsa_circ_0043837	chr17	42498924	42501304	+	3	circRNA	ENST00000393829	ATP6V0A1	mRNA	chr17:42495716-42498923|chr17:42501304-42507519	ATPase H+ transporting V0 subunit a1 [Source:HGNC Symbol;Acc:HGNC:865]	GO:0000220(vacuolar proton-transporting V-type ATPase, V0 domain);GO:0005515(protein binding);GO:0005737(cytoplasm);GO:0005765(lysosomal membrane);GO:0005794(Golgi apparatus);GO:0005829(cytosol);GO:0005886(plasma membrane);GO:0006811(ion transport);GO:0007035(vacuolar acidification);GO:0008286(insulin receptor signaling pathway);GO:0010008(endosome membrane);GO:0015078(proton transmembrane transp…	00190(Oxidative phosphorylation);04142(Lysosome);04145(Phagosome);04721(Synaptic vesicle cycle);04966(Collecting duct acid secretion);05110(Vibrio cholerae infection);05120(Epithelial cell signaling in Helicobacter pylori infection);05152(Tuberculosis);05165(Human papillomavirus infection);05323(Rheumatoid arthritis)	NA	hsa-miR-130a-3p	8mer	-0.2932	94	154	-16.63
hsa_circ_0043837	chr17	42498924	42501304	+	3	circRNA	ENST00000393829	ATP6V0A1	mRNA	chr17:42495716-42498923|chr17:42501304-42507519	ATPase H+ transporting V0 subunit a1 [Source:HGNC Symbol;Acc:HGNC:865]	GO:0000220(vacuolar proton-transporting V-type ATPase, V0 domain);GO:0005515(protein binding);GO:0005737(cytoplasm);GO:0005765(lysosomal membrane);GO:0005794(Golgi apparatus);GO:0005829(cytosol);GO:0005886(plasma membrane);GO:0006811(ion transport);GO:0007035(vacuolar acidification);GO:0008286(insulin receptor signaling pathway);GO:0010008(endosome membrane);GO:0015078(proton transmembrane transp…	00190(Oxidative phosphorylation);04142(Lysosome);04145(Phagosome);04721(Synaptic vesicle cycle);04966(Collecting duct acid secretion);05110(Vibrio cholerae infection);05120(Epithelial cell signaling in Helicobacter pylori infection);05152(Tuberculosis);05165(Human papillomavirus infection);05323(Rheumatoid arthritis)	NA	hsa-miR-15a-5p	m8	-0.2335	86	151	-17.83
hsa_circ_0043837	chr17	42498924	42501304	+	3	circRNA	ENST00000393829	ATP6V0A1	mRNA	chr17:42495716-42498923|chr17:42501304-42507519	ATPase H+ transporting V0 subunit a1 [Source:HGNC Symbol;Acc:HGNC:865]	GO:0000220(vacuolar proton-transporting V-type ATPase, V0 domain);GO:0005515(protein binding);GO:0005737(cytoplasm);GO:0005765(lysosomal membrane);GO:0005794(Golgi apparatus);GO:0005829(cytosol);GO:0005886(plasma membrane);GO:0006811(ion transport);GO:0007035(vacuolar acidification);GO:0008286(insulin receptor signaling pathway);GO:0010008(endosome membrane);GO:0015078(proton transmembrane transp…	00190(Oxidative phosphorylation);04142(Lysosome);04145(Phagosome);04721(Synaptic vesicle cycle);04966(Collecting duct acid secretion);05110(Vibrio cholerae infection);05120(Epithelial cell signaling in Helicobacter pylori infection);05152(Tuberculosis);05165(Human papillomavirus infection);05323(Rheumatoid arthritis)	NA	hsa-miR-15b-5p	m8	-0.2335	86	154	-21.72
hsa_circ_0043837	chr17	42498924	42501304	+	3	circRNA	ENST00000393829	ATP6V0A1	mRNA	chr17:42495716-42498923|chr17:42501304-42507519	ATPase H+ transporting V0 subunit a1 [Source:HGNC Symbol;Acc:HGNC:865]	GO:0000220(vacuolar proton-transporting V-type ATPase, V0 domain);GO:0005515(protein binding);GO:0005737(cytoplasm);GO:0005765(lysosomal membrane);GO:0005794(Golgi apparatus);GO:0005829(cytosol);GO:0005886(plasma membrane);GO:0006811(ion transport);GO:0007035(vacuolar acidification);GO:0008286(insulin receptor signaling pathway);GO:0010008(endosome membrane);GO:0015078(proton transmembrane transp…	00190(Oxidative phosphorylation);04142(Lysosome);04145(Phagosome);04721(Synaptic vesicle cycle);04966(Collecting duct acid secretion);05110(Vibrio cholerae infection);05120(Epithelial cell signaling in Helicobacter pylori infection);05152(Tuberculosis);05165(Human papillomavirus infection);05323(Rheumatoid arthritis)	NA	hsa-miR-16-5p	m8	-0.218	82	145	-13.64
hsa_circ_0043837	chr17	42498924	42501304	+	3	circRNA	ENST00000393829	ATP6V0A1	mRNA	chr17:42495716-42498923|chr17:42501304-42507519	ATPase H+ transporting V0 subunit a1 [Source:HGNC Symbol;Acc:HGNC:865]	GO:0000220(vacuolar proton-transporting V-type ATPase, V0 domain);GO:0005515(protein binding);GO:0005737(cytoplasm);GO:0005765(lysosomal membrane);GO:0005794(Golgi apparatus);GO:0005829(cytosol);GO:0005886(plasma membrane);GO:0006811(ion transport);GO:0007035(vacuolar acidification);GO:0008286(insulin receptor signaling pathway);GO:0010008(endosome membrane);GO:0015078(proton transmembrane transp…	00190(Oxidative phosphorylation);04142(Lysosome);04145(Phagosome);04721(Synaptic vesicle cycle);04966(Collecting duct acid secretion);05110(Vibrio cholerae infection);05120(Epithelial cell signaling in Helicobacter pylori infection);05152(Tuberculosis);05165(Human papillomavirus infection);05323(Rheumatoid arthritis)	NA	hsa-miR-198	8mer	-0.4572	99	146	-15.69
hsa_circ_0043837	chr17	42498924	42501304	+	3	circRNA	ENST00000393829	ATP6V0A1	mRNA	chr17:42495716-42498923|chr17:42501304-42507519	ATPase H+ transporting V0 subunit a1 [Source:HGNC Symbol;Acc:HGNC:865]	GO:0000220(vacuolar proton-transporting V-type ATPase, V0 domain);GO:0005515(protein binding);GO:0005737(cytoplasm);GO:0005765(lysosomal membrane);GO:0005794(Golgi apparatus);GO:0005829(cytosol);GO:0005886(plasma membrane);GO:0006811(ion transport);GO:0007035(vacuolar acidification);GO:0008286(insulin receptor signaling pathway);GO:0010008(endosome membrane);GO:0015078(proton transmembrane transp…	00190(Oxidative phosphorylation);04142(Lysosome);04145(Phagosome);04721(Synaptic vesicle cycle);04966(Collecting duct acid secretion);05110(Vibrio cholerae infection);05120(Epithelial cell signaling in Helicobacter pylori infection);05152(Tuberculosis);05165(Human papillomavirus infection);05323(Rheumatoid arthritis)	NA	hsa-miR-199a-3p	m8	-0.1625	71	150	-16.5
hsa_circ_0043837	chr17	42498924	42501304	+	3	circRNA	ENST00000393829	ATP6V0A1	mRNA	chr17:42495716-42498923|chr17:42501304-42507519	ATPase H+ transporting V0 subunit a1 [Source:HGNC Symbol;Acc:HGNC:865]	GO:0000220(vacuolar proton-transporting V-type ATPase, V0 domain);GO:0005515(protein binding);GO:0005737(cytoplasm);GO:0005765(lysosomal membrane);GO:0005794(Golgi apparatus);GO:0005829(cytosol);GO:0005886(plasma membrane);GO:0006811(ion transport);GO:0007035(vacuolar acidification);GO:0008286(insulin receptor signaling pathway);GO:0010008(endosome membrane);GO:0015078(proton transmembrane transp…	00190(Oxidative phosphorylation);04142(Lysosome);04145(Phagosome);04721(Synaptic vesicle cycle);04966(Collecting duct acid secretion);05110(Vibrio cholerae infection);05120(Epithelial cell signaling in Helicobacter pylori infection);05152(Tuberculosis);05165(Human papillomavirus infection);05323(Rheumatoid arthritis)	NA	hsa-miR-199b-3p	m8	-0.1625	71	150	-16.5
hsa_circ_0043837	chr17	42498924	42501304	+	3	circRNA	ENST00000393829	ATP6V0A1	mRNA	chr17:42495716-42498923|chr17:42501304-42507519	ATPase H+ transporting V0 subunit a1 [Source:HGNC Symbol;Acc:HGNC:865]	GO:0000220(vacuolar proton-transporting V-type ATPase, V0 domain);GO:0005515(protein binding);GO:0005737(cytoplasm);GO:0005765(lysosomal membrane);GO:0005794(Golgi apparatus);GO:0005829(cytosol);GO:0005886(plasma membrane);GO:0006811(ion transport);GO:0007035(vacuolar acidification);GO:0008286(insulin receptor signaling pathway);GO:0010008(endosome membrane);GO:0015078(proton transmembrane transp…	00190(Oxidative phosphorylation);04142(Lysosome);04145(Phagosome);04721(Synaptic vesicle cycle);04966(Collecting duct acid secretion);05110(Vibrio cholerae infection);05120(Epithelial cell signaling in Helicobacter pylori infection);05152(Tuberculosis);05165(Human papillomavirus infection);05323(Rheumatoid arthritis)	NA	hsa-miR-200b-3p	m8	-0.176	70	156	-12.83
hsa_circ_0043837	chr17	42498924	42501304	+	3	circRNA	ENST00000393829	ATP6V0A1	mRNA	chr17:42495716-42498923|chr17:42501304-42507519	ATPase H+ transporting V0 subunit a1 [Source:HGNC Symbol;Acc:HGNC:865]	GO:0000220(vacuolar proton-transporting V-type ATPase, V0 domain);GO:0005515(protein binding);GO:0005737(cytoplasm);GO:0005765(lysosomal membrane);GO:0005794(Golgi apparatus);GO:0005829(cytosol);GO:0005886(plasma membrane);GO:0006811(ion transport);GO:0007035(vacuolar acidification);GO:0008286(insulin receptor signaling pathway);GO:0010008(endosome membrane);GO:0015078(proton transmembrane transp…	00190(Oxidative phosphorylation);04142(Lysosome);04145(Phagosome);04721(Synaptic vesicle cycle);04966(Collecting duct acid secretion);05110(Vibrio cholerae infection);05120(Epithelial cell signaling in Helicobacter pylori infection);05152(Tuberculosis);05165(Human papillomavirus infection);05323(Rheumatoid arthritis)	NA	hsa-miR-203a-3p	m8	-0.206	85	150	-13.05
hsa_circ_0043837	chr17	42498924	42501304	+	3	circRNA	ENST00000393829	ATP6V0A1	mRNA	chr17:42495716-42498923|chr17:42501304-42507519	ATPase H+ transporting V0 subunit a1 [Source:HGNC Symbol;Acc:HGNC:865]	GO:0000220(vacuolar proton-transporting V-type ATPase, V0 domain);GO:0005515(protein binding);GO:0005737(cytoplasm);GO:0005765(lysosomal membrane);GO:0005794(Golgi apparatus);GO:0005829(cytosol);GO:0005886(plasma membrane);GO:0006811(ion transport);GO:0007035(vacuolar acidification);GO:0008286(insulin receptor signaling pathway);GO:0010008(endosome membrane);GO:0015078(proton transmembrane transp…	00190(Oxidative phosphorylation);04142(Lysosome);04145(Phagosome);04721(Synaptic vesicle cycle);04966(Collecting duct acid secretion);05110(Vibrio cholerae infection);05120(Epithelial cell signaling in Helicobacter pylori infection);05152(Tuberculosis);05165(Human papillomavirus infection);05323(Rheumatoid arthritis)	NA	hsa-miR-205-3p	8mer	-0.40615	98	154	-14.25
hsa_circ_0043837	chr17	42498924	42501304	+	3	circRNA	ENST00000393829	ATP6V0A1	mRNA	chr17:42495716-42498923|chr17:42501304-42507519	ATPase H+ transporting V0 subunit a1 [Source:HGNC Symbol;Acc:HGNC:865]	GO:0000220(vacuolar proton-transporting V-type ATPase, V0 domain);GO:0005515(protein binding);GO:0005737(cytoplasm);GO:0005765(lysosomal membrane);GO:0005794(Golgi apparatus);GO:0005829(cytosol);GO:0005886(plasma membrane);GO:0006811(ion transport);GO:0007035(vacuolar acidification);GO:0008286(insulin receptor signaling pathway);GO:0010008(endosome membrane);GO:0015078(proton transmembrane transp…	00190(Oxidative phosphorylation);04142(Lysosome);04145(Phagosome);04721(Synaptic vesicle cycle);04966(Collecting duct acid secretion);05110(Vibrio cholerae infection);05120(Epithelial cell signaling in Helicobacter pylori infection);05152(Tuberculosis);05165(Human papillomavirus infection);05323(Rheumatoid arthritis)	NA	hsa-miR-223-3p	m8	-0.1915	76	151	-14.46
circRNA9130	chr18	79096477	79176907	+	7	circRNA	ENST00000307671	ATP9B	mRNA	chr18:79069529-79096476|chr18:79176907-79193183	ATPase phospholipid transporting 9B (putative) [Source:HGNC Symbol;Acc:HGNC:13541]	GO:0000166(nucleotide binding);GO:0000287(magnesium ion binding);GO:0005524(ATP binding);GO:0005768(endosome);GO:0005794(Golgi apparatus);GO:0005802(trans-Golgi network);GO:0005886(plasma membrane);GO:0006890(retrograde vesicle-mediated transport, Golgi to endoplasmic reticulum);GO:0006897(endocytosis);GO:0015914(phospholipid transport);GO:0016020(membrane);GO:0016021(integral component of membra…	NA	EC:7.6.2.1	hsa-miR-100-3p	8mer	-0.38445	98	161	-13.19
circRNA9130	chr18	79096477	79176907	+	7	circRNA	ENST00000307671	ATP9B	mRNA	chr18:79069529-79096476|chr18:79176907-79193183	ATPase phospholipid transporting 9B (putative) [Source:HGNC Symbol;Acc:HGNC:13541]	GO:0000166(nucleotide binding);GO:0000287(magnesium ion binding);GO:0005524(ATP binding);GO:0005768(endosome);GO:0005794(Golgi apparatus);GO:0005802(trans-Golgi network);GO:0005886(plasma membrane);GO:0006890(retrograde vesicle-mediated transport, Golgi to endoplasmic reticulum);GO:0006897(endocytosis);GO:0015914(phospholipid transport);GO:0016020(membrane);GO:0016021(integral component of membra…	NA	EC:7.6.2.1	hsa-miR-105-5p	m8	-0.2205	85	174	-23.29
circRNA9130	chr18	79096477	79176907	+	7	circRNA	ENST00000307671	ATP9B	mRNA	chr18:79069529-79096476|chr18:79176907-79193183	ATPase phospholipid transporting 9B (putative) [Source:HGNC Symbol;Acc:HGNC:13541]	GO:0000166(nucleotide binding);GO:0000287(magnesium ion binding);GO:0005524(ATP binding);GO:0005768(endosome);GO:0005794(Golgi apparatus);GO:0005802(trans-Golgi network);GO:0005886(plasma membrane);GO:0006890(retrograde vesicle-mediated transport, Golgi to endoplasmic reticulum);GO:0006897(endocytosis);GO:0015914(phospholipid transport);GO:0016020(membrane);GO:0016021(integral component of membra…	NA	EC:7.6.2.1	hsa-miR-130a-5p	m8	-0.156	62	162	-14.16
circRNA9130	chr18	79096477	79176907	+	7	circRNA	ENST00000307671	ATP9B	mRNA	chr18:79069529-79096476|chr18:79176907-79193183	ATPase phospholipid transporting 9B (putative) [Source:HGNC Symbol;Acc:HGNC:13541]	GO:0000166(nucleotide binding);GO:0000287(magnesium ion binding);GO:0005524(ATP binding);GO:0005768(endosome);GO:0005794(Golgi apparatus);GO:0005802(trans-Golgi network);GO:0005886(plasma membrane);GO:0006890(retrograde vesicle-mediated transport, Golgi to endoplasmic reticulum);GO:0006897(endocytosis);GO:0015914(phospholipid transport);GO:0016020(membrane);GO:0016021(integral component of membra…	NA	EC:7.6.2.1	hsa-miR-133a-5p	8mer	-0.35415	96	153	-17.26
circRNA9130	chr18	79096477	79176907	+	7	circRNA	ENST00000307671	ATP9B	mRNA	chr18:79069529-79096476|chr18:79176907-79193183	ATPase phospholipid transporting 9B (putative) [Source:HGNC Symbol;Acc:HGNC:13541]	GO:0000166(nucleotide binding);GO:0000287(magnesium ion binding);GO:0005524(ATP binding);GO:0005768(endosome);GO:0005794(Golgi apparatus);GO:0005802(trans-Golgi network);GO:0005886(plasma membrane);GO:0006890(retrograde vesicle-mediated transport, Golgi to endoplasmic reticulum);GO:0006897(endocytosis);GO:0015914(phospholipid transport);GO:0016020(membrane);GO:0016021(integral component of membra…	NA	EC:7.6.2.1	hsa-miR-21-3p	m8	-0.308	95	165	-24.27
circRNA9130	chr18	79096477	79176907	+	7	circRNA	ENST00000307671	ATP9B	mRNA	chr18:79069529-79096476|chr18:79176907-79193183	ATPase phospholipid transporting 9B (putative) [Source:HGNC Symbol;Acc:HGNC:13541]	GO:0000166(nucleotide binding);GO:0000287(magnesium ion binding);GO:0005524(ATP binding);GO:0005768(endosome);GO:0005794(Golgi apparatus);GO:0005802(trans-Golgi network);GO:0005886(plasma membrane);GO:0006890(retrograde vesicle-mediated transport, Golgi to endoplasmic reticulum);GO:0006897(endocytosis);GO:0015914(phospholipid transport);GO:0016020(membrane);GO:0016021(integral component of membra…	NA	EC:7.6.2.1	hsa-miR-217-3p	m8	-0.1945	76	153	-11.41
circRNA9130	chr18	79096477	79176907	+	7	circRNA	ENST00000307671	ATP9B	mRNA	chr18:79069529-79096476|chr18:79176907-79193183	ATPase phospholipid transporting 9B (putative) [Source:HGNC Symbol;Acc:HGNC:13541]	GO:0000166(nucleotide binding);GO:0000287(magnesium ion binding);GO:0005524(ATP binding);GO:0005768(endosome);GO:0005794(Golgi apparatus);GO:0005802(trans-Golgi network);GO:0005886(plasma membrane);GO:0006890(retrograde vesicle-mediated transport, Golgi to endoplasmic reticulum);GO:0006897(endocytosis);GO:0015914(phospholipid transport);GO:0016020(membrane);GO:0016021(integral component of membra…	NA	EC:7.6.2.1	hsa-miR-223-3p	m8	-0.194	77	152	-14.36
hsa_circ_0001246	chr22	45700282	45740538	+	6	circRNA	ENST00000381061	ATXN10	mRNA	chr22:45693078-45700281|chr22:45740538-45806958	ataxin 10 [Source:HGNC Symbol;Acc:HGNC:10549]	GO:0005515(protein binding);GO:0005615(extracellular space);GO:0005737(cytoplasm);GO:0005829(cytosol);GO:0005886(plasma membrane);GO:0007399(nervous system development);GO:0016020(membrane);GO:0019899(enzyme binding);GO:0030425(dendrite);GO:0031175(neuron projection development);GO:0042802(identical protein binding);GO:0043025(neuronal cell body);GO:0048471(perinuclear region of cytoplasm);GO:006…	NA	NA	hsa-miR-135a-5p	m8	-0.221	83	147	-14.39
hsa_circ_0001246	chr22	45700282	45740538	+	6	circRNA	ENST00000381061	ATXN10	mRNA	chr22:45693078-45700281|chr22:45740538-45806958	ataxin 10 [Source:HGNC Symbol;Acc:HGNC:10549]	GO:0005515(protein binding);GO:0005615(extracellular space);GO:0005737(cytoplasm);GO:0005829(cytosol);GO:0005886(plasma membrane);GO:0007399(nervous system development);GO:0016020(membrane);GO:0019899(enzyme binding);GO:0030425(dendrite);GO:0031175(neuron projection development);GO:0042802(identical protein binding);GO:0043025(neuronal cell body);GO:0048471(perinuclear region of cytoplasm);GO:006…	NA	NA	hsa-miR-16-1-3p	8mer	-0.2492	88	154	-11.3
hsa_circ_0001246	chr22	45700282	45740538	+	6	circRNA	ENST00000381061	ATXN10	mRNA	chr22:45693078-45700281|chr22:45740538-45806958	ataxin 10 [Source:HGNC Symbol;Acc:HGNC:10549]	GO:0005515(protein binding);GO:0005615(extracellular space);GO:0005737(cytoplasm);GO:0005829(cytosol);GO:0005886(plasma membrane);GO:0007399(nervous system development);GO:0016020(membrane);GO:0019899(enzyme binding);GO:0030425(dendrite);GO:0031175(neuron projection development);GO:0042802(identical protein binding);GO:0043025(neuronal cell body);GO:0048471(perinuclear region of cytoplasm);GO:006…	NA	NA	hsa-miR-16-2-3p	m8	-0.172	69	156	-10.81
hsa_circ_0001246	chr22	45700282	45740538	+	6	circRNA	ENST00000381061	ATXN10	mRNA	chr22:45693078-45700281|chr22:45740538-45806958	ataxin 10 [Source:HGNC Symbol;Acc:HGNC:10549]	GO:0005515(protein binding);GO:0005615(extracellular space);GO:0005737(cytoplasm);GO:0005829(cytosol);GO:0005886(plasma membrane);GO:0007399(nervous system development);GO:0016020(membrane);GO:0019899(enzyme binding);GO:0030425(dendrite);GO:0031175(neuron projection development);GO:0042802(identical protein binding);GO:0043025(neuronal cell body);GO:0048471(perinuclear region of cytoplasm);GO:006…	NA	NA	hsa-miR-18a-5p	m8	-0.1785	79	155	-16.07
hsa_circ_0001246	chr22	45700282	45740538	+	6	circRNA	ENST00000381061	ATXN10	mRNA	chr22:45693078-45700281|chr22:45740538-45806958	ataxin 10 [Source:HGNC Symbol;Acc:HGNC:10549]	GO:0005515(protein binding);GO:0005615(extracellular space);GO:0005737(cytoplasm);GO:0005829(cytosol);GO:0005886(plasma membrane);GO:0007399(nervous system development);GO:0016020(membrane);GO:0019899(enzyme binding);GO:0030425(dendrite);GO:0031175(neuron projection development);GO:0042802(identical protein binding);GO:0043025(neuronal cell body);GO:0048471(perinuclear region of cytoplasm);GO:006…	NA	NA	hsa-miR-196a-3p	m8	-0.306	95	145	-14.03
hsa_circ_0001246	chr22	45700282	45740538	+	6	circRNA	ENST00000381061	ATXN10	mRNA	chr22:45693078-45700281|chr22:45740538-45806958	ataxin 10 [Source:HGNC Symbol;Acc:HGNC:10549]	GO:0005515(protein binding);GO:0005615(extracellular space);GO:0005737(cytoplasm);GO:0005829(cytosol);GO:0005886(plasma membrane);GO:0007399(nervous system development);GO:0016020(membrane);GO:0019899(enzyme binding);GO:0030425(dendrite);GO:0031175(neuron projection development);GO:0042802(identical protein binding);GO:0043025(neuronal cell body);GO:0048471(perinuclear region of cytoplasm);GO:006…	NA	NA	hsa-miR-204-3p	8mer	-0.39715	98	156	-22.51
hsa_circ_0001246	chr22	45700282	45740538	+	6	circRNA	ENST00000381061	ATXN10	mRNA	chr22:45693078-45700281|chr22:45740538-45806958	ataxin 10 [Source:HGNC Symbol;Acc:HGNC:10549]	GO:0005515(protein binding);GO:0005615(extracellular space);GO:0005737(cytoplasm);GO:0005829(cytosol);GO:0005886(plasma membrane);GO:0007399(nervous system development);GO:0016020(membrane);GO:0019899(enzyme binding);GO:0030425(dendrite);GO:0031175(neuron projection development);GO:0042802(identical protein binding);GO:0043025(neuronal cell body);GO:0048471(perinuclear region of cytoplasm);GO:006…	NA	NA	hsa-miR-221-3p	m8	-0.155	72	144	-16.31
hsa_circ_0001246	chr22	45700282	45740538	+	6	circRNA	ENST00000381061	ATXN10	mRNA	chr22:45693078-45700281|chr22:45740538-45806958	ataxin 10 [Source:HGNC Symbol;Acc:HGNC:10549]	GO:0005515(protein binding);GO:0005615(extracellular space);GO:0005737(cytoplasm);GO:0005829(cytosol);GO:0005886(plasma membrane);GO:0007399(nervous system development);GO:0016020(membrane);GO:0019899(enzyme binding);GO:0030425(dendrite);GO:0031175(neuron projection development);GO:0042802(identical protein binding);GO:0043025(neuronal cell body);GO:0048471(perinuclear region of cytoplasm);GO:006…	NA	NA	hsa-miR-222-3p	m8	-0.186	80	142	-15.75
hsa_circ_0001246	chr22	45700282	45740538	+	6	circRNA	ENST00000381061	ATXN10	mRNA	chr22:45693078-45700281|chr22:45740538-45806958	ataxin 10 [Source:HGNC Symbol;Acc:HGNC:10549]	GO:0005515(protein binding);GO:0005615(extracellular space);GO:0005737(cytoplasm);GO:0005829(cytosol);GO:0005886(plasma membrane);GO:0007399(nervous system development);GO:0016020(membrane);GO:0019899(enzyme binding);GO:0030425(dendrite);GO:0031175(neuron projection development);GO:0042802(identical protein binding);GO:0043025(neuronal cell body);GO:0048471(perinuclear region of cytoplasm);GO:006…	NA	NA	hsa-miR-27a-3p	8mer	-0.3121	93	142	-14.89
hsa_circ_0001246	chr22	45700282	45740538	+	6	circRNA	ENST00000381061	ATXN10	mRNA	chr22:45693078-45700281|chr22:45740538-45806958	ataxin 10 [Source:HGNC Symbol;Acc:HGNC:10549]	GO:0005515(protein binding);GO:0005615(extracellular space);GO:0005737(cytoplasm);GO:0005829(cytosol);GO:0005886(plasma membrane);GO:0007399(nervous system development);GO:0016020(membrane);GO:0019899(enzyme binding);GO:0030425(dendrite);GO:0031175(neuron projection development);GO:0042802(identical protein binding);GO:0043025(neuronal cell body);GO:0048471(perinuclear region of cytoplasm);GO:006…	NA	NA	hsa-miR-27b-3p	8mer	-0.3121	93	142	-13.39
hsa_circ_0001246	chr22	45700282	45740538	+	6	circRNA	ENST00000381061	ATXN10	mRNA	chr22:45693078-45700281|chr22:45740538-45806958	ataxin 10 [Source:HGNC Symbol;Acc:HGNC:10549]	GO:0005515(protein binding);GO:0005615(extracellular space);GO:0005737(cytoplasm);GO:0005829(cytosol);GO:0005886(plasma membrane);GO:0007399(nervous system development);GO:0016020(membrane);GO:0019899(enzyme binding);GO:0030425(dendrite);GO:0031175(neuron projection development);GO:0042802(identical protein binding);GO:0043025(neuronal cell body);GO:0048471(perinuclear region of cytoplasm);GO:006…	NA	NA	hsa-miR-30a-5p	8mer	-0.4792	99	150	-15.33
hsa_circ_0001246	chr22	45700282	45740538	+	6	circRNA	ENST00000381061	ATXN10	mRNA	chr22:45693078-45700281|chr22:45740538-45806958	ataxin 10 [Source:HGNC Symbol;Acc:HGNC:10549]	GO:0005515(protein binding);GO:0005615(extracellular space);GO:0005737(cytoplasm);GO:0005829(cytosol);GO:0005886(plasma membrane);GO:0007399(nervous system development);GO:0016020(membrane);GO:0019899(enzyme binding);GO:0030425(dendrite);GO:0031175(neuron projection development);GO:0042802(identical protein binding);GO:0043025(neuronal cell body);GO:0048471(perinuclear region of cytoplasm);GO:006…	NA	NA	hsa-miR-30d-5p	8mer	-0.4792	99	142	-13.51
circRNA5114	chr12	111479071	111486824	-	4	circRNA	ENST00000647305	ATXN2	mRNA	chr12:111470742-111479070|chr12:111486824-111488476	ataxin 2 [Source:HGNC Symbol;Acc:HGNC:10555]	GO:0002091(negative regulation of receptor internalization);GO:0003723(RNA binding);GO:0005154(epidermal growth factor receptor binding);GO:0005515(protein binding);GO:0005737(cytoplasm);GO:0005794(Golgi apparatus);GO:0005802(trans-Golgi network);GO:0005829(cytosol);GO:0005844(polysome);GO:0006417(regulation of translation);GO:0008022(protein C-terminus binding);GO:0010494(cytoplasmic stress gran…	NA	NA	hsa-miR-19a-3p	m8	-0.237	83	146	-12.34
circRNA5114	chr12	111479071	111486824	-	4	circRNA	ENST00000647305	ATXN2	mRNA	chr12:111470742-111479070|chr12:111486824-111488476	ataxin 2 [Source:HGNC Symbol;Acc:HGNC:10555]	GO:0002091(negative regulation of receptor internalization);GO:0003723(RNA binding);GO:0005154(epidermal growth factor receptor binding);GO:0005515(protein binding);GO:0005737(cytoplasm);GO:0005794(Golgi apparatus);GO:0005802(trans-Golgi network);GO:0005829(cytosol);GO:0005844(polysome);GO:0006417(regulation of translation);GO:0008022(protein C-terminus binding);GO:0010494(cytoplasmic stress gran…	NA	NA	hsa-miR-19b-3p	m8	-0.237	83	146	-13.63
circRNA5114	chr12	111479071	111486824	-	4	circRNA	ENST00000647305	ATXN2	mRNA	chr12:111470742-111479070|chr12:111486824-111488476	ataxin 2 [Source:HGNC Symbol;Acc:HGNC:10555]	GO:0002091(negative regulation of receptor internalization);GO:0003723(RNA binding);GO:0005154(epidermal growth factor receptor binding);GO:0005515(protein binding);GO:0005737(cytoplasm);GO:0005794(Golgi apparatus);GO:0005802(trans-Golgi network);GO:0005829(cytosol);GO:0005844(polysome);GO:0006417(regulation of translation);GO:0008022(protein C-terminus binding);GO:0010494(cytoplasmic stress gran…	NA	NA	hsa-miR-218-5p	8mer	-0.2401	87	150	-14.63
circRNA5114	chr12	111479071	111486824	-	4	circRNA	ENST00000647305	ATXN2	mRNA	chr12:111470742-111479070|chr12:111486824-111488476	ataxin 2 [Source:HGNC Symbol;Acc:HGNC:10555]	GO:0002091(negative regulation of receptor internalization);GO:0003723(RNA binding);GO:0005154(epidermal growth factor receptor binding);GO:0005515(protein binding);GO:0005737(cytoplasm);GO:0005794(Golgi apparatus);GO:0005802(trans-Golgi network);GO:0005829(cytosol);GO:0005844(polysome);GO:0006417(regulation of translation);GO:0008022(protein C-terminus binding);GO:0010494(cytoplasmic stress gran…	NA	NA	hsa-miR-33a-5p	8mer	-0.4692	99	153	-11.79
ciRNA1534	chr7	70460582	70462015	-	1	ciRNA	ENST00000644939	AUTS2	mRNA	chr7:70460581-70462015	activator of transcription and developmental regulator AUTS2 [Source:HGNC Symbol;Acc:HGNC:14262]	GO:0001764(neuron migration);GO:0003682(chromatin binding);GO:0005515(protein binding);GO:0005575(cellular_component);GO:0005634(nucleus);GO:0005737(cytoplasm);GO:0005856(cytoskeleton);GO:0010592(positive regulation of lamellipodium assembly);GO:0015629(actin cytoskeleton);GO:0030426(growth cone);GO:0031532(actin cytoskeleton reorganization);GO:0035022(positive regulation of Rac protein signal tr…	NA	NA	hsa-miR-100-3p	m8	-0.287	93	154	-11.58
ciRNA1534	chr7	70460582	70462015	-	1	ciRNA	ENST00000644939	AUTS2	mRNA	chr7:70460581-70462015	activator of transcription and developmental regulator AUTS2 [Source:HGNC Symbol;Acc:HGNC:14262]	GO:0001764(neuron migration);GO:0003682(chromatin binding);GO:0005515(protein binding);GO:0005575(cellular_component);GO:0005634(nucleus);GO:0005737(cytoplasm);GO:0005856(cytoskeleton);GO:0010592(positive regulation of lamellipodium assembly);GO:0015629(actin cytoskeleton);GO:0030426(growth cone);GO:0031532(actin cytoskeleton reorganization);GO:0035022(positive regulation of Rac protein signal tr…	NA	NA	hsa-miR-106a-5p	m8	-0.1075	63	161	-16.99
circRNA2300	chr7	70762870	70771644	+	5	circRNA	ENST00000644939	AUTS2	mRNA	chr7:70698620-70762869|chr7:70771644-70774027	activator of transcription and developmental regulator AUTS2 [Source:HGNC Symbol;Acc:HGNC:14262]	GO:0001764(neuron migration);GO:0003682(chromatin binding);GO:0005515(protein binding);GO:0005575(cellular_component);GO:0005634(nucleus);GO:0005737(cytoplasm);GO:0005856(cytoskeleton);GO:0010592(positive regulation of lamellipodium assembly);GO:0015629(actin cytoskeleton);GO:0030426(growth cone);GO:0031532(actin cytoskeleton reorganization);GO:0035022(positive regulation of Rac protein signal tr…	NA	NA	hsa-miR-124-5p	m8	-0.102	50	140	-10.36
ciRNA1534	chr7	70460582	70462015	-	1	ciRNA	ENST00000644939	AUTS2	mRNA	chr7:70460581-70462015	activator of transcription and developmental regulator AUTS2 [Source:HGNC Symbol;Acc:HGNC:14262]	GO:0001764(neuron migration);GO:0003682(chromatin binding);GO:0005515(protein binding);GO:0005575(cellular_component);GO:0005634(nucleus);GO:0005737(cytoplasm);GO:0005856(cytoskeleton);GO:0010592(positive regulation of lamellipodium assembly);GO:0015629(actin cytoskeleton);GO:0030426(growth cone);GO:0031532(actin cytoskeleton reorganization);GO:0035022(positive regulation of Rac protein signal tr…	NA	NA	hsa-miR-125b-5p	m8	-0.122	64	153	-19.71
ciRNA1534	chr7	70460582	70462015	-	1	ciRNA	ENST00000644939	AUTS2	mRNA	chr7:70460581-70462015	activator of transcription and developmental regulator AUTS2 [Source:HGNC Symbol;Acc:HGNC:14262]	GO:0001764(neuron migration);GO:0003682(chromatin binding);GO:0005515(protein binding);GO:0005575(cellular_component);GO:0005634(nucleus);GO:0005737(cytoplasm);GO:0005856(cytoskeleton);GO:0010592(positive regulation of lamellipodium assembly);GO:0015629(actin cytoskeleton);GO:0030426(growth cone);GO:0031532(actin cytoskeleton reorganization);GO:0035022(positive regulation of Rac protein signal tr…	NA	NA	hsa-miR-128-1-5p	m8	-0.258	97	168	-27.37
circRNA2300	chr7	70762870	70771644	+	5	circRNA	ENST00000644939	AUTS2	mRNA	chr7:70698620-70762869|chr7:70771644-70774027	activator of transcription and developmental regulator AUTS2 [Source:HGNC Symbol;Acc:HGNC:14262]	GO:0001764(neuron migration);GO:0003682(chromatin binding);GO:0005515(protein binding);GO:0005575(cellular_component);GO:0005634(nucleus);GO:0005737(cytoplasm);GO:0005856(cytoskeleton);GO:0010592(positive regulation of lamellipodium assembly);GO:0015629(actin cytoskeleton);GO:0030426(growth cone);GO:0031532(actin cytoskeleton reorganization);GO:0035022(positive regulation of Rac protein signal tr…	NA	NA	hsa-miR-132-3p	m8	-0.11	52	141	-13.74
ciRNA1534	chr7	70460582	70462015	-	1	ciRNA	ENST00000644939	AUTS2	mRNA	chr7:70460581-70462015	activator of transcription and developmental regulator AUTS2 [Source:HGNC Symbol;Acc:HGNC:14262]	GO:0001764(neuron migration);GO:0003682(chromatin binding);GO:0005515(protein binding);GO:0005575(cellular_component);GO:0005634(nucleus);GO:0005737(cytoplasm);GO:0005856(cytoskeleton);GO:0010592(positive regulation of lamellipodium assembly);GO:0015629(actin cytoskeleton);GO:0030426(growth cone);GO:0031532(actin cytoskeleton reorganization);GO:0035022(positive regulation of Rac protein signal tr…	NA	NA	hsa-miR-132-5p	8mer	-0.26015	93	141	-20.03
circRNA2300	chr7	70762870	70771644	+	5	circRNA	ENST00000644939	AUTS2	mRNA	chr7:70698620-70762869|chr7:70771644-70774027	activator of transcription and developmental regulator AUTS2 [Source:HGNC Symbol;Acc:HGNC:14262]	GO:0001764(neuron migration);GO:0003682(chromatin binding);GO:0005515(protein binding);GO:0005575(cellular_component);GO:0005634(nucleus);GO:0005737(cytoplasm);GO:0005856(cytoskeleton);GO:0010592(positive regulation of lamellipodium assembly);GO:0015629(actin cytoskeleton);GO:0030426(growth cone);GO:0031532(actin cytoskeleton reorganization);GO:0035022(positive regulation of Rac protein signal tr…	NA	NA	hsa-miR-135a-2-3p	8mer	-0.44815	99	150	-17.17
ciRNA1534	chr7	70460582	70462015	-	1	ciRNA	ENST00000644939	AUTS2	mRNA	chr7:70460581-70462015	activator of transcription and developmental regulator AUTS2 [Source:HGNC Symbol;Acc:HGNC:14262]	GO:0001764(neuron migration);GO:0003682(chromatin binding);GO:0005515(protein binding);GO:0005575(cellular_component);GO:0005634(nucleus);GO:0005737(cytoplasm);GO:0005856(cytoskeleton);GO:0010592(positive regulation of lamellipodium assembly);GO:0015629(actin cytoskeleton);GO:0030426(growth cone);GO:0031532(actin cytoskeleton reorganization);GO:0035022(positive regulation of Rac protein signal tr…	NA	NA	hsa-miR-17-5p	m8	-0.1075	63	161	-21.23
ciRNA1534	chr7	70460582	70462015	-	1	ciRNA	ENST00000644939	AUTS2	mRNA	chr7:70460581-70462015	activator of transcription and developmental regulator AUTS2 [Source:HGNC Symbol;Acc:HGNC:14262]	GO:0001764(neuron migration);GO:0003682(chromatin binding);GO:0005515(protein binding);GO:0005575(cellular_component);GO:0005634(nucleus);GO:0005737(cytoplasm);GO:0005856(cytoskeleton);GO:0010592(positive regulation of lamellipodium assembly);GO:0015629(actin cytoskeleton);GO:0030426(growth cone);GO:0031532(actin cytoskeleton reorganization);GO:0035022(positive regulation of Rac protein signal tr…	NA	NA	hsa-miR-183-3p	1a	-0.1561	72	155	-22.49
ciRNA1534	chr7	70460582	70462015	-	1	ciRNA	ENST00000644939	AUTS2	mRNA	chr7:70460581-70462015	activator of transcription and developmental regulator AUTS2 [Source:HGNC Symbol;Acc:HGNC:14262]	GO:0001764(neuron migration);GO:0003682(chromatin binding);GO:0005515(protein binding);GO:0005575(cellular_component);GO:0005634(nucleus);GO:0005737(cytoplasm);GO:0005856(cytoskeleton);GO:0010592(positive regulation of lamellipodium assembly);GO:0015629(actin cytoskeleton);GO:0030426(growth cone);GO:0031532(actin cytoskeleton reorganization);GO:0035022(positive regulation of Rac protein signal tr…	NA	NA	hsa-miR-200b-3p	1a	-0.2035	79	143	-18.63
ciRNA1534	chr7	70460582	70462015	-	1	ciRNA	ENST00000644939	AUTS2	mRNA	chr7:70460581-70462015	activator of transcription and developmental regulator AUTS2 [Source:HGNC Symbol;Acc:HGNC:14262]	GO:0001764(neuron migration);GO:0003682(chromatin binding);GO:0005515(protein binding);GO:0005575(cellular_component);GO:0005634(nucleus);GO:0005737(cytoplasm);GO:0005856(cytoskeleton);GO:0010592(positive regulation of lamellipodium assembly);GO:0015629(actin cytoskeleton);GO:0030426(growth cone);GO:0031532(actin cytoskeleton reorganization);GO:0035022(positive regulation of Rac protein signal tr…	NA	NA	hsa-miR-208a-5p	8mer	-0.4813	99	143	-12.92
ciRNA1534	chr7	70460582	70462015	-	1	ciRNA	ENST00000644939	AUTS2	mRNA	chr7:70460581-70462015	activator of transcription and developmental regulator AUTS2 [Source:HGNC Symbol;Acc:HGNC:14262]	GO:0001764(neuron migration);GO:0003682(chromatin binding);GO:0005515(protein binding);GO:0005575(cellular_component);GO:0005634(nucleus);GO:0005737(cytoplasm);GO:0005856(cytoskeleton);GO:0010592(positive regulation of lamellipodium assembly);GO:0015629(actin cytoskeleton);GO:0030426(growth cone);GO:0031532(actin cytoskeleton reorganization);GO:0035022(positive regulation of Rac protein signal tr…	NA	NA	hsa-miR-20a-3p	m8	-0.135	55	146	-14.2
[truncated: 3,931 more rows]
