# Supplementary material for: Whole-Transcriptome Sequencing of Knee Joint Cartilage from Kashin–Beck Disease and Osteoarthritis Patients
Source: Int J Mol Sci. 2024 Apr 15;25(8):4348. doi: 10.3390/ijms25084348 (PMC11049856; doi:10.3390/ijms25084348)
Supplement: Supplementary file 1 [file ijms-25-04348-s001.zip › Supplementary Table S15_PCR primer.xlsx]

## Sheet: Sheet1
Supplementary Table S15. Primers used in qRT-PCR detection
Gene Symbol	Primer Sequence
GAPDH	5'-GCACCGTCAAGGCTGAGAAC-3'(S)
	5'-TGGTGAAGACGCCAGTGGA-3'(AS)
PTH1R	5'-ACACTGGCACTGGACTTCAA-3'(S)
	5'-GCCGACATTGGTCACACTTG-3'(AS)
SMPD3	5'-TCCTTCATACCCACCACCTACG-3'(S)
	5'-GAAAGCCGAGAAACGCAAA-3'(AS)
LINC00899	5'-CGTGGGGCTGAAGACATAGA-3'(S)
	5'-CCAGGAGGAGACCTGATTGC-3'(AS)
hsa_circ_0069064	5'-AGGAGAATGTCAGAGCCACC-3'(S)
	5'-AGGCCGGAACTTCTGATTGA-3'(AS)
S, sense; AS, antisence.
